# Supplementary material for: Measuring the health-related Sustainable Development Goals in 188 countries: a baseline analysis from the Global Burden of Disease Study 2015
Source: PubMed Central journal article supplement (PMC5055583; doi:10.1016/s0140-6736(16)31467-2), 2016-10-08
Supplement: mmc3.pdf [file mmc3.pdf]

# Progress towards the Sustainable Development Goals

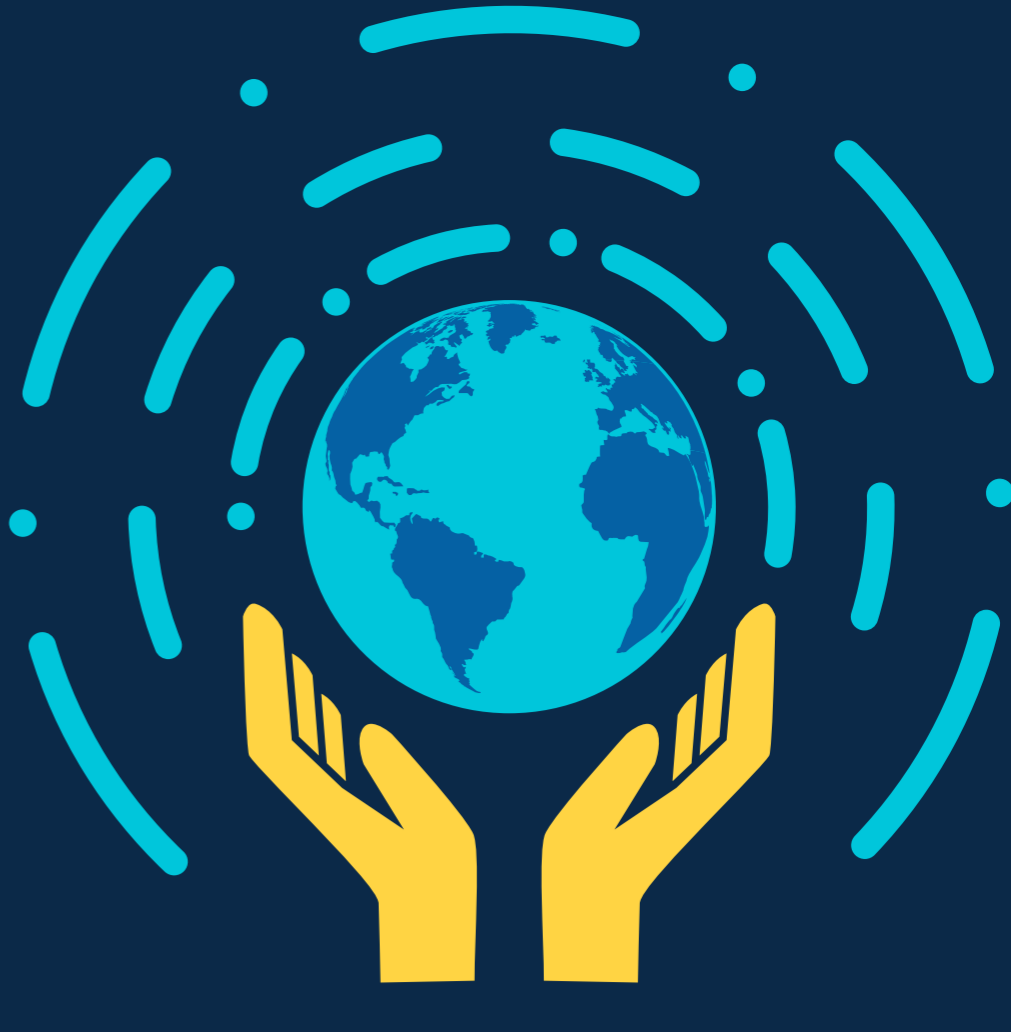

## What are the Sustainable Development Goals?

In September, 2015, the United Nations General Assembly established the Sustainable Development Goals (SDGs) to replace the Millennium Development Goals, which expired in 2015. The SDGs specify:

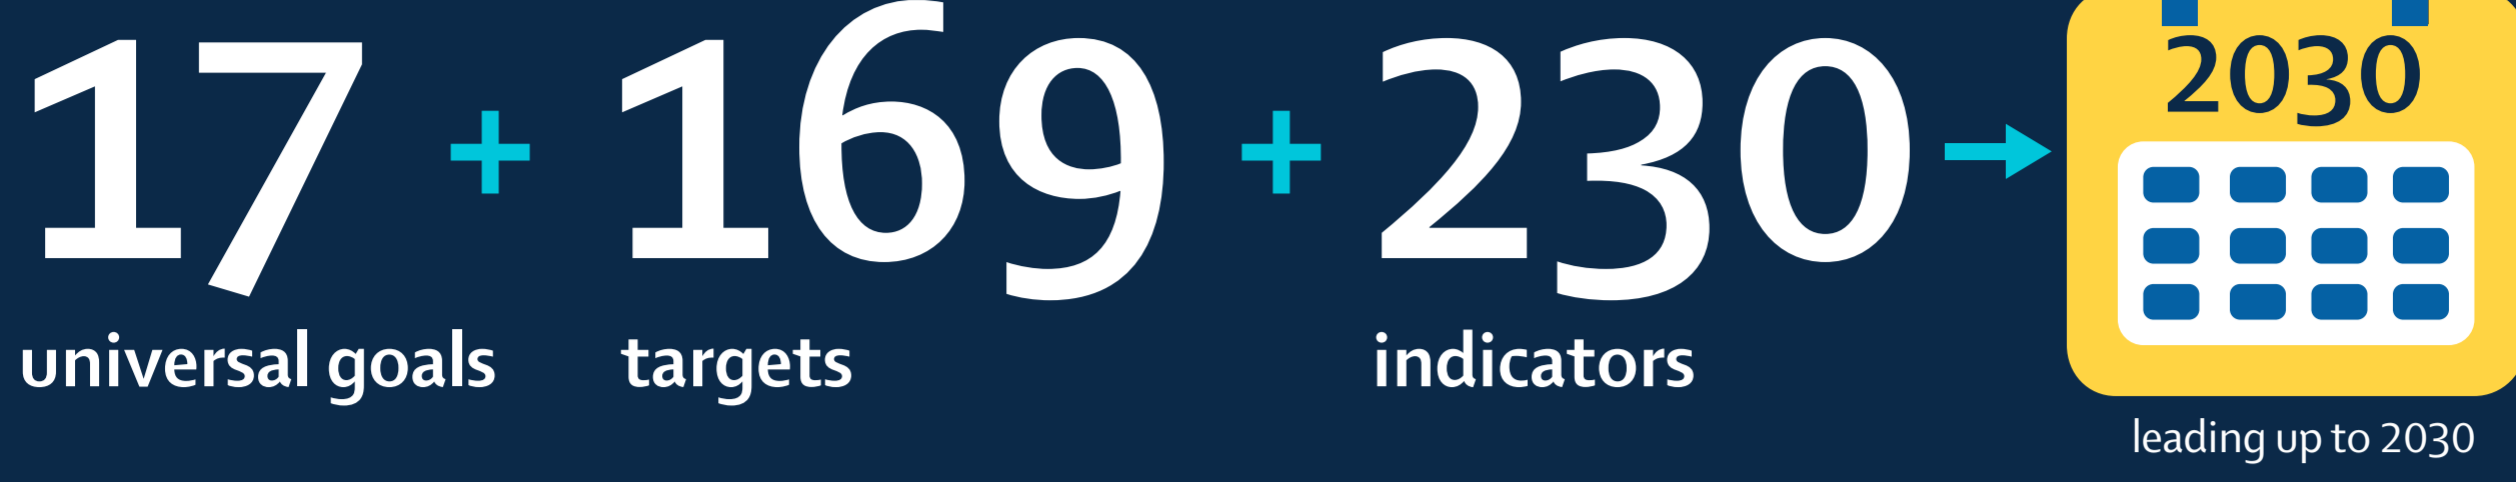

To allow for easier comparison, an indexed score has been created for each health-related indicator, with the worst observed value in the period 1990–2015 rated as zero, and the best as 100<sup>1</sup>.

## 2015 Snapshot

Highest, median, and lowest SDG index scores for 2015

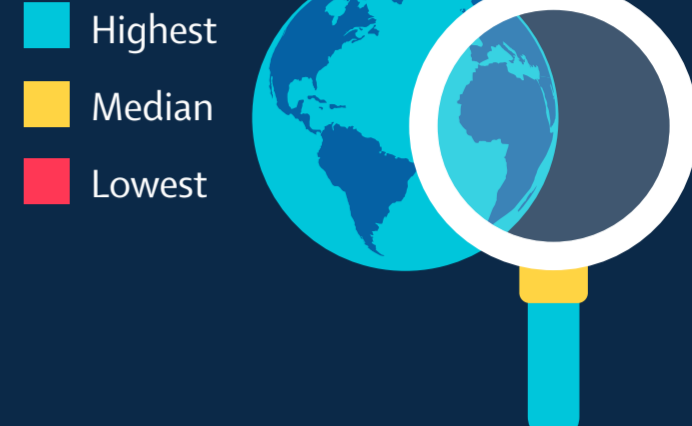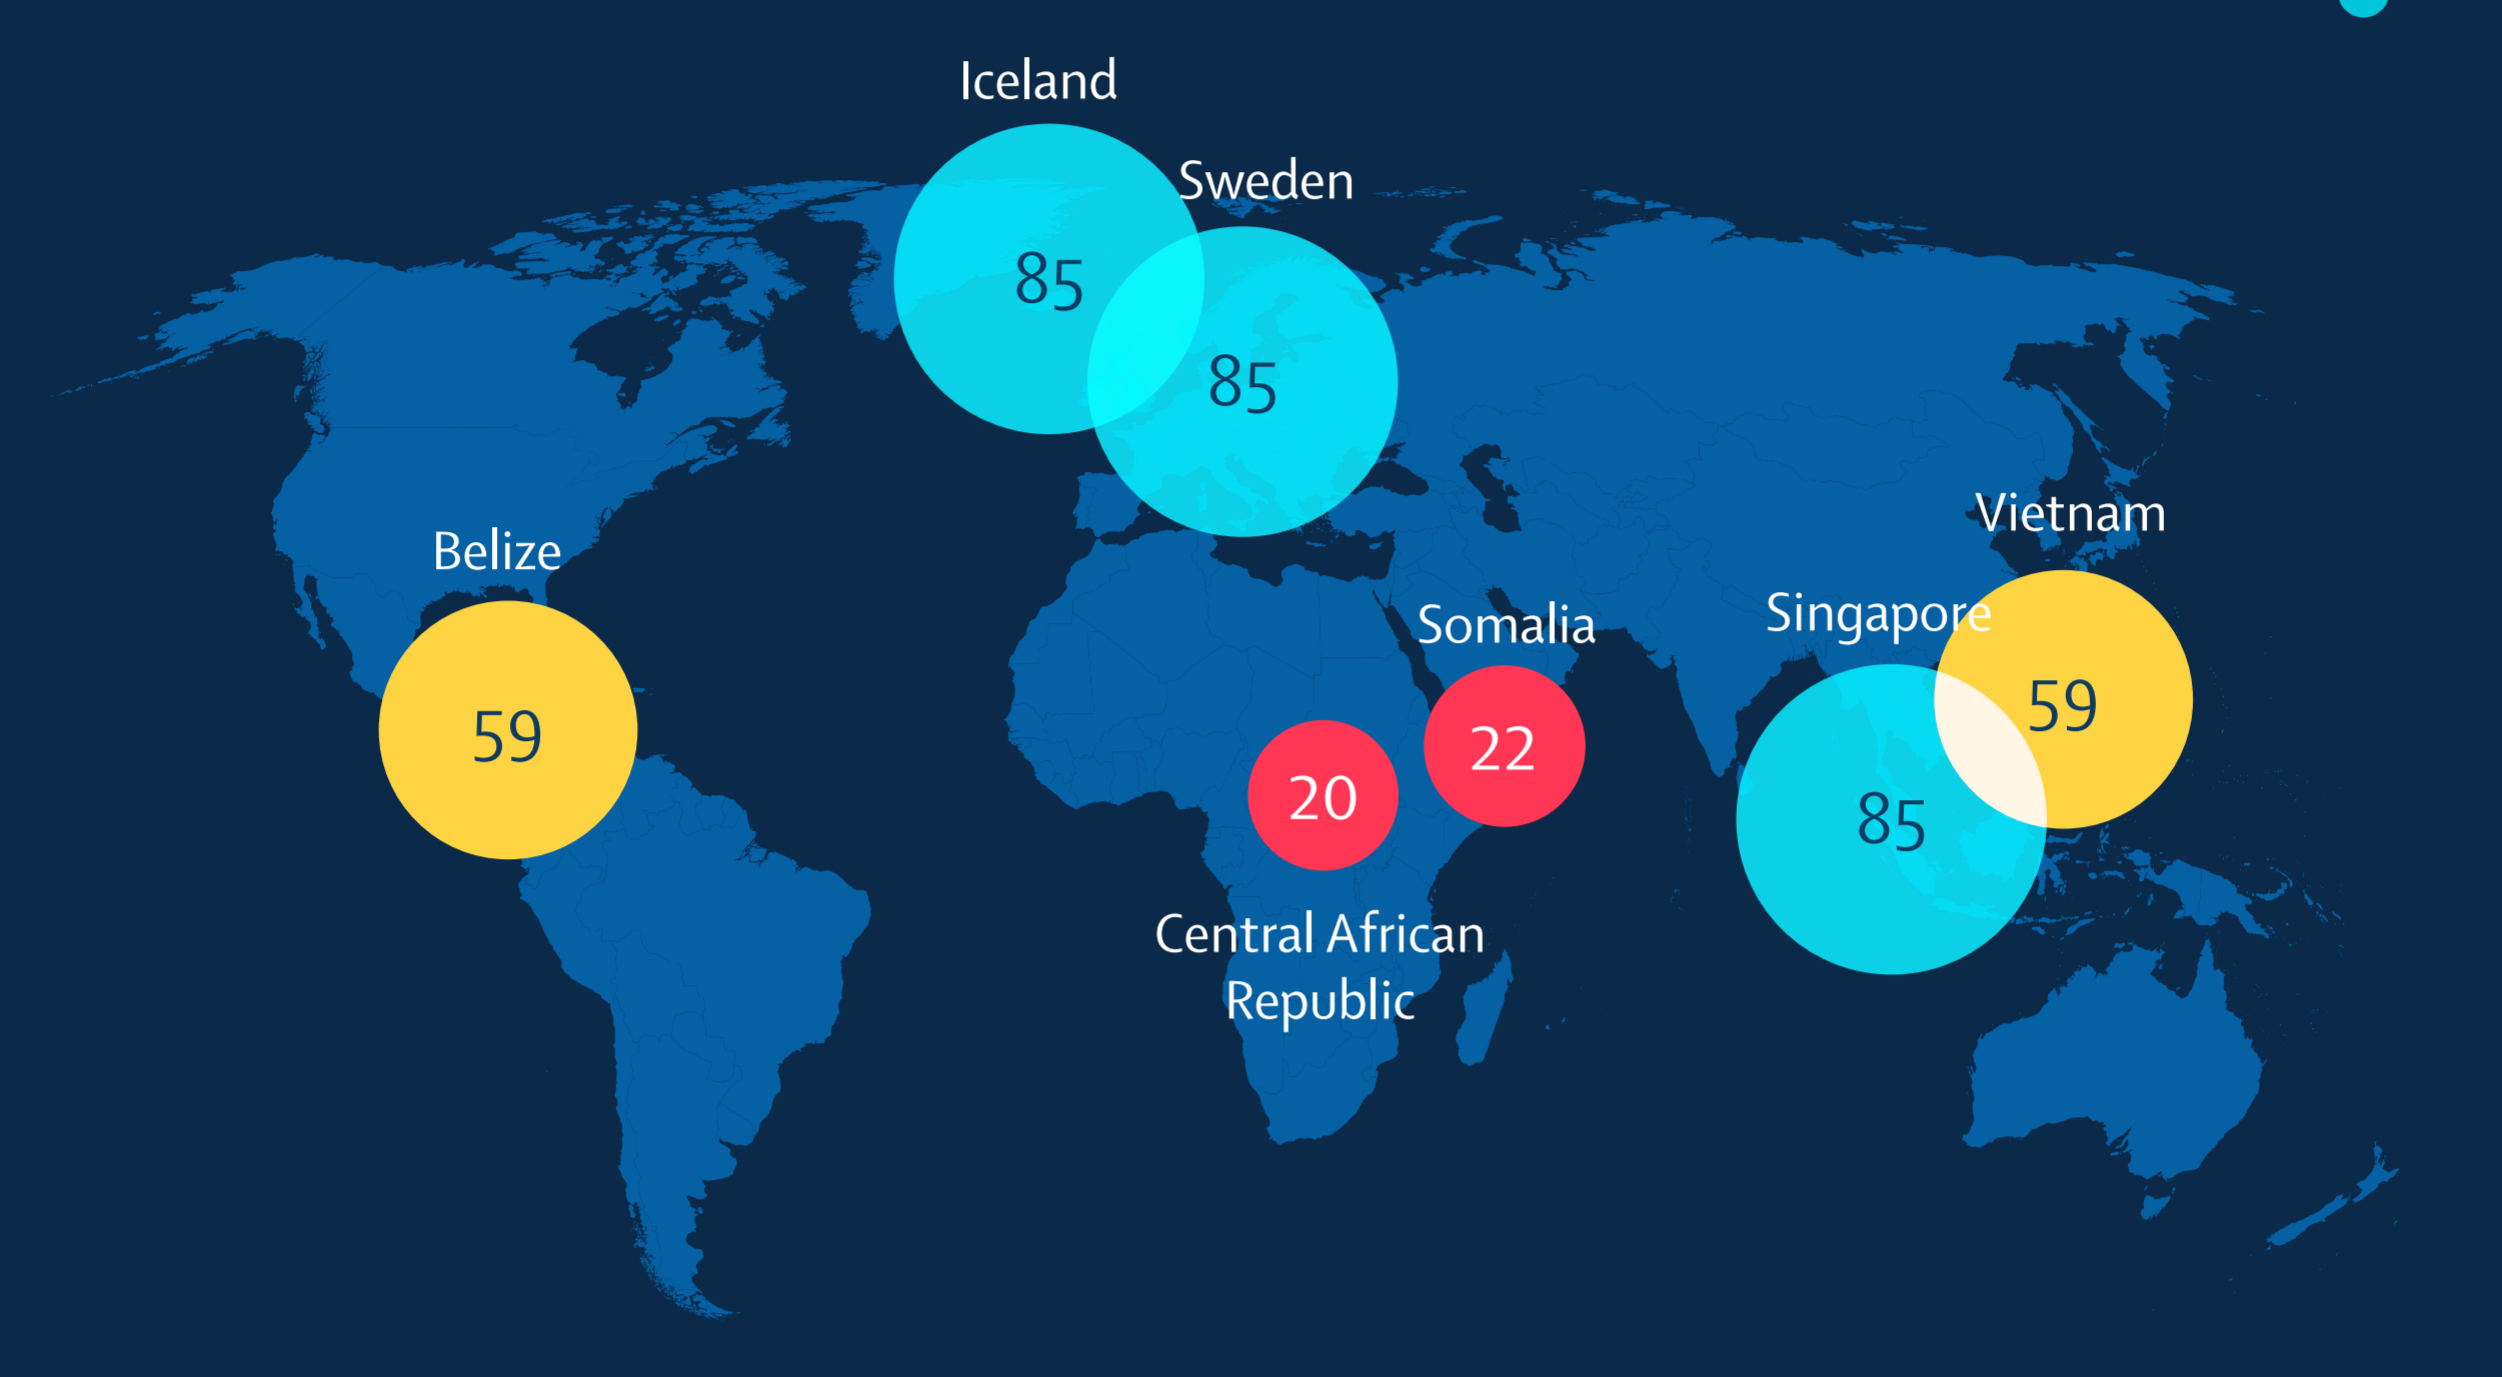

## Progress 2000–2015

There's been an overall improvement across the SDG health indicators. Indicators associated with the original Millennium Development Goals show more improvement than those which are not.

Median change 2000–2015

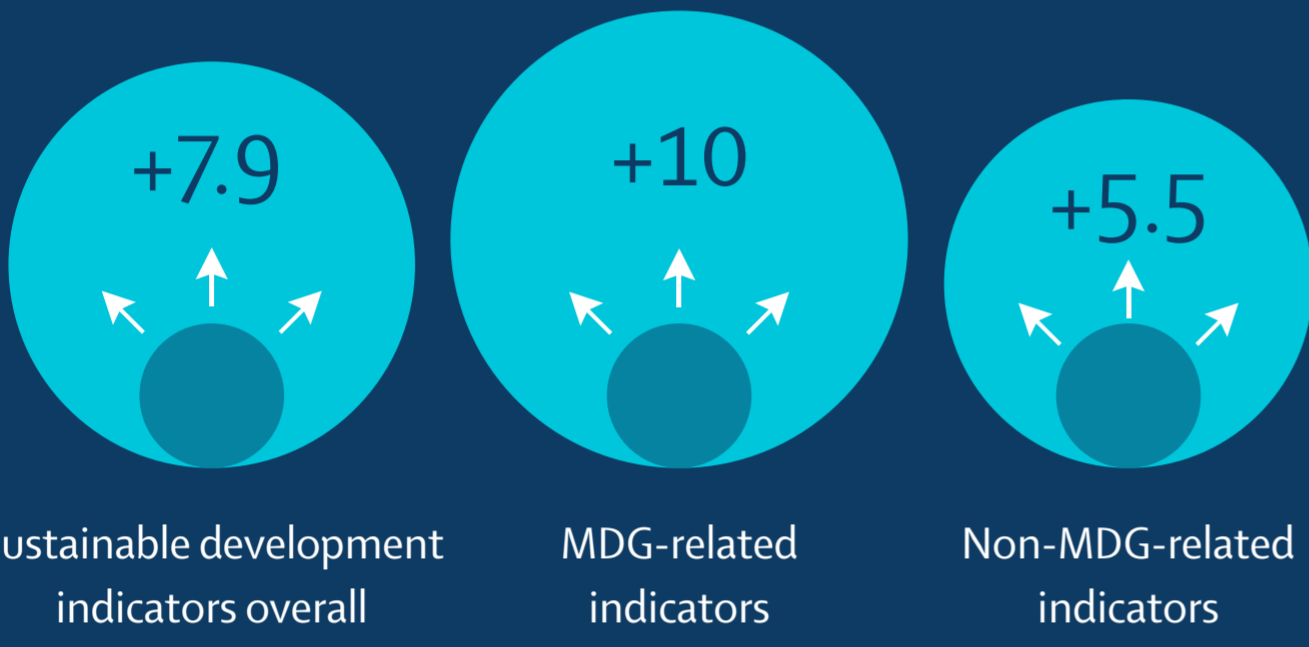

This may reflect the effect of programmes set up to address the original Millennium Development Goals.

Indicators showing the most and least improvement

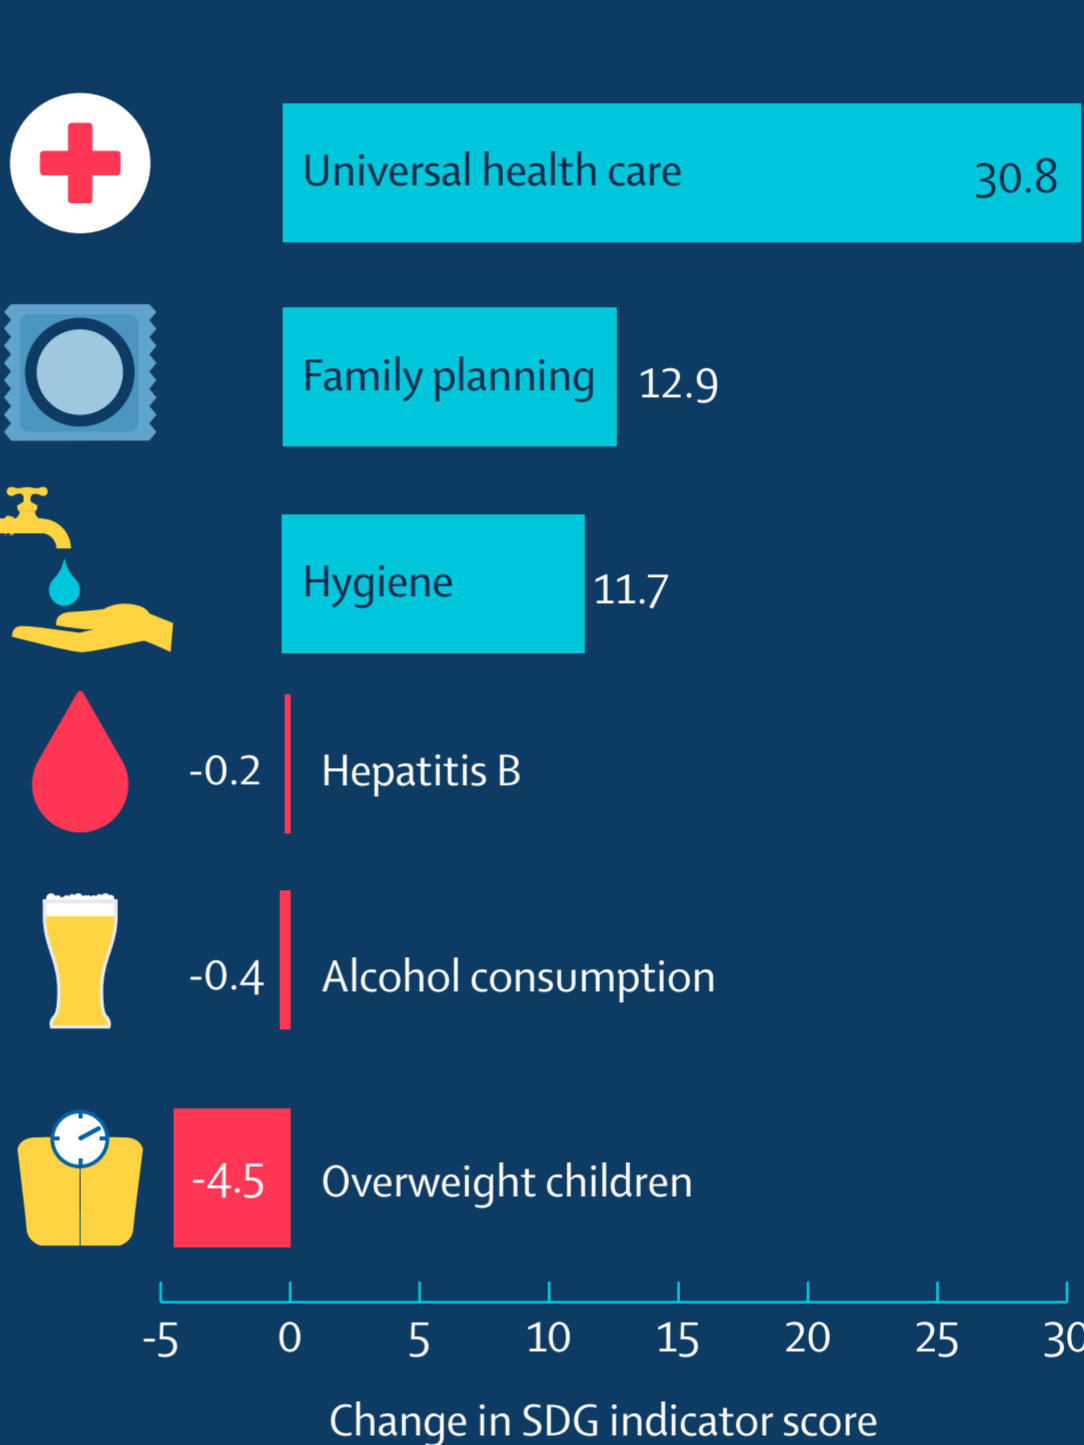

## Sustainable Development Goals and the Socio-demographic Index

The Socio-demographic Index is a summary measure that combines income per capita, educational attainment, and overall fertility rate. Health-related SDGs and MDGs are well predicted by Socio-demographic Index.

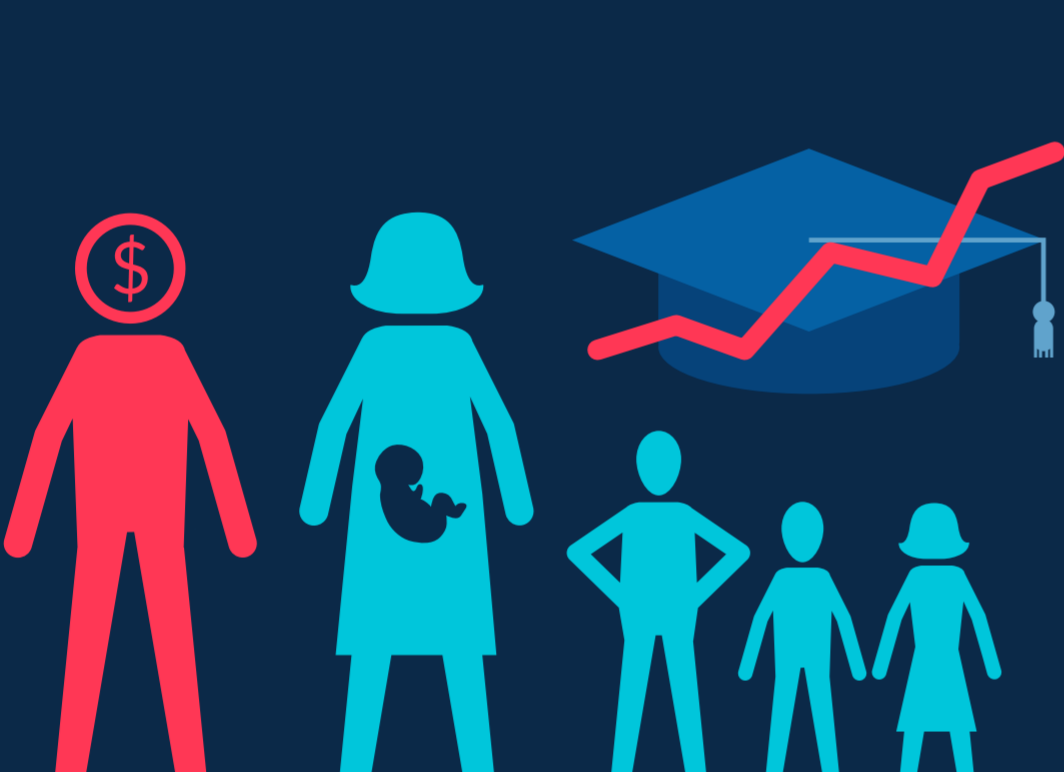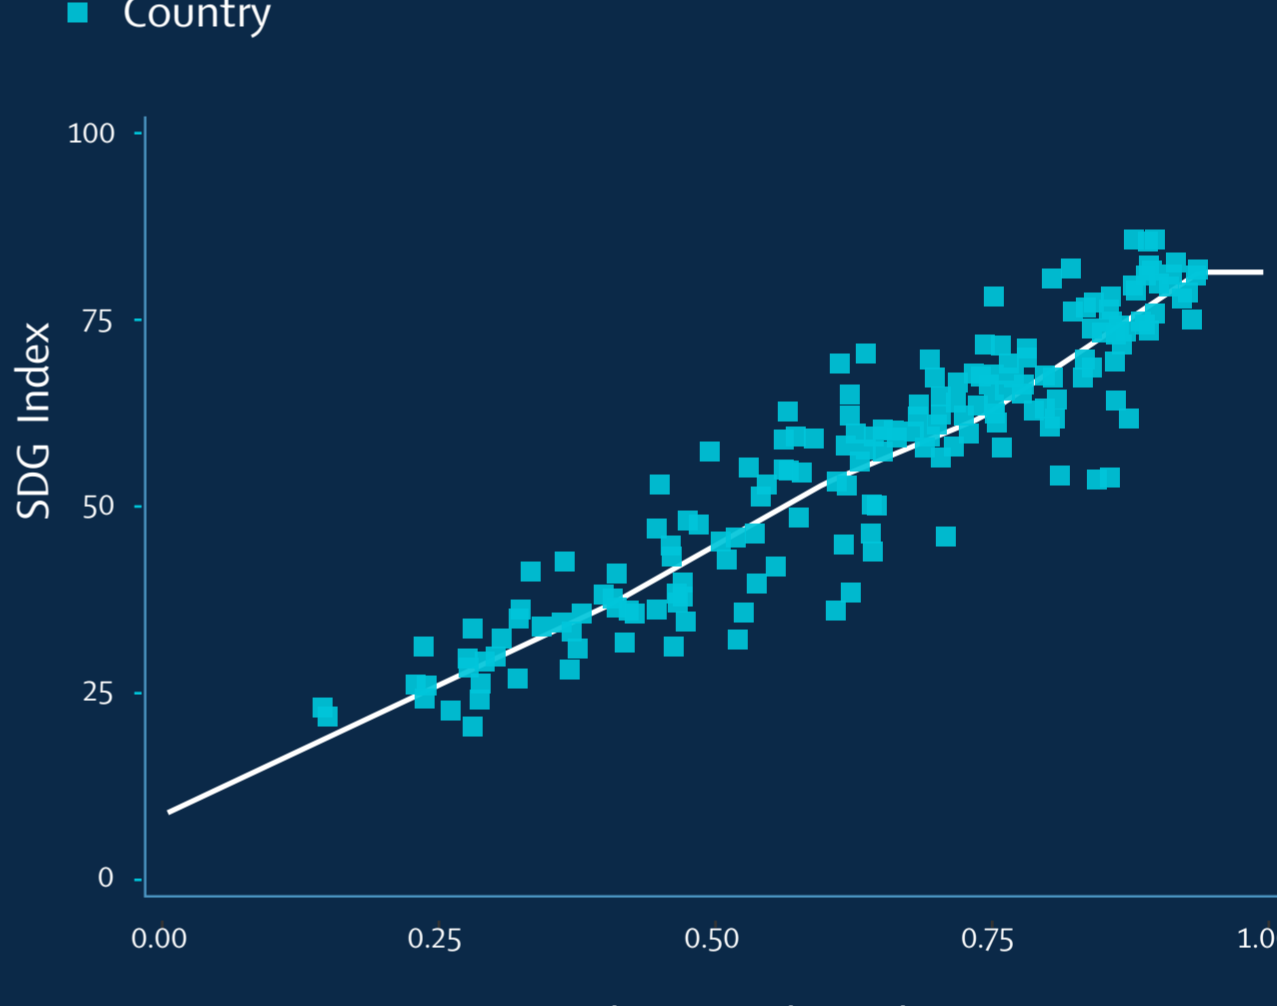

However, in some cases a country's SDG progress varied significantly from that which would be expected based on its Socio-demographic Index.

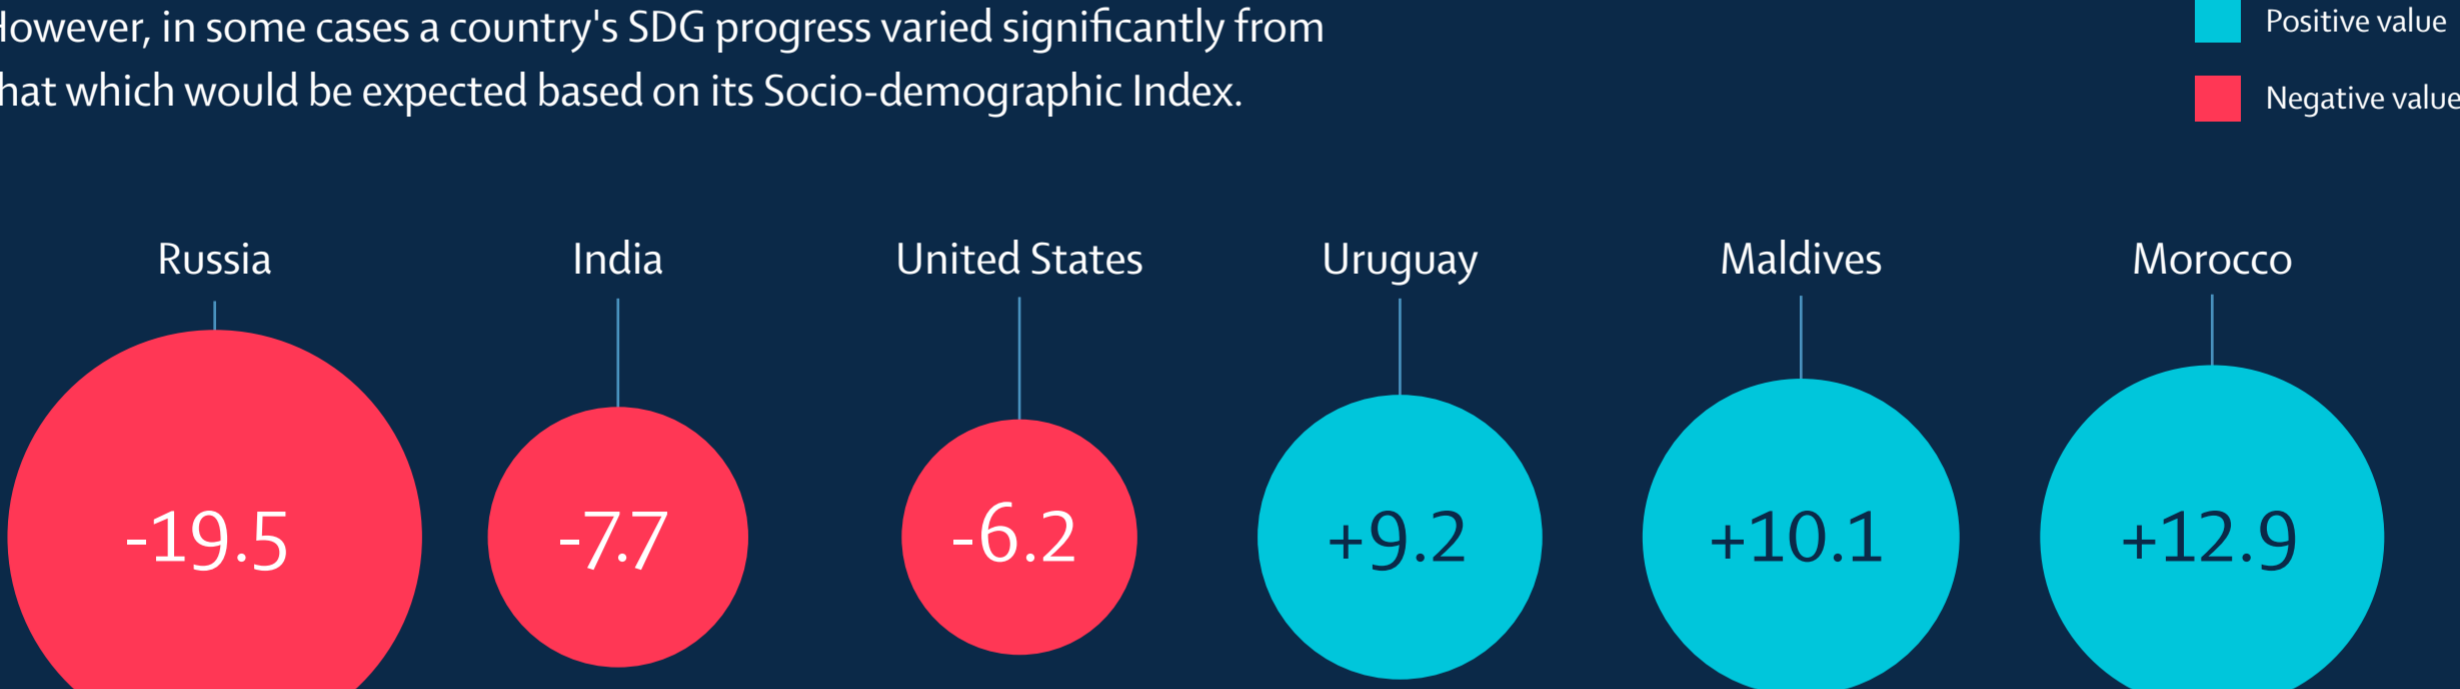

Difference between predicted and actual SDG index score (ie, Russia scored 19.5 points lower than expected)

Some countries had considerably lower SDG index scores than their Socio-demographic Index alone would have predicted:

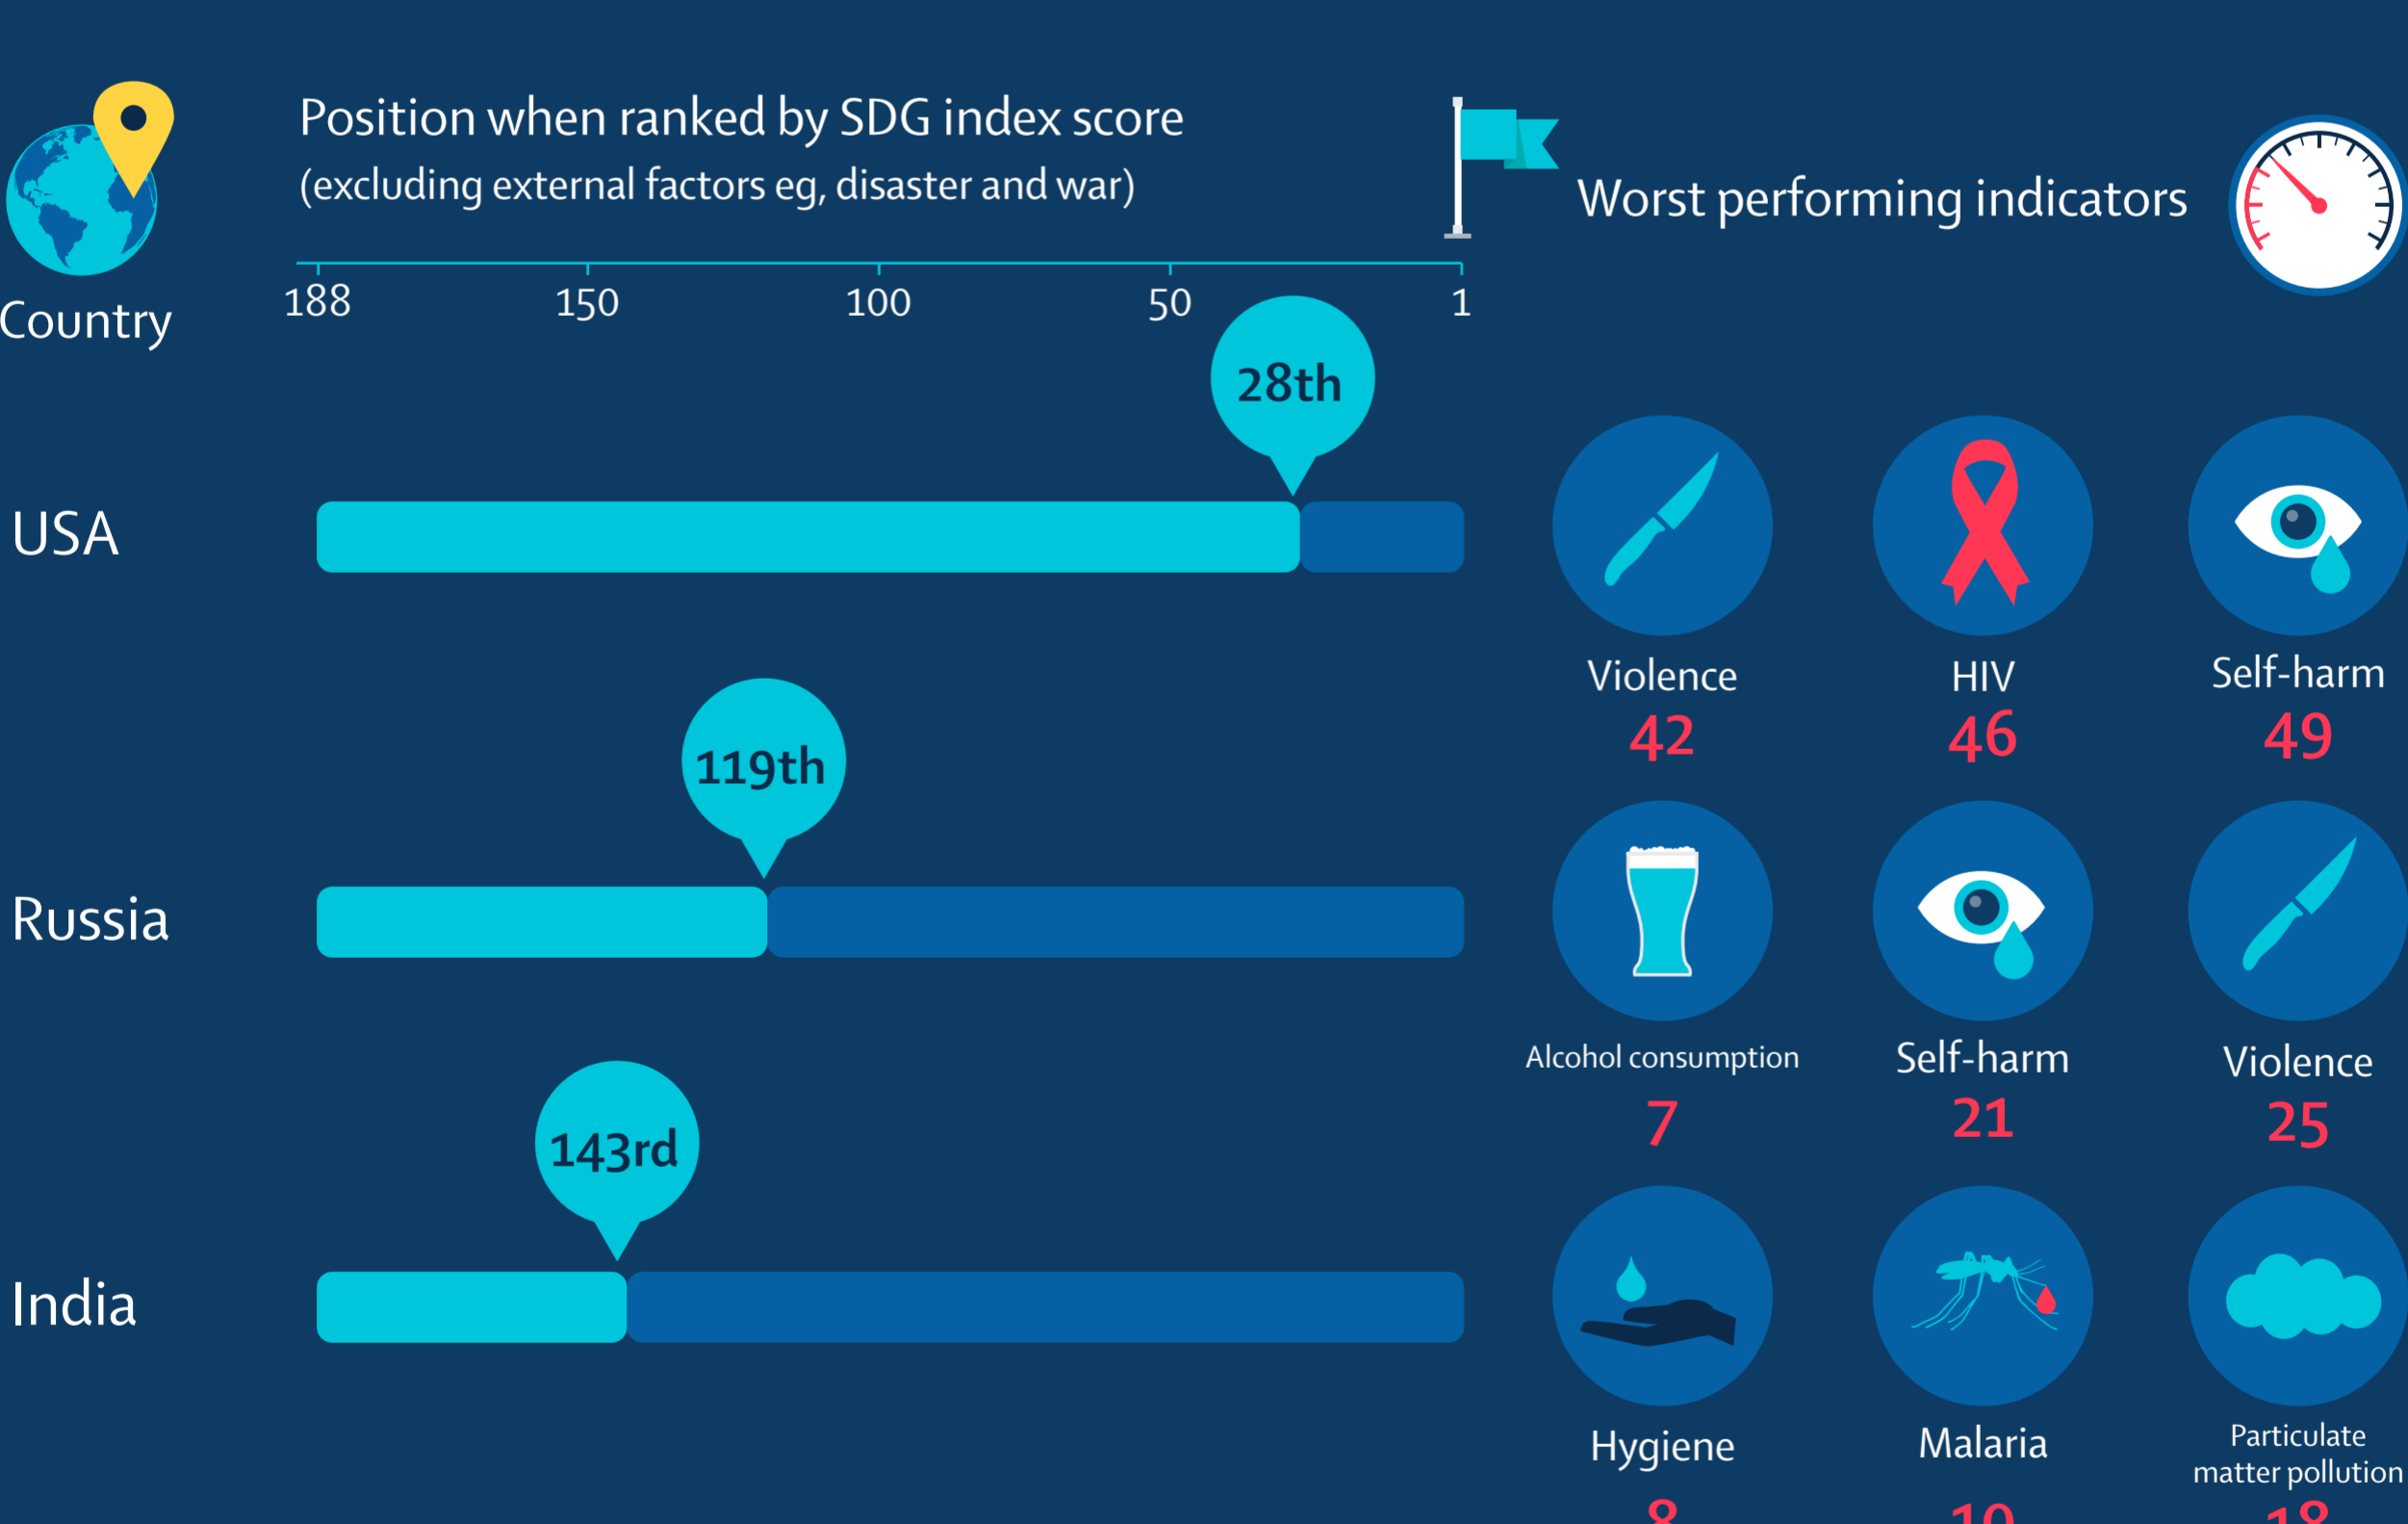

While others performed better than their Socio-demographic Index would indicate:

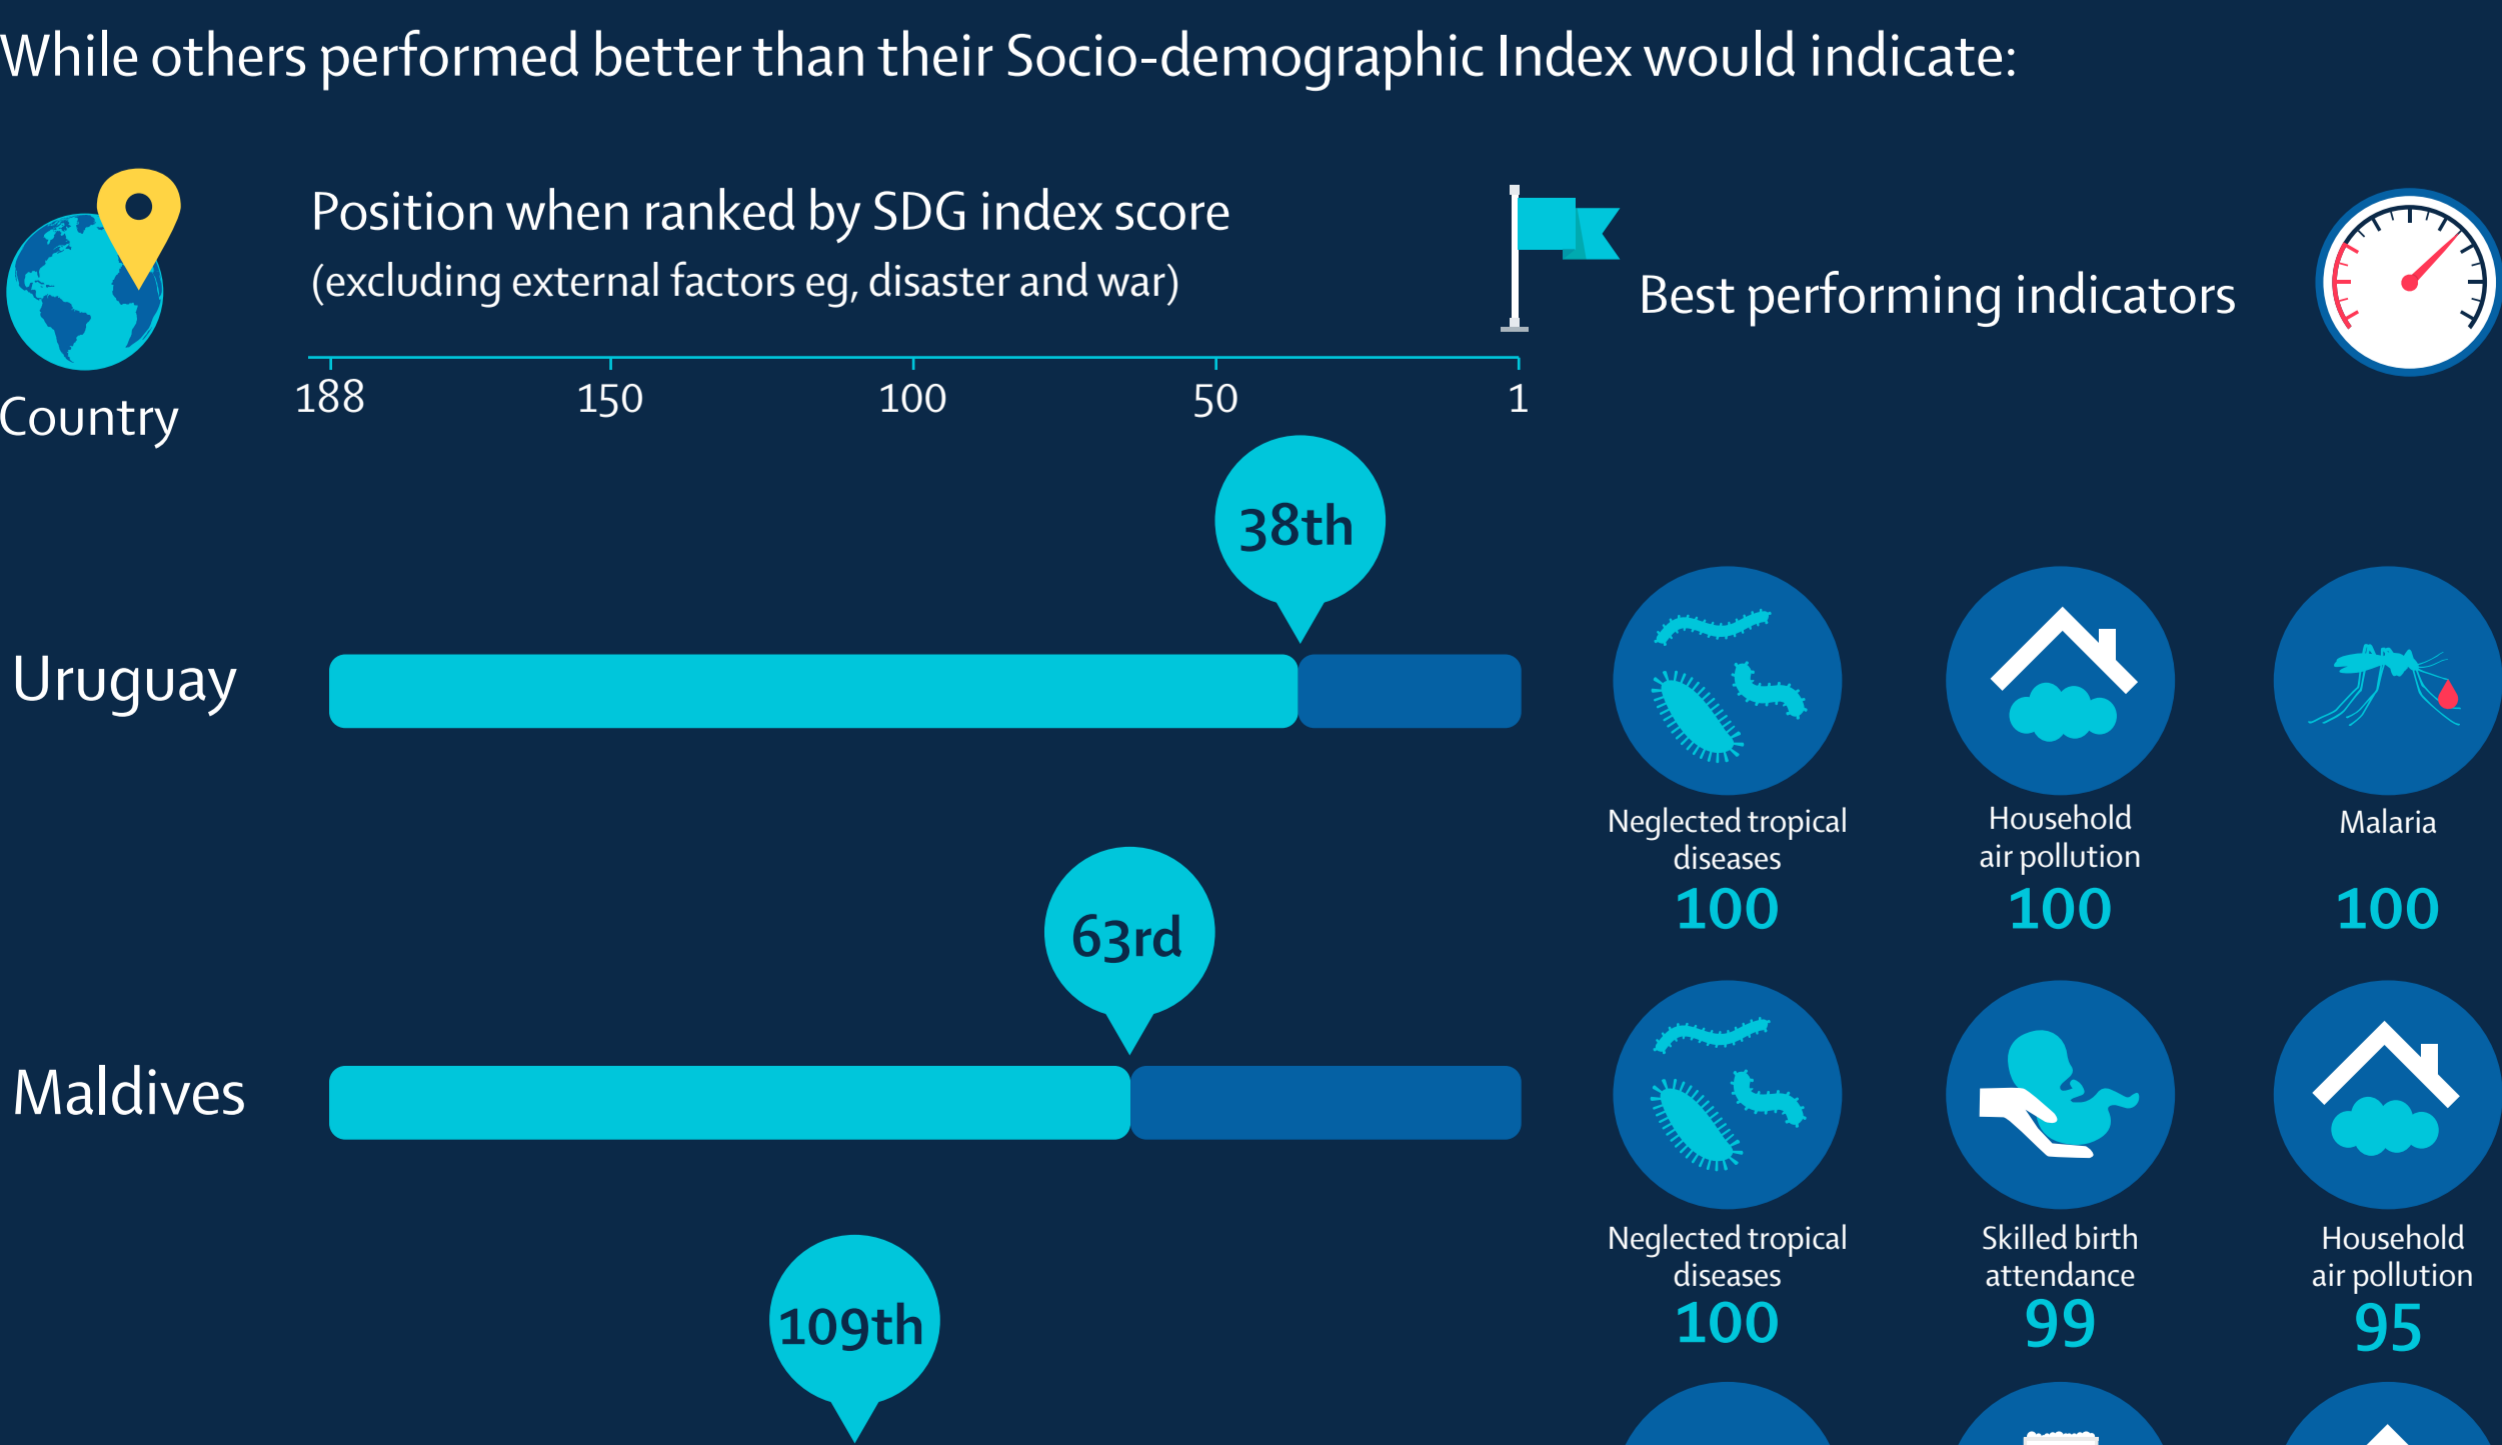

To find out more see: [www.thelancet.com/gbd](http://www.thelancet.com/gbd)

Source

1. GBD 2015 SDG Collaborators. Measuring the health-related Sustainable Development Goals in 188 countries: a baseline analysis from the Global Burden of Disease Study 2015. *Lancet* 2016; published online Sept 21. [http://dx.doi.org/10.1016/S0140-6736\(16\)31467-2](http://dx.doi.org/10.1016/S0140-6736(16)31467-2)
