# Supplementary material for: Measuring the health-related Sustainable Development Goals in 188 countries: a baseline analysis from the Global Burden of Disease Study 2015
Source: Lancet. 2016 Oct 8;388(10053):1813–50. doi: 10.1016/S0140-6736(16)31467-2 (PMC5055583; doi:10.1016/S0140-6736(16)31467-2)
Supplement: Supplementary appendices [file mmc2.pdf]

# THE LANCET

## **Supplementary appendix**

This appendix formed part of the original submission and has been peer reviewed.  
We post it as supplied by the authors.

Supplement to: GBD 2015 SDG Collaborators. Measuring the health-related Sustainable Development Goals in 188 countries: a baseline analysis from the Global Burden of Disease Study 2015. *Lancet* 2016; published online Sept 21. [http://dx.doi.org/10.1016/S0140-6736\(16\)31467-2](http://dx.doi.org/10.1016/S0140-6736(16)31467-2).

## Supplementary Results to Measuring the health-related Sustainable Development Goals in 188 countries: An analysis from the Global Burden of Disease Study 2015

The supplementary results offer additional results tables and figures, as well as more detailed methodological figures.

## List of Supplementary Results: Figures & Tables

Figure 1. Performance for the health-related SDG index, MDG index, and non-MDG index, and 33 individual health-related indicators by country, 1990, page 1

Figure 2. Performance for the health-related SDG index, MDG index, and non-MDG index, and 33 individual health-related indicators by country, 2000, page 2

Figure 3. Map of health-related SDG index, by quintile, 1990, page 3

Figure 4. Map of health-related SDG index, by quintile, 2000, page 4

Figure 5. Absolute change in the health-related SDG index, health-related MDG index, and 33 individual health-related SDG indicators (rescaled), by country from 1990 to 2015, page 5

Figure 6. Absolute change in the health-related SDG index, health-related MDG index, and 33 individual health-related SDG indicators (rescaled), by country from 2000 to 2015, page 6

Figure 7a. Appendix Figure 7a. Comparison of health-related SDG index values using the arithmetic mean of targets versus the geometric mean, 2015, page 7

Figure 7b. Comparison of health-related SDG index ranks by country using the arithmetic mean of targets versus the geometric mean, 2015, page 8

Figure 8a. Comparison of health-related SDG index values using the geometric mean of the minimums across each target versus the standard geometric mean, 2015, page 9

Figure 8b. Comparison of health-related SDG index ranks by country using the geometric mean of the minimums across each target versus the standard geometric mean, 2015, page 10

Figure 9. Map of observed health-related SDG index minus expected health-related SDG index, on the basis of SDI alone, in 1990, page 11

Figure 10. Map of observed health-related SDG index minus expected health-related SDG index, on the basis of SDI alone, in 2000, page 12

Table 1a. Master country table w/ scaled values for each SDG health-related indicator by country for 1990, 2000, and 2015, page 13

Table 1b. Master country table w/ unscaled values for each SDG health-related indicator by country for 1990, 2000, and 2015, page 175

Table 2. Correlation coefficient with SDI of each composite index and health-related indicator, across all countries and years from 1990 to 2015, 5 year intervals, page 346

Figure 1. Performance for the health-related SDG index, MDG index, and non-MDG index, and 33 individual health-related indicators by country, 1990

|  |                          | SDG Index | MDG Index | Non-MDG Index | Disaster | Smoking | Obesity | Weight | MDG | SDG | 500 | NN | Mort | TB  | Malaria | NDGs | NCDs | Suicide | Road | Need | Met | Facility | Access | Wash | Mort | Smoking | Water | Sanitation | Hygiene | Air | Poll | Biodiv | MDG | 5   |     |     |     |    |
|--|--------------------------|-----------|-----------|---------------|----------|---------|---------|--------|-----|-----|-----|----|------|-----|---------|------|------|---------|------|------|-----|----------|--------|------|------|---------|-------|------------|---------|-----|------|--------|-----|-----|-----|-----|-----|----|
|  | Sweden [1]               | 75        | 83        | 72            | 100      | 100     | 61      | 69     | 96  | 76  | 76  | 50 | 76   | 100 | 85      | 100  | 65   | 38      | 58   | 69   | 82  | 72       | 62     | 85   | 76   | 59      | 46    | 81         | 100     | 100 | 71   | 100    | 80  | 66  | 100 |     |     |    |
|  | Brunei [2]               | 74        | 77        | 73            | 100      | 100     | 100     | 86     | 50  | 99  | 70  | 77 | 53   | 41  | 100     | 57   | 100  | 48      | 75   | 66   | 40  | 77       | 50     | 62   | 86   | 70      | 65    | 67         | 100     | 100 | 70   | 100    | 84  | 82  | 64  | 100 |     |    |
|  | Andorra [3]              | 73        | 83        | 69            | 100      | 100     | 100     | 61     | 81  | 100 | 79  | 80 | 44   | 71  | 100     | 81   | 100  | 84      | 62   | 28   | 75  | 86       | 69     | 61   | 86   | 80      | 74    | 37         | 83      | 100 | 100  | 70     | 100 | 75  | 67  | 79  | 100 |    |
|  | Australia [4]            | 73        | 82        | 70            | 100      | 100     | 100     | 77     | 73  | 99  | 71  | 72 | 49   | 83  | 100     | 69   | 100  | 60      | 47   | 49   | 56  | 90       | 67     | 60   | 84   | 89      | 71    | 43         | 78      | 100 | 100  | 72     | 100 | 64  | 79  | 61  | 100 |    |
|  | Canada [5]               | 73        | 82        | 70            | 100      | 100     | 100     | 58     | 75  | 99  | 73  | 74 | 41   | 83  | 100     | 72   | 100  | 60      | 47   | 57   | 58  | 92       | 65     | 62   | 82   | 82      | 61    | 38         | 72      | 100 | 100  | 84     | 100 | 73  | 75  | 62  | 100 |    |
|  | Netherlands [6]          | 72        | 82        | 68            | 100      | 100     | 100     | 74     | 67  | 99  | 72  | 72 | 40   | 70  | 100     | 83   | 100  | 58      | 52   | 51   | 67  | 82       | 83     | 62   | 71   | 78      | 78    | 33         | 85      | 100 | 100  | 61     | 100 | 65  | 55  | 70  | 100 |    |
|  | Cyprus [7]               | 71        | 79        | 68            | 100      | 100     | 100     | 52     | 66  | 99  | 65  | 63 | 60   | 85  | 100     | 82   | 100  | 63      | 82   | 54   | 46  | 76       | 58     | 68   | 69   | 74      | 71    | 45         | 67      | 100 | 100  | 60     | 100 | 62  | 59  | 59  | 100 |    |
|  | Singapore [8]            | 71        | 79        | 68            | 100      | 100     | 100     | 76     | 68  | 99  | 75  | 77 | 46   | 48  | 100     | 62   | 100  | 48      | 40   | 88   | 66  | 72       | 79     | 59   | 63   | 53      | 80    | 67         | 100     | 100 | 100  | 100    | 60  | 90  | 55  | 64  | 24  |    |
|  | Ireland [9]              | 71        | 80        | 67            | 100      | 100     | 100     | 55     | 73  | 99  | 71  | 72 | 46   | 67  | 100     | 81   | 100  | 55      | 52   | 49   | 68  | 79       | 73     | 54   | 63   | 68      | 70    | 35         | 82      | 100 | 100  | 64     | 100 | 69  | 68  | 76  | 100 |    |
|  | New Zealand [10]         | 71        | 80        | 66            | 100      | 100     | 100     | 48     | 66  | 99  | 68  | 74 | 54   | 75  | 100     | 63   | 100  | 53      | 46   | 53   | 47  | 84       | 58     | 58   | 84   | 74      | 76    | 43         | 67      | 100 | 100  | 72     | 100 | 68  | 81  | 62  | 100 |    |
|  | Japan [11]               | 71        | 82        | 67            | 46       | 100     | 100     | 90     | 66  | 99  | 79  | 84 | 69   | 62  | 100     | 62   | 100  | 73      | 40   | 63   | 65  | 60       | 87     | 58   | 81   | 67      | 72    | 29         | 68      | 100 | 100  | 74     | 100 | 94  | 64  | 77  | 100 |    |
|  | Switzerland [12]         | 70        | 82        | 66            | 100      | 100     | 100     | 67     | 73  | 99  | 73  | 72 | 40   | 74  | 100     | 83   | 100  | 66      | 32   | 40   | 59  | 85       | 81     | 61   | 78   | 79      | 47    | 35         | 96      | 100 | 100  | 60     | 100 | 63  | 63  | 68  | 100 |    |
|  | United Kingdom [13]      | 70        | 81        | 66            | 100      | 100     | 100     | 67     | 68  | 99  | 71  | 72 | 53   | 74  | 100     | 85   | 100  | 51      | 56   | 56   | 71  | 88       | 60     | 60   | 68   | 68      | 60    | 35         | 75      | 100 | 100  | 68     | 100 | 66  | 60  | 76  | 40  |    |
|  | Norway [14]              | 70        | 83        | 65            | 38       | 100     | 100     | 64     | 74  | 99  | 72  | 73 | 48   | 75  | 100     | 81   | 100  | 60      | 43   | 67   | 69  | 94       | 68     | 62   | 76   | 69      | 59    | 30         | 82      | 100 | 100  | 72     | 100 | 68  | 69  | 70  | 100 |    |
|  | Italy [15]               | 69        | 79        | 65            | 100      | 100     | 100     | 48     | 69  | 99  | 71  | 68 | 37   | 72  | 100     | 83   | 100  | 61      | 63   | 50   | 53  | 68       | 79     | 57   | 74   | 88      | 62    | 38         | 68      | 100 | 100  | 62     | 100 | 63  | 55  | 60  | 100 |    |
|  | Germany [16]             | 69        | 80        | 65            | 100      | 100     | 100     | 67     | 62  | 99  | 71  | 73 | 51   | 69  | 100     | 85   | 100  | 54      | 45   | 42   | 59  | 75       | 70     | 57   | 69   | 82      | 63    | 38         | 78      | 100 | 100  | 60     | 100 | 69  | 56  | 73  | 100 |    |
|  | Luxembourg [17]          | 69        | 82        | 64            | 100      | 100     | 100     | 65     | 69  | 99  | 72  | 75 | 47   | 74  | 100     | 81   | 100  | 54      | 41   | 43   | 50  | 81       | 74     | 60   | 68   | 80      | 62    | 37         | 78      | 100 | 100  | 56     | 100 | 70  | 53  | 62  | 100 |    |
|  | Israel [18]              | 69        | 81        | 65            | 100      | 100     | 100     | 62     | 68  | 99  | 66  | 68 | 49   | 75  | 100     | 81   | 100  | 58      | 59   | 90   | 63  | 87       | 62     | 61   | 71   | 81      | 78    | 39         | 62      | 100 | 100  | 76     | 100 | 76  | 56  | 60  | 7   |    |
|  | Finland [19]             | 68        | 84        | 63            | 100      | 100     | 100     | 59     | 72  | 99  | 77  | 76 | 61   | 69  | 100     | 81   | 100  | 55      | 25   | 48   | 59  | 90       | 74     | 62   | 77   | 70      | 31    | 47         | 71      | 100 | 100  | 68     | 100 | 72  | 76  | 53  | 29  |    |
|  | Iceland [20]             | 68        | 83        | 61            | 27       | 100     | 100     | 38     | 84  | 99  | 78  | 80 | 50   | 67  | 100     | 81   | 100  | 65      | 47   | 69   | 68  | 85       | 60     | 62   | 81   | 67      | 50    | 30         | 100     | 100 | 100  | 63     | 100 | 61  | 74  | 72  | 100 |    |
|  | Antigua and Barbuda [21] | 68        | 62        | 71            | 100      | 89      | 89      | 81     | 48  | 98  | 58  | 56 | 36   | 62  | 100     | 76   | 100  | 52      | 98   | 71   | 73  | 87       | 44     | 60   | 69   | 52      | 52    | 95         | 73      | 40  | 74   | 37     | 95  | 63  | 58  | 50  | 100 |    |
|  | Malta [22]               | 68        | 78        | 62            | 100      | 100     | 100     | 41     | 69  | 98  | 71  | 68 | 49   | 77  | 100     | 82   | 100  | 60      | 76   | 68   | 77  | 57       | 52     | 73   | 58   | 72      | 77    | 69         | 29      | 89  | 100  | 100    | 44  | 100 | 52  | 61  | 65  | 22 |
|  | France [23]              | 67        | 79        | 63            | 100      | 100     | 100     | 64     | 63  | 99  | 72  | 75 | 37   | 53  | 100     | 83   | 100  | 64      | 31   | 40   | 49  | 82       | 73     | 58   | 81   | 77      | 61    | 25         | 89      | 100 | 100  | 54     | 100 | 68  | 62  | 64  | 100 |    |
|  | Austria [24]             | 67        | 79        | 63            | 100      | 100     | 100     | 59     | 68  | 99  | 71  | 71 | 47   | 47  | 100     | 81   | 100  | 57      | 33   | 32   | 53  | 66       | 65     | 56   | 71   | 86      | 71    | 37         | 93      | 100 | 100  | 58     | 100 | 54  | 54  | 68  | 100 |    |
|  | Spain [25]               | 67        | 78        | 59            | 100      | 100     | 100     | 25     | 66  | 99  | 71  | 72 | 31   | 56  | 100     | 87   | 100  | 64      | 62   | 48   | 46  | 64       | 77     | 58   | 79   | 78      | 62    | 24         | 92      | 100 | 100  | 45     | 100 | 57  | 69  | 73  | 100 |    |
|  | Greece [26]              | 67        | 77        | 62            | 100      | 100     | 100     | 47     | 70  | 99  | 69  | 68 | 55   | 71  | 100     | 77   | 100  | 64      | 83   | 44   | 47  | 46       | 65     | 55   | 73   | 85      | 72    | 18         | 83      | 100 | 100  | 55     | 100 | 64  | 63  | 74  | 100 |    |
|  | Portugal [27]            | 65        | 74        | 62            | 100      | 100     | 100     | 63     | 62  | 99  | 63  | 64 | 30   | 51  | 100     | 82   | 100  | 57      | 45   | 43   | 34  | 56       | 64     | 55   | 75   | 68      | 62    | 52         | 82      | 100 | 100  | 35     | 100 | 53  | 70  | 55  | 100 |    |
|  | United States [28]       | 65        | 79        | 62            | 41       | 100     | 100     | 78     | 63  | 98  | 68  | 68 | 36   | 77  | 100     | 85   | 100  | 52      | 49   | 53   | 51  | 99       | 47     | 64   | 74   | 79      | 60    | 47         | 72      | 100 | 100  | 84     | 100 | 76  | 67  | 33  | 31  |    |
|  | Denmark [29]             | 64        | 81        | 58            | 100      | 100     | 100     | 56     | 70  | 99  | 72  | 71 | 44   | 77  | 100     | 83   | 100  | 50      | 28   | 35   | 60  | 73       | 77     | 60   | 71   | 78      | 41    | 14         | 66      | 100 | 100  | 70     | 100 | 63  | 64  | 69  | 100 |    |
|  | Uruguay [30]             | 64        | 68        | 62            | 100      | 78      | 94      | 58     | 52  | 99  | 54  | 53 | 43   | 59  | 100     | 74   | 98   | 46      | 52   | 61   | 54  | 54       | 42     | 56   | 69   | 68      | 48    | 32         | 84      | 90  | 94   | 44     | 97  | 57  | 64  | 49  | 100 |    |
|  | Belgium [31]             | 63        | 81        | 58            | 40       | 100     | 100     | 59     | 65  | 99  | 70  | 71 | 45   | 72  | 100     | 83   | 100  | 57      | 37   | 49   | 49  | 85       | 74     | 60   | 70   | 77      | 57    | 36         | 78      | 100 | 100  | 63     | 100 | 77  | 73  | 64  | 23  |    |
|  | Taiwan [32]              | 63        | 74        | 56            | 100      | 100     | 100     | 53     | 60  | 97  | 72  | 78 | 75   | 56  | 100     | 18   | 59   | 53      | 41   | 73   | 38  | 72       | 67     | 59   | 67   | 64      | 58    | 45         | 96      | 61  | 84   | 38     | 100 | 51  | 45  | 40  | 100 |    |
|  | Seychelles [33]          | 63        | 64        | 62            | 100      | 89      | 89      | 84     | 47  | 81  | 59  | 60 | 100  | 56  | 100     | 32   | 70   | 39      | 44   | 81   | 59  | 56       | 40     | 54   | 59   | 44      | 52    | 67         | 73      | 58  | 72   | 33     | 96  | 63  | 55  | 34  | 100 |    |
|  | Chile [34]               | 62        | 66        | 61            | 100      | 88      | 98      | 51     | 49  | 99  | 58  | 57 | 39   | 51  | 100     | 74   | 85   | 56      | 33   | 59   | 52  | 58       | 43     | 58   | 60   | 51      | 50    | 48         | 71      | 83  | 71   | 52     | 90  | 63  | 52  | 40  | 100 |    |
|  | Barbados [35]            | 62        | 61        | 63            | 100      | 88      | 88      | 65     | 43  | 97  | 52  | 44 | 34   | 67  | 100     | 76   | 100  | 50      | 79   | 71   | 62  | 72       | 49     | 59   | 71   | 58      | 59    | 92         | 73      | 44  | 73   | 29     | 99  | 63  | 53  | 39  | 19  |    |
|  | Slovakia [36]            | 61        | 72        | 57            | 100      | 86      | 85      | 60     | 64  | 99  | 63  | 65 | 79   | 70  | 100     | 67   | 100  | 37      | 41   | 44   | 48  | 48       | 46     | 60   | 46   | 60      | 55    | 38         | 83      | 77  | 93   | 31     | 93  | 68  | 38  | 51  | 100 |    |
|  | Czech Republic [37]      | 61        | 74        | 56            | 100      | 95      | 90      | 60     | 63  | 99  | 67  | 67 | 68   | 69  | 100     | 67   | 100  | 37      | 36   | 43   | 59  | 53       | 41     | 60   | 50   | 75      | 45    | 34         | 60      | 83  | 98   | 41     | 97  | 57  | 37  | 60  | 100 |    |
|  | Dominican [38]           | 61        | 55        | 64            | 100      | 83      | 88      | 78     | 59  | 97  | 53  | 49 | 39   | 56  | 100     | 76   | 85   | 51      | 84   | 64   | 63  | 70       | 41     | 60   | 59   | 49      | 39    | 90         | 73      | 29  | 49   | 25     | 69  | 56  | 56  | 47  | 100 |    |
|  | Mauritius [39]           | 61        | 58        | 61            | 100      | 71      | 52      | 68     | 45  | 97  | 55  | 51 | 54   | 55  | 100     | 32   | 98   | 33      | 48   | 79   | 57  | 42       | 50     | 51   | 50   | 46      | 80    | 54         | 73      | 62  | 67   | 24     | 91  | 62  | 56  | 60  | 100 |    |
|  | The Bahamas [40]         | 61        | 59        | 62            | 100      | 89      | 90      | 64     | 44  | 98  | 48  | 36 | 24   | 52  | 100     | 76   | 100  | 40      | 84   | 60   | 43  | 81       | 41     | 59   | 64   | 52      | 51    | 94         | 73      | 43  | 80   | 35     | 96  | 52  | 54  | 23  | 100 |    |
|  | Montenegro [41]          | 60        | 64        | 59            | 100      | 80      | 82      | 56     | 68  | 99  | 58  | 55 | 75   | 74  | 100     | 66   | 100  | 47      | 54   | 65   | 64  | 17       | 57     | 49   | 47   | 81      | 53    | 48         | 83      | 69  | 87   | 28     | 55  | 62  | 48  | 41  | 100 |    |
|  | Costa Rica [42]          | 60        | 56        | 63            | 100      | 86      | 95      | 61     | 56  | 99  | 57  | 55 | 44   | 60  | 48      | 72   | 79   | 70      | 69   | 70   | 49  | 75       | 32     | 53   | 63   | 56      | 59    | 74         | 64      | 27  | 74   | 35     | 77  | 58  | 51  | 42  | 100 |    |
|  | Jamaica [43]             | 59        | 53        | 62            | 100      | 81      | 86      | 68     | 52  | 94  | 51  | 47 | 33   | 76  | 100     | 76   | 71   | 54      | 99   | 76   | 81  | 66       | 29     | 54   | 58   | 49      | 66    | 73         | 59      | 31  | 51   | 22     | 64  | 50  | 52  | 40  | 100 |    |
|  | Malaysia [44]            | 59        | 56        | 60            | 100      | 58      | 54      | 68     | 42  | 93  | 60  | 63 | 38   | 44  | 41      | 57   | 60   | 48      | 57   | 92   | 38  | 35       | 64     | 51   |      |         |       |            |         |     |      |        |     |     |     |     |     |    |



**Figure 3. Map of health-related SDG index, by quintile, 1990.**

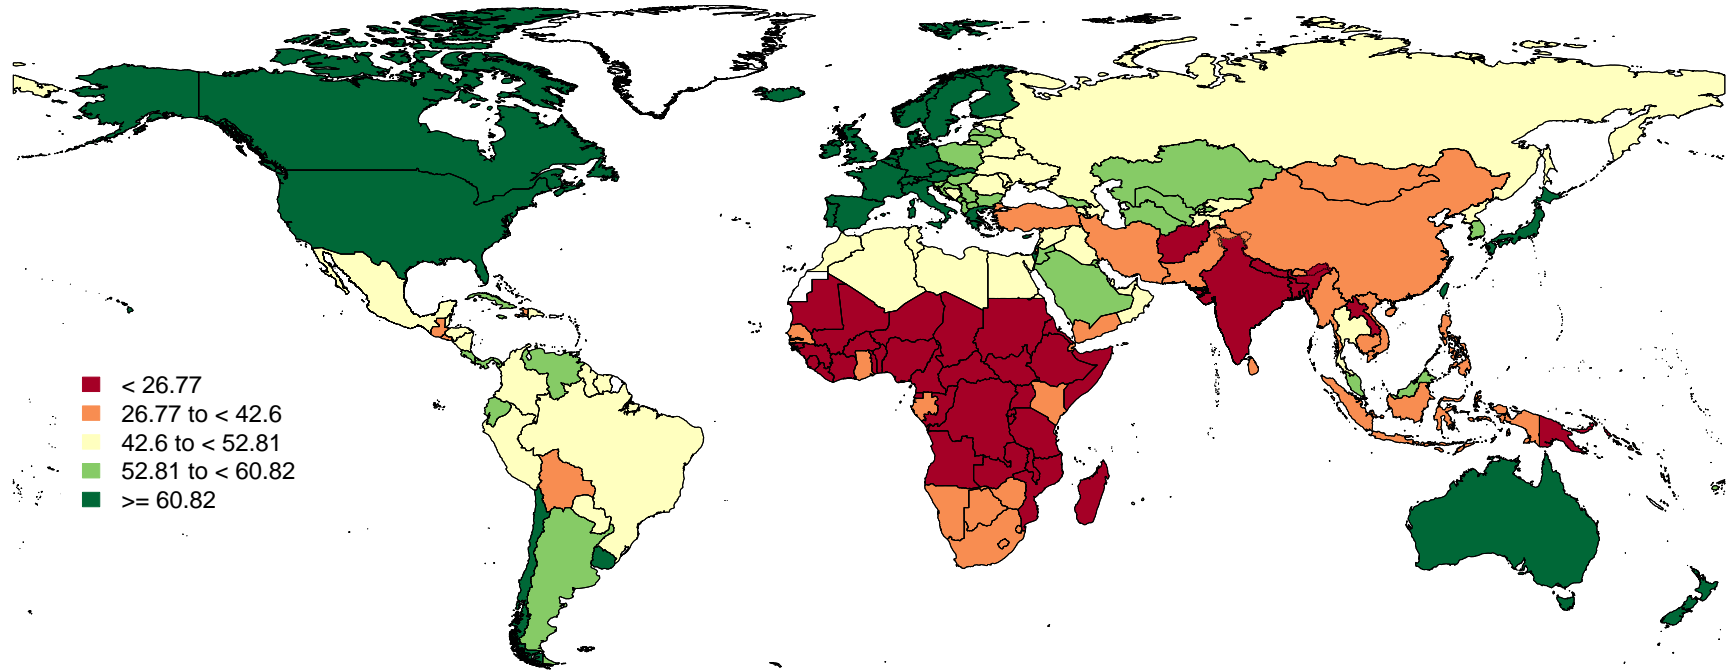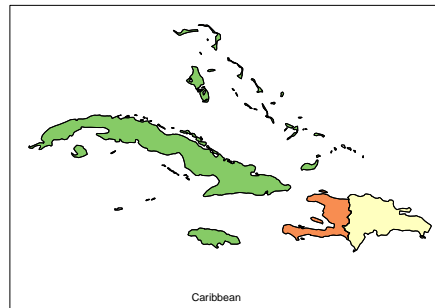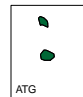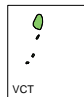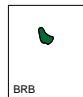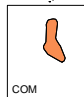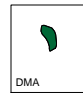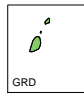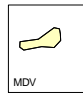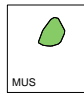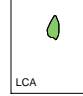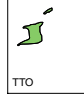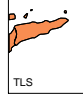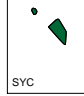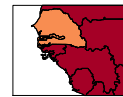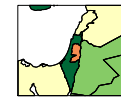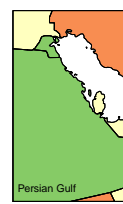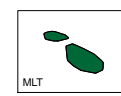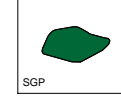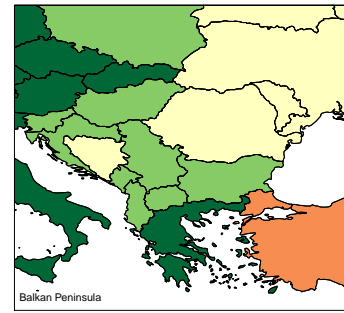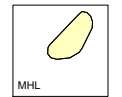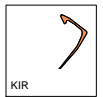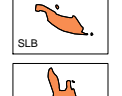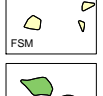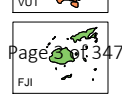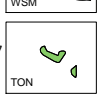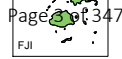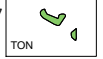

Figure 4. Map of health-related SDG index, by quintile, 2000.

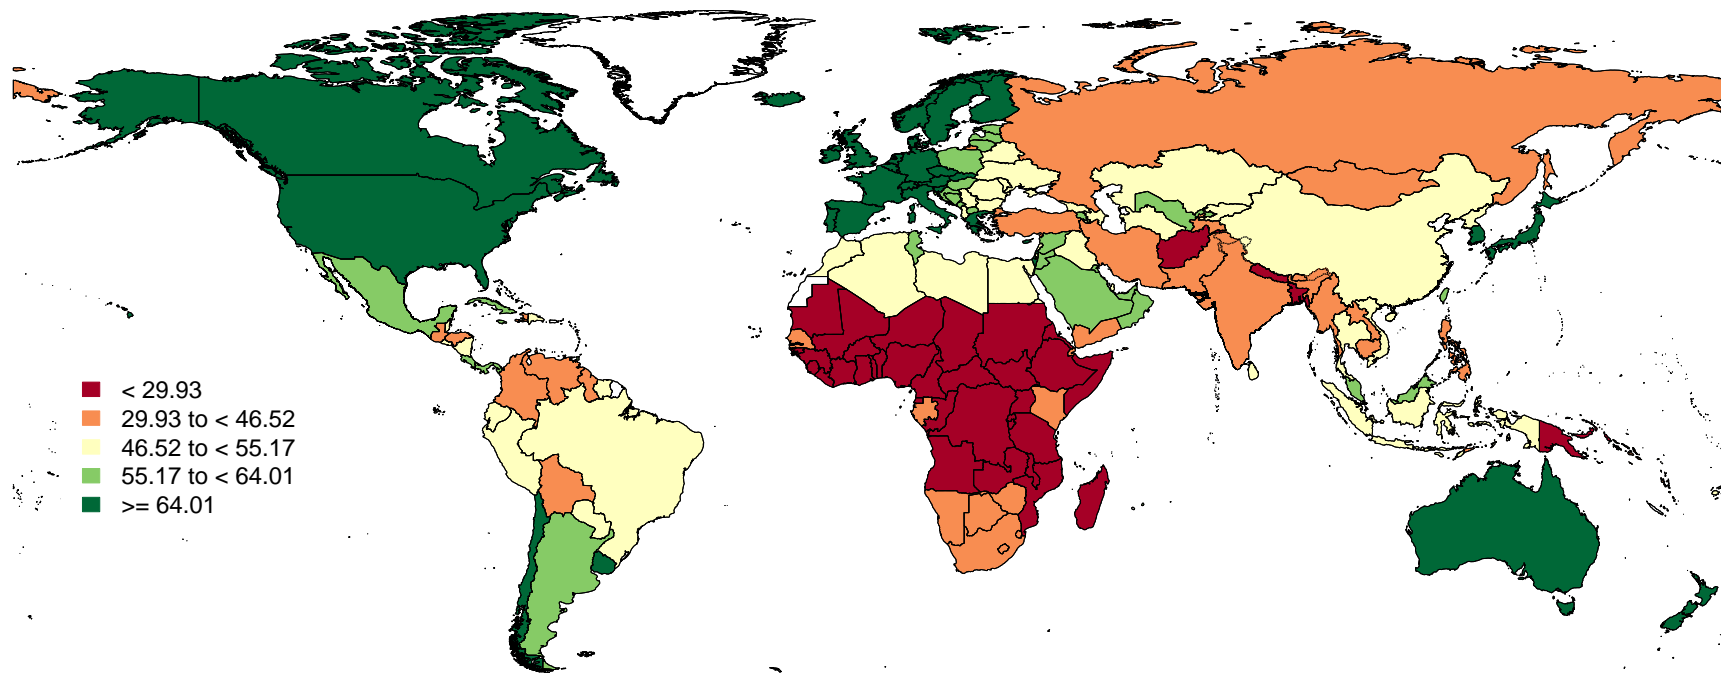

- < 29.93
- 29.93 to < 46.52
- 46.52 to < 55.17
- 55.17 to < 64.01
- >= 64.01

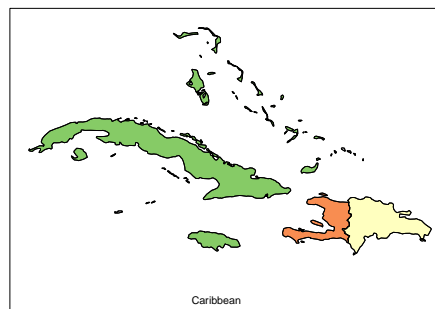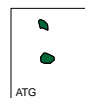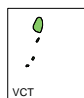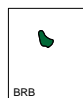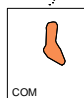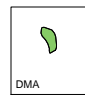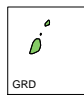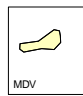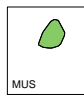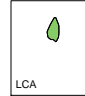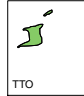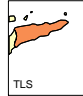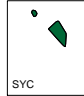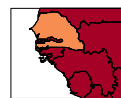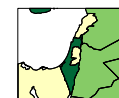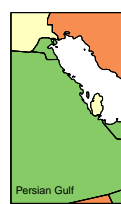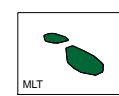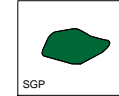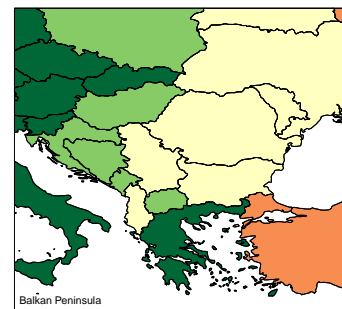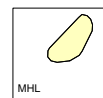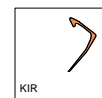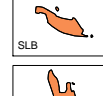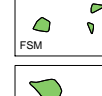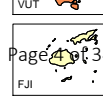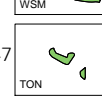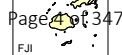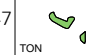

Figure 5. Absolute change in the health-related SDG index, health-related MDG index, health-related non-MDG index, and 33 individual health-related SDG indicators (rescaled), by country from 1990 to 2015.

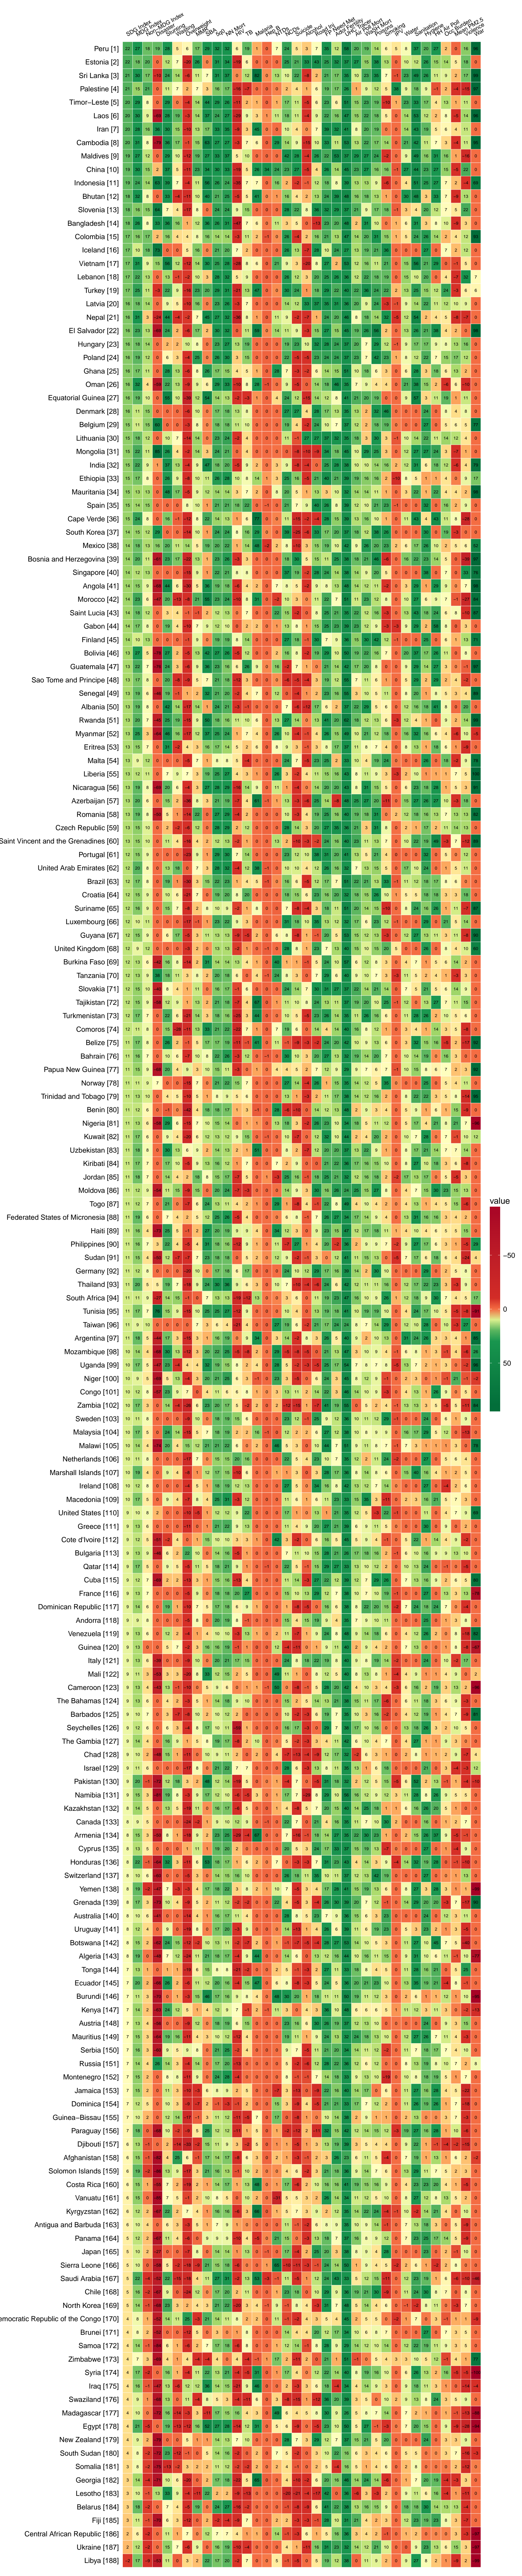

Figure 6. Absolute change in the health-related SDG index, health-related MDG index, health-related non-MDG index, and 33 individual health-related SDG indicators (rescaled), by country from 2000 to 2015.

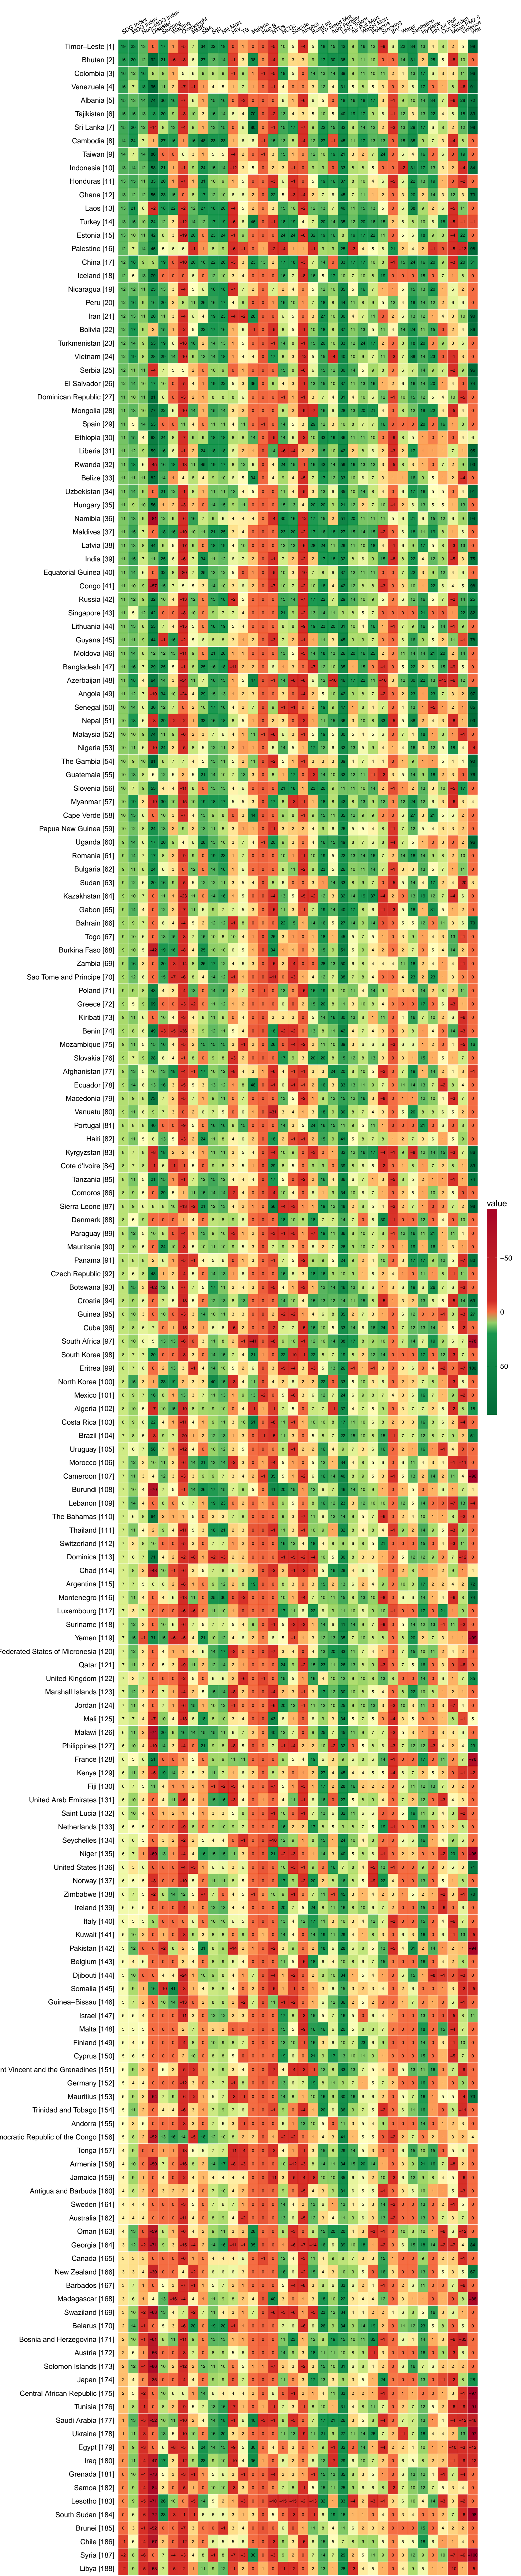

Figure 7a. Comparison of health-related SDG index values using the arithmetic mean of targets versus the geometric mean, in 2015

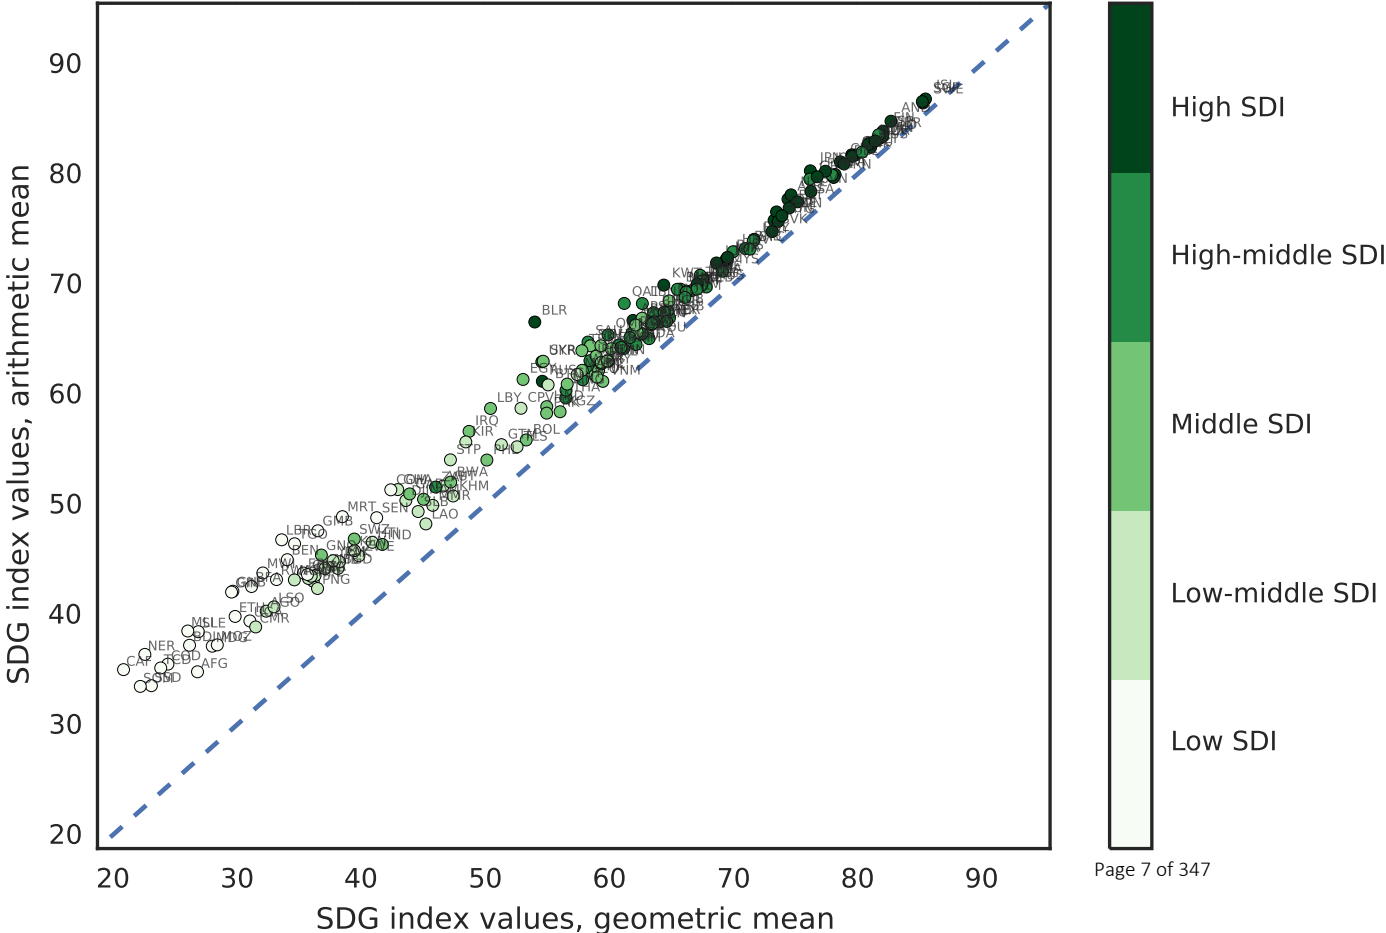

Figure 7b. Comparison of health-related SDG index ranks by country using the arithmetic mean of targets versus the geometric mean, 2015.

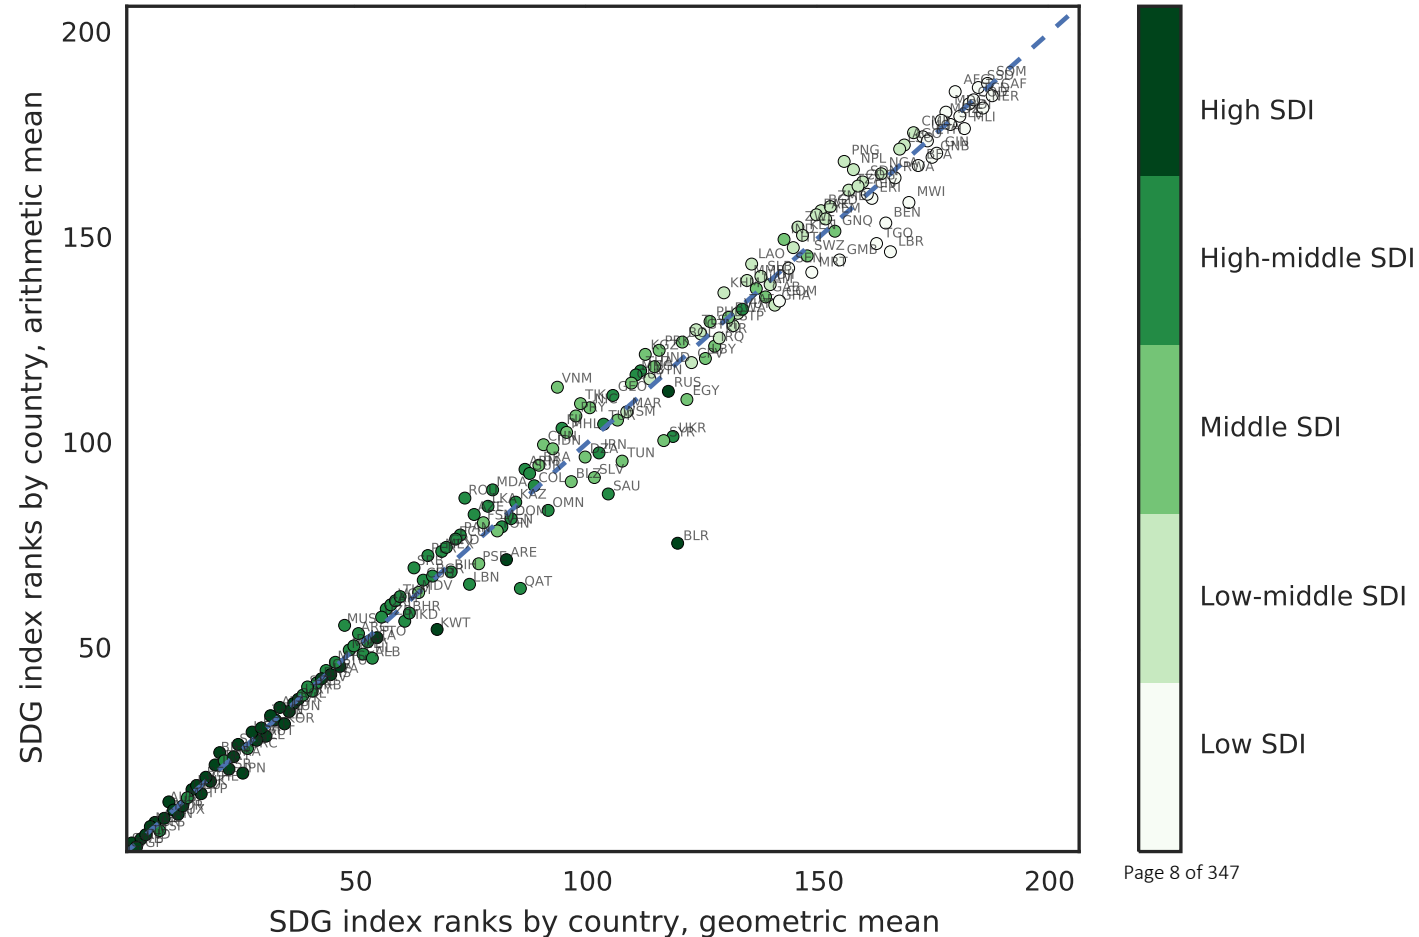

Figure 8a. Comparison of health-related SDG index values using the geometric mean of the minimums across each target versus the standard geometric mean, in 2015

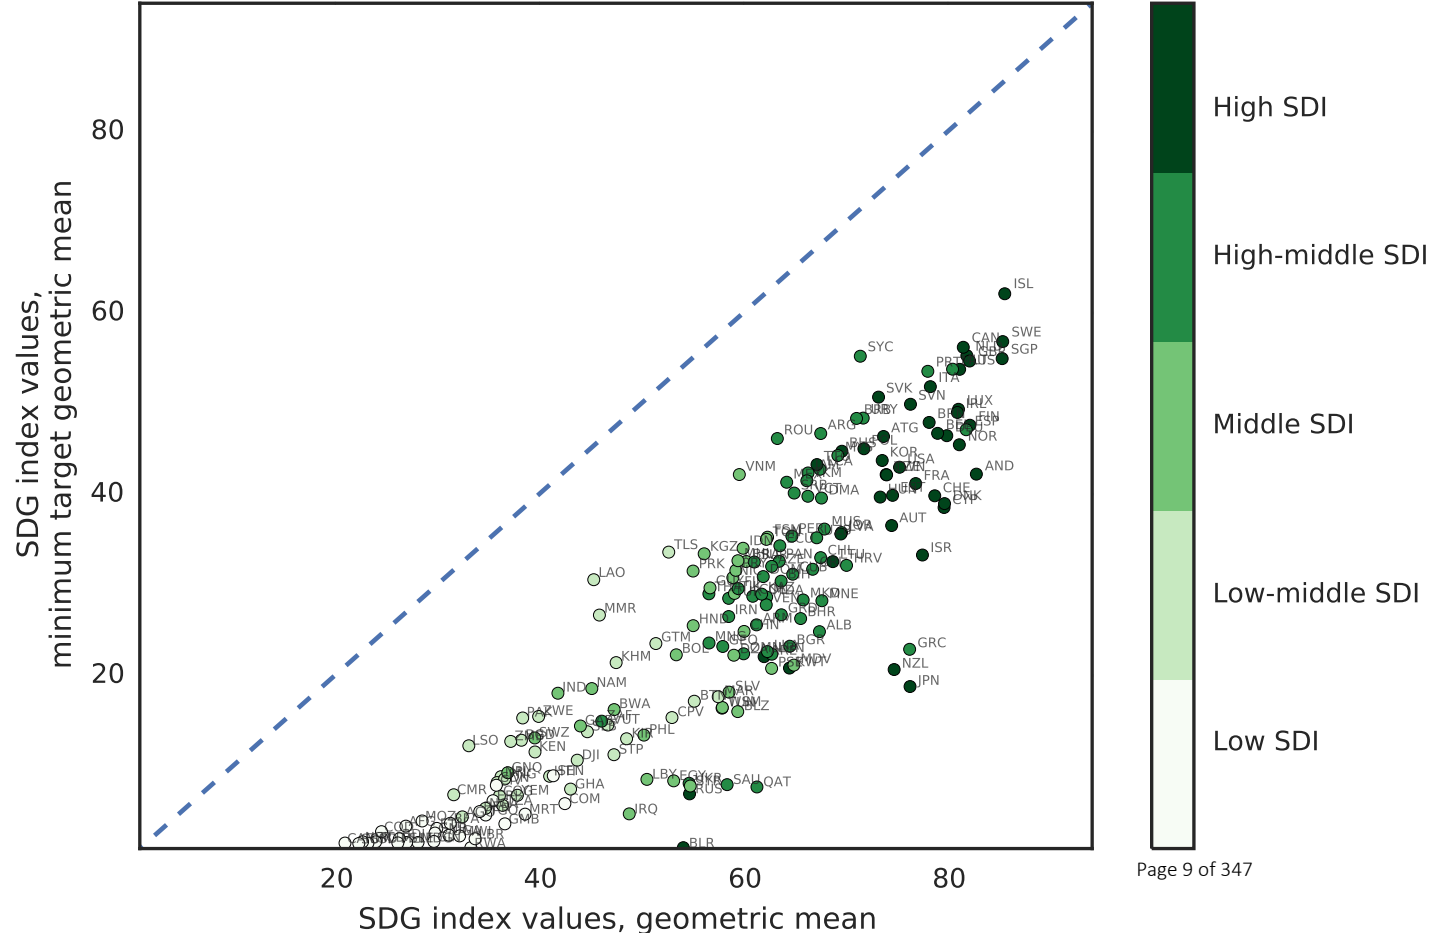

Figure 8b. Comparison of health-related SDG index ranks by country using the geometric mean of the minimums across each target versus the standard geometric mean, in 2015

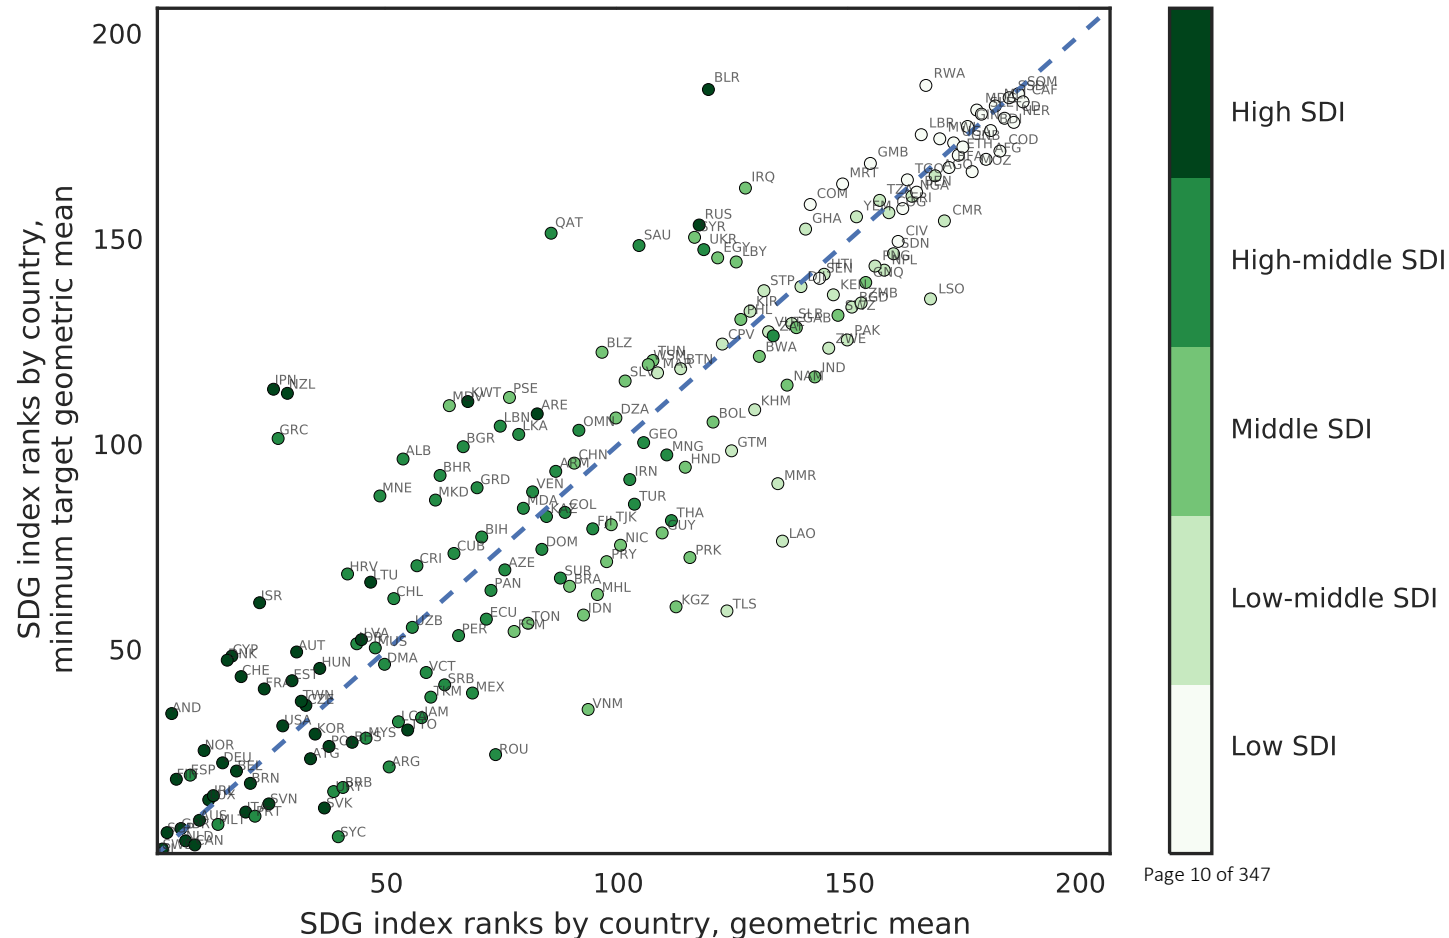

**Figure 9. Map of observed health-related SDG index minus expected health-related SDG index, on the basis of SDI alone, in 1990.**

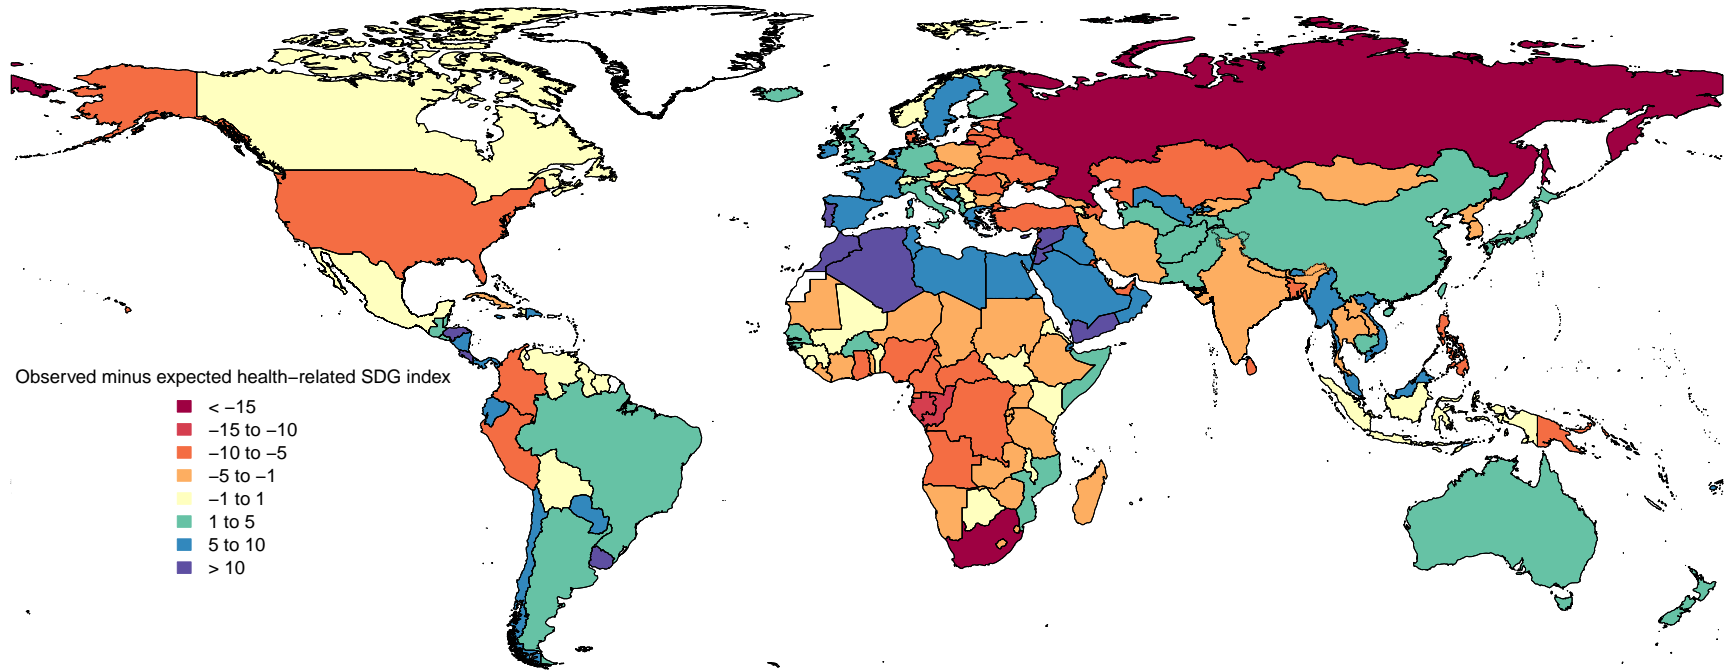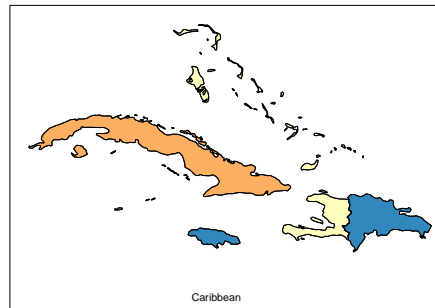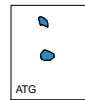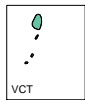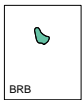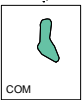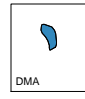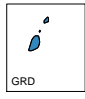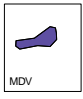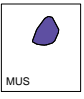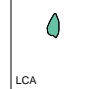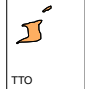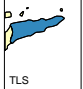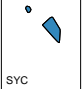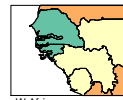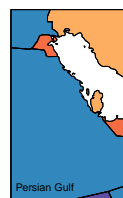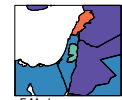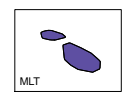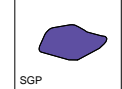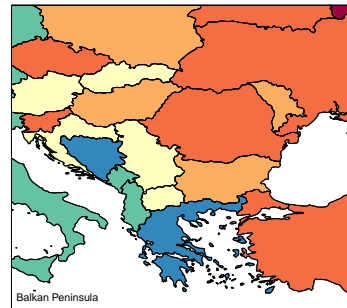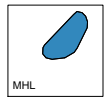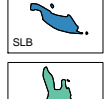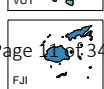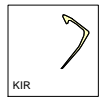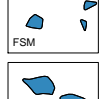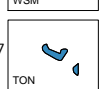

**Figure 10. Map of observed health-related SDG index minus expected health-related SDG index, on the basis of SDI alone, in 2000.**

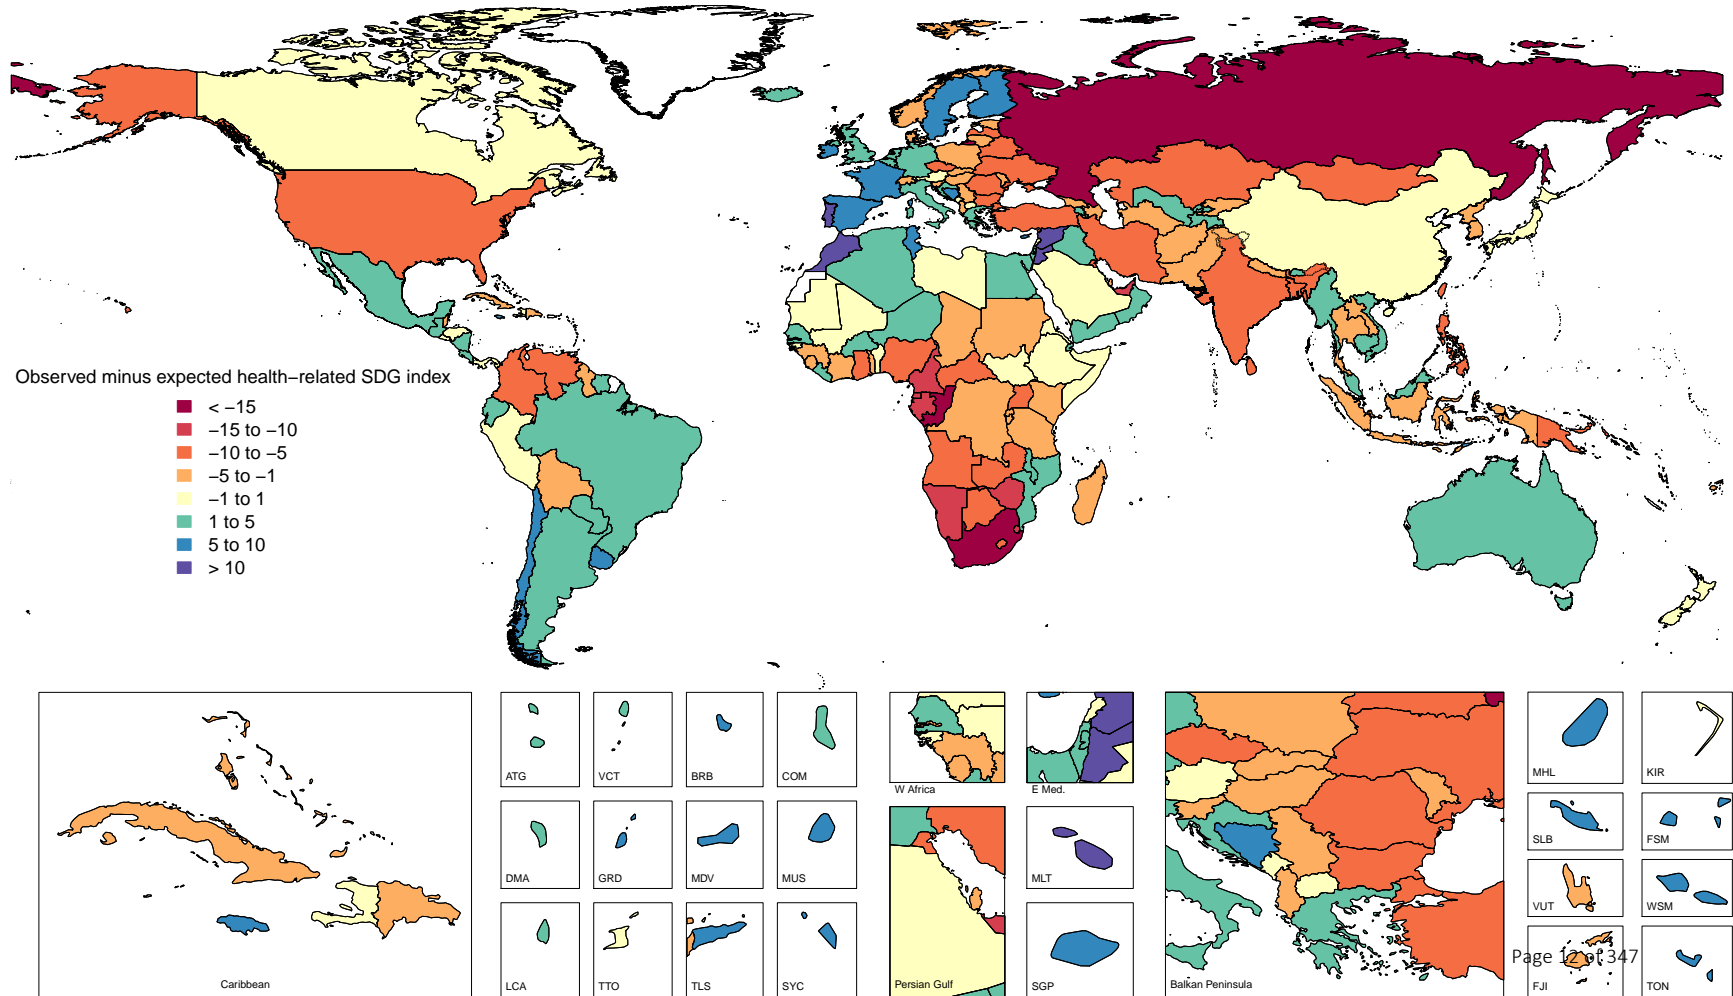

**Table 1a. Scaled values for each SDG health-related indicator and three summary indicators by country for 1990, 2000, and 2015**

| Location      | Geometric mean of all indicators |                        |                        | Geometric mean of all indicators with corresponding MDG indicator |                        |                        | Geometric mean of all indicators without corresponding MDG indicator |                        |                        | Indicator 1.5.1: Age-standardised death rate due to exposure to forces of nature (per 100,000 population) |                           |                           |
|---------------|----------------------------------|------------------------|------------------------|-------------------------------------------------------------------|------------------------|------------------------|----------------------------------------------------------------------|------------------------|------------------------|-----------------------------------------------------------------------------------------------------------|---------------------------|---------------------------|
|               | 1990                             | 2000                   | 2015                   | 1990                                                              | 2000                   | 2015                   | 1990                                                                 | 2000                   | 2015                   | 1990                                                                                                      | 2000                      | 2015                      |
| Canada        | 73.12<br>(72.22-74.03)           | 77.96<br>(76.94-78.92) | 81.40<br>(80.19-82.33) | 82.28<br>(81.67-82.90)                                            | 88.18<br>(87.55-88.87) | 91.12<br>(90.28-92.02) | 69.52<br>(67.93-71.07)                                               | 71.96<br>(69.19-74.06) | 74.57<br>(71.02-77.01) | 100.00<br>(100.00-100.00)                                                                                 | 100.00<br>(100.00-100.00) | 100.00<br>(100.00-100.00) |
| United States | 65.42<br>(63.75-66.71)           | 69.24<br>(67.56-70.55) | 74.92<br>(73.63-75.95) | 78.93<br>(78.44-79.46)                                            | 85.22<br>(84.68-85.76) | 88.44<br>(87.92-88.95) | 62.24<br>(60.06-63.98)                                               | 64.37<br>(62.16-66.03) | 70.28<br>(68.56-71.66) | 41.42<br>(32.28-49.77)                                                                                    | 43.33<br>(34.29-50.11)    | 42.97<br>(33.96-50.09)    |
| Australia     | 73.17<br>(72.35-74.02)           | 76.72<br>(75.66-77.73) | 80.93<br>(79.75-81.92) | 82.22<br>(81.54-82.89)                                            | 88.30<br>(87.59-89.00) | 91.85<br>(91.17-92.44) | 70.26<br>(69.03-71.48)                                               | 72.31<br>(70.86-73.61) | 75.85<br>(73.84-77.49) | 100.00<br>(100.00-100.00)                                                                                 | 58.70<br>(47.17-68.78)    | 58.85<br>(47.32-68.36)    |
| New Zealand   | 70.75<br>(69.73-71.73)           | 71.07<br>(69.56-72.57) | 74.42<br>(73.25-75.52) | 80.20<br>(79.60-80.87)                                            | 86.67<br>(85.98-87.35) | 89.60<br>(88.91-90.30) | 66.41<br>(64.37-68.26)                                               | 64.41<br>(61.93-66.60) | 67.98<br>(66.04-69.67) | 100.00<br>(100.00-100.00)                                                                                 | 51.07<br>(41.40-60.65)    | 20.65<br>(17.44-24.00)    |
| Brunei        | 73.56<br>(72.36-74.63)           | 78.03<br>(77.03-79.03) | 78.00<br>(76.81-79.30) | 76.68<br>(75.72-77.56)                                            | 81.77<br>(80.56-82.71) | 84.53<br>(83.74-85.27) | 73.03<br>(71.42-74.58)                                               | 76.56<br>(75.10-77.87) | 75.30<br>(73.43-77.16) | 100.00<br>(100.00-100.00)                                                                                 | 100.00<br>(100.00-100.00) | 47.92<br>(40.48-58.36)    |
| Japan         | 70.54<br>(68.89-72.31)           | 74.16<br>(72.18-75.89) | 75.71<br>(73.57-78.87) | 82.06<br>(81.04-82.94)                                            | 88.26<br>(87.31-89.14) | 92.37<br>(91.77-92.88) | 67.37<br>(65.28-69.80)                                               | 69.45<br>(66.96-71.58) | 69.85<br>(67.15-73.93) | 45.93<br>(31.98-70.15)                                                                                    | 54.10<br>(40.64-68.62)    | 18.78<br>(10.87-38.67)    |
| Singapore     | 71.09<br>(69.71-72.80)           | 74.51<br>(72.88-76.64) | 85.26<br>(84.06-86.34) | 79.26<br>(78.28-80.19)                                            | 86.44<br>(85.68-87.17) | 91.75<br>(91.18-92.26) | 67.53<br>(65.64-69.67)                                               | 68.95<br>(66.75-71.70) | 80.51<br>(78.66-82.25) | 100.00<br>(100.00-100.00)                                                                                 | 57.59<br>(50.70-67.10)    | 100.00<br>(100.00-100.00) |
| South Korea   | 58.74<br>(57.14-60.46)           | 65.54<br>(64.01-67.16) | 73.24<br>(72.06-74.62) | 75.49<br>(74.32-76.62)                                            | 82.78<br>(81.03-83.86) | 90.11<br>(89.50-90.75) | 52.88<br>(50.90-55.04)                                               | 58.63<br>(56.71-60.60) | 65.30<br>(63.33-67.25) | 26.56<br>(19.80-36.99)                                                                                    | 35.67<br>(28.26-46.66)    | 56.02<br>(49.00-65.64)    |
| Andorra       | 73.47<br>(71.78-75.29)           | 77.77<br>(76.29-79.32) | 82.59<br>(81.16-84.06) | 83.02<br>(80.38-84.34)                                            | 89.64<br>(88.55-90.63) | 92.43<br>(91.13-93.62) | 69.45<br>(66.90-72.12)                                               | 72.19<br>(69.76-74.59) | 77.24<br>(74.65-79.62) | 100.00<br>(100.00-100.00)                                                                                 | 100.00<br>(100.00-100.00) | 100.00<br>(100.00-100.00) |
| Austria       | 67.07<br>(65.93-68.19)           | 72.24<br>(71.10-73.27) | 74.12<br>(72.56-75.49) | 78.51<br>(77.41-79.53)                                            | 86.47<br>(85.55-87.34) | 91.55<br>(90.77-92.30) | 62.82<br>(60.76-64.73)                                               | 65.82<br>(63.40-67.72) | 66.37<br>(63.62-68.68) | 100.00<br>(100.00-100.00)                                                                                 | 100.00<br>(100.00-100.00) | 43.55<br>(36.16-51.06)    |
| Belgium       | 63.48<br>(62.17-65.05)           | 73.46<br>(72.36-74.48) | 78.73<br>(77.58-79.79) | 81.03<br>(80.31-81.70)                                            | 87.64<br>(86.84-88.33) | 91.66<br>(91.02-92.30) | 57.52<br>(55.45-59.58)                                               | 67.22<br>(64.99-69.01) | 72.78<br>(70.61-74.59) | 40.44<br>(33.52-48.23)                                                                                    | 100.00<br>(100.00-100.00) | 100.00<br>(100.00-100.00) |

**Table 1a. Scaled values for each SDG health-related indicator and three summary indicators by country for 1990, 2000, and 2015**

| Location   | Geometric mean of all indicators |                        |                        | Geometric mean of all indicators with corresponding MDG indicator |                        |                        | Geometric mean of all indicators without corresponding MDG indicator |                        |                        | Indicator 1.5.1: Age-standardised death rate due to exposure to forces of nature (per 100,000 population) |                           |                           |
|------------|----------------------------------|------------------------|------------------------|-------------------------------------------------------------------|------------------------|------------------------|----------------------------------------------------------------------|------------------------|------------------------|-----------------------------------------------------------------------------------------------------------|---------------------------|---------------------------|
|            | 1990                             | 2000                   | 2015                   | 1990                                                              | 2000                   | 2015                   | 1990                                                                 | 2000                   | 2015                   | 1990                                                                                                      | 2000                      | 2015                      |
| Cyprus     | 71.20<br>(70.11-72.31)           | 74.27<br>(73.16-75.26) | 79.37<br>(78.14-80.46) | 79.45<br>(78.45-80.40)                                            | 86.55<br>(85.60-87.44) | 92.08<br>(91.16-93.20) | 67.86<br>(65.59-69.89)                                               | 68.76<br>(66.50-70.56) | 73.28<br>(70.91-75.20) | 100.00<br>(100.00-100.00)                                                                                 | 100.00<br>(100.00-100.00) | 100.00<br>(100.00-100.00) |
| Denmark    | 63.89<br>(62.17-65.50)           | 71.21<br>(69.99-72.30) | 79.40<br>(78.03-80.75) | 81.01<br>(80.21-81.83)                                            | 87.36<br>(86.49-88.20) | 92.36<br>(91.54-93.14) | 58.12<br>(55.64-60.53)                                               | 64.48<br>(61.87-66.40) | 73.03<br>(70.12-75.37) | 100.00<br>(100.00-100.00)                                                                                 | 100.00<br>(100.00-100.00) | 100.00<br>(100.00-100.00) |
| Finland    | 68.40<br>(67.18-69.71)           | 76.72<br>(75.80-77.59) | 81.91<br>(80.77-82.87) | 83.96<br>(83.36-84.62)                                            | 89.87<br>(89.20-90.57) | 94.31<br>(93.54-95.02) | 62.69<br>(60.75-64.65)                                               | 71.09<br>(69.40-72.62) | 75.90<br>(73.51-77.68) | 100.00<br>(100.00-100.00)                                                                                 | 100.00<br>(100.00-100.00) | 100.00<br>(100.00-100.00) |
| France     | 67.22<br>(66.07-68.50)           | 70.38<br>(69.18-71.65) | 76.52<br>(75.31-77.78) | 78.89<br>(78.23-79.53)                                            | 86.92<br>(86.28-87.57) | 91.54<br>(90.82-92.16) | 62.73<br>(60.90-64.53)                                               | 63.54<br>(61.41-65.51) | 69.96<br>(67.60-71.93) | 100.00<br>(100.00-100.00)                                                                                 | 49.50<br>(40.41-58.09)    | 100.00<br>(100.00-100.00) |
| Germany    | 69.06<br>(68.04-70.00)           | 74.74<br>(73.74-75.67) | 79.67<br>(78.47-80.68) | 79.77<br>(79.02-80.53)                                            | 88.02<br>(87.34-88.74) | 91.88<br>(91.22-92.52) | 65.40<br>(63.80-66.91)                                               | 69.06<br>(67.11-70.64) | 73.25<br>(70.25-75.33) | 100.00<br>(100.00-100.00)                                                                                 | 100.00<br>(100.00-100.00) | 100.00<br>(100.00-100.00) |
| Greece     | 66.54<br>(65.04-67.89)           | 67.02<br>(65.37-68.52) | 75.96<br>(74.23-77.44) | 77.16<br>(75.76-78.34)                                            | 85.33<br>(84.20-86.34) | 90.52<br>(89.74-91.19) | 62.08<br>(59.42-64.31)                                               | 59.24<br>(56.00-61.73) | 68.16<br>(63.89-71.04) | 100.00<br>(100.00-100.00)                                                                                 | 31.39<br>(26.65-36.39)    | 100.00<br>(100.00-100.00) |
| Iceland    | 68.24<br>(66.72-70.24)           | 73.35<br>(72.08-74.37) | 85.50<br>(84.15-86.54) | 82.87<br>(82.15-83.55)                                            | 88.25<br>(87.46-88.96) | 93.35<br>(92.57-94.17) | 61.20<br>(57.85-64.23)                                               | 66.01<br>(62.98-68.17) | 79.26<br>(75.79-81.88) | 26.79<br>(20.18-40.77)                                                                                    | 20.96<br>(17.92-23.78)    | 100.00<br>(100.00-100.00) |
| Ireland    | 71.04<br>(70.02-71.97)           | 75.07<br>(74.18-75.94) | 80.73<br>(79.55-81.74) | 80.04<br>(79.26-80.77)                                            | 86.46<br>(85.77-87.17) | 92.00<br>(91.46-92.52) | 67.21<br>(64.90-68.93)                                               | 69.93<br>(68.26-71.30) | 74.75<br>(72.00-76.83) | 100.00<br>(100.00-100.00)                                                                                 | 100.00<br>(100.00-100.00) | 100.00<br>(100.00-100.00) |
| Israel     | 68.61<br>(67.47-69.76)           | 72.00<br>(70.97-73.00) | 77.21<br>(75.97-78.39) | 80.52<br>(79.82-81.21)                                            | 86.05<br>(85.30-86.80) | 91.13<br>(90.50-91.78) | 64.78<br>(62.83-66.42)                                               | 66.54<br>(64.37-68.40) | 70.46<br>(67.56-72.77) | 100.00<br>(100.00-100.00)                                                                                 | 100.00<br>(100.00-100.00) | 100.00<br>(100.00-100.00) |
| Italy      | 69.06<br>(67.96-70.19)           | 72.48<br>(71.12-73.70) | 78.03<br>(76.55-79.38) | 79.04<br>(77.84-80.18)                                            | 87.63<br>(86.78-88.54) | 92.25<br>(91.43-92.98) | 64.55<br>(62.19-66.55)                                               | 64.81<br>(61.71-67.25) | 70.18<br>(66.48-72.94) | 100.00<br>(100.00-100.00)                                                                                 | 52.03<br>(42.31-60.97)    | 61.29<br>(49.16-70.99)    |
| Luxembourg | 68.77<br>(67.68-69.95)           | 74.13<br>(73.08-75.18) | 80.87<br>(79.57-81.93) | 81.60<br>(80.82-82.40)                                            | 88.04<br>(87.25-88.84) | 91.41<br>(90.64-92.15) | 63.90<br>(62.02-65.70)                                               | 67.69<br>(65.51-69.49) | 74.73<br>(71.78-76.94) | 100.00<br>(100.00-100.00)                                                                                 | 100.00<br>(100.00-100.00) | 100.00<br>(100.00-100.00) |

**Appendix Table 1a. Scaled values for each SDG health-related indicator and three summary indicators by country for 1990, 2000, and 2015**

| Location       | Geometric mean of all indicators |                        |                        | Geometric mean of all indicators with corresponding MDG indicator |                        |                        | Geometric mean of all indicators without corresponding MDG indicator |                        |                        | Indicator 1.5.1: Age-standardised death rate due to exposure to forces of nature (per 100,000 population) |                           |                           |
|----------------|----------------------------------|------------------------|------------------------|-------------------------------------------------------------------|------------------------|------------------------|----------------------------------------------------------------------|------------------------|------------------------|-----------------------------------------------------------------------------------------------------------|---------------------------|---------------------------|
|                | 1990                             | 2000                   | 2015                   | 1990                                                              | 2000                   | 2015                   | 1990                                                                 | 2000                   | 2015                   | 1990                                                                                                      | 2000                      | 2015                      |
| Malta          | 67.62<br>(65.98-69.53)           | 75.17<br>(73.64-76.40) | 80.38<br>(78.87-81.79) | 78.37<br>(77.28-79.42)                                            | 81.93<br>(80.87-82.96) | 87.18<br>(86.37-87.97) | 61.95<br>(58.74-65.07)                                               | 69.47<br>(65.18-72.35) | 74.45<br>(70.10-77.47) | 100.00<br>(100.00-100.00)                                                                                 | 100.00<br>(100.00-100.00) | 100.00<br>(100.00-100.00) |
| Netherlands    | 71.85<br>(70.79-72.89)           | 75.78<br>(74.80-76.71) | 81.66<br>(80.59-82.64) | 81.62<br>(80.86-82.31)                                            | 87.62<br>(86.87-88.33) | 92.42<br>(91.79-93.01) | 68.33<br>(66.68-69.81)                                               | 70.79<br>(69.11-72.38) | 76.19<br>(73.96-78.06) | 100.00<br>(100.00-100.00)                                                                                 | 100.00<br>(100.00-100.00) | 100.00<br>(100.00-100.00) |
| Norway         | 69.54<br>(68.23-70.69)           | 75.21<br>(74.02-76.24) | 80.88<br>(79.52-82.01) | 82.69<br>(82.01-83.37)                                            | 88.35<br>(87.56-89.06) | 93.55<br>(92.91-94.12) | 64.93<br>(62.97-66.59)                                               | 69.75<br>(67.67-71.51) | 74.33<br>(71.53-76.49) | 38.39<br>(32.45-44.01)                                                                                    | 48.14<br>(39.57-55.86)    | 45.46<br>(37.48-53.62)    |
| Portugal       | 65.45<br>(64.32-66.66)           | 69.40<br>(68.15-70.58) | 77.89<br>(76.57-79.01) | 73.76<br>(72.56-74.79)                                            | 81.39<br>(80.37-82.39) | 89.03<br>(88.15-89.90) | 61.67<br>(59.79-63.63)                                               | 62.93<br>(60.30-65.05) | 70.46<br>(66.96-72.80) | 100.00<br>(100.00-100.00)                                                                                 | 60.27<br>(48.40-69.21)    | 100.00<br>(100.00-100.00) |
| Spain          | 66.90<br>(64.22-68.41)           | 70.29<br>(67.46-71.88) | 81.69<br>(80.13-82.81) | 77.55<br>(76.48-78.54)                                            | 86.86<br>(86.13-87.55) | 91.57<br>(90.86-92.17) | 59.43<br>(51.30-63.02)                                               | 60.06<br>(51.58-63.83) | 74.00<br>(68.91-77.00) | 100.00<br>(100.00-100.00)                                                                                 | 46.89<br>(38.57-54.87)    | 100.00<br>(100.00-100.00) |
| Sweden         | 75.22<br>(74.27-76.11)           | 81.03<br>(80.09-81.88) | 85.26<br>(84.16-86.21) | 82.66<br>(81.98-83.31)                                            | 89.79<br>(89.10-90.50) | 93.54<br>(92.92-94.10) | 72.13<br>(70.11-73.74)                                               | 76.22<br>(73.94-78.12) | 80.10<br>(77.35-82.08) | 100.00<br>(100.00-100.00)                                                                                 | 100.00<br>(100.00-100.00) | 100.00<br>(100.00-100.00) |
| Switzerland    | 70.35<br>(69.41-71.34)           | 71.34<br>(70.17-72.47) | 78.41<br>(77.20-79.65) | 82.14<br>(81.40-82.88)                                            | 89.25<br>(88.54-89.95) | 92.47<br>(91.69-93.25) | 65.82<br>(64.16-67.34)                                               | 64.65<br>(62.87-66.27) | 72.24<br>(70.18-74.16) | 100.00<br>(100.00-100.00)                                                                                 | 30.26<br>(25.63-35.23)    | 39.83<br>(33.28-46.46)    |
| United Kingdom | 70.04<br>(68.53-71.56)           | 75.36<br>(73.98-76.61) | 81.97<br>(80.86-83.01) | 81.05<br>(80.48-81.61)                                            | 86.41<br>(85.91-86.91) | 89.89<br>(89.42-90.36) | 66.46<br>(64.34-68.63)                                               | 71.13<br>(69.29-72.79) | 78.25<br>(76.58-79.80) | 100.00<br>(100.00-100.00)                                                                                 | 100.00<br>(100.00-100.00) | 100.00<br>(100.00-100.00) |
| Argentina      | 56.79<br>(55.35-58.48)           | 60.43<br>(58.61-62.53) | 67.31<br>(65.18-68.78) | 58.51<br>(56.13-60.64)                                            | 69.34<br>(67.93-70.55) | 76.83<br>(75.48-77.98) | 56.29<br>(53.38-58.90)                                               | 56.05<br>(51.80-59.40) | 61.36<br>(54.93-64.65) | 100.00<br>(100.00-100.00)                                                                                 | 49.93<br>(42.57-60.19)    | 56.41<br>(49.42-66.00)    |
| Chile          | 62.48<br>(61.40-63.58)           | 67.88<br>(66.54-69.02) | 67.14<br>(64.22-68.98) | 66.21<br>(64.70-67.59)                                            | 76.96<br>(75.99-77.85) | 82.03<br>(81.24-82.76) | 60.78<br>(58.57-62.74)                                               | 62.68<br>(59.00-65.10) | 58.94<br>(47.80-62.87) | 100.00<br>(100.00-100.00)                                                                                 | 100.00<br>(100.00-100.00) | 33.00<br>(25.72-43.93)    |
| Uruguay        | 63.81<br>(62.68-64.97)           | 64.23<br>(63.02-65.53) | 71.54<br>(70.08-72.67) | 68.16<br>(66.53-69.59)                                            | 74.88<br>(73.71-75.96) | 80.44<br>(79.26-81.45) | 62.36<br>(60.32-64.16)                                               | 59.53<br>(56.97-61.57) | 66.05<br>(61.64-68.64) | 100.00<br>(100.00-100.00)                                                                                 | 41.62<br>(34.09-52.48)    | 100.00<br>(100.00-100.00) |

**Appendix Table 1a. Scaled values for each SDG health-related indicator and three summary indicators by country for 1990, 2000, and 2015**

| Location               | Geometric mean of all indicators |                        |                        | Geometric mean of all indicators with corresponding MDG indicator |                        |                        | Geometric mean of all indicators without corresponding MDG indicator |                        |                        | Indicator 1.5.1: Age-standardised death rate due to exposure to forces of nature (per 100,000 population) |                           |                           |
|------------------------|----------------------------------|------------------------|------------------------|-------------------------------------------------------------------|------------------------|------------------------|----------------------------------------------------------------------|------------------------|------------------------|-----------------------------------------------------------------------------------------------------------|---------------------------|---------------------------|
|                        | 1990                             | 2000                   | 2015                   | 1990                                                              | 2000                   | 2015                   | 1990                                                                 | 2000                   | 2015                   | 1990                                                                                                      | 2000                      | 2015                      |
| Belarus                | 50.31<br>(48.79-51.78)           | 51.08<br>(49.31-52.88) | 53.48<br>(52.23-54.76) | 63.41<br>(60.74-65.92)                                            | 67.75<br>(66.61-68.87) | 81.60<br>(80.28-82.76) | 46.42<br>(44.48-48.32)                                               | 45.92<br>(43.58-48.32) | 44.70<br>(43.05-46.35) | 100.00<br>(100.00-100.00)                                                                                 | 100.00<br>(100.00-100.00) | 100.00<br>(100.00-100.00) |
| Estonia                | 52.51<br>(48.74-54.98)           | 61.79<br>(60.35-63.37) | 74.44<br>(73.18-75.59) | 67.40<br>(64.84-69.48)                                            | 75.07<br>(73.28-76.39) | 85.27<br>(83.54-86.57) | 47.86<br>(43.30-50.98)                                               | 56.39<br>(54.19-58.43) | 67.57<br>(65.36-69.59) | 100.00<br>(100.00-100.00)                                                                                 | 58.20<br>(44.90-79.26)    | 100.00<br>(100.00-100.00) |
| Latvia                 | 52.87<br>(51.20-54.62)           | 58.32<br>(56.87-59.95) | 69.27<br>(67.98-70.48) | 64.34<br>(61.82-66.45)                                            | 69.52<br>(67.66-71.13) | 82.13<br>(80.25-83.74) | 49.24<br>(47.06-51.44)                                               | 54.27<br>(52.13-56.46) | 62.74<br>(60.75-64.60) | 100.00<br>(100.00-100.00)                                                                                 | 56.21<br>(43.23-77.38)    | 100.00<br>(100.00-100.00) |
| Lithuania              | 53.22<br>(51.51-54.93)           | 57.72<br>(55.94-59.68) | 68.43<br>(67.18-69.74) | 64.49<br>(61.42-66.85)                                            | 69.44<br>(66.62-71.50) | 82.38<br>(80.23-83.94) | 49.90<br>(47.92-52.04)                                               | 53.74<br>(51.47-56.28) | 61.81<br>(59.86-63.62) | 100.00<br>(100.00-100.00)                                                                                 | 47.27<br>(36.21-67.71)    | 100.00<br>(100.00-100.00) |
| Moldova                | 51.07<br>(49.07-53.05)           | 51.37<br>(49.91-52.76) | 62.02<br>(60.05-63.81) | 57.05<br>(52.47-60.70)                                            | 55.37<br>(53.05-57.46) | 69.16<br>(65.41-72.74) | 49.41<br>(46.91-51.78)                                               | 50.38<br>(48.24-52.27) | 58.43<br>(56.20-60.56) | 100.00<br>(100.00-100.00)                                                                                 | 34.15<br>(29.26-38.67)    | 46.38<br>(41.09-52.96)    |
| Russia                 | 46.75<br>(44.54-48.98)           | 43.01<br>(40.85-45.48) | 53.79<br>(48.87-56.96) | 61.22<br>(58.47-63.53)                                            | 63.74<br>(62.20-65.19) | 75.36<br>(73.13-77.18) | 42.25<br>(39.57-44.88)                                               | 37.15<br>(34.57-39.97) | 45.98<br>(40.42-49.96) | 31.07<br>(23.92-41.89)                                                                                    | 24.85<br>(18.28-35.06)    | 57.22<br>(50.30-66.76)    |
| Ukraine                | 52.33<br>(50.89-53.83)           | 53.11<br>(51.81-54.52) | 53.95<br>(51.32-56.39) | 61.24<br>(58.48-63.62)                                            | 62.91<br>(61.37-64.38) | 73.49<br>(71.72-75.12) | 49.88<br>(47.96-51.78)                                               | 50.27<br>(48.27-52.19) | 47.61<br>(44.41-50.49) | 100.00<br>(100.00-100.00)                                                                                 | 100.00<br>(100.00-100.00) | 100.00<br>(100.00-100.00) |
| Albania                | 54.21<br>(51.40-56.89)           | 52.23<br>(49.24-54.60) | 67.29<br>(64.72-69.46) | 48.49<br>(42.80-53.70)                                            | 55.07<br>(49.36-59.16) | 67.58<br>(62.65-71.55) | 57.35<br>(54.14-60.11)                                               | 50.72<br>(47.50-53.58) | 64.97<br>(60.48-68.18) | 100.00<br>(100.00-100.00)                                                                                 | 25.93<br>(21.45-30.97)    | 100.00<br>(100.00-100.00) |
| Bosnia and Herzegovina | 48.96<br>(46.65-50.98)           | 60.98<br>(58.96-62.77) | 63.25<br>(61.17-65.34) | 56.55<br>(51.87-60.69)                                            | 66.87<br>(62.81-70.12) | 76.38<br>(73.00-78.78) | 46.14<br>(43.63-48.79)                                               | 57.75<br>(55.02-60.16) | 56.94<br>(53.82-59.70) | 100.00<br>(100.00-100.00)                                                                                 | 100.00<br>(100.00-100.00) | 38.55<br>(30.02-55.61)    |
| Bulgaria               | 54.83<br>(52.12-56.90)           | 54.77<br>(52.53-56.64) | 64.16<br>(62.08-66.02) | 64.71<br>(61.69-67.32)                                            | 67.18<br>(64.14-69.52) | 77.76<br>(74.69-79.93) | 48.15<br>(40.19-52.29)                                               | 49.57<br>(46.44-52.39) | 57.37<br>(53.91-60.28) | 100.00<br>(100.00-100.00)                                                                                 | 30.25<br>(25.64-34.62)    | 54.04<br>(41.62-73.60)    |
| Croatia                | 57.63<br>(55.63-59.40)           | 61.90<br>(59.98-63.75) | 69.84<br>(67.96-71.45) | 65.11<br>(61.36-68.06)                                            | 70.84<br>(67.31-73.73) | 79.90<br>(76.33-82.61) | 54.82<br>(52.37-57.08)                                               | 57.97<br>(55.68-60.24) | 63.94<br>(61.17-66.41) | 100.00<br>(100.00-100.00)                                                                                 | 100.00<br>(100.00-100.00) | 100.00<br>(100.00-100.00) |

**Appendix Table 1a. Scaled values for each SDG health-related indicator and three summary indicators by country for 1990, 2000, and 2015**

| Location       | Geometric mean of all indicators |                        |                        | Geometric mean of all indicators with corresponding MDG indicator |                        |                        | Geometric mean of all indicators without corresponding MDG indicator |                        |                        | Indicator 1.5.1: Age-standardised death rate due to exposure to forces of nature (per 100,000 population) |                           |                           |
|----------------|----------------------------------|------------------------|------------------------|-------------------------------------------------------------------|------------------------|------------------------|----------------------------------------------------------------------|------------------------|------------------------|-----------------------------------------------------------------------------------------------------------|---------------------------|---------------------------|
|                | 1990                             | 2000                   | 2015                   | 1990                                                              | 2000                   | 2015                   | 1990                                                                 | 2000                   | 2015                   | 1990                                                                                                      | 2000                      | 2015                      |
| Czech Republic | 61.01<br>(59.44-62.40)           | 65.62<br>(63.91-67.34) | 73.63<br>(72.00-75.00) | 74.23<br>(71.71-76.11)                                            | 83.83<br>(81.29-85.61) | 89.55<br>(86.97-91.13) | 56.21<br>(53.88-58.31)                                               | 58.16<br>(55.83-60.41) | 65.83<br>(63.31-68.01) | 100.00<br>(100.00-100.00)                                                                                 | 51.91<br>(38.70-71.54)    | 100.00<br>(100.00-100.00) |
| Hungary        | 57.22<br>(55.37-58.92)           | 62.14<br>(60.33-63.93) | 73.14<br>(71.46-74.49) | 68.06<br>(65.46-70.11)                                            | 76.83<br>(74.10-78.85) | 85.68<br>(82.91-87.48) | 51.79<br>(48.64-54.38)                                               | 55.54<br>(52.97-58.02) | 65.92<br>(63.23-68.19) | 100.00<br>(100.00-100.00)                                                                                 | 44.47<br>(34.43-62.84)    | 100.00<br>(100.00-100.00) |
| Macedonia      | 55.85<br>(53.02-57.92)           | 56.98<br>(54.52-58.94) | 65.52<br>(63.40-67.35) | 57.19<br>(51.08-61.29)                                            | 65.28<br>(59.68-69.21) | 73.79<br>(69.75-77.06) | 56.70<br>(54.21-59.06)                                               | 54.31<br>(51.80-56.46) | 61.87<br>(59.16-64.26) | 100.00<br>(100.00-100.00)                                                                                 | 26.93<br>(22.42-32.26)    | 100.00<br>(100.00-100.00) |
| Montenegro     | 60.39<br>(58.27-62.31)           | 60.59<br>(58.71-62.23) | 67.37<br>(65.31-69.06) | 63.57<br>(59.60-67.16)                                            | 68.13<br>(64.17-71.24) | 78.80<br>(74.86-81.86) | 59.19<br>(56.44-61.49)                                               | 57.61<br>(55.23-59.90) | 61.45<br>(58.75-63.79) | 100.00<br>(100.00-100.00)                                                                                 | 100.00<br>(100.00-100.00) | 100.00<br>(100.00-100.00) |
| Poland         | 55.65<br>(53.88-57.59)           | 62.49<br>(60.56-64.36) | 71.52<br>(69.94-73.05) | 62.78<br>(59.09-65.84)                                            | 73.20<br>(69.53-76.09) | 82.24<br>(79.31-84.78) | 53.59<br>(51.11-55.83)                                               | 58.18<br>(55.61-60.57) | 66.03<br>(63.43-68.32) | 100.00<br>(100.00-100.00)                                                                                 | 57.44<br>(44.20-76.91)    | 100.00<br>(100.00-100.00) |
| Romania        | 50.31<br>(48.48-52.16)           | 53.52<br>(51.78-55.13) | 63.00<br>(61.23-64.85) | 53.95<br>(50.33-57.08)                                            | 59.18<br>(56.20-61.91) | 72.72<br>(69.30-75.58) | 50.34<br>(47.97-52.69)                                               | 51.74<br>(49.33-53.90) | 58.37<br>(55.67-60.90) | 100.00<br>(100.00-100.00)                                                                                 | 33.03<br>(26.30-41.12)    | 50.47<br>(38.67-64.81)    |
| Serbia         | 57.55<br>(55.39-59.47)           | 52.86<br>(50.80-54.84) | 64.59<br>(62.69-66.52) | 59.70<br>(55.16-63.49)                                            | 64.92<br>(60.62-68.18) | 75.65<br>(71.98-78.46) | 56.85<br>(54.30-59.08)                                               | 48.77<br>(46.21-51.18) | 59.98<br>(57.57-62.44) | 100.00<br>(100.00-100.00)                                                                                 | 44.09<br>(36.23-52.31)    | 40.13<br>(30.75-58.36)    |
| Slovakia       | 61.02<br>(59.49-62.54)           | 64.12<br>(62.47-65.88) | 72.89<br>(71.03-74.59) | 71.90<br>(68.94-74.04)                                            | 79.90<br>(77.01-81.88) | 86.70<br>(84.03-88.33) | 56.63<br>(54.52-58.73)                                               | 57.59<br>(54.99-59.95) | 66.30<br>(63.57-68.73) | 100.00<br>(100.00-100.00)                                                                                 | 31.89<br>(24.36-44.86)    | 60.10<br>(45.34-80.86)    |
| Slovenia       | 58.07<br>(56.29-60.03)           | 66.12<br>(64.54-67.61) | 76.14<br>(74.46-77.48) | 72.66<br>(70.03-74.59)                                            | 81.81<br>(78.87-83.71) | 88.76<br>(85.68-90.41) | 52.42<br>(49.84-54.87)                                               | 58.73<br>(56.41-60.92) | 67.89<br>(64.86-70.46) | 36.43<br>(27.92-53.88)                                                                                    | 44.56<br>(36.12-54.66)    | 100.00<br>(100.00-100.00) |
| Armenia        | 52.80<br>(49.94-55.15)           | 56.64<br>(53.83-58.82) | 61.02<br>(57.82-63.29) | 47.20<br>(42.23-51.47)                                            | 51.83<br>(46.46-55.49) | 62.01<br>(55.16-66.10) | 57.57<br>(55.11-59.92)                                               | 60.90<br>(58.58-62.82) | 60.98<br>(58.58-63.23) | 100.00<br>(100.00-100.00)                                                                                 | 100.00<br>(100.00-100.00) | 49.90<br>(40.34-61.94)    |
| Azerbaijan     | 49.98<br>(47.67-51.98)           | 52.11<br>(50.42-53.53) | 62.70<br>(61.02-64.39) | 41.81<br>(38.29-45.01)                                            | 43.53<br>(41.18-45.73) | 61.54<br>(58.92-63.95) | 56.95<br>(54.00-59.51)                                               | 58.99<br>(56.78-61.05) | 63.12<br>(60.50-65.81) | 100.00<br>(100.00-100.00)                                                                                 | 35.66<br>(29.32-44.92)    | 100.00<br>(100.00-100.00) |

**Appendix Table 1a. Scaled values for each SDG health-related indicator and three summary indicators by country for 1990, 2000, and 2015**

| Location     | Geometric mean of all indicators |                        |                        | Geometric mean of all indicators with corresponding MDG indicator |                        |                        | Geometric mean of all indicators without corresponding MDG indicator |                        |                        | Indicator 1.5.1: Age-standardised death rate due to exposure to forces of nature (per 100,000 population) |                           |                           |
|--------------|----------------------------------|------------------------|------------------------|-------------------------------------------------------------------|------------------------|------------------------|----------------------------------------------------------------------|------------------------|------------------------|-----------------------------------------------------------------------------------------------------------|---------------------------|---------------------------|
|              | 1990                             | 2000                   | 2015                   | 1990                                                              | 2000                   | 2015                   | 1990                                                                 | 2000                   | 2015                   | 1990                                                                                                      | 2000                      | 2015                      |
| Georgia      | 54.34<br>(50.63-56.90)           | 54.11<br>(50.02-56.60) | 57.60<br>(54.15-60.06) | 46.53<br>(39.22-50.81)                                            | 47.94<br>(39.38-51.97) | 60.15<br>(52.41-65.02) | 60.89<br>(58.20-63.41)                                               | 59.43<br>(56.83-61.79) | 57.35<br>(54.66-59.68) | 100.00<br>(100.00-100.00)                                                                                 | 100.00<br>(100.00-100.00) | 28.83<br>(23.64-36.77)    |
| Kazakhstan   | 53.17<br>(51.29-54.89)           | 52.26<br>(50.82-53.82) | 61.53<br>(59.67-63.34) | 55.32<br>(52.40-57.92)                                            | 59.00<br>(56.75-60.92) | 69.32<br>(66.63-71.72) | 53.27<br>(50.96-55.34)                                               | 50.64<br>(48.80-52.65) | 57.79<br>(55.48-60.07) | 100.00<br>(100.00-100.00)                                                                                 | 100.00<br>(100.00-100.00) | 100.00<br>(100.00-100.00) |
| Kyrgyzstan   | 50.09<br>(48.03-51.99)           | 47.68<br>(45.64-49.66) | 55.99<br>(54.08-57.62) | 45.49<br>(41.97-48.89)                                            | 50.47<br>(47.63-52.83) | 57.68<br>(54.56-60.44) | 53.52<br>(51.08-55.80)                                               | 48.13<br>(45.60-50.57) | 55.81<br>(53.59-57.82) | 100.00<br>(100.00-100.00)                                                                                 | 41.68<br>(34.42-51.01)    | 33.43<br>(27.52-42.28)    |
| Mongolia     | 41.25<br>(39.01-43.29)           | 44.97<br>(43.00-46.98) | 56.37<br>(53.90-58.61) | 37.29<br>(32.92-41.08)                                            | 46.71<br>(42.98-49.69) | 59.41<br>(55.05-63.19) | 44.38<br>(42.00-46.58)                                               | 45.58<br>(43.13-47.88) | 55.28<br>(52.69-57.79) | 15.14<br>(12.11-19.30)                                                                                    | 22.78<br>(18.68-28.63)    | 100.00<br>(100.00-100.00) |
| Tajikistan   | 47.20<br>(45.21-49.18)           | 44.09<br>(42.05-45.97) | 59.04<br>(57.10-60.88) | 43.00<br>(39.73-46.23)                                            | 42.94<br>(40.78-45.20) | 58.05<br>(55.19-60.63) | 50.70<br>(48.05-53.45)                                               | 45.97<br>(43.38-48.36) | 59.41<br>(56.79-61.86) | 100.00<br>(100.00-100.00)                                                                                 | 23.98<br>(19.71-30.43)    | 42.38<br>(34.51-53.54)    |
| Turkmenistan | 54.46<br>(52.36-56.43)           | 54.20<br>(52.02-56.10) | 66.14<br>(63.94-68.04) | 47.32<br>(43.54-51.08)                                            | 50.68<br>(46.62-53.98) | 64.66<br>(60.22-68.12) | 59.75<br>(57.88-61.57)                                               | 57.63<br>(55.34-59.67) | 66.35<br>(63.72-68.61) | 100.00<br>(100.00-100.00)                                                                                 | 47.32<br>(38.56-58.36)    | 100.00<br>(100.00-100.00) |
| Uzbekistan   | 55.97<br>(54.27-57.67)           | 56.08<br>(54.40-57.46) | 67.10<br>(65.40-68.71) | 52.65<br>(49.75-55.49)                                            | 56.60<br>(54.06-58.65) | 70.35<br>(67.24-73.15) | 56.13<br>(53.49-58.45)                                               | 54.99<br>(52.77-57.03) | 64.02<br>(61.65-66.41) | 100.00<br>(100.00-100.00)                                                                                 | 100.00<br>(100.00-100.00) | 100.00<br>(100.00-100.00) |
| Colombia     | 43.28<br>(41.82-44.63)           | 44.94<br>(43.36-46.44) | 60.65<br>(58.77-62.23) | 48.89<br>(45.81-51.11)                                            | 53.52<br>(50.33-55.95) | 65.03<br>(61.42-67.99) | 43.32<br>(41.79-45.06)                                               | 44.03<br>(42.46-45.93) | 60.52<br>(58.97-61.86) | 26.77<br>(22.78-31.04)                                                                                    | 20.22<br>(17.10-23.41)    | 28.74<br>(24.40-33.15)    |
| Costa Rica   | 60.26<br>(58.05-62.06)           | 59.05<br>(56.84-60.76) | 66.56<br>(64.17-68.32) | 55.87<br>(51.54-58.92)                                            | 62.39<br>(57.73-65.50) | 71.01<br>(66.21-74.14) | 63.02<br>(60.88-65.00)                                               | 58.14<br>(55.72-60.11) | 64.07<br>(60.59-66.44) | 100.00<br>(100.00-100.00)                                                                                 | 23.80<br>(20.05-27.55)    | 45.45<br>(37.61-52.57)    |
| El Salvador  | 42.01<br>(39.91-43.89)           | 46.53<br>(44.64-48.36) | 58.15<br>(55.70-60.34) | 43.60<br>(40.10-46.13)                                            | 52.76<br>(49.31-55.52) | 66.45<br>(62.10-70.09) | 43.28<br>(41.01-45.57)                                               | 45.74<br>(43.70-47.81) | 55.92<br>(53.41-58.25) | 100.00<br>(100.00-100.00)                                                                                 | 14.54<br>(12.10-17.02)    | 31.07<br>(26.42-35.91)    |
| Guatemala    | 37.92<br>(35.92-39.51)           | 41.20<br>(39.19-42.81) | 51.25<br>(49.12-53.25) | 28.03<br>(25.27-30.27)                                            | 36.49<br>(33.24-38.82) | 49.85<br>(45.96-53.24) | 46.10<br>(43.93-48.23)                                               | 45.68<br>(43.74-47.49) | 53.27<br>(51.00-55.38) | 100.00<br>(100.00-100.00)                                                                                 | 18.69<br>(15.76-21.73)    | 23.52<br>(20.53-25.77)    |

**Appendix Table 1a. Scaled values for each SDG health-related indicator and three summary indicators by country for 1990, 2000, and 2015**

| Location            | Geometric mean of all indicators |                        |                        | Geometric mean of all indicators with corresponding MDG indicator |                        |                        | Geometric mean of all indicators without corresponding MDG indicator |                        |                        | Indicator 1.5.1: Age-standardised death rate due to exposure to forces of nature (per 100,000 population) |                           |                           |
|---------------------|----------------------------------|------------------------|------------------------|-------------------------------------------------------------------|------------------------|------------------------|----------------------------------------------------------------------|------------------------|------------------------|-----------------------------------------------------------------------------------------------------------|---------------------------|---------------------------|
|                     | 1990                             | 2000                   | 2015                   | 1990                                                              | 2000                   | 2015                   | 1990                                                                 | 2000                   | 2015                   | 1990                                                                                                      | 2000                      | 2015                      |
| Honduras            | 46.58<br>(44.60-48.30)           | 41.66<br>(39.38-43.46) | 54.71<br>(51.84-57.20) | 35.43<br>(32.89-37.70)                                            | 43.28<br>(41.02-45.34) | 57.85<br>(54.87-60.16) | 55.21<br>(52.59-57.51)                                               | 43.30<br>(40.25-45.85) | 54.61<br>(50.74-57.77) | 100.00<br>(100.00-100.00)                                                                                 | 3.14<br>(1.18-4.18)       | 36.37<br>(30.60-42.23)    |
| Mexico              | 49.62<br>(47.65-51.27)           | 56.48<br>(55.01-57.83) | 64.01<br>(62.34-65.35) | 50.48<br>(48.74-51.93)                                            | 59.86<br>(57.99-61.37) | 68.41<br>(66.04-70.20) | 50.64<br>(47.84-53.09)                                               | 56.24<br>(53.85-58.31) | 63.61<br>(61.59-65.33) | 25.65<br>(18.00-34.62)                                                                                    | 25.44<br>(18.23-31.77)    | 41.32<br>(30.71-50.36)    |
| Nicaragua           | 46.12<br>(44.14-47.74)           | 46.73<br>(44.85-48.30) | 58.86<br>(56.59-61.05) | 37.37<br>(34.42-39.81)                                            | 44.35<br>(41.29-46.77) | 56.51<br>(52.43-59.84) | 52.76<br>(50.35-54.81)                                               | 49.67<br>(47.61-51.43) | 60.83<br>(58.40-62.94) | 100.00<br>(100.00-100.00)                                                                                 | 6.26<br>(4.73-7.75)       | 30.79<br>(26.22-35.37)    |
| Panama              | 57.88<br>(56.21-59.46)           | 55.20<br>(53.51-56.78) | 63.35<br>(61.35-65.24) | 50.44<br>(47.45-52.83)                                            | 54.70<br>(51.42-57.24) | 62.31<br>(58.86-65.39) | 63.57<br>(61.73-65.47)                                               | 57.70<br>(55.87-59.49) | 65.70<br>(63.69-67.65) | 100.00<br>(100.00-100.00)                                                                                 | 30.14<br>(25.40-35.36)    | 32.60<br>(27.62-36.82)    |
| Venezuela           | 52.92<br>(51.27-54.44)           | 46.50<br>(44.66-48.05) | 62.04<br>(59.86-63.92) | 50.98<br>(47.90-53.30)                                            | 56.75<br>(53.70-59.33) | 64.14<br>(60.41-67.17) | 55.49<br>(53.62-57.31)                                               | 44.43<br>(42.29-46.31) | 61.96<br>(59.40-64.24) | 100.00<br>(100.00-100.00)                                                                                 | 4.75<br>(3.06-6.02)       | 100.00<br>(100.00-100.00) |
| Bolivia             | 39.78<br>(37.04-41.86)           | 41.13<br>(39.45-43.48) | 53.18<br>(51.15-55.10) | 30.70<br>(29.35-32.07)                                            | 40.89<br>(39.70-42.09) | 57.67<br>(55.66-59.52) | 46.94<br>(42.41-49.97)                                               | 42.84<br>(40.22-45.67) | 51.60<br>(48.76-54.16) | 100.00<br>(100.00-100.00)                                                                                 | 20.48<br>(14.51-30.00)    | 22.28<br>(16.05-32.12)    |
| Ecuador             | 56.00<br>(54.56-57.36)           | 54.78<br>(53.29-56.50) | 63.37<br>(61.68-65.05) | 48.78<br>(47.28-50.32)                                            | 54.68<br>(53.47-55.82) | 68.81<br>(67.60-70.04) | 59.15<br>(56.72-61.16)                                               | 55.09<br>(52.72-57.47) | 60.76<br>(58.31-63.13) | 100.00<br>(100.00-100.00)                                                                                 | 21.58<br>(15.45-31.30)    | 34.31<br>(26.96-45.29)    |
| Peru                | 42.69<br>(41.21-44.02)           | 52.55<br>(51.03-54.10) | 64.64<br>(63.06-66.22) | 40.05<br>(38.57-41.43)                                            | 50.82<br>(49.76-51.88) | 67.08<br>(65.41-68.65) | 45.08<br>(42.78-47.06)                                               | 53.69<br>(51.19-56.08) | 63.01<br>(60.62-65.27) | 16.78<br>(11.46-25.48)                                                                                    | 19.43<br>(13.63-28.74)    | 35.37<br>(27.98-46.36)    |
| Antigua and Barbuda | 67.85<br>(65.92-69.62)           | 69.43<br>(67.55-71.08) | 73.66<br>(71.85-75.36) | 62.30<br>(59.26-64.76)                                            | 64.46<br>(61.71-66.83) | 71.99<br>(69.40-74.38) | 71.41<br>(68.71-73.84)                                               | 72.78<br>(69.72-75.23) | 74.98<br>(72.24-77.36) | 100.00<br>(100.00-100.00)                                                                                 | 100.00<br>(100.00-100.00) | 100.00<br>(100.00-100.00) |
| The Bahamas         | 60.65<br>(58.93-62.34)           | 62.30<br>(60.39-64.14) | 69.49<br>(67.55-71.34) | 58.77<br>(55.88-61.31)                                            | 66.47<br>(63.88-68.61) | 72.08<br>(68.94-74.64) | 62.44<br>(60.05-64.57)                                               | 60.87<br>(58.45-63.32) | 68.38<br>(65.61-70.72) | 100.00<br>(100.00-100.00)                                                                                 | 35.82<br>(28.40-46.81)    | 100.00<br>(100.00-100.00) |
| Barbados            | 62.27<br>(60.23-64.14)           | 67.81<br>(65.81-69.65) | 71.02<br>(69.10-72.94) | 60.65<br>(57.75-63.08)                                            | 63.83<br>(61.01-66.13) | 70.62<br>(67.43-73.27) | 63.36<br>(60.57-66.03)                                               | 69.73<br>(67.08-72.22) | 70.65<br>(67.82-73.09) | 100.00<br>(100.00-100.00)                                                                                 | 100.00<br>(100.00-100.00) | 100.00<br>(100.00-100.00) |

**Appendix Table 1a. Scaled values for each SDG health-related indicator and three summary indicators by country for 1990, 2000, and 2015**

| Location                         | Geometric mean of all indicators |                        |                        | Geometric mean of all indicators with corresponding MDG indicator |                        |                        | Geometric mean of all indicators without corresponding MDG indicator |                        |                        | Indicator 1.5.1: Age-standardised death rate due to exposure to forces of nature (per 100,000 population) |                           |                           |
|----------------------------------|----------------------------------|------------------------|------------------------|-------------------------------------------------------------------|------------------------|------------------------|----------------------------------------------------------------------|------------------------|------------------------|-----------------------------------------------------------------------------------------------------------|---------------------------|---------------------------|
|                                  | 1990                             | 2000                   | 2015                   | 1990                                                              | 2000                   | 2015                   | 1990                                                                 | 2000                   | 2015                   | 1990                                                                                                      | 2000                      | 2015                      |
| Belize                           | 47.67<br>(42.29-50.18)           | 48.10<br>(42.90-50.56) | 59.16<br>(54.08-61.77) | 38.20<br>(28.63-42.14)                                            | 43.82<br>(33.95-47.81) | 55.25<br>(43.89-59.94) | 53.85<br>(51.31-56.45)                                               | 51.44<br>(48.94-53.98) | 62.10<br>(59.62-64.36) | 100.00<br>(100.00-100.00)                                                                                 | 17.67<br>(12.19-26.60)    | 100.00<br>(100.00-100.00) |
| Cuba                             | 55.28<br>(53.51-57.12)           | 56.67<br>(54.85-58.47) | 64.59<br>(62.80-66.39) | 60.85<br>(57.54-63.41)                                            | 64.02<br>(61.26-66.34) | 72.44<br>(69.39-74.59) | 53.48<br>(50.94-55.95)                                               | 54.07<br>(51.57-56.61) | 60.41<br>(57.76-62.99) | 100.00<br>(100.00-100.00)                                                                                 | 24.28<br>(17.78-34.42)    | 31.18<br>(24.02-42.01)    |
| Dominica                         | 60.83<br>(58.45-62.76)           | 60.64<br>(58.71-62.51) | 67.55<br>(65.45-69.30) | 55.23<br>(51.37-58.56)                                            | 60.89<br>(57.49-63.74) | 66.92<br>(63.56-69.92) | 63.59<br>(60.62-66.08)                                               | 60.98<br>(58.28-63.60) | 68.11<br>(65.53-70.59) | 100.00<br>(100.00-100.00)                                                                                 | 28.56<br>(21.61-39.19)    | 100.00<br>(100.00-100.00) |
| Dominican Republic               | 52.68<br>(50.48-54.34)           | 50.47<br>(47.91-52.54) | 61.93<br>(59.99-63.48) | 43.23<br>(39.72-45.54)                                            | 47.21<br>(42.87-49.82) | 57.47<br>(53.86-60.18) | 58.84<br>(56.28-61.10)                                               | 53.61<br>(51.09-56.21) | 64.95<br>(62.61-66.97) | 100.00<br>(100.00-100.00)                                                                                 | 18.72<br>(13.05-27.88)    | 100.00<br>(100.00-100.00) |
| Grenada                          | 55.50<br>(53.25-57.76)           | 63.04<br>(60.91-64.73) | 63.39<br>(61.30-65.76) | 52.70<br>(48.77-55.98)                                            | 60.39<br>(56.87-63.31) | 69.94<br>(66.48-72.88) | 57.53<br>(54.61-60.42)                                               | 64.80<br>(62.28-67.07) | 61.02<br>(58.35-64.16) | 100.00<br>(100.00-100.00)                                                                                 | 100.00<br>(100.00-100.00) | 26.70<br>(20.10-40.64)    |
| Guyana                           | 44.70<br>(42.77-46.51)           | 46.02<br>(44.23-47.85) | 56.71<br>(54.62-58.66) | 35.65<br>(32.80-37.95)                                            | 39.57<br>(37.06-41.78) | 51.02<br>(48.17-53.53) | 51.54<br>(48.96-53.91)                                               | 51.07<br>(48.42-53.44) | 60.26<br>(57.13-63.02) | 100.00<br>(100.00-100.00)                                                                                 | 56.41<br>(43.38-77.57)    | 100.00<br>(100.00-100.00) |
| Haiti                            | 29.95<br>(27.12-32.41)           | 32.33<br>(29.15-34.86) | 40.75<br>(36.58-43.53) | 15.86<br>(12.65-18.43)                                            | 20.58<br>(16.36-23.43) | 31.47<br>(24.34-35.31) | 43.38<br>(39.74-46.43)                                               | 42.60<br>(39.21-45.85) | 47.48<br>(43.82-50.83) | 100.00<br>(100.00-100.00)                                                                                 | 20.58<br>(14.60-30.12)    | 27.01<br>(20.21-37.49)    |
| Jamaica                          | 59.28<br>(57.49-60.92)           | 61.88<br>(60.26-63.26) | 66.23<br>(64.43-67.95) | 53.28<br>(50.38-55.65)                                            | 58.80<br>(56.26-60.76) | 68.03<br>(65.24-70.59) | 62.05<br>(59.38-64.47)                                               | 63.13<br>(60.72-65.30) | 64.50<br>(61.80-67.10) | 100.00<br>(100.00-100.00)                                                                                 | 100.00<br>(100.00-100.00) | 100.00<br>(100.00-100.00) |
| Saint Lucia                      | 53.67<br>(51.70-55.59)           | 61.50<br>(59.78-63.14) | 67.40<br>(65.39-69.30) | 49.02<br>(45.29-52.13)                                            | 57.54<br>(54.30-60.35) | 67.14<br>(63.74-70.17) | 56.04<br>(53.48-58.75)                                               | 63.86<br>(61.27-66.03) | 67.97<br>(65.25-70.10) | 100.00<br>(100.00-100.00)                                                                                 | 100.00<br>(100.00-100.00) | 100.00<br>(100.00-100.00) |
| Saint Vincent and the Grenadines | 53.70<br>(51.37-55.87)           | 61.32<br>(59.29-63.15) | 66.26<br>(64.33-68.20) | 51.11<br>(47.48-54.31)                                            | 56.37<br>(53.16-59.19) | 65.64<br>(62.17-68.37) | 55.59<br>(52.48-58.55)                                               | 63.67<br>(60.77-66.24) | 65.75<br>(63.00-68.37) | 100.00<br>(100.00-100.00)                                                                                 | 100.00<br>(100.00-100.00) | 100.00<br>(100.00-100.00) |
| Suriname                         | 48.84<br>(46.44-50.87)           | 54.23<br>(51.85-55.98) | 60.95<br>(58.82-62.85) | 42.62<br>(39.25-45.16)                                            | 46.43<br>(43.07-48.58) | 58.55<br>(55.12-61.25) | 54.09<br>(51.08-56.82)                                               | 60.02<br>(56.96-62.57) | 63.23<br>(60.48-65.54) | 100.00<br>(100.00-100.00)                                                                                 | 100.00<br>(100.00-100.00) | 100.00<br>(100.00-100.00) |

**Appendix Table 1a. Scaled values for each SDG health-related indicator and three summary indicators by country for 1990, 2000, and 2015**

| Location            | Geometric mean of all indicators |                        |                        | Geometric mean of all indicators with corresponding MDG indicator |                        |                        | Geometric mean of all indicators without corresponding MDG indicator |                        |                        | Indicator 1.5.1: Age-standardised death rate due to exposure to forces of nature (per 100,000 population) |                           |                           |
|---------------------|----------------------------------|------------------------|------------------------|-------------------------------------------------------------------|------------------------|------------------------|----------------------------------------------------------------------|------------------------|------------------------|-----------------------------------------------------------------------------------------------------------|---------------------------|---------------------------|
|                     | 1990                             | 2000                   | 2015                   | 1990                                                              | 2000                   | 2015                   | 1990                                                                 | 2000                   | 2015                   | 1990                                                                                                      | 2000                      | 2015                      |
| Trinidad and Tobago | 55.68<br>(54.10-57.07)           | 62.16<br>(60.65-63.58) | 67.01<br>(65.32-68.62) | 56.60<br>(53.85-58.76)                                            | 58.80<br>(56.30-60.91) | 69.41<br>(66.59-71.83) | 57.23<br>(55.16-59.05)                                               | 65.64<br>(63.50-67.46) | 67.35<br>(65.12-69.30) | 100.00<br>(100.00-100.00)                                                                                 | 100.00<br>(100.00-100.00) | 100.00<br>(100.00-100.00) |
| Brazil              | 47.85<br>(46.30-49.40)           | 52.76<br>(50.68-54.59) | 60.10<br>(58.22-61.89) | 47.05<br>(44.95-48.70)                                            | 55.85<br>(53.71-57.61) | 64.06<br>(61.88-65.97) | 49.92<br>(47.56-52.16)                                               | 52.16<br>(49.41-54.57) | 57.62<br>(54.59-60.29) | 32.73<br>(22.79-44.29)                                                                                    | 35.28<br>(26.16-43.28)    | 32.58<br>(22.76-45.87)    |
| Paraguay            | 52.52<br>(50.53-54.14)           | 50.90<br>(49.30-52.25) | 59.08<br>(57.29-60.73) | 44.52<br>(41.45-47.14)                                            | 50.40<br>(47.77-52.56) | 62.62<br>(59.94-64.99) | 57.91<br>(55.33-60.16)                                               | 52.37<br>(50.15-54.18) | 57.76<br>(55.06-59.96) | 100.00<br>(100.00-100.00)                                                                                 | 21.43<br>(18.71-23.15)    | 31.60<br>(27.17-34.13)    |
| China               | 41.15<br>(39.46-42.77)           | 47.62<br>(46.15-49.05) | 59.84<br>(58.58-61.26) | 40.06<br>(37.81-42.05)                                            | 51.76<br>(50.10-53.24) | 69.67<br>(68.18-71.10) | 39.47<br>(36.36-42.66)                                               | 45.43<br>(43.15-47.52) | 54.63<br>(52.60-56.64) | 37.02<br>(30.94-43.72)                                                                                    | 30.13<br>(24.74-36.49)    | 38.96<br>(33.20-45.60)    |
| North Korea         | 50.15<br>(46.83-53.13)           | 47.13<br>(42.93-50.71) | 54.67<br>(51.80-57.73) | 46.02<br>(38.67-50.90)                                            | 45.38<br>(37.31-50.82) | 60.50<br>(55.95-64.61) | 52.26<br>(48.48-55.59)                                               | 48.11<br>(43.70-51.60) | 51.05<br>(46.66-55.10) | 100.00<br>(100.00-100.00)                                                                                 | 30.71<br>(23.58-41.50)    | 31.52<br>(24.34-42.37)    |
| Taiwan              | 63.33<br>(61.58-64.81)           | 60.21<br>(58.29-62.22) | 73.85<br>(72.04-75.56) | 73.91<br>(70.54-76.47)                                            | 76.37<br>(73.42-78.50) | 83.15<br>(80.19-85.18) | 56.21<br>(53.64-58.52)                                               | 52.10<br>(48.87-54.93) | 66.56<br>(62.77-69.46) | 100.00<br>(100.00-100.00)                                                                                 | 14.45<br>(9.62-22.52)     | 100.00<br>(100.00-100.00) |
| Cambodia            | 27.80<br>(24.65-30.10)           | 33.02<br>(31.03-34.80) | 47.44<br>(45.58-49.33) | 13.53<br>(10.19-16.27)                                            | 21.04<br>(18.54-23.18) | 44.73<br>(42.08-47.23) | 41.29<br>(38.69-43.90)                                               | 42.29<br>(39.60-44.67) | 49.08<br>(46.64-51.70) | 100.00<br>(100.00-100.00)                                                                                 | 20.19<br>(15.60-27.21)    | 21.42<br>(16.45-29.65)    |
| Indonesia           | 41.46<br>(39.92-43.09)           | 46.71<br>(45.29-48.15) | 60.08<br>(58.29-61.89) | 28.73<br>(26.89-30.57)                                            | 38.41<br>(36.67-40.01) | 52.28<br>(49.76-54.59) | 49.85<br>(47.48-52.35)                                               | 52.03<br>(49.77-54.13) | 64.12<br>(61.80-66.57) | 36.68<br>(27.98-53.57)                                                                                    | 41.52<br>(33.44-51.40)    | 100.00<br>(100.00-100.00) |
| Laos                | 24.80<br>(22.53-27.09)           | 32.40<br>(30.51-34.21) | 45.18<br>(43.23-47.18) | 12.91<br>(10.84-15.40)                                            | 22.61<br>(20.79-24.28) | 43.40<br>(41.04-45.52) | 38.12<br>(34.84-41.27)                                               | 41.32<br>(38.25-44.07) | 47.47<br>(44.66-50.03) | 100.00<br>(100.00-100.00)                                                                                 | 32.46<br>(24.86-47.37)    | 30.57<br>(24.07-39.59)    |
| Malaysia            | 59.21<br>(57.43-60.64)           | 58.94<br>(57.31-60.53) | 69.18<br>(67.46-70.76) | 55.62<br>(52.28-58.11)                                            | 63.24<br>(60.16-65.56) | 72.97<br>(70.32-75.12) | 60.20<br>(58.12-62.09)                                               | 56.48<br>(54.37-58.64) | 65.57<br>(62.89-67.94) | 100.00<br>(100.00-100.00)                                                                                 | 26.01<br>(20.51-34.73)    | 100.00<br>(100.00-100.00) |
| Maldives            | 45.74<br>(40.41-48.49)           | 53.84<br>(48.44-56.32) | 64.80<br>(61.64-67.24) | 33.39<br>(25.23-37.61)                                            | 45.49<br>(35.27-49.87) | 60.65<br>(53.92-64.73) | 55.03<br>(52.29-57.88)                                               | 59.64<br>(57.17-61.92) | 66.76<br>(64.15-69.28) | 100.00<br>(100.00-100.00)                                                                                 | 100.00<br>(100.00-100.00) | 100.00<br>(100.00-100.00) |

**Appendix Table 1a. Scaled values for each SDG health-related indicator and three summary indicators by country for 1990, 2000, and 2015**

| Location                       | Geometric mean of all indicators |                        |                        | Geometric mean of all indicators with corresponding MDG indicator |                        |                        | Geometric mean of all indicators without corresponding MDG indicator |                        |                        | Indicator 1.5.1: Age-standardised death rate due to exposure to forces of nature (per 100,000 population) |                           |                           |
|--------------------------------|----------------------------------|------------------------|------------------------|-------------------------------------------------------------------|------------------------|------------------------|----------------------------------------------------------------------|------------------------|------------------------|-----------------------------------------------------------------------------------------------------------|---------------------------|---------------------------|
|                                | 1990                             | 2000                   | 2015                   | 1990                                                              | 2000                   | 2015                   | 1990                                                                 | 2000                   | 2015                   | 1990                                                                                                      | 2000                      | 2015                      |
| Mauritius                      | 60.72<br>(59.01-62.13)           | 62.87<br>(61.02-64.50) | 67.77<br>(66.03-69.54) | 58.31<br>(55.06-61.10)                                            | 64.54<br>(61.36-66.97) | 73.08<br>(70.43-75.18) | 60.64<br>(58.28-62.75)                                               | 61.12<br>(58.60-63.55) | 63.91<br>(61.14-66.56) | 100.00<br>(100.00-100.00)                                                                                 | 100.00<br>(100.00-100.00) | 36.15<br>(27.57-49.36)    |
| Myanmar                        | 32.70<br>(29.25-35.66)           | 35.91<br>(32.51-39.05) | 45.67<br>(42.31-49.09) | 17.86<br>(14.96-20.40)                                            | 24.41<br>(21.29-27.24) | 43.20<br>(39.61-46.54) | 44.04<br>(39.81-48.28)                                               | 43.68<br>(39.42-47.86) | 46.85<br>(42.78-50.92) | 100.00<br>(100.00-100.00)                                                                                 | 55.10<br>(42.25-73.96)    | 36.07<br>(28.96-45.83)    |
| Philippines                    | 39.25<br>(37.64-40.82)           | 43.79<br>(42.01-45.44) | 49.97<br>(48.00-51.97) | 35.81<br>(33.15-38.07)                                            | 41.19<br>(38.20-43.34) | 51.38<br>(47.93-54.12) | 43.56<br>(41.42-45.48)                                               | 47.51<br>(45.51-49.48) | 51.04<br>(48.72-53.38) | 10.01<br>(6.82-15.39)                                                                                     | 23.03<br>(17.17-33.08)    | 13.42<br>(9.70-19.84)     |
| Sri Lanka                      | 40.85<br>(38.73-43.76)           | 47.29<br>(45.37-49.43) | 62.03<br>(59.70-64.21) | 40.25<br>(37.00-43.06)                                            | 50.31<br>(47.39-52.99) | 70.13<br>(66.31-73.19) | 41.58<br>(38.87-45.64)                                               | 46.62<br>(44.22-49.46) | 58.69<br>(55.84-61.27) | 32.80<br>(24.49-48.75)                                                                                    | 36.67<br>(28.33-53.03)    | 22.64<br>(18.58-26.71)    |
| Seychelles                     | 62.59<br>(60.59-64.27)           | 65.54<br>(63.68-67.20) | 71.29<br>(69.27-73.07) | 64.04<br>(60.51-66.64)                                            | 69.39<br>(66.60-71.83) | 75.82<br>(72.83-77.98) | 61.70<br>(59.41-64.06)                                               | 63.33<br>(60.66-65.72) | 68.17<br>(65.52-70.70) | 100.00<br>(100.00-100.00)                                                                                 | 100.00<br>(100.00-100.00) | 100.00<br>(100.00-100.00) |
| Thailand                       | 45.70<br>(43.82-47.37)           | 49.12<br>(47.17-50.86) | 56.31<br>(54.01-58.39) | 43.18<br>(39.80-45.74)                                            | 51.98<br>(48.16-54.53) | 62.81<br>(58.69-65.78) | 48.67<br>(46.66-50.70)                                               | 49.32<br>(47.21-51.28) | 53.80<br>(51.36-56.50) | 23.64<br>(17.93-33.82)                                                                                    | 27.14<br>(21.40-35.74)    | 29.01<br>(22.32-41.33)    |
| Timor-Leste                    | 32.35<br>(29.63-34.71)           | 34.14<br>(32.51-35.91) | 52.80<br>(50.69-54.86) | 14.05<br>(11.37-16.59)                                            | 20.11<br>(18.08-22.07) | 43.19<br>(40.28-45.75) | 49.58<br>(46.42-52.62)                                               | 44.42<br>(41.75-47.16) | 57.26<br>(54.33-60.17) | 100.00<br>(100.00-100.00)                                                                                 | 100.00<br>(100.00-100.00) | 100.00<br>(100.00-100.00) |
| Vietnam                        | 42.41<br>(40.46-44.39)           | 47.51<br>(45.78-49.27) | 59.44<br>(57.14-61.77) | 31.45<br>(29.11-33.42)                                            | 44.05<br>(42.04-45.71) | 62.79<br>(60.48-64.91) | 48.06<br>(45.26-50.87)                                               | 48.77<br>(46.29-51.34) | 57.20<br>(54.09-60.21) | 29.16<br>(22.09-41.94)                                                                                    | 15.70<br>(11.69-22.44)    | 43.87<br>(33.46-61.63)    |
| Federated States of Micronesia | 51.07<br>(46.24-55.40)           | 55.27<br>(50.89-59.16) | 61.94<br>(56.43-65.72) | 48.19<br>(43.77-51.75)                                            | 54.90<br>(51.09-58.15) | 66.72<br>(62.77-69.84) | 51.74<br>(45.38-57.39)                                               | 54.64<br>(47.78-59.93) | 57.94<br>(50.88-63.28) | 100.00<br>(100.00-100.00)                                                                                 | 100.00<br>(100.00-100.00) | 100.00<br>(100.00-100.00) |
| Fiji                           | 56.68<br>(54.35-59.01)           | 53.26<br>(51.28-55.23) | 59.23<br>(56.88-61.45) | 55.13<br>(51.31-58.10)                                            | 59.04<br>(55.62-61.77) | 65.75<br>(62.41-68.60) | 56.47<br>(53.31-59.38)                                               | 50.23<br>(47.39-53.01) | 55.34<br>(52.14-58.54) | 100.00<br>(100.00-100.00)                                                                                 | 18.24<br>(15.89-19.78)    | 29.59<br>(25.55-31.85)    |
| Kiribati                       | 36.74<br>(33.18-40.24)           | 38.93<br>(35.75-42.57) | 47.85<br>(43.73-51.27) | 38.08<br>(33.29-41.70)                                            | 44.19<br>(40.11-47.75) | 54.82<br>(50.61-58.74) | 33.62<br>(26.93-39.33)                                               | 34.00<br>(27.61-39.89) | 40.21<br>(32.47-46.24) | 100.00<br>(100.00-100.00)                                                                                 | 100.00<br>(100.00-100.00) | 100.00<br>(100.00-100.00) |

**Appendix Table 1a. Scaled values for each SDG health-related indicator and three summary indicators by country for 1990, 2000, and 2015**

| Location         | Geometric mean of all indicators |                        |                        | Geometric mean of all indicators with corresponding MDG indicator |                        |                        | Geometric mean of all indicators without corresponding MDG indicator |                        |                        | Indicator 1.5.1: Age-standardised death rate due to exposure to forces of nature (per 100,000 population) |                           |                           |
|------------------|----------------------------------|------------------------|------------------------|-------------------------------------------------------------------|------------------------|------------------------|----------------------------------------------------------------------|------------------------|------------------------|-----------------------------------------------------------------------------------------------------------|---------------------------|---------------------------|
|                  | 1990                             | 2000                   | 2015                   | 1990                                                              | 2000                   | 2015                   | 1990                                                                 | 2000                   | 2015                   | 1990                                                                                                      | 2000                      | 2015                      |
| Marshall Islands | 49.34<br>(46.22-52.00)           | 52.54<br>(49.42-55.12) | 59.13<br>(55.76-61.96) | 42.56<br>(37.69-46.27)                                            | 49.44<br>(45.41-52.63) | 61.79<br>(57.50-65.16) | 51.07<br>(46.36-55.12)                                               | 52.21<br>(46.90-56.39) | 54.93<br>(48.80-59.53) | 100.00<br>(100.00-100.00)                                                                                 | 100.00<br>(100.00-100.00) | 100.00<br>(100.00-100.00) |
| Papua New Guinea | 24.67<br>(20.94-29.55)           | 26.42<br>(21.93-30.43) | 36.01<br>(29.70-40.59) | 17.89<br>(14.72-20.85)                                            | 20.99<br>(17.55-23.72) | 32.51<br>(28.82-36.04) | 28.74<br>(23.50-35.89)                                               | 29.55<br>(23.64-35.18) | 37.31<br>(28.90-43.39) | 100.00<br>(100.00-100.00)                                                                                 | 7.59<br>(6.07-8.54)       | 31.99<br>(27.39-34.60)    |
| Samoa            | 52.99<br>(49.94-55.63)           | 57.05<br>(53.96-59.70) | 57.37<br>(54.07-59.99) | 54.74<br>(50.13-58.34)                                            | 60.07<br>(56.06-63.20) | 69.16<br>(65.38-72.05) | 49.61<br>(41.39-54.50)                                               | 52.69<br>(44.90-57.78) | 49.02<br>(40.09-54.18) | 100.00<br>(100.00-100.00)                                                                                 | 100.00<br>(100.00-100.00) | 16.46<br>(14.28-17.89)    |
| Solomon Islands  | 38.06<br>(33.26-41.69)           | 42.77<br>(38.13-46.55) | 44.40<br>(39.58-48.03) | 26.49<br>(22.90-29.65)                                            | 34.05<br>(30.57-37.14) | 45.60<br>(41.50-49.02) | 43.65<br>(37.39-48.88)                                               | 46.10<br>(40.03-51.36) | 41.97<br>(36.15-46.71) | 100.00<br>(100.00-100.00)                                                                                 | 100.00<br>(100.00-100.00) | 13.79<br>(11.75-15.14)    |
| Tonga            | 54.30<br>(51.58-56.71)           | 57.35<br>(54.68-59.56) | 61.76<br>(57.80-64.76) | 54.50<br>(50.01-58.18)                                            | 59.10<br>(55.01-62.20) | 67.65<br>(63.64-71.06) | 51.74<br>(46.48-55.72)                                               | 53.30<br>(46.07-57.91) | 53.19<br>(43.25-59.75) | 100.00<br>(100.00-100.00)                                                                                 | 100.00<br>(100.00-100.00) | 100.00<br>(100.00-100.00) |
| Vanuatu          | 40.42<br>(34.59-44.63)           | 37.82<br>(33.03-41.78) | 46.33<br>(41.58-49.88) | 30.36<br>(23.66-34.30)                                            | 34.49<br>(27.96-38.09) | 45.58<br>(40.32-49.27) | 45.97<br>(38.44-51.35)                                               | 39.91<br>(33.63-44.74) | 46.06<br>(40.25-50.72) | 100.00<br>(100.00-100.00)                                                                                 | 5.74<br>(4.15-6.53)       | 14.53<br>(12.42-15.89)    |
| Afghanistan      | 19.79<br>(15.88-23.16)           | 17.49<br>(14.18-20.61) | 26.20<br>(21.58-29.55) | 11.42<br>(9.06-14.53)                                             | 12.86<br>(10.51-16.15) | 26.16<br>(20.43-29.80) | 28.17<br>(21.31-33.08)                                               | 22.27<br>(17.16-26.86) | 27.30<br>(21.49-31.40) | 100.00<br>(100.00-100.00)                                                                                 | 8.03<br>(6.01-11.14)      | 18.20<br>(14.63-24.27)    |
| Algeria          | 51.19<br>(47.04-54.07)           | 51.21<br>(48.00-53.31) | 58.74<br>(55.72-61.40) | 42.64<br>(34.33-47.21)                                            | 52.21<br>(46.49-55.79) | 61.90<br>(55.56-66.28) | 55.94<br>(52.58-58.83)                                               | 50.97<br>(47.92-53.73) | 56.06<br>(52.69-59.24) | 100.00<br>(100.00-100.00)                                                                                 | 58.77<br>(46.24-74.19)    | 52.11<br>(41.41-66.80)    |
| Bahrain          | 53.87<br>(50.79-56.29)           | 56.10<br>(53.22-58.82) | 65.33<br>(61.88-67.95) | 54.89<br>(48.43-58.52)                                            | 61.60<br>(55.78-65.27) | 70.72<br>(65.05-74.29) | 51.41<br>(46.69-54.85)                                               | 51.40<br>(46.80-55.19) | 58.69<br>(50.81-63.53) | 100.00<br>(100.00-100.00)                                                                                 | 100.00<br>(100.00-100.00) | 100.00<br>(100.00-100.00) |
| Egypt            | 48.59<br>(43.19-51.14)           | 52.04<br>(48.22-54.44) | 52.58<br>(49.07-55.90) | 39.49<br>(29.59-43.23)                                            | 51.44<br>(43.24-55.30) | 60.81<br>(52.44-65.18) | 54.80<br>(52.33-57.35)                                               | 52.66<br>(50.32-54.98) | 49.32<br>(46.75-53.08) | 100.00<br>(100.00-100.00)                                                                                 | 100.00<br>(100.00-100.00) | 100.00<br>(100.00-100.00) |
| Iran             | 37.91<br>(34.42-40.51)           | 46.03<br>(43.09-48.51) | 58.08<br>(54.69-60.96) | 39.38<br>(32.93-43.47)                                            | 53.65<br>(48.43-57.48) | 66.97<br>(61.49-70.68) | 39.19<br>(36.05-42.00)                                               | 44.54<br>(41.72-47.27) | 55.15<br>(51.54-58.38) | 2.46<br>(0.23-4.17)                                                                                       | 18.34<br>(14.75-24.43)    | 38.63<br>(31.31-50.79)    |

**Appendix Table 1a. Scaled values for each SDG health-related indicator and three summary indicators by country for 1990, 2000, and 2015**

| Location     | Geometric mean of all indicators |                        |                        | Geometric mean of all indicators with corresponding MDG indicator |                        |                        | Geometric mean of all indicators without corresponding MDG indicator |                        |                        | Indicator 1.5.1: Age-standardised death rate due to exposure to forces of nature (per 100,000 population) |                           |                           |
|--------------|----------------------------------|------------------------|------------------------|-------------------------------------------------------------------|------------------------|------------------------|----------------------------------------------------------------------|------------------------|------------------------|-----------------------------------------------------------------------------------------------------------|---------------------------|---------------------------|
|              | 1990                             | 2000                   | 2015                   | 1990                                                              | 2000                   | 2015                   | 1990                                                                 | 2000                   | 2015                   | 1990                                                                                                      | 2000                      | 2015                      |
| Iraq         | 44.27<br>(40.27-46.69)           | 47.93<br>(44.49-50.25) | 48.40<br>(45.18-50.92) | 40.04<br>(31.72-43.85)                                            | 44.80<br>(38.16-48.12) | 55.56<br>(49.51-59.03) | 47.24<br>(43.95-50.36)                                               | 50.81<br>(47.53-53.68) | 46.38<br>(43.16-49.54) | 100.00<br>(100.00-100.00)                                                                                 | 100.00<br>(100.00-100.00) | 52.58<br>(41.75-67.33)    |
| Jordan       | 58.41<br>(55.80-60.58)           | 62.85<br>(60.75-64.56) | 69.43<br>(67.50-71.20) | 56.01<br>(51.18-59.53)                                            | 62.95<br>(58.89-65.90) | 73.54<br>(70.39-75.88) | 60.70<br>(58.03-63.19)                                               | 63.89<br>(61.28-66.18) | 67.55<br>(65.17-69.84) | 100.00<br>(100.00-100.00)                                                                                 | 100.00<br>(100.00-100.00) | 100.00<br>(100.00-100.00) |
| Kuwait       | 52.86<br>(50.19-55.12)           | 58.73<br>(55.86-61.06) | 64.08<br>(61.24-66.77) | 58.80<br>(53.06-62.39)                                            | 65.47<br>(59.97-69.14) | 75.35<br>(70.41-78.92) | 49.95<br>(47.04-52.95)                                               | 54.16<br>(50.15-57.61) | 56.28<br>(49.95-60.50) | 100.00<br>(100.00-100.00)                                                                                 | 100.00<br>(100.00-100.00) | 100.00<br>(100.00-100.00) |
| Lebanon      | 45.55<br>(41.11-48.49)           | 55.16<br>(50.94-58.03) | 62.37<br>(59.23-65.02) | 46.86<br>(37.04-52.98)                                            | 54.63<br>(45.15-60.00) | 68.52<br>(62.45-72.99) | 46.49<br>(43.48-49.24)                                               | 55.53<br>(52.14-58.49) | 59.07<br>(55.59-62.58) | 100.00<br>(100.00-100.00)                                                                                 | 100.00<br>(100.00-100.00) | 100.00<br>(100.00-100.00) |
| Libya        | 51.88<br>(48.22-54.47)           | 51.96<br>(48.97-54.36) | 50.08<br>(47.45-52.53) | 47.24<br>(40.24-51.56)                                            | 55.25<br>(49.36-59.24) | 63.89<br>(58.22-68.14) | 52.25<br>(48.87-55.11)                                               | 49.03<br>(45.93-51.84) | 43.54<br>(40.28-46.77) | 100.00<br>(100.00-100.00)                                                                                 | 100.00<br>(100.00-100.00) | 47.43<br>(37.82-62.30)    |
| Morocco      | 43.23<br>(38.73-45.93)           | 50.01<br>(44.91-52.67) | 57.26<br>(52.74-60.09) | 33.26<br>(26.06-37.16)                                            | 44.16<br>(33.25-48.20) | 56.39<br>(47.28-60.97) | 49.62<br>(46.38-52.63)                                               | 52.39<br>(49.21-55.47) | 55.76<br>(51.98-59.02) | 100.00<br>(100.00-100.00)                                                                                 | 42.79<br>(34.54-55.99)    | 52.89<br>(41.98-67.68)    |
| Palestine    | 41.69<br>(36.89-46.08)           | 49.97<br>(46.34-52.78) | 62.42<br>(58.93-65.48) | 46.63<br>(35.50-51.71)                                            | 54.30<br>(48.01-58.20) | 61.23<br>(54.81-65.45) | 41.75<br>(38.59-47.56)                                               | 49.60<br>(45.65-52.77) | 63.13<br>(59.17-67.11) | 100.00<br>(100.00-100.00)                                                                                 | 54.77<br>(42.48-72.37)    | 100.00<br>(100.00-100.00) |
| Oman         | 43.89<br>(38.12-49.42)           | 55.38<br>(50.12-58.84) | 59.57<br>(56.35-62.35) | 33.83<br>(30.59-41.20)                                            | 53.48<br>(43.45-58.87) | 66.09<br>(59.45-70.36) | 52.01<br>(43.78-58.16)                                               | 56.28<br>(51.83-60.27) | 55.92<br>(52.00-59.20) | 100.00<br>(100.00-100.00)                                                                                 | 100.00<br>(100.00-100.00) | 40.55<br>(32.57-51.86)    |
| Qatar        | 51.31<br>(47.44-55.07)           | 53.99<br>(49.69-57.58) | 60.63<br>(56.72-65.00) | 55.40<br>(49.49-59.16)                                            | 61.17<br>(56.03-65.12) | 72.16<br>(66.84-75.69) | 49.13<br>(44.51-53.96)                                               | 50.65<br>(45.06-55.49) | 54.15<br>(48.82-59.62) | 100.00<br>(100.00-100.00)                                                                                 | 100.00<br>(100.00-100.00) | 100.00<br>(100.00-100.00) |
| Saudi Arabia | 52.86<br>(49.31-55.56)           | 56.71<br>(53.91-59.39) | 57.61<br>(54.27-61.61) | 46.83<br>(39.72-50.43)                                            | 55.29<br>(49.79-58.56) | 68.36<br>(63.80-71.38) | 56.12<br>(53.45-59.23)                                               | 56.77<br>(54.00-59.99) | 52.06<br>(47.96-57.12) | 100.00<br>(100.00-100.00)                                                                                 | 100.00<br>(100.00-100.00) | 47.52<br>(29.54-73.05)    |
| Sudan        | 24.74<br>(22.48-27.64)           | 26.16<br>(23.48-29.11) | 35.46<br>(31.33-38.64) | 11.87<br>(9.80-15.06)                                             | 15.10<br>(12.23-18.96) | 27.14<br>(20.80-31.54) | 37.10<br>(33.41-40.39)                                               | 35.68<br>(32.02-38.88) | 41.29<br>(37.42-44.86) | 100.00<br>(100.00-100.00)                                                                                 | 29.26<br>(23.57-36.36)    | 49.75<br>(38.19-63.40)    |

**Appendix Table 1a. Scaled values for each SDG health-related indicator and three summary indicators by country for 1990, 2000, and 2015**

| Location             | Geometric mean of all indicators |                        |                        | Geometric mean of all indicators with corresponding MDG indicator |                        |                        | Geometric mean of all indicators without corresponding MDG indicator |                        |                        | Indicator 1.5.1: Age-standardised death rate due to exposure to forces of nature (per 100,000 population) |                           |                           |
|----------------------|----------------------------------|------------------------|------------------------|-------------------------------------------------------------------|------------------------|------------------------|----------------------------------------------------------------------|------------------------|------------------------|-----------------------------------------------------------------------------------------------------------|---------------------------|---------------------------|
|                      | 1990                             | 2000                   | 2015                   | 1990                                                              | 2000                   | 2015                   | 1990                                                                 | 2000                   | 2015                   | 1990                                                                                                      | 2000                      | 2015                      |
| Syria                | 50.24<br>(44.89-52.94)           | 56.08<br>(50.86-58.65) | 54.40<br>(50.54-56.61) | 41.82<br>(31.55-46.16)                                            | 50.50<br>(40.52-54.61) | 58.79<br>(49.69-63.30) | 54.62<br>(51.61-57.27)                                               | 58.33<br>(55.46-60.97) | 52.47<br>(50.16-54.74) | 100.00<br>(100.00-100.00)                                                                                 | 100.00<br>(100.00-100.00) | 100.00<br>(100.00-100.00) |
| Tunisia              | 46.77<br>(41.69-49.46)           | 55.83<br>(49.44-58.52) | 57.33<br>(51.23-60.23) | 46.74<br>(34.92-51.77)                                            | 55.10<br>(40.53-60.13) | 63.43<br>(49.83-68.91) | 47.19<br>(44.38-49.76)                                               | 55.93<br>(52.73-58.58) | 54.52<br>(51.29-57.54) | 24.09<br>(19.52-32.48)                                                                                    | 100.00<br>(100.00-100.00) | 100.00<br>(100.00-100.00) |
| Turkey               | 41.47<br>(38.00-43.62)           | 45.38<br>(42.78-47.19) | 58.14<br>(55.50-60.43) | 42.55<br>(35.44-46.03)                                            | 52.05<br>(46.07-55.38) | 67.08<br>(61.05-70.91) | 42.96<br>(40.38-45.52)                                               | 44.09<br>(41.95-46.16) | 54.44<br>(52.04-57.19) | 36.27<br>(29.07-46.73)                                                                                    | 9.71<br>(7.13-13.31)      | 33.36<br>(27.34-44.26)    |
| United Arab Emirates | 49.14<br>(44.89-52.60)           | 55.58<br>(52.49-58.42) | 61.55<br>(58.36-64.54) | 49.06<br>(42.54-53.62)                                            | 59.74<br>(54.53-63.62) | 69.26<br>(64.59-73.42) | 50.59<br>(45.03-54.88)                                               | 54.91<br>(50.67-58.25) | 58.44<br>(53.69-62.38) | 100.00<br>(100.00-100.00)                                                                                 | 100.00<br>(100.00-100.00) | 100.00<br>(100.00-100.00) |
| Yemen                | 29.45<br>(25.47-33.01)           | 30.79<br>(26.72-34.38) | 37.48<br>(32.70-40.95) | 15.09<br>(12.41-18.28)                                            | 18.98<br>(15.80-22.63) | 33.75<br>(26.24-37.98) | 42.26<br>(36.41-47.14)                                               | 40.38<br>(34.26-45.05) | 39.77<br>(34.48-43.97) | 100.00<br>(100.00-100.00)                                                                                 | 22.49<br>(18.29-30.09)    | 53.23<br>(42.17-68.23)    |
| Bangladesh           | 20.07<br>(17.32-22.63)           | 27.14<br>(23.27-30.45) | 37.74<br>(33.27-40.73) | 9.71<br>(7.10-12.28)                                              | 20.29<br>(15.58-23.40) | 35.97<br>(26.52-40.22) | 31.08<br>(28.03-33.96)                                               | 32.28<br>(27.44-36.25) | 38.79<br>(35.22-42.19) | 18.66<br>(15.65-22.10)                                                                                    | 22.93<br>(19.28-26.89)    | 51.93<br>(42.05-61.52)    |
| Bhutan               | 36.79<br>(33.79-39.76)           | 38.81<br>(36.67-40.87) | 55.10<br>(52.64-57.60) | 24.18<br>(19.38-28.48)                                            | 35.91<br>(32.07-39.20) | 56.08<br>(53.43-58.62) | 43.33<br>(39.83-46.86)                                               | 38.97<br>(35.97-41.83) | 51.43<br>(47.84-54.67) | 100.00<br>(100.00-100.00)                                                                                 | 8.49<br>(6.64-10.46)      | 100.00<br>(100.00-100.00) |
| India                | 26.63<br>(24.36-28.63)           | 30.79<br>(28.80-32.50) | 41.70<br>(39.68-43.77) | 17.56<br>(15.07-19.66)                                            | 24.22<br>(21.60-26.19) | 39.64<br>(36.55-42.08) | 33.01<br>(30.23-36.05)                                               | 34.97<br>(32.38-37.45) | 42.39<br>(39.88-44.93) | 35.37<br>(19.55-76.80)                                                                                    | 24.64<br>(16.86-33.63)    | 36.09<br>(26.68-53.12)    |
| Nepal                | 19.46<br>(16.88-22.11)           | 25.59<br>(22.77-27.69) | 35.84<br>(32.62-38.40) | 7.12<br>(5.46-9.09)                                               | 20.11<br>(15.38-22.43) | 38.15<br>(31.43-41.65) | 32.22<br>(28.18-35.34)                                               | 29.37<br>(26.50-31.85) | 34.89<br>(31.83-37.74) | 32.73<br>(27.57-38.77)                                                                                    | 16.40<br>(13.68-19.55)    | 8.83<br>(6.95-10.85)      |
| Pakistan             | 29.46<br>(26.08-31.75)           | 32.74<br>(29.10-34.95) | 38.04<br>(34.02-40.42) | 16.23<br>(12.41-18.64)                                            | 23.56<br>(17.74-26.35) | 36.00<br>(26.89-39.54) | 40.86<br>(38.10-44.00)                                               | 39.84<br>(37.14-42.64) | 39.71<br>(36.69-42.72) | 100.00<br>(100.00-100.00)                                                                                 | 27.97<br>(23.65-32.92)    | 27.90<br>(23.59-32.85)    |
| Botswana             | 38.62<br>(29.45-44.53)           | 38.23<br>(20.89-46.74) | 46.23<br>(28.74-53.43) | 26.87<br>(20.05-29.87)                                            | 26.54<br>(21.20-29.91) | 41.41<br>(35.68-45.04) | 44.19<br>(31.88-52.12)                                               | 43.70<br>(20.89-55.43) | 46.62<br>(25.30-55.76) | 100.00<br>(100.00-100.00)                                                                                 | 100.00<br>(100.00-100.00) | 37.64<br>(29.42-49.34)    |

**Appendix Table 1a. Scaled values for each SDG health-related indicator and three summary indicators by country for 1990, 2000, and 2015**

| Location      | Geometric mean of all indicators |                        |                        | Geometric mean of all indicators with corresponding MDG indicator |                        |                        | Geometric mean of all indicators without corresponding MDG indicator |                        |                        | Indicator 1.5.1: Age-standardised death rate due to exposure to forces of nature (per 100,000 population) |                           |                           |
|---------------|----------------------------------|------------------------|------------------------|-------------------------------------------------------------------|------------------------|------------------------|----------------------------------------------------------------------|------------------------|------------------------|-----------------------------------------------------------------------------------------------------------|---------------------------|---------------------------|
|               | 1990                             | 2000                   | 2015                   | 1990                                                              | 2000                   | 2015                   | 1990                                                                 | 2000                   | 2015                   | 1990                                                                                                      | 2000                      | 2015                      |
| Lesotho       | 28.80<br>(25.50-32.06)           | 31.71<br>(27.31-35.23) | 32.02<br>(22.35-38.81) | 18.64<br>(14.92-22.49)                                            | 19.21<br>(14.98-22.19) | 28.37<br>(21.75-31.87) | 34.62<br>(30.86-38.30)                                               | 38.85<br>(34.04-43.00) | 33.60<br>(21.82-42.57) | 16.44<br>(12.38-22.62)                                                                                    | 100.00<br>(100.00-100.00) | 29.09<br>(22.63-38.36)    |
| Namibia       | 36.32<br>(32.30-38.88)           | 33.90<br>(29.74-36.84) | 44.88<br>(40.29-48.53) | 26.13<br>(20.28-29.18)                                            | 27.66<br>(21.86-30.35) | 41.00<br>(35.81-44.34) | 42.67<br>(39.36-45.68)                                               | 37.57<br>(33.19-41.55) | 46.14<br>(40.46-50.96) | 100.00<br>(100.00-100.00)                                                                                 | 100.00<br>(100.00-100.00) | 18.55<br>(14.01-25.65)    |
| South Africa  | 35.40<br>(33.06-37.45)           | 38.18<br>(35.93-40.40) | 45.99<br>(44.15-47.77) | 38.00<br>(34.16-40.37)                                            | 39.20<br>(36.21-41.33) | 48.92<br>(45.91-51.34) | 34.21<br>(31.20-36.81)                                               | 37.22<br>(34.44-40.03) | 42.92<br>(40.26-45.49) | 53.60<br>(29.00-65.85)                                                                                    | 21.24<br>(17.91-25.23)    | 26.59<br>(22.51-30.47)    |
| Swaziland     | 34.11<br>(29.92-38.39)           | 35.51<br>(30.38-39.96) | 38.23<br>(28.16-45.87) | 26.41<br>(22.10-31.35)                                            | 25.92<br>(20.57-29.18) | 35.76<br>(26.91-39.68) | 38.09<br>(33.37-42.63)                                               | 40.24<br>(33.76-46.15) | 38.67<br>(25.93-48.70) | 100.00<br>(100.00-100.00)                                                                                 | 100.00<br>(100.00-100.00) | 32.45<br>(25.44-42.65)    |
| Zimbabwe      | 35.16<br>(31.26-38.36)           | 33.86<br>(27.16-37.66) | 39.53<br>(34.25-43.61) | 29.20<br>(22.75-32.11)                                            | 29.56<br>(24.97-32.00) | 36.64<br>(31.62-39.84) | 37.80<br>(33.61-42.07)                                               | 35.85<br>(26.85-41.04) | 40.61<br>(34.91-45.55) | 100.00<br>(100.00-100.00)                                                                                 | 32.53<br>(26.50-41.96)    | 30.72<br>(24.64-38.58)    |
| Benin         | 22.52<br>(20.53-25.06)           | 24.94<br>(22.17-27.49) | 33.83<br>(29.18-38.04) | 11.64<br>(9.37-14.66)                                             | 14.86<br>(11.82-17.78) | 23.33<br>(17.77-27.51) | 30.64<br>(28.84-32.81)                                               | 31.02<br>(28.52-33.42) | 37.14<br>(32.11-41.77) | 100.00<br>(100.00-100.00)                                                                                 | 50.99<br>(38.83-66.35)    | 100.00<br>(100.00-100.00) |
| Burkina Faso  | 19.14<br>(17.87-20.56)           | 21.91<br>(20.30-24.18) | 31.05<br>(27.20-34.99) | 8.19<br>(7.11-9.40)                                               | 10.78<br>(9.18-13.24)  | 20.72<br>(16.91-25.46) | 29.07<br>(27.35-30.83)                                               | 30.06<br>(28.43-31.97) | 35.46<br>(31.66-39.07) | 100.00<br>(100.00-100.00)                                                                                 | 100.00<br>(100.00-100.00) | 57.59<br>(48.18-68.02)    |
| Cameroon      | 22.25<br>(20.13-24.85)           | 23.89<br>(21.65-26.66) | 31.11<br>(27.28-34.66) | 12.43<br>(10.58-15.22)                                            | 14.54<br>(12.56-17.57) | 25.84<br>(20.18-30.07) | 29.86<br>(27.03-33.11)                                               | 30.67<br>(27.71-33.86) | 33.80<br>(29.72-37.92) | 100.00<br>(100.00-100.00)                                                                                 | 52.84<br>(44.39-65.09)    | 57.01<br>(47.05-67.99)    |
| Cape Verde    | 38.11<br>(34.44-41.58)           | 42.97<br>(38.18-46.55) | 52.73<br>(47.10-55.63) | 26.05<br>(20.89-31.12)                                            | 35.62<br>(27.37-40.53) | 50.37<br>(39.51-55.00) | 43.74<br>(40.22-47.26)                                               | 45.34<br>(41.26-49.35) | 51.64<br>(48.19-55.04) | 100.00<br>(100.00-100.00)                                                                                 | 100.00<br>(100.00-100.00) | 100.00<br>(100.00-100.00) |
| Chad          | 15.29<br>(14.02-16.68)           | 17.01<br>(15.81-18.27) | 23.90<br>(20.88-27.02) | 4.89<br>(4.14-5.86)                                               | 6.42<br>(5.80-7.06)    | 14.87<br>(12.30-18.48) | 28.34<br>(26.49-30.32)                                               | 27.96<br>(25.82-30.26) | 30.16<br>(25.99-34.13) | 100.00<br>(100.00-100.00)                                                                                 | 100.00<br>(100.00-100.00) | 52.12<br>(42.60-63.35)    |
| Cote d'Ivoire | 26.03<br>(23.58-28.87)           | 27.16<br>(23.67-29.93) | 35.43<br>(30.81-39.43) | 13.00<br>(10.85-15.81)                                            | 17.65<br>(13.82-20.70) | 24.72<br>(18.96-28.84) | 35.77<br>(32.76-38.71)                                               | 33.20<br>(30.06-36.31) | 40.85<br>(35.97-45.19) | 100.00<br>(100.00-100.00)                                                                                 | 49.84<br>(41.11-60.38)    | 48.66<br>(39.99-59.86)    |

**Appendix Table 1a. Scaled values for each SDG health-related indicator and three summary indicators by country for 1990, 2000, and 2015**

| Location              | Geometric mean of all indicators |                        |                        | Geometric mean of all indicators with corresponding MDG indicator |                        |                        | Geometric mean of all indicators without corresponding MDG indicator |                        |                        | Indicator 1.5.1: Age-standardised death rate due to exposure to forces of nature (per 100,000 population) |                           |                           |
|-----------------------|----------------------------------|------------------------|------------------------|-------------------------------------------------------------------|------------------------|------------------------|----------------------------------------------------------------------|------------------------|------------------------|-----------------------------------------------------------------------------------------------------------|---------------------------|---------------------------|
|                       | 1990                             | 2000                   | 2015                   | 1990                                                              | 2000                   | 2015                   | 1990                                                                 | 2000                   | 2015                   | 1990                                                                                                      | 2000                      | 2015                      |
| The Gambia            | 27.24<br>(23.02-31.00)           | 25.86<br>(22.01-28.87) | 35.93<br>(30.89-39.95) | 16.77<br>(13.56-20.49)                                            | 21.94<br>(17.35-25.95) | 30.66<br>(23.96-35.90) | 33.97<br>(28.00-37.70)                                               | 28.09<br>(22.96-31.16) | 37.90<br>(31.23-42.26) | 100.00<br>(100.00-100.00)                                                                                 | 18.50<br>(13.41-24.34)    | 100.00<br>(100.00-100.00) |
| Ghana                 | 26.93<br>(24.59-29.72)           | 29.84<br>(26.92-32.48) | 42.72<br>(37.14-47.17) | 13.14<br>(11.49-15.92)                                            | 18.28<br>(15.07-21.44) | 30.31<br>(23.46-35.27) | 37.70<br>(34.13-41.18)                                               | 37.40<br>(34.36-40.26) | 49.13<br>(44.13-53.90) | 100.00<br>(100.00-100.00)                                                                                 | 44.77<br>(36.74-54.13)    | 100.00<br>(100.00-100.00) |
| Guinea                | 20.48<br>(18.91-22.05)           | 21.53<br>(20.02-23.56) | 29.47<br>(25.91-32.70) | 8.22<br>(6.91-9.58)                                               | 11.25<br>(9.92-13.45)  | 21.13<br>(16.31-24.81) | 33.05<br>(31.19-35.11)                                               | 29.83<br>(28.02-31.76) | 33.16<br>(30.12-36.27) | 100.00<br>(100.00-100.00)                                                                                 | 100.00<br>(100.00-100.00) | 100.00<br>(100.00-100.00) |
| Guinea-Bissau         | 22.45<br>(17.35-26.00)           | 23.81<br>(18.14-27.87) | 29.03<br>(19.93-34.68) | 11.43<br>(9.48-13.81)                                             | 13.53<br>(11.33-16.63) | 21.02<br>(16.78-26.00) | 31.84<br>(23.58-36.82)                                               | 31.76<br>(22.97-36.96) | 33.38<br>(22.11-39.36) | 100.00<br>(100.00-100.00)                                                                                 | 100.00<br>(100.00-100.00) | 100.00<br>(100.00-100.00) |
| Liberia               | 20.63<br>(18.55-22.98)           | 22.16<br>(20.48-24.33) | 33.39<br>(29.46-36.97) | 12.95<br>(10.48-16.28)                                            | 13.45<br>(11.35-16.56) | 25.10<br>(20.25-29.97) | 25.60<br>(22.81-28.17)                                               | 27.70<br>(25.93-29.62) | 36.26<br>(32.91-39.22) | 100.00<br>(100.00-100.00)                                                                                 | 40.71<br>(30.81-53.94)    | 100.00<br>(100.00-100.00) |
| Mali                  | 17.08<br>(15.93-18.46)           | 19.46<br>(18.06-21.23) | 25.96<br>(23.12-28.82) | 7.14<br>(6.16-8.41)                                               | 10.78<br>(9.43-12.93)  | 18.17<br>(14.75-21.85) | 27.30<br>(25.96-28.66)                                               | 26.50<br>(24.96-28.15) | 30.05<br>(27.38-32.73) | 100.00<br>(100.00-100.00)                                                                                 | 54.08<br>(43.23-65.27)    | 47.14<br>(38.49-57.82)    |
| Mauritania            | 23.02<br>(20.76-25.78)           | 29.82<br>(26.28-33.18) | 37.99<br>(33.08-42.33) | 11.42<br>(9.48-14.44)                                             | 15.38<br>(12.42-18.74) | 24.89<br>(19.47-30.30) | 33.16<br>(29.71-36.66)                                               | 40.87<br>(35.19-44.60) | 46.33<br>(40.36-50.84) | 100.00<br>(100.00-100.00)                                                                                 | 100.00<br>(100.00-100.00) | 100.00<br>(100.00-100.00) |
| Niger                 | 12.54<br>(11.35-14.35)           | 17.03<br>(15.77-19.15) | 22.78<br>(20.56-25.34) | 4.12<br>(3.41-4.98)                                               | 6.41<br>(5.85-7.06)    | 13.43<br>(11.24-16.80) | 23.68<br>(21.64-28.10)                                               | 27.82<br>(25.36-32.23) | 28.37<br>(25.80-30.80) | 100.00<br>(100.00-100.00)                                                                                 | 100.00<br>(100.00-100.00) | 31.09<br>(25.12-37.64)    |
| Nigeria               | 23.22<br>(21.22-25.61)           | 24.28<br>(22.63-26.71) | 34.46<br>(30.70-37.70) | 10.38<br>(9.09-12.38)                                             | 12.31<br>(10.90-14.79) | 23.40<br>(18.72-27.40) | 35.98<br>(32.15-39.81)                                               | 35.01<br>(32.25-37.92) | 41.50<br>(38.01-44.57) | 100.00<br>(100.00-100.00)                                                                                 | 52.28<br>(42.75-62.83)    | 41.80<br>(33.36-50.18)    |
| Sao Tome and Principe | 33.64<br>(29.71-36.98)           | 37.86<br>(33.67-41.23) | 46.92<br>(41.23-51.37) | 22.30<br>(17.41-26.38)                                            | 27.54<br>(21.38-31.81) | 39.27<br>(29.58-44.44) | 39.85<br>(36.33-43.15)                                               | 42.43<br>(39.13-45.69) | 48.34<br>(43.37-53.06) | 100.00<br>(100.00-100.00)                                                                                 | 100.00<br>(100.00-100.00) | 100.00<br>(100.00-100.00) |
| Senegal               | 27.84<br>(24.94-30.40)           | 30.71<br>(27.49-32.96) | 41.10<br>(36.02-45.23) | 16.34<br>(13.18-18.99)                                            | 21.35<br>(16.63-24.22) | 34.90<br>(26.43-38.92) | 36.28<br>(33.62-39.31)                                               | 36.04<br>(33.61-38.31) | 42.30<br>(37.58-47.01) | 100.00<br>(100.00-100.00)                                                                                 | 24.66<br>(18.62-31.45)    | 54.40<br>(45.82-65.39)    |

**Appendix Table 1a. Scaled values for each SDG health-related indicator and three summary indicators by country for 1990, 2000, and 2015**

| Location     | Geometric mean of all indicators |                        |                        | Geometric mean of all indicators with corresponding MDG indicator |                        |                        | Geometric mean of all indicators without corresponding MDG indicator |                        |                        | Indicator 1.5.1: Age-standardised death rate due to exposure to forces of nature (per 100,000 population) |                           |                           |
|--------------|----------------------------------|------------------------|------------------------|-------------------------------------------------------------------|------------------------|------------------------|----------------------------------------------------------------------|------------------------|------------------------|-----------------------------------------------------------------------------------------------------------|---------------------------|---------------------------|
|              | 1990                             | 2000                   | 2015                   | 1990                                                              | 2000                   | 2015                   | 1990                                                                 | 2000                   | 2015                   | 1990                                                                                                      | 2000                      | 2015                      |
| Sierra Leone | 21.62<br>(19.44-24.31)           | 18.58<br>(16.94-20.47) | 26.78<br>(23.81-30.05) | 10.52<br>(8.83-13.17)                                             | 11.41<br>(10.03-13.85) | 20.20<br>(17.22-24.69) | 30.29<br>(26.29-34.18)                                               | 23.73<br>(21.38-26.04) | 30.00<br>(27.06-33.00) | 100.00<br>(100.00-100.00)                                                                                 | 34.24<br>(24.30-41.75)    | 41.76<br>(34.37-52.06)    |
| Togo         | 23.48<br>(21.82-25.52)           | 25.13<br>(23.13-27.69) | 34.35<br>(30.04-38.35) | 12.76<br>(11.16-15.24)                                            | 14.99<br>(13.22-18.30) | 25.25<br>(20.46-30.38) | 32.03<br>(29.91-34.43)                                               | 32.39<br>(29.64-35.04) | 38.65<br>(34.39-42.86) | 100.00<br>(100.00-100.00)                                                                                 | 100.00<br>(100.00-100.00) | 100.00<br>(100.00-100.00) |
| Burundi      | 18.47<br>(14.38-21.89)           | 18.61<br>(16.43-20.77) | 25.83<br>(22.40-29.26) | 11.24<br>(8.91-14.11)                                             | 12.67<br>(10.34-15.70) | 22.71<br>(18.32-27.64) | 23.37<br>(17.50-27.88)                                               | 22.22<br>(19.79-24.33) | 26.60<br>(23.22-29.69) | 100.00<br>(100.00-100.00)                                                                                 | 100.00<br>(100.00-100.00) | 29.99<br>(23.85-36.13)    |
| Comoros      | 30.87<br>(25.83-34.71)           | 34.17<br>(30.26-36.85) | 42.38<br>(37.17-46.13) | 20.02<br>(15.05-23.28)                                            | 21.43<br>(16.03-24.50) | 30.73<br>(23.07-35.11) | 36.27<br>(30.76-41.42)                                               | 39.41<br>(35.95-42.79) | 44.67<br>(39.58-49.53) | 100.00<br>(100.00-100.00)                                                                                 | 100.00<br>(100.00-100.00) | 100.00<br>(100.00-100.00) |
| Djibouti     | 36.71<br>(32.33-40.58)           | 37.87<br>(32.19-42.44) | 43.13<br>(36.68-48.23) | 23.08<br>(18.08-27.16)                                            | 25.78<br>(19.74-29.82) | 36.15<br>(27.01-41.40) | 44.20<br>(39.67-48.62)                                               | 43.30<br>(35.96-49.23) | 43.21<br>(36.19-49.24) | 100.00<br>(100.00-100.00)                                                                                 | 100.00<br>(100.00-100.00) | 100.00<br>(100.00-100.00) |
| Eritrea      | 22.02<br>(19.66-24.79)           | 27.19<br>(23.85-30.27) | 34.81<br>(28.89-39.83) | 10.25<br>(8.28-12.97)                                             | 17.90<br>(14.29-20.91) | 25.28<br>(19.73-29.78) | 32.48<br>(29.15-36.05)                                               | 33.15<br>(29.08-37.16) | 39.14<br>(32.02-45.66) | 100.00<br>(100.00-100.00)                                                                                 | 100.00<br>(100.00-100.00) | 100.00<br>(100.00-100.00) |
| Ethiopia     | 14.71<br>(13.01-16.62)           | 18.35<br>(16.98-20.02) | 29.70<br>(26.00-32.95) | 6.08<br>(4.69-7.67)                                               | 8.29<br>(7.20-9.83)    | 23.22<br>(18.14-26.81) | 23.84<br>(21.41-26.27)                                               | 27.04<br>(25.00-28.96) | 31.51<br>(28.00-35.07) | 100.00<br>(100.00-100.00)                                                                                 | 36.68<br>(28.55-44.15)    | 100.00<br>(100.00-100.00) |
| Kenya        | 32.37<br>(30.63-33.91)           | 33.44<br>(31.73-34.99) | 39.57<br>(37.74-41.36) | 22.07<br>(20.36-23.50)                                            | 25.39<br>(23.86-26.80) | 36.31<br>(34.13-38.28) | 37.21<br>(34.37-39.80)                                               | 36.91<br>(34.09-39.56) | 39.50<br>(36.86-42.11) | 100.00<br>(100.00-100.00)                                                                                 | 41.36<br>(29.87-59.08)    | 36.71<br>(27.93-47.31)    |
| Madagascar   | 23.86<br>(21.98-25.78)           | 24.75<br>(22.95-26.79) | 27.94<br>(24.85-30.70) | 13.23<br>(11.01-15.38)                                            | 16.53<br>(14.76-18.33) | 22.97<br>(18.79-25.90) | 28.45<br>(25.37-31.65)                                               | 27.60<br>(25.02-30.47) | 28.69<br>(25.00-32.17) | 100.00<br>(100.00-100.00)                                                                                 | 23.26<br>(18.43-26.99)    | 27.66<br>(23.21-31.91)    |
| Malawi       | 22.19<br>(19.87-24.33)           | 25.83<br>(22.74-28.39) | 32.15<br>(28.63-34.86) | 11.28<br>(9.00-13.32)                                             | 14.05<br>(11.12-15.97) | 24.96<br>(19.49-27.97) | 28.96<br>(26.40-31.73)                                               | 31.53<br>(28.05-34.55) | 33.21<br>(29.91-36.34) | 100.00<br>(100.00-100.00)                                                                                 | 100.00<br>(100.00-100.00) | 26.00<br>(20.59-32.05)    |
| Mozambique   | 17.77<br>(16.58-19.40)           | 19.36<br>(17.93-21.07) | 28.16<br>(24.01-31.86) | 7.85<br>(6.64-8.99)                                               | 11.13<br>(10.22-12.84) | 22.06<br>(17.49-25.33) | 25.94<br>(24.17-28.34)                                               | 24.53<br>(22.48-26.61) | 29.56<br>(25.32-33.91) | 100.00<br>(100.00-100.00)                                                                                 | 17.41<br>(14.23-21.14)    | 32.15<br>(27.27-37.51)    |

**Appendix Table 1a. Scaled values for each SDG health-related indicator and three summary indicators by country for 1990, 2000, and 2015**

| Location                         | Geometric mean of all indicators |                        |                        | Geometric mean of all indicators with corresponding MDG indicator |                        |                        | Geometric mean of all indicators without corresponding MDG indicator |                        |                        | Indicator 1.5.1: Age-standardised death rate due to exposure to forces of nature (per 100,000 population) |                           |                           |
|----------------------------------|----------------------------------|------------------------|------------------------|-------------------------------------------------------------------|------------------------|------------------------|----------------------------------------------------------------------|------------------------|------------------------|-----------------------------------------------------------------------------------------------------------|---------------------------|---------------------------|
|                                  | 1990                             | 2000                   | 2015                   | 1990                                                              | 2000                   | 2015                   | 1990                                                                 | 2000                   | 2015                   | 1990                                                                                                      | 2000                      | 2015                      |
| Rwanda                           | 20.03<br>(18.19-21.79)           | 21.90<br>(19.98-23.70) | 33.06<br>(29.92-35.74) | 17.66<br>(15.06-20.04)                                            | 19.43<br>(17.08-21.68) | 37.80<br>(34.23-41.02) | 21.15<br>(18.88-23.09)                                               | 22.93<br>(20.43-25.19) | 28.55<br>(25.06-31.76) | 100.00<br>(100.00-100.00)                                                                                 | 100.00<br>(100.00-100.00) | 54.85<br>(41.93-65.81)    |
| Somalia                          | 18.19<br>(13.55-22.08)           | 16.42<br>(12.23-20.14) | 21.67<br>(15.76-25.93) | 10.97<br>(8.59-13.81)                                             | 10.32<br>(7.74-13.36)  | 19.09<br>(14.73-22.80) | 25.17<br>(18.43-30.16)                                               | 22.36<br>(16.67-27.11) | 23.57<br>(16.92-28.39) | 100.00<br>(100.00-100.00)                                                                                 | 8.61<br>(6.45-11.72)      | 24.60<br>(18.28-29.63)    |
| South Sudan                      | 18.97<br>(14.68-22.34)           | 22.45<br>(17.26-26.50) | 22.50<br>(15.52-26.65) | 9.81<br>(7.50-12.47)                                              | 11.60<br>(9.23-14.50)  | 17.86<br>(12.71-22.34) | 25.98<br>(19.10-30.38)                                               | 29.82<br>(22.24-34.52) | 24.29<br>(16.56-28.82) | 100.00<br>(100.00-100.00)                                                                                 | 100.00<br>(100.00-100.00) | 27.56<br>(16.45-32.62)    |
| Tanzania                         | 24.38<br>(22.78-26.08)           | 28.01<br>(25.98-29.83) | 36.27<br>(32.41-39.79) | 16.06<br>(14.20-17.78)                                            | 18.30<br>(16.69-19.85) | 29.40<br>(26.69-32.09) | 28.46<br>(26.36-30.78)                                               | 32.29<br>(29.39-35.10) | 37.45<br>(32.41-42.07) | 19.82<br>(15.76-24.83)                                                                                    | 36.42<br>(30.56-42.02)    | 57.56<br>(45.65-69.28)    |
| Uganda                           | 20.50<br>(18.80-22.25)           | 21.31<br>(19.59-23.01) | 30.80<br>(27.51-34.11) | 15.51<br>(13.25-17.45)                                            | 18.84<br>(17.04-20.55) | 32.78<br>(29.97-35.35) | 23.28<br>(21.31-25.50)                                               | 22.37<br>(20.12-24.75) | 28.70<br>(24.56-32.83) | 100.00<br>(100.00-100.00)                                                                                 | 35.87<br>(23.34-44.01)    | 53.07<br>(41.11-63.34)    |
| Zambia                           | 26.75<br>(24.11-29.43)           | 27.87<br>(25.51-30.00) | 36.93<br>(32.88-40.68) | 18.54<br>(16.07-20.72)                                            | 19.79<br>(17.68-21.50) | 35.88<br>(33.10-38.33) | 31.43<br>(27.54-35.41)                                               | 31.50<br>(28.02-34.57) | 34.60<br>(29.46-39.29) | 100.00<br>(100.00-100.00)                                                                                 | 100.00<br>(100.00-100.00) | 100.00<br>(100.00-100.00) |
| Angola                           | 17.57<br>(11.80-21.52)           | 21.04<br>(14.88-25.39) | 31.62<br>(20.29-37.68) | 10.02<br>(8.06-12.51)                                             | 13.39<br>(10.75-16.46) | 25.34<br>(19.94-30.66) | 24.51<br>(15.37-30.47)                                               | 26.87<br>(18.08-32.35) | 33.54<br>(20.27-39.81) | 100.00<br>(100.00-100.00)                                                                                 | 41.75<br>(34.21-52.60)    | 32.15<br>(24.93-43.04)    |
| Central African Republic         | 18.18<br>(16.24-20.11)           | 18.90<br>(14.87-22.58) | 20.42<br>(15.40-24.91) | 9.01<br>(7.65-10.48)                                              | 10.17<br>(8.18-12.84)  | 14.84<br>(11.83-19.03) | 26.18<br>(23.20-28.83)                                               | 25.94<br>(19.58-31.07) | 23.81<br>(16.91-29.01) | 100.00<br>(100.00-100.00)                                                                                 | 100.00<br>(100.00-100.00) | 100.00<br>(100.00-100.00) |
| Congo                            | 25.41<br>(22.28-28.82)           | 24.82<br>(21.63-27.68) | 35.60<br>(30.07-39.81) | 16.95<br>(13.52-20.80)                                            | 18.30<br>(14.41-21.86) | 28.58<br>(22.10-33.07) | 29.39<br>(26.05-32.61)                                               | 27.78<br>(24.69-30.61) | 37.01<br>(31.77-41.38) | 100.00<br>(100.00-100.00)                                                                                 | 100.00<br>(100.00-100.00) | 43.48<br>(35.95-54.24)    |
| Democratic Republic of the Congo | 19.66<br>(17.51-22.10)           | 19.31<br>(17.55-21.39) | 24.12<br>(21.28-27.38) | 12.11<br>(9.99-14.96)                                             | 12.39<br>(10.71-15.22) | 20.40<br>(17.25-24.84) | 24.24<br>(21.61-26.76)                                               | 23.61<br>(21.28-25.75) | 25.34<br>(22.18-28.56) | 100.00<br>(100.00-100.00)                                                                                 | 100.00<br>(100.00-100.00) | 48.30<br>(40.88-58.71)    |
| Equatorial Guinea                | 20.22<br>(12.44-25.15)           | 25.02<br>(16.86-30.45) | 35.85<br>(24.22-41.75) | 12.58<br>(10.50-14.40)                                            | 17.60<br>(14.52-21.94) | 31.42<br>(23.48-37.18) | 26.33<br>(14.91-33.89)                                               | 30.02<br>(19.00-36.58) | 36.07<br>(24.16-42.50) | 100.00<br>(100.00-100.00)                                                                                 | 100.00<br>(100.00-100.00) | 100.00<br>(100.00-100.00) |

**Appendix Table 1a. Scaled values for each SDG health-related indicator and three summary indicators by country for 1990, 2000, and 2015**

| Location | Geometric mean of all indicators |                        |                        | Geometric mean of all indicators with corresponding MDG indicator |                        |                        | Geometric mean of all indicators without corresponding MDG indicator |                        |                        | Indicator 1.5.1: Age-standardised death rate due to exposure to forces of nature (per 100,000 population) |                           |                           |
|----------|----------------------------------|------------------------|------------------------|-------------------------------------------------------------------|------------------------|------------------------|----------------------------------------------------------------------|------------------------|------------------------|-----------------------------------------------------------------------------------------------------------|---------------------------|---------------------------|
|          | 1990                             | 2000                   | 2015                   | 1990                                                              | 2000                   | 2015                   | 1990                                                                 | 2000                   | 2015                   | 1990                                                                                                      | 2000                      | 2015                      |
| Gabon    | 30.26<br>(26.61-33.56)           | 34.57<br>(30.58-37.53) | 43.80<br>(38.75-47.66) | 19.87<br>(15.37-23.42)                                            | 23.19<br>(17.67-26.48) | 36.76<br>(27.83-40.79) | 35.93<br>(31.90-39.75)                                               | 40.14<br>(36.54-43.62) | 44.27<br>(38.92-48.66) | 100.00<br>(100.00-100.00)                                                                                 | 100.00<br>(100.00-100.00) | 100.00<br>(100.00-100.00) |

**Appendix Table 1a. Scaled values for each SDG health-related indicator and three summary indicators by country for 1990, 2000, and 2015**

| Location      | Indicator 2.2.1: Prevalence of stunting among children under 5 years of age |                           |                           | Indicator 2.2.2a: Prevalence of wasting among children under 5 years of age |                           |                           | Indicator 2.2.2b: Prevalence of overweight among children aged 2 to 4 years |                        |                        | Indicator 3.1.1: Maternal mortality ratio (maternal deaths per 100,000 live births) |                        |                        |
|---------------|-----------------------------------------------------------------------------|---------------------------|---------------------------|-----------------------------------------------------------------------------|---------------------------|---------------------------|-----------------------------------------------------------------------------|------------------------|------------------------|-------------------------------------------------------------------------------------|------------------------|------------------------|
|               | 1990                                                                        | 2000                      | 2015                      | 1990                                                                        | 2000                      | 2015                      | 1990                                                                        | 2000                   | 2015                   | 1990                                                                                | 2000                   | 2015                   |
| Canada        | 100.00<br>(100.00-100.00)                                                   | 100.00<br>(100.00-100.00) | 100.00<br>(100.00-100.00) | 100.00<br>(100.00-100.00)                                                   | 100.00<br>(100.00-100.00) | 100.00<br>(100.00-100.00) | 57.53<br>(43.21-69.96)                                                      | 40.11<br>(23.18-55.58) | 33.67<br>(17.23-49.97) | 75.32<br>(72.72-78.09)                                                              | 72.48<br>(69.63-75.17) | 73.23<br>(70.89-75.67) |
| United States | 100.00<br>(100.00-100.00)                                                   | 100.00<br>(100.00-100.00) | 100.00<br>(100.00-100.00) | 100.00<br>(100.00-100.00)                                                   | 100.00<br>(100.00-100.00) | 100.00<br>(100.00-100.00) | 78.21<br>(73.07-82.99)                                                      | 72.20<br>(66.27-77.57) | 68.66<br>(60.05-76.29) | 62.78<br>(60.38-65.65)                                                              | 62.39<br>(59.94-65.35) | 57.63<br>(55.01-60.80) |
| Australia     | 100.00<br>(100.00-100.00)                                                   | 100.00<br>(100.00-100.00) | 100.00<br>(100.00-100.00) | 100.00<br>(100.00-100.00)                                                   | 100.00<br>(100.00-100.00) | 100.00<br>(100.00-100.00) | 76.89<br>(68.41-84.17)                                                      | 73.81<br>(68.76-78.76) | 62.85<br>(49.10-73.92) | 72.50<br>(69.66-75.47)                                                              | 72.35<br>(69.52-75.06) | 76.05<br>(73.21-79.12) |
| New Zealand   | 100.00<br>(100.00-100.00)                                                   | 100.00<br>(100.00-100.00) | 100.00<br>(100.00-100.00) | 100.00<br>(100.00-100.00)                                                   | 100.00<br>(100.00-100.00) | 100.00<br>(100.00-100.00) | 47.88<br>(31.29-63.52)                                                      | 49.41<br>(32.92-64.38) | 53.32<br>(40.02-65.47) | 66.24<br>(63.06-69.41)                                                              | 68.76<br>(65.75-71.92) | 66.86<br>(63.89-70.15) |
| Brunei        | 100.00<br>(100.00-100.00)                                                   | 100.00<br>(100.00-100.00) | 100.00<br>(100.00-100.00) | 100.00<br>(100.00-100.00)                                                   | 100.00<br>(100.00-100.00) | 100.00<br>(100.00-100.00) | 86.23<br>(80.25-91.30)                                                      | 81.11<br>(72.70-87.87) | 73.96<br>(64.08-81.99) | 49.65<br>(45.50-54.27)                                                              | 51.70<br>(47.77-55.82) | 54.25<br>(50.16-58.39) |
| Japan         | 100.00<br>(100.00-100.00)                                                   | 100.00<br>(100.00-100.00) | 100.00<br>(100.00-100.00) | 100.00<br>(100.00-100.00)                                                   | 100.00<br>(100.00-100.00) | 100.00<br>(100.00-100.00) | 90.35<br>(87.76-92.88)                                                      | 87.07<br>(82.77-90.74) | 83.35<br>(76.95-88.76) | 66.00<br>(63.69-68.54)                                                              | 70.54<br>(68.38-72.89) | 74.35<br>(72.16-76.56) |
| Singapore     | 100.00<br>(100.00-100.00)                                                   | 100.00<br>(100.00-100.00) | 100.00<br>(100.00-100.00) | 100.00<br>(100.00-100.00)                                                   | 100.00<br>(100.00-100.00) | 100.00<br>(100.00-100.00) | 76.44<br>(67.21-84.29)                                                      | 69.11<br>(58.09-78.64) | 61.54<br>(49.17-72.64) | 68.48<br>(65.71-71.28)                                                              | 67.66<br>(64.98-70.48) | 77.69<br>(74.88-80.45) |
| South Korea   | 100.00<br>(100.00-100.00)                                                   | 100.00<br>(100.00-100.00) | 100.00<br>(100.00-100.00) | 100.00<br>(100.00-100.00)                                                   | 100.00<br>(100.00-100.00) | 100.00<br>(100.00-100.00) | 67.96<br>(56.98-77.36)                                                      | 62.43<br>(50.44-72.83) | 54.06<br>(40.12-65.66) | 57.52<br>(54.54-60.93)                                                              | 63.99<br>(61.24-67.08) | 67.24<br>(64.23-70.47) |
| Andorra       | 100.00<br>(100.00-100.00)                                                   | 100.00<br>(100.00-100.00) | 100.00<br>(100.00-100.00) | 100.00<br>(100.00-100.00)                                                   | 100.00<br>(100.00-100.00) | 100.00<br>(100.00-100.00) | 61.15<br>(44.14-75.63)                                                      | 59.69<br>(43.58-73.53) | 56.51<br>(38.75-71.61) | 81.19<br>(75.66-89.99)                                                              | 86.29<br>(80.16-95.60) | 88.90<br>(83.23-95.39) |
| Austria       | 100.00<br>(100.00-100.00)                                                   | 100.00<br>(100.00-100.00) | 100.00<br>(100.00-100.00) | 100.00<br>(100.00-100.00)                                                   | 100.00<br>(100.00-100.00) | 100.00<br>(100.00-100.00) | 58.71<br>(41.19-74.20)                                                      | 52.68<br>(33.18-69.21) | 49.45<br>(28.94-66.30) | 67.52<br>(64.97-70.31)                                                              | 72.87<br>(70.36-75.37) | 79.82<br>(77.25-82.25) |
| Belgium       | 100.00<br>(100.00-100.00)                                                   | 100.00<br>(100.00-100.00) | 100.00<br>(100.00-100.00) | 100.00<br>(100.00-100.00)                                                   | 100.00<br>(100.00-100.00) | 100.00<br>(100.00-100.00) | 59.48<br>(42.40-73.70)                                                      | 54.19<br>(35.12-69.46) | 56.85<br>(38.76-71.44) | 65.31<br>(62.72-68.22)                                                              | 69.28<br>(66.76-71.95) | 73.41<br>(70.82-76.02) |

**Appendix Table 1a. Scaled values for each SDG health-related indicator and three summary indicators by country for 1990, 2000, and 2015**

| Location   | Indicator 2.2.1: Prevalence of stunting among children under 5 years of age |                           |                           | Indicator 2.2.2a: Prevalence of wasting among children under 5 years of age |                           |                           | Indicator 2.2.2b: Prevalence of overweight among children aged 2 to 4 years |                        |                        | Indicator 3.1.1: Maternal mortality ratio (maternal deaths per 100,000 live births) |                        |                          |
|------------|-----------------------------------------------------------------------------|---------------------------|---------------------------|-----------------------------------------------------------------------------|---------------------------|---------------------------|-----------------------------------------------------------------------------|------------------------|------------------------|-------------------------------------------------------------------------------------|------------------------|--------------------------|
|            | 1990                                                                        | 2000                      | 2015                      | 1990                                                                        | 2000                      | 2015                      | 1990                                                                        | 2000                   | 2015                   | 1990                                                                                | 2000                   | 2015                     |
| Cyprus     | 100.00<br>(100.00-100.00)                                                   | 100.00<br>(100.00-100.00) | 100.00<br>(100.00-100.00) | 100.00<br>(100.00-100.00)                                                   | 100.00<br>(100.00-100.00) | 100.00<br>(100.00-100.00) | 51.70<br>(33.79-67.21)                                                      | 50.95<br>(32.82-67.36) | 52.78<br>(35.32-68.17) | 65.76<br>(61.48-69.80)                                                              | 67.04<br>(63.06-70.98) | 76.61<br>(72.87-80.21)   |
| Denmark    | 100.00<br>(100.00-100.00)                                                   | 100.00<br>(100.00-100.00) | 100.00<br>(100.00-100.00) | 100.00<br>(100.00-100.00)                                                   | 100.00<br>(100.00-100.00) | 100.00<br>(100.00-100.00) | 56.42<br>(38.23-72.00)                                                      | 49.39<br>(29.57-66.75) | 50.50<br>(30.86-66.89) | 69.57<br>(66.96-72.49)                                                              | 75.83<br>(72.97-78.53) | 79.66<br>(77.70-81.77)   |
| Finland    | 100.00<br>(100.00-100.00)                                                   | 100.00<br>(100.00-100.00) | 100.00<br>(100.00-100.00) | 100.00<br>(100.00-100.00)                                                   | 100.00<br>(100.00-100.00) | 100.00<br>(100.00-100.00) | 59.36<br>(41.18-74.38)                                                      | 62.44<br>(46.26-75.92) | 58.09<br>(40.42-71.75) | 72.10<br>(69.47-74.88)                                                              | 72.97<br>(70.18-75.85) | 81.00<br>(78.11-83.77)   |
| France     | 100.00<br>(100.00-100.00)                                                   | 100.00<br>(100.00-100.00) | 100.00<br>(100.00-100.00) | 100.00<br>(100.00-100.00)                                                   | 100.00<br>(100.00-100.00) | 100.00<br>(100.00-100.00) | 64.21<br>(48.26-77.55)                                                      | 58.23<br>(40.47-72.22) | 58.84<br>(41.25-73.11) | 62.78<br>(59.92-65.83)                                                              | 67.24<br>(64.53-70.14) | 72.20<br>(69.14-75.44)   |
| Germany    | 100.00<br>(100.00-100.00)                                                   | 100.00<br>(100.00-100.00) | 100.00<br>(100.00-100.00) | 100.00<br>(100.00-100.00)                                                   | 100.00<br>(100.00-100.00) | 100.00<br>(100.00-100.00) | 66.76<br>(51.67-79.66)                                                      | 59.06<br>(42.47-73.70) | 47.18<br>(27.22-64.68) | 61.52<br>(58.97-64.63)                                                              | 68.10<br>(65.47-70.84) | 71.24<br>(68.62-74.05)   |
| Greece     | 100.00<br>(100.00-100.00)                                                   | 100.00<br>(100.00-100.00) | 100.00<br>(100.00-100.00) | 100.00<br>(100.00-100.00)                                                   | 100.00<br>(100.00-100.00) | 100.00<br>(100.00-100.00) | 47.35<br>(28.60-64.69)                                                      | 39.67<br>(19.38-57.29) | 36.68<br>(15.31-56.04) | 69.87<br>(67.08-72.61)                                                              | 71.77<br>(69.14-74.36) | 69.77<br>(66.88-72.80)   |
| Iceland    | 100.00<br>(100.00-100.00)                                                   | 100.00<br>(100.00-100.00) | 100.00<br>(100.00-100.00) | 100.00<br>(100.00-100.00)                                                   | 100.00<br>(100.00-100.00) | 100.00<br>(100.00-100.00) | 37.52<br>(17.66-56.19)                                                      | 42.84<br>(22.77-61.21) | 42.59<br>(22.60-61.58) | 83.86<br>(81.33-86.35)                                                              | 93.95<br>(91.39-96.41) | 99.94<br>(100.00-100.00) |
| Ireland    | 100.00<br>(100.00-100.00)                                                   | 100.00<br>(100.00-100.00) | 100.00<br>(100.00-100.00) | 100.00<br>(100.00-100.00)                                                   | 100.00<br>(100.00-100.00) | 100.00<br>(100.00-100.00) | 55.45<br>(35.81-71.30)                                                      | 55.13<br>(41.59-66.01) | 51.15<br>(31.28-67.75) | 73.39<br>(70.11-76.39)                                                              | 77.20<br>(74.17-80.11) | 78.12<br>(74.85-81.12)   |
| Israel     | 100.00<br>(100.00-100.00)                                                   | 100.00<br>(100.00-100.00) | 100.00<br>(100.00-100.00) | 100.00<br>(100.00-100.00)                                                   | 100.00<br>(100.00-100.00) | 100.00<br>(100.00-100.00) | 62.16<br>(44.82-76.35)                                                      | 55.58<br>(37.16-70.93) | 45.00<br>(23.32-63.66) | 67.82<br>(65.24-70.66)                                                              | 72.17<br>(69.59-74.83) | 75.57<br>(72.78-78.44)   |
| Italy      | 100.00<br>(100.00-100.00)                                                   | 100.00<br>(100.00-100.00) | 100.00<br>(100.00-100.00) | 100.00<br>(100.00-100.00)                                                   | 100.00<br>(100.00-100.00) | 100.00<br>(100.00-100.00) | 47.99<br>(28.80-65.59)                                                      | 38.62<br>(19.35-56.73) | 38.81<br>(19.64-57.72) | 68.97<br>(66.43-71.58)                                                              | 73.58<br>(70.98-76.30) | 79.47<br>(76.86-82.10)   |
| Luxembourg | 100.00<br>(100.00-100.00)                                                   | 100.00<br>(100.00-100.00) | 100.00<br>(100.00-100.00) | 100.00<br>(100.00-100.00)                                                   | 100.00<br>(100.00-100.00) | 100.00<br>(100.00-100.00) | 64.82<br>(48.29-78.74)                                                      | 53.22<br>(34.80-68.99) | 47.56<br>(28.01-64.07) | 69.06<br>(66.30-71.91)                                                              | 74.13<br>(71.30-76.78) | 68.26<br>(65.31-71.41)   |

**Appendix Table 1a. Scaled values for each SDG health-related indicator and three summary indicators by country for 1990, 2000, and 2015**

| Location       | Indicator 2.2.1: Prevalence of stunting among children under 5 years of age |                           |                           | Indicator 2.2.2a: Prevalence of wasting among children under 5 years of age |                           |                           | Indicator 2.2.2b: Prevalence of overweight among children aged 2 to 4 years |                        |                        | Indicator 3.1.1: Maternal mortality ratio (maternal deaths per 100,000 live births) |                        |                        |
|----------------|-----------------------------------------------------------------------------|---------------------------|---------------------------|-----------------------------------------------------------------------------|---------------------------|---------------------------|-----------------------------------------------------------------------------|------------------------|------------------------|-------------------------------------------------------------------------------------|------------------------|------------------------|
|                | 1990                                                                        | 2000                      | 2015                      | 1990                                                                        | 2000                      | 2015                      | 1990                                                                        | 2000                   | 2015                   | 1990                                                                                | 2000                   | 2015                   |
| Malta          | 100.00<br>(100.00-100.00)                                                   | 100.00<br>(100.00-100.00) | 100.00<br>(100.00-100.00) | 100.00<br>(100.00-100.00)                                                   | 100.00<br>(100.00-100.00) | 100.00<br>(100.00-100.00) | 41.28<br>(19.85-59.02)                                                      | 33.95<br>(13.01-53.88) | 36.10<br>(16.23-55.81) | 68.64<br>(65.79-71.68)                                                              | 68.26<br>(65.53-71.17) | 75.71<br>(72.93-78.32) |
| Netherlands    | 100.00<br>(100.00-100.00)                                                   | 100.00<br>(100.00-100.00) | 100.00<br>(100.00-100.00) | 100.00<br>(100.00-100.00)                                                   | 100.00<br>(100.00-100.00) | 100.00<br>(100.00-100.00) | 73.77<br>(60.45-83.83)                                                      | 65.80<br>(50.83-78.73) | 57.22<br>(38.68-72.06) | 66.94<br>(64.09-69.81)                                                              | 65.89<br>(63.03-68.79) | 74.27<br>(71.51-77.09) |
| Norway         | 100.00<br>(100.00-100.00)                                                   | 100.00<br>(100.00-100.00) | 100.00<br>(100.00-100.00) | 100.00<br>(100.00-100.00)                                                   | 100.00<br>(100.00-100.00) | 100.00<br>(100.00-100.00) | 63.78<br>(47.39-77.72)                                                      | 58.41<br>(42.17-72.81) | 48.63<br>(29.50-66.14) | 73.84<br>(71.04-76.67)                                                              | 75.31<br>(72.50-78.13) | 80.70<br>(78.10-82.84) |
| Portugal       | 100.00<br>(100.00-100.00)                                                   | 100.00<br>(100.00-100.00) | 100.00<br>(100.00-100.00) | 100.00<br>(100.00-100.00)                                                   | 100.00<br>(100.00-100.00) | 100.00<br>(100.00-100.00) | 63.07<br>(47.47-76.94)                                                      | 48.92<br>(29.80-66.10) | 39.90<br>(20.65-56.67) | 61.50<br>(58.68-64.73)                                                              | 65.77<br>(63.17-68.62) | 70.56<br>(67.80-73.33) |
| Spain          | 100.00<br>(100.00-100.00)                                                   | 100.00<br>(100.00-100.00) | 100.00<br>(100.00-100.00) | 100.00<br>(100.00-100.00)                                                   | 100.00<br>(100.00-100.00) | 100.00<br>(100.00-100.00) | 24.90<br>(3.78-44.93)                                                       | 22.48<br>(2.59-43.46)  | 33.03<br>(12.21-52.23) | 66.50<br>(63.81-69.21)                                                              | 72.61<br>(70.18-75.24) | 76.26<br>(73.68-78.82) |
| Sweden         | 100.00<br>(100.00-100.00)                                                   | 100.00<br>(100.00-100.00) | 100.00<br>(100.00-100.00) | 100.00<br>(100.00-100.00)                                                   | 100.00<br>(100.00-100.00) | 100.00<br>(100.00-100.00) | 60.90<br>(44.39-75.07)                                                      | 54.15<br>(36.07-70.43) | 51.46<br>(32.35-67.66) | 69.13<br>(66.61-71.87)                                                              | 74.76<br>(72.51-77.16) | 79.45<br>(77.29-81.73) |
| Switzerland    | 100.00<br>(100.00-100.00)                                                   | 100.00<br>(100.00-100.00) | 100.00<br>(100.00-100.00) | 100.00<br>(100.00-100.00)                                                   | 100.00<br>(100.00-100.00) | 100.00<br>(100.00-100.00) | 67.03<br>(51.50-80.79)                                                      | 66.83<br>(50.74-79.85) | 61.66<br>(44.02-75.59) | 73.32<br>(70.64-76.12)                                                              | 72.59<br>(69.81-75.44) | 75.92<br>(73.15-78.78) |
| United Kingdom | 100.00<br>(100.00-100.00)                                                   | 100.00<br>(100.00-100.00) | 100.00<br>(100.00-100.00) | 100.00<br>(100.00-100.00)                                                   | 100.00<br>(100.00-100.00) | 100.00<br>(100.00-100.00) | 67.14<br>(54.41-77.84)                                                      | 66.09<br>(59.70-72.08) | 64.48<br>(54.05-73.43) | 68.14<br>(65.84-70.67)                                                              | 65.69<br>(63.42-68.39) | 70.21<br>(67.85-72.70) |
| Argentina      | 73.12<br>(62.82-81.82)                                                      | 84.11<br>(78.87-88.67)    | 90.50<br>(85.49-94.39)    | 92.53<br>(86.68-96.42)                                                      | 94.13<br>(89.11-96.99)    | 95.79<br>(91.74-98.28)    | 43.93<br>(21.79-62.46)                                                      | 37.16<br>(11.41-58.21) | 28.96<br>(5.89-50.07)  | 45.90<br>(42.56-49.98)                                                              | 48.19<br>(44.93-52.09) | 49.21<br>(45.55-53.60) |
| Chile          | 87.92<br>(83.50-91.46)                                                      | 95.29<br>(93.99-96.32)    | 97.17<br>(95.46-98.27)    | 98.38<br>(96.85-99.29)                                                      | 98.20<br>(96.94-99.08)    | 98.01<br>(95.88-99.20)    | 51.18<br>(30.96-70.06)                                                      | 39.39<br>(16.64-60.72) | 27.09<br>(0.82-50.62)  | 48.66<br>(45.29-52.51)                                                              | 58.54<br>(55.41-61.86) | 60.30<br>(57.05-63.54) |
| Uruguay        | 78.11<br>(73.24-82.54)                                                      | 80.07<br>(74.76-84.91)    | 86.83<br>(80.26-92.02)    | 94.02<br>(89.67-96.73)                                                      | 92.75<br>(87.78-96.17)    | 93.88<br>(88.39-97.25)    | 58.11<br>(37.88-74.46)                                                      | 50.31<br>(28.95-68.11) | 38.62<br>(15.48-59.78) | 52.08<br>(48.79-55.80)                                                              | 55.67<br>(52.78-59.46) | 59.82<br>(56.76-63.21) |

**Appendix Table 1a. Scaled values for each SDG health-related indicator and three summary indicators by country for 1990, 2000, and 2015**

| Location               | Indicator 2.2.1: Prevalence of stunting among children under 5 years of age |                        |                        | Indicator 2.2.2a: Prevalence of wasting among children under 5 years of age |                        |                        | Indicator 2.2.2b: Prevalence of overweight among children aged 2 to 4 years |                        |                        | Indicator 3.1.1: Maternal mortality ratio (maternal deaths per 100,000 live births) |                        |                        |
|------------------------|-----------------------------------------------------------------------------|------------------------|------------------------|-----------------------------------------------------------------------------|------------------------|------------------------|-----------------------------------------------------------------------------|------------------------|------------------------|-------------------------------------------------------------------------------------|------------------------|------------------------|
|                        | 1990                                                                        | 2000                   | 2015                   | 1990                                                                        | 2000                   | 2015                   | 1990                                                                        | 2000                   | 2015                   | 1990                                                                                | 2000                   | 2015                   |
| Belarus                | 89.47<br>(84.53-93.13)                                                      | 91.22<br>(87.49-94.10) | 96.36<br>(94.45-97.70) | 88.90<br>(72.97-96.82)                                                      | 90.64<br>(78.72-96.88) | 93.28<br>(83.06-97.94) | 70.75<br>(60.33-79.14)                                                      | 71.68<br>(62.09-79.89) | 65.40<br>(54.18-75.15) | 52.74<br>(49.20-56.63)                                                              | 51.71<br>(48.33-55.52) | 71.78<br>(68.26-75.36) |
| Estonia                | 79.90<br>(71.57-87.10)                                                      | 84.67<br>(78.12-89.64) | 92.19<br>(88.15-95.08) | 83.99<br>(61.34-95.49)                                                      | 88.00<br>(71.28-96.28) | 91.42<br>(78.67-97.71) | 70.48<br>(60.10-79.23)                                                      | 68.81<br>(58.60-77.68) | 50.19<br>(36.05-62.91) | 51.92<br>(48.49-55.77)                                                              | 58.61<br>(55.71-61.99) | 78.11<br>(75.37-81.02) |
| Latvia                 | 83.59<br>(76.87-89.40)                                                      | 83.82<br>(76.73-89.29) | 92.33<br>(88.66-95.15) | 86.35<br>(66.89-95.91)                                                      | 86.92<br>(67.25-96.21) | 91.68<br>(80.37-97.42) | 64.16<br>(53.51-74.44)                                                      | 71.38<br>(61.87-79.50) | 54.56<br>(41.73-67.09) | 49.77<br>(46.43-53.54)                                                              | 57.18<br>(54.08-60.70) | 66.17<br>(63.34-69.41) |
| Lithuania              | 81.94<br>(74.46-88.07)                                                      | 85.09<br>(78.34-90.20) | 92.27<br>(88.64-95.04) | 84.33<br>(62.90-95.44)                                                      | 87.57<br>(68.87-96.64) | 91.27<br>(77.40-97.66) | 72.90<br>(63.83-80.82)                                                      | 73.46<br>(64.63-81.51) | 58.69<br>(46.86-69.22) | 54.76<br>(51.38-58.42)                                                              | 63.65<br>(60.76-66.61) | 69.06<br>(66.90-71.69) |
| Moldova                | 81.02<br>(72.82-86.97)                                                      | 79.66<br>(72.56-85.65) | 91.93<br>(88.90-94.08) | 76.68<br>(43.99-93.30)                                                      | 78.86<br>(54.39-92.22) | 91.38<br>(81.27-96.66) | 75.60<br>(66.91-82.79)                                                      | 77.96<br>(71.02-83.89) | 66.95<br>(56.89-75.92) | 49.65<br>(46.22-53.51)                                                              | 55.35<br>(52.18-58.93) | 64.56<br>(61.34-68.02) |
| Russia                 | 71.41<br>(63.95-77.64)                                                      | 74.98<br>(67.25-82.05) | 85.46<br>(78.17-90.55) | 86.15<br>(72.03-94.29)                                                      | 86.08<br>(68.15-95.07) | 89.62<br>(73.49-96.70) | 50.57<br>(41.18-59.77)                                                      | 59.25<br>(48.93-68.57) | 46.22<br>(31.92-57.97) | 47.60<br>(44.01-51.63)                                                              | 49.27<br>(45.89-53.23) | 61.38<br>(58.59-64.40) |
| Ukraine                | 68.72<br>(57.82-78.21)                                                      | 70.39<br>(65.03-75.29) | 83.79<br>(77.46-89.44) | 86.80<br>(67.44-96.08)                                                      | 89.41<br>(79.91-95.25) | 93.96<br>(83.99-98.41) | 74.37<br>(64.88-81.96)                                                      | 78.40<br>(70.22-85.11) | 68.40<br>(58.06-76.94) | 49.22<br>(45.79-52.99)                                                              | 48.28<br>(44.94-52.24) | 58.28<br>(55.02-62.00) |
| Albania                | 26.84<br>(12.92-40.30)                                                      | 32.58<br>(24.55-40.31) | 68.64<br>(59.53-76.90) | 62.79<br>(46.12-76.71)                                                      | 61.00<br>(49.70-72.25) | 76.85<br>(65.21-84.93) | 47.69<br>(29.65-62.71)                                                      | 37.58<br>(21.01-53.18) | 30.54<br>(11.95-47.32) | 56.20<br>(52.64-60.26)                                                              | 63.84<br>(60.51-67.19) | 70.18<br>(65.64-74.83) |
| Bosnia and Herzegovina | 66.13<br>(55.37-75.27)                                                      | 81.15<br>(77.24-84.61) | 89.38<br>(85.74-92.26) | 72.61<br>(59.04-82.80)                                                      | 77.97<br>(71.01-84.22) | 89.28<br>(84.76-93.08) | 69.92<br>(57.45-80.22)                                                      | 59.02<br>(46.28-70.65) | 47.75<br>(31.13-61.02) | 53.63<br>(49.85-57.80)                                                              | 57.44<br>(53.23-61.89) | 66.53<br>(62.44-70.50) |
| Bulgaria               | 85.48<br>(79.88-89.78)                                                      | 85.59<br>(80.52-89.71) | 91.11<br>(87.38-93.94) | 83.07<br>(73.84-89.66)                                                      | 82.03<br>(73.59-88.48) | 85.42<br>(78.42-91.00) | 17.29<br>(0.00-36.05)                                                       | 39.12<br>(20.82-54.07) | 38.88<br>(19.57-55.13) | 51.14<br>(48.09-54.92)                                                              | 49.54<br>(46.31-53.44) | 61.20<br>(58.04-64.53) |
| Croatia                | 80.22<br>(72.84-86.20)                                                      | 83.27<br>(76.95-88.45) | 90.61<br>(86.42-93.62) | 81.95<br>(72.85-88.84)                                                      | 82.33<br>(73.35-89.22) | 87.69<br>(81.79-92.57) | 67.02<br>(54.81-77.30)                                                      | 63.88<br>(50.00-75.55) | 46.06<br>(29.53-60.88) | 63.87<br>(61.10-66.88)                                                              | 65.57<br>(62.72-68.41) | 70.64<br>(68.04-73.41) |

**Appendix Table 1a. Scaled values for each SDG health-related indicator and three summary indicators by country for 1990, 2000, and 2015**

| Location       | Indicator 2.2.1: Prevalence of stunting among children under 5 years of age |                        |                        | Indicator 2.2.2a: Prevalence of wasting among children under 5 years of age |                        |                        | Indicator 2.2.2b: Prevalence of overweight among children aged 2 to 4 years |                        |                        | Indicator 3.1.1: Maternal mortality ratio (maternal deaths per 100,000 live births) |                        |                        |
|----------------|-----------------------------------------------------------------------------|------------------------|------------------------|-----------------------------------------------------------------------------|------------------------|------------------------|-----------------------------------------------------------------------------|------------------------|------------------------|-------------------------------------------------------------------------------------|------------------------|------------------------|
|                | 1990                                                                        | 2000                   | 2015                   | 1990                                                                        | 2000                   | 2015                   | 1990                                                                        | 2000                   | 2015                   | 1990                                                                                | 2000                   | 2015                   |
| Czech Republic | 95.31<br>(94.28-96.23)                                                      | 96.10<br>(95.24-96.82) | 97.30<br>(96.08-98.20) | 90.12<br>(86.92-93.15)                                                      | 85.99<br>(81.78-89.85) | 88.34<br>(82.49-92.88) | 60.09<br>(45.41-73.01)                                                      | 58.67<br>(43.64-71.81) | 54.48<br>(39.50-67.68) | 62.77<br>(60.00-65.79)                                                              | 69.79<br>(67.10-72.49) | 75.19<br>(72.49-77.93) |
| Hungary        | 95.56<br>(93.99-96.91)                                                      | 95.81<br>(93.98-97.25) | 97.17<br>(95.97-98.10) | 86.51<br>(79.91-91.63)                                                      | 86.32<br>(78.78-91.71) | 88.21<br>(82.55-92.82) | 36.87<br>(19.25-53.09)                                                      | 50.55<br>(33.39-64.13) | 47.30<br>(30.45-61.56) | 61.37<br>(58.21-64.46)                                                              | 67.79<br>(65.23-70.68) | 69.35<br>(66.36-72.34) |
| Macedonia      | 84.92<br>(79.19-89.28)                                                      | 86.78<br>(83.67-89.23) | 93.59<br>(91.57-95.25) | 89.27<br>(83.55-93.06)                                                      | 90.79<br>(87.24-93.84) | 92.99<br>(89.94-95.53) | 63.81<br>(49.24-75.95)                                                      | 61.38<br>(46.83-73.79) | 56.54<br>(40.87-69.08) | 63.03<br>(59.76-66.38)                                                              | 64.89<br>(61.91-67.86) | 71.52<br>(68.12-74.72) |
| Montenegro     | 79.82<br>(71.78-86.05)                                                      | 83.78<br>(78.41-88.26) | 87.52<br>(83.60-90.85) | 81.55<br>(72.54-88.45)                                                      | 83.91<br>(76.35-90.32) | 89.99<br>(85.87-93.39) | 55.88<br>(40.71-69.00)                                                      | 57.22<br>(42.88-70.40) | 44.48<br>(30.97-56.25) | 67.73<br>(63.52-71.94)                                                              | 65.18<br>(61.00-69.39) | 76.56<br>(72.12-80.92) |
| Poland         | 88.04<br>(83.41-91.90)                                                      | 90.41<br>(86.52-93.59) | 94.32<br>(91.98-96.21) | 87.21<br>(80.16-91.96)                                                      | 86.97<br>(80.15-92.01) | 90.40<br>(85.37-94.27) | 53.58<br>(37.30-66.65)                                                      | 53.79<br>(38.36-67.83) | 49.99<br>(33.37-64.78) | 54.62<br>(51.66-58.09)                                                              | 66.36<br>(63.75-69.19) | 79.70<br>(77.10-82.43) |
| Romania        | 82.81<br>(79.21-86.02)                                                      | 79.96<br>(77.51-82.27) | 87.83<br>(82.93-91.64) | 88.75<br>(85.00-92.00)                                                      | 87.50<br>(84.48-90.70) | 89.37<br>(83.93-93.60) | 65.23<br>(52.31-77.05)                                                      | 60.88<br>(46.81-73.40) | 51.59<br>(35.94-66.42) | 39.50<br>(35.70-44.08)                                                              | 52.22<br>(49.07-55.88) | 61.41<br>(57.94-64.83) |
| Serbia         | 82.42<br>(76.05-87.65)                                                      | 84.73<br>(80.07-88.50) | 91.36<br>(89.10-93.29) | 81.97<br>(73.03-89.30)                                                      | 82.84<br>(74.66-88.79) | 87.46<br>(82.88-91.37) | 55.94<br>(40.51-69.17)                                                      | 60.22<br>(46.39-73.26) | 64.89<br>(56.12-72.52) | 60.56<br>(54.89-65.41)                                                              | 66.66<br>(63.65-69.70) | 68.23<br>(65.05-71.30) |
| Slovakia       | 85.68<br>(79.69-90.08)                                                      | 87.71<br>(82.43-91.64) | 93.30<br>(90.41-95.48) | 85.37<br>(78.11-91.02)                                                      | 84.96<br>(77.79-90.91) | 89.27<br>(83.42-93.56) | 60.49<br>(46.07-72.92)                                                      | 62.24<br>(47.51-73.26) | 61.71<br>(48.02-73.34) | 63.53<br>(60.22-66.88)                                                              | 66.51<br>(63.60-69.66) | 74.67<br>(71.55-77.68) |
| Slovenia       | 87.12<br>(81.42-91.21)                                                      | 90.12<br>(86.16-93.33) | 93.74<br>(91.09-95.61) | 85.13<br>(77.92-90.97)                                                      | 85.83<br>(78.86-91.33) | 89.58<br>(84.45-93.70) | 55.69<br>(41.12-68.39)                                                      | 50.34<br>(35.77-63.91) | 39.11<br>(23.28-53.66) | 68.69<br>(65.75-71.56)                                                              | 68.69<br>(66.06-71.62) | 76.37<br>(73.47-79.16) |
| Armenia        | 72.03<br>(63.37-79.20)                                                      | 73.30<br>(68.19-77.81) | 80.13<br>(74.15-84.63) | 86.25<br>(74.60-93.86)                                                      | 86.96<br>(79.66-92.31) | 87.21<br>(76.89-94.12) | 63.06<br>(49.68-74.22)                                                      | 61.22<br>(51.82-69.44) | 45.04<br>(29.89-58.22) | 49.23<br>(45.45-53.38)                                                              | 50.23<br>(46.63-54.10) | 58.26<br>(54.40-62.18) |
| Azerbaijan     | 63.87<br>(54.16-71.84)                                                      | 65.01<br>(59.62-70.07) | 79.15<br>(72.55-84.54) | 81.47<br>(65.88-91.66)                                                      | 80.76<br>(70.73-88.53) | 83.74<br>(68.99-92.68) | 80.50<br>(72.63-87.23)                                                      | 78.36<br>(70.45-84.62) | 44.41<br>(29.24-59.13) | 52.23<br>(48.89-56.26)                                                              | 49.74<br>(46.08-53.46) | 60.72<br>(56.60-65.05) |

**Appendix Table 1a. Scaled values for each SDG health-related indicator and three summary indicators by country for 1990, 2000, and 2015**

| Location     | Indicator 2.2.1: Prevalence of stunting among children under 5 years of age |                        |                        | Indicator 2.2.2a: Prevalence of wasting among children under 5 years of age |                        |                        | Indicator 2.2.2b: Prevalence of overweight among children aged 2 to 4 years |                        |                        | Indicator 3.1.1: Maternal mortality ratio (maternal deaths per 100,000 live births) |                        |                        |
|--------------|-----------------------------------------------------------------------------|------------------------|------------------------|-----------------------------------------------------------------------------|------------------------|------------------------|-----------------------------------------------------------------------------|------------------------|------------------------|-------------------------------------------------------------------------------------|------------------------|------------------------|
|              | 1990                                                                        | 2000                   | 2015                   | 1990                                                                        | 2000                   | 2015                   | 1990                                                                        | 2000                   | 2015                   | 1990                                                                                | 2000                   | 2015                   |
| Georgia      | 74.37<br>(66.55-80.83)                                                      | 75.38<br>(69.96-79.86) | 84.34<br>(79.61-88.61) | 86.19<br>(73.52-93.65)                                                      | 89.07<br>(81.84-94.06) | 91.78<br>(84.89-96.33) | 66.09<br>(53.72-76.61)                                                      | 60.81<br>(48.25-71.85) | 46.12<br>(29.71-60.77) | 51.55<br>(48.03-55.57)                                                              | 55.25<br>(51.86-59.06) | 51.38<br>(47.58-55.44) |
| Kazakhstan   | 72.38<br>(64.88-78.92)                                                      | 74.30<br>(68.69-79.28) | 85.39<br>(81.09-88.97) | 82.04<br>(68.50-91.21)                                                      | 85.33<br>(75.76-91.91) | 86.73<br>(76.77-93.45) | 71.68<br>(61.67-80.41)                                                      | 75.40<br>(67.67-82.00) | 52.25<br>(38.07-64.95) | 46.13<br>(42.69-50.09)                                                              | 46.55<br>(43.10-50.57) | 57.15<br>(53.73-60.81) |
| Kyrgyzstan   | 56.32<br>(46.23-65.21)                                                      | 60.25<br>(52.62-67.59) | 78.36<br>(73.62-82.36) | 86.67<br>(75.62-94.01)                                                      | 87.20<br>(77.95-93.39) | 89.16<br>(81.87-93.96) | 63.71<br>(51.03-74.14)                                                      | 69.20<br>(58.78-77.58) | 71.09<br>(62.59-77.93) | 45.56<br>(41.97-49.65)                                                              | 46.01<br>(42.38-50.02) | 49.72<br>(45.88-54.06) |
| Mongolia     | 53.29<br>(45.47-60.95)                                                      | 57.28<br>(52.10-62.17) | 79.76<br>(74.30-84.62) | 89.31<br>(80.96-94.63)                                                      | 87.56<br>(79.71-92.68) | 93.45<br>(87.55-96.93) | 58.33<br>(43.07-71.05)                                                      | 65.75<br>(53.54-75.90) | 55.91<br>(41.52-68.88) | 33.34<br>(28.62-38.71)                                                              | 33.01<br>(28.35-38.13) | 47.31<br>(42.68-52.12) |
| Tajikistan   | 49.93<br>(38.60-60.45)                                                      | 42.01<br>(37.21-47.09) | 61.54<br>(53.89-68.29) | 61.41<br>(30.79-80.89)                                                      | 61.25<br>(43.91-74.95) | 70.68<br>(50.18-84.66) | 79.05<br>(70.22-86.28)                                                      | 82.80<br>(75.16-89.49) | 80.00<br>(73.27-86.21) | 44.65<br>(40.73-48.89)                                                              | 47.59<br>(44.09-51.84) | 57.58<br>(53.24-61.70) |
| Turkmenistan | 58.75<br>(48.43-67.96)                                                      | 61.39<br>(54.08-67.87) | 80.48<br>(74.60-85.77) | 77.11<br>(58.23-89.62)                                                      | 77.11<br>(61.62-87.06) | 82.66<br>(66.94-92.37) | 67.68<br>(55.90-77.38)                                                      | 64.38<br>(52.38-75.25) | 46.64<br>(32.11-60.23) | 46.51<br>(42.78-50.76)                                                              | 45.03<br>(41.05-49.33) | 60.98<br>(57.35-64.68) |
| Uzbekistan   | 48.17<br>(37.54-59.15)                                                      | 56.69<br>(48.96-63.74) | 78.11<br>(71.36-83.84) | 70.88<br>(47.34-85.58)                                                      | 71.59<br>(52.88-83.84) | 83.73<br>(68.16-92.63) | 48.34<br>(33.64-60.85)                                                      | 56.13<br>(44.66-66.62) | 54.80<br>(39.85-67.50) | 48.71<br>(45.09-52.78)                                                              | 49.74<br>(46.28-53.79) | 57.24<br>(53.06-61.43) |
| Colombia     | 67.45<br>(63.92-70.59)                                                      | 73.63<br>(70.71-76.08) | 82.98<br>(79.78-85.75) | 92.14<br>(88.77-94.93)                                                      | 94.90<br>(92.66-96.68) | 95.77<br>(93.20-97.61) | 84.83<br>(78.76-89.69)                                                      | 83.82<br>(79.69-87.38) | 89.19<br>(82.59-94.14) | 40.03<br>(35.91-44.93)                                                              | 42.74<br>(39.11-47.19) | 48.31<br>(44.54-52.43) |
| Costa Rica   | 85.78<br>(82.79-88.39)                                                      | 89.09<br>(86.88-91.13) | 93.27<br>(91.82-94.51) | 94.70<br>(91.67-96.96)                                                      | 95.42<br>(92.64-97.34) | 96.33<br>(94.04-97.91) | 60.94<br>(43.85-76.28)                                                      | 52.41<br>(31.26-69.78) | 41.74<br>(19.82-61.59) | 55.75<br>(52.57-59.23)                                                              | 53.67<br>(50.59-57.31) | 58.17<br>(54.65-61.85) |
| El Salvador  | 50.35<br>(45.23-55.22)                                                      | 65.21<br>(60.20-69.87) | 74.78<br>(70.72-78.76) | 93.51<br>(91.01-95.64)                                                      | 95.12<br>(93.32-96.75) | 95.09<br>(92.35-97.19) | 85.41<br>(78.68-90.82)                                                      | 83.66<br>(78.05-87.90) | 79.13<br>(67.70-87.80) | 35.99<br>(31.73-40.89)                                                              | 48.73<br>(44.96-52.96) | 52.56<br>(48.46-57.25) |
| Guatemala    | 13.85<br>(6.33-20.47)                                                       | 25.23<br>(19.72-31.50) | 37.59<br>(29.48-45.67) | 90.40<br>(85.90-93.99)                                                      | 87.81<br>(83.19-91.85) | 93.09<br>(89.02-96.10) | 81.37<br>(74.93-86.58)                                                      | 73.84<br>(68.83-78.42) | 75.46<br>(63.49-84.81) | 35.40<br>(31.19-40.40)                                                              | 39.49<br>(35.62-43.84) | 44.45<br>(39.46-49.87) |

**Appendix Table 1a. Scaled values for each SDG health-related indicator and three summary indicators by country for 1990, 2000, and 2015**

| Location            | Indicator 2.2.1: Prevalence of stunting among children under 5 years of age |                        |                        | Indicator 2.2.2a: Prevalence of wasting among children under 5 years of age |                        |                        | Indicator 2.2.2b: Prevalence of overweight among children aged 2 to 4 years |                        |                        | Indicator 3.1.1: Maternal mortality ratio (maternal deaths per 100,000 live births) |                        |                        |
|---------------------|-----------------------------------------------------------------------------|------------------------|------------------------|-----------------------------------------------------------------------------|------------------------|------------------------|-----------------------------------------------------------------------------|------------------------|------------------------|-------------------------------------------------------------------------------------|------------------------|------------------------|
|                     | 1990                                                                        | 2000                   | 2015                   | 1990                                                                        | 2000                   | 2015                   | 1990                                                                        | 2000                   | 2015                   | 1990                                                                                | 2000                   | 2015                   |
| Honduras            | 36.95<br>(32.12-42.05)                                                      | 49.15<br>(43.81-54.61) | 68.98<br>(64.17-73.18) | 92.65<br>(90.61-94.72)                                                      | 94.79<br>(92.97-96.39) | 95.49<br>(93.27-97.14) | 90.94<br>(84.24-95.89)                                                      | 87.19<br>(82.26-91.23) | 80.14<br>(70.68-86.99) | 33.29<br>(28.59-38.73)                                                              | 38.10<br>(32.57-44.20) | 39.46<br>(32.98-46.11) |
| Mexico              | 61.20<br>(58.58-63.71)                                                      | 72.74<br>(70.81-74.49) | 80.87<br>(79.52-82.15) | 82.23<br>(78.09-86.68)                                                      | 92.79<br>(91.12-94.55) | 93.72<br>(92.28-95.26) | 52.65<br>(33.07-68.38)                                                      | 53.37<br>(32.75-69.44) | 66.47<br>(52.87-78.36) | 44.32<br>(41.03-48.42)                                                              | 46.64<br>(43.47-50.60) | 49.63<br>(46.91-53.42) |
| Nicaragua           | 56.83<br>(51.05-62.26)                                                      | 63.02<br>(58.82-67.03) | 76.47<br>(72.02-80.38) | 89.69<br>(84.28-93.69)                                                      | 92.67<br>(89.91-95.12) | 96.08<br>(93.73-97.90) | 77.21<br>(66.23-86.55)                                                      | 76.68<br>(70.61-82.01) | 73.13<br>(58.33-83.55) | 42.25<br>(38.12-46.70)                                                              | 40.34<br>(36.41-44.77) | 45.24<br>(40.87-50.04) |
| Panama              | 80.99<br>(78.35-83.45)                                                      | 85.93<br>(83.24-88.41) | 92.23<br>(90.48-93.71) | 91.88<br>(88.41-94.56)                                                      | 95.33<br>(93.30-97.00) | 96.11<br>(93.81-97.77) | 82.18<br>(71.78-90.11)                                                      | 81.29<br>(70.32-89.96) | 76.07<br>(62.73-86.81) | 45.24<br>(41.09-49.70)                                                              | 46.03<br>(42.40-50.27) | 45.12<br>(40.81-50.10) |
| Venezuela           | 72.93<br>(70.36-75.34)                                                      | 73.83<br>(71.55-75.91) | 84.99<br>(82.17-87.46) | 86.87<br>(83.76-90.24)                                                      | 86.78<br>(83.28-90.52) | 89.26<br>(83.01-93.84) | 62.95<br>(44.09-77.61)                                                      | 66.52<br>(48.89-81.25) | 59.06<br>(40.20-74.82) | 45.39<br>(41.92-49.47)                                                              | 47.21<br>(43.87-51.32) | 46.20<br>(41.88-50.91) |
| Bolivia             | 40.57<br>(35.12-45.77)                                                      | 52.61<br>(47.96-57.16) | 67.94<br>(62.64-73.01) | 92.88<br>(89.39-95.58)                                                      | 93.60<br>(90.81-95.96) | 94.99<br>(91.78-97.14) | 64.36<br>(57.85-70.37)                                                      | 60.91<br>(54.42-66.78) | 58.91<br>(50.08-66.53) | 22.56<br>(16.80-28.46)                                                              | 30.80<br>(25.84-36.43) | 35.68<br>(29.46-41.89) |
| Ecuador             | 45.64<br>(39.52-51.30)                                                      | 55.68<br>(50.91-60.38) | 71.86<br>(67.03-76.35) | 91.55<br>(87.16-94.60)                                                      | 90.63<br>(86.70-94.06) | 93.47<br>(89.60-96.40) | 77.07<br>(70.70-82.22)                                                      | 75.61<br>(69.69-80.53) | 70.62<br>(64.33-76.40) | 37.56<br>(33.65-42.46)                                                              | 44.27<br>(40.49-48.59) | 48.84<br>(44.43-53.00) |
| Peru                | 46.55<br>(40.69-52.00)                                                      | 54.56<br>(49.81-59.07) | 74.08<br>(70.55-77.50) | 93.08<br>(90.13-95.51)                                                      | 95.52<br>(93.73-97.01) | 97.95<br>(96.94-98.68) | 62.60<br>(55.38-68.93)                                                      | 60.81<br>(54.13-66.86) | 69.06<br>(63.48-74.70) | 32.75<br>(28.07-38.25)                                                              | 39.11<br>(35.06-43.95) | 49.94<br>(45.36-54.97) |
| Antigua and Barbuda | 89.13<br>(85.82-91.87)                                                      | 91.95<br>(89.43-94.05) | 94.70<br>(92.89-96.10) | 89.41<br>(83.50-93.96)                                                      | 90.10<br>(84.26-94.36) | 92.30<br>(87.85-95.63) | 80.75<br>(72.75-86.95)                                                      | 75.73<br>(66.84-83.32) | 77.48<br>(68.62-84.47) | 48.46<br>(44.58-52.61)                                                              | 49.34<br>(45.31-53.68) | 53.24<br>(49.41-57.33) |
| The Bahamas         | 89.44<br>(86.18-92.11)                                                      | 92.26<br>(89.74-94.44) | 93.79<br>(91.71-95.56) | 89.60<br>(83.55-94.01)                                                      | 90.44<br>(84.52-94.50) | 91.43<br>(86.17-95.06) | 63.66<br>(51.87-74.10)                                                      | 58.83<br>(46.98-69.78) | 60.32<br>(47.40-70.95) | 44.41<br>(40.19-48.87)                                                              | 44.26<br>(39.78-48.98) | 49.42<br>(45.00-54.19) |
| Barbados            | 87.52<br>(83.57-90.44)                                                      | 85.53<br>(81.27-89.07) | 90.46<br>(87.71-92.77) | 88.46<br>(81.67-93.54)                                                      | 78.93<br>(67.03-87.98) | 81.78<br>(72.79-88.78) | 65.25<br>(54.54-74.55)                                                      | 64.28<br>(54.15-73.71) | 57.48<br>(45.09-67.77) | 43.02<br>(39.05-47.41)                                                              | 53.97<br>(50.26-57.97) | 52.59<br>(48.20-56.52) |

**Appendix Table 1a. Scaled values for each SDG health-related indicator and three summary indicators by country for 1990, 2000, and 2015**

| Location                         | Indicator 2.2.1: Prevalence of stunting among children under 5 years of age |                        |                        | Indicator 2.2.2a: Prevalence of wasting among children under 5 years of age |                        |                        | Indicator 2.2.2b: Prevalence of overweight among children aged 2 to 4 years |                        |                        | Indicator 3.1.1: Maternal mortality ratio (maternal deaths per 100,000 live births) |                        |                        |
|----------------------------------|-----------------------------------------------------------------------------|------------------------|------------------------|-----------------------------------------------------------------------------|------------------------|------------------------|-----------------------------------------------------------------------------|------------------------|------------------------|-------------------------------------------------------------------------------------|------------------------|------------------------|
|                                  | 1990                                                                        | 2000                   | 2015                   | 1990                                                                        | 2000                   | 2015                   | 1990                                                                        | 2000                   | 2015                   | 1990                                                                                | 2000                   | 2015                   |
| Belize                           | 48.44<br>(36.99-58.35)                                                      | 61.04<br>(52.34-69.14) | 74.94<br>(69.37-80.01) | 87.26<br>(79.19-92.89)                                                      | 89.00<br>(82.59-93.40) | 89.63<br>(84.83-93.57) | 75.16<br>(66.86-82.39)                                                      | 70.45<br>(60.76-79.34) | 74.37<br>(65.20-81.98) | 50.05<br>(46.52-54.41)                                                              | 46.59<br>(42.65-50.85) | 54.81<br>(50.29-59.09) |
| Cuba                             | 87.31<br>(83.67-90.41)                                                      | 89.08<br>(86.80-91.16) | 89.39<br>(86.69-91.69) | 89.99<br>(84.54-94.11)                                                      | 90.97<br>(87.22-94.01) | 92.35<br>(88.93-95.19) | 61.75<br>(49.57-72.11)                                                      | 64.15<br>(53.22-74.21) | 48.99<br>(35.18-61.74) | 48.80<br>(45.41-52.78)                                                              | 48.78<br>(45.34-52.78) | 51.55<br>(48.03-55.49) |
| Dominica                         | 82.86<br>(77.68-87.20)                                                      | 88.46<br>(85.12-91.43) | 92.49<br>(89.87-94.44) | 88.44<br>(81.90-93.50)                                                      | 89.86<br>(83.46-94.25) | 91.85<br>(86.48-95.21) | 77.90<br>(69.80-84.56)                                                      | 70.99<br>(60.44-79.63) | 69.01<br>(57.90-78.21) | 59.19<br>(55.73-62.76)                                                              | 61.06<br>(57.61-64.73) | 52.67<br>(48.51-57.27) |
| Dominican Republic               | 71.34<br>(66.94-75.73)                                                      | 83.69<br>(81.07-86.12) | 90.14<br>(87.88-92.06) | 91.56<br>(88.63-94.22)                                                      | 92.83<br>(90.58-94.95) | 92.67<br>(89.38-95.29) | 86.61<br>(82.81-89.71)                                                      | 79.63<br>(74.83-83.62) | 76.78<br>(70.37-82.31) | 41.68<br>(37.71-46.25)                                                              | 46.93<br>(43.43-51.00) | 48.44<br>(44.14-53.03) |
| Grenada                          | 81.67<br>(76.55-86.28)                                                      | 87.42<br>(83.45-90.61) | 92.15<br>(89.75-94.15) | 87.61<br>(79.76-93.24)                                                      | 88.86<br>(82.23-93.84) | 91.43<br>(86.25-95.19) | 80.86<br>(73.50-87.16)                                                      | 74.28<br>(65.23-81.96) | 71.36<br>(61.63-80.04) | 48.84<br>(45.06-53.08)                                                              | 55.57<br>(52.01-59.25) | 54.20<br>(50.57-58.29) |
| Guyana                           | 69.77<br>(62.75-76.33)                                                      | 76.96<br>(72.92-80.57) | 75.63<br>(69.75-80.77) | 60.56<br>(41.89-75.58)                                                      | 60.81<br>(47.62-73.16) | 77.10<br>(64.52-86.30) | 87.56<br>(82.08-92.09)                                                      | 83.79<br>(77.40-88.95) | 82.25<br>(76.12-87.84) | 36.68<br>(32.30-41.95)                                                              | 34.20<br>(29.57-39.51) | 39.40<br>(34.12-44.79) |
| Haiti                            | 44.38<br>(37.53-51.01)                                                      | 55.90<br>(49.60-61.76) | 68.93<br>(62.82-74.26) | 75.66<br>(65.68-83.31)                                                      | 75.49<br>(66.09-82.77) | 80.37<br>(71.07-87.27) | 89.97<br>(85.86-93.54)                                                      | 92.10<br>(89.23-94.50) | 89.12<br>(84.96-92.94) | 17.10<br>(10.69-23.94)                                                              | 17.18<br>(10.89-24.07) | 19.03<br>(11.13-26.97) |
| Jamaica                          | 80.60<br>(77.12-83.41)                                                      | 87.80<br>(86.19-89.31) | 91.58<br>(88.74-93.60) | 85.88<br>(80.85-90.33)                                                      | 88.94<br>(85.48-92.20) | 88.67<br>(82.05-93.21) | 68.46<br>(58.23-77.61)                                                      | 60.83<br>(48.93-71.27) | 58.66<br>(45.76-69.55) | 51.81<br>(47.50-56.43)                                                              | 45.69<br>(41.30-50.30) | 49.22<br>(44.47-54.67) |
| Saint Lucia                      | 93.58<br>(91.65-95.25)                                                      | 95.60<br>(94.13-96.72) | 97.02<br>(96.04-97.79) | 84.62<br>(75.72-91.19)                                                      | 86.62<br>(79.00-92.42) | 88.44<br>(82.25-93.17) | 92.08<br>(87.96-95.49)                                                      | 90.49<br>(85.99-94.35) | 91.58<br>(87.76-94.88) | 48.05<br>(44.10-52.15)                                                              | 42.57<br>(38.58-46.97) | 47.04<br>(42.77-51.48) |
| Saint Vincent and the Grenadines | 81.20<br>(75.25-85.70)                                                      | 87.39<br>(83.77-90.58) | 92.40<br>(90.08-94.37) | 87.45<br>(79.99-92.87)                                                      | 89.04<br>(82.13-93.77) | 91.83<br>(86.86-95.38) | 66.18<br>(54.29-75.60)                                                      | 55.97<br>(42.33-67.21) | 50.54<br>(37.38-63.24) | 47.99<br>(43.65-52.35)                                                              | 53.99<br>(50.48-57.94) | 51.87<br>(47.73-56.09) |
| Suriname                         | 74.85<br>(67.92-80.62)                                                      | 79.50<br>(75.13-83.27) | 89.82<br>(86.98-92.24) | 77.72<br>(64.95-86.93)                                                      | 79.00<br>(69.61-86.08) | 85.21<br>(77.06-91.18) | 90.02<br>(85.37-93.90)                                                      | 88.41<br>(83.18-92.78) | 81.95<br>(74.91-87.62) | 46.67<br>(42.66-51.38)                                                              | 42.46<br>(38.06-47.23) | 49.12<br>(44.54-54.07) |

**Appendix Table 1a. Scaled values for each SDG health-related indicator and three summary indicators by country for 1990, 2000, and 2015**

| Location            | Indicator 2.2.1: Prevalence of stunting among children under 5 years of age |                           |                           | Indicator 2.2.2a: Prevalence of wasting among children under 5 years of age |                           |                           | Indicator 2.2.2b: Prevalence of overweight among children aged 2 to 4 years |                        |                        | Indicator 3.1.1: Maternal mortality ratio (maternal deaths per 100,000 live births) |                        |                        |
|---------------------|-----------------------------------------------------------------------------|---------------------------|---------------------------|-----------------------------------------------------------------------------|---------------------------|---------------------------|-----------------------------------------------------------------------------|------------------------|------------------------|-------------------------------------------------------------------------------------|------------------------|------------------------|
|                     | 1990                                                                        | 2000                      | 2015                      | 1990                                                                        | 2000                      | 2015                      | 1990                                                                        | 2000                   | 2015                   | 1990                                                                                | 2000                   | 2015                   |
| Trinidad and Tobago | 90.58<br>(88.23-92.60)                                                      | 91.23<br>(89.08-93.09)    | 95.03<br>(93.31-96.41)    | 82.11<br>(74.05-88.79)                                                      | 83.65<br>(76.81-89.35)    | 87.46<br>(80.21-92.65)    | 90.95<br>(86.95-94.30)                                                      | 86.35<br>(80.31-91.25) | 80.58<br>(73.07-86.43) | 43.96<br>(40.55-48.31)                                                              | 46.68<br>(43.09-50.97) | 49.40<br>(45.14-53.85) |
| Brazil              | 71.02<br>(68.78-73.36)                                                      | 81.79<br>(80.06-83.37)    | 90.30<br>(89.39-91.18)    | 91.15<br>(88.03-93.80)                                                      | 84.71<br>(79.95-89.19)    | 91.66<br>(88.45-94.15)    | 79.96<br>(72.10-86.46)                                                      | 70.04<br>(61.14-77.69) | 49.63<br>(28.47-67.65) | 42.58<br>(39.29-47.06)                                                              | 44.79<br>(41.47-48.84) | 45.86<br>(42.47-50.10) |
| Paraguay            | 72.52<br>(68.16-76.24)                                                      | 74.15<br>(68.40-79.12)    | 82.02<br>(76.58-86.65)    | 97.12<br>(95.32-98.45)                                                      | 95.96<br>(92.09-98.17)    | 95.53<br>(89.83-98.44)    | 79.18<br>(74.16-83.42)                                                      | 73.65<br>(60.30-84.99) | 69.75<br>(53.34-82.13) | 35.38<br>(30.98-40.52)                                                              | 39.10<br>(34.82-44.00) | 40.39<br>(34.97-45.83) |
| China               | 49.87<br>(43.99-55.31)                                                      | 67.46<br>(62.56-71.71)    | 86.69<br>(84.01-89.00)    | 86.51<br>(81.79-90.40)                                                      | 91.45<br>(88.41-94.08)    | 91.18<br>(87.51-94.02)    | 72.41<br>(65.43-78.70)                                                      | 72.03<br>(64.28-78.97) | 61.67<br>(47.18-73.11) | 38.70<br>(34.67-43.37)                                                              | 42.46<br>(38.96-46.80) | 62.18<br>(59.13-65.45) |
| North Korea         | 30.17<br>(1.26-58.83)                                                       | 29.70<br>(17.43-43.18)    | 52.99<br>(26.26-75.26)    | 79.91<br>(49.21-95.32)                                                      | 64.21<br>(48.18-77.26)    | 82.84<br>(57.87-94.88)    | 95.12<br>(90.93-98.52)                                                      | 95.13<br>(91.04-98.46) | 96.81<br>(93.40-99.49) | 40.76<br>(32.67-48.70)                                                              | 41.51<br>(33.40-48.72) | 44.87<br>(38.07-52.11) |
| Taiwan              | 100.00<br>(100.00-100.00)                                                   | 100.00<br>(100.00-100.00) | 100.00<br>(100.00-100.00) | 100.00<br>(100.00-100.00)                                                   | 100.00<br>(100.00-100.00) | 100.00<br>(100.00-100.00) | 52.54<br>(35.32-67.66)                                                      | 46.90<br>(29.59-62.68) | 52.42<br>(35.31-66.34) | 60.25<br>(54.86-65.65)                                                              | 64.26<br>(59.35-68.89) | 67.59<br>(61.90-72.74) |
| Cambodia            | 11.13<br>(2.93-20.17)                                                       | 20.66<br>(13.44-28.47)    | 47.57<br>(40.51-54.68)    | 50.30<br>(28.40-68.21)                                                      | 50.61<br>(34.70-64.74)    | 67.04<br>(54.69-78.22)    | 97.12<br>(93.36-99.93)                                                      | 95.13<br>(92.64-97.24) | 95.68<br>(91.49-98.75) | 22.56<br>(17.27-28.66)                                                              | 20.87<br>(15.35-27.20) | 37.12<br>(30.39-43.13) |
| Indonesia           | 22.71<br>(15.49-29.82)                                                      | 40.90<br>(36.22-45.34)    | 61.54<br>(55.61-67.44)    | 64.58<br>(49.06-78.05)                                                      | 70.66<br>(59.90-79.98)    | 71.59<br>(56.62-82.49)    | 90.14<br>(82.54-95.27)                                                      | 87.24<br>(81.61-91.57) | 86.53<br>(78.54-92.46) | 22.16<br>(17.03-28.20)                                                              | 24.10<br>(18.86-29.88) | 33.07<br>(26.76-39.86) |
| Laos                | 19.52<br>(12.25-26.60)                                                      | 29.01<br>(22.46-35.63)    | 47.37<br>(40.61-53.64)    | 57.12<br>(39.04-71.87)                                                      | 54.49<br>(36.61-68.88)    | 76.49<br>(64.93-85.25)    | 95.55<br>(91.20-98.69)                                                      | 94.29<br>(89.23-98.07) | 92.70<br>(86.29-97.11) | 15.64<br>(8.96-22.47)                                                               | 16.97<br>(10.62-23.47) | 29.38<br>(22.77-36.22) |
| Malaysia            | 57.74<br>(51.20-64.14)                                                      | 70.73<br>(67.01-74.30)    | 81.73<br>(78.27-84.84)    | 53.92<br>(32.66-71.39)                                                      | 58.73<br>(41.46-72.81)    | 67.51<br>(50.68-80.00)    | 68.08<br>(53.10-81.46)                                                      | 58.66<br>(39.06-73.97) | 53.13<br>(34.39-69.90) | 42.03<br>(37.98-46.38)                                                              | 44.84<br>(41.10-48.91) | 46.65<br>(41.75-51.94) |
| Maldives            | 44.81<br>(38.30-51.37)                                                      | 55.94<br>(50.73-61.08)    | 73.96<br>(69.49-78.06)    | 55.21<br>(36.84-70.33)                                                      | 48.68<br>(30.98-66.01)    | 64.94<br>(47.48-77.88)    | 93.28<br>(87.58-97.61)                                                      | 91.44<br>(85.02-96.07) | 81.35<br>(71.33-88.85) | 32.57<br>(26.18-38.55)                                                              | 41.41<br>(36.62-46.28) | 51.88<br>(46.48-57.32) |

**Appendix Table 1a. Scaled values for each SDG health-related indicator and three summary indicators by country for 1990, 2000, and 2015**

| Location                       | Indicator 2.2.1: Prevalence of stunting among children under 5 years of age |                        |                        | Indicator 2.2.2a: Prevalence of wasting among children under 5 years of age |                        |                        | Indicator 2.2.2b: Prevalence of overweight among children aged 2 to 4 years |                        |                        | Indicator 3.1.1: Maternal mortality ratio (maternal deaths per 100,000 live births) |                        |                        |
|--------------------------------|-----------------------------------------------------------------------------|------------------------|------------------------|-----------------------------------------------------------------------------|------------------------|------------------------|-----------------------------------------------------------------------------|------------------------|------------------------|-------------------------------------------------------------------------------------|------------------------|------------------------|
|                                | 1990                                                                        | 2000                   | 2015                   | 1990                                                                        | 2000                   | 2015                   | 1990                                                                        | 2000                   | 2015                   | 1990                                                                                | 2000                   | 2015                   |
| Mauritius                      | 71.02<br>(66.79-75.03)                                                      | 82.65<br>(79.59-85.33) | 89.59<br>(87.39-91.58) | 52.08<br>(31.70-68.36)                                                      | 59.53<br>(41.24-74.45) | 68.23<br>(52.24-81.00) | 68.24<br>(52.95-80.82)                                                      | 62.47<br>(44.29-77.11) | 56.94<br>(37.25-72.61) | 45.43<br>(41.85-49.87)                                                              | 51.37<br>(47.90-55.23) | 49.46<br>(45.95-53.44) |
| Myanmar                        | 16.02<br>(9.27-22.81)                                                       | 32.96<br>(26.41-39.37) | 62.50<br>(56.49-68.24) | 60.60<br>(47.14-72.79)                                                      | 66.16<br>(55.42-75.99) | 76.32<br>(65.06-85.32) | 96.33<br>(92.17-99.44)                                                      | 94.71<br>(89.79-98.39) | 79.76<br>(69.42-88.65) | 11.36<br>(2.44-21.30)                                                               | 12.93<br>(4.08-22.41)  | 23.04<br>(13.36-32.11) |
| Philippines                    | 38.87<br>(35.13-43.01)                                                      | 47.01<br>(43.09-50.83) | 61.22<br>(55.25-66.58) | 75.62<br>(69.63-81.98)                                                      | 76.40<br>(70.05-82.66) | 79.50<br>(69.25-87.24) | 98.03<br>(94.38-100.00)                                                     | 97.51<br>(93.84-99.85) | 93.28<br>(86.73-97.73) | 40.80<br>(36.79-45.48)                                                              | 44.91<br>(41.38-49.07) | 45.00<br>(40.71-49.77) |
| Sri Lanka                      | 56.51<br>(51.76-61.17)                                                      | 72.60<br>(69.09-75.89) | 80.58<br>(77.22-83.69) | 49.80<br>(35.70-63.49)                                                      | 50.16<br>(35.54-64.09) | 63.36<br>(46.81-76.92) | 86.30<br>(76.69-93.31)                                                      | 85.11<br>(75.51-92.56) | 80.66<br>(68.63-89.23) | 44.07<br>(40.17-48.55)                                                              | 46.17<br>(42.70-50.17) | 54.72<br>(48.74-60.61) |
| Seychelles                     | 89.31<br>(87.19-91.14)                                                      | 92.60<br>(91.09-94.01) | 95.48<br>(94.47-96.35) | 89.23<br>(84.22-93.50)                                                      | 89.95<br>(84.54-94.20) | 91.74<br>(87.16-95.20) | 84.05<br>(74.12-91.71)                                                      | 82.52<br>(72.44-90.67) | 80.46<br>(68.80-89.36) | 46.81<br>(42.09-51.85)                                                              | 52.39<br>(48.18-56.83) | 54.77<br>(50.20-59.22) |
| Thailand                       | 66.17<br>(62.35-69.98)                                                      | 76.40<br>(72.90-79.68) | 85.10<br>(81.87-87.68) | 76.26<br>(66.92-84.72)                                                      | 79.81<br>(70.49-87.19) | 83.71<br>(75.12-90.10) | 89.77<br>(82.27-95.22)                                                      | 82.41<br>(71.65-90.83) | 71.41<br>(55.43-83.79) | 51.85<br>(48.16-55.57)                                                              | 55.61<br>(51.49-59.98) | 60.83<br>(55.03-67.31) |
| Timor-Leste                    | 4.86<br>(0.00-13.41)                                                        | 16.61<br>(10.13-23.88) | 33.53<br>(25.44-41.19) | 50.81<br>(26.87-69.35)                                                      | 50.46<br>(31.78-67.22) | 51.02<br>(29.17-68.21) | 92.29<br>(85.93-97.08)                                                      | 93.26<br>(87.72-97.25) | 87.97<br>(79.90-93.82) | 16.01<br>(8.94-23.35)                                                               | 22.26<br>(15.46-29.98) | 29.57<br>(22.70-38.12) |
| Vietnam                        | 13.14<br>(7.35-18.89)                                                       | 39.34<br>(35.41-43.34) | 68.82<br>(63.89-73.39) | 68.14<br>(59.19-77.01)                                                      | 66.45<br>(59.26-74.95) | 80.33<br>(71.47-87.31) | 98.25<br>(95.14-100.00)                                                     | 96.32<br>(93.18-98.70) | 85.85<br>(76.35-92.93) | 50.19<br>(44.37-55.89)                                                              | 54.82<br>(49.54-59.96) | 63.86<br>(57.21-70.09) |
| Federated States of Micronesia | 80.35<br>(76.96-83.56)                                                      | 83.11<br>(80.19-85.97) | 87.56<br>(85.21-89.71) | 84.74<br>(75.56-91.20)                                                      | 87.49<br>(79.92-92.81) | 88.44<br>(81.10-93.44) | 64.61<br>(45.02-80.48)                                                      | 65.66<br>(46.12-80.59) | 66.59<br>(47.28-82.08) | 37.32<br>(27.94-46.39)                                                              | 38.98<br>(29.38-49.37) | 42.69<br>(32.54-51.61) |
| Fiji                           | 83.65<br>(80.57-86.32)                                                      | 86.32<br>(83.64-88.65) | 89.96<br>(88.12-91.65) | 85.42<br>(77.56-91.51)                                                      | 88.39<br>(81.30-93.23) | 88.92<br>(82.57-93.51) | 63.60<br>(44.91-79.50)                                                      | 50.93<br>(27.98-69.95) | 51.48<br>(29.70-71.85) | 41.04<br>(35.30-47.30)                                                              | 38.67<br>(33.69-43.95) | 40.77<br>(35.25-46.99) |
| Kiribati                       | 51.80<br>(45.59-57.74)                                                      | 58.02<br>(51.88-63.90) | 68.36<br>(63.35-72.97) | 65.84<br>(49.07-78.40)                                                      | 71.34<br>(55.73-82.99) | 75.70<br>(61.98-86.14) | 18.53<br>(0.00-42.80)                                                       | 16.96<br>(0.00-38.83)  | 13.76<br>(0.00-37.45)  | 28.49<br>(22.56-35.12)                                                              | 33.47<br>(28.11-39.44) | 37.13<br>(30.96-43.42) |

**Appendix Table 1a. Scaled values for each SDG health-related indicator and three summary indicators by country for 1990, 2000, and 2015**

| Location         | Indicator 2.2.1: Prevalence of stunting among children under 5 years of age |                        |                        | Indicator 2.2.2a: Prevalence of wasting among children under 5 years of age |                        |                        | Indicator 2.2.2b: Prevalence of overweight among children aged 2 to 4 years |                        |                        | Indicator 3.1.1: Maternal mortality ratio (maternal deaths per 100,000 live births) |                        |                        |
|------------------|-----------------------------------------------------------------------------|------------------------|------------------------|-----------------------------------------------------------------------------|------------------------|------------------------|-----------------------------------------------------------------------------|------------------------|------------------------|-------------------------------------------------------------------------------------|------------------------|------------------------|
|                  | 1990                                                                        | 2000                   | 2015                   | 1990                                                                        | 2000                   | 2015                   | 1990                                                                        | 2000                   | 2015                   | 1990                                                                                | 2000                   | 2015                   |
| Marshall Islands | 74.81<br>(70.49-78.73)                                                      | 77.70<br>(73.77-80.79) | 84.24<br>(81.24-86.80) | 82.84<br>(72.80-90.08)                                                      | 86.04<br>(78.33-91.94) | 86.94<br>(79.28-92.66) | 50.70<br>(27.84-70.35)                                                      | 46.76<br>(22.48-66.59) | 42.76<br>(18.23-63.99) | 39.04<br>(33.22-44.83)                                                              | 37.68<br>(30.73-46.55) | 39.55<br>(32.85-46.17) |
| Papua New Guinea | 30.45<br>(22.48-37.73)                                                      | 37.65<br>(30.81-44.21) | 50.76<br>(43.76-56.82) | 81.55<br>(70.39-89.53)                                                      | 84.08<br>(75.98-90.23) | 85.66<br>(77.56-91.55) | 61.57<br>(40.99-77.83)                                                      | 62.07<br>(42.67-78.75) | 70.85<br>(53.03-83.81) | 18.50<br>(9.01-27.03)                                                               | 19.06<br>(10.07-28.08) | 21.52<br>(11.60-30.21) |
| Samoa            | 88.23<br>(85.97-90.05)                                                      | 90.72<br>(89.25-92.03) | 93.78<br>(92.58-94.81) | 93.42<br>(89.55-96.14)                                                      | 94.58<br>(91.82-96.59) | 94.86<br>(91.81-97.02) | 27.72<br>(1.55-52.87)                                                       | 27.09<br>(3.24-50.49)  | 22.22<br>(0.00-46.22)  | 46.24<br>(39.19-53.39)                                                              | 47.21<br>(40.07-56.03) | 48.32<br>(41.22-55.11) |
| Solomon Islands  | 50.77<br>(45.33-56.20)                                                      | 53.40<br>(47.20-59.34) | 63.33<br>(57.34-68.19) | 76.70<br>(66.69-84.57)                                                      | 83.80<br>(76.02-90.19) | 86.11<br>(79.00-91.77) | 59.74<br>(39.85-78.11)                                                      | 54.60<br>(30.92-73.08) | 42.80<br>(18.40-63.32) | 28.23<br>(18.77-37.83)                                                              | 29.97<br>(20.97-39.95) | 31.52<br>(21.68-40.96) |
| Tonga            | 96.96<br>(96.42-97.51)                                                      | 97.61<br>(97.15-98.02) | 98.35<br>(98.01-98.67) | 94.29<br>(91.33-96.60)                                                      | 94.78<br>(91.79-96.96) | 95.39<br>(92.53-97.34) | 35.25<br>(11.20-57.14)                                                      | 28.85<br>(4.18-51.40)  | 16.20<br>(0.00-41.35)  | 31.65<br>(25.10-37.81)                                                              | 32.23<br>(27.18-37.81) | 37.21<br>(30.32-44.13) |
| Vanuatu          | 62.46<br>(57.49-67.12)                                                      | 62.21<br>(57.49-66.73) | 69.50<br>(64.91-74.01) | 77.46<br>(65.16-86.46)                                                      | 80.15<br>(70.99-87.40) | 82.82<br>(73.26-89.83) | 78.81<br>(65.37-90.11)                                                      | 77.83<br>(64.10-88.90) | 77.40<br>(62.09-89.17) | 31.78<br>(23.11-41.08)                                                              | 32.01<br>(22.74-42.63) | 33.93<br>(25.03-42.13) |
| Afghanistan      | 29.54<br>(13.91-44.04)                                                      | 19.85<br>(8.92-29.98)  | 33.07<br>(16.99-49.56) | 40.52<br>(9.26-64.32)                                                       | 47.47<br>(32.54-62.27) | 65.72<br>(43.52-81.36) | 81.79<br>(72.79-88.97)                                                      | 91.58<br>(85.34-96.16) | 87.70<br>(80.58-93.59) | 14.34<br>(5.62-23.00)                                                               | 13.91<br>(5.64-22.60)  | 13.30<br>(4.42-22.96)  |
| Algeria          | 70.67<br>(62.40-77.28)                                                      | 67.85<br>(61.29-73.67) | 77.74<br>(67.85-85.50) | 77.62<br>(70.05-85.02)                                                      | 75.03<br>(68.19-82.00) | 89.62<br>(82.15-94.25) | 81.53<br>(72.26-88.43)                                                      | 76.07<br>(65.51-84.61) | 57.27<br>(42.72-69.76) | 35.02<br>(29.90-40.58)                                                              | 37.70<br>(32.63-43.17) | 45.64<br>(40.69-50.60) |
| Bahrain          | 79.26<br>(73.85-84.00)                                                      | 83.11<br>(76.41-88.34) | 89.02<br>(83.67-92.85) | 77.96<br>(71.78-84.15)                                                      | 80.37<br>(69.41-88.57) | 84.12<br>(73.68-91.64) | 28.26<br>(9.42-45.72)                                                       | 26.03<br>(9.20-42.66)  | 21.59<br>(2.87-39.30)  | 48.40<br>(43.22-53.03)                                                              | 53.51<br>(48.70-57.89) | 58.16<br>(52.87-63.07) |
| Egypt            | 49.71<br>(41.93-56.78)                                                      | 62.91<br>(57.31-68.56) | 68.46<br>(60.53-75.35) | 85.95<br>(79.98-91.23)                                                      | 81.74<br>(74.63-87.84) | 73.35<br>(60.10-84.02) | 60.15<br>(52.62-68.25)                                                      | 52.91<br>(43.18-61.42) | 47.94<br>(33.79-61.68) | 35.76<br>(31.34-40.67)                                                              | 45.32<br>(41.40-49.86) | 51.45<br>(47.10-56.02) |
| Iran             | 60.13<br>(48.30-70.62)                                                      | 79.49<br>(73.95-84.14) | 90.19<br>(85.09-93.69) | 71.07<br>(55.36-82.87)                                                      | 82.63<br>(76.62-87.62) | 85.85<br>(76.10-92.50) | 86.47<br>(79.62-91.79)                                                      | 80.57<br>(72.03-87.23) | 76.82<br>(67.31-84.69) | 47.94<br>(42.38-53.66)                                                              | 54.20<br>(50.07-58.50) | 60.50<br>(54.83-65.55) |

**Appendix Table 1a. Scaled values for each SDG health-related indicator and three summary indicators by country for 1990, 2000, and 2015**

| Location     | Indicator 2.2.1: Prevalence of stunting among children under 5 years of age |                        |                        | Indicator 2.2.2a: Prevalence of wasting among children under 5 years of age |                        |                        | Indicator 2.2.2b: Prevalence of overweight among children aged 2 to 4 years |                        |                        | Indicator 3.1.1: Maternal mortality ratio (maternal deaths per 100,000 live births) |                        |                        |
|--------------|-----------------------------------------------------------------------------|------------------------|------------------------|-----------------------------------------------------------------------------|------------------------|------------------------|-----------------------------------------------------------------------------|------------------------|------------------------|-------------------------------------------------------------------------------------|------------------------|------------------------|
|              | 1990                                                                        | 2000                   | 2015                   | 1990                                                                        | 2000                   | 2015                   | 1990                                                                        | 2000                   | 2015                   | 1990                                                                                | 2000                   | 2015                   |
| Iraq         | 60.14<br>(51.13-68.23)                                                      | 55.55<br>(47.46-63.45) | 72.73<br>(63.39-79.70) | 85.41<br>(80.58-89.97)                                                      | 76.59<br>(70.09-83.15) | 79.61<br>(69.60-87.38) | 57.12<br>(42.26-69.49)                                                      | 81.34<br>(72.77-87.83) | 68.96<br>(57.36-78.72) | 35.61<br>(29.88-41.67)                                                              | 38.90<br>(33.09-45.24) | 47.62<br>(40.46-54.65) |
| Jordan       | 73.41<br>(65.65-80.17)                                                      | 81.05<br>(75.17-85.71) | 87.77<br>(82.69-91.54) | 86.40<br>(77.74-92.33)                                                      | 89.31<br>(83.42-93.77) | 90.18<br>(84.13-94.56) | 79.28<br>(72.97-84.66)                                                      | 87.84<br>(83.53-91.51) | 81.68<br>(75.16-87.34) | 40.69<br>(35.94-45.88)                                                              | 43.12<br>(38.37-48.21) | 58.36<br>(53.89-62.80) |
| Kuwait       | 86.28<br>(81.05-90.35)                                                      | 93.78<br>(92.30-95.07) | 94.94<br>(92.53-96.72) | 88.96<br>(81.71-94.10)                                                      | 93.08<br>(89.43-95.84) | 93.24<br>(88.39-96.40) | 42.81<br>(26.87-57.23)                                                      | 30.44<br>(12.63-46.84) | 22.71<br>(4.19-38.20)  | 69.48<br>(66.14-72.56)                                                              | 66.96<br>(64.10-69.79) | 75.46<br>(71.63-79.32) |
| Lebanon      | 71.04<br>(60.15-79.29)                                                      | 76.38<br>(69.92-82.11) | 84.49<br>(77.94-89.95) | 85.12<br>(75.80-91.63)                                                      | 83.23<br>(75.63-89.02) | 83.67<br>(72.88-91.32) | 57.06<br>(42.56-69.82)                                                      | 49.17<br>(35.70-60.98) | 55.21<br>(40.54-67.47) | 53.77<br>(47.65-59.67)                                                              | 57.24<br>(51.91-62.72) | 64.16<br>(57.59-70.50) |
| Libya        | 60.64<br>(50.08-70.98)                                                      | 64.00<br>(53.16-72.50) | 71.35<br>(60.23-79.90) | 84.33<br>(76.03-90.71)                                                      | 88.68<br>(84.05-92.97) | 83.85<br>(73.62-91.11) | 36.69<br>(18.15-51.57)                                                      | 41.93<br>(25.68-56.29) | 40.13<br>(23.46-54.91) | 57.16<br>(52.29-62.19)                                                              | 58.47<br>(53.73-63.24) | 59.08<br>(53.61-64.52) |
| Morocco      | 53.42<br>(44.59-61.83)                                                      | 61.92<br>(53.28-69.76) | 72.97<br>(62.36-81.81) | 87.92<br>(84.27-91.24)                                                      | 71.84<br>(62.32-80.23) | 74.81<br>(58.69-86.26) | 70.41<br>(64.36-75.90)                                                      | 69.02<br>(61.36-75.96) | 62.71<br>(48.61-74.25) | 24.85<br>(18.39-31.39)                                                              | 31.98<br>(26.27-37.94) | 45.53<br>(38.38-52.22) |
| Palestine    | 76.16<br>(66.31-83.91)                                                      | 81.77<br>(75.32-87.27) | 86.84<br>(83.09-90.17) | 87.42<br>(78.27-93.37)                                                      | 88.88<br>(83.28-93.22) | 94.67<br>(92.78-96.45) | 77.34<br>(67.17-85.15)                                                      | 73.37<br>(64.52-81.11) | 78.88<br>(71.14-85.14) | 56.18<br>(50.05-62.44)                                                              | 64.88<br>(61.08-68.49) | 63.38<br>(57.90-67.96) |
| Oman         | 63.94<br>(55.38-71.38)                                                      | 78.73<br>(73.09-83.35) | 86.36<br>(80.82-90.96) | 64.86<br>(53.50-75.29)                                                      | 76.25<br>(68.88-82.55) | 77.54<br>(64.73-87.29) | 64.26<br>(51.75-75.26)                                                      | 61.78<br>(48.26-73.43) | 55.48<br>(40.23-67.62) | 54.36<br>(47.56-60.84)                                                              | 59.92<br>(54.53-64.71) | 63.80<br>(58.78-68.48) |
| Qatar        | 84.73<br>(77.64-90.25)                                                      | 88.09<br>(82.27-92.47) | 93.36<br>(90.21-95.92) | 83.80<br>(71.44-91.50)                                                      | 85.91<br>(75.63-92.47) | 88.83<br>(81.01-94.17) | 36.82<br>(19.11-52.92)                                                      | 41.15<br>(22.32-56.99) | 31.92<br>(14.68-49.42) | 46.22<br>(40.37-51.89)                                                              | 47.04<br>(41.46-52.42) | 57.71<br>(52.60-62.83) |
| Saudi Arabia | 65.44<br>(60.56-70.10)                                                      | 77.70<br>(74.15-81.11) | 87.71<br>(85.44-89.57) | 90.12<br>(86.87-92.99)                                                      | 63.70<br>(52.14-74.65) | 74.92<br>(66.97-82.23) | 53.57<br>(38.21-66.53)                                                      | 45.78<br>(29.95-59.69) | 35.67<br>(18.32-50.74) | 60.14<br>(55.89-64.11)                                                              | 62.15<br>(59.07-65.25) | 63.71<br>(60.46-66.94) |
| Sudan        | 37.88<br>(25.66-48.58)                                                      | 33.78<br>(23.34-44.67) | 49.77<br>(39.61-59.13) | 51.18<br>(34.83-65.86)                                                      | 34.99<br>(22.11-50.45) | 44.45<br>(31.76-58.45) | 87.37<br>(80.87-92.59)                                                      | 85.95<br>(78.69-91.59) | 80.86<br>(71.49-87.87) | 19.88<br>(13.09-27.38)                                                              | 22.27<br>(14.80-30.90) | 26.81<br>(19.63-35.01) |

**Appendix Table 1a. Scaled values for each SDG health-related indicator and three summary indicators by country for 1990, 2000, and 2015**

| Location             | Indicator 2.2.1: Prevalence of stunting among children under 5 years of age |                        |                        | Indicator 2.2.2a: Prevalence of wasting among children under 5 years of age |                        |                        | Indicator 2.2.2b: Prevalence of overweight among children aged 2 to 4 years |                        |                        | Indicator 3.1.1: Maternal mortality ratio (maternal deaths per 100,000 live births) |                        |                        |
|----------------------|-----------------------------------------------------------------------------|------------------------|------------------------|-----------------------------------------------------------------------------|------------------------|------------------------|-----------------------------------------------------------------------------|------------------------|------------------------|-------------------------------------------------------------------------------------|------------------------|------------------------|
|                      | 1990                                                                        | 2000                   | 2015                   | 1990                                                                        | 2000                   | 2015                   | 1990                                                                        | 2000                   | 2015                   | 1990                                                                                | 2000                   | 2015                   |
| Syria                | 51.05<br>(40.09-61.08)                                                      | 59.57<br>(53.74-64.86) | 66.68<br>(56.74-75.99) | 66.76<br>(51.78-78.44)                                                      | 72.64<br>(64.94-80.46) | 68.24<br>(49.52-81.53) | 61.11<br>(46.86-73.01)                                                      | 60.26<br>(46.31-71.65) | 57.07<br>(42.02-69.49) | 37.67<br>(32.65-42.95)                                                              | 44.52<br>(39.36-49.54) | 48.43<br>(43.61-52.97) |
| Tunisia              | 74.25<br>(67.08-80.34)                                                      | 80.97<br>(76.58-84.96) | 88.91<br>(84.71-92.32) | 80.91<br>(72.19-87.99)                                                      | 88.54<br>(83.85-92.63) | 90.29<br>(84.72-94.38) | 80.80<br>(74.74-85.93)                                                      | 74.59<br>(64.58-82.76) | 65.36<br>(51.92-76.04) | 42.60<br>(37.64-47.34)                                                              | 47.21<br>(42.67-52.07) | 52.14<br>(46.61-58.03) |
| Turkey               | 64.24<br>(53.86-72.62)                                                      | 74.63<br>(68.67-79.66) | 86.35<br>(80.70-90.67) | 86.29<br>(79.98-91.37)                                                      | 92.62<br>(90.11-94.95) | 95.73<br>(92.88-97.69) | 81.75<br>(75.06-87.46)                                                      | 77.73<br>(71.53-83.21) | 65.34<br>(53.58-75.34) | 40.14<br>(34.73-45.66)                                                              | 49.76<br>(45.12-54.18) | 63.57<br>(59.93-67.42) |
| United Arab Emirates | 64.24<br>(52.79-74.33)                                                      | 73.31<br>(64.22-80.97) | 77.34<br>(68.26-85.08) | 46.47<br>(20.39-66.24)                                                      | 54.00<br>(31.36-71.85) | 64.59<br>(40.49-80.86) | 68.81<br>(57.43-78.21)                                                      | 74.30<br>(66.67-81.51) | 68.42<br>(56.75-79.49) | 55.09<br>(49.10-61.03)                                                              | 58.40<br>(53.88-63.18) | 62.12<br>(55.26-68.93) |
| Yemen                | 25.09<br>(14.94-34.78)                                                      | 17.47<br>(8.56-25.44)  | 32.20<br>(22.01-42.48) | 48.69<br>(31.45-64.26)                                                      | 51.94<br>(37.63-65.40) | 46.02<br>(27.73-63.00) | 79.90<br>(73.38-85.79)                                                      | 81.71<br>(73.29-88.52) | 77.18<br>(66.31-85.16) | 22.63<br>(14.91-32.45)                                                              | 22.75<br>(13.87-31.86) | 26.39<br>(15.59-35.58) |
| Bangladesh           | 11.80<br>(4.96-18.76)                                                       | 22.61<br>(17.24-27.99) | 48.01<br>(42.74-53.25) | 40.60<br>(23.82-57.64)                                                      | 51.40<br>(38.35-64.59) | 56.36<br>(42.55-69.29) | 95.73<br>(92.39-98.23)                                                      | 97.90<br>(96.03-99.39) | 96.87<br>(94.39-99.00) | 17.02<br>(11.22-23.82)                                                              | 20.29<br>(14.39-26.78) | 28.70<br>(22.35-35.16) |
| Bhutan               | 24.47<br>(14.05-34.74)                                                      | 36.01<br>(29.89-42.07) | 57.24<br>(49.77-64.42) | 83.98<br>(76.60-89.90)                                                      | 85.87<br>(80.59-90.46) | 80.00<br>(71.77-86.80) | 91.90<br>(87.20-95.83)                                                      | 88.72<br>(82.74-93.65) | 80.91<br>(71.69-87.71) | 19.51<br>(12.22-27.63)                                                              | 24.17<br>(17.37-31.59) | 29.76<br>(22.00-38.02) |
| India                | 8.62<br>(3.29-14.05)                                                        | 20.49<br>(15.68-25.56) | 45.64<br>(41.75-49.42) | 37.70<br>(25.89-52.57)                                                      | 45.06<br>(34.62-58.41) | 50.93<br>(40.94-62.74) | 90.39<br>(86.52-93.58)                                                      | 92.06<br>(88.93-94.69) | 85.99<br>(81.19-90.30) | 19.47<br>(14.15-25.31)                                                              | 21.41<br>(16.02-27.38) | 28.40<br>(23.25-34.00) |
| Nepal                | 1.46<br>(0.00-9.12)                                                         | 16.03<br>(8.52-23.46)  | 45.37<br>(38.17-52.25) | 68.81<br>(56.78-79.04)                                                      | 66.28<br>(56.11-76.52) | 64.35<br>(52.01-75.16) | 97.47<br>(94.77-99.60)                                                      | 97.75<br>(95.63-99.46) | 95.65<br>(93.19-97.81) | 18.38<br>(11.50-26.07)                                                              | 24.05<br>(18.23-31.13) | 25.18<br>(18.03-33.04) |
| Pakistan             | 25.21<br>(19.41-31.19)                                                      | 39.76<br>(33.91-45.45) | 37.51<br>(30.10-45.38) | 42.94<br>(27.75-57.85)                                                      | 53.31<br>(38.19-67.37) | 61.33<br>(47.61-73.80) | 81.61<br>(76.15-86.29)                                                      | 83.11<br>(74.82-89.24) | 84.63<br>(78.97-89.18) | 22.46<br>(16.60-29.10)                                                              | 19.17<br>(13.47-25.73) | 24.01<br>(17.79-30.81) |
| Botswana             | 42.05<br>(32.82-51.07)                                                      | 54.37<br>(48.15-60.24) | 66.39<br>(59.40-73.01) | 65.01<br>(40.18-81.75)                                                      | 74.42<br>(62.38-83.60) | 80.21<br>(62.75-90.33) | 84.00<br>(72.62-91.96)                                                      | 78.87<br>(64.78-88.74) | 72.08<br>(55.28-83.55) | 37.80<br>(19.99-52.95)                                                              | 28.86<br>(2.30-45.59)  | 35.93<br>(9.30-50.34)  |

**Appendix Table 1a. Scaled values for each SDG health-related indicator and three summary indicators by country for 1990, 2000, and 2015**

| Location      | Indicator 2.2.1: Prevalence of stunting among children under 5 years of age |                        |                        | Indicator 2.2.2a: Prevalence of wasting among children under 5 years of age |                        |                        | Indicator 2.2.2b: Prevalence of overweight among children aged 2 to 4 years |                        |                        | Indicator 3.1.1: Maternal mortality ratio (maternal deaths per 100,000 live births) |                        |                        |
|---------------|-----------------------------------------------------------------------------|------------------------|------------------------|-----------------------------------------------------------------------------|------------------------|------------------------|-----------------------------------------------------------------------------|------------------------|------------------------|-------------------------------------------------------------------------------------|------------------------|------------------------|
|               | 1990                                                                        | 2000                   | 2015                   | 1990                                                                        | 2000                   | 2015                   | 1990                                                                        | 2000                   | 2015                   | 1990                                                                                | 2000                   | 2015                   |
| Lesotho       | 18.73<br>(8.61-29.27)                                                       | 25.50<br>(17.91-32.76) | 51.44<br>(44.52-58.36) | 79.04<br>(63.30-89.75)                                                      | 78.62<br>(69.43-85.71) | 88.37<br>(82.13-92.87) | 81.17<br>(67.94-89.47)                                                      | 77.18<br>(67.30-85.38) | 77.54<br>(66.74-86.05) | 31.77<br>(23.71-41.25)                                                              | 26.32<br>(18.21-34.35) | 20.84<br>(5.47-32.38)  |
| Namibia       | 47.77<br>(40.30-55.37)                                                      | 54.89<br>(48.60-60.78) | 66.44<br>(60.85-71.54) | 66.49<br>(47.47-79.52)                                                      | 65.85<br>(50.70-78.27) | 74.44<br>(59.21-85.19) | 90.92<br>(85.48-95.04)                                                      | 93.47<br>(89.85-96.49) | 87.50<br>(81.63-92.17) | 32.13<br>(25.65-39.35)                                                              | 25.59<br>(17.84-34.19) | 41.25<br>(27.92-50.93) |
| South Africa  | 55.84<br>(51.73-59.81)                                                      | 56.30<br>(52.30-60.43) | 69.58<br>(66.60-72.43) | 69.41<br>(57.21-79.22)                                                      | 71.12<br>(60.72-80.71) | 84.24<br>(78.37-89.48) | 51.69<br>(32.69-66.62)                                                      | 56.62<br>(43.49-68.33) | 50.60<br>(30.32-66.43) | 34.72<br>(30.12-40.09)                                                              | 34.94<br>(30.44-40.24) | 34.45<br>(29.27-40.34) |
| Swaziland     | 45.68<br>(36.72-54.70)                                                      | 45.81<br>(38.08-53.04) | 59.13<br>(51.45-66.55) | 95.72<br>(92.31-98.07)                                                      | 91.77<br>(87.73-95.02) | 95.77<br>(92.16-97.91) | 62.62<br>(42.68-77.12)                                                      | 66.17<br>(51.38-78.00) | 73.37<br>(59.22-84.46) | 37.94<br>(29.37-46.55)                                                              | 36.43<br>(27.18-43.77) | 34.14<br>(16.94-47.50) |
| Zimbabwe      | 55.60<br>(50.13-61.20)                                                      | 51.23<br>(45.58-56.52) | 59.43<br>(54.29-64.83) | 87.94<br>(80.13-93.36)                                                      | 74.93<br>(59.25-85.35) | 88.73<br>(81.40-93.74) | 82.49<br>(76.02-88.19)                                                      | 74.70<br>(65.89-81.70) | 86.70<br>(80.68-91.23) | 30.63<br>(24.86-36.81)                                                              | 22.49<br>(13.30-29.69) | 27.05<br>(12.79-37.92) |
| Benin         | 36.16<br>(24.96-46.45)                                                      | 38.87<br>(31.23-46.82) | 35.51<br>(25.49-45.51) | 59.26<br>(35.69-77.09)                                                      | 64.57<br>(50.74-76.76) | 59.62<br>(38.68-75.45) | 93.04<br>(88.02-96.56)                                                      | 86.48<br>(81.13-90.81) | 50.90<br>(36.12-64.24) | 18.67<br>(11.25-26.58)                                                              | 19.96<br>(12.97-28.25) | 22.74<br>(7.67-35.67)  |
| Burkina Faso  | 37.70<br>(30.14-45.09)                                                      | 34.17<br>(27.70-40.49) | 53.27<br>(44.81-61.36) | 42.04<br>(15.87-64.61)                                                      | 34.35<br>(7.39-57.81)  | 50.30<br>(23.77-69.27) | 92.24<br>(88.04-95.44)                                                      | 85.47<br>(80.83-89.66) | 77.83<br>(68.60-85.88) | 22.47<br>(16.25-29.51)                                                              | 21.25<br>(14.36-28.73) | 24.92<br>(13.84-37.46) |
| Cameroon      | 44.98<br>(35.69-53.62)                                                      | 45.16<br>(37.06-52.32) | 57.64<br>(48.30-65.51) | 81.49<br>(71.80-89.17)                                                      | 77.47<br>(67.88-85.76) | 80.48<br>(69.16-88.74) | 77.91<br>(69.74-84.63)                                                      | 71.57<br>(62.69-78.93) | 68.27<br>(56.58-78.02) | 20.65<br>(14.67-27.42)                                                              | 17.86<br>(10.96-25.37) | 20.91<br>(8.01-33.11)  |
| Cape Verde    | 68.07<br>(61.31-74.38)                                                      | 74.24<br>(68.11-79.52) | 84.43<br>(79.53-88.08) | 77.55<br>(65.64-86.15)                                                      | 74.11<br>(58.29-84.67) | 77.02<br>(62.24-87.14) | 84.96<br>(76.12-90.98)                                                      | 79.93<br>(69.88-87.95) | 72.85<br>(60.20-82.55) | 41.16<br>(36.23-46.07)                                                              | 44.82<br>(37.49-50.56) | 48.88<br>(43.43-53.64) |
| Chad          | 33.01<br>(21.75-43.93)                                                      | 37.59<br>(29.82-45.16) | 47.76<br>(38.00-56.79) | 45.82<br>(18.82-67.61)                                                      | 47.54<br>(28.25-64.32) | 46.94<br>(21.45-67.25) | 93.70<br>(89.74-96.95)                                                      | 88.58<br>(83.43-92.66) | 82.50<br>(72.92-89.70) | 19.96<br>(12.48-27.49)                                                              | 16.86<br>(9.35-25.27)  | 20.08<br>(4.53-34.80)  |
| Cote d'Ivoire | 57.54<br>(49.73-64.83)                                                      | 49.44<br>(40.69-57.26) | 55.78<br>(46.30-64.08) | 68.19<br>(53.91-79.33)                                                      | 73.50<br>(61.55-83.13) | 72.45<br>(57.41-83.82) | 82.48<br>(77.17-87.15)                                                      | 83.06<br>(77.04-88.06) | 82.53<br>(75.68-87.97) | 19.77<br>(13.45-26.75)                                                              | 15.93<br>(8.12-23.58)  | 20.78<br>(8.72-34.34)  |

**Appendix Table 1a. Scaled values for each SDG health-related indicator and three summary indicators by country for 1990, 2000, and 2015**

| Location              | Indicator 2.2.1: Prevalence of stunting among children under 5 years of age |                        |                        | Indicator 2.2.2a: Prevalence of wasting among children under 5 years of age |                        |                        | Indicator 2.2.2b: Prevalence of overweight among children aged 2 to 4 years |                        |                        | Indicator 3.1.1: Maternal mortality ratio (maternal deaths per 100,000 live births) |                        |                        |
|-----------------------|-----------------------------------------------------------------------------|------------------------|------------------------|-----------------------------------------------------------------------------|------------------------|------------------------|-----------------------------------------------------------------------------|------------------------|------------------------|-------------------------------------------------------------------------------------|------------------------|------------------------|
|                       | 1990                                                                        | 2000                   | 2015                   | 1990                                                                        | 2000                   | 2015                   | 1990                                                                        | 2000                   | 2015                   | 1990                                                                                | 2000                   | 2015                   |
| The Gambia            | 51.62<br>(42.55-60.47)                                                      | 59.57<br>(52.94-65.70) | 67.76<br>(61.81-73.32) | 56.63<br>(31.29-75.85)                                                      | 59.05<br>(41.46-73.61) | 65.91<br>(51.06-78.71) | 80.49<br>(71.12-87.77)                                                      | 74.55<br>(63.31-83.10) | 81.61<br>(72.21-88.65) | 19.69<br>(6.26-33.15)                                                               | 20.41<br>(13.56-28.09) | 24.40<br>(14.02-34.03) |
| Ghana                 | 45.17<br>(38.59-51.83)                                                      | 50.11<br>(42.90-56.55) | 72.76<br>(67.83-77.16) | 68.95<br>(59.25-78.43)                                                      | 67.43<br>(56.04-77.16) | 82.02<br>(74.18-88.35) | 94.57<br>(91.77-97.10)                                                      | 88.19<br>(83.93-91.90) | 88.25<br>(82.61-92.49) | 20.11<br>(11.74-28.78)                                                              | 19.53<br>(12.50-26.89) | 27.70<br>(13.23-39.17) |
| Guinea                | 48.72<br>(39.35-57.28)                                                      | 43.47<br>(37.34-50.00) | 53.45<br>(45.34-61.46) | 58.98<br>(38.60-74.28)                                                      | 66.41<br>(55.51-76.28) | 66.28<br>(51.50-79.34) | 83.90<br>(75.81-90.28)                                                      | 84.76<br>(79.04-89.33) | 81.63<br>(72.22-89.13) | 14.36<br>(7.27-21.97)                                                               | 14.80<br>(8.07-22.14)  | 17.35<br>(6.75-29.68)  |
| Guinea-Bissau         | 42.09<br>(31.09-52.77)                                                      | 43.86<br>(35.82-51.53) | 53.70<br>(44.87-62.62) | 62.95<br>(40.86-78.92)                                                      | 63.36<br>(47.87-76.08) | 77.05<br>(63.12-86.78) | 87.97<br>(80.39-93.38)                                                      | 83.93<br>(75.87-90.26) | 70.82<br>(58.65-81.04) | 21.69<br>(5.20-38.90)                                                               | 21.25<br>(3.18-39.94)  | 21.16<br>(0.00-38.44)  |
| Liberia               | 46.92<br>(37.54-55.96)                                                      | 37.58<br>(29.42-45.47) | 54.03<br>(46.08-61.71) | 68.26<br>(49.93-81.22)                                                      | 71.51<br>(59.57-81.27) | 77.48<br>(66.19-86.28) | 72.09<br>(58.33-82.25)                                                      | 80.22<br>(70.82-86.84) | 79.27<br>(69.59-87.06) | 13.91<br>(5.55-22.84)                                                               | 15.46<br>(7.85-23.69)  | 17.21<br>(5.63-28.11)  |
| Mali                  | 46.02<br>(37.29-54.15)                                                      | 38.94<br>(30.55-47.24) | 49.08<br>(39.51-57.72) | 51.26<br>(29.76-67.97)                                                      | 49.90<br>(32.29-65.36) | 54.19<br>(34.57-72.05) | 94.88<br>(91.59-97.68)                                                      | 87.75<br>(83.25-91.54) | 74.93<br>(62.31-84.46) | 16.80<br>(10.78-23.91)                                                              | 18.67<br>(12.48-25.31) | 24.90<br>(14.55-36.59) |
| Mauritania            | 18.35<br>(8.84-27.54)                                                       | 42.07<br>(34.05-49.68) | 66.31<br>(58.19-73.40) | 48.59<br>(27.91-65.32)                                                      | 55.46<br>(34.04-70.48) | 65.47<br>(46.62-80.05) | 88.91<br>(82.40-93.80)                                                      | 86.92<br>(81.64-90.98) | 84.33<br>(74.99-90.86) | 13.13<br>(6.16-20.41)                                                               | 16.92<br>(10.16-25.90) | 22.22<br>(10.11-34.60) |
| Niger                 | 31.40<br>(22.74-39.75)                                                      | 23.64<br>(16.40-31.49) | 36.26<br>(26.80-45.59) | 29.12<br>(6.68-50.12)                                                       | 41.45<br>(24.05-57.52) | 41.95<br>(17.40-61.89) | 94.64<br>(91.00-97.28)                                                      | 94.62<br>(91.37-97.33) | 90.16<br>(84.91-94.24) | 21.18<br>(13.91-28.80)                                                              | 20.18<br>(13.19-27.74) | 23.90<br>(13.35-35.19) |
| Nigeria               | 23.59<br>(15.41-31.95)                                                      | 29.14<br>(22.60-35.95) | 52.83<br>(45.65-59.58) | 51.23<br>(31.01-67.43)                                                      | 54.81<br>(40.82-68.50) | 57.71<br>(39.89-71.95) | 87.88<br>(84.25-91.04)                                                      | 78.66<br>(71.77-84.56) | 73.22<br>(62.49-81.69) | 20.65<br>(10.37-31.79)                                                              | 20.09<br>(12.69-27.59) | 27.77<br>(14.23-37.23) |
| Sao Tome and Principe | 53.18<br>(44.27-61.62)                                                      | 58.46<br>(51.26-64.85) | 73.43<br>(66.18-79.29) | 78.76<br>(66.36-87.44)                                                      | 78.35<br>(68.41-86.14) | 70.85<br>(53.29-84.19) | 79.53<br>(69.55-87.48)                                                      | 76.72<br>(67.37-84.49) | 70.32<br>(58.66-79.80) | 29.69<br>(23.02-36.91)                                                              | 27.52<br>(21.61-33.59) | 35.07<br>(23.34-46.68) |
| Senegal               | 51.85<br>(44.92-58.54)                                                      | 58.30<br>(51.46-65.00) | 70.62<br>(64.83-75.24) | 75.80<br>(67.24-83.19)                                                      | 67.20<br>(55.91-77.32) | 74.66<br>(65.29-82.84) | 91.42<br>(87.66-94.53)                                                      | 92.38<br>(87.84-95.80) | 92.47<br>(88.10-96.00) | 20.13<br>(13.78-27.39)                                                              | 19.67<br>(13.39-26.61) | 22.08<br>(6.50-34.84)  |

**Appendix Table 1a. Scaled values for each SDG health-related indicator and three summary indicators by country for 1990, 2000, and 2015**

| Location     | Indicator 2.2.1: Prevalence of stunting among children under 5 years of age |                        |                        | Indicator 2.2.2a: Prevalence of wasting among children under 5 years of age |                        |                        | Indicator 2.2.2b: Prevalence of overweight among children aged 2 to 4 years |                        |                         | Indicator 3.1.1: Maternal mortality ratio (maternal deaths per 100,000 live births) |                        |                        |
|--------------|-----------------------------------------------------------------------------|------------------------|------------------------|-----------------------------------------------------------------------------|------------------------|------------------------|-----------------------------------------------------------------------------|------------------------|-------------------------|-------------------------------------------------------------------------------------|------------------------|------------------------|
|              | 1990                                                                        | 2000                   | 2015                   | 1990                                                                        | 2000                   | 2015                   | 1990                                                                        | 2000                   | 2015                    | 1990                                                                                | 2000                   | 2015                   |
| Sierra Leone | 40.43<br>(33.78-47.03)                                                      | 37.88<br>(30.54-45.00) | 45.69<br>(37.91-53.00) | 69.03<br>(61.04-77.26)                                                      | 57.13<br>(44.44-69.66) | 66.83<br>(54.70-77.27) | 85.67<br>(77.49-91.85)                                                      | 81.23<br>(72.80-88.32) | 67.82<br>(55.43-78.38)  | 24.09<br>(12.20-35.22)                                                              | 17.39<br>(10.53-24.92) | 15.25<br>(5.18-26.79)  |
| Togo         | 43.10<br>(36.48-48.86)                                                      | 50.60<br>(44.25-56.54) | 63.62<br>(57.74-68.70) | 76.76<br>(63.99-86.26)                                                      | 62.36<br>(44.18-76.95) | 77.05<br>(64.78-86.36) | 95.49<br>(92.68-98.03)                                                      | 90.79<br>(85.99-94.51) | 88.26<br>(80.78-93.68)  | 20.84<br>(14.22-27.72)                                                              | 20.06<br>(12.87-28.34) | 26.86<br>(15.89-37.83) |
| Burundi      | 20.88<br>(10.31-31.32)                                                      | 13.85<br>(6.67-20.69)  | 20.95<br>(7.22-34.46)  | 76.58<br>(63.63-85.86)                                                      | 72.94<br>(64.56-80.66) | 77.75<br>(61.10-88.86) | 94.76<br>(90.29-98.12)                                                      | 92.46<br>(85.60-97.18) | 91.80<br>(85.69-96.57)  | 9.03<br>(0.00-20.87)                                                                | 9.45<br>(2.28-17.31)   | 23.67<br>(10.55-35.59) |
| Comoros      | 37.73<br>(23.79-52.49)                                                      | 24.17<br>(17.29-30.69) | 52.98<br>(42.92-62.35) | 84.87<br>(79.01-89.89)                                                      | 52.40<br>(39.23-65.58) | 56.98<br>(31.96-74.64) | 71.79<br>(57.68-83.79)                                                      | 59.65<br>(44.01-72.54) | 61.09<br>(39.77-76.87)  | 17.99<br>(6.37-30.44)                                                               | 20.06<br>(13.54-26.72) | 31.29<br>(20.16-41.99) |
| Djibouti     | 58.49<br>(52.94-63.45)                                                      | 56.35<br>(50.55-61.76) | 60.44<br>(46.71-71.83) | 58.61<br>(46.44-70.20)                                                      | 40.64<br>(22.46-58.38) | 44.50<br>(0.08-74.61)  | 86.52<br>(76.53-93.88)                                                      | 77.32<br>(62.68-87.55) | 53.21<br>(33.01-70.73)  | 24.07<br>(12.93-35.36)                                                              | 20.59<br>(6.37-33.60)  | 21.61<br>(5.59-34.65)  |
| Eritrea      | 7.76<br>(0.00-19.12)                                                        | 36.42<br>(28.90-43.29) | 38.27<br>(21.99-53.62) | 60.88<br>(39.73-76.44)                                                      | 45.66<br>(28.11-62.69) | 58.97<br>(20.84-82.76) | 95.17<br>(90.28-98.68)                                                      | 95.80<br>(92.50-98.39) | 99.25<br>(96.41-100.00) | 12.65<br>(5.30-20.16)                                                               | 16.60<br>(5.70-28.56)  | 15.60<br>(0.00-31.85)  |
| Ethiopia     | 15.04<br>(0.00-30.83)                                                       | 17.07<br>(10.95-23.70) | 40.96<br>(29.46-52.25) | 54.63<br>(19.45-79.02)                                                      | 56.30<br>(44.88-68.79) | 63.98<br>(42.00-80.20) | 95.39<br>(90.32-99.00)                                                      | 94.18<br>(90.05-97.34) | 87.55<br>(78.63-94.16)  | 12.98<br>(6.22-20.50)                                                               | 13.81<br>(6.93-20.59)  | 23.03<br>(10.86-34.77) |
| Kenya        | 39.01<br>(34.81-43.09)                                                      | 43.44<br>(39.90-46.99) | 62.63<br>(60.14-65.21) | 73.86<br>(68.05-80.39)                                                      | 72.41<br>(66.90-79.09) | 86.36<br>(83.47-89.65) | 79.57<br>(69.62-87.90)                                                      | 81.85<br>(74.53-87.87) | 84.22<br>(76.61-89.83)  | 23.29<br>(17.61-29.67)                                                              | 19.09<br>(13.00-25.74) | 24.52<br>(18.63-30.97) |
| Madagascar   | 16.68<br>(6.26-26.93)                                                       | 20.00<br>(12.59-27.26) | 32.93<br>(17.54-48.36) | 53.06<br>(25.83-72.08)                                                      | 55.13<br>(35.11-70.91) | 39.31<br>(0.00-72.42)  | 90.19<br>(84.44-94.67)                                                      | 91.02<br>(86.63-94.65) | 87.00<br>(77.56-94.14)  | 22.96<br>(17.40-29.46)                                                              | 21.78<br>(14.56-34.93) | 26.01<br>(12.65-39.98) |
| Malawi       | 18.37<br>(8.88-27.60)                                                       | 19.20<br>(12.24-25.92) | 38.76<br>(30.07-47.08) | 78.16<br>(64.68-87.73)                                                      | 73.28<br>(61.74-82.66) | 82.19<br>(72.74-89.57) | 61.60<br>(48.36-72.95)                                                      | 60.98<br>(50.73-70.52) | 76.71<br>(67.49-84.31)  | 19.04<br>(13.10-26.08)                                                              | 17.26<br>(9.09-24.69)  | 31.26<br>(19.80-42.63) |
| Mozambique   | 14.22<br>(0.18-27.74)                                                       | 28.19<br>(20.85-35.63) | 43.92<br>(31.39-56.32) | 66.49<br>(41.31-83.41)                                                      | 75.24<br>(66.20-83.43) | 79.02<br>(64.46-89.16) | 82.31<br>(70.98-90.78)                                                      | 75.68<br>(66.97-83.12) | 70.57<br>(57.39-80.87)  | 24.21<br>(17.62-31.72)                                                              | 24.39<br>(18.02-32.82) | 26.74<br>(11.34-39.69) |

**Appendix Table 1a. Scaled values for each SDG health-related indicator and three summary indicators by country for 1990, 2000, and 2015**

| Location                         | Indicator 2.2.1: Prevalence of stunting among children under 5 years of age |                        |                        | Indicator 2.2.2a: Prevalence of wasting among children under 5 years of age |                        |                        | Indicator 2.2.2b: Prevalence of overweight among children aged 2 to 4 years |                        |                        | Indicator 3.1.1: Maternal mortality ratio (maternal deaths per 100,000 live births) |                        |                        |
|----------------------------------|-----------------------------------------------------------------------------|------------------------|------------------------|-----------------------------------------------------------------------------|------------------------|------------------------|-----------------------------------------------------------------------------|------------------------|------------------------|-------------------------------------------------------------------------------------|------------------------|------------------------|
|                                  | 1990                                                                        | 2000                   | 2015                   | 1990                                                                        | 2000                   | 2015                   | 1990                                                                        | 2000                   | 2015                   | 1990                                                                                | 2000                   | 2015                   |
| Rwanda                           | 19.77<br>(9.40-30.22)                                                       | 28.79<br>(21.83-35.32) | 44.58<br>(36.47-52.78) | 71.89<br>(53.28-85.42)                                                      | 72.50<br>(60.03-82.75) | 90.60<br>(84.46-94.81) | 77.65<br>(69.69-84.48)                                                      | 75.35<br>(68.24-81.90) | 62.29<br>(47.26-74.84) | 15.42<br>(7.95-23.13)                                                               | 13.41<br>(6.58-20.68)  | 24.40<br>(12.49-36.08) |
| Somalia                          | 56.97<br>(41.97-69.46)                                                      | 54.34<br>(48.97-59.29) | 43.84<br>(28.75-57.85) | 56.39<br>(19.73-79.56)                                                      | 13.36<br>(0.00-36.78)  | 54.81<br>(23.48-78.70) | 83.38<br>(72.07-91.82)                                                      | 88.73<br>(80.35-95.21) | 86.01<br>(74.91-93.67) | 15.16<br>(0.00-36.01)                                                               | 15.68<br>(0.01-36.85)  | 17.06<br>(0.36-36.02)  |
| South Sudan                      | 31.18<br>(13.20-47.13)                                                      | 31.13<br>(20.88-41.53) | 53.95<br>(42.25-64.46) | 42.37<br>(0.00-73.36)                                                       | 32.46<br>(8.72-52.47)  | 29.91<br>(0.00-62.45)  | 72.90<br>(56.87-85.40)                                                      | 73.61<br>(59.61-84.89) | 72.29<br>(55.65-84.37) | 19.91<br>(2.95-38.52)                                                               | 20.65<br>(2.58-39.52)  | 19.73<br>(0.00-37.20)  |
| Tanzania                         | 27.22<br>(19.21-34.66)                                                      | 29.91<br>(23.57-36.73) | 44.87<br>(31.16-56.99) | 70.03<br>(52.89-82.52)                                                      | 80.59<br>(71.41-87.71) | 81.10<br>(65.90-90.81) | 78.20<br>(71.91-83.76)                                                      | 82.60<br>(77.71-87.10) | 81.58<br>(72.26-89.43) | 18.15<br>(12.00-25.13)                                                              | 19.42<br>(12.70-26.42) | 26.42<br>(10.66-39.13) |
| Uganda                           | 31.88<br>(25.00-38.71)                                                      | 34.79<br>(28.68-40.64) | 55.01<br>(44.49-64.24) | 86.14<br>(77.52-92.41)                                                      | 73.27<br>(57.64-83.96) | 82.19<br>(68.57-91.54) | 78.32<br>(71.58-83.95)                                                      | 77.64<br>(71.94-82.76) | 82.08<br>(72.70-89.06) | 24.49<br>(18.23-30.93)                                                              | 21.98<br>(15.44-28.49) | 28.30<br>(15.02-40.80) |
| Zambia                           | 26.74<br>(14.83-38.24)                                                      | 20.71<br>(13.10-28.12) | 40.86<br>(29.44-51.41) | 83.47<br>(71.68-90.93)                                                      | 82.30<br>(75.14-88.50) | 79.53<br>(66.33-88.74) | 70.39<br>(58.27-80.22)                                                      | 59.19<br>(48.88-68.58) | 44.75<br>(24.28-62.44) | 23.88<br>(17.84-30.14)                                                              | 21.59<br>(14.38-28.64) | 29.80<br>(17.28-41.25) |
| Angola                           | 18.21<br>(6.45-30.07)                                                       | 27.48<br>(17.84-37.12) | 61.88<br>(52.52-70.23) | 74.44<br>(59.54-84.99)                                                      | 70.44<br>(57.91-80.37) | 80.08<br>(67.63-87.95) | 86.34<br>(78.46-92.54)                                                      | 80.23<br>(69.89-88.09) | 56.10<br>(37.37-71.25) | 17.34<br>(2.08-36.75)                                                               | 18.71<br>(2.01-39.18)  | 22.53<br>(2.15-40.14)  |
| Central African Republic         | 34.75<br>(22.89-44.93)                                                      | 35.43<br>(24.79-44.77) | 45.27<br>(34.54-56.17) | 69.55<br>(55.86-80.59)                                                      | 64.53<br>(49.91-76.12) | 70.52<br>(55.99-82.11) | 76.67<br>(66.43-84.86)                                                      | 77.50<br>(67.44-85.84) | 83.60<br>(73.96-91.07) | 11.28<br>(4.03-18.68)                                                               | 11.04<br>(0.00-25.81)  | 11.66<br>(0.00-30.18)  |
| Congo                            | 43.27<br>(31.46-53.83)                                                      | 50.76<br>(40.20-60.03) | 65.82<br>(57.85-72.80) | 69.77<br>(54.61-82.01)                                                      | 72.30<br>(59.11-82.79) | 78.96<br>(68.55-86.74) | 77.33<br>(64.70-86.46)                                                      | 78.48<br>(68.08-86.38) | 83.88<br>(75.18-90.22) | 21.34<br>(12.23-29.82)                                                              | 16.02<br>(8.03-23.71)  | 20.86<br>(7.47-33.84)  |
| Democratic Republic of the Congo | 28.90<br>(17.53-39.58)                                                      | 30.02<br>(19.81-39.31) | 42.83<br>(32.71-51.58) | 59.74<br>(40.73-74.85)                                                      | 54.53<br>(37.04-69.60) | 70.66<br>(57.26-81.44) | 58.73<br>(39.28-73.44)                                                      | 70.23<br>(57.47-80.77) | 84.07<br>(74.77-90.72) | 23.60<br>(14.86-33.89)                                                              | 25.24<br>(18.83-32.05) | 20.63<br>(10.26-32.12) |
| Equatorial Guinea                | 18.93<br>(7.41-30.43)                                                       | 41.75<br>(32.46-50.16) | 74.21<br>(67.67-80.11) | 77.91<br>(66.36-86.92)                                                      | 80.49<br>(72.72-87.14) | 88.40<br>(81.35-93.31) | 69.17<br>(54.53-81.00)                                                      | 59.87<br>(43.46-72.67) | 30.21<br>(8.77-48.78)  | 13.34<br>(0.00-33.68)                                                               | 18.79<br>(2.03-38.15)  | 25.76<br>(4.48-40.35)  |

**Appendix Table 1a. Scaled values for each SDG health-related indicator and three summary indicators by country for 1990, 2000, and 2015**

| Location | Indicator 2.2.1: Prevalence of stunting among children under 5 years of age |                        |                        | Indicator 2.2.2a: Prevalence of wasting among children under 5 years of age |                        |                        | Indicator 2.2.2b: Prevalence of overweight among children aged 2 to 4 years |                        |                        | Indicator 3.1.1: Maternal mortality ratio (maternal deaths per 100,000 live births) |                        |                        |
|----------|-----------------------------------------------------------------------------|------------------------|------------------------|-----------------------------------------------------------------------------|------------------------|------------------------|-----------------------------------------------------------------------------|------------------------|------------------------|-------------------------------------------------------------------------------------|------------------------|------------------------|
|          | 1990                                                                        | 2000                   | 2015                   | 1990                                                                        | 2000                   | 2015                   | 1990                                                                        | 2000                   | 2015                   | 1990                                                                                | 2000                   | 2015                   |
| Gabon    | 55.94<br>(44.85-65.48)                                                      | 62.23<br>(54.11-69.81) | 74.49<br>(67.34-80.09) | 82.55<br>(73.01-89.51)                                                      | 84.44<br>(77.53-90.17) | 86.85<br>(80.52-92.16) | 80.91<br>(71.12-88.79)                                                      | 78.08<br>(69.59-85.01) | 71.13<br>(59.89-80.46) | 25.67<br>(19.15-32.29)                                                              | 22.03<br>(14.72-28.91) | 32.83<br>(21.32-42.72) |

**Appendix Table 1a. Scaled values for each SDG health-related indicator and three summary indicators by country for 1990, 2000, and 2015**

| Location      | Indicator 3.1.2: Proportion of births attended by skilled health personnel (doctors, nurses, midwives, or country-specific medical staff [e.g., clinical officers]) |                        |                        | Indicator 3.2.1: Under-5 mortality rate (probability of dying before the age of 5 per 1,000 live births) |                        |                         | Indicator 3.2.2: Neonatal mortality rate (probability of dying during the first 28 days of life per 1,000 live births) |                        |                         | Indicator 3.3.1: Age-standardised rate of new HIV infections (per 1,000 population) |                        |                        |
|---------------|---------------------------------------------------------------------------------------------------------------------------------------------------------------------|------------------------|------------------------|----------------------------------------------------------------------------------------------------------|------------------------|-------------------------|------------------------------------------------------------------------------------------------------------------------|------------------------|-------------------------|-------------------------------------------------------------------------------------|------------------------|------------------------|
|               | 1990                                                                                                                                                                | 2000                   | 2015                   | 1990                                                                                                     | 2000                   | 2015                    | 1990                                                                                                                   | 2000                   | 2015                    | 1990                                                                                | 2000                   | 2015                   |
| Canada        | 98.52<br>(97.89-99.02)                                                                                                                                              | 99.05<br>(98.65-99.40) | 99.38<br>(99.06-99.64) | 73.11<br>(70.16-76.55)                                                                                   | 78.89<br>(75.99-82.04) | 82.52<br>(79.61-84.99)  | 73.68<br>(71.03-76.38)                                                                                                 | 79.77<br>(77.29-82.33) | 83.46<br>(81.16-85.11)  | 41.49<br>(37.51-46.03)                                                              | 50.13<br>(45.38-54.52) | 53.85<br>(44.82-64.93) |
| United States | 98.49<br>(97.92-98.99)                                                                                                                                              | 98.42<br>(97.87-98.91) | 99.22<br>(98.83-99.53) | 67.61<br>(64.62-71.09)                                                                                   | 73.69<br>(70.75-77.03) | 79.35<br>(76.48-82.20)  | 68.11<br>(65.43-70.83)                                                                                                 | 74.39<br>(71.77-77.02) | 80.29<br>(78.04-82.33)  | 36.39<br>(34.60-38.20)                                                              | 42.67<br>(40.71-44.73) | 45.59<br>(42.89-48.34) |
| Australia     | 99.01<br>(98.70-99.27)                                                                                                                                              | 99.19<br>(98.93-99.42) | 99.54<br>(99.36-99.71) | 70.70<br>(67.70-74.15)                                                                                   | 78.57<br>(75.62-81.68) | 86.88<br>(84.00-89.30)  | 71.76<br>(69.07-74.62)                                                                                                 | 79.68<br>(77.09-82.33) | 88.50<br>(86.43-90.30)  | 49.02<br>(44.01-53.31)                                                              | 55.27<br>(48.32-62.07) | 59.74<br>(52.24-66.78) |
| New Zealand   | 98.91<br>(98.60-99.16)                                                                                                                                              | 99.19<br>(98.95-99.41) | 99.57<br>(99.40-99.73) | 68.06<br>(65.18-71.36)                                                                                   | 75.42<br>(72.70-78.50) | 81.69<br>(78.78-84.17)  | 73.71<br>(71.14-76.35)                                                                                                 | 80.22<br>(78.06-82.60) | 86.44<br>(84.30-88.08)  | 53.98<br>(50.31-57.25)                                                              | 55.28<br>(48.82-61.63) | 61.10<br>(53.14-68.96) |
| Brunei        | 99.18<br>(99.04-99.30)                                                                                                                                              | 99.19<br>(99.05-99.30) | 99.29<br>(99.16-99.42) | 69.63<br>(67.29-72.96)                                                                                   | 72.21<br>(69.98-74.84) | 72.15<br>(68.75-75.02)  | 77.09<br>(74.23-80.14)                                                                                                 | 78.58<br>(76.10-81.18) | 77.55<br>(74.46-79.89)  | 53.39<br>(43.93-68.09)                                                              | 51.25<br>(39.03-59.57) | 54.10<br>(46.93-62.94) |
| Japan         | 99.12<br>(98.99-99.25)                                                                                                                                              | 99.18<br>(99.05-99.32) | 99.28<br>(99.15-99.41) | 78.96<br>(76.04-82.12)                                                                                   | 84.14<br>(81.13-87.12) | 93.35<br>(90.26-95.32)  | 83.79<br>(81.14-86.47)                                                                                                 | 88.92<br>(86.46-91.43) | 97.50<br>(95.44-98.87)  | 69.00<br>(67.31-70.60)                                                              | 69.94<br>(68.27-71.61) | 69.56<br>(67.66-71.45) |
| Singapore     | 98.75<br>(98.59-98.91)                                                                                                                                              | 99.17<br>(99.03-99.30) | 99.42<br>(99.30-99.54) | 74.86<br>(71.89-78.01)                                                                                   | 88.09<br>(85.21-90.86) | 97.32<br>(93.94-99.09)  | 76.95<br>(74.17-79.84)                                                                                                 | 90.82<br>(88.43-93.20) | 98.17<br>(96.04-99.38)  | 46.09<br>(41.28-50.32)                                                              | 47.31<br>(45.31-49.25) | 54.14<br>(50.21-57.53) |
| South Korea   | 98.68<br>(98.51-98.84)                                                                                                                                              | 99.16<br>(99.03-99.30) | 99.42<br>(99.29-99.53) | 66.40<br>(61.74-70.42)                                                                                   | 76.16<br>(73.10-79.36) | 90.49<br>(86.30-94.52)  | 70.91<br>(63.63-75.83)                                                                                                 | 80.38<br>(77.69-83.02) | 94.92<br>(91.38-98.52)  | 52.79<br>(50.45-54.85)                                                              | 52.92<br>(45.52-57.92) | 60.34<br>(57.36-63.03) |
| Andorra       | 99.54<br>(99.39-99.67)                                                                                                                                              | 99.61<br>(99.48-99.75) | 99.69<br>(99.57-99.82) | 79.11<br>(75.87-82.39)                                                                                   | 92.21<br>(89.22-95.27) | 99.54<br>(96.50-100.00) | 80.00<br>(76.48-83.50)                                                                                                 | 93.64<br>(90.46-96.38) | 99.16<br>(96.14-100.00) | 44.30<br>(18.14-58.62)                                                              | 49.03<br>(34.15-58.64) | 51.83<br>(38.00-67.56) |
| Austria       | 99.14<br>(98.95-99.32)                                                                                                                                              | 99.36<br>(99.20-99.52) | 99.57<br>(99.43-99.71) | 70.61<br>(67.60-74.03)                                                                                   | 80.40<br>(77.23-83.53) | 88.89<br>(85.38-90.80)  | 70.98<br>(68.14-73.62)                                                                                                 | 81.50<br>(78.67-84.27) | 90.06<br>(87.56-91.45)  | 46.62<br>(37.46-65.05)                                                              | 48.00<br>(39.79-57.02) | 52.98<br>(44.53-61.99) |
| Belgium       | 99.10<br>(98.90-99.29)                                                                                                                                              | 99.31<br>(99.13-99.47) | 99.49<br>(99.34-99.64) | 69.91<br>(67.00-73.22)                                                                                   | 79.20<br>(76.30-82.30) | 87.50<br>(84.31-89.59)  | 71.46<br>(68.74-73.97)                                                                                                 | 80.76<br>(78.25-83.20) | 89.42<br>(86.99-90.74)  | 45.08<br>(39.28-50.13)                                                              | 50.28<br>(42.70-57.09) | 56.57<br>(49.72-64.17) |

**Appendix Table 1a. Scaled values for each SDG health-related indicator and three summary indicators by country for 1990, 2000, and 2015**

| Location   | Indicator 3.1.2: Proportion of births attended by skilled health personnel (doctors, nurses, midwives, or country-specific medical staff [e.g., clinical officers]) |                        |                        | Indicator 3.2.1: Under-5 mortality rate (probability of dying before the age of 5 per 1,000 live births) |                        |                         | Indicator 3.2.2: Neonatal mortality rate (probability of dying during the first 28 days of life per 1,000 live births) |                        |                         | Indicator 3.3.1: Age-standardised rate of new HIV infections (per 1,000 population) |                        |                        |
|------------|---------------------------------------------------------------------------------------------------------------------------------------------------------------------|------------------------|------------------------|----------------------------------------------------------------------------------------------------------|------------------------|-------------------------|------------------------------------------------------------------------------------------------------------------------|------------------------|-------------------------|-------------------------------------------------------------------------------------|------------------------|------------------------|
|            | 1990                                                                                                                                                                | 2000                   | 2015                   | 1990                                                                                                     | 2000                   | 2015                    | 1990                                                                                                                   | 2000                   | 2015                    | 1990                                                                                | 2000                   | 2015                   |
| Cyprus     | 98.89<br>(98.66-99.10)                                                                                                                                              | 99.19<br>(99.00-99.37) | 99.39<br>(99.22-99.54) | 64.73<br>(61.89-68.40)                                                                                   | 75.68<br>(72.71-78.85) | 83.48<br>(81.27-85.25)  | 62.85<br>(60.04-65.73)                                                                                                 | 74.96<br>(72.18-77.62) | 83.30<br>(80.17-85.32)  | 59.69<br>(50.37-68.22)                                                              | 56.76<br>(47.63-66.05) | 61.75<br>(51.72-81.76) |
| Denmark    | 99.25<br>(99.06-99.42)                                                                                                                                              | 99.44<br>(99.26-99.59) | 99.55<br>(99.40-99.68) | 71.57<br>(68.44-75.14)                                                                                   | 80.79<br>(77.85-83.74) | 88.81<br>(85.04-90.81)  | 70.93<br>(68.06-73.87)                                                                                                 | 80.67<br>(78.22-83.36) | 89.09<br>(85.98-90.80)  | 43.92<br>(38.90-48.86)                                                              | 47.55<br>(41.23-55.59) | 56.43<br>(48.31-66.71) |
| Finland    | 99.17<br>(98.97-99.35)                                                                                                                                              | 99.36<br>(99.20-99.51) | 99.58<br>(99.44-99.71) | 76.63<br>(73.56-80.05)                                                                                   | 85.83<br>(82.58-89.01) | 95.71<br>(90.79-98.32)  | 76.01<br>(73.04-79.22)                                                                                                 | 86.07<br>(83.31-88.92) | 95.13<br>(91.62-97.04)  | 61.14<br>(55.51-66.35)                                                              | 60.92<br>(53.71-68.28) | 69.12<br>(60.02-79.55) |
| France     | 99.09<br>(98.89-99.29)                                                                                                                                              | 99.30<br>(99.13-99.47) | 99.53<br>(99.38-99.67) | 72.15<br>(69.15-75.50)                                                                                   | 81.02<br>(77.98-84.06) | 90.23<br>(85.39-93.02)  | 74.83<br>(72.14-77.62)                                                                                                 | 83.86<br>(81.31-86.44) | 93.04<br>(88.92-95.39)  | 36.81<br>(34.22-39.15)                                                              | 46.04<br>(41.44-49.90) | 56.64<br>(50.86-61.59) |
| Germany    | 99.07<br>(98.87-99.28)                                                                                                                                              | 99.31<br>(99.14-99.48) | 99.50<br>(99.35-99.65) | 71.44<br>(68.49-74.81)                                                                                   | 81.55<br>(78.51-84.54) | 88.86<br>(86.38-90.29)  | 73.01<br>(70.30-75.65)                                                                                                 | 83.37<br>(80.94-85.80) | 90.79<br>(87.39-92.62)  | 51.04<br>(46.49-54.98)                                                              | 58.05<br>(51.83-63.63) | 57.09<br>(49.65-65.10) |
| Greece     | 98.77<br>(98.52-98.99)                                                                                                                                              | 99.04<br>(98.82-99.22) | 99.28<br>(99.09-99.44) | 69.07<br>(66.07-72.61)                                                                                   | 78.74<br>(75.81-81.69) | 90.03<br>(86.98-92.11)  | 67.68<br>(64.99-70.31)                                                                                                 | 77.63<br>(75.12-80.09) | 89.46<br>(87.22-90.78)  | 55.06<br>(53.19-56.86)                                                              | 62.71<br>(60.97-64.30) | 63.89<br>(60.71-66.50) |
| Iceland    | 99.16<br>(98.95-99.34)                                                                                                                                              | 99.32<br>(99.15-99.48) | 99.50<br>(99.35-99.64) | 77.73<br>(75.14-80.31)                                                                                   | 86.76<br>(84.96-88.48) | 98.54<br>(94.63-100.00) | 79.95<br>(77.64-82.42)                                                                                                 | 89.56<br>(87.43-91.31) | 99.49<br>(97.07-100.00) | 49.82<br>(43.13-55.64)                                                              | 53.97<br>(47.95-59.34) | 57.20<br>(48.95-68.04) |
| Ireland    | 98.61<br>(98.31-98.88)                                                                                                                                              | 99.15<br>(98.96-99.34) | 99.47<br>(99.32-99.60) | 70.86<br>(67.96-74.60)                                                                                   | 76.83<br>(73.80-79.84) | 88.96<br>(85.64-90.94)  | 71.53<br>(68.78-74.16)                                                                                                 | 77.23<br>(74.55-79.92) | 90.28<br>(87.84-91.63)  | 45.58<br>(40.95-49.38)                                                              | 53.19<br>(47.10-58.26) | 57.34<br>(51.51-62.54) |
| Israel     | 99.08<br>(98.89-99.27)                                                                                                                                              | 99.31<br>(99.13-99.47) | 99.46<br>(99.31-99.60) | 66.23<br>(63.34-69.72)                                                                                   | 75.68<br>(72.72-78.94) | 87.37<br>(84.22-89.47)  | 67.94<br>(65.13-70.85)                                                                                                 | 77.65<br>(75.06-80.33) | 90.03<br>(87.73-91.39)  | 48.90<br>(42.76-54.69)                                                              | 53.11<br>(46.31-59.83) | 55.50<br>(48.96-62.97) |
| Italy      | 99.09<br>(98.88-99.27)                                                                                                                                              | 99.27<br>(99.08-99.43) | 99.39<br>(99.22-99.53) | 70.86<br>(67.89-74.14)                                                                                   | 80.97<br>(77.97-84.09) | 91.05<br>(86.70-93.34)  | 68.28<br>(65.62-71.01)                                                                                                 | 79.28<br>(76.69-81.90) | 89.67<br>(86.19-91.64)  | 36.88<br>(28.50-44.80)                                                              | 47.99<br>(41.07-54.73) | 53.63<br>(46.23-61.05) |
| Luxembourg | 98.87<br>(98.63-99.09)                                                                                                                                              | 99.26<br>(99.08-99.44) | 99.55<br>(99.41-99.69) | 71.68<br>(68.88-74.78)                                                                                   | 83.67<br>(81.49-85.95) | 94.36<br>(90.70-96.00)  | 74.92<br>(72.50-77.39)                                                                                                 | 87.16<br>(85.16-89.19) | 97.26<br>(94.76-98.34)  | 47.50<br>(40.62-53.73)                                                              | 55.23<br>(48.01-62.23) | 56.23<br>(48.60-65.01) |

**Appendix Table 1a. Scaled values for each SDG health-related indicator and three summary indicators by country for 1990, 2000, and 2015**

| Location       | Indicator 3.1.2: Proportion of births attended by skilled health personnel (doctors, nurses, midwives, or country-specific medical staff [e.g., clinical officers]) |                        |                        | Indicator 3.2.1: Under-5 mortality rate (probability of dying before the age of 5 per 1,000 live births) |                        |                        | Indicator 3.2.2: Neonatal mortality rate (probability of dying during the first 28 days of life per 1,000 live births) |                        |                        | Indicator 3.3.1: Age-standardised rate of new HIV infections (per 1,000 population) |                        |                        |
|----------------|---------------------------------------------------------------------------------------------------------------------------------------------------------------------|------------------------|------------------------|----------------------------------------------------------------------------------------------------------|------------------------|------------------------|------------------------------------------------------------------------------------------------------------------------|------------------------|------------------------|-------------------------------------------------------------------------------------|------------------------|------------------------|
|                | 1990                                                                                                                                                                | 2000                   | 2015                   | 1990                                                                                                     | 2000                   | 2015                   | 1990                                                                                                                   | 2000                   | 2015                   | 1990                                                                                | 2000                   | 2015                   |
| Malta          | 98.05<br>(97.69-98.39)                                                                                                                                              | 98.62<br>(98.35-98.87) | 99.09<br>(98.89-99.28) | 70.62<br>(67.79-73.79)                                                                                   | 76.23<br>(74.10-78.85) | 78.63<br>(75.13-81.12) | 68.22<br>(65.72-70.74)                                                                                                 | 73.93<br>(71.49-76.17) | 76.14<br>(73.13-78.05) | 48.66<br>(42.50-53.63)                                                              | 53.73<br>(48.53-57.97) | 53.50<br>(47.28-60.32) |
| Netherlands    | 99.02<br>(98.82-99.22)                                                                                                                                              | 99.29<br>(99.12-99.46) | 99.52<br>(99.37-99.66) | 72.49<br>(69.47-75.89)                                                                                   | 77.98<br>(75.01-81.28) | 87.06<br>(83.63-89.07) | 72.33<br>(69.65-75.11)                                                                                                 | 77.86<br>(75.19-80.39) | 87.48<br>(84.80-89.02) | 40.29<br>(35.25-44.52)                                                              | 51.11<br>(45.52-55.64) | 59.87<br>(52.89-66.03) |
| Norway         | 99.36<br>(99.21-99.52)                                                                                                                                              | 99.56<br>(99.42-99.70) | 99.70<br>(99.57-99.83) | 72.02<br>(69.05-75.35)                                                                                   | 82.85<br>(79.79-85.84) | 93.51<br>(90.04-95.27) | 73.09<br>(70.26-76.07)                                                                                                 | 84.39<br>(81.81-87.07) | 94.90<br>(92.58-96.12) | 48.45<br>(41.59-54.76)                                                              | 56.11<br>(48.95-63.36) | 63.70<br>(55.90-72.10) |
| Portugal       | 98.63<br>(98.36-98.87)                                                                                                                                              | 99.06<br>(98.85-99.25) | 99.38<br>(99.23-99.53) | 63.34<br>(60.51-66.94)                                                                                   | 76.11<br>(73.36-79.13) | 91.89<br>(88.98-94.09) | 64.16<br>(61.35-66.97)                                                                                                 | 78.16<br>(75.76-80.62) | 94.27<br>(92.30-95.70) | 29.98<br>(24.99-35.30)                                                              | 28.53<br>(22.98-33.96) | 36.63<br>(30.09-44.43) |
| Spain          | 98.59<br>(98.32-98.84)                                                                                                                                              | 98.98<br>(98.75-99.20) | 99.28<br>(99.09-99.44) | 71.08<br>(68.11-74.35)                                                                                   | 81.08<br>(78.06-84.10) | 91.74<br>(88.26-93.54) | 71.87<br>(69.23-74.49)                                                                                                 | 82.09<br>(79.55-84.59) | 92.67<br>(90.27-93.86) | 31.21<br>(26.84-35.29)                                                              | 44.57<br>(40.54-47.96) | 48.92<br>(42.78-54.62) |
| Sweden         | 99.24<br>(99.05-99.41)                                                                                                                                              | 99.39<br>(99.22-99.56) | 99.57<br>(99.43-99.71) | 76.14<br>(73.07-79.44)                                                                                   | 87.22<br>(84.29-90.19) | 94.24<br>(90.65-95.88) | 75.60<br>(72.89-78.42)                                                                                                 | 87.75<br>(85.15-90.25) | 94.10<br>(91.69-95.25) | 49.71<br>(45.31-53.71)                                                              | 57.83<br>(52.65-62.90) | 64.85<br>(59.19-71.69) |
| Switzerland    | 99.27<br>(99.10-99.44)                                                                                                                                              | 99.41<br>(99.26-99.56) | 99.57<br>(99.43-99.71) | 72.50<br>(69.47-75.99)                                                                                   | 79.76<br>(76.85-82.77) | 86.47<br>(82.76-88.59) | 72.48<br>(69.76-75.11)                                                                                                 | 80.05<br>(77.41-82.61) | 86.99<br>(83.72-88.88) | 40.13<br>(34.98-46.24)                                                              | 55.77<br>(49.26-62.15) | 56.36<br>(48.46-66.96) |
| United Kingdom | 98.99<br>(98.76-99.19)                                                                                                                                              | 99.25<br>(99.07-99.43) | 99.47<br>(99.33-99.63) | 70.87<br>(68.03-74.20)                                                                                   | 77.96<br>(75.11-81.04) | 83.78<br>(80.82-86.09) | 71.84<br>(69.12-74.53)                                                                                                 | 78.79<br>(76.41-81.13) | 84.80<br>(82.54-86.29) | 53.06<br>(51.10-54.96)                                                              | 49.46<br>(47.05-51.89) | 51.33<br>(49.24-53.39) |
| Argentina      | 97.58<br>(96.99-98.09)                                                                                                                                              | 98.58<br>(98.26-98.87) | 98.87<br>(98.61-99.12) | 50.02<br>(47.41-54.50)                                                                                   | 56.97<br>(54.20-61.10) | 65.66<br>(62.89-68.99) | 46.88<br>(44.21-49.57)                                                                                                 | 54.53<br>(51.83-57.30) | 66.13<br>(63.76-68.23) | 32.79<br>(31.29-34.32)                                                              | 31.54<br>(30.19-32.98) | 33.21<br>(31.23-35.74) |
| Chile          | 98.90<br>(98.58-99.18)                                                                                                                                              | 99.17<br>(98.92-99.40) | 99.34<br>(99.14-99.54) | 57.93<br>(55.09-61.93)                                                                                   | 68.65<br>(65.78-72.13) | 75.02<br>(72.19-77.66) | 57.30<br>(54.67-59.98)                                                                                                 | 71.67<br>(69.27-74.18) | 77.15<br>(74.97-78.90) | 38.77<br>(33.03-41.61)                                                              | 36.54<br>(34.22-38.42) | 41.06<br>(39.11-42.85) |
| Uruguay        | 99.03<br>(98.74-99.30)                                                                                                                                              | 99.19<br>(98.94-99.42) | 99.31<br>(99.09-99.53) | 54.07<br>(51.30-58.40)                                                                                   | 61.18<br>(58.31-65.22) | 70.92<br>(65.80-74.93) | 52.73<br>(49.84-55.53)                                                                                                 | 61.42<br>(58.57-64.34) | 73.10<br>(68.10-76.42) | 42.86<br>(30.81-48.75)                                                              | 37.43<br>(32.94-40.77) | 40.01<br>(36.25-43.92) |

**Appendix Table 1a. Scaled values for each SDG health-related indicator and three summary indicators by country for 1990, 2000, and 2015**

| Location               | Indicator 3.1.2: Proportion of births attended by skilled health personnel (doctors, nurses, midwives, or country-specific medical staff [e.g., clinical officers]) |                        |                        | Indicator 3.2.1: Under-5 mortality rate (probability of dying before the age of 5 per 1,000 live births) |                        |                        | Indicator 3.2.2: Neonatal mortality rate (probability of dying during the first 28 days of life per 1,000 live births) |                        |                        | Indicator 3.3.1: Age-standardised rate of new HIV infections (per 1,000 population) |                        |                        |
|------------------------|---------------------------------------------------------------------------------------------------------------------------------------------------------------------|------------------------|------------------------|----------------------------------------------------------------------------------------------------------|------------------------|------------------------|------------------------------------------------------------------------------------------------------------------------|------------------------|------------------------|-------------------------------------------------------------------------------------|------------------------|------------------------|
|                        | 1990                                                                                                                                                                | 2000                   | 2015                   | 1990                                                                                                     | 2000                   | 2015                   | 1990                                                                                                                   | 2000                   | 2015                   | 1990                                                                                | 2000                   | 2015                   |
| Belarus                | 99.24<br>(99.08-99.40)                                                                                                                                              | 99.09<br>(98.91-99.26) | 99.48<br>(99.34-99.61) | 56.21<br>(52.62-60.73)                                                                                   | 61.81<br>(58.14-66.14) | 80.42<br>(75.98-83.04) | 55.54<br>(50.96-60.51)                                                                                                 | 62.29<br>(57.27-67.53) | 82.77<br>(77.14-86.77) | 55.92<br>(46.97-63.53)                                                              | 40.71<br>(35.64-44.95) | 39.67<br>(35.42-43.68) |
| Estonia                | 99.20<br>(99.03-99.35)                                                                                                                                              | 99.20<br>(99.05-99.36) | 99.54<br>(99.41-99.67) | 59.41<br>(56.30-63.37)                                                                                   | 67.06<br>(63.79-70.95) | 90.19<br>(85.53-95.28) | 59.91<br>(56.70-63.44)                                                                                                 | 70.15<br>(66.75-73.58) | 93.74<br>(89.07-98.17) | 60.54<br>(58.28-62.57)                                                              | 41.99<br>(38.35-45.10) | 41.11<br>(37.64-44.20) |
| Latvia                 | 99.28<br>(99.12-99.43)                                                                                                                                              | 99.17<br>(99.00-99.32) | 99.54<br>(99.41-99.68) | 58.86<br>(55.99-63.03)                                                                                   | 64.68<br>(61.21-68.47) | 82.27<br>(76.38-88.75) | 58.67<br>(55.57-62.00)                                                                                                 | 66.46<br>(62.89-69.93) | 85.08<br>(78.49-91.90) | 44.87<br>(39.94-51.01)                                                              | 37.46<br>(33.83-40.01) | 41.94<br>(37.36-47.08) |
| Lithuania              | 99.26<br>(99.10-99.41)                                                                                                                                              | 99.17<br>(99.00-99.33) | 99.54<br>(99.40-99.67) | 63.58<br>(60.63-67.45)                                                                                   | 67.97<br>(64.95-71.55) | 86.37<br>(83.88-87.90) | 66.52<br>(63.37-70.02)                                                                                                 | 71.91<br>(69.09-75.13) | 90.58<br>(86.99-92.67) | 53.09<br>(48.66-63.07)                                                              | 46.62<br>(42.98-49.22) | 51.15<br>(46.27-57.47) |
| Moldova                | 99.35<br>(99.20-99.49)                                                                                                                                              | 99.09<br>(98.91-99.25) | 99.44<br>(99.29-99.58) | 48.83<br>(44.54-54.31)                                                                                   | 47.76<br>(43.44-53.38) | 69.08<br>(61.61-76.29) | 47.35<br>(43.02-52.28)                                                                                                 | 45.43<br>(40.85-50.21) | 71.21<br>(62.25-78.79) | 47.09<br>(36.61-54.15)                                                              | 39.52<br>(36.10-42.36) | 40.44<br>(36.21-44.16) |
| Russia                 | 99.30<br>(99.14-99.44)                                                                                                                                              | 99.17<br>(99.01-99.34) | 99.49<br>(99.36-99.62) | 55.81<br>(53.04-59.88)                                                                                   | 57.11<br>(54.31-61.09) | 72.43<br>(69.57-75.65) | 54.97<br>(52.08-57.93)                                                                                                 | 56.46<br>(53.65-59.40) | 74.88<br>(72.33-77.40) | 44.83<br>(39.95-53.40)                                                              | 33.70<br>(30.08-36.55) | 31.57<br>(27.18-35.25) |
| Ukraine                | 99.39<br>(99.24-99.53)                                                                                                                                              | 99.15<br>(98.97-99.30) | 99.39<br>(99.23-99.53) | 55.47<br>(51.03-60.86)                                                                                   | 55.52<br>(50.59-60.93) | 71.13<br>(63.49-79.25) | 54.66<br>(49.62-60.28)                                                                                                 | 53.76<br>(47.97-59.77) | 73.32<br>(63.89-82.50) | 41.22<br>(36.33-44.37)                                                              | 28.24<br>(25.11-30.54) | 31.07<br>(29.01-33.05) |
| Albania                | 98.24<br>(97.93-98.52)                                                                                                                                              | 98.30<br>(97.99-98.56) | 99.08<br>(98.89-99.26) | 42.50<br>(38.96-47.72)                                                                                   | 51.17<br>(47.19-55.95) | 66.59<br>(60.04-72.06) | 59.53<br>(56.25-62.85)                                                                                                 | 64.75<br>(61.08-68.63) | 80.67<br>(72.93-85.39) | 75.11<br>(69.80-80.34)                                                              | 72.17<br>(68.22-75.37) | 72.37<br>(68.46-76.86) |
| Bosnia and Herzegovina | 97.96<br>(97.62-98.30)                                                                                                                                              | 99.06<br>(98.86-99.23) | 99.37<br>(99.20-99.53) | 58.52<br>(55.69-62.51)                                                                                   | 68.42<br>(65.38-72.23) | 81.34<br>(77.61-84.98) | 57.24<br>(54.28-60.28)                                                                                                 | 70.07<br>(67.30-72.83) | 82.78<br>(79.26-86.45) | 77.02<br>(66.93-90.42)                                                              | 72.25<br>(68.81-74.72) | 73.68<br>(69.99-77.43) |
| Bulgaria               | 99.21<br>(99.05-99.39)                                                                                                                                              | 99.14<br>(98.95-99.32) | 99.43<br>(99.26-99.57) | 58.59<br>(55.73-62.62)                                                                                   | 59.16<br>(56.23-63.14) | 72.75<br>(66.49-77.68) | 59.64<br>(56.66-62.52)                                                                                                 | 59.91<br>(56.89-62.93) | 76.10<br>(70.27-80.94) | 63.14<br>(54.83-85.39)                                                              | 57.04<br>(52.00-60.94) | 58.53<br>(51.83-65.77) |
| Croatia                | 99.24<br>(99.05-99.40)                                                                                                                                              | 99.18<br>(99.00-99.34) | 99.37<br>(99.20-99.51) | 66.43<br>(63.54-70.17)                                                                                   | 72.70<br>(69.66-76.22) | 84.95<br>(81.45-88.40) | 64.14<br>(61.17-67.16)                                                                                                 | 70.81<br>(68.03-73.66) | 83.92<br>(80.53-87.29) | 60.34<br>(57.31-62.87)                                                              | 61.01<br>(59.03-62.82) | 68.53<br>(65.32-73.24) |

**Appendix Table 1a. Scaled values for each SDG health-related indicator and three summary indicators by country for 1990, 2000, and 2015**

| Location       | Indicator 3.1.2: Proportion of births attended by skilled health personnel (doctors, nurses, midwives, or country-specific medical staff [e.g., clinical officers]) |                        |                        | Indicator 3.2.1: Under-5 mortality rate (probability of dying before the age of 5 per 1,000 live births) |                        |                        | Indicator 3.2.2: Neonatal mortality rate (probability of dying during the first 28 days of life per 1,000 live births) |                        |                        | Indicator 3.3.1: Age-standardised rate of new HIV infections (per 1,000 population) |                        |                        |
|----------------|---------------------------------------------------------------------------------------------------------------------------------------------------------------------|------------------------|------------------------|----------------------------------------------------------------------------------------------------------|------------------------|------------------------|------------------------------------------------------------------------------------------------------------------------|------------------------|------------------------|-------------------------------------------------------------------------------------|------------------------|------------------------|
|                | 1990                                                                                                                                                                | 2000                   | 2015                   | 1990                                                                                                     | 2000                   | 2015                   | 1990                                                                                                                   | 2000                   | 2015                   | 1990                                                                                | 2000                   | 2015                   |
| Czech Republic | 99.21<br>(99.03-99.39)                                                                                                                                              | 99.21<br>(99.04-99.38) | 99.37<br>(99.22-99.52) | 66.61<br>(63.75-70.33)                                                                                   | 81.43<br>(78.36-84.58) | 94.98<br>(91.08-96.60) | 67.12<br>(64.26-69.99)                                                                                                 | 82.74<br>(79.90-85.41) | 96.08<br>(93.45-97.23) | 67.53<br>(65.02-69.93)                                                              | 68.48<br>(65.72-71.09) | 69.18<br>(65.39-74.17) |
| Hungary        | 99.19<br>(99.02-99.36)                                                                                                                                              | 99.19<br>(99.01-99.37) | 99.37<br>(99.20-99.52) | 59.98<br>(57.03-63.88)                                                                                   | 69.20<br>(66.28-72.71) | 83.12<br>(76.77-87.64) | 54.79<br>(51.77-57.72)                                                                                                 | 67.34<br>(64.51-70.22) | 82.06<br>(75.66-86.97) | 53.09<br>(51.57-54.60)                                                              | 56.72<br>(55.14-58.28) | 65.82<br>(63.18-68.62) |
| Macedonia      | 95.16<br>(94.47-95.83)                                                                                                                                              | 97.96<br>(97.63-98.30) | 98.96<br>(98.75-99.16) | 45.98<br>(43.13-50.85)                                                                                   | 61.83<br>(58.73-65.75) | 71.13<br>(63.15-78.50) | 39.03<br>(36.32-41.74)                                                                                                 | 58.54<br>(55.32-61.76) | 69.75<br>(60.68-78.00) | 76.60<br>(71.75-82.00)                                                              | 72.75<br>(68.11-76.75) | 73.25<br>(66.58-81.89) |
| Montenegro     | 99.21<br>(99.03-99.38)                                                                                                                                              | 99.07<br>(98.90-99.26) | 99.35<br>(99.19-99.51) | 57.90<br>(51.87-64.57)                                                                                   | 56.75<br>(53.32-61.38) | 82.20<br>(75.74-88.08) | 54.82<br>(47.52-63.31)                                                                                                 | 52.60<br>(48.87-56.53) | 82.86<br>(75.99-89.23) | 75.33<br>(66.65-94.69)                                                              | 71.36<br>(64.40-78.67) | 70.94<br>(62.12-85.67) |
| Poland         | 99.14<br>(98.96-99.32)                                                                                                                                              | 99.23<br>(99.06-99.39) | 99.49<br>(99.35-99.63) | 59.06<br>(56.24-62.98)                                                                                   | 71.16<br>(68.18-74.53) | 84.80<br>(78.32-89.34) | 53.94<br>(51.20-56.70)                                                                                                 | 69.71<br>(67.04-72.42) | 84.24<br>(77.91-88.98) | 58.03<br>(55.18-60.63)                                                              | 58.97<br>(55.89-61.98) | 60.87<br>(57.23-66.40) |
| Romania        | 99.11<br>(98.92-99.30)                                                                                                                                              | 98.82<br>(98.59-99.04) | 99.14<br>(98.94-99.32) | 46.94<br>(44.39-51.73)                                                                                   | 53.99<br>(51.16-58.19) | 73.49<br>(68.13-77.50) | 49.52<br>(46.78-52.24)                                                                                                 | 55.96<br>(53.26-58.71) | 78.83<br>(74.27-82.40) | 55.70<br>(52.81-58.00)                                                              | 50.34<br>(48.31-52.24) | 51.78<br>(48.67-56.45) |
| Serbia         | 99.04<br>(98.84-99.22)                                                                                                                                              | 98.90<br>(98.68-99.09) | 99.23<br>(99.06-99.40) | 53.31<br>(50.18-57.46)                                                                                   | 65.25<br>(61.97-69.05) | 74.77<br>(71.26-78.46) | 50.21<br>(46.80-53.69)                                                                                                 | 66.07<br>(62.68-69.47) | 75.50<br>(72.20-78.46) | 58.95<br>(56.36-62.28)                                                              | 57.54<br>(47.24-61.39) | 57.43<br>(54.86-59.58) |
| Slovakia       | 99.20<br>(99.01-99.37)                                                                                                                                              | 99.20<br>(99.00-99.37) | 99.45<br>(99.30-99.59) | 63.40<br>(60.32-67.19)                                                                                   | 70.54<br>(67.49-74.09) | 79.46<br>(75.52-82.09) | 64.79<br>(61.75-67.90)                                                                                                 | 73.18<br>(70.53-76.01) | 81.61<br>(78.06-83.88) | 79.10<br>(68.07-98.66)                                                              | 80.23<br>(75.45-84.74) | 77.73<br>(72.16-83.49) |
| Slovenia       | 99.22<br>(99.02-99.38)                                                                                                                                              | 99.21<br>(99.02-99.38) | 99.36<br>(99.20-99.52) | 69.85<br>(66.60-73.54)                                                                                   | 81.28<br>(78.23-84.66) | 93.94<br>(90.19-97.52) | 69.83<br>(66.80-73.01)                                                                                                 | 81.71<br>(78.69-84.67) | 94.25<br>(91.31-97.13) | 65.31<br>(58.45-73.21)                                                              | 69.78<br>(65.87-73.43) | 74.00<br>(69.11-78.82) |
| Armenia        | 97.43<br>(95.74-98.58)                                                                                                                                              | 97.98<br>(97.22-98.62) | 99.53<br>(99.08-99.86) | 39.77<br>(36.77-45.13)                                                                                   | 48.15<br>(44.52-52.89) | 62.54<br>(58.32-67.04) | 38.65<br>(35.09-42.49)                                                                                                 | 46.16<br>(42.33-49.95) | 63.27<br>(56.93-69.81) | 80.93<br>(70.29-86.15)                                                              | 60.60<br>(53.43-65.79) | 52.40<br>(48.29-56.20) |
| Azerbaijan     | 91.74<br>(86.96-94.93)                                                                                                                                              | 88.38<br>(86.74-89.93) | 94.91<br>(92.14-96.95) | 28.70<br>(25.68-34.30)                                                                                   | 33.38<br>(30.20-39.13) | 49.21<br>(44.96-53.79) | 26.28<br>(22.49-30.01)                                                                                                 | 30.30<br>(26.56-33.99) | 45.76<br>(40.93-50.97) | 57.65<br>(46.81-68.39)                                                              | 49.31<br>(43.44-53.58) | 50.23<br>(46.36-54.78) |

**Appendix Table 1a. Scaled values for each SDG health-related indicator and three summary indicators by country for 1990, 2000, and 2015**

| Location     | Indicator 3.1.2: Proportion of births attended by skilled health personnel (doctors, nurses, midwives, or country-specific medical staff [e.g., clinical officers]) |                        |                         | Indicator 3.2.1: Under-5 mortality rate (probability of dying before the age of 5 per 1,000 live births) |                        |                        | Indicator 3.2.2: Neonatal mortality rate (probability of dying during the first 28 days of life per 1,000 live births) |                        |                        | Indicator 3.3.1: Age-standardised rate of new HIV infections (per 1,000 population) |                        |                        |
|--------------|---------------------------------------------------------------------------------------------------------------------------------------------------------------------|------------------------|-------------------------|----------------------------------------------------------------------------------------------------------|------------------------|------------------------|------------------------------------------------------------------------------------------------------------------------|------------------------|------------------------|-------------------------------------------------------------------------------------|------------------------|------------------------|
|              | 1990                                                                                                                                                                | 2000                   | 2015                    | 1990                                                                                                     | 2000                   | 2015                   | 1990                                                                                                                   | 2000                   | 2015                   | 1990                                                                                | 2000                   | 2015                   |
| Georgia      | 97.51<br>(95.92-98.53)                                                                                                                                              | 97.73<br>(97.07-98.28) | 99.43<br>(99.09-99.70)  | 42.46<br>(39.29-47.46)                                                                                   | 45.14<br>(42.14-50.08) | 59.62<br>(55.75-63.79) | 40.28<br>(36.87-43.51)                                                                                                 | 42.14<br>(38.72-45.55) | 58.56<br>(53.30-64.54) | 70.78<br>(59.82-77.53)                                                              | 60.06<br>(57.89-62.39) | 49.05<br>(45.29-52.60) |
| Kazakhstan   | 99.10<br>(98.50-99.55)                                                                                                                                              | 99.09<br>(98.64-99.44) | 99.57<br>(99.17-99.88)  | 43.58<br>(40.47-48.75)                                                                                   | 45.39<br>(41.96-50.45) | 59.72<br>(55.50-64.24) | 42.60<br>(39.20-46.15)                                                                                                 | 43.53<br>(39.83-47.27) | 59.58<br>(53.60-66.15) | 48.88<br>(43.46-52.60)                                                              | 41.03<br>(37.10-44.12) | 42.43<br>(38.69-46.32) |
| Kyrgyzstan   | 98.69<br>(97.69-99.32)                                                                                                                                              | 98.46<br>(97.60-99.08) | 99.25<br>(98.65-99.66)  | 33.22<br>(30.84-38.63)                                                                                   | 38.77<br>(36.37-44.11) | 49.59<br>(46.91-53.10) | 27.49<br>(24.67-30.75)                                                                                                 | 32.74<br>(29.89-35.97) | 43.78<br>(40.80-46.93) | 51.60<br>(44.28-57.80)                                                              | 43.03<br>(37.95-47.45) | 45.84<br>(41.02-49.89) |
| Mongolia     | 96.85<br>(95.36-98.00)                                                                                                                                              | 98.39<br>(97.94-98.77) | 99.55<br>(99.16-99.87)  | 26.62<br>(24.14-32.63)                                                                                   | 35.07<br>(32.23-40.98) | 50.24<br>(46.17-54.55) | 27.45<br>(23.98-31.34)                                                                                                 | 34.57<br>(31.06-38.19) | 48.40<br>(43.45-52.55) | 72.75<br>(58.04-86.83)                                                              | 69.70<br>(65.55-72.84) | 72.70<br>(67.60-77.12) |
| Tajikistan   | 92.28<br>(87.24-95.68)                                                                                                                                              | 90.37<br>(86.27-93.52) | 93.87<br>(91.11-96.18)  | 26.26<br>(23.50-32.43)                                                                                   | 31.66<br>(28.77-37.75) | 47.17<br>(42.53-52.69) | 28.21<br>(24.33-32.19)                                                                                                 | 32.74<br>(29.14-36.31) | 46.52<br>(41.45-51.30) | 57.42<br>(47.19-71.38)                                                              | 44.43<br>(39.02-48.32) | 50.16<br>(44.66-55.28) |
| Turkmenistan | 96.23<br>(93.82-98.01)                                                                                                                                              | 97.14<br>(95.50-98.33) | 99.25<br>(98.46-99.76)  | 25.63<br>(22.09-32.21)                                                                                   | 29.81<br>(25.07-36.08) | 43.54<br>(38.55-48.68) | 24.83<br>(19.92-29.57)                                                                                                 | 27.88<br>(22.06-33.15) | 40.52<br>(34.80-46.44) | 61.81<br>(59.90-63.63)                                                              | 35.73<br>(30.49-40.02) | 36.57<br>(30.69-42.22) |
| Uzbekistan   | 97.91<br>(96.72-98.79)                                                                                                                                              | 98.35<br>(97.51-99.02) | 99.55<br>(99.06-99.91)  | 38.79<br>(35.73-44.39)                                                                                   | 41.76<br>(37.99-47.34) | 53.24<br>(48.93-57.80) | 38.20<br>(34.51-41.78)                                                                                                 | 40.22<br>(36.19-44.39) | 51.43<br>(46.16-57.25) | 55.25<br>(43.77-68.01)                                                              | 44.49<br>(39.16-48.81) | 57.55<br>(52.84-61.45) |
| Colombia     | 81.45<br>(79.58-83.33)                                                                                                                                              | 87.93<br>(86.62-89.17) | 97.38<br>(95.99-98.39)  | 47.53<br>(44.58-52.08)                                                                                   | 53.37<br>(50.34-58.04) | 61.51<br>(55.97-66.24) | 51.42<br>(48.36-54.55)                                                                                                 | 56.43<br>(53.05-59.88) | 65.40<br>(58.37-71.81) | 42.69<br>(37.73-46.18)                                                              | 40.13<br>(37.29-42.27) | 39.58<br>(35.97-43.35) |
| Costa Rica   | 98.69<br>(97.79-99.32)                                                                                                                                              | 98.44<br>(96.92-99.37) | 99.51<br>(98.86-99.95)  | 56.60<br>(53.36-60.84)                                                                                   | 61.57<br>(58.65-65.23) | 70.64<br>(64.74-75.26) | 54.84<br>(50.85-58.83)                                                                                                 | 61.43<br>(56.46-65.68) | 72.08<br>(65.79-76.53) | 43.71<br>(40.55-46.59)                                                              | 41.38<br>(38.33-44.46) | 44.73<br>(41.84-48.00) |
| El Salvador  | 97.66<br>(96.68-98.47)                                                                                                                                              | 99.28<br>(98.88-99.62) | 99.81<br>(99.38-100.00) | 37.48<br>(34.34-42.67)                                                                                   | 49.46<br>(45.65-54.22) | 67.98<br>(61.68-73.14) | 39.82<br>(35.88-43.94)                                                                                                 | 50.27<br>(46.26-54.51) | 72.23<br>(64.37-77.19) | 39.85<br>(36.01-42.92)                                                              | 34.14<br>(30.81-37.18) | 39.42<br>(36.09-42.96) |
| Guatemala    | 27.84<br>(24.31-30.98)                                                                                                                                              | 42.81<br>(39.56-46.22) | 63.81<br>(50.77-75.85)  | 28.69<br>(26.53-34.76)                                                                                   | 38.07<br>(35.87-43.33) | 51.78<br>(47.60-56.17) | 43.66<br>(40.09-47.57)                                                                                                 | 50.12<br>(47.07-53.56) | 59.99<br>(56.01-63.20) | 33.43<br>(31.32-35.17)                                                              | 32.10<br>(28.61-35.14) | 39.11<br>(35.06-42.75) |

**Appendix Table 1a. Scaled values for each SDG health-related indicator and three summary indicators by country for 1990, 2000, and 2015**

| Location            | Indicator 3.1.2: Proportion of births attended by skilled health personnel (doctors, nurses, midwives, or country-specific medical staff [e.g., clinical officers]) |                        |                        | Indicator 3.2.1: Under-5 mortality rate (probability of dying before the age of 5 per 1,000 live births) |                        |                        | Indicator 3.2.2: Neonatal mortality rate (probability of dying during the first 28 days of life per 1,000 live births) |                        |                        | Indicator 3.3.1: Age-standardised rate of new HIV infections (per 1,000 population) |                        |                        |
|---------------------|---------------------------------------------------------------------------------------------------------------------------------------------------------------------|------------------------|------------------------|----------------------------------------------------------------------------------------------------------|------------------------|------------------------|------------------------------------------------------------------------------------------------------------------------|------------------------|------------------------|-------------------------------------------------------------------------------------|------------------------|------------------------|
|                     | 1990                                                                                                                                                                | 2000                   | 2015                   | 1990                                                                                                     | 2000                   | 2015                   | 1990                                                                                                                   | 2000                   | 2015                   | 1990                                                                                | 2000                   | 2015                   |
| Honduras            | 44.04<br>(34.67-52.77)                                                                                                                                              | 66.22<br>(58.32-73.20) | 96.91<br>(94.93-98.27) | 36.84<br>(34.46-42.15)                                                                                   | 45.09<br>(42.45-49.81) | 54.81<br>(51.92-58.76) | 37.29<br>(34.40-40.44)                                                                                                 | 44.48<br>(41.61-47.47) | 53.87<br>(49.51-57.34) | 35.01<br>(32.66-37.00)                                                              | 35.20<br>(33.27-37.78) | 36.30<br>(33.14-39.71) |
| Mexico              | 78.81<br>(74.04-83.13)                                                                                                                                              | 91.03<br>(89.25-92.65) | 97.90<br>(95.76-99.17) | 41.68<br>(39.02-46.49)                                                                                   | 51.04<br>(48.16-54.99) | 62.01<br>(56.77-66.44) | 39.90<br>(36.67-43.41)                                                                                                 | 48.83<br>(45.55-52.38) | 61.86<br>(55.18-67.90) | 39.74<br>(38.21-41.25)                                                              | 40.28<br>(38.95-41.70) | 41.16<br>(39.66-42.70) |
| Nicaragua           | 69.58<br>(60.59-77.74)                                                                                                                                              | 90.57<br>(87.51-93.17) | 96.91<br>(93.65-98.76) | 33.98<br>(31.71-39.57)                                                                                   | 45.49<br>(42.94-49.94) | 61.95<br>(57.72-65.84) | 34.84<br>(32.03-37.59)                                                                                                 | 45.27<br>(42.41-48.00) | 63.49<br>(58.47-67.74) | 54.98<br>(52.01-57.75)                                                              | 46.03<br>(43.03-48.59) | 39.23<br>(34.15-44.48) |
| Panama              | 85.58<br>(76.72-92.09)                                                                                                                                              | 90.11<br>(87.34-92.47) | 94.43<br>(90.67-96.98) | 50.72<br>(47.51-55.10)                                                                                   | 54.16<br>(51.70-57.85) | 59.49<br>(54.08-64.30) | 53.65<br>(50.02-57.54)                                                                                                 | 56.74<br>(53.26-60.03) | 62.36<br>(55.75-68.89) | 39.46<br>(34.36-43.30)                                                              | 29.72<br>(26.92-32.04) | 29.46<br>(25.48-33.23) |
| Venezuela           | 94.62<br>(90.67-97.31)                                                                                                                                              | 97.50<br>(96.02-98.67) | 98.13<br>(96.37-99.22) | 50.13<br>(47.48-54.62)                                                                                   | 55.76<br>(53.04-59.86) | 60.07<br>(57.32-63.69) | 49.37<br>(46.43-52.25)                                                                                                 | 55.09<br>(52.17-57.97) | 59.69<br>(56.96-61.90) | 42.10<br>(34.84-47.55)                                                              | 38.03<br>(34.80-40.37) | 39.48<br>(35.54-44.22) |
| Bolivia             | 41.44<br>(38.45-44.31)                                                                                                                                              | 60.53<br>(58.34-62.72) | 83.02<br>(77.90-87.18) | 22.00<br>(20.22-28.12)                                                                                   | 32.22<br>(30.08-37.78) | 49.36<br>(45.28-53.82) | 20.12<br>(16.66-23.81)                                                                                                 | 30.16<br>(27.05-33.41) | 46.56<br>(42.28-50.46) | 54.26<br>(50.85-57.16)                                                              | 48.21<br>(45.57-50.18) | 49.34<br>(46.82-51.68) |
| Ecuador             | 86.43<br>(82.86-89.65)                                                                                                                                              | 95.32<br>(93.31-96.81) | 98.29<br>(97.00-99.12) | 39.34<br>(36.84-44.71)                                                                                   | 46.62<br>(44.28-50.82) | 59.14<br>(55.61-62.82) | 49.25<br>(46.34-52.29)                                                                                                 | 54.21<br>(51.71-57.06) | 65.72<br>(61.88-68.76) | 40.24<br>(35.80-43.11)                                                              | 35.17<br>(32.85-36.94) | 35.76<br>(33.24-38.28) |
| Peru                | 62.44<br>(57.64-67.08)                                                                                                                                              | 65.20<br>(60.78-69.70) | 91.59<br>(89.24-93.82) | 29.57<br>(27.45-35.51)                                                                                   | 45.86<br>(43.25-50.64) | 61.38<br>(58.69-64.76) | 32.13<br>(28.86-35.58)                                                                                                 | 46.80<br>(43.74-49.85) | 63.84<br>(59.16-67.49) | 36.64<br>(35.25-38.16)                                                              | 38.25<br>(36.32-39.85) | 42.61<br>(40.11-44.94) |
| Antigua and Barbuda | 98.34<br>(97.24-99.13)                                                                                                                                              | 99.11<br>(98.50-99.57) | 99.55<br>(99.13-99.86) | 58.11<br>(53.32-62.94)                                                                                   | 58.09<br>(54.07-62.81) | 65.54<br>(58.83-71.30) | 55.95<br>(49.97-63.13)                                                                                                 | 55.29<br>(49.54-61.21) | 64.84<br>(55.63-71.64) | 35.53<br>(28.47-43.57)                                                              | 32.77<br>(27.43-36.87) | 36.31<br>(29.67-42.16) |
| The Bahamas         | 98.35<br>(97.25-99.15)                                                                                                                                              | 99.07<br>(98.45-99.54) | 99.43<br>(98.93-99.78) | 47.55<br>(40.40-55.12)                                                                                   | 58.63<br>(52.84-64.93) | 61.52<br>(50.84-69.84) | 36.42<br>(27.10-46.22)                                                                                                 | 50.92<br>(43.48-59.29) | 54.38<br>(38.81-66.64) | 24.36<br>(21.06-27.06)                                                              | 26.45<br>(24.79-28.07) | 33.83<br>(30.19-37.13) |
| Barbados            | 97.36<br>(95.75-98.57)                                                                                                                                              | 98.27<br>(97.21-98.99) | 99.49<br>(99.01-99.84) | 51.73<br>(44.75-59.07)                                                                                   | 56.17<br>(49.48-62.35) | 61.53<br>(51.44-70.22) | 43.80<br>(34.91-53.52)                                                                                                 | 49.06<br>(39.84-58.53) | 55.74<br>(42.00-67.62) | 33.63<br>(29.32-37.75)                                                              | 33.97<br>(31.12-36.51) | 35.91<br>(31.67-40.70) |

**Appendix Table 1a. Scaled values for each SDG health-related indicator and three summary indicators by country for 1990, 2000, and 2015**

| Location                         | Indicator 3.1.2: Proportion of births attended by skilled health personnel (doctors, nurses, midwives, or country-specific medical staff [e.g., clinical officers]) |                        |                        | Indicator 3.2.1: Under-5 mortality rate (probability of dying before the age of 5 per 1,000 live births) |                        |                        | Indicator 3.2.2: Neonatal mortality rate (probability of dying during the first 28 days of life per 1,000 live births) |                        |                        | Indicator 3.3.1: Age-standardised rate of new HIV infections (per 1,000 population) |                        |                        |
|----------------------------------|---------------------------------------------------------------------------------------------------------------------------------------------------------------------|------------------------|------------------------|----------------------------------------------------------------------------------------------------------|------------------------|------------------------|------------------------------------------------------------------------------------------------------------------------|------------------------|------------------------|-------------------------------------------------------------------------------------|------------------------|------------------------|
|                                  | 1990                                                                                                                                                                | 2000                   | 2015                   | 1990                                                                                                     | 2000                   | 2015                   | 1990                                                                                                                   | 2000                   | 2015                   | 1990                                                                                | 2000                   | 2015                   |
| Belize                           | 80.95<br>(78.88-83.07)                                                                                                                                              | 93.85<br>(91.68-95.60) | 97.63<br>(96.47-98.50) | 43.71<br>(39.36-49.05)                                                                                   | 51.89<br>(46.88-57.38) | 60.73<br>(52.55-67.21) | 40.43<br>(35.77-45.09)                                                                                                 | 48.98<br>(43.50-54.59) | 59.35<br>(47.71-69.29) | 38.98<br>(30.06-47.25)                                                              | 21.48<br>(17.66-24.89) | 27.73<br>(24.96-30.53) |
| Cuba                             | 98.78<br>(97.92-99.37)                                                                                                                                              | 98.98<br>(98.29-99.48) | 99.59<br>(99.17-99.88) | 64.07<br>(61.19-67.67)                                                                                   | 73.20<br>(70.27-76.49) | 79.10<br>(76.90-81.63) | 65.18<br>(62.35-67.97)                                                                                                 | 75.19<br>(72.56-77.75) | 80.84<br>(78.73-82.92) | 55.61<br>(49.73-60.64)                                                              | 48.40<br>(44.11-53.21) | 42.67<br>(38.69-46.48) |
| Dominica                         | 97.13<br>(95.35-98.39)                                                                                                                                              | 98.53<br>(97.66-99.21) | 99.42<br>(98.97-99.78) | 52.54<br>(47.63-57.94)                                                                                   | 53.30<br>(48.65-58.58) | 51.76<br>(43.88-58.93) | 49.17<br>(42.89-55.93)                                                                                                 | 49.39<br>(43.76-55.27) | 46.43<br>(37.13-56.07) | 38.90<br>(31.36-47.63)                                                              | 34.92<br>(29.62-38.61) | 37.41<br>(31.02-42.66) |
| Dominican Republic               | 94.19<br>(93.20-95.10)                                                                                                                                              | 98.62<br>(98.30-98.89) | 99.55<br>(99.24-99.80) | 35.05<br>(32.56-41.01)                                                                                   | 44.69<br>(41.77-49.59) | 52.53<br>(48.43-56.83) | 29.40<br>(26.28-32.59)                                                                                                 | 39.18<br>(35.81-42.59) | 47.06<br>(42.27-51.14) | 26.38<br>(24.53-28.62)                                                              | 23.80<br>(21.83-25.82) | 31.93<br>(29.69-34.17) |
| Grenada                          | 97.98<br>(96.59-98.91)                                                                                                                                              | 99.02<br>(98.34-99.49) | 99.55<br>(99.13-99.86) | 51.10<br>(42.60-60.06)                                                                                   | 56.65<br>(50.20-63.91) | 61.96<br>(51.38-71.14) | 47.63<br>(37.62-59.62)                                                                                                 | 53.77<br>(45.45-62.99) | 60.06<br>(46.15-72.10) | 38.79<br>(31.92-48.07)                                                              | 34.23<br>(27.72-38.33) | 37.15<br>(30.26-43.22) |
| Guyana                           | 84.53<br>(78.55-89.88)                                                                                                                                              | 89.52<br>(86.85-91.81) | 95.83<br>(94.16-97.18) | 37.80<br>(35.39-43.14)                                                                                   | 42.78<br>(40.26-47.43) | 50.37<br>(45.63-55.26) | 31.32<br>(28.13-34.68)                                                                                                 | 36.46<br>(33.22-39.53) | 44.13<br>(38.78-48.99) | 29.76<br>(23.46-35.92)                                                              | 17.07<br>(13.67-20.75) | 20.33<br>(17.19-23.69) |
| Haiti                            | 15.64<br>(12.02-19.30)                                                                                                                                              | 18.67<br>(15.89-21.58) | 42.49<br>(35.96-49.34) | 15.84<br>(13.62-22.96)                                                                                   | 25.16<br>(22.37-31.72) | 35.68<br>(29.38-42.39) | 15.63<br>(11.83-19.50)                                                                                                 | 26.06<br>(22.21-29.65) | 34.55<br>(27.77-40.60) | 15.35<br>(13.71-16.92)                                                              | 20.48<br>(18.33-23.18) | 24.65<br>(21.31-28.29) |
| Jamaica                          | 93.55<br>(91.91-94.87)                                                                                                                                              | 98.07<br>(97.38-98.62) | 99.42<br>(98.91-99.79) | 50.73<br>(45.05-56.83)                                                                                   | 55.17<br>(49.80-61.45) | 59.12<br>(51.17-66.29) | 47.00<br>(40.47-54.25)                                                                                                 | 51.75<br>(44.31-59.97) | 56.08<br>(45.66-66.20) | 33.30<br>(26.01-37.70)                                                              | 31.41<br>(28.83-33.44) | 35.25<br>(31.87-38.55) |
| Saint Lucia                      | 97.80<br>(96.42-98.86)                                                                                                                                              | 98.71<br>(97.89-99.29) | 99.46<br>(98.96-99.80) | 48.45<br>(41.04-56.32)                                                                                   | 57.00<br>(50.41-64.36) | 60.09<br>(48.72-70.03) | 45.02<br>(36.44-55.31)                                                                                                 | 54.71<br>(46.32-64.86) | 57.92<br>(43.14-71.27) | 39.12<br>(33.35-45.22)                                                              | 34.33<br>(29.33-37.21) | 39.37<br>(33.08-44.09) |
| Saint Vincent and the Grenadines | 97.73<br>(96.25-98.77)                                                                                                                                              | 98.86<br>(98.16-99.40) | 99.40<br>(98.89-99.74) | 43.53<br>(37.94-49.35)                                                                                   | 47.86<br>(42.84-53.92) | 55.48<br>(47.25-62.97) | 36.77<br>(29.72-43.92)                                                                                                 | 41.14<br>(35.28-47.18) | 49.74<br>(39.08-60.19) | 31.98<br>(25.30-41.35)                                                              | 27.08<br>(21.44-30.69) | 30.46<br>(24.02-36.05) |
| Suriname                         | 90.34<br>(85.30-94.17)                                                                                                                                              | 93.65<br>(90.38-96.10) | 98.25<br>(97.14-99.07) | 38.24<br>(35.50-43.17)                                                                                   | 40.96<br>(38.15-45.81) | 48.22<br>(44.05-52.74) | 32.89<br>(29.53-36.17)                                                                                                 | 35.02<br>(31.41-38.62) | 41.88<br>(36.76-46.29) | 32.39<br>(24.99-38.83)                                                              | 25.84<br>(23.10-28.37) | 30.87<br>(27.21-34.12) |

**Appendix Table 1a. Scaled values for each SDG health-related indicator and three summary indicators by country for 1990, 2000, and 2015**

| Location            | Indicator 3.1.2: Proportion of births attended by skilled health personnel (doctors, nurses, midwives, or country-specific medical staff [e.g., clinical officers]) |                        |                         | Indicator 3.2.1: Under-5 mortality rate (probability of dying before the age of 5 per 1,000 live births) |                        |                        | Indicator 3.2.2: Neonatal mortality rate (probability of dying during the first 28 days of life per 1,000 live births) |                        |                        | Indicator 3.3.1: Age-standardised rate of new HIV infections (per 1,000 population) |                        |                        |
|---------------------|---------------------------------------------------------------------------------------------------------------------------------------------------------------------|------------------------|-------------------------|----------------------------------------------------------------------------------------------------------|------------------------|------------------------|------------------------------------------------------------------------------------------------------------------------|------------------------|------------------------|-------------------------------------------------------------------------------------|------------------------|------------------------|
|                     | 1990                                                                                                                                                                | 2000                   | 2015                    | 1990                                                                                                     | 2000                   | 2015                   | 1990                                                                                                                   | 2000                   | 2015                   | 1990                                                                                | 2000                   | 2015                   |
| Trinidad and Tobago | 98.73<br>(98.05-99.24)                                                                                                                                              | 98.91<br>(98.10-99.46) | 99.63<br>(99.21-99.92)  | 50.13<br>(46.58-54.78)                                                                                   | 50.60<br>(47.74-54.59) | 58.05<br>(49.55-65.65) | 41.76<br>(37.39-45.99)                                                                                                 | 41.79<br>(36.99-45.80) | 50.97<br>(39.80-61.97) | 29.55<br>(25.53-32.87)                                                              | 27.26<br>(24.48-29.85) | 34.50<br>(31.22-37.45) |
| Brazil              | 84.18<br>(79.74-88.01)                                                                                                                                              | 97.35<br>(95.66-98.48) | 99.26<br>(98.06-99.87)  | 37.78<br>(34.91-43.18)                                                                                   | 48.10<br>(44.54-53.44) | 60.11<br>(55.42-64.37) | 35.99<br>(32.79-39.14)                                                                                                 | 45.73<br>(42.14-49.79) | 59.02<br>(53.40-64.00) | 34.62<br>(32.69-36.31)                                                              | 34.82<br>(33.21-36.35) | 36.01<br>(34.58-37.43) |
| Paraguay            | 67.07<br>(63.74-70.03)                                                                                                                                              | 78.62<br>(74.87-81.99) | 91.77<br>(84.85-96.20)  | 47.26<br>(44.43-52.15)                                                                                   | 50.17<br>(47.21-54.46) | 59.03<br>(54.47-63.26) | 45.07<br>(41.98-48.31)                                                                                                 | 47.54<br>(44.34-51.01) | 57.38<br>(51.87-62.27) | 46.35<br>(38.40-49.48)                                                              | 38.52<br>(35.82-41.07) | 35.28<br>(30.50-39.59) |
| China               | 63.05<br>(38.95-83.12)                                                                                                                                              | 80.99<br>(70.67-88.77) | 96.83<br>(92.87-98.97)  | 36.42<br>(31.86-43.12)                                                                                   | 44.38<br>(40.18-49.73) | 66.36<br>(60.45-72.62) | 36.02<br>(30.77-41.20)                                                                                                 | 42.91<br>(38.23-47.34) | 68.91<br>(60.42-76.01) | 65.56<br>(62.98-67.65)                                                              | 49.11<br>(47.19-50.97) | 46.36<br>(44.31-48.30) |
| North Korea         | 91.13<br>(76.49-97.72)                                                                                                                                              | 91.70<br>(79.21-97.91) | 94.55<br>(85.63-98.75)  | 37.52<br>(22.79-51.84)                                                                                   | 19.18<br>(0.00-42.65)  | 58.78<br>(45.23-72.11) | 35.68<br>(19.90-51.69)                                                                                                 | 42.47<br>(27.28-59.98) | 57.85<br>(41.83-74.85) | 65.81<br>(50.94-70.09)                                                              | 49.17<br>(40.09-53.02) | 45.94<br>(39.18-50.39) |
| Taiwan              | 96.57<br>(90.60-99.31)                                                                                                                                              | 98.28<br>(94.83-99.73) | 99.26<br>(97.57-100.00) | 72.46<br>(69.53-75.74)                                                                                   | 72.90<br>(69.86-76.27) | 78.10<br>(70.66-83.11) | 78.46<br>(75.63-81.38)                                                                                                 | 78.06<br>(75.26-81.04) | 82.56<br>(74.22-89.32) | 75.28<br>(69.58-78.72)                                                              | 58.19<br>(54.44-61.41) | 54.35<br>(49.71-58.77) |
| Cambodia            | 17.76<br>(11.85-24.05)                                                                                                                                              | 33.14<br>(28.88-37.08) | 80.69<br>(75.51-84.85)  | 20.76<br>(18.77-27.02)                                                                                   | 24.84<br>(22.78-31.06) | 48.03<br>(45.21-51.65) | 18.79<br>(15.68-22.06)                                                                                                 | 22.75<br>(19.87-25.85) | 45.69<br>(42.66-48.90) | 30.91<br>(23.14-35.25)                                                              | 26.87<br>(23.93-29.71) | 28.11<br>(24.08-32.04) |
| Indonesia           | 34.08<br>(32.20-35.99)                                                                                                                                              | 65.35<br>(64.10-66.61) | 89.66<br>(87.73-91.30)  | 27.82<br>(25.81-33.62)                                                                                   | 38.58<br>(36.26-43.65) | 53.55<br>(50.15-57.68) | 28.44<br>(25.23-31.73)                                                                                                 | 37.97<br>(35.07-40.89) | 52.00<br>(48.42-55.08) | 65.59<br>(57.26-68.00)                                                              | 41.98<br>(34.48-44.99) | 30.42<br>(26.51-33.13) |
| Laos                | 10.31<br>(4.76-16.50)                                                                                                                                               | 19.51<br>(15.59-23.68) | 46.87<br>(38.99-55.00)  | 11.09<br>(8.66-18.08)                                                                                    | 16.65<br>(14.09-23.38) | 35.01<br>(30.21-40.06) | 2.56<br>(0.00-7.06)                                                                                                    | 9.44<br>(5.52-13.65)   | 29.86<br>(23.84-35.40) | 63.30<br>(56.07-65.39)                                                              | 37.44<br>(29.11-40.85) | 33.89<br>(30.48-36.13) |
| Malaysia            | 92.77<br>(89.53-95.24)                                                                                                                                              | 96.99<br>(95.71-98.09) | 99.62<br>(99.26-99.88)  | 60.12<br>(57.28-64.14)                                                                                   | 71.34<br>(68.33-74.76) | 77.95<br>(74.14-80.61) | 62.59<br>(59.30-65.78)                                                                                                 | 76.16<br>(73.23-79.05) | 81.81<br>(78.39-84.22) | 37.70<br>(30.88-43.19)                                                              | 36.43<br>(34.59-38.02) | 40.15<br>(38.19-42.02) |
| Maldives            | 72.23<br>(63.44-80.52)                                                                                                                                              | 87.67<br>(82.75-91.45) | 98.89<br>(98.28-99.41)  | 32.59<br>(30.18-38.14)                                                                                   | 45.33<br>(42.79-50.07) | 65.96<br>(62.95-69.03) | 32.54<br>(29.22-35.83)                                                                                                 | 44.35<br>(41.25-47.57) | 69.26<br>(64.10-72.80) | 66.71<br>(63.31-69.02)                                                              | 69.04<br>(65.72-71.70) | 72.11<br>(68.37-75.29) |

**Appendix Table 1a. Scaled values for each SDG health-related indicator and three summary indicators by country for 1990, 2000, and 2015**

| Location                       | Indicator 3.1.2: Proportion of births attended by skilled health personnel (doctors, nurses, midwives, or country-specific medical staff [e.g., clinical officers]) |                        |                         | Indicator 3.2.1: Under-5 mortality rate (probability of dying before the age of 5 per 1,000 live births) |                        |                        | Indicator 3.2.2: Neonatal mortality rate (probability of dying during the first 28 days of life per 1,000 live births) |                        |                        | Indicator 3.3.1: Age-standardised rate of new HIV infections (per 1,000 population) |                        |                        |
|--------------------------------|---------------------------------------------------------------------------------------------------------------------------------------------------------------------|------------------------|-------------------------|----------------------------------------------------------------------------------------------------------|------------------------|------------------------|------------------------------------------------------------------------------------------------------------------------|------------------------|------------------------|-------------------------------------------------------------------------------------|------------------------|------------------------|
|                                | 1990                                                                                                                                                                | 2000                   | 2015                    | 1990                                                                                                     | 2000                   | 2015                   | 1990                                                                                                                   | 2000                   | 2015                   | 1990                                                                                | 2000                   | 2015                   |
| Mauritius                      | 96.81<br>(95.16-98.06)                                                                                                                                              | 98.81<br>(98.11-99.33) | 99.84<br>(99.61-100.00) | 54.61<br>(51.89-58.71)                                                                                   | 58.98<br>(56.34-62.63) | 64.45<br>(61.47-67.83) | 50.61<br>(47.77-53.40)                                                                                                 | 55.75<br>(53.05-58.42) | 62.74<br>(59.88-65.08) | 53.62<br>(50.87-55.85)                                                              | 43.92<br>(40.98-46.20) | 41.34<br>(38.14-43.96) |
| Myanmar                        | 48.65<br>(38.42-59.14)                                                                                                                                              | 66.54<br>(60.58-71.91) | 85.82<br>(81.03-89.87)  | 22.25<br>(18.36-28.80)                                                                                   | 29.41<br>(25.09-36.19) | 47.48<br>(42.31-52.21) | 20.78<br>(15.68-26.09)                                                                                                 | 27.65<br>(22.24-32.97) | 44.89<br>(39.14-49.91) | 29.87<br>(9.65-38.01)                                                               | 26.13<br>(18.35-29.45) | 31.28<br>(27.55-33.67) |
| Philippines                    | 48.29<br>(45.20-51.35)                                                                                                                                              | 58.23<br>(56.12-60.17) | 78.81<br>(75.58-81.89)  | 36.40<br>(34.16-41.86)                                                                                   | 45.01<br>(42.58-49.76) | 53.94<br>(50.85-57.97) | 39.48<br>(36.21-43.01)                                                                                                 | 46.70<br>(43.53-49.94) | 55.05<br>(51.66-58.15) | 45.42<br>(35.09-54.83)                                                              | 41.79<br>(36.66-46.22) | 33.81<br>(26.01-40.65) |
| Sri Lanka                      | 92.57<br>(90.80-94.21)                                                                                                                                              | 98.92<br>(98.37-99.33) | 99.94<br>(99.76-100.00) | 42.66<br>(40.25-47.71)                                                                                   | 60.62<br>(57.82-64.49) | 74.10<br>(68.98-77.97) | 38.10<br>(35.03-41.32)                                                                                                 | 59.97<br>(56.75-63.15) | 75.10<br>(70.24-79.12) | 60.88<br>(52.89-64.55)                                                              | 61.14<br>(54.81-64.10) | 61.31<br>(56.59-65.93) |
| Seychelles                     | 81.36<br>(73.16-87.48)                                                                                                                                              | 92.90<br>(89.12-95.61) | 98.05<br>(96.97-98.90)  | 59.25<br>(56.51-62.88)                                                                                   | 64.47<br>(61.68-67.75) | 68.89<br>(64.45-72.40) | 60.30<br>(56.85-64.11)                                                                                                 | 67.09<br>(63.79-70.44) | 71.50<br>(66.69-74.64) | 100.00<br>(100.00-100.00)                                                           | 40.89<br>(34.07-45.89) | 40.97<br>(32.18-49.61) |
| Thailand                       | 75.60<br>(71.46-79.46)                                                                                                                                              | 96.44<br>(95.35-97.38) | 99.33<br>(99.01-99.63)  | 50.46<br>(48.05-54.44)                                                                                   | 62.31<br>(60.09-65.65) | 80.59<br>(76.11-83.38) | 43.90<br>(40.66-46.90)                                                                                                 | 59.34<br>(55.51-62.39) | 80.24<br>(75.98-83.21) | 24.90<br>(20.90-28.24)                                                              | 31.72<br>(28.03-34.80) | 34.11<br>(30.32-37.46) |
| Timor-Leste                    | 5.39<br>(0.50-10.60)                                                                                                                                                | 15.05<br>(10.19-20.55) | 49.26<br>(39.79-57.90)  | 15.41<br>(12.84-22.15)                                                                                   | 22.63<br>(19.47-28.76) | 44.34<br>(36.25-52.52) | 18.56<br>(14.60-22.47)                                                                                                 | 26.12<br>(21.87-30.20) | 45.04<br>(37.27-53.53) | 55.38<br>(16.41-69.10)                                                              | 44.81<br>(26.16-56.06) | 44.41<br>(30.91-55.26) |
| Vietnam                        | 64.73<br>(57.16-72.35)                                                                                                                                              | 82.15<br>(79.17-84.76) | 94.83<br>(92.92-96.44)  | 39.57<br>(37.08-44.67)                                                                                   | 50.30<br>(47.89-54.68) | 64.46<br>(61.87-67.60) | 37.47<br>(34.53-40.56)                                                                                                 | 47.91<br>(44.95-50.85) | 65.63<br>(61.14-68.89) | 65.48<br>(48.24-70.46)                                                              | 36.58<br>(24.37-42.80) | 37.35<br>(31.03-41.76) |
| Federated States of Micronesia | 86.45<br>(76.89-93.12)                                                                                                                                              | 92.91<br>(88.26-96.07) | 98.62<br>(97.09-99.56)  | 42.88<br>(37.80-48.90)                                                                                   | 53.67<br>(48.21-59.19) | 67.71<br>(60.66-73.76) | 46.80<br>(42.00-52.01)                                                                                                 | 56.32<br>(50.44-63.31) | 73.25<br>(64.22-79.30) | 45.33<br>(23.81-52.65)                                                              | 43.33<br>(30.89-48.82) | 40.80<br>(33.01-47.02) |
| Fiji                           | 97.89<br>(95.75-99.24)                                                                                                                                              | 98.70<br>(97.39-99.55) | 99.43<br>(98.73-99.87)  | 51.27<br>(45.10-56.89)                                                                                   | 49.82<br>(45.11-55.02) | 49.16<br>(39.84-57.74) | 56.85<br>(51.12-62.66)                                                                                                 | 54.61<br>(49.66-59.61) | 52.87<br>(44.53-61.71) | 53.21<br>(42.04-60.23)                                                              | 49.08<br>(44.90-52.92) | 43.98<br>(39.24-48.77) |
| Kiribati                       | 78.34<br>(64.60-88.48)                                                                                                                                              | 84.07<br>(74.08-90.66) | 91.68<br>(85.64-96.01)  | 27.92<br>(23.57-33.95)                                                                                   | 33.40<br>(29.45-39.69) | 44.38<br>(33.23-54.44) | 34.90<br>(29.98-39.62)                                                                                                 | 38.94<br>(34.73-43.50) | 47.22<br>(36.81-57.54) | 54.98<br>(44.36-60.58)                                                              | 55.17<br>(52.50-57.42) | 55.66<br>(50.01-61.90) |

**Appendix Table 1a. Scaled values for each SDG health-related indicator and three summary indicators by country for 1990, 2000, and 2015**

| Location         | Indicator 3.1.2: Proportion of births attended by skilled health personnel (doctors, nurses, midwives, or country-specific medical staff [e.g., clinical officers]) |                        |                        | Indicator 3.2.1: Under-5 mortality rate (probability of dying before the age of 5 per 1,000 live births) |                        |                        | Indicator 3.2.2: Neonatal mortality rate (probability of dying during the first 28 days of life per 1,000 live births) |                        |                        | Indicator 3.3.1: Age-standardised rate of new HIV infections (per 1,000 population) |                        |                        |
|------------------|---------------------------------------------------------------------------------------------------------------------------------------------------------------------|------------------------|------------------------|----------------------------------------------------------------------------------------------------------|------------------------|------------------------|------------------------------------------------------------------------------------------------------------------------|------------------------|------------------------|-------------------------------------------------------------------------------------|------------------------|------------------------|
|                  | 1990                                                                                                                                                                | 2000                   | 2015                   | 1990                                                                                                     | 2000                   | 2015                   | 1990                                                                                                                   | 2000                   | 2015                   | 1990                                                                                | 2000                   | 2015                   |
| Marshall Islands | 83.64<br>(73.01-91.16)                                                                                                                                              | 90.54<br>(85.53-94.54) | 95.48<br>(92.55-97.63) | 41.79<br>(35.34-49.00)                                                                                   | 44.10<br>(36.32-52.46) | 58.74<br>(49.50-68.45) | 47.36<br>(41.70-53.78)                                                                                                 | 48.26<br>(41.00-56.06) | 62.56<br>(51.33-75.65) | 54.89<br>(19.60-73.12)                                                              | 52.50<br>(28.73-65.88) | 44.88<br>(33.76-55.94) |
| Papua New Guinea | 55.12<br>(46.43-62.93)                                                                                                                                              | 52.08<br>(45.35-58.72) | 64.92<br>(50.49-78.01) | 26.12<br>(22.70-33.06)                                                                                   | 30.28<br>(25.19-35.54) | 41.54<br>(32.18-50.43) | 36.74<br>(32.76-41.49)                                                                                                 | 39.35<br>(34.30-43.78) | 47.30<br>(39.03-54.78) | 37.38<br>(32.60-42.21)                                                              | 31.38<br>(28.99-33.78) | 34.78<br>(32.25-37.23) |
| Samoa            | 83.96<br>(73.76-91.66)                                                                                                                                              | 90.87<br>(85.17-94.95) | 90.98<br>(84.76-95.43) | 57.04<br>(46.91-65.13)                                                                                   | 63.82<br>(54.19-73.63) | 73.60<br>(61.86-83.37) | 63.14<br>(51.12-75.58)                                                                                                 | 70.76<br>(57.37-81.91) | 80.74<br>(67.20-91.45) | 47.76<br>(24.03-56.60)                                                              | 45.63<br>(29.87-52.21) | 42.22<br>(33.01-49.91) |
| Solomon Islands  | 74.55<br>(60.24-84.91)                                                                                                                                              | 83.48<br>(76.61-89.33) | 95.08<br>(91.54-97.60) | 40.89<br>(36.22-46.96)                                                                                   | 46.67<br>(41.18-52.60) | 57.32<br>(50.49-63.52) | 48.57<br>(44.15-53.15)                                                                                                 | 52.21<br>(47.34-57.40) | 61.97<br>(54.12-70.46) | 41.72<br>(20.79-47.43)                                                              | 40.31<br>(29.28-44.35) | 40.58<br>(32.47-46.37) |
| Tonga            | 84.07<br>(74.50-91.27)                                                                                                                                              | 93.43<br>(90.99-95.44) | 98.88<br>(97.76-99.57) | 51.81<br>(44.87-59.30)                                                                                   | 53.01<br>(45.99-60.71) | 59.66<br>(50.43-67.70) | 55.34<br>(48.42-64.17)                                                                                                 | 55.92<br>(48.68-65.51) | 63.06<br>(51.75-74.31) | 65.51<br>(54.80-72.30)                                                              | 55.24<br>(51.15-58.89) | 44.33<br>(37.33-52.95) |
| Vanuatu          | 80.93<br>(68.86-89.39)                                                                                                                                              | 84.38<br>(77.41-89.97) | 90.73<br>(84.46-95.04) | 43.67<br>(38.62-50.34)                                                                                   | 43.96<br>(38.87-49.39) | 51.20<br>(44.08-57.06) | 49.86<br>(45.45-54.72)                                                                                                 | 49.11<br>(44.71-53.38) | 54.53<br>(47.22-61.35) | 41.14<br>(16.64-46.64)                                                              | 40.96<br>(30.27-45.20) | 41.03<br>(32.55-47.61) |
| Afghanistan      | 22.93<br>(15.59-30.74)                                                                                                                                              | 22.58<br>(16.09-28.97) | 39.62<br>(32.23-46.62) | 14.12<br>(12.19-21.40)                                                                                   | 18.14<br>(16.05-24.23) | 28.33<br>(24.94-32.85) | 11.98<br>(7.59-16.82)                                                                                                  | 16.97<br>(13.18-21.26) | 28.53<br>(24.13-33.26) | 64.93<br>(36.51-79.04)                                                              | 65.26<br>(49.91-73.94) | 56.82<br>(45.54-69.22) |
| Algeria          | 73.72<br>(65.35-80.64)                                                                                                                                              | 85.32<br>(80.27-89.66) | 94.44<br>(92.10-96.29) | 36.89<br>(34.11-42.26)                                                                                   | 44.91<br>(41.98-49.62) | 54.40<br>(50.06-58.52) | 34.29<br>(31.10-37.49)                                                                                                 | 41.86<br>(38.38-45.41) | 51.69<br>(45.81-56.57) | 61.21<br>(58.65-63.92)                                                              | 56.35<br>(53.93-58.96) | 56.77<br>(51.23-60.99) |
| Bahrain          | 91.23<br>(87.61-94.13)                                                                                                                                              | 96.77<br>(95.38-97.94) | 99.24<br>(98.79-99.60) | 55.66<br>(52.73-59.86)                                                                                   | 65.49<br>(62.19-69.44) | 77.63<br>(73.79-81.53) | 52.17<br>(48.99-55.29)                                                                                                 | 65.67<br>(62.29-69.17) | 77.89<br>(74.13-81.78) | 54.89<br>(46.79-60.93)                                                              | 53.07<br>(48.36-56.41) | 51.69<br>(44.80-59.88) |
| Egypt            | 36.66<br>(34.65-38.63)                                                                                                                                              | 64.89<br>(63.36-66.46) | 88.87<br>(86.34-91.04) | 28.39<br>(26.05-33.94)                                                                                   | 41.56<br>(38.61-46.69) | 55.52<br>(50.23-60.44) | 25.10<br>(22.00-28.31)                                                                                                 | 38.29<br>(35.06-41.61) | 52.91<br>(46.96-58.75) | 76.37<br>(71.40-79.87)                                                              | 71.96<br>(68.77-74.64) | 62.84<br>(57.26-68.30) |
| Iran             | 82.17<br>(76.36-87.25)                                                                                                                                              | 94.46<br>(92.33-96.22) | 98.71<br>(98.11-99.21) | 30.33<br>(26.70-36.26)                                                                                   | 43.74<br>(39.18-49.37) | 62.97<br>(57.98-68.32) | 27.75<br>(23.65-31.97)                                                                                                 | 39.85<br>(34.73-45.15) | 62.46<br>(55.33-69.91) | 55.61<br>(52.60-57.78)                                                              | 50.56<br>(47.83-52.87) | 46.11<br>(44.04-48.16) |

**Appendix Table 1a. Scaled values for each SDG health-related indicator and three summary indicators by country for 1990, 2000, and 2015**

| Location     | Indicator 3.1.2: Proportion of births attended by skilled health personnel (doctors, nurses, midwives, or country-specific medical staff [e.g., clinical officers]) |                        |                         | Indicator 3.2.1: Under-5 mortality rate (probability of dying before the age of 5 per 1,000 live births) |                        |                        | Indicator 3.2.2: Neonatal mortality rate (probability of dying during the first 28 days of life per 1,000 live births) |                        |                        | Indicator 3.3.1: Age-standardised rate of new HIV infections (per 1,000 population) |                        |                        |
|--------------|---------------------------------------------------------------------------------------------------------------------------------------------------------------------|------------------------|-------------------------|----------------------------------------------------------------------------------------------------------|------------------------|------------------------|------------------------------------------------------------------------------------------------------------------------|------------------------|------------------------|-------------------------------------------------------------------------------------|------------------------|------------------------|
|              | 1990                                                                                                                                                                | 2000                   | 2015                    | 1990                                                                                                     | 2000                   | 2015                   | 1990                                                                                                                   | 2000                   | 2015                   | 1990                                                                                | 2000                   | 2015                   |
| Iraq         | 52.65<br>(42.99-61.75)                                                                                                                                              | 66.20<br>(58.71-72.33) | 89.10<br>(85.91-91.79)  | 37.15<br>(34.79-42.52)                                                                                   | 41.96<br>(39.49-47.08) | 50.76<br>(47.73-54.83) | 31.63<br>(28.80-34.81)                                                                                                 | 36.01<br>(33.35-38.87) | 46.32<br>(42.25-49.63) | 81.75<br>(71.87-88.99)                                                              | 71.15<br>(65.09-76.15) | 60.95<br>(52.62-72.86) |
| Jordan       | 91.94<br>(90.77-93.05)                                                                                                                                              | 98.48<br>(98.19-98.74) | 99.59<br>(99.39-99.78)  | 47.36<br>(44.85-52.04)                                                                                   | 53.12<br>(50.29-57.50) | 62.65<br>(60.31-65.91) | 45.97<br>(42.89-49.10)                                                                                                 | 51.51<br>(48.28-54.65) | 63.38<br>(59.17-66.60) | 81.56<br>(72.80-89.94)                                                              | 75.01<br>(68.07-80.40) | 74.21<br>(65.34-86.76) |
| Kuwait       | 87.08<br>(82.68-90.57)                                                                                                                                              | 95.65<br>(94.21-96.89) | 99.04<br>(98.62-99.40)  | 60.99<br>(57.41-64.78)                                                                                   | 65.67<br>(62.54-69.74) | 73.80<br>(69.66-78.19) | 62.96<br>(59.05-66.58)                                                                                                 | 67.27<br>(64.17-70.88) | 75.17<br>(71.29-79.48) | 66.03<br>(58.70-71.19)                                                              | 74.26<br>(69.65-77.49) | 74.72<br>(67.84-82.42) |
| Lebanon      | 97.33<br>(96.25-98.17)                                                                                                                                              | 98.95<br>(98.51-99.32) | 99.94<br>(99.76-100.00) | 45.68<br>(41.69-51.14)                                                                                   | 55.26<br>(50.58-60.94) | 74.05<br>(68.82-77.51) | 43.24<br>(39.01-47.79)                                                                                                 | 52.39<br>(46.70-58.63) | 75.23<br>(69.11-80.12) | 50.81<br>(28.13-59.84)                                                              | 55.49<br>(42.61-61.21) | 55.77<br>(46.27-63.52) |
| Libya        | 70.02<br>(61.78-78.12)                                                                                                                                              | 80.90<br>(74.57-86.14) | 91.74<br>(88.59-94.18)  | 42.38<br>(39.69-47.22)                                                                                   | 50.20<br>(47.46-53.58) | 59.57<br>(54.35-64.40) | 42.76<br>(39.48-46.15)                                                                                                 | 50.01<br>(46.91-53.37) | 62.51<br>(55.50-68.83) | 51.20<br>(32.64-56.71)                                                              | 50.02<br>(37.36-55.38) | 49.28<br>(38.62-56.09) |
| Morocco      | 27.27<br>(24.62-30.09)                                                                                                                                              | 61.18<br>(58.59-63.71) | 82.66<br>(77.61-86.79)  | 31.68<br>(29.44-37.31)                                                                                   | 41.28<br>(39.16-45.75) | 54.66<br>(50.23-59.11) | 27.46<br>(24.42-30.68)                                                                                                 | 37.43<br>(34.98-40.04) | 51.65<br>(46.61-56.11) | 59.89<br>(57.35-61.83)                                                              | 51.84<br>(48.99-54.10) | 49.56<br>(46.94-51.79) |
| Palestine    | 95.45<br>(93.56-96.92)                                                                                                                                              | 98.09<br>(97.37-98.67) | 98.62<br>(98.06-99.04)  | 43.53<br>(40.28-48.54)                                                                                   | 51.86<br>(48.57-56.61) | 59.76<br>(54.70-65.24) | 40.36<br>(36.74-43.97)                                                                                                 | 48.99<br>(45.28-52.88) | 57.84<br>(51.47-64.58) | 74.05<br>(68.27-79.36)                                                              | 63.40<br>(59.07-66.76) | 57.89<br>(52.08-63.65) |
| Oman         | 93.45<br>(90.91-95.53)                                                                                                                                              | 97.15<br>(95.88-98.11) | 99.22<br>(98.79-99.55)  | 42.13<br>(38.99-47.00)                                                                                   | 62.02<br>(59.15-65.94) | 71.21<br>(67.83-75.21) | 40.53<br>(36.55-43.97)                                                                                                 | 63.37<br>(59.22-67.55) | 73.98<br>(70.60-77.44) | 63.86<br>(60.21-67.38)                                                              | 50.70<br>(47.04-54.06) | 53.43<br>(50.57-56.81) |
| Qatar        | 95.15<br>(93.25-96.83)                                                                                                                                              | 98.16<br>(97.29-98.79) | 99.77<br>(99.54-99.97)  | 55.20<br>(49.19-61.61)                                                                                   | 61.07<br>(54.51-67.51) | 73.00<br>(67.09-79.37) | 53.28<br>(46.42-60.77)                                                                                                 | 60.44<br>(51.95-69.00) | 74.21<br>(67.64-80.99) | 64.26<br>(53.65-73.95)                                                              | 71.12<br>(64.76-76.05) | 73.44<br>(65.84-82.87) |
| Saudi Arabia | 86.58<br>(82.69-89.50)                                                                                                                                              | 93.40<br>(91.38-95.02) | 97.57<br>(96.47-98.40)  | 40.21<br>(36.57-44.17)                                                                                   | 53.50<br>(49.52-57.38) | 67.51<br>(61.71-71.67) | 37.60<br>(33.25-41.80)                                                                                                 | 51.01<br>(45.41-56.34) | 68.65<br>(59.91-74.21) | 54.54<br>(38.42-60.93)                                                              | 53.19<br>(46.03-57.18) | 52.06<br>(46.19-56.78) |
| Sudan        | 68.29<br>(64.34-72.30)                                                                                                                                              | 78.41<br>(72.91-83.49) | 90.84<br>(87.50-93.74)  | 17.94<br>(15.65-24.75)                                                                                   | 24.67<br>(22.16-31.27) | 36.42<br>(31.22-41.98) | 15.95<br>(11.70-20.42)                                                                                                 | 22.83<br>(18.72-27.07) | 33.88<br>(27.85-38.78) | 39.62<br>(33.42-46.84)                                                              | 36.28<br>(33.45-39.61) | 39.60<br>(34.23-45.99) |

**Appendix Table 1a. Scaled values for each SDG health-related indicator and three summary indicators by country for 1990, 2000, and 2015**

| Location             | Indicator 3.1.2: Proportion of births attended by skilled health personnel (doctors, nurses, midwives, or country-specific medical staff [e.g., clinical officers]) |                        |                         | Indicator 3.2.1: Under-5 mortality rate (probability of dying before the age of 5 per 1,000 live births) |                        |                        | Indicator 3.2.2: Neonatal mortality rate (probability of dying during the first 28 days of life per 1,000 live births) |                        |                        | Indicator 3.3.1: Age-standardised rate of new HIV infections (per 1,000 population) |                        |                        |
|----------------------|---------------------------------------------------------------------------------------------------------------------------------------------------------------------|------------------------|-------------------------|----------------------------------------------------------------------------------------------------------|------------------------|------------------------|------------------------------------------------------------------------------------------------------------------------|------------------------|------------------------|-------------------------------------------------------------------------------------|------------------------|------------------------|
|                      | 1990                                                                                                                                                                | 2000                   | 2015                    | 1990                                                                                                     | 2000                   | 2015                   | 1990                                                                                                                   | 2000                   | 2015                   | 1990                                                                                | 2000                   | 2015                   |
| Syria                | 75.62<br>(68.59-81.69)                                                                                                                                              | 89.42<br>(86.55-91.79) | 97.18<br>(96.14-97.99)  | 41.93<br>(39.56-46.06)                                                                                   | 55.83<br>(53.27-59.36) | 54.78<br>(48.83-61.52) | 43.68<br>(40.64-46.71)                                                                                                 | 57.03<br>(54.26-59.96) | 65.13<br>(61.12-68.40) | 78.06<br>(75.00-80.32)                                                              | 81.25<br>(78.72-83.64) | 74.49<br>(70.18-79.56) |
| Tunisia              | 74.48<br>(71.28-77.62)                                                                                                                                              | 92.25<br>(90.43-93.83) | 98.98<br>(98.54-99.34)  | 38.88<br>(36.49-44.30)                                                                                   | 50.94<br>(48.55-54.44) | 63.96<br>(60.01-67.52) | 37.19<br>(34.13-40.23)                                                                                                 | 48.55<br>(45.93-51.32) | 64.37<br>(59.46-67.91) | 65.57<br>(61.29-68.77)                                                              | 61.20<br>(57.53-64.65) | 53.96<br>(48.94-58.81) |
| Turkey               | 73.77<br>(71.08-76.36)                                                                                                                                              | 82.17<br>(80.36-83.98) | 94.08<br>(92.11-95.67)  | 31.57<br>(28.74-37.20)                                                                                   | 43.97<br>(40.64-49.25) | 60.63<br>(54.99-65.49) | 28.10<br>(24.80-31.40)                                                                                                 | 40.49<br>(36.84-43.88) | 59.23<br>(51.96-65.74) | 84.81<br>(78.45-91.01)                                                              | 69.95<br>(65.96-73.89) | 64.25<br>(58.66-71.10) |
| United Arab Emirates | 96.78<br>(95.35-97.89)                                                                                                                                              | 99.16<br>(98.68-99.53) | 99.85<br>(99.65-100.00) | 53.57<br>(44.50-62.97)                                                                                   | 66.58<br>(58.33-75.54) | 81.62<br>(72.32-89.11) | 51.37<br>(40.41-64.73)                                                                                                 | 67.23<br>(55.58-77.55) | 83.17<br>(73.25-91.39) | 56.87<br>(33.24-66.37)                                                              | 55.63<br>(38.52-65.72) | 52.79<br>(39.14-66.00) |
| Yemen                | 32.26<br>(29.49-35.08)                                                                                                                                              | 28.19<br>(24.50-31.70) | 49.02<br>(41.02-56.49)  | 18.97<br>(17.37-25.59)                                                                                   | 27.73<br>(25.60-33.79) | 37.24<br>(33.85-42.32) | 16.08<br>(12.94-19.50)                                                                                                 | 25.74<br>(22.66-28.82) | 37.92<br>(34.56-40.76) | 49.01<br>(33.36-53.18)                                                              | 48.44<br>(42.54-50.96) | 52.28<br>(45.30-57.25) |
| Bangladesh           | 0.89<br>(0.00-4.55)                                                                                                                                                 | 11.16<br>(7.49-15.14)  | 36.46<br>(22.66-52.05)  | 17.53<br>(16.02-24.14)                                                                                   | 27.95<br>(25.93-33.67) | 43.61<br>(41.66-48.36) | 3.61<br>(0.00-7.56)                                                                                                    | 16.57<br>(13.60-20.26) | 34.35<br>(31.28-37.39) | 100.00<br>(100.00-100.00)                                                           | 64.15<br>(58.75-66.27) | 53.22<br>(51.02-55.20) |
| Bhutan               | 17.98<br>(3.42-39.98)                                                                                                                                               | 30.96<br>(12.72-50.97) | 57.52<br>(37.82-75.71)  | 19.99<br>(17.99-26.14)                                                                                   | 28.35<br>(26.17-34.33) | 41.20<br>(38.26-45.97) | 6.64<br>(2.04-11.25)                                                                                                   | 17.51<br>(13.49-21.54) | 31.90<br>(27.68-35.64) | 52.46<br>(27.61-63.18)                                                              | 47.80<br>(34.25-55.01) | 46.99<br>(36.60-56.65) |
| India                | 28.20<br>(17.15-41.43)                                                                                                                                              | 41.51<br>(34.40-49.88) | 75.28<br>(61.06-86.74)  | 21.20<br>(19.48-27.41)                                                                                   | 27.97<br>(26.01-33.89) | 39.09<br>(36.30-43.99) | 8.35<br>(4.75-12.08)                                                                                                   | 15.95<br>(12.69-19.61) | 28.04<br>(23.90-31.86) | 40.35<br>(38.74-41.98)                                                              | 29.68<br>(28.45-30.95) | 35.64<br>(34.01-37.22) |
| Nepal                | 2.14<br>(0.00-8.10)                                                                                                                                                 | 14.50<br>(10.11-19.02) | 47.27<br>(32.85-61.02)  | 17.68<br>(16.04-24.18)                                                                                   | 28.78<br>(26.78-34.62) | 44.73<br>(41.95-49.34) | 5.14<br>(1.47-9.22)                                                                                                    | 18.84<br>(15.78-22.22) | 37.07<br>(33.78-39.78) | 81.29<br>(62.43-86.45)                                                              | 37.47<br>(23.85-46.10) | 45.01<br>(38.71-49.41) |
| Pakistan             | 12.74<br>(9.57-15.71)                                                                                                                                               | 30.25<br>(25.84-34.30) | 61.15<br>(52.29-69.41)  | 22.11<br>(20.29-28.37)                                                                                   | 26.37<br>(24.44-32.30) | 33.89<br>(31.38-39.16) | 5.28<br>(2.09-8.99)                                                                                                    | 10.40<br>(7.33-13.74)  | 19.42<br>(15.95-22.76) | 68.54<br>(49.91-73.34)                                                              | 63.45<br>(53.77-67.63) | 49.23<br>(39.44-57.69) |
| Botswana             | 80.23<br>(76.07-83.83)                                                                                                                                              | 85.62<br>(78.65-91.17) | 90.72<br>(84.93-94.91)  | 37.14<br>(34.46-42.66)                                                                                   | 33.69<br>(30.94-39.02) | 50.20<br>(45.68-54.68) | 37.68<br>(34.33-41.01)                                                                                                 | 37.92<br>(34.19-41.48) | 48.73<br>(43.23-53.49) | 5.81<br>(5.10-6.56)                                                                 | 0.48<br>(0.00-1.16)    | 3.94<br>(2.80-5.19)    |

**Appendix Table 1a. Scaled values for each SDG health-related indicator and three summary indicators by country for 1990, 2000, and 2015**

| Location      | Indicator 3.1.2: Proportion of births attended by skilled health personnel (doctors, nurses, midwives, or country-specific medical staff [e.g., clinical officers]) |                        |                        | Indicator 3.2.1: Under-5 mortality rate (probability of dying before the age of 5 per 1,000 live births) |                        |                        | Indicator 3.2.2: Neonatal mortality rate (probability of dying during the first 28 days of life per 1,000 live births) |                        |                        | Indicator 3.3.1: Age-standardised rate of new HIV infections (per 1,000 population) |                        |                        |
|---------------|---------------------------------------------------------------------------------------------------------------------------------------------------------------------|------------------------|------------------------|----------------------------------------------------------------------------------------------------------|------------------------|------------------------|------------------------------------------------------------------------------------------------------------------------|------------------------|------------------------|-------------------------------------------------------------------------------------|------------------------|------------------------|
|               | 1990                                                                                                                                                                | 2000                   | 2015                   | 1990                                                                                                     | 2000                   | 2015                   | 1990                                                                                                                   | 2000                   | 2015                   | 1990                                                                                | 2000                   | 2015                   |
| Lesotho       | 44.96<br>(34.93-55.83)                                                                                                                                              | 52.49<br>(48.90-56.05) | 66.75<br>(59.38-73.45) | 26.10<br>(24.02-32.25)                                                                                   | 22.95<br>(20.88-29.03) | 28.05<br>(24.33-34.17) | 17.56<br>(14.37-21.10)                                                                                                 | 17.55<br>(14.59-20.89) | 19.78<br>(14.71-24.29) | 12.30<br>(11.15-13.62)                                                              | 2.02<br>(1.27-2.71)    | 2.96<br>(1.99-3.91)    |
| Namibia       | 68.52<br>(65.17-71.55)                                                                                                                                              | 78.55<br>(76.36-80.53) | 85.98<br>(80.44-90.39) | 31.23<br>(28.57-37.09)                                                                                   | 33.66<br>(30.86-38.93) | 43.02<br>(38.84-47.69) | 28.82<br>(25.12-32.70)                                                                                                 | 32.60<br>(28.98-36.21) | 38.70<br>(33.22-43.91) | 13.76<br>(12.87-14.67)                                                              | 3.33<br>(2.64-4.03)    | 7.34<br>(6.30-8.45)    |
| South Africa  | 87.13<br>(83.11-90.97)                                                                                                                                              | 91.11<br>(88.78-92.89) | 94.52<br>(91.44-96.85) | 29.05<br>(26.14-34.74)                                                                                   | 30.80<br>(28.00-36.23) | 42.11<br>(38.13-47.08) | 29.10<br>(25.54-32.91)                                                                                                 | 33.49<br>(30.22-37.23) | 41.97<br>(37.29-46.66) | 24.45<br>(23.17-25.80)                                                              | 3.67<br>(3.09-4.28)    | 5.74<br>(4.87-6.66)    |
| Swaziland     | 74.40<br>(65.58-81.91)                                                                                                                                              | 76.16<br>(72.81-79.23) | 82.89<br>(77.21-87.39) | 31.60<br>(29.10-37.12)                                                                                   | 25.65<br>(23.41-31.77) | 36.75<br>(33.19-41.33) | 36.36<br>(33.20-39.51)                                                                                                 | 35.77<br>(32.79-38.90) | 39.46<br>(35.81-43.41) | 7.15<br>(6.08-8.25)                                                                 | 0.12<br>(0.00-0.49)    | 2.71<br>(1.98-3.67)    |
| Zimbabwe      | 70.61<br>(67.54-73.64)                                                                                                                                              | 73.79<br>(71.51-75.96) | 66.68<br>(59.60-73.25) | 33.04<br>(30.86-38.65)                                                                                   | 29.49<br>(27.32-35.39) | 36.76<br>(34.07-41.89) | 34.44<br>(31.25-37.69)                                                                                                 | 34.66<br>(31.32-38.17) | 34.67<br>(31.08-37.86) | 3.59<br>(2.89-4.37)                                                                 | 3.76<br>(2.64-4.84)    | 7.50<br>(5.29-9.55)    |
| Benin         | 70.61<br>(63.50-77.22)                                                                                                                                              | 79.54<br>(76.81-82.09) | 88.29<br>(84.89-91.24) | 11.60<br>(10.39-18.71)                                                                                   | 17.07<br>(15.27-23.66) | 29.50<br>(27.04-35.23) | 13.60<br>(8.68-18.66)                                                                                                  | 19.75<br>(15.05-24.56) | 30.82<br>(26.61-35.02) | 25.74<br>(21.48-29.76)                                                              | 22.48<br>(20.78-24.30) | 27.16<br>(24.32-29.73) |
| Burkina Faso  | 37.47<br>(31.22-44.25)                                                                                                                                              | 42.99<br>(38.98-47.07) | 68.01<br>(60.01-75.51) | 8.50<br>(7.15-15.74)                                                                                     | 11.93<br>(10.45-18.65) | 22.16<br>(19.89-28.23) | 13.12<br>(8.03-18.41)                                                                                                  | 17.35<br>(12.35-22.54) | 27.28<br>(22.49-31.93) | 15.40<br>(13.24-17.52)                                                              | 22.31<br>(20.14-24.77) | 28.12<br>(25.53-30.88) |
| Cameroon      | 62.09<br>(59.08-65.29)                                                                                                                                              | 58.21<br>(55.77-60.70) | 66.79<br>(60.70-72.26) | 17.58<br>(15.98-24.14)                                                                                   | 17.46<br>(15.78-24.07) | 26.55<br>(23.35-32.72) | 19.59<br>(15.02-24.39)                                                                                                 | 18.46<br>(13.98-23.19) | 25.35<br>(20.84-29.92) | 16.34<br>(13.69-18.85)                                                              | 13.43<br>(12.10-14.75) | 16.69<br>(14.04-19.29) |
| Cape Verde    | 47.74<br>(35.25-59.17)                                                                                                                                              | 56.97<br>(45.01-68.09) | 69.91<br>(58.37-79.69) | 35.92<br>(33.71-41.26)                                                                                   | 40.83<br>(37.90-45.58) | 50.13<br>(47.64-53.71) | 34.94<br>(31.92-38.01)                                                                                                 | 39.13<br>(36.04-41.91) | 47.58<br>(44.68-50.58) | 28.04<br>(24.58-31.78)                                                              | 29.00<br>(26.33-31.73) | 28.80<br>(21.11-33.99) |
| Chad          | 11.00<br>(6.03-16.79)                                                                                                                                               | 16.48<br>(12.35-20.24) | 21.07<br>(13.87-29.76) | 9.19<br>(7.80-16.27)                                                                                     | 11.24<br>(9.66-18.30)  | 18.60<br>(15.84-24.80) | 10.44<br>(5.62-15.47)                                                                                                  | 13.39<br>(8.65-18.17)  | 20.97<br>(15.45-25.87) | 21.24<br>(17.65-24.75)                                                              | 16.90<br>(15.19-18.70) | 23.39<br>(19.89-26.97) |
| Cote d'Ivoire | 46.96<br>(40.32-53.36)                                                                                                                                              | 62.08<br>(58.51-65.68) | 61.87<br>(54.68-68.82) | 15.75<br>(14.26-22.43)                                                                                   | 16.96<br>(15.32-23.40) | 25.67<br>(23.20-31.59) | 10.78<br>(6.83-15.21)                                                                                                  | 12.29<br>(8.27-16.55)  | 20.71<br>(16.68-24.77) | 14.68<br>(12.57-16.75)                                                              | 14.38<br>(12.73-16.03) | 17.85<br>(15.25-20.62) |

**Appendix Table 1a. Scaled values for each SDG health-related indicator and three summary indicators by country for 1990, 2000, and 2015**

| Location              | Indicator 3.1.2: Proportion of births attended by skilled health personnel (doctors, nurses, midwives, or country-specific medical staff [e.g., clinical officers]) |                        |                        | Indicator 3.2.1: Under-5 mortality rate (probability of dying before the age of 5 per 1,000 live births) |                        |                        | Indicator 3.2.2: Neonatal mortality rate (probability of dying during the first 28 days of life per 1,000 live births) |                        |                        | Indicator 3.3.1: Age-standardised rate of new HIV infections (per 1,000 population) |                        |                        |
|-----------------------|---------------------------------------------------------------------------------------------------------------------------------------------------------------------|------------------------|------------------------|----------------------------------------------------------------------------------------------------------|------------------------|------------------------|------------------------------------------------------------------------------------------------------------------------|------------------------|------------------------|-------------------------------------------------------------------------------------|------------------------|------------------------|
|                       | 1990                                                                                                                                                                | 2000                   | 2015                   | 1990                                                                                                     | 2000                   | 2015                   | 1990                                                                                                                   | 2000                   | 2015                   | 1990                                                                                | 2000                   | 2015                   |
| The Gambia            | 51.46<br>(39.84-61.99)                                                                                                                                              | 54.34<br>(47.00-61.37) | 58.96<br>(47.47-68.77) | 21.71<br>(19.81-28.22)                                                                                   | 27.58<br>(25.44-33.55) | 40.60<br>(38.23-44.56) | 21.07<br>(16.48-26.28)                                                                                                 | 26.49<br>(22.35-31.11) | 37.88<br>(34.44-41.70) | 35.28<br>(32.00-38.45)                                                              | 22.04<br>(20.09-24.02) | 27.47<br>(23.57-32.06) |
| Ghana                 | 39.46<br>(35.80-43.28)                                                                                                                                              | 48.06<br>(45.04-51.24) | 65.04<br>(58.43-71.67) | 19.90<br>(18.14-26.25)                                                                                   | 24.59<br>(22.64-30.55) | 36.48<br>(34.19-41.80) | 17.28<br>(12.66-22.13)                                                                                                 | 21.89<br>(17.57-26.57) | 32.37<br>(28.38-36.41) | 20.52<br>(18.36-22.68)                                                              | 18.77<br>(17.17-20.34) | 24.73<br>(22.24-27.55) |
| Guinea                | 33.21<br>(26.05-40.58)                                                                                                                                              | 34.71<br>(31.08-37.94) | 49.19<br>(42.16-56.08) | 6.34<br>(5.02-13.87)                                                                                     | 12.24<br>(10.78-19.19) | 22.50<br>(20.09-27.37) | 2.84<br>(0.00-8.37)                                                                                                    | 10.99<br>(7.44-16.08)  | 21.89<br>(18.07-26.50) | 24.68<br>(20.11-28.62)                                                              | 20.31<br>(18.72-22.02) | 23.45<br>(20.65-26.76) |
| Guinea-Bissau         | 35.43<br>(24.50-47.37)                                                                                                                                              | 36.87<br>(30.02-44.56) | 38.61<br>(27.32-49.80) | 8.43<br>(6.74-15.64)                                                                                     | 11.72<br>(9.73-18.86)  | 19.71<br>(16.69-25.90) | 7.97<br>(1.94-14.65)                                                                                                   | 12.15<br>(6.29-18.59)  | 20.44<br>(14.93-26.16) | 29.06<br>(25.82-31.74)                                                              | 16.47<br>(15.06-17.77) | 18.18<br>(15.47-20.75) |
| Liberia               | 44.33<br>(32.50-56.81)                                                                                                                                              | 38.67<br>(31.56-45.83) | 62.96<br>(57.08-68.75) | 6.66<br>(5.10-14.05)                                                                                     | 13.24<br>(11.87-20.06) | 31.30<br>(29.11-36.93) | 5.13<br>(0.55-9.88)                                                                                                    | 13.40<br>(9.49-17.67)  | 31.70<br>(28.22-35.15) | 22.42<br>(19.18-25.50)                                                              | 19.92<br>(18.03-22.00) | 26.30<br>(22.27-30.66) |
| Mali                  | 23.66<br>(18.67-28.91)                                                                                                                                              | 39.26<br>(35.07-43.55) | 57.02<br>(49.18-64.26) | 6.35<br>(5.21-13.68)                                                                                     | 10.16<br>(8.63-17.05)  | 18.65<br>(15.83-24.85) | 1.91<br>(0.00-7.28)                                                                                                    | 7.30<br>(4.46-12.38)   | 17.12<br>(12.77-22.07) | 23.79<br>(20.41-27.60)                                                              | 21.91<br>(19.82-24.05) | 25.35<br>(22.29-29.19) |
| Mauritania            | 51.88<br>(43.21-59.47)                                                                                                                                              | 54.59<br>(51.60-57.33) | 64.14<br>(55.05-72.84) | 22.46<br>(20.56-28.46)                                                                                   | 25.88<br>(24.07-31.79) | 36.66<br>(34.36-41.96) | 17.12<br>(12.79-21.76)                                                                                                 | 20.38<br>(16.45-24.89) | 30.88<br>(26.69-34.78) | 35.45<br>(16.21-41.57)                                                              | 29.77<br>(19.62-34.17) | 38.70<br>(35.03-40.97) |
| Niger                 | 11.33<br>(7.43-15.38)                                                                                                                                               | 15.18<br>(11.52-18.72) | 31.60<br>(24.19-39.55) | 0.64<br>(0.00-8.33)                                                                                      | 6.87<br>(5.38-14.11)   | 21.71<br>(19.23-27.78) | 9.32<br>(3.57-15.98)                                                                                                   | 18.43<br>(12.88-24.75) | 33.85<br>(28.89-39.29) | 27.91<br>(25.59-30.32)                                                              | 22.91<br>(21.05-24.91) | 34.03<br>(30.14-37.68) |
| Nigeria               | 33.06<br>(27.85-38.28)                                                                                                                                              | 37.51<br>(32.94-41.98) | 42.88<br>(36.80-49.12) | 8.48<br>(6.97-15.71)                                                                                     | 11.27<br>(9.56-18.35)  | 23.48<br>(21.06-28.25) | 8.52<br>(2.95-14.98)                                                                                                   | 10.98<br>(5.75-17.03)  | 22.46<br>(17.90-27.92) | 19.83<br>(16.18-23.54)                                                              | 17.59<br>(15.93-19.31) | 19.98<br>(17.32-22.98) |
| Sao Tome and Principe | 78.94<br>(70.07-85.66)                                                                                                                                              | 81.59<br>(77.19-85.83) | 85.55<br>(80.29-89.71) | 22.95<br>(21.25-28.85)                                                                                   | 29.80<br>(27.94-34.71) | 44.03<br>(40.74-48.87) | 25.13<br>(20.84-29.88)                                                                                                 | 30.68<br>(26.88-34.61) | 42.90<br>(39.29-46.41) | 58.28<br>(56.44-60.03)                                                              | 46.90<br>(44.87-48.70) | 45.93<br>(43.99-47.92) |
| Senegal               | 43.64<br>(38.90-48.25)                                                                                                                                              | 65.54<br>(61.53-69.03) | 75.24<br>(69.79-80.04) | 16.43<br>(14.96-23.18)                                                                                   | 20.80<br>(18.98-27.05) | 37.71<br>(35.75-42.95) | 17.98<br>(12.90-24.04)                                                                                                 | 22.33<br>(17.62-27.76) | 37.85<br>(34.14-41.99) | 31.21<br>(28.91-33.17)                                                              | 25.11<br>(23.40-26.78) | 29.37<br>(26.27-33.92) |

**Appendix Table 1a. Scaled values for each SDG health-related indicator and three summary indicators by country for 1990, 2000, and 2015**

| Location     | Indicator 3.1.2: Proportion of births attended by skilled health personnel (doctors, nurses, midwives, or country-specific medical staff [e.g., clinical officers]) |                        |                        | Indicator 3.2.1: Under-5 mortality rate (probability of dying before the age of 5 per 1,000 live births) |                        |                        | Indicator 3.2.2: Neonatal mortality rate (probability of dying during the first 28 days of life per 1,000 live births) |                        |                        | Indicator 3.3.1: Age-standardised rate of new HIV infections (per 1,000 population) |                        |                        |
|--------------|---------------------------------------------------------------------------------------------------------------------------------------------------------------------|------------------------|------------------------|----------------------------------------------------------------------------------------------------------|------------------------|------------------------|------------------------------------------------------------------------------------------------------------------------|------------------------|------------------------|-------------------------------------------------------------------------------------|------------------------|------------------------|
|              | 1990                                                                                                                                                                | 2000                   | 2015                   | 1990                                                                                                     | 2000                   | 2015                   | 1990                                                                                                                   | 2000                   | 2015                   | 1990                                                                                | 2000                   | 2015                   |
| Sierra Leone | 40.36<br>(29.05-51.54)                                                                                                                                              | 40.02<br>(33.94-45.94) | 61.09<br>(53.98-67.56) | 4.80<br>(3.56-12.50)                                                                                     | 8.22<br>(7.03-15.41)   | 19.96<br>(18.06-25.12) | 3.69<br>(0.00-8.79)                                                                                                    | 8.08<br>(4.25-12.89)   | 21.33<br>(17.69-25.35) | 31.27<br>(25.52-38.73)                                                              | 22.23<br>(20.31-24.04) | 25.74<br>(21.70-31.79) |
| Togo         | 42.96<br>(38.42-47.49)                                                                                                                                              | 52.50<br>(48.48-56.68) | 67.04<br>(59.10-73.61) | 16.39<br>(14.71-23.02)                                                                                   | 19.85<br>(18.05-26.08) | 29.45<br>(27.38-35.18) | 16.09<br>(10.96-21.28)                                                                                                 | 19.68<br>(14.98-24.50) | 27.33<br>(23.06-31.50) | 20.88<br>(18.89-22.82)                                                              | 15.05<br>(13.41-16.73) | 24.65<br>(20.97-28.38) |
| Burundi      | 17.56<br>(9.91-26.15)                                                                                                                                               | 37.33<br>(27.60-47.37) | 63.26<br>(48.56-75.95) | 12.46<br>(10.38-19.24)                                                                                   | 13.42<br>(11.20-20.17) | 29.94<br>(23.93-36.32) | 16.09<br>(10.81-21.76)                                                                                                 | 16.77<br>(11.61-22.82) | 32.08<br>(25.21-37.90) | 14.54<br>(12.28-17.18)                                                              | 17.08<br>(15.39-18.95) | 23.84<br>(20.98-26.53) |
| Comoros      | 51.21<br>(37.14-64.44)                                                                                                                                              | 69.23<br>(62.98-74.89) | 84.39<br>(77.09-89.84) | 20.35<br>(18.31-27.03)                                                                                   | 27.62<br>(24.23-33.54) | 41.47<br>(34.70-48.10) | 14.23<br>(10.29-18.09)                                                                                                 | 22.10<br>(17.25-26.97) | 36.12<br>(28.23-43.14) | 65.03<br>(41.82-71.56)                                                              | 45.12<br>(30.74-52.83) | 43.50<br>(33.97-51.73) |
| Djibouti     | 75.33<br>(60.19-87.47)                                                                                                                                              | 79.94<br>(70.82-86.98) | 90.14<br>(82.70-94.92) | 21.71<br>(19.72-28.27)                                                                                   | 23.78<br>(21.65-30.07) | 33.12<br>(29.72-38.67) | 25.48<br>(21.12-30.43)                                                                                                 | 27.10<br>(22.86-31.78) | 34.65<br>(30.17-38.80) | 22.90<br>(17.24-28.66)                                                              | 21.64<br>(19.04-24.37) | 25.47<br>(21.57-29.28) |
| Eritrea      | 12.51<br>(7.11-18.81)                                                                                                                                               | 24.17<br>(20.96-27.54) | 28.11<br>(12.86-46.50) | 15.96<br>(13.94-22.31)                                                                                   | 18.38<br>(9.67-26.80)  | 32.64<br>(28.43-38.37) | 22.37<br>(17.59-27.53)                                                                                                 | 26.71<br>(18.74-33.82) | 36.35<br>(31.17-40.66) | 26.10<br>(21.83-29.99)                                                              | 26.35<br>(23.66-28.90) | 31.16<br>(27.57-34.92) |
| Ethiopia     | 3.90<br>(0.00-10.92)                                                                                                                                                | 6.40<br>(2.28-10.83)   | 14.94<br>(5.95-25.89)  | 9.09<br>(7.62-16.10)                                                                                     | 16.60<br>(15.02-23.14) | 34.80<br>(32.39-40.21) | 3.75<br>(0.00-8.61)                                                                                                    | 14.04<br>(10.36-18.57) | 32.15<br>(28.64-35.64) | 15.69<br>(13.66-18.08)                                                              | 17.72<br>(15.89-19.73) | 26.15<br>(23.68-28.96) |
| Kenya        | 47.92<br>(42.35-53.34)                                                                                                                                              | 48.09<br>(43.68-52.77) | 51.54<br>(35.57-66.89) | 25.93<br>(23.92-31.95)                                                                                   | 26.80<br>(24.67-32.60) | 38.29<br>(35.96-43.45) | 28.61<br>(25.06-32.35)                                                                                                 | 30.27<br>(26.94-33.81) | 37.70<br>(34.38-40.84) | 8.18<br>(7.52-8.88)                                                                 | 14.10<br>(13.11-15.16) | 15.50<br>(14.00-17.01) |
| Madagascar   | 54.90<br>(51.02-58.78)                                                                                                                                              | 43.01<br>(39.60-46.67) | 43.66<br>(30.82-56.63) | 16.61<br>(14.40-23.06)                                                                                   | 22.81<br>(20.28-29.30) | 33.57<br>(29.28-39.29) | 20.59<br>(16.12-25.43)                                                                                                 | 26.38<br>(22.26-30.76) | 35.28<br>(30.14-39.53) | 30.51<br>(8.19-45.32)                                                               | 38.40<br>(23.47-48.71) | 46.41<br>(35.23-58.13) |
| Malawi       | 55.52<br>(48.29-62.75)                                                                                                                                              | 61.41<br>(56.88-65.85) | 76.10<br>(66.06-84.96) | 6.82<br>(5.04-13.75)                                                                                     | 13.29<br>(11.32-20.18) | 28.14<br>(24.88-32.61) | 8.61<br>(3.59-14.22)                                                                                                   | 19.37<br>(14.78-24.33) | 30.52<br>(25.69-35.17) | 6.62<br>(5.70-7.63)                                                                 | 6.99<br>(5.65-8.25)    | 13.05<br>(11.07-16.18) |
| Mozambique   | 41.52<br>(31.18-52.39)                                                                                                                                              | 45.96<br>(43.51-48.24) | 61.12<br>(53.13-68.71) | 7.82<br>(6.56-15.20)                                                                                     | 14.54<br>(13.05-21.27) | 29.48<br>(27.24-35.22) | 6.99<br>(2.94-11.44)                                                                                                   | 17.27<br>(13.40-21.36) | 32.13<br>(28.56-35.33) | 16.13<br>(14.59-17.67)                                                              | 8.28<br>(7.31-9.26)    | 11.07<br>(9.15-13.31)  |

**Appendix Table 1a. Scaled values for each SDG health-related indicator and three summary indicators by country for 1990, 2000, and 2015**

| Location                         | Indicator 3.1.2: Proportion of births attended by skilled health personnel (doctors, nurses, midwives, or country-specific medical staff [e.g., clinical officers]) |                        |                        | Indicator 3.2.1: Under-5 mortality rate (probability of dying before the age of 5 per 1,000 live births) |                        |                        | Indicator 3.2.2: Neonatal mortality rate (probability of dying during the first 28 days of life per 1,000 live births) |                        |                        | Indicator 3.3.1: Age-standardised rate of new HIV infections (per 1,000 population) |                        |                        |
|----------------------------------|---------------------------------------------------------------------------------------------------------------------------------------------------------------------|------------------------|------------------------|----------------------------------------------------------------------------------------------------------|------------------------|------------------------|------------------------------------------------------------------------------------------------------------------------|------------------------|------------------------|-------------------------------------------------------------------------------------|------------------------|------------------------|
|                                  | 1990                                                                                                                                                                | 2000                   | 2015                   | 1990                                                                                                     | 2000                   | 2015                   | 1990                                                                                                                   | 2000                   | 2015                   | 1990                                                                                | 2000                   | 2015                   |
| Rwanda                           | 27.08<br>(18.63-36.07)                                                                                                                                              | 32.38<br>(25.87-39.23) | 77.16<br>(65.79-85.94) | 14.96<br>(12.92-21.83)                                                                                   | 14.40<br>(12.42-21.07) | 33.10<br>(28.96-38.74) | 17.10<br>(12.58-22.62)                                                                                                 | 15.70<br>(11.13-20.87) | 32.90<br>(27.62-37.74) | 12.73<br>(11.23-14.19)                                                              | 15.69<br>(14.21-17.33) | 23.55<br>(21.17-25.99) |
| Somalia                          | 29.70<br>(13.42-49.48)                                                                                                                                              | 27.98<br>(16.59-41.68) | 31.96<br>(17.16-49.07) | 10.75<br>(9.11-17.96)                                                                                    | 14.33<br>(12.49-20.88) | 21.84<br>(18.67-27.91) | 13.57<br>(8.71-18.75)                                                                                                  | 17.86<br>(13.49-22.71) | 25.72<br>(20.82-30.38) | 35.75<br>(30.32-40.68)                                                              | 29.68<br>(27.23-31.91) | 34.17<br>(30.32-37.65) |
| South Sudan                      | 36.27<br>(17.12-57.31)                                                                                                                                              | 35.39<br>(20.59-52.23) | 41.19<br>(27.80-54.18) | 9.32<br>(7.53-16.28)                                                                                     | 17.01<br>(15.20-23.87) | 22.88<br>(19.36-27.75) | 13.08<br>(8.69-17.77)                                                                                                  | 22.97<br>(18.97-27.45) | 28.74<br>(23.83-33.51) | 25.17<br>(18.68-32.54)                                                              | 20.14<br>(17.30-23.23) | 22.95<br>(19.74-26.77) |
| Tanzania                         | 53.68<br>(50.38-56.78)                                                                                                                                              | 44.24<br>(41.08-47.41) | 56.01<br>(44.30-66.81) | 14.86<br>(13.42-21.63)                                                                                   | 20.11<br>(18.33-26.49) | 34.88<br>(32.24-40.18) | 18.39<br>(14.43-22.63)                                                                                                 | 24.63<br>(20.99-28.57) | 36.39<br>(32.77-39.85) | 10.95<br>(9.90-12.11)                                                               | 12.53<br>(11.06-14.01) | 16.71<br>(14.43-18.99) |
| Uganda                           | 36.62<br>(32.67-40.64)                                                                                                                                              | 40.00<br>(36.05-43.46) | 68.17<br>(59.48-76.02) | 13.14<br>(11.84-20.15)                                                                                   | 18.51<br>(16.73-24.95) | 31.90<br>(29.73-37.52) | 18.72<br>(14.44-23.37)                                                                                                 | 23.63<br>(19.53-28.02) | 33.75<br>(30.30-37.32) | 7.22<br>(5.68-8.82)                                                                 | 11.56<br>(10.38-12.76) | 14.94<br>(12.63-17.71) |
| Zambia                           | 50.11<br>(44.51-55.22)                                                                                                                                              | 48.50<br>(44.75-52.44) | 73.52<br>(66.44-79.88) | 13.02<br>(11.01-19.75)                                                                                   | 15.99<br>(13.72-22.68) | 33.02<br>(29.72-37.30) | 20.50<br>(15.96-25.27)                                                                                                 | 26.07<br>(21.45-31.11) | 37.78<br>(34.06-41.89) | 6.12<br>(5.16-6.99)                                                                 | 6.91<br>(5.80-8.02)    | 11.22<br>(9.88-12.78)  |
| Angola                           | 36.79<br>(28.28-45.76)                                                                                                                                              | 43.82<br>(40.02-47.54) | 72.71<br>(65.71-79.09) | 10.42<br>(7.64-17.65)                                                                                    | 14.80<br>(11.90-21.84) | 29.42<br>(24.07-36.32) | 17.11<br>(10.58-23.90)                                                                                                 | 21.61<br>(16.06-27.39) | 34.63<br>(28.13-40.85) | 27.02<br>(22.68-30.97)                                                              | 20.04<br>(18.33-21.65) | 21.07<br>(18.18-23.97) |
| Central African Republic         | 48.25<br>(42.82-53.60)                                                                                                                                              | 46.68<br>(42.39-51.16) | 60.62<br>(53.85-67.58) | 11.87<br>(9.42-18.41)                                                                                    | 13.56<br>(10.50-20.75) | 19.32<br>(13.71-26.19) | 10.76<br>(5.26-16.24)                                                                                                  | 13.65<br>(8.05-19.48)  | 17.49<br>(9.63-24.11)  | 11.03<br>(8.84-13.07)                                                               | 11.30<br>(9.90-12.84)  | 15.49<br>(12.77-18.01) |
| Congo                            | 91.67<br>(87.78-94.52)                                                                                                                                              | 92.29<br>(90.06-94.14) | 95.63<br>(94.10-96.88) | 25.70<br>(23.37-31.88)                                                                                   | 22.36<br>(19.69-28.45) | 36.38<br>(32.32-41.16) | 31.87<br>(27.09-36.93)                                                                                                 | 27.29<br>(22.21-32.38) | 37.58<br>(32.79-42.95) | 13.14<br>(11.52-14.84)                                                              | 16.17<br>(14.59-17.91) | 19.20<br>(16.57-22.53) |
| Democratic Republic of the Congo | 65.71<br>(56.01-74.44)                                                                                                                                              | 68.35<br>(63.43-72.52) | 86.67<br>(83.92-89.07) | 13.33<br>(10.85-20.04)                                                                                   | 15.34<br>(12.83-22.16) | 27.05<br>(22.09-33.86) | 19.13<br>(13.86-24.45)                                                                                                 | 20.49<br>(15.25-25.59) | 30.05<br>(24.42-35.85) | 18.29<br>(16.19-20.78)                                                              | 18.76<br>(17.10-20.52) | 26.49<br>(21.33-30.90) |
| Equatorial Guinea                | 37.62<br>(27.31-48.84)                                                                                                                                              | 67.25<br>(59.14-75.37) | 92.01<br>(88.53-94.78) | 12.80<br>(10.28-19.68)                                                                                   | 14.32<br>(11.25-21.20) | 27.21<br>(21.27-33.70) | 14.29<br>(8.58-20.45)                                                                                                  | 15.30<br>(9.73-21.27)  | 27.07<br>(19.82-33.40) | 22.78<br>(17.21-26.88)                                                              | 15.81<br>(14.38-17.51) | 20.61<br>(16.78-23.77) |

**Appendix Table 1a. Scaled values for each SDG health-related indicator and three summary indicators by country for 1990, 2000, and 2015**

| Location | Indicator 3.1.2: Proportion of births attended by skilled health personnel (doctors, nurses, midwives, or country-specific medical staff [e.g., clinical officers]) |                        |                        | Indicator 3.2.1: Under-5 mortality rate (probability of dying before the age of 5 per 1,000 live births) |                        |                        | Indicator 3.2.2: Neonatal mortality rate (probability of dying during the first 28 days of life per 1,000 live births) |                        |                        | Indicator 3.3.1: Age-standardised rate of new HIV infections (per 1,000 population) |                        |                        |
|----------|---------------------------------------------------------------------------------------------------------------------------------------------------------------------|------------------------|------------------------|----------------------------------------------------------------------------------------------------------|------------------------|------------------------|------------------------------------------------------------------------------------------------------------------------|------------------------|------------------------|-------------------------------------------------------------------------------------|------------------------|------------------------|
|          | 1990                                                                                                                                                                | 2000                   | 2015                   | 1990                                                                                                     | 2000                   | 2015                   | 1990                                                                                                                   | 2000                   | 2015                   | 1990                                                                                | 2000                   | 2015                   |
| Gabon    | 85.09<br>(80.65-88.70)                                                                                                                                              | 88.42<br>(86.82-89.87) | 94.50<br>(93.06-95.68) | 28.10<br>(25.87-34.15)                                                                                   | 31.30<br>(29.19-37.30) | 40.30<br>(37.57-44.14) | 27.24<br>(23.59-31.70)                                                                                                 | 29.77<br>(26.38-33.66) | 36.94<br>(33.61-40.54) | 18.96<br>(17.16-20.75)                                                              | 11.96<br>(10.62-13.27) | 18.50<br>(15.21-22.06) |

**Appendix Table 1a. Scaled values for each SDG health-related indicator and three summary indicators by country for 1990, 2000, and 2015**

| Location      | Indicator 3.3.2: Age-standardised rate of new and relapsed TB cases (per 1,000 population) |                        |                         | Indicator 3.3.3: Age-standardised rate of malaria cases (per 1,000 population) |                           |                           | Indicator 3.3.4: Age-standardised rate of hepatitis B incident cases (per 100,000 population) |                        |                        | Indicator 3.3.5: Age-standardised prevalence rate of neglected tropical diseases (NTDs) (per 100,000 population) |                          |                          |
|---------------|--------------------------------------------------------------------------------------------|------------------------|-------------------------|--------------------------------------------------------------------------------|---------------------------|---------------------------|-----------------------------------------------------------------------------------------------|------------------------|------------------------|------------------------------------------------------------------------------------------------------------------|--------------------------|--------------------------|
|               | 1990                                                                                       | 2000                   | 2015                    | 1990                                                                           | 2000                      | 2015                      | 1990                                                                                          | 2000                   | 2015                   | 1990                                                                                                             | 2000                     | 2015                     |
| Canada        | 83.40<br>(81.86-84.86)                                                                     | 86.84<br>(84.97-88.60) | 92.56<br>(90.58-94.23)  | 100.00<br>(100.00-100.00)                                                      | 100.00<br>(100.00-100.00) | 100.00<br>(100.00-100.00) | 72.02<br>(65.51-76.81)                                                                        | 71.95<br>(65.68-77.37) | 71.25<br>(64.11-76.94) | 99.99<br>(99.99-100.00)                                                                                          | 99.99<br>(99.99-100.00)  | 100.00<br>(99.99-100.00) |
| United States | 77.17<br>(73.74-80.34)                                                                     | 92.94<br>(91.71-94.02) | 99.18<br>(97.81-100.00) | 100.00<br>(100.00-100.00)                                                      | 100.00<br>(100.00-100.00) | 100.00<br>(100.00-100.00) | 85.47<br>(80.11-88.95)                                                                        | 85.64<br>(80.66-89.16) | 85.22<br>(79.73-89.09) | 99.98<br>(99.98-99.99)                                                                                           | 99.97<br>(99.97-99.98)   | 99.98<br>(99.97-99.98)   |
| Australia     | 82.64<br>(79.30-85.84)                                                                     | 88.59<br>(86.93-90.26) | 87.09<br>(83.61-89.90)  | 100.00<br>(100.00-100.00)                                                      | 100.00<br>(100.00-100.00) | 100.00<br>(100.00-100.00) | 68.99<br>(62.40-74.27)                                                                        | 69.21<br>(62.52-75.06) | 68.76<br>(61.44-74.72) | 99.97<br>(99.95-99.98)                                                                                           | 99.98<br>(99.96-99.98)   | 99.98<br>(99.96-99.99)   |
| New Zealand   | 74.77<br>(71.92-77.54)                                                                     | 81.74<br>(79.41-83.96) | 85.19<br>(82.57-87.71)  | 100.00<br>(100.00-100.00)                                                      | 100.00<br>(100.00-100.00) | 100.00<br>(100.00-100.00) | 63.22<br>(56.41-68.90)                                                                        | 63.28<br>(56.37-69.55) | 63.27<br>(55.38-69.79) | 99.99<br>(99.99-100.00)                                                                                          | 100.00<br>(99.99-100.00) | 100.00<br>(99.99-100.00) |
| Brunei        | 41.16<br>(39.69-42.68)                                                                     | 45.29<br>(43.76-46.74) | 49.10<br>(47.34-50.70)  | 100.00<br>(100.00-100.00)                                                      | 100.00<br>(100.00-100.00) | 100.00<br>(100.00-100.00) | 56.51<br>(47.00-65.14)                                                                        | 56.82<br>(46.73-65.76) | 56.36<br>(46.19-65.92) | 99.88<br>(99.84-99.91)                                                                                           | 99.89<br>(99.85-99.91)   | 99.84<br>(99.79-99.89)   |
| Japan         | 61.62<br>(59.01-64.67)                                                                     | 67.08<br>(64.19-70.42) | 74.22<br>(72.61-75.81)  | 100.00<br>(100.00-100.00)                                                      | 100.00<br>(100.00-100.00) | 100.00<br>(100.00-100.00) | 61.91<br>(54.82-68.03)                                                                        | 61.76<br>(54.27-68.12) | 61.40<br>(53.25-68.21) | 99.96<br>(99.95-99.97)                                                                                           | 99.96<br>(99.95-99.97)   | 99.96<br>(99.95-99.97)   |
| Singapore     | 48.35<br>(46.38-50.42)                                                                     | 52.68<br>(50.73-54.61) | 56.42<br>(54.06-59.03)  | 100.00<br>(100.00-100.00)                                                      | 100.00<br>(100.00-100.00) | 100.00<br>(100.00-100.00) | 61.73<br>(54.55-67.75)                                                                        | 61.81<br>(54.45-68.63) | 61.76<br>(53.86-68.20) | 99.98<br>(99.97-99.99)                                                                                           | 99.98<br>(99.97-99.99)   | 99.94<br>(99.90-99.97)   |
| South Korea   | 33.72<br>(31.86-35.58)                                                                     | 46.05<br>(44.37-47.87) | 50.12<br>(48.25-52.19)  | 51.52<br>(44.04-68.87)                                                         | 59.17<br>(57.40-61.75)    | 80.05<br>(78.03-82.90)    | 46.02<br>(38.33-53.39)                                                                        | 45.87<br>(36.05-54.29) | 46.43<br>(37.13-54.64) | 98.60<br>(98.33-98.85)                                                                                           | 98.67<br>(98.40-98.90)   | 98.58<br>(98.29-98.84)   |
| Andorra       | 70.91<br>(66.87-75.00)                                                                     | 70.87<br>(66.78-75.08) | 70.26<br>(65.78-75.08)  | 100.00<br>(100.00-100.00)                                                      | 100.00<br>(100.00-100.00) | 100.00<br>(100.00-100.00) | 81.45<br>(71.46-88.55)                                                                        | 81.42<br>(70.91-89.12) | 81.23<br>(69.98-89.04) | 99.98<br>(99.98-99.99)                                                                                           | 99.99<br>(99.98-99.99)   | 99.97<br>(99.96-99.98)   |
| Austria       | 67.21<br>(64.43-69.91)                                                                     | 75.65<br>(73.65-77.71) | 81.94<br>(79.29-84.23)  | 100.00<br>(100.00-100.00)                                                      | 100.00<br>(100.00-100.00) | 100.00<br>(100.00-100.00) | 81.50<br>(71.53-88.61)                                                                        | 81.45<br>(70.96-89.14) | 81.27<br>(69.99-89.08) | 99.99<br>(99.99-99.99)                                                                                           | 99.99<br>(99.99-99.99)   | 99.99<br>(99.99-99.99)   |
| Belgium       | 71.59<br>(68.64-74.33)                                                                     | 76.78<br>(74.85-78.63) | 81.18<br>(78.91-83.46)  | 100.00<br>(100.00-100.00)                                                      | 100.00<br>(100.00-100.00) | 100.00<br>(100.00-100.00) | 83.49<br>(78.27-87.32)                                                                        | 83.57<br>(78.35-87.47) | 83.35<br>(77.60-87.76) | 99.99<br>(99.99-99.99)                                                                                           | 99.99<br>(99.99-99.99)   | 99.99<br>(99.99-100.00)  |

**Appendix Table 1a. Scaled values for each SDG health-related indicator and three summary indicators by country for 1990, 2000, and 2015**

| Location   | Indicator 3.3.2: Age-standardised rate of new and relapsed TB cases (per 1,000 population) |                        |                        | Indicator 3.3.3: Age-standardised rate of malaria cases (per 1,000 population) |                           |                           | Indicator 3.3.4: Age-standardised rate of hepatitis B incident cases (per 100,000 population) |                        |                        | Indicator 3.3.5: Age-standardised prevalence rate of neglected tropical diseases (NTDs) (per 100,000 population) |                           |                           |
|------------|--------------------------------------------------------------------------------------------|------------------------|------------------------|--------------------------------------------------------------------------------|---------------------------|---------------------------|-----------------------------------------------------------------------------------------------|------------------------|------------------------|------------------------------------------------------------------------------------------------------------------|---------------------------|---------------------------|
|            | 1990                                                                                       | 2000                   | 2015                   | 1990                                                                           | 2000                      | 2015                      | 1990                                                                                          | 2000                   | 2015                   | 1990                                                                                                             | 2000                      | 2015                      |
| Cyprus     | 85.26<br>(80.79-90.26)                                                                     | 85.85<br>(81.83-90.28) | 85.44<br>(80.95-90.14) | 100.00<br>(100.00-100.00)                                                      | 100.00<br>(100.00-100.00) | 100.00<br>(100.00-100.00) | 81.85<br>(75.98-85.79)                                                                        | 81.76<br>(76.39-85.97) | 81.73<br>(75.70-86.20) | 99.99<br>(99.99-99.99)                                                                                           | 99.99<br>(99.99-99.99)    | 99.99<br>(99.99-99.99)    |
| Denmark    | 76.70<br>(73.77-79.65)                                                                     | 79.13<br>(77.13-81.40) | 85.19<br>(82.45-87.98) | 100.00<br>(100.00-100.00)                                                      | 100.00<br>(100.00-100.00) | 100.00<br>(100.00-100.00) | 82.99<br>(77.35-86.84)                                                                        | 83.06<br>(77.56-87.05) | 82.72<br>(76.63-87.10) | 99.99<br>(99.99-99.99)                                                                                           | 99.99<br>(99.99-99.99)    | 99.99<br>(99.99-99.99)    |
| Finland    | 69.17<br>(66.45-71.74)                                                                     | 76.65<br>(74.40-78.89) | 83.53<br>(80.45-86.31) | 100.00<br>(100.00-100.00)                                                      | 100.00<br>(100.00-100.00) | 100.00<br>(100.00-100.00) | 81.45<br>(71.44-88.58)                                                                        | 81.39<br>(70.88-89.10) | 81.18<br>(69.94-89.04) | 100.00<br>(99.99-100.00)                                                                                         | 100.00<br>(100.00-100.00) | 100.00<br>(100.00-100.00) |
| France     | 52.81<br>(50.11-55.16)                                                                     | 68.64<br>(66.63-70.65) | 79.61<br>(77.13-81.94) | 100.00<br>(100.00-100.00)                                                      | 100.00<br>(100.00-100.00) | 100.00<br>(100.00-100.00) | 83.43<br>(78.20-87.14)                                                                        | 83.52<br>(78.48-87.49) | 83.37<br>(77.43-87.72) | 99.99<br>(99.99-99.99)                                                                                           | 99.99<br>(99.99-99.99)    | 99.99<br>(99.99-99.99)    |
| Germany    | 69.35<br>(66.47-72.03)                                                                     | 78.43<br>(75.72-81.07) | 86.36<br>(83.52-89.04) | 100.00<br>(100.00-100.00)                                                      | 100.00<br>(100.00-100.00) | 100.00<br>(100.00-100.00) | 85.00<br>(79.94-88.62)                                                                        | 85.12<br>(80.18-88.76) | 84.75<br>(79.06-88.80) | 99.99<br>(99.99-99.99)                                                                                           | 99.99<br>(99.99-99.99)    | 99.99<br>(99.99-100.00)   |
| Greece     | 71.02<br>(68.34-73.59)                                                                     | 81.80<br>(80.42-83.23) | 83.66<br>(81.17-86.13) | 100.00<br>(100.00-100.00)                                                      | 100.00<br>(100.00-100.00) | 100.00<br>(100.00-100.00) | 77.15<br>(71.08-81.71)                                                                        | 77.10<br>(71.00-81.96) | 77.16<br>(70.20-82.26) | 99.99<br>(99.99-99.99)                                                                                           | 99.99<br>(99.99-100.00)   | 100.00<br>(99.99-100.00)  |
| Iceland    | 66.97<br>(63.66-70.45)                                                                     | 65.21<br>(62.18-68.40) | 69.11<br>(65.21-73.61) | 100.00<br>(100.00-100.00)                                                      | 100.00<br>(100.00-100.00) | 100.00<br>(100.00-100.00) | 81.35<br>(71.38-88.44)                                                                        | 81.36<br>(70.89-89.05) | 81.30<br>(70.04-89.06) | 99.99<br>(99.99-99.99)                                                                                           | 99.99<br>(99.99-100.00)   | 99.99<br>(99.99-99.99)    |
| Ireland    | 67.31<br>(64.73-69.83)                                                                     | 75.54<br>(73.59-77.29) | 79.83<br>(77.43-82.39) | 100.00<br>(100.00-100.00)                                                      | 100.00<br>(100.00-100.00) | 100.00<br>(100.00-100.00) | 81.42<br>(71.49-88.48)                                                                        | 81.41<br>(70.93-89.12) | 81.39<br>(70.27-89.12) | 99.99<br>(99.99-99.99)                                                                                           | 99.99<br>(99.99-99.99)    | 99.99<br>(99.99-99.99)    |
| Israel     | 75.29<br>(72.13-78.33)                                                                     | 79.15<br>(77.23-80.96) | 82.11<br>(79.21-84.95) | 100.00<br>(100.00-100.00)                                                      | 100.00<br>(100.00-100.00) | 100.00<br>(100.00-100.00) | 81.43<br>(71.47-88.50)                                                                        | 81.49<br>(70.97-89.18) | 81.27<br>(70.03-89.04) | 99.93<br>(99.92-99.94)                                                                                           | 99.94<br>(99.92-99.95)    | 99.95<br>(99.94-99.96)    |
| Italy      | 71.92<br>(69.01-74.62)                                                                     | 81.67<br>(79.19-84.05) | 87.17<br>(84.56-89.85) | 100.00<br>(100.00-100.00)                                                      | 100.00<br>(100.00-100.00) | 100.00<br>(100.00-100.00) | 82.74<br>(77.30-86.60)                                                                        | 82.75<br>(77.49-86.86) | 82.44<br>(76.39-86.92) | 99.99<br>(99.98-99.99)                                                                                           | 99.99<br>(99.99-99.99)    | 99.98<br>(99.98-99.99)    |
| Luxembourg | 73.87<br>(70.68-76.99)                                                                     | 77.06<br>(73.76-80.47) | 76.63<br>(72.30-81.11) | 100.00<br>(100.00-100.00)                                                      | 100.00<br>(100.00-100.00) | 100.00<br>(100.00-100.00) | 81.40<br>(71.40-88.51)                                                                        | 81.39<br>(70.92-89.08) | 81.19<br>(69.88-89.06) | 99.99<br>(99.99-99.99)                                                                                           | 99.99<br>(99.99-99.99)    | 99.99<br>(99.99-99.99)    |

**Appendix Table 1a. Scaled values for each SDG health-related indicator and three summary indicators by country for 1990, 2000, and 2015**

| Location       | Indicator 3.3.2: Age-standardised rate of new and relapsed TB cases (per 1,000 population) |                        |                        | Indicator 3.3.3: Age-standardised rate of malaria cases (per 1,000 population) |                           |                           | Indicator 3.3.4: Age-standardised rate of hepatitis B incident cases (per 100,000 population) |                        |                        | Indicator 3.3.5: Age-standardised prevalence rate of neglected tropical diseases (NTDs) (per 100,000 population) |                           |                           |
|----------------|--------------------------------------------------------------------------------------------|------------------------|------------------------|--------------------------------------------------------------------------------|---------------------------|---------------------------|-----------------------------------------------------------------------------------------------|------------------------|------------------------|------------------------------------------------------------------------------------------------------------------|---------------------------|---------------------------|
|                | 1990                                                                                       | 2000                   | 2015                   | 1990                                                                           | 2000                      | 2015                      | 1990                                                                                          | 2000                   | 2015                   | 1990                                                                                                             | 2000                      | 2015                      |
| Malta          | 76.53<br>(72.61-80.51)                                                                     | 72.96<br>(69.69-76.35) | 72.96<br>(69.13-77.09) | 100.00<br>(100.00-100.00)                                                      | 100.00<br>(100.00-100.00) | 100.00<br>(100.00-100.00) | 81.51<br>(71.52-88.55)                                                                        | 81.40<br>(70.88-89.12) | 81.11<br>(70.00-89.04) | 99.99<br>(99.99-99.99)                                                                                           | 99.99<br>(99.99-99.99)    | 99.99<br>(99.99-99.99)    |
| Netherlands    | 70.10<br>(67.33-72.77)                                                                     | 79.09<br>(76.68-81.32) | 86.21<br>(84.00-88.48) | 100.00<br>(100.00-100.00)                                                      | 100.00<br>(100.00-100.00) | 100.00<br>(100.00-100.00) | 82.99<br>(77.71-86.82)                                                                        | 82.69<br>(77.03-86.78) | 82.62<br>(76.64-87.21) | 99.99<br>(99.99-99.99)                                                                                           | 99.99<br>(99.99-99.99)    | 99.99<br>(99.99-99.99)    |
| Norway         | 74.68<br>(71.82-77.58)                                                                     | 76.74<br>(74.31-79.23) | 81.40<br>(78.83-84.24) | 100.00<br>(100.00-100.00)                                                      | 100.00<br>(100.00-100.00) | 100.00<br>(100.00-100.00) | 81.35<br>(71.33-88.46)                                                                        | 81.34<br>(70.84-89.04) | 81.12<br>(69.86-89.02) | 99.99<br>(99.99-99.99)                                                                                           | 99.99<br>(99.99-99.99)    | 99.99<br>(99.99-99.99)    |
| Portugal       | 50.66<br>(48.26-53.04)                                                                     | 49.93<br>(47.78-52.01) | 64.69<br>(62.61-66.59) | 100.00<br>(100.00-100.00)                                                      | 100.00<br>(100.00-100.00) | 100.00<br>(100.00-100.00) | 81.58<br>(71.68-88.61)                                                                        | 81.50<br>(71.00-89.20) | 81.27<br>(70.04-89.06) | 99.63<br>(99.54-99.71)                                                                                           | 99.64<br>(99.55-99.72)    | 99.66<br>(99.57-99.73)    |
| Spain          | 55.66<br>(53.08-58.00)                                                                     | 66.91<br>(64.79-68.93) | 77.65<br>(75.63-79.47) | 100.00<br>(100.00-100.00)                                                      | 100.00<br>(100.00-100.00) | 100.00<br>(100.00-100.00) | 86.58<br>(81.78-89.86)                                                                        | 86.68<br>(81.67-90.24) | 86.06<br>(80.70-90.00) | 99.96<br>(99.96-99.97)                                                                                           | 99.96<br>(99.95-99.97)    | 99.94<br>(99.93-99.95)    |
| Sweden         | 75.83<br>(72.78-78.98)                                                                     | 81.52<br>(77.93-84.91) | 82.30<br>(78.26-86.54) | 100.00<br>(100.00-100.00)                                                      | 100.00<br>(100.00-100.00) | 100.00<br>(100.00-100.00) | 85.21<br>(80.05-88.71)                                                                        | 85.30<br>(80.21-88.94) | 84.85<br>(79.19-88.86) | 99.99<br>(99.99-99.99)                                                                                           | 99.99<br>(99.99-99.99)    | 99.99<br>(99.99-99.99)    |
| Switzerland    | 73.51<br>(70.67-76.46)                                                                     | 81.84<br>(79.73-84.01) | 83.85<br>(80.97-86.76) | 100.00<br>(100.00-100.00)                                                      | 100.00<br>(100.00-100.00) | 100.00<br>(100.00-100.00) | 82.72<br>(77.01-86.69)                                                                        | 82.76<br>(77.29-86.83) | 82.41<br>(76.47-86.75) | 99.98<br>(99.98-99.99)                                                                                           | 99.98<br>(99.98-99.99)    | 99.98<br>(99.98-99.99)    |
| United Kingdom | 73.71<br>(70.09-77.31)                                                                     | 80.86<br>(78.84-82.80) | 74.37<br>(70.17-78.38) | 100.00<br>(100.00-100.00)                                                      | 100.00<br>(100.00-100.00) | 100.00<br>(100.00-100.00) | 85.28<br>(80.19-88.80)                                                                        | 85.43<br>(80.07-89.07) | 84.69<br>(79.17-88.83) | 100.00<br>(100.00-100.00)                                                                                        | 100.00<br>(100.00-100.00) | 100.00<br>(100.00-100.00) |
| Argentina      | 49.77<br>(47.70-51.86)                                                                     | 50.94<br>(49.05-52.86) | 58.72<br>(56.79-60.64) | 66.25<br>(64.31-69.14)                                                         | 80.96<br>(79.13-83.84)    | 100.00<br>(100.00-100.00) | 73.97<br>(67.66-78.83)                                                                        | 73.96<br>(67.39-79.14) | 73.68<br>(66.63-79.07) | 87.29<br>(84.85-89.38)                                                                                           | 90.81<br>(89.13-92.23)    | 90.79<br>(88.96-92.30)    |
| Chile          | 51.35<br>(49.63-53.31)                                                                     | 56.23<br>(54.62-58.04) | 61.90<br>(60.01-63.80) | 100.00<br>(100.00-100.00)                                                      | 100.00<br>(100.00-100.00) | 100.00<br>(100.00-100.00) | 73.92<br>(67.14-78.85)                                                                        | 73.92<br>(67.46-78.96) | 73.68<br>(66.78-79.00) | 85.48<br>(81.75-88.53)                                                                                           | 89.87<br>(87.81-91.69)    | 86.46<br>(82.88-89.62)    |
| Uruguay        | 58.90<br>(56.90-60.83)                                                                     | 63.04<br>(61.34-64.80) | 67.96<br>(66.20-69.88) | 100.00<br>(100.00-100.00)                                                      | 100.00<br>(100.00-100.00) | 100.00<br>(100.00-100.00) | 73.95<br>(67.18-78.85)                                                                        | 73.94<br>(67.44-78.99) | 73.72<br>(66.82-79.05) | 99.32<br>(99.15-99.45)                                                                                           | 99.40<br>(99.25-99.52)    | 99.65<br>(99.57-99.72)    |

**Appendix Table 1a. Scaled values for each SDG health-related indicator and three summary indicators by country for 1990, 2000, and 2015**

| Location               | Indicator 3.3.2: Age-standardised rate of new and relapsed TB cases (per 1,000 population) |                        |                        | Indicator 3.3.3: Age-standardised rate of malaria cases (per 1,000 population) |                           |                           | Indicator 3.3.4: Age-standardised rate of hepatitis B incident cases (per 100,000 population) |                        |                        | Indicator 3.3.5: Age-standardised prevalence rate of neglected tropical diseases (NTDs) (per 100,000 population) |                        |                        |
|------------------------|--------------------------------------------------------------------------------------------|------------------------|------------------------|--------------------------------------------------------------------------------|---------------------------|---------------------------|-----------------------------------------------------------------------------------------------|------------------------|------------------------|------------------------------------------------------------------------------------------------------------------|------------------------|------------------------|
|                        | 1990                                                                                       | 2000                   | 2015                   | 1990                                                                           | 2000                      | 2015                      | 1990                                                                                          | 2000                   | 2015                   | 1990                                                                                                             | 2000                   | 2015                   |
| Belarus                | 56.18<br>(54.41-58.06)                                                                     | 53.83<br>(52.27-55.36) | 54.40<br>(52.42-56.19) | 100.00<br>(100.00-100.00)                                                      | 100.00<br>(100.00-100.00) | 100.00<br>(100.00-100.00) | 48.92<br>(41.30-56.20)                                                                        | 48.95<br>(39.46-57.19) | 48.75<br>(39.53-57.20) | 99.97<br>(99.96-99.98)                                                                                           | 99.98<br>(99.97-99.98) | 99.98<br>(99.97-99.98) |
| Estonia                | 49.86<br>(47.71-52.12)                                                                     | 46.70<br>(44.81-48.79) | 56.13<br>(53.63-58.44) | 100.00<br>(100.00-100.00)                                                      | 100.00<br>(100.00-100.00) | 100.00<br>(100.00-100.00) | 48.89<br>(41.29-56.15)                                                                        | 48.98<br>(39.46-57.23) | 48.74<br>(39.47-57.18) | 99.98<br>(99.97-99.98)                                                                                           | 99.98<br>(99.98-99.98) | 99.98<br>(99.97-99.98) |
| Latvia                 | 47.14<br>(45.08-49.30)                                                                     | 43.90<br>(42.10-45.93) | 54.08<br>(51.97-56.34) | 100.00<br>(100.00-100.00)                                                      | 100.00<br>(100.00-100.00) | 100.00<br>(100.00-100.00) | 48.91<br>(41.31-56.17)                                                                        | 48.97<br>(39.46-57.22) | 48.72<br>(39.43-57.19) | 99.98<br>(99.97-99.98)                                                                                           | 99.98<br>(99.98-99.99) | 99.98<br>(99.98-99.99) |
| Lithuania              | 43.39<br>(41.43-45.70)                                                                     | 43.12<br>(41.34-45.16) | 47.20<br>(45.06-49.27) | 100.00<br>(100.00-100.00)                                                      | 100.00<br>(100.00-100.00) | 100.00<br>(100.00-100.00) | 48.89<br>(41.26-56.12)                                                                        | 48.96<br>(39.49-57.20) | 48.72<br>(39.48-57.22) | 99.97<br>(99.97-99.98)                                                                                           | 99.98<br>(99.97-99.98) | 99.98<br>(99.97-99.98) |
| Moldova                | 51.37<br>(49.23-53.60)                                                                     | 46.97<br>(45.14-48.98) | 48.38<br>(46.29-50.59) | 100.00<br>(100.00-100.00)                                                      | 100.00<br>(100.00-100.00) | 100.00<br>(100.00-100.00) | 48.95<br>(41.31-56.18)                                                                        | 48.97<br>(39.53-57.21) | 48.72<br>(39.49-57.19) | 99.94<br>(99.93-99.95)                                                                                           | 99.95<br>(99.94-99.96) | 99.97<br>(99.97-99.98) |
| Russia                 | 41.41<br>(39.41-43.44)                                                                     | 36.72<br>(34.76-38.74) | 41.43<br>(39.58-43.55) | 100.00<br>(100.00-100.00)                                                      | 100.00<br>(100.00-100.00) | 100.00<br>(100.00-100.00) | 48.91<br>(41.28-56.19)                                                                        | 48.97<br>(39.49-57.22) | 48.78<br>(39.49-57.19) | 99.38<br>(99.25-99.49)                                                                                           | 99.38<br>(99.26-99.49) | 99.37<br>(99.24-99.48) |
| Ukraine                | 44.45<br>(42.41-46.47)                                                                     | 39.10<br>(37.25-41.14) | 40.73<br>(38.84-42.80) | 100.00<br>(100.00-100.00)                                                      | 100.00<br>(100.00-100.00) | 100.00<br>(100.00-100.00) | 48.94<br>(41.35-56.21)                                                                        | 48.98<br>(39.48-57.24) | 48.77<br>(39.53-57.20) | 99.79<br>(99.75-99.83)                                                                                           | 99.80<br>(99.76-99.84) | 99.80<br>(99.75-99.84) |
| Albania                | 76.22<br>(73.32-79.32)                                                                     | 77.71<br>(74.47-81.06) | 74.88<br>(71.09-79.21) | 100.00<br>(100.00-100.00)                                                      | 100.00<br>(100.00-100.00) | 100.00<br>(100.00-100.00) | 66.41<br>(54.63-76.14)                                                                        | 66.44<br>(54.69-75.88) | 66.26<br>(53.17-76.36) | 99.99<br>(99.99-99.99)                                                                                           | 99.99<br>(99.99-99.99) | 99.99<br>(99.99-99.99) |
| Bosnia and Herzegovina | 60.35<br>(58.92-61.71)                                                                     | 62.72<br>(61.00-64.39) | 63.56<br>(60.90-66.00) | 100.00<br>(100.00-100.00)                                                      | 100.00<br>(100.00-100.00) | 100.00<br>(100.00-100.00) | 66.48<br>(54.55-76.23)                                                                        | 66.41<br>(54.68-75.99) | 66.18<br>(53.09-76.27) | 99.97<br>(99.96-99.98)                                                                                           | 99.98<br>(99.98-99.98) | 99.98<br>(99.98-99.99) |
| Bulgaria               | 62.64<br>(59.91-65.23)                                                                     | 57.64<br>(55.09-60.38) | 63.44<br>(61.37-65.84) | 100.00<br>(100.00-100.00)                                                      | 100.00<br>(100.00-100.00) | 100.00<br>(100.00-100.00) | 63.38<br>(56.36-69.24)                                                                        | 63.46<br>(56.31-69.90) | 63.31<br>(55.14-69.93) | 99.98<br>(99.97-99.98)                                                                                           | 99.98<br>(99.97-99.98) | 99.98<br>(99.98-99.99) |
| Croatia                | 49.36<br>(47.22-51.48)                                                                     | 56.13<br>(54.06-58.26) | 69.27<br>(66.82-71.62) | 100.00<br>(100.00-100.00)                                                      | 100.00<br>(100.00-100.00) | 100.00<br>(100.00-100.00) | 66.16<br>(59.48-71.70)                                                                        | 66.06<br>(59.06-72.38) | 65.90<br>(58.24-72.33) | 99.98<br>(99.98-99.98)                                                                                           | 99.98<br>(99.98-99.98) | 99.98<br>(99.98-99.99) |

**Appendix Table 1a. Scaled values for each SDG health-related indicator and three summary indicators by country for 1990, 2000, and 2015**

| Location       | Indicator 3.3.2: Age-standardised rate of new and relapsed TB cases (per 1,000 population) |                        |                        | Indicator 3.3.3: Age-standardised rate of malaria cases (per 1,000 population) |                           |                           | Indicator 3.3.4: Age-standardised rate of hepatitis B incident cases (per 100,000 population) |                        |                        | Indicator 3.3.5: Age-standardised prevalence rate of neglected tropical diseases (NTDs) (per 100,000 population) |                        |                        |
|----------------|--------------------------------------------------------------------------------------------|------------------------|------------------------|--------------------------------------------------------------------------------|---------------------------|---------------------------|-----------------------------------------------------------------------------------------------|------------------------|------------------------|------------------------------------------------------------------------------------------------------------------|------------------------|------------------------|
|                | 1990                                                                                       | 2000                   | 2015                   | 1990                                                                           | 2000                      | 2015                      | 1990                                                                                          | 2000                   | 2015                   | 1990                                                                                                             | 2000                   | 2015                   |
| Czech Republic | 68.77<br>(66.18-71.33)                                                                     | 74.88<br>(72.90-76.85) | 80.51<br>(77.48-83.36) | 100.00<br>(100.00-100.00)                                                      | 100.00<br>(100.00-100.00) | 100.00<br>(100.00-100.00) | 66.52<br>(54.64-76.23)                                                                        | 66.45<br>(54.73-76.00) | 66.20<br>(53.07-76.26) | 99.99<br>(99.98-99.99)                                                                                           | 99.99<br>(99.99-99.99) | 99.99<br>(99.98-99.99) |
| Hungary        | 55.88<br>(53.75-58.05)                                                                     | 63.56<br>(61.66-65.56) | 74.71<br>(71.85-77.17) | 100.00<br>(100.00-100.00)                                                      | 100.00<br>(100.00-100.00) | 100.00<br>(100.00-100.00) | 66.54<br>(54.84-76.26)                                                                        | 66.49<br>(54.75-76.03) | 66.25<br>(53.10-76.31) | 99.98<br>(99.97-99.98)                                                                                           | 99.98<br>(99.98-99.99) | 99.99<br>(99.98-99.99) |
| Macedonia      | 55.74<br>(54.29-57.21)                                                                     | 60.79<br>(59.40-62.18) | 67.90<br>(65.55-70.14) | 100.00<br>(100.00-100.00)                                                      | 100.00<br>(100.00-100.00) | 100.00<br>(100.00-100.00) | 66.46<br>(54.61-76.19)                                                                        | 66.42<br>(54.66-75.92) | 66.21<br>(53.15-76.30) | 99.98<br>(99.98-99.98)                                                                                           | 99.99<br>(99.98-99.99) | 99.99<br>(99.98-99.99) |
| Montenegro     | 74.12<br>(71.14-77.23)                                                                     | 76.68<br>(73.33-80.14) | 74.19<br>(70.72-77.97) | 100.00<br>(100.00-100.00)                                                      | 100.00<br>(100.00-100.00) | 100.00<br>(100.00-100.00) | 66.48<br>(54.58-76.22)                                                                        | 66.46<br>(54.74-76.00) | 66.22<br>(53.15-76.30) | 99.98<br>(99.97-99.98)                                                                                           | 99.98<br>(99.98-99.98) | 99.98<br>(99.98-99.99) |
| Poland         | 52.47<br>(50.44-54.60)                                                                     | 60.78<br>(58.91-62.60) | 67.62<br>(65.46-69.62) | 100.00<br>(100.00-100.00)                                                      | 100.00<br>(100.00-100.00) | 100.00<br>(100.00-100.00) | 78.02<br>(71.83-82.44)                                                                        | 78.17<br>(72.19-82.74) | 77.66<br>(71.03-82.74) | 99.98<br>(99.98-99.99)                                                                                           | 99.99<br>(99.99-99.99) | 99.99<br>(99.99-99.99) |
| Romania        | 43.98<br>(42.00-46.06)                                                                     | 39.10<br>(37.25-41.09) | 46.27<br>(44.21-48.29) | 100.00<br>(100.00-100.00)                                                      | 100.00<br>(100.00-100.00) | 100.00<br>(100.00-100.00) | 66.50<br>(54.61-76.19)                                                                        | 66.45<br>(54.70-76.02) | 66.22<br>(53.13-76.29) | 99.96<br>(99.96-99.97)                                                                                           | 99.98<br>(99.97-99.98) | 99.98<br>(99.98-99.98) |
| Serbia         | 65.49<br>(63.52-67.39)                                                                     | 68.69<br>(66.45-71.04) | 69.65<br>(67.24-72.23) | 100.00<br>(100.00-100.00)                                                      | 100.00<br>(100.00-100.00) | 100.00<br>(100.00-100.00) | 66.50<br>(54.56-76.20)                                                                        | 66.46<br>(54.78-75.98) | 66.23<br>(53.14-76.31) | 99.94<br>(99.93-99.95)                                                                                           | 99.96<br>(99.95-99.97) | 99.98<br>(99.97-99.98) |
| Slovakia       | 70.33<br>(67.58-73.04)                                                                     | 74.38<br>(71.46-77.31) | 76.80<br>(72.72-81.09) | 100.00<br>(100.00-100.00)                                                      | 100.00<br>(100.00-100.00) | 100.00<br>(100.00-100.00) | 66.53<br>(54.77-76.25)                                                                        | 66.48<br>(54.76-76.03) | 66.24<br>(53.09-76.31) | 99.99<br>(99.98-99.99)                                                                                           | 99.99<br>(99.99-99.99) | 99.99<br>(99.99-99.99) |
| Slovenia       | 60.79<br>(58.47-63.11)                                                                     | 69.71<br>(67.57-71.96) | 75.42<br>(72.33-78.51) | 100.00<br>(100.00-100.00)                                                      | 100.00<br>(100.00-100.00) | 100.00<br>(100.00-100.00) | 66.53<br>(54.58-76.28)                                                                        | 66.44<br>(54.74-75.99) | 66.17<br>(53.07-76.25) | 99.97<br>(99.97-99.98)                                                                                           | 99.98<br>(99.98-99.99) | 99.99<br>(99.98-99.99) |
| Armenia        | 64.12<br>(62.09-66.09)                                                                     | 62.79<br>(61.07-64.46) | 60.23<br>(57.96-62.36) | 33.21<br>(26.02-52.45)                                                         | 100.00<br>(100.00-100.00) | 100.00<br>(100.00-100.00) | 41.32<br>(31.77-50.46)                                                                        | 41.33<br>(29.71-52.18) | 40.97<br>(30.26-51.51) | 99.51<br>(99.28-99.67)                                                                                           | 99.75<br>(99.69-99.81) | 99.55<br>(99.39-99.66) |
| Azerbaijan     | 40.44<br>(38.89-41.95)                                                                     | 40.14<br>(38.52-41.54) | 44.69<br>(42.76-46.40) | 38.94<br>(31.65-56.28)                                                         | 53.33<br>(51.55-55.73)    | 100.00<br>(100.00-100.00) | 41.33<br>(31.71-50.51)                                                                        | 41.25<br>(29.81-52.16) | 40.82<br>(30.30-51.26) | 97.39<br>(96.10-98.27)                                                                                           | 98.84<br>(98.55-99.14) | 98.19<br>(97.26-98.77) |

**Appendix Table 1a. Scaled values for each SDG health-related indicator and three summary indicators by country for 1990, 2000, and 2015**

| Location     | Indicator 3.3.2: Age-standardised rate of new and relapsed TB cases (per 1,000 population) |                        |                        | Indicator 3.3.3: Age-standardised rate of malaria cases (per 1,000 population) |                           |                           | Indicator 3.3.4: Age-standardised rate of hepatitis B incident cases (per 100,000 population) |                        |                        | Indicator 3.3.5: Age-standardised prevalence rate of neglected tropical diseases (NTDs) (per 100,000 population) |                        |                        |
|--------------|--------------------------------------------------------------------------------------------|------------------------|------------------------|--------------------------------------------------------------------------------|---------------------------|---------------------------|-----------------------------------------------------------------------------------------------|------------------------|------------------------|------------------------------------------------------------------------------------------------------------------|------------------------|------------------------|
|              | 1990                                                                                       | 2000                   | 2015                   | 1990                                                                           | 2000                      | 2015                      | 1990                                                                                          | 2000                   | 2015                   | 1990                                                                                                             | 2000                   | 2015                   |
| Georgia      | 49.01<br>(47.20-50.72)                                                                     | 54.57<br>(52.95-56.22) | 53.84<br>(51.84-55.59) | 34.77<br>(27.51-51.56)                                                         | 64.53<br>(62.65-67.29)    | 100.00<br>(100.00-100.00) | 41.33<br>(31.74-50.51)                                                                        | 41.25<br>(29.73-52.22) | 40.84<br>(30.29-51.27) | 99.58<br>(99.36-99.71)                                                                                           | 99.78<br>(99.73-99.83) | 99.62<br>(99.44-99.73) |
| Kazakhstan   | 31.84<br>(29.90-33.80)                                                                     | 31.38<br>(29.60-33.25) | 36.83<br>(34.77-38.87) | 100.00<br>(100.00-100.00)                                                      | 100.00<br>(100.00-100.00) | 100.00<br>(100.00-100.00) | 41.31<br>(31.62-50.62)                                                                        | 41.25<br>(29.71-52.24) | 40.88<br>(30.34-51.37) | 86.47<br>(82.16-90.01)                                                                                           | 91.69<br>(89.82-93.45) | 87.66<br>(82.77-91.67) |
| Kyrgyzstan   | 46.56<br>(44.88-48.19)                                                                     | 43.86<br>(42.33-45.38) | 49.16<br>(47.63-50.68) | 34.48<br>(27.53-51.06)                                                         | 96.03<br>(95.27-97.07)    | 100.00<br>(100.00-100.00) | 41.30<br>(31.60-50.56)                                                                        | 41.20<br>(29.77-52.25) | 40.84<br>(30.29-51.34) | 85.86<br>(80.33-89.95)                                                                                           | 91.77<br>(89.92-93.57) | 87.31<br>(82.22-91.06) |
| Mongolia     | 37.21<br>(35.58-38.68)                                                                     | 38.73<br>(37.17-40.14) | 40.73<br>(39.13-42.31) | 100.00<br>(100.00-100.00)                                                      | 100.00<br>(100.00-100.00) | 100.00<br>(100.00-100.00) | 41.01<br>(33.60-48.90)                                                                        | 40.87<br>(31.49-49.78) | 40.94<br>(30.82-49.68) | 99.77<br>(99.73-99.81)                                                                                           | 99.84<br>(99.81-99.87) | 99.83<br>(99.79-99.86) |
| Tajikistan   | 48.91<br>(47.14-50.63)                                                                     | 48.24<br>(46.67-49.70) | 52.42<br>(50.53-54.20) | 33.40<br>(28.13-42.24)                                                         | 30.48<br>(29.00-32.22)    | 100.00<br>(100.00-100.00) | 41.26<br>(31.67-50.41)                                                                        | 41.17<br>(29.76-52.18) | 40.79<br>(30.14-51.27) | 94.21<br>(92.20-95.81)                                                                                           | 96.76<br>(96.01-97.50) | 94.86<br>(92.65-96.43) |
| Turkmenistan | 42.62<br>(40.90-44.25)                                                                     | 40.80<br>(39.15-42.41) | 45.76<br>(44.16-47.54) | 55.96<br>(49.49-69.44)                                                         | 100.00<br>(100.00-100.00) | 100.00<br>(100.00-100.00) | 41.29<br>(31.62-50.49)                                                                        | 41.20<br>(29.75-52.25) | 40.86<br>(30.32-51.39) | 98.11<br>(97.30-98.72)                                                                                           | 98.99<br>(98.75-99.24) | 98.23<br>(97.40-98.81) |
| Uzbekistan   | 48.75<br>(47.15-50.23)                                                                     | 45.75<br>(44.21-47.17) | 50.06<br>(48.47-51.75) | 48.94<br>(41.02-69.96)                                                         | 95.07<br>(94.16-96.33)    | 100.00<br>(100.00-100.00) | 42.95<br>(35.23-50.94)                                                                        | 42.98<br>(33.52-51.53) | 42.99<br>(33.30-51.43) | 99.84<br>(99.79-99.88)                                                                                           | 99.91<br>(99.89-99.92) | 99.85<br>(99.80-99.88) |
| Colombia     | 52.21<br>(50.55-54.00)                                                                     | 54.48<br>(53.03-56.11) | 63.22<br>(61.57-65.05) | 29.60<br>(27.27-32.59)                                                         | 31.36<br>(29.70-33.32)    | 31.92<br>(30.24-34.08)    | 70.79<br>(63.83-76.23)                                                                        | 70.73<br>(63.90-76.40) | 69.78<br>(62.16-76.00) | 73.80<br>(68.42-78.14)                                                                                           | 79.15<br>(75.14-82.53) | 74.29<br>(69.13-78.69) |
| Costa Rica   | 60.40<br>(58.77-62.05)                                                                     | 63.59<br>(62.01-65.26) | 73.20<br>(71.29-75.07) | 47.52<br>(45.82-49.80)                                                         | 44.54<br>(42.96-46.57)    | 95.18<br>(94.37-96.38)    | 71.91<br>(57.09-82.75)                                                                        | 72.30<br>(58.31-83.11) | 72.25<br>(57.37-83.31) | 79.24<br>(73.97-83.65)                                                                                           | 88.17<br>(85.41-90.77) | 79.92<br>(74.75-84.08) |
| El Salvador  | 57.72<br>(56.59-58.85)                                                                     | 66.03<br>(64.65-67.32) | 69.08<br>(66.53-71.49) | 34.60<br>(33.00-36.46)                                                         | 57.81<br>(55.92-60.51)    | 93.91<br>(92.94-95.39)    | 72.02<br>(57.05-82.85)                                                                        | 72.42<br>(58.44-83.33) | 72.43<br>(57.77-83.50) | 78.40<br>(73.60-82.57)                                                                                           | 83.44<br>(80.32-86.27) | 92.22<br>(89.90-94.07) |
| Guatemala    | 34.20<br>(32.56-35.98)                                                                     | 46.66<br>(44.96-48.38) | 59.70<br>(57.56-61.88) | 25.24<br>(21.88-30.73)                                                         | 31.60<br>(29.59-33.99)    | 34.10<br>(32.30-36.36)    | 71.97<br>(57.05-82.81)                                                                        | 72.39<br>(58.45-83.32) | 72.35<br>(57.47-83.38) | 55.30<br>(46.94-62.28)                                                                                           | 62.71<br>(56.08-68.63) | 70.99<br>(64.68-76.10) |

**Appendix Table 1a. Scaled values for each SDG health-related indicator and three summary indicators by country for 1990, 2000, and 2015**

| Location            | Indicator 3.3.2: Age-standardised rate of new and relapsed TB cases (per 1,000 population) |                        |                        | Indicator 3.3.3: Age-standardised rate of malaria cases (per 1,000 population) |                           |                           | Indicator 3.3.4: Age-standardised rate of hepatitis B incident cases (per 100,000 population) |                         |                        | Indicator 3.3.5: Age-standardised prevalence rate of neglected tropical diseases (NTDs) (per 100,000 population) |                        |                        |
|---------------------|--------------------------------------------------------------------------------------------|------------------------|------------------------|--------------------------------------------------------------------------------|---------------------------|---------------------------|-----------------------------------------------------------------------------------------------|-------------------------|------------------------|------------------------------------------------------------------------------------------------------------------|------------------------|------------------------|
|                     | 1990                                                                                       | 2000                   | 2015                   | 1990                                                                           | 2000                      | 2015                      | 1990                                                                                          | 2000                    | 2015                   | 1990                                                                                                             | 2000                   | 2015                   |
| Honduras            | 49.46<br>(48.20-50.59)                                                                     | 50.33<br>(49.21-51.45) | 55.43<br>(54.08-56.74) | 36.29<br>(33.68-39.68)                                                         | 38.19<br>(36.27-40.51)    | 37.95<br>(36.35-40.13)    | 71.93<br>(57.06-82.75)                                                                        | 72.31<br>(58.38-83.18)  | 72.27<br>(57.40-83.30) | 67.75<br>(60.53-73.97)                                                                                           | 78.01<br>(73.36-82.21) | 74.63<br>(68.43-79.59) |
| Mexico              | 51.89<br>(50.06-53.89)                                                                     | 56.54<br>(54.44-58.69) | 65.63<br>(64.10-67.23) | 29.07<br>(27.21-31.26)                                                         | 64.13<br>(62.22-67.03)    | 76.78<br>(74.90-79.77)    | 99.08<br>(97.04-100.00)                                                                       | 99.14<br>(97.13-100.00) | 96.82<br>(93.98-98.97) | 85.92<br>(83.36-88.04)                                                                                           | 88.39<br>(86.31-90.16) | 88.23<br>(86.14-90.11) |
| Nicaragua           | 52.01<br>(50.87-53.18)                                                                     | 58.89<br>(57.76-59.99) | 65.53<br>(63.66-67.30) | 28.05<br>(24.75-33.32)                                                         | 34.15<br>(32.26-36.49)    | 36.64<br>(34.73-39.02)    | 73.96<br>(67.68-78.72)                                                                        | 73.92<br>(67.83-79.01)  | 73.93<br>(67.00-79.50) | 82.38<br>(78.44-85.75)                                                                                           | 86.43<br>(83.84-88.89) | 93.24<br>(90.90-95.08) |
| Panama              | 47.64<br>(46.35-48.96)                                                                     | 50.55<br>(49.28-51.84) | 52.01<br>(50.71-53.22) | 56.26<br>(54.43-58.78)                                                         | 48.14<br>(46.50-50.32)    | 51.49<br>(49.74-53.75)    | 71.91<br>(57.12-82.75)                                                                        | 72.29<br>(58.32-83.08)  | 72.25<br>(57.38-83.29) | 71.70<br>(66.04-76.49)                                                                                           | 93.73<br>(92.49-94.87) | 93.19<br>(91.17-95.02) |
| Venezuela           | 48.68<br>(47.01-50.49)                                                                     | 54.80<br>(53.35-56.45) | 61.97<br>(60.22-63.57) | 39.00<br>(36.72-41.84)                                                         | 39.32<br>(37.33-41.80)    | 40.08<br>(38.42-42.41)    | 71.92<br>(57.10-82.74)                                                                        | 72.31<br>(58.30-83.13)  | 72.28<br>(57.40-83.33) | 69.15<br>(63.66-73.96)                                                                                           | 71.60<br>(66.69-76.05) | 70.72<br>(63.98-76.82) |
| Bolivia             | 38.13<br>(36.89-39.35)                                                                     | 44.26<br>(43.03-45.60) | 49.92<br>(48.39-51.31) | 52.42<br>(49.98-55.51)                                                         | 52.97<br>(50.88-55.59)    | 52.24<br>(50.28-54.99)    | 69.56<br>(62.41-75.18)                                                                        | 69.63<br>(62.44-75.56)  | 69.50<br>(61.94-75.71) | 80.04<br>(75.96-83.84)                                                                                           | 87.03<br>(84.42-89.24) | 82.38<br>(78.59-85.68) |
| Ecuador             | 36.38<br>(35.07-37.70)                                                                     | 43.14<br>(41.77-44.52) | 51.47<br>(49.85-52.84) | 24.10<br>(22.78-25.81)                                                         | 22.56<br>(21.35-24.18)    | 70.71<br>(68.82-73.62)    | 69.56<br>(62.46-75.21)                                                                        | 69.63<br>(62.44-75.57)  | 69.50<br>(61.94-75.71) | 65.44<br>(58.42-71.64)                                                                                           | 72.63<br>(67.59-77.17) | 71.22<br>(64.13-76.78) |
| Peru                | 27.93<br>(26.66-29.23)                                                                     | 38.47<br>(37.11-39.75) | 47.02<br>(44.92-48.85) | 41.61<br>(38.95-45.07)                                                         | 42.86<br>(40.95-45.22)    | 42.59<br>(40.66-45.09)    | 69.61<br>(62.51-75.23)                                                                        | 69.65<br>(62.47-75.59)  | 69.49<br>(61.95-75.71) | 76.98<br>(72.14-81.30)                                                                                           | 83.85<br>(80.76-86.88) | 84.42<br>(80.40-87.67) |
| Antigua and Barbuda | 62.15<br>(59.54-64.60)                                                                     | 61.12<br>(58.72-63.58) | 62.64<br>(59.03-66.20) | 100.00<br>(100.00-100.00)                                                      | 100.00<br>(100.00-100.00) | 100.00<br>(100.00-100.00) | 76.03<br>(69.83-80.64)                                                                        | 76.13<br>(70.06-80.83)  | 75.95<br>(69.23-80.89) | 99.77<br>(99.68-99.84)                                                                                           | 99.82<br>(99.73-99.87) | 99.70<br>(99.59-99.79) |
| The Bahamas         | 52.23<br>(50.80-53.61)                                                                     | 54.74<br>(53.27-56.07) | 62.61<br>(60.50-64.65) | 100.00<br>(100.00-100.00)                                                      | 100.00<br>(100.00-100.00) | 100.00<br>(100.00-100.00) | 76.00<br>(69.79-80.60)                                                                        | 76.06<br>(69.84-80.74)  | 75.89<br>(69.21-80.87) | 99.85<br>(99.82-99.88)                                                                                           | 99.89<br>(99.87-99.92) | 99.86<br>(99.82-99.89) |
| Barbados            | 66.93<br>(64.20-69.39)                                                                     | 66.03<br>(63.65-68.54) | 66.80<br>(63.18-70.43) | 100.00<br>(100.00-100.00)                                                      | 100.00<br>(100.00-100.00) | 100.00<br>(100.00-100.00) | 76.04<br>(69.83-80.59)                                                                        | 76.05<br>(69.82-80.76)  | 75.91<br>(69.21-80.88) | 99.86<br>(99.83-99.89)                                                                                           | 99.86<br>(99.82-99.89) | 99.74<br>(99.63-99.81) |

**Appendix Table 1a. Scaled values for each SDG health-related indicator and three summary indicators by country for 1990, 2000, and 2015**

| Location                         | Indicator 3.3.2: Age-standardised rate of new and relapsed TB cases (per 1,000 population) |                        |                        | Indicator 3.3.3: Age-standardised rate of malaria cases (per 1,000 population) |                           |                           | Indicator 3.3.4: Age-standardised rate of hepatitis B incident cases (per 100,000 population) |                        |                        | Indicator 3.3.5: Age-standardised prevalence rate of neglected tropical diseases (NTDs) (per 100,000 population) |                        |                        |
|----------------------------------|--------------------------------------------------------------------------------------------|------------------------|------------------------|--------------------------------------------------------------------------------|---------------------------|---------------------------|-----------------------------------------------------------------------------------------------|------------------------|------------------------|------------------------------------------------------------------------------------------------------------------|------------------------|------------------------|
|                                  | 1990                                                                                       | 2000                   | 2015                   | 1990                                                                           | 2000                      | 2015                      | 1990                                                                                          | 2000                   | 2015                   | 1990                                                                                                             | 2000                   | 2015                   |
| Belize                           | 53.14<br>(51.94-54.36)                                                                     | 47.36<br>(46.04-48.82) | 52.05<br>(50.65-53.39) | 18.94<br>(17.62-20.49)                                                         | 25.30<br>(23.97-26.96)    | 59.77<br>(57.95-62.40)    | 75.94<br>(69.68-80.56)                                                                        | 75.98<br>(69.68-80.69) | 75.86<br>(69.21-80.80) | 85.23<br>(81.26-88.66)                                                                                           | 91.82<br>(89.98-93.64) | 95.91<br>(94.72-96.93) |
| Cuba                             | 75.44<br>(72.18-78.43)                                                                     | 77.02<br>(74.75-79.30) | 79.29<br>(76.63-82.00) | 100.00<br>(100.00-100.00)                                                      | 100.00<br>(100.00-100.00) | 100.00<br>(100.00-100.00) | 75.94<br>(69.65-80.55)                                                                        | 75.97<br>(69.65-80.68) | 75.81<br>(69.21-80.79) | 84.52<br>(81.80-87.08)                                                                                           | 86.56<br>(84.14-88.64) | 84.46<br>(81.46-87.04) |
| Dominica                         | 56.37<br>(55.00-57.68)                                                                     | 56.55<br>(55.21-57.84) | 58.59<br>(56.83-60.25) | 100.00<br>(100.00-100.00)                                                      | 100.00<br>(100.00-100.00) | 100.00<br>(100.00-100.00) | 75.98<br>(69.77-80.61)                                                                        | 76.01<br>(69.77-80.69) | 75.86<br>(69.21-80.86) | 84.59<br>(80.60-88.12)                                                                                           | 99.85<br>(99.82-99.88) | 99.89<br>(99.84-99.92) |
| Dominican Republic               | 41.13<br>(39.70-42.51)                                                                     | 44.12<br>(42.82-45.48) | 49.79<br>(48.34-51.26) | 34.35<br>(32.77-36.47)                                                         | 35.41<br>(33.50-37.80)    | 35.58<br>(33.57-38.03)    | 75.94<br>(69.69-80.57)                                                                        | 75.99<br>(69.75-80.68) | 75.86<br>(69.21-80.84) | 97.97<br>(95.73-99.12)                                                                                           | 97.98<br>(95.74-99.13) | 97.96<br>(95.72-99.13) |
| Grenada                          | 69.32<br>(67.43-71.31)                                                                     | 68.39<br>(66.45-70.48) | 67.51<br>(64.56-70.20) | 100.00<br>(100.00-100.00)                                                      | 100.00<br>(100.00-100.00) | 100.00<br>(100.00-100.00) | 76.00<br>(69.79-80.58)                                                                        | 76.01<br>(69.76-80.74) | 75.84<br>(69.18-80.83) | 61.70<br>(54.50-68.38)                                                                                           | 87.74<br>(85.41-89.71) | 83.56<br>(79.34-87.11) |
| Guyana                           | 47.96<br>(46.66-49.21)                                                                     | 42.15<br>(40.84-43.55) | 43.10<br>(41.82-44.43) | 17.24<br>(15.04-20.15)                                                         | 16.70<br>(14.45-19.71)    | 19.18<br>(17.79-20.85)    | 76.00<br>(69.80-80.63)                                                                        | 75.99<br>(69.68-80.73) | 75.82<br>(69.20-80.85) | 81.41<br>(76.11-85.76)                                                                                           | 90.04<br>(87.72-92.10) | 87.37<br>(83.91-90.23) |
| Haiti                            | 41.53<br>(40.22-42.82)                                                                     | 44.93<br>(43.71-46.21) | 50.80<br>(49.54-51.95) | 19.08<br>(16.90-21.97)                                                         | 20.60<br>(18.73-22.89)    | 22.73<br>(21.28-24.45)    | 76.03<br>(69.77-80.66)                                                                        | 76.05<br>(69.86-80.72) | 75.90<br>(69.19-80.86) | 60.63<br>(53.75-66.69)                                                                                           | 76.91<br>(72.61-80.61) | 95.09<br>(93.86-96.16) |
| Jamaica                          | 76.46<br>(73.98-78.95)                                                                     | 77.08<br>(74.90-79.31) | 80.98<br>(77.35-84.72) | 100.00<br>(100.00-100.00)                                                      | 100.00<br>(100.00-100.00) | 100.00<br>(100.00-100.00) | 76.01<br>(69.60-80.62)                                                                        | 75.97<br>(69.70-80.84) | 75.63<br>(68.94-80.74) | 71.33<br>(66.00-75.94)                                                                                           | 75.38<br>(70.83-79.14) | 63.94<br>(57.30-69.70) |
| Saint Lucia                      | 49.83<br>(48.08-51.60)                                                                     | 48.57<br>(46.82-50.38) | 56.75<br>(54.67-58.92) | 100.00<br>(100.00-100.00)                                                      | 100.00<br>(100.00-100.00) | 100.00<br>(100.00-100.00) | 76.00<br>(69.82-80.66)                                                                        | 76.04<br>(69.86-80.68) | 75.89<br>(69.23-80.86) | 55.00<br>(46.22-62.00)                                                                                           | 78.51<br>(74.51-82.10) | 77.21<br>(71.35-81.68) |
| Saint Vincent and the Grenadines | 54.96<br>(53.15-56.71)                                                                     | 51.53<br>(49.77-53.38) | 55.91<br>(53.62-58.23) | 100.00<br>(100.00-100.00)                                                      | 100.00<br>(100.00-100.00) | 100.00<br>(100.00-100.00) | 75.98<br>(69.75-80.59)                                                                        | 75.96<br>(69.63-80.70) | 75.82<br>(69.22-80.79) | 72.39<br>(65.93-77.94)                                                                                           | 91.67<br>(89.92-93.28) | 84.99<br>(80.91-88.38) |
| Suriname                         | 60.50<br>(58.84-62.14)                                                                     | 58.28<br>(56.90-59.76) | 61.79<br>(59.68-63.78) | 25.64<br>(22.03-31.54)                                                         | 24.18<br>(20.20-30.83)    | 33.42<br>(30.37-37.86)    | 75.94<br>(69.63-80.54)                                                                        | 75.97<br>(69.59-80.73) | 75.85<br>(69.21-80.86) | 94.76<br>(93.58-95.74)                                                                                           | 95.57<br>(94.53-96.42) | 94.38<br>(92.94-95.55) |

**Appendix Table 1a. Scaled values for each SDG health-related indicator and three summary indicators by country for 1990, 2000, and 2015**

| Location            | Indicator 3.3.2: Age-standardised rate of new and relapsed TB cases (per 1,000 population) |                        |                        | Indicator 3.3.3: Age-standardised rate of malaria cases (per 1,000 population) |                           |                           | Indicator 3.3.4: Age-standardised rate of hepatitis B incident cases (per 100,000 population) |                        |                        | Indicator 3.3.5: Age-standardised prevalence rate of neglected tropical diseases (NTDs) (per 100,000 population) |                        |                        |
|---------------------|--------------------------------------------------------------------------------------------|------------------------|------------------------|--------------------------------------------------------------------------------|---------------------------|---------------------------|-----------------------------------------------------------------------------------------------|------------------------|------------------------|------------------------------------------------------------------------------------------------------------------|------------------------|------------------------|
|                     | 1990                                                                                       | 2000                   | 2015                   | 1990                                                                           | 2000                      | 2015                      | 1990                                                                                          | 2000                   | 2015                   | 1990                                                                                                             | 2000                   | 2015                   |
| Trinidad and Tobago | 55.61<br>(53.61-57.66)                                                                     | 55.62<br>(53.79-57.56) | 62.00<br>(59.73-64.25) | 100.00<br>(100.00-100.00)                                                      | 100.00<br>(100.00-100.00) | 100.00<br>(100.00-100.00) | 75.98<br>(69.76-80.59)                                                                        | 76.00<br>(69.69-80.73) | 75.87<br>(69.23-80.85) | 97.60<br>(97.03-98.09)                                                                                           | 98.21<br>(97.85-98.53) | 97.53<br>(96.95-98.04) |
| Brazil              | 53.87<br>(51.46-55.97)                                                                     | 55.51<br>(53.04-57.58) | 58.19<br>(56.68-59.92) | 32.60<br>(29.31-37.74)                                                         | 37.54<br>(35.76-39.74)    | 37.33<br>(35.56-39.62)    | 62.81<br>(55.93-68.75)                                                                        | 62.62<br>(55.22-68.91) | 61.67<br>(53.64-68.36) | 86.26<br>(83.49-88.69)                                                                                           | 91.44<br>(89.83-92.86) | 86.68<br>(83.97-89.06) |
| Paraguay            | 54.49<br>(53.21-55.72)                                                                     | 54.82<br>(53.54-56.02) | 55.93<br>(54.58-57.19) | 64.23<br>(57.35-78.12)                                                         | 66.92<br>(59.96-80.73)    | 69.24<br>(62.26-82.88)    | 62.43<br>(55.47-68.48)                                                                        | 62.43<br>(55.22-68.70) | 62.14<br>(54.00-68.77) | 86.80<br>(83.83-89.30)                                                                                           | 90.87<br>(88.92-92.50) | 87.76<br>(85.14-90.11) |
| China               | 40.32<br>(38.13-42.22)                                                                     | 42.29<br>(40.31-44.12) | 44.88<br>(43.21-46.37) | 67.41<br>(64.34-71.01)                                                         | 71.06<br>(69.12-73.98)    | 93.77<br>(92.76-95.20)    | 5.27<br>(0.00-17.77)                                                                          | 26.39<br>(14.73-36.35) | 39.75<br>(29.50-48.54) | 64.61<br>(58.20-70.07)                                                                                           | 86.24<br>(83.68-88.36) | 88.66<br>(86.43-90.45) |
| North Korea         | 46.99<br>(45.25-48.54)                                                                     | 45.67<br>(44.22-47.03) | 49.98<br>(48.19-51.59) | 34.02<br>(31.53-36.92)                                                         | 26.56<br>(25.24-28.08)    | 37.88<br>(36.40-39.73)    | 15.57<br>(8.85-26.22)                                                                         | 15.47<br>(2.50-27.07)  | 15.00<br>(0.00-26.90)  | 84.65<br>(78.87-88.93)                                                                                           | 90.12<br>(88.11-92.02) | 93.91<br>(90.94-95.81) |
| Taiwan              | 55.91<br>(53.83-57.84)                                                                     | 57.56<br>(54.98-59.97) | 59.90<br>(57.49-62.22) | 100.00<br>(100.00-100.00)                                                      | 100.00<br>(100.00-100.00) | 100.00<br>(100.00-100.00) | 18.32<br>(10.34-29.10)                                                                        | 18.44<br>(4.60-30.25)  | 17.87<br>(4.28-29.98)  | 59.19<br>(51.72-65.61)                                                                                           | 83.08<br>(80.02-85.65) | 85.87<br>(82.92-88.44) |
| Cambodia            | 31.31<br>(30.00-32.60)                                                                     | 32.11<br>(30.81-33.53) | 37.89<br>(36.60-39.21) | 9.99<br>(5.97-16.90)                                                           | 10.68<br>(6.66-17.60)     | 16.23<br>(12.32-22.89)    | 35.70<br>(28.71-43.55)                                                                        | 35.89<br>(25.76-44.93) | 35.25<br>(24.48-44.77) | 70.25<br>(63.77-75.66)                                                                                           | 84.31<br>(81.14-86.98) | 99.47<br>(99.33-99.58) |
| Indonesia           | 20.04<br>(18.95-21.17)                                                                     | 23.44<br>(22.23-24.62) | 26.79<br>(25.56-27.98) | 11.76<br>(7.58-16.00)                                                          | 13.51<br>(8.67-18.44)     | 18.50<br>(11.72-25.18)    | 36.15<br>(28.15-44.65)                                                                        | 36.32<br>(25.73-45.81) | 36.10<br>(25.01-46.16) | 67.74<br>(61.63-73.10)                                                                                           | 81.62<br>(78.17-84.60) | 83.97<br>(80.28-87.06) |
| Laos                | 33.29<br>(32.08-34.54)                                                                     | 37.15<br>(35.89-38.42) | 42.00<br>(40.57-43.35) | 20.11<br>(17.87-23.09)                                                         | 21.89<br>(20.10-23.98)    | 23.51<br>(22.16-25.26)    | 34.89<br>(27.68-43.53)                                                                        | 35.11<br>(23.50-45.13) | 35.41<br>(23.53-45.65) | 69.27<br>(62.18-75.17)                                                                                           | 77.06<br>(72.53-81.23) | 80.31<br>(75.88-83.91) |
| Malaysia            | 44.27<br>(42.99-45.53)                                                                     | 45.38<br>(44.11-46.64) | 46.41<br>(44.76-48.05) | 40.94<br>(36.05-48.06)                                                         | 45.45<br>(43.85-47.58)    | 56.72<br>(54.91-59.26)    | 57.40<br>(50.35-63.72)                                                                        | 57.16<br>(49.50-64.33) | 56.55<br>(48.36-63.67) | 60.20<br>(52.97-66.24)                                                                                           | 65.68<br>(59.35-71.32) | 59.78<br>(52.29-66.21) |
| Maldives            | 47.40<br>(46.20-48.66)                                                                     | 53.84<br>(52.40-55.24) | 57.78<br>(55.59-59.78) | 100.00<br>(100.00-100.00)                                                      | 100.00<br>(100.00-100.00) | 100.00<br>(100.00-100.00) | 31.94<br>(16.89-47.22)                                                                        | 32.11<br>(16.30-49.83) | 31.75<br>(15.72-49.28) | 99.71<br>(99.44-99.82)                                                                                           | 99.77<br>(99.56-99.86) | 99.74<br>(99.54-99.83) |

**Appendix Table 1a. Scaled values for each SDG health-related indicator and three summary indicators by country for 1990, 2000, and 2015**

| Location                       | Indicator 3.3.2: Age-standardised rate of new and relapsed TB cases (per 1,000 population) |                        |                        | Indicator 3.3.3: Age-standardised rate of malaria cases (per 1,000 population) |                           |                           | Indicator 3.3.4: Age-standardised rate of hepatitis B incident cases (per 100,000 population) |                        |                        | Indicator 3.3.5: Age-standardised prevalence rate of neglected tropical diseases (NTDs) (per 100,000 population) |                        |                        |
|--------------------------------|--------------------------------------------------------------------------------------------|------------------------|------------------------|--------------------------------------------------------------------------------|---------------------------|---------------------------|-----------------------------------------------------------------------------------------------|------------------------|------------------------|------------------------------------------------------------------------------------------------------------------|------------------------|------------------------|
|                                | 1990                                                                                       | 2000                   | 2015                   | 1990                                                                           | 2000                      | 2015                      | 1990                                                                                          | 2000                   | 2015                   | 1990                                                                                                             | 2000                   | 2015                   |
| Mauritius                      | 54.56<br>(52.34-57.06)                                                                     | 59.76<br>(57.46-62.22) | 58.91<br>(56.12-61.68) | 100.00<br>(100.00-100.00)                                                      | 100.00<br>(100.00-100.00) | 100.00<br>(100.00-100.00) | 31.96<br>(16.97-47.60)                                                                        | 32.06<br>(16.24-49.89) | 31.71<br>(15.74-49.16) | 99.26<br>(98.60-99.60)                                                                                           | 99.31<br>(98.68-99.65) | 99.28<br>(98.62-99.62) |
| Myanmar                        | 31.67<br>(30.30-33.03)                                                                     | 33.75<br>(32.41-35.09) | 38.25<br>(36.82-39.56) | 1.85<br>(0.00-5.36)                                                            | 2.53<br>(0.42-5.99)       | 6.01<br>(3.11-9.67)       | 32.17<br>(17.14-47.71)                                                                        | 32.21<br>(16.50-50.14) | 31.85<br>(15.85-49.41) | 60.12<br>(51.91-66.96)                                                                                           | 68.46<br>(62.32-74.10) | 85.72<br>(82.34-88.89) |
| Philippines                    | 24.46<br>(22.97-26.01)                                                                     | 27.76<br>(26.23-29.35) | 33.24<br>(31.91-34.68) | 20.82<br>(19.18-22.82)                                                         | 22.81<br>(21.32-24.72)    | 22.31<br>(20.55-24.46)    | 31.41<br>(24.33-39.73)                                                                        | 31.33<br>(19.18-41.35) | 31.55<br>(20.21-41.51) | 55.72<br>(47.76-62.77)                                                                                           | 59.26<br>(52.04-65.61) | 66.49<br>(59.89-72.35) |
| Sri Lanka                      | 40.30<br>(38.63-42.25)                                                                     | 46.23<br>(44.62-47.95) | 52.72<br>(51.01-54.43) | 17.69<br>(16.58-19.15)                                                         | 19.79<br>(18.60-21.20)    | 100.00<br>(100.00-100.00) | 39.13<br>(31.49-46.98)                                                                        | 39.32<br>(29.60-47.99) | 39.58<br>(29.72-48.42) | 77.43<br>(72.25-81.52)                                                                                           | 91.37<br>(89.56-92.99) | 90.49<br>(87.98-92.65) |
| Seychelles                     | 55.69<br>(53.85-57.57)                                                                     | 58.34<br>(56.25-60.41) | 57.18<br>(53.85-60.32) | 100.00<br>(100.00-100.00)                                                      | 100.00<br>(100.00-100.00) | 100.00<br>(100.00-100.00) | 31.95<br>(16.93-47.59)                                                                        | 32.01<br>(16.09-49.78) | 31.52<br>(15.45-49.02) | 69.63<br>(62.19-75.67)                                                                                           | 79.46<br>(75.15-83.91) | 69.57<br>(62.51-75.62) |
| Thailand                       | 39.45<br>(38.14-40.75)                                                                     | 42.09<br>(40.64-43.52) | 45.18<br>(43.74-46.64) | 23.61<br>(21.32-26.64)                                                         | 26.58<br>(25.16-28.48)    | 26.18<br>(24.49-28.29)    | 33.34<br>(25.35-42.15)                                                                        | 33.74<br>(22.52-43.37) | 33.31<br>(22.55-42.59) | 77.18<br>(71.78-81.47)                                                                                           | 88.24<br>(85.88-90.45) | 86.80<br>(83.54-89.36) |
| Timor-Leste                    | 34.38<br>(33.07-35.67)                                                                     | 35.17<br>(33.70-36.53) | 35.94<br>(34.24-37.64) | 14.61<br>(13.25-16.24)                                                         | 15.77<br>(14.48-17.50)    | 15.94<br>(14.43-17.90)    | 31.91<br>(16.82-47.47)                                                                        | 31.95<br>(16.02-49.74) | 31.62<br>(15.62-48.93) | 82.07<br>(77.01-85.90)                                                                                           | 88.28<br>(85.59-90.68) | 83.11<br>(77.92-86.98) |
| Vietnam                        | 37.46<br>(36.23-38.77)                                                                     | 41.12<br>(39.93-42.40) | 45.54<br>(44.31-46.77) | 21.99<br>(17.89-29.17)                                                         | 24.23<br>(20.24-30.95)    | 28.22<br>(24.85-33.65)    | 33.31<br>(25.52-42.27)                                                                        | 33.29<br>(22.80-43.20) | 32.89<br>(21.24-42.59) | 63.30<br>(56.55-68.97)                                                                                           | 67.32<br>(61.47-72.44) | 84.48<br>(80.91-87.81) |
| Federated States of Micronesia | 49.24<br>(47.97-50.48)                                                                     | 52.92<br>(51.60-54.30) | 53.31<br>(51.42-55.24) | 100.00<br>(100.00-100.00)                                                      | 100.00<br>(100.00-100.00) | 100.00<br>(100.00-100.00) | 16.91<br>(0.94-33.80)                                                                         | 17.39<br>(0.47-36.62)  | 16.93<br>(0.29-36.82)  | 74.30<br>(67.91-79.26)                                                                                           | 81.97<br>(78.25-85.47) | 74.61<br>(66.69-80.82) |
| Fiji                           | 51.97<br>(50.63-53.20)                                                                     | 55.04<br>(53.77-56.25) | 58.69<br>(57.00-60.26) | 100.00<br>(100.00-100.00)                                                      | 100.00<br>(100.00-100.00) | 100.00<br>(100.00-100.00) | 25.84<br>(17.65-35.47)                                                                        | 25.70<br>(14.46-36.66) | 25.72<br>(13.66-36.12) | 61.14<br>(53.72-67.47)                                                                                           | 70.24<br>(64.42-75.19) | 63.09<br>(55.58-69.83) |
| Kiribati                       | 28.24<br>(27.06-29.55)                                                                     | 31.52<br>(30.26-32.80) | 35.59<br>(34.17-37.01) | 100.00<br>(100.00-100.00)                                                      | 100.00<br>(100.00-100.00) | 100.00<br>(100.00-100.00) | 17.16<br>(1.23-34.29)                                                                         | 17.57<br>(0.79-36.68)  | 17.19<br>(0.89-36.87)  | 59.27<br>(51.49-65.92)                                                                                           | 63.23<br>(56.87-69.02) | 66.42<br>(59.96-71.84) |

**Appendix Table 1a. Scaled values for each SDG health-related indicator and three summary indicators by country for 1990, 2000, and 2015**

| Location         | Indicator 3.3.2: Age-standardised rate of new and relapsed TB cases (per 1,000 population) |                        |                        | Indicator 3.3.3: Age-standardised rate of malaria cases (per 1,000 population) |                           |                           | Indicator 3.3.4: Age-standardised rate of hepatitis B incident cases (per 100,000 population) |                        |                        | Indicator 3.3.5: Age-standardised prevalence rate of neglected tropical diseases (NTDs) (per 100,000 population) |                        |                        |
|------------------|--------------------------------------------------------------------------------------------|------------------------|------------------------|--------------------------------------------------------------------------------|---------------------------|---------------------------|-----------------------------------------------------------------------------------------------|------------------------|------------------------|------------------------------------------------------------------------------------------------------------------|------------------------|------------------------|
|                  | 1990                                                                                       | 2000                   | 2015                   | 1990                                                                           | 2000                      | 2015                      | 1990                                                                                          | 2000                   | 2015                   | 1990                                                                                                             | 2000                   | 2015                   |
| Marshall Islands | 47.46<br>(46.08-48.82)                                                                     | 51.62<br>(50.37-52.89) | 53.81<br>(52.00-55.59) | 100.00<br>(100.00-100.00)                                                      | 100.00<br>(100.00-100.00) | 100.00<br>(100.00-100.00) | 16.90<br>(0.97-33.92)                                                                         | 17.33<br>(0.36-36.79)  | 16.94<br>(0.38-36.86)  | 61.93<br>(53.95-68.24)                                                                                           | 67.23<br>(61.47-72.34) | 62.91<br>(55.64-69.13) |
| Papua New Guinea | 48.11<br>(46.79-49.46)                                                                     | 47.42<br>(46.06-48.67) | 48.22<br>(46.77-49.70) | 5.02<br>(2.52-8.26)                                                            | 4.57<br>(2.20-7.82)       | 5.84<br>(3.10-9.37)       | 20.61<br>(12.02-30.82)                                                                        | 20.90<br>(9.21-31.87)  | 20.79<br>(8.32-31.75)  | 50.04<br>(40.45-58.29)                                                                                           | 55.45<br>(47.13-62.57) | 54.42<br>(45.80-61.63) |
| Samoa            | 54.67<br>(53.21-56.03)                                                                     | 59.62<br>(58.14-61.12) | 62.19<br>(59.81-64.35) | 100.00<br>(100.00-100.00)                                                      | 100.00<br>(100.00-100.00) | 100.00<br>(100.00-100.00) | 16.90<br>(1.24-34.18)                                                                         | 17.20<br>(0.00-36.81)  | 16.82<br>(0.16-36.72)  | 96.22<br>(95.00-97.09)                                                                                           | 97.11<br>(96.11-97.80) | 97.46<br>(96.73-98.10) |
| Solomon Islands  | 39.58<br>(38.28-40.89)                                                                     | 44.46<br>(43.19-45.74) | 49.78<br>(48.55-51.10) | 9.79<br>(7.77-12.30)                                                           | 10.84<br>(9.16-12.88)     | 11.62<br>(10.27-13.23)    | 22.01<br>(14.65-31.73)                                                                        | 21.78<br>(9.65-32.63)  | 22.29<br>(9.52-33.50)  | 73.15<br>(66.68-78.80)                                                                                           | 80.92<br>(76.83-84.63) | 73.61<br>(67.27-78.82) |
| Tonga            | 63.25<br>(60.39-65.95)                                                                     | 65.32<br>(62.66-67.92) | 61.42<br>(58.13-64.47) | 100.00<br>(100.00-100.00)                                                      | 100.00<br>(100.00-100.00) | 100.00<br>(100.00-100.00) | 17.03<br>(1.38-34.01)                                                                         | 17.37<br>(0.35-36.91)  | 17.06<br>(0.59-36.86)  | 90.73<br>(82.76-93.81)                                                                                           | 94.79<br>(92.05-96.23) | 93.04<br>(90.84-94.81) |
| Vanuatu          | 43.45<br>(42.22-44.79)                                                                     | 47.96<br>(46.77-49.20) | 53.70<br>(52.47-54.91) | 10.94<br>(8.79-13.77)                                                          | 11.74<br>(9.83-14.11)     | 12.73<br>(11.28-14.47)    | 16.86<br>(0.96-33.53)                                                                         | 17.30<br>(0.34-36.52)  | 16.99<br>(0.59-36.77)  | 95.73<br>(94.56-96.70)                                                                                           | 96.16<br>(95.11-97.03) | 65.02<br>(58.54-71.31) |
| Afghanistan      | 38.86<br>(37.34-40.16)                                                                     | 41.39<br>(40.01-42.69) | 45.10<br>(43.71-46.48) | 11.58<br>(7.44-19.00)                                                          | 11.14<br>(7.01-18.51)     | 14.30<br>(10.10-21.94)    | 31.70<br>(10.27-52.72)                                                                        | 30.50<br>(8.94-53.10)  | 31.34<br>(9.34-54.29)  | 73.91<br>(67.02-79.60)                                                                                           | 81.69<br>(77.97-85.15) | 76.08<br>(69.33-82.18) |
| Algeria          | 45.38<br>(44.09-46.78)                                                                     | 50.30<br>(49.02-51.72) | 54.12<br>(52.45-55.76) | 51.13<br>(41.70-90.62)                                                         | 96.81<br>(96.18-97.67)    | 95.53<br>(94.73-96.68)    | 31.77<br>(10.30-52.91)                                                                        | 30.62<br>(9.13-53.15)  | 31.51<br>(9.66-54.45)  | 90.28<br>(84.88-93.53)                                                                                           | 91.28<br>(85.97-94.37) | 90.40<br>(85.09-93.63) |
| Bahrain          | 53.96<br>(52.37-55.58)                                                                     | 57.74<br>(55.93-59.48) | 66.06<br>(63.40-68.45) | 100.00<br>(100.00-100.00)                                                      | 100.00<br>(100.00-100.00) | 100.00<br>(100.00-100.00) | 30.89<br>(8.61-52.25)                                                                         | 29.74<br>(7.37-52.72)  | 30.17<br>(6.69-53.55)  | 99.86<br>(99.83-99.89)                                                                                           | 99.90<br>(99.87-99.92) | 99.86<br>(99.82-99.89) |
| Egypt            | 61.95<br>(60.44-63.50)                                                                     | 68.16<br>(66.49-70.01) | 73.47<br>(70.93-75.91) | 68.82<br>(61.85-82.50)                                                         | 69.61<br>(62.63-83.22)    | 100.00<br>(100.00-100.00) | 46.36<br>(39.44-53.30)                                                                        | 46.24<br>(37.60-54.08) | 46.36<br>(37.32-54.43) | 87.80<br>(80.42-91.84)                                                                                           | 89.44<br>(82.00-93.31) | 93.19<br>(91.65-95.02) |
| Iran             | 59.88<br>(58.36-61.46)                                                                     | 64.39<br>(62.73-66.08) | 62.86<br>(60.88-64.88) | 37.67<br>(35.97-39.67)                                                         | 54.30<br>(52.46-56.69)    | 82.55<br>(80.77-85.30)    | 59.85<br>(52.56-65.89)                                                                        | 60.32<br>(52.77-67.04) | 60.06<br>(52.05-66.82) | 98.52<br>(98.22-98.78)                                                                                           | 98.77<br>(98.55-98.97) | 98.52<br>(98.17-98.81) |

**Appendix Table 1a. Scaled values for each SDG health-related indicator and three summary indicators by country for 1990, 2000, and 2015**

| Location     | Indicator 3.3.2: Age-standardised rate of new and relapsed TB cases (per 1,000 population) |                        |                        | Indicator 3.3.3: Age-standardised rate of malaria cases (per 1,000 population) |                           |                           | Indicator 3.3.4: Age-standardised rate of hepatitis B incident cases (per 100,000 population) |                        |                        | Indicator 3.3.5: Age-standardised prevalence rate of neglected tropical diseases (NTDs) (per 100,000 population) |                        |                        |
|--------------|--------------------------------------------------------------------------------------------|------------------------|------------------------|--------------------------------------------------------------------------------|---------------------------|---------------------------|-----------------------------------------------------------------------------------------------|------------------------|------------------------|------------------------------------------------------------------------------------------------------------------|------------------------|------------------------|
|              | 1990                                                                                       | 2000                   | 2015                   | 1990                                                                           | 2000                      | 2015                      | 1990                                                                                          | 2000                   | 2015                   | 1990                                                                                                             | 2000                   | 2015                   |
| Iraq         | 44.10<br>(42.72-45.51)                                                                     | 48.64<br>(47.37-50.10) | 53.08<br>(51.66-54.56) | 53.60<br>(51.55-56.14)                                                         | 64.05<br>(61.84-67.01)    | 100.00<br>(100.00-100.00) | 31.82<br>(10.36-52.74)                                                                        | 30.71<br>(9.31-53.20)  | 31.52<br>(9.48-54.44)  | 99.33<br>(99.14-99.49)                                                                                           | 99.41<br>(99.25-99.54) | 99.38<br>(99.21-99.52) |
| Jordan       | 78.06<br>(74.78-81.23)                                                                     | 82.48<br>(79.24-86.07) | 82.80<br>(78.34-87.19) | 100.00<br>(100.00-100.00)                                                      | 100.00<br>(100.00-100.00) | 100.00<br>(100.00-100.00) | 42.05<br>(34.37-49.87)                                                                        | 42.43<br>(33.39-50.91) | 42.56<br>(33.03-51.10) | 88.63<br>(85.85-90.85)                                                                                           | 91.40<br>(89.74-92.90) | 85.63<br>(81.92-88.74) |
| Kuwait       | 48.92<br>(46.56-51.30)                                                                     | 55.48<br>(53.43-57.54) | 64.20<br>(61.82-66.44) | 100.00<br>(100.00-100.00)                                                      | 100.00<br>(100.00-100.00) | 100.00<br>(100.00-100.00) | 31.45<br>(9.56-52.72)                                                                         | 29.59<br>(6.91-52.66)  | 30.90<br>(8.06-53.97)  | 99.96<br>(99.95-99.97)                                                                                           | 99.99<br>(99.99-99.99) | 99.99<br>(99.99-99.99) |
| Lebanon      | 63.78<br>(62.00-65.46)                                                                     | 70.79<br>(69.09-72.66) | 72.77<br>(69.97-75.66) | 100.00<br>(100.00-100.00)                                                      | 100.00<br>(100.00-100.00) | 100.00<br>(100.00-100.00) | 31.98<br>(10.81-52.78)                                                                        | 30.77<br>(9.36-53.29)  | 31.55<br>(9.90-54.51)  | 99.86<br>(99.83-99.89)                                                                                           | 99.90<br>(99.87-99.92) | 99.86<br>(99.83-99.89) |
| Libya        | 58.24<br>(56.22-60.09)                                                                     | 63.25<br>(61.26-65.29) | 64.96<br>(62.58-67.41) | 100.00<br>(100.00-100.00)                                                      | 100.00<br>(100.00-100.00) | 100.00<br>(100.00-100.00) | 31.39<br>(9.46-52.78)                                                                         | 30.39<br>(8.39-52.96)  | 31.55<br>(9.67-54.54)  | 90.68<br>(86.61-93.41)                                                                                           | 95.87<br>(92.50-97.78) | 95.92<br>(92.63-97.88) |
| Morocco      | 40.40<br>(39.05-41.74)                                                                     | 45.55<br>(44.29-46.81) | 48.62<br>(47.29-49.96) | 68.93<br>(61.96-82.60)                                                         | 100.00<br>(100.00-100.00) | 100.00<br>(100.00-100.00) | 31.87<br>(10.55-52.93)                                                                        | 30.78<br>(9.32-53.22)  | 31.64<br>(9.74-54.47)  | 93.81<br>(92.40-95.09)                                                                                           | 95.62<br>(94.64-96.52) | 92.11<br>(90.05-93.90) |
| Palestine    | 75.08<br>(70.21-80.31)                                                                     | 68.38<br>(64.23-72.53) | 67.65<br>(63.25-72.01) | 100.00<br>(100.00-100.00)                                                      | 100.00<br>(100.00-100.00) | 100.00<br>(100.00-100.00) | 31.77<br>(10.32-52.90)                                                                        | 30.64<br>(9.27-53.18)  | 31.49<br>(9.63-54.48)  | 94.23<br>(92.13-95.75)                                                                                           | 96.32<br>(95.53-97.07) | 94.53<br>(92.66-96.01) |
| Oman         | 60.98<br>(59.01-62.92)                                                                     | 66.92<br>(64.68-69.13) | 68.66<br>(65.72-71.71) | 71.81<br>(64.85-85.15)                                                         | 71.68<br>(64.72-85.04)    | 100.00<br>(100.00-100.00) | 30.96<br>(8.82-52.56)                                                                         | 29.72<br>(7.29-52.97)  | 29.74<br>(5.85-53.40)  | 99.47<br>(99.31-99.59)                                                                                           | 99.68<br>(99.61-99.75) | 99.55<br>(99.37-99.66) |
| Qatar        | 61.43<br>(58.73-64.02)                                                                     | 61.27<br>(58.40-64.26) | 62.02<br>(59.59-64.58) | 100.00<br>(100.00-100.00)                                                      | 100.00<br>(100.00-100.00) | 100.00<br>(100.00-100.00) | 29.88<br>(7.35-51.86)                                                                         | 28.85<br>(5.61-52.56)  | 29.05<br>(4.46-53.08)  | 99.86<br>(99.82-99.89)                                                                                           | 99.90<br>(99.87-99.92) | 99.86<br>(99.82-99.89) |
| Saudi Arabia | 50.02<br>(47.75-52.29)                                                                     | 56.49<br>(54.07-58.56) | 62.54<br>(60.02-65.37) | 40.28<br>(38.52-42.35)                                                         | 52.77<br>(50.96-55.26)    | 92.94<br>(91.84-94.59)    | 48.04<br>(41.54-55.00)                                                                        | 48.80<br>(40.32-56.50) | 45.51<br>(35.91-53.56) | 96.41<br>(95.78-96.99)                                                                                           | 96.70<br>(96.11-97.20) | 95.69<br>(94.92-96.37) |
| Sudan        | 48.53<br>(47.24-49.85)                                                                     | 49.28<br>(48.02-50.60) | 53.80<br>(52.42-55.14) | 11.65<br>(9.10-14.26)                                                          | 10.18<br>(8.05-12.62)     | 13.95<br>(12.12-15.89)    | 41.82<br>(34.29-49.81)                                                                        | 42.62<br>(33.23-51.25) | 42.25<br>(32.23-50.97) | 64.49<br>(54.90-72.69)                                                                                           | 68.19<br>(58.93-76.08) | 76.58<br>(69.07-82.24) |

**Appendix Table 1a. Scaled values for each SDG health-related indicator and three summary indicators by country for 1990, 2000, and 2015**

| Location             | Indicator 3.3.2: Age-standardised rate of new and relapsed TB cases (per 1,000 population) |                        |                        | Indicator 3.3.3: Age-standardised rate of malaria cases (per 1,000 population) |                           |                           | Indicator 3.3.4: Age-standardised rate of hepatitis B incident cases (per 100,000 population) |                        |                        | Indicator 3.3.5: Age-standardised prevalence rate of neglected tropical diseases (NTDs) (per 100,000 population) |                        |                        |
|----------------------|--------------------------------------------------------------------------------------------|------------------------|------------------------|--------------------------------------------------------------------------------|---------------------------|---------------------------|-----------------------------------------------------------------------------------------------|------------------------|------------------------|------------------------------------------------------------------------------------------------------------------|------------------------|------------------------|
|                      | 1990                                                                                       | 2000                   | 2015                   | 1990                                                                           | 2000                      | 2015                      | 1990                                                                                          | 2000                   | 2015                   | 1990                                                                                                             | 2000                   | 2015                   |
| Syria                | 77.71<br>(74.49-80.78)                                                                     | 75.66<br>(72.11-79.01) | 72.66<br>(69.44-76.12) | 69.34<br>(62.36-82.97)                                                         | 70.01<br>(63.03-83.57)    | 100.00<br>(100.00-100.00) | 43.62<br>(35.81-51.31)                                                                        | 43.29<br>(33.60-52.14) | 43.24<br>(33.77-51.76) | 84.98<br>(81.61-87.96)                                                                                           | 89.05<br>(86.96-90.81) | 85.61<br>(82.13-88.49) |
| Tunisia              | 54.94<br>(53.66-56.25)                                                                     | 62.15<br>(61.01-63.15) | 63.56<br>(61.77-65.15) | 100.00<br>(100.00-100.00)                                                      | 100.00<br>(100.00-100.00) | 100.00<br>(100.00-100.00) | 31.81<br>(10.27-52.89)                                                                        | 30.71<br>(9.27-53.21)  | 31.60<br>(9.79-54.51)  | 94.65<br>(93.63-95.62)                                                                                           | 95.70<br>(94.89-96.38) | 94.76<br>(93.80-95.61) |
| Turkey               | 55.44<br>(53.95-56.89)                                                                     | 62.53<br>(60.75-64.22) | 68.58<br>(66.05-71.24) | 52.98<br>(46.70-64.66)                                                         | 53.96<br>(52.23-56.35)    | 100.00<br>(100.00-100.00) | 42.63<br>(35.30-49.98)                                                                        | 42.78<br>(33.03-51.24) | 42.53<br>(32.56-51.00) | 96.12<br>(95.06-97.00)                                                                                           | 97.54<br>(97.01-98.04) | 96.55<br>(95.63-97.31) |
| United Arab Emirates | 55.97<br>(54.20-57.84)                                                                     | 63.81<br>(61.80-65.88) | 68.26<br>(65.01-71.82) | 61.59<br>(54.82-75.46)                                                         | 100.00<br>(100.00-100.00) | 100.00<br>(100.00-100.00) | 29.93<br>(7.39-52.00)                                                                         | 28.51<br>(5.19-52.84)  | 29.17<br>(5.25-52.89)  | 99.86<br>(99.82-99.89)                                                                                           | 99.89<br>(99.87-99.92) | 99.86<br>(99.81-99.89) |
| Yemen                | 43.34<br>(42.02-44.67)                                                                     | 46.01<br>(44.68-47.24) | 51.77<br>(50.37-53.12) | 25.56<br>(16.02-35.74)                                                         | 26.01<br>(16.54-35.92)    | 27.99<br>(17.35-39.09)    | 38.89<br>(31.36-47.19)                                                                        | 39.36<br>(28.84-48.74) | 39.65<br>(29.47-48.74) | 74.22<br>(62.89-81.73)                                                                                           | 78.34<br>(67.48-85.28) | 84.08<br>(79.08-87.70) |
| Bangladesh           | 36.09<br>(34.76-37.41)                                                                     | 41.26<br>(39.96-42.49) | 43.01<br>(41.57-44.43) | 17.71<br>(13.79-24.39)                                                         | 21.77<br>(18.15-27.60)    | 23.61<br>(20.50-28.54)    | 52.24<br>(44.68-58.79)                                                                        | 52.40<br>(44.25-59.94) | 52.43<br>(43.36-60.01) | 60.53<br>(53.57-66.79)                                                                                           | 66.05<br>(59.85-71.47) | 71.93<br>(65.86-77.12) |
| Bhutan               | 29.97<br>(28.46-31.46)                                                                     | 31.95<br>(30.27-33.46) | 35.39<br>(33.49-37.10) | 18.13<br>(16.82-19.67)                                                         | 21.43<br>(20.16-23.03)    | 58.94<br>(57.13-61.52)    | 49.28<br>(41.93-56.21)                                                                        | 49.27<br>(40.82-57.13) | 49.71<br>(40.96-57.64) | 89.53<br>(86.22-92.33)                                                                                           | 94.31<br>(92.98-95.57) | 90.12<br>(86.35-92.87) |
| India                | 24.79<br>(22.98-26.57)                                                                     | 26.95<br>(24.98-28.79) | 33.54<br>(31.94-35.09) | 8.34<br>(5.74-11.73)                                                           | 8.47<br>(5.75-11.81)      | 10.42<br>(7.01-14.37)     | 57.25<br>(50.25-63.58)                                                                        | 57.64<br>(49.93-64.36) | 57.37<br>(49.07-64.39) | 82.61<br>(79.47-85.26)                                                                                           | 86.77<br>(84.32-88.82) | 85.35<br>(82.65-87.68) |
| Nepal                | 26.55<br>(25.40-27.76)                                                                     | 30.37<br>(29.12-31.68) | 34.88<br>(33.46-36.28) | 22.53<br>(18.06-30.95)                                                         | 22.37<br>(17.91-30.75)    | 23.29<br>(18.85-31.56)    | 57.49<br>(50.24-63.81)                                                                        | 57.36<br>(49.26-64.60) | 57.10<br>(48.91-64.41) | 63.67<br>(56.68-69.93)                                                                                           | 72.06<br>(66.58-77.03) | 74.52<br>(68.67-79.50) |
| Pakistan             | 31.68<br>(30.47-32.96)                                                                     | 34.93<br>(33.71-36.24) | 37.11<br>(35.84-38.34) | 18.71<br>(14.97-24.74)                                                         | 18.03<br>(14.28-24.13)    | 18.54<br>(14.89-24.43)    | 51.87<br>(44.55-58.63)                                                                        | 52.22<br>(43.90-59.79) | 52.19<br>(43.04-59.67) | 90.66<br>(87.77-92.90)                                                                                           | 93.82<br>(92.49-95.06) | 91.52<br>(88.72-93.68) |
| Botswana             | 11.85<br>(10.80-12.95)                                                                     | 1.10<br>(0.43-1.85)    | 4.91<br>(4.05-5.68)    | 20.63<br>(17.62-23.62)                                                         | 20.23<br>(17.18-23.25)    | 22.95<br>(18.81-27.36)    | 34.96<br>(23.55-46.89)                                                                        | 35.14<br>(21.66-48.19) | 34.86<br>(22.17-48.79) | 72.02<br>(64.31-78.26)                                                                                           | 77.82<br>(70.66-83.33) | 72.84<br>(64.77-78.95) |

**Appendix Table 1a. Scaled values for each SDG health-related indicator and three summary indicators by country for 1990, 2000, and 2015**

| Location      | Indicator 3.3.2: Age-standardised rate of new and relapsed TB cases (per 1,000 population) |                        |                        | Indicator 3.3.3: Age-standardised rate of malaria cases (per 1,000 population) |                           |                           | Indicator 3.3.4: Age-standardised rate of hepatitis B incident cases (per 100,000 population) |                        |                        | Indicator 3.3.5: Age-standardised prevalence rate of neglected tropical diseases (NTDs) (per 100,000 population) |                        |                        |
|---------------|--------------------------------------------------------------------------------------------|------------------------|------------------------|--------------------------------------------------------------------------------|---------------------------|---------------------------|-----------------------------------------------------------------------------------------------|------------------------|------------------------|------------------------------------------------------------------------------------------------------------------|------------------------|------------------------|
|               | 1990                                                                                       | 2000                   | 2015                   | 1990                                                                           | 2000                      | 2015                      | 1990                                                                                          | 2000                   | 2015                   | 1990                                                                                                             | 2000                   | 2015                   |
| Lesotho       | 18.07<br>(16.76-19.39)                                                                     | 8.00<br>(7.21-8.83)    | 4.69<br>(4.01-5.46)    | 100.00<br>(100.00-100.00)                                                      | 100.00<br>(100.00-100.00) | 100.00<br>(100.00-100.00) | 35.01<br>(23.66-46.96)                                                                        | 35.21<br>(21.83-48.22) | 34.88<br>(21.97-48.83) | 66.37<br>(59.52-72.68)                                                                                           | 76.62<br>(71.50-81.17) | 66.26<br>(59.32-72.74) |
| Namibia       | 15.05<br>(13.97-16.18)                                                                     | 6.37<br>(5.55-7.37)    | 10.28<br>(9.35-11.17)  | 7.83<br>(4.25-11.61)                                                           | 7.63<br>(4.13-11.37)      | 11.28<br>(7.24-17.61)     | 37.00<br>(29.30-45.53)                                                                        | 36.96<br>(27.26-46.00) | 37.19<br>(27.14-46.69) | 86.73<br>(83.02-89.84)                                                                                           | 91.98<br>(90.17-93.81) | 87.88<br>(84.03-90.81) |
| South Africa  | 20.91<br>(19.07-23.02)                                                                     | 9.66<br>(7.92-11.36)   | 9.00<br>(7.12-10.61)   | 46.04<br>(41.51-52.57)                                                         | 100.00<br>(100.00-100.00) | 59.07<br>(57.24-61.68)    | 34.76<br>(27.22-42.61)                                                                        | 35.17<br>(24.95-44.83) | 34.88<br>(24.01-44.50) | 60.46<br>(50.84-67.90)                                                                                           | 69.01<br>(60.56-75.35) | 60.77<br>(50.42-68.25) |
| Swaziland     | 14.60<br>(13.35-15.84)                                                                     | 2.36<br>(1.65-3.17)    | 3.14<br>(2.36-3.93)    | 46.89<br>(43.00-51.69)                                                         | 46.23<br>(42.48-50.84)    | 53.18<br>(38.14-69.14)    | 35.08<br>(23.57-46.96)                                                                        | 35.21<br>(22.08-48.21) | 34.88<br>(22.06-48.77) | 43.00<br>(26.60-55.97)                                                                                           | 52.75<br>(37.59-64.73) | 46.25<br>(32.45-57.99) |
| Zimbabwe      | 19.28<br>(18.07-20.62)                                                                     | 10.21<br>(9.13-11.38)  | 15.03<br>(14.15-15.99) | 14.42<br>(12.43-16.54)                                                         | 14.43<br>(12.45-16.62)    | 13.80<br>(9.57-17.92)     | 36.51<br>(28.63-45.05)                                                                        | 36.66<br>(26.77-45.88) | 37.16<br>(26.86-46.11) | 48.26<br>(30.62-62.27)                                                                                           | 55.43<br>(38.03-68.91) | 65.25<br>(55.00-73.14) |
| Benin         | 37.54<br>(36.22-39.02)                                                                     | 36.45<br>(35.11-37.84) | 40.26<br>(38.94-41.49) | 3.56<br>(1.54-6.47)                                                            | 3.17<br>(1.31-5.92)       | 2.85<br>(1.77-4.69)       | 32.94<br>(21.59-45.25)                                                                        | 33.19<br>(19.40-46.17) | 32.76<br>(19.93-46.54) | 50.11<br>(27.22-67.27)                                                                                           | 59.51<br>(36.91-76.50) | 77.77<br>(65.70-85.59) |
| Burkina Faso  | 32.04<br>(30.79-33.36)                                                                     | 31.44<br>(30.15-32.81) | 36.50<br>(35.21-37.77) | 0.63<br>(0.04-2.41)                                                            | 0.44<br>(0.00-2.27)       | 1.72<br>(0.31-4.00)       | 32.95<br>(21.56-45.15)                                                                        | 33.19<br>(19.45-46.17) | 32.77<br>(19.87-46.74) | 53.02<br>(38.77-65.60)                                                                                           | 58.75<br>(44.81-70.86) | 92.74<br>(86.70-95.37) |
| Cameroon      | 35.03<br>(33.58-36.42)                                                                     | 31.85<br>(30.53-33.27) | 35.76<br>(34.41-37.13) | 3.01<br>(1.65-5.16)                                                            | 2.29<br>(1.14-4.25)       | 3.89<br>(2.28-6.34)       | 34.34<br>(27.03-42.58)                                                                        | 34.62<br>(24.49-43.99) | 33.81<br>(23.40-43.46) | 25.53<br>(10.34-38.34)                                                                                           | 40.50<br>(27.36-51.42) | 75.17<br>(69.44-79.91) |
| Cape Verde    | 47.64<br>(46.35-48.86)                                                                     | 51.05<br>(49.67-52.30) | 53.74<br>(52.05-55.42) | 17.51<br>(11.35-30.65)                                                         | 50.59<br>(48.73-52.99)    | 94.70<br>(93.79-96.01)    | 32.87<br>(21.28-45.37)                                                                        | 33.17<br>(19.22-46.06) | 32.79<br>(19.84-46.66) | 98.72<br>(98.37-99.01)                                                                                           | 99.07<br>(98.86-99.25) | 99.01<br>(98.69-99.26) |
| Chad          | 33.22<br>(32.05-34.48)                                                                     | 30.58<br>(29.33-31.96) | 33.09<br>(31.81-34.37) | 5.55<br>(2.28-9.19)                                                            | 5.27<br>(2.16-8.71)       | 7.12<br>(2.42-12.33)      | 32.98<br>(21.66-45.20)                                                                        | 33.22<br>(19.59-46.05) | 32.77<br>(20.00-46.61) | 66.54<br>(53.62-76.67)                                                                                           | 72.48<br>(60.10-81.76) | 70.19<br>(57.40-80.32) |
| Cote d'Ivoire | 31.59<br>(30.18-32.99)                                                                     | 28.98<br>(27.70-30.33) | 34.41<br>(33.14-35.67) | 1.04<br>(0.23-3.02)                                                            | 0.91<br>(0.16-2.92)       | 1.71<br>(0.74-3.71)       | 33.06<br>(21.62-45.57)                                                                        | 33.28<br>(19.76-46.23) | 32.79<br>(19.99-46.73) | 30.91<br>(12.87-45.68)                                                                                           | 43.89<br>(28.27-56.45) | 72.97<br>(63.52-79.65) |

**Appendix Table 1a. Scaled values for each SDG health-related indicator and three summary indicators by country for 1990, 2000, and 2015**

| Location              | Indicator 3.3.2: Age-standardised rate of new and relapsed TB cases (per 1,000 population) |                        |                        | Indicator 3.3.3: Age-standardised rate of malaria cases (per 1,000 population) |                        |                        | Indicator 3.3.4: Age-standardised rate of hepatitis B incident cases (per 100,000 population) |                        |                        | Indicator 3.3.5: Age-standardised prevalence rate of neglected tropical diseases (NTDs) (per 100,000 population) |                        |                        |
|-----------------------|--------------------------------------------------------------------------------------------|------------------------|------------------------|--------------------------------------------------------------------------------|------------------------|------------------------|-----------------------------------------------------------------------------------------------|------------------------|------------------------|------------------------------------------------------------------------------------------------------------------|------------------------|------------------------|
|                       | 1990                                                                                       | 2000                   | 2015                   | 1990                                                                           | 2000                   | 2015                   | 1990                                                                                          | 2000                   | 2015                   | 1990                                                                                                             | 2000                   | 2015                   |
| The Gambia            | 38.71<br>(37.47-39.90)                                                                     | 38.89<br>(37.64-40.14) | 40.82<br>(39.43-42.15) | 4.82<br>(2.76-6.90)                                                            | 4.43<br>(2.44-6.45)    | 15.13<br>(11.33-18.87) | 32.98<br>(21.59-45.48)                                                                        | 33.19<br>(19.39-45.95) | 32.74<br>(19.84-46.56) | 82.35<br>(72.73-89.19)                                                                                           | 84.58<br>(74.93-91.27) | 82.60<br>(72.86-89.22) |
| Ghana                 | 33.96<br>(32.66-35.37)                                                                     | 33.45<br>(32.00-34.96) | 39.23<br>(37.95-40.56) | 1.74<br>(0.60-3.69)                                                            | 1.39<br>(0.42-3.45)    | 2.91<br>(1.22-5.25)    | 34.95<br>(26.97-43.13)                                                                        | 34.84<br>(24.20-44.79) | 34.65<br>(23.57-44.29) | 51.52<br>(33.90-67.03)                                                                                           | 57.50<br>(40.42-72.55) | 79.28<br>(68.32-86.39) |
| Guinea                | 35.81<br>(34.56-37.11)                                                                     | 33.08<br>(31.71-34.50) | 36.36<br>(35.13-37.57) | 1.97<br>(0.66-4.02)                                                            | 1.59<br>(0.45-3.60)    | 1.57<br>(0.88-3.30)    | 32.98<br>(21.59-45.16)                                                                        | 33.22<br>(19.57-46.06) | 32.78<br>(20.01-46.63) | 44.15<br>(25.88-59.91)                                                                                           | 53.95<br>(36.87-68.43) | 55.91<br>(41.09-68.97) |
| Guinea-Bissau         | 34.92<br>(33.65-36.25)                                                                     | 31.57<br>(30.30-32.95) | 29.66<br>(28.43-30.91) | 2.72<br>(0.73-4.88)                                                            | 2.68<br>(0.73-4.84)    | 9.77<br>(5.34-14.43)   | 32.97<br>(21.63-45.21)                                                                        | 33.21<br>(19.51-46.07) | 32.76<br>(19.97-46.59) | 56.66<br>(35.24-71.02)                                                                                           | 63.06<br>(42.06-76.79) | 74.05<br>(52.86-87.17) |
| Liberia               | 28.85<br>(27.68-30.11)                                                                     | 29.92<br>(28.59-31.19) | 31.60<br>(30.06-33.01) | 2.21<br>(0.22-4.83)                                                            | 1.61<br>(0.00-3.83)    | 2.88<br>(0.92-5.24)    | 32.98<br>(21.66-45.22)                                                                        | 33.23<br>(19.63-46.04) | 32.79<br>(20.00-46.62) | 12.32<br>(0.00-36.40)                                                                                            | 24.65<br>(10.13-47.42) | 38.58<br>(25.42-54.46) |
| Mali                  | 34.97<br>(33.70-36.26)                                                                     | 35.90<br>(34.75-37.21) | 39.65<br>(38.34-40.95) | 1.66<br>(0.64-3.45)                                                            | 1.53<br>(0.52-3.34)    | 1.33<br>(0.73-3.09)    | 32.97<br>(21.62-45.24)                                                                        | 33.23<br>(19.66-46.09) | 32.80<br>(20.01-46.61) | 40.47<br>(25.27-54.28)                                                                                           | 46.35<br>(31.28-59.68) | 89.70<br>(80.56-93.10) |
| Mauritania            | 35.22<br>(33.93-36.48)                                                                     | 37.21<br>(35.91-38.47) | 42.59<br>(41.25-43.93) | 11.13<br>(7.09-15.99)                                                          | 10.02<br>(6.28-14.92)  | 12.98<br>(9.44-17.44)  | 33.00<br>(21.59-45.16)                                                                        | 33.24<br>(19.59-46.12) | 32.79<br>(20.00-46.58) | 73.63<br>(63.65-82.78)                                                                                           | 75.02<br>(65.23-84.05) | 81.90<br>(75.16-87.99) |
| Niger                 | 32.72<br>(31.49-33.96)                                                                     | 32.48<br>(31.25-33.74) | 35.30<br>(33.96-36.62) | 3.37<br>(0.91-6.54)                                                            | 3.03<br>(0.67-6.11)    | 2.66<br>(0.68-5.43)    | 32.95<br>(21.31-45.44)                                                                        | 33.19<br>(19.37-46.14) | 32.75<br>(19.81-46.56) | 73.15<br>(66.03-79.80)                                                                                           | 76.02<br>(69.07-82.09) | 96.62<br>(92.92-97.83) |
| Nigeria               | 36.50<br>(35.22-37.85)                                                                     | 36.90<br>(35.62-38.16) | 37.51<br>(35.91-39.05) | 1.89<br>(0.90-3.81)                                                            | 1.64<br>(0.73-3.58)    | 2.50<br>(1.18-4.51)    | 33.54<br>(25.68-42.25)                                                                        | 33.34<br>(21.89-43.25) | 33.31<br>(22.62-42.94) | 43.06<br>(26.65-56.48)                                                                                           | 49.64<br>(34.86-62.11) | 55.66<br>(43.58-65.93) |
| Sao Tome and Principe | 44.89<br>(43.64-46.14)                                                                     | 46.03<br>(44.78-47.29) | 47.45<br>(45.94-48.86) | 15.22<br>(13.86-17.01)                                                         | 15.26<br>(13.91-17.04) | 15.23<br>(13.66-17.21) | 32.96<br>(21.56-45.26)                                                                        | 33.22<br>(19.59-46.04) | 32.77<br>(19.93-46.67) | 62.51<br>(54.23-69.59)                                                                                           | 73.52<br>(67.18-79.16) | 63.01<br>(54.79-70.69) |
| Senegal               | 29.27<br>(28.05-30.64)                                                                     | 30.53<br>(29.20-31.91) | 32.83<br>(31.59-34.08) | 4.02<br>(2.54-5.98)                                                            | 3.67<br>(2.25-5.63)    | 10.88<br>(9.17-12.75)  | 32.98<br>(21.68-45.24)                                                                        | 33.19<br>(19.33-46.00) | 32.75<br>(19.86-46.57) | 76.92<br>(71.39-81.56)                                                                                           | 80.00<br>(75.22-84.08) | 89.25<br>(85.76-91.68) |

**Appendix Table 1a. Scaled values for each SDG health-related indicator and three summary indicators by country for 1990, 2000, and 2015**

| Location     | Indicator 3.3.2: Age-standardised rate of new and relapsed TB cases (per 1,000 population) |                        |                        | Indicator 3.3.3: Age-standardised rate of malaria cases (per 1,000 population) |                        |                        | Indicator 3.3.4: Age-standardised rate of hepatitis B incident cases (per 100,000 population) |                        |                        | Indicator 3.3.5: Age-standardised prevalence rate of neglected tropical diseases (NTDs) (per 100,000 population) |                        |                        |
|--------------|--------------------------------------------------------------------------------------------|------------------------|------------------------|--------------------------------------------------------------------------------|------------------------|------------------------|-----------------------------------------------------------------------------------------------|------------------------|------------------------|------------------------------------------------------------------------------------------------------------------|------------------------|------------------------|
|              | 1990                                                                                       | 2000                   | 2015                   | 1990                                                                           | 2000                   | 2015                   | 1990                                                                                          | 2000                   | 2015                   | 1990                                                                                                             | 2000                   | 2015                   |
| Sierra Leone | 36.18<br>(34.97-37.46)                                                                     | 34.38<br>(33.17-35.68) | 36.46<br>(35.19-37.69) | 2.00<br>(0.31-4.56)                                                            | 1.44<br>(0.12-3.89)    | 2.00<br>(0.68-4.69)    | 33.21<br>(24.83-41.88)                                                                        | 33.56<br>(23.02-43.31) | 33.89<br>(23.02-43.78) | 12.59<br>(0.00-39.92)                                                                                            | 21.62<br>(6.12-48.60)  | 77.91<br>(66.93-82.39) |
| Togo         | 39.25<br>(37.99-40.62)                                                                     | 37.70<br>(36.43-39.08) | 41.46<br>(40.18-42.71) | 1.23<br>(0.14-3.37)                                                            | 1.19<br>(0.14-3.26)    | 1.77<br>(1.05-3.51)    | 32.97<br>(21.61-45.21)                                                                        | 33.18<br>(19.31-46.02) | 32.76<br>(19.89-46.71) | 63.51<br>(46.67-76.72)                                                                                           | 66.99<br>(50.61-79.91) | 92.17<br>(85.07-94.45) |
| Burundi      | 26.61<br>(25.31-27.92)                                                                     | 25.60<br>(24.38-26.89) | 34.45<br>(33.22-35.69) | 1.94<br>(0.44-4.21)                                                            | 1.76<br>(0.48-3.86)    | 6.38<br>(4.58-8.67)    | 35.12<br>(27.33-43.54)                                                                        | 34.99<br>(24.79-44.62) | 35.28<br>(24.78-44.99) | 31.12<br>(0.00-54.14)                                                                                            | 38.22<br>(8.01-60.51)  | 79.02<br>(71.01-83.86) |
| Comoros      | 37.59<br>(36.26-38.94)                                                                     | 40.55<br>(39.31-41.80) | 44.10<br>(42.72-45.57) | 9.57<br>(8.23-11.19)                                                           | 9.92<br>(8.66-11.59)   | 10.31<br>(8.97-12.02)  | 31.34<br>(15.37-47.64)                                                                        | 31.43<br>(14.96-48.94) | 31.03<br>(14.90-48.19) | 59.93<br>(51.26-67.21)                                                                                           | 70.50<br>(64.63-75.79) | 66.91<br>(59.43-73.31) |
| Djibouti     | 35.80<br>(34.37-37.16)                                                                     | 33.30<br>(31.99-34.61) | 33.98<br>(32.58-35.35) | 25.40<br>(16.22-35.30)                                                         | 23.05<br>(14.86-32.19) | 30.14<br>(19.95-43.49) | 31.34<br>(15.25-47.69)                                                                        | 31.43<br>(15.08-48.92) | 31.03<br>(14.94-48.20) | 65.78<br>(37.75-82.97)                                                                                           | 70.41<br>(43.39-86.81) | 66.29<br>(38.66-83.56) |
| Eritrea      | 34.13<br>(32.88-35.49)                                                                     | 34.26<br>(32.86-35.66) | 36.62<br>(35.33-37.89) | 12.07<br>(10.23-14.24)                                                         | 12.08<br>(10.25-14.24) | 17.63<br>(10.55-24.34) | 31.36<br>(15.30-47.65)                                                                        | 31.44<br>(15.01-49.04) | 31.04<br>(14.97-48.26) | 56.23<br>(33.40-75.56)                                                                                           | 61.34<br>(39.01-80.38) | 63.86<br>(45.81-79.11) |
| Ethiopia     | 23.84<br>(22.65-25.16)                                                                     | 23.72<br>(22.48-25.18) | 31.82<br>(30.48-33.18) | 11.08<br>(8.19-14.58)                                                          | 11.12<br>(8.22-14.63)  | 24.85<br>(22.62-27.23) | 35.23<br>(27.81-43.65)                                                                        | 35.95<br>(25.74-44.94) | 35.87<br>(25.37-45.20) | 51.90<br>(41.36-61.73)                                                                                           | 59.38<br>(49.21-68.00) | 54.80<br>(44.09-63.85) |
| Kenya        | 38.21<br>(35.93-40.38)                                                                     | 30.90<br>(28.82-32.83) | 36.80<br>(34.77-39.05) | 4.95<br>(3.75-6.85)                                                            | 4.52<br>(3.42-6.38)    | 6.89<br>(3.97-10.11)   | 41.97<br>(35.07-49.26)                                                                        | 41.44<br>(32.61-49.87) | 41.37<br>(31.77-49.72) | 63.91<br>(52.06-74.30)                                                                                           | 67.04<br>(55.44-77.27) | 75.07<br>(66.24-81.89) |
| Madagascar   | 37.47<br>(36.06-38.96)                                                                     | 39.30<br>(37.93-40.73) | 41.28<br>(39.72-42.84) | 5.96<br>(4.17-8.30)                                                            | 5.58<br>(3.92-7.83)    | 9.27<br>(7.69-11.07)   | 31.35<br>(15.33-47.66)                                                                        | 31.45<br>(15.04-49.00) | 31.04<br>(14.99-48.21) | 7.55<br>(0.00-26.97)                                                                                             | 16.27<br>(7.01-35.07)  | 56.61<br>(46.90-66.31) |
| Malawi       | 27.78<br>(26.51-29.10)                                                                     | 20.75<br>(19.70-21.93) | 28.19<br>(26.92-29.55) | 1.54<br>(0.51-3.34)                                                            | 1.60<br>(0.57-3.41)    | 3.85<br>(2.53-5.72)    | 36.92<br>(28.92-45.63)                                                                        | 36.48<br>(25.21-46.18) | 36.90<br>(26.20-46.51) | 40.61<br>(21.89-56.65)                                                                                           | 47.20<br>(30.47-62.34) | 87.08<br>(78.09-91.18) |
| Mozambique   | 32.08<br>(30.69-33.48)                                                                     | 25.07<br>(23.95-26.37) | 23.75<br>(22.52-24.95) | 0.88<br>(0.34-2.67)                                                            | 0.82<br>(0.31-2.64)    | 2.80<br>(1.74-4.82)    | 36.81<br>(29.02-44.92)                                                                        | 36.94<br>(26.02-46.64) | 36.90<br>(25.87-46.34) | 29.67<br>(14.38-42.83)                                                                                           | 33.06<br>(18.27-45.75) | 58.80<br>(47.29-66.71) |

**Appendix Table 1a. Scaled values for each SDG health-related indicator and three summary indicators by country for 1990, 2000, and 2015**

| Location                         | Indicator 3.3.2: Age-standardised rate of new and relapsed TB cases (per 1,000 population) |                        |                        | Indicator 3.3.3: Age-standardised rate of malaria cases (per 1,000 population) |                      |                       | Indicator 3.3.4: Age-standardised rate of hepatitis B incident cases (per 100,000 population) |                        |                        | Indicator 3.3.5: Age-standardised prevalence rate of neglected tropical diseases (NTDs) (per 100,000 population) |                        |                        |
|----------------------------------|--------------------------------------------------------------------------------------------|------------------------|------------------------|--------------------------------------------------------------------------------|----------------------|-----------------------|-----------------------------------------------------------------------------------------------|------------------------|------------------------|------------------------------------------------------------------------------------------------------------------|------------------------|------------------------|
|                                  | 1990                                                                                       | 2000                   | 2015                   | 1990                                                                           | 2000                 | 2015                  | 1990                                                                                          | 2000                   | 2015                   | 1990                                                                                                             | 2000                   | 2015                   |
| Rwanda                           | 29.52<br>(28.20-30.87)                                                                     | 28.22<br>(26.90-29.48) | 39.83<br>(38.48-41.18) | 6.51<br>(2.46-12.05)                                                           | 6.39<br>(2.45-11.82) | 12.88<br>(9.28-16.33) | 31.37<br>(15.28-47.60)                                                                        | 31.50<br>(15.38-49.40) | 31.11<br>(14.95-48.39) | 47.69<br>(18.61-66.59)                                                                                           | 56.78<br>(28.04-75.23) | 60.53<br>(43.78-71.39) |
| Somalia                          | 32.31<br>(31.04-33.66)                                                                     | 30.28<br>(29.05-31.54) | 30.50<br>(29.37-31.77) | 9.35<br>(6.81-11.60)                                                           | 9.13<br>(6.63-11.33) | 11.14<br>(7.98-14.54) | 35.53<br>(28.66-43.57)                                                                        | 36.05<br>(26.67-45.07) | 35.68<br>(25.32-44.92) | 46.02<br>(31.73-58.74)                                                                                           | 52.73<br>(39.44-64.42) | 47.77<br>(33.44-60.08) |
| South Sudan                      | 28.45<br>(27.00-29.77)                                                                     | 26.57<br>(25.32-27.91) | 28.02<br>(26.72-29.34) | 4.12<br>(2.06-7.33)                                                            | 3.40<br>(1.66-6.20)  | 6.30<br>(2.91-9.94)   | 31.35<br>(15.29-47.65)                                                                        | 31.45<br>(15.03-48.96) | 31.04<br>(15.00-48.20) | 50.19<br>(38.70-60.92)                                                                                           | 52.99<br>(41.65-62.58) | 57.61<br>(47.09-66.88) |
| Tanzania                         | 29.05<br>(27.84-30.27)                                                                     | 25.24<br>(24.05-26.55) | 29.02<br>(27.77-30.28) | 2.81<br>(1.43-4.68)                                                            | 2.41<br>(1.26-4.19)  | 6.64<br>(5.21-8.46)   | 35.91<br>(28.58-43.85)                                                                        | 35.74<br>(25.36-45.20) | 35.27<br>(24.03-44.61) | 47.87<br>(37.09-57.14)                                                                                           | 54.68<br>(44.82-62.92) | 71.42<br>(63.72-77.24) |
| Uganda                           | 26.94<br>(25.63-28.30)                                                                     | 21.99<br>(20.88-23.30) | 29.16<br>(27.88-30.52) | 1.18<br>(0.38-3.12)                                                            | 1.16<br>(0.38-3.11)  | 5.35<br>(3.35-8.08)   | 33.46<br>(25.41-42.12)                                                                        | 33.54<br>(22.77-43.05) | 33.00<br>(22.23-42.39) | 57.26<br>(44.76-67.48)                                                                                           | 65.79<br>(54.97-74.42) | 85.46<br>(79.92-89.21) |
| Zambia                           | 25.51<br>(24.11-26.96)                                                                     | 18.39<br>(17.32-19.57) | 23.99<br>(22.82-25.21) | 2.52<br>(1.39-4.29)                                                            | 2.15<br>(1.14-3.88)  | 4.85<br>(3.61-6.81)   | 35.30<br>(28.32-43.24)                                                                        | 35.29<br>(25.36-44.48) | 35.07<br>(24.44-44.22) | 55.14<br>(43.83-65.81)                                                                                           | 61.75<br>(51.75-70.98) | 57.03<br>(46.11-66.96) |
| Angola                           | 24.01<br>(22.73-25.22)                                                                     | 25.26<br>(24.10-26.52) | 27.73<br>(26.45-28.98) | 4.57<br>(2.64-7.20)                                                            | 3.71<br>(2.04-6.09)  | 6.60<br>(4.52-9.31)   | 32.19<br>(20.57-44.44)                                                                        | 32.19<br>(18.82-45.11) | 31.96<br>(19.26-45.35) | 44.01<br>(23.54-59.17)                                                                                           | 51.07<br>(31.56-65.69) | 51.12<br>(33.81-64.01) |
| Central African Republic         | 23.45<br>(22.34-24.71)                                                                     | 20.16<br>(19.10-21.39) | 24.16<br>(23.04-25.30) | 1.79<br>(0.30-4.39)                                                            | 1.31<br>(0.14-3.80)  | 3.01<br>(0.68-6.54)   | 34.06<br>(26.07-42.59)                                                                        | 34.06<br>(23.70-43.78) | 34.00<br>(23.46-43.68) | 54.38<br>(44.26-62.73)                                                                                           | 62.11<br>(53.04-69.28) | 68.06<br>(61.52-73.78) |
| Congo                            | 25.26<br>(24.05-26.55)                                                                     | 26.76<br>(25.46-28.05) | 32.86<br>(31.44-34.18) | 3.11<br>(1.50-5.16)                                                            | 2.44<br>(1.02-4.36)  | 4.29<br>(2.39-6.62)   | 33.75<br>(25.74-42.44)                                                                        | 34.42<br>(23.95-43.80) | 34.25<br>(23.66-43.86) | 40.41<br>(23.05-54.77)                                                                                           | 49.59<br>(31.93-62.75) | 43.02<br>(25.37-56.60) |
| Democratic Republic of the Congo | 28.07<br>(26.85-29.32)                                                                     | 27.83<br>(26.59-29.13) | 29.58<br>(28.03-31.07) | 1.09<br>(0.40-3.07)                                                            | 1.03<br>(0.36-3.01)  | 3.33<br>(2.35-5.19)   | 32.20<br>(20.62-44.40)                                                                        | 32.20<br>(18.80-45.11) | 31.96<br>(19.26-45.35) | 35.49<br>(17.13-50.15)                                                                                           | 45.24<br>(27.85-58.42) | 46.55<br>(31.62-58.53) |
| Equatorial Guinea                | 30.18<br>(28.92-31.40)                                                                     | 27.93<br>(26.74-29.24) | 27.60<br>(26.18-28.98) | 1.75<br>(0.81-3.87)                                                            | 1.78<br>(0.85-3.90)  | 2.29<br>(0.30-5.24)   | 32.18<br>(20.50-44.94)                                                                        | 32.18<br>(18.85-45.02) | 31.94<br>(19.26-45.42) | 57.09<br>(48.87-64.13)                                                                                           | 65.40<br>(58.92-71.13) | 60.73<br>(52.93-67.25) |

**Appendix Table 1a. Scaled values for each SDG health-related indicator and three summary indicators by country for 1990, 2000, and 2015**

| Location | Indicator 3.3.2: Age-standardised rate of new and relapsed TB cases (per 1,000 population) |                        |                        | Indicator 3.3.3: Age-standardised rate of malaria cases (per 1,000 population) |                     |                     | Indicator 3.3.4: Age-standardised rate of hepatitis B incident cases (per 100,000 population) |                        |                        | Indicator 3.3.5: Age-standardised prevalence rate of neglected tropical diseases (NTDs) (per 100,000 population) |                        |                        |
|----------|--------------------------------------------------------------------------------------------|------------------------|------------------------|--------------------------------------------------------------------------------|---------------------|---------------------|-----------------------------------------------------------------------------------------------|------------------------|------------------------|------------------------------------------------------------------------------------------------------------------|------------------------|------------------------|
|          | 1990                                                                                       | 2000                   | 2015                   | 1990                                                                           | 2000                | 2015                | 1990                                                                                          | 2000                   | 2015                   | 1990                                                                                                             | 2000                   | 2015                   |
| Gabon    | 25.85<br>(24.60-27.14)                                                                     | 22.61<br>(21.30-23.77) | 28.02<br>(26.68-29.32) | 2.40<br>(1.06-4.46)                                                            | 2.07<br>(0.93-4.06) | 4.85<br>(1.82-9.08) | 33.16<br>(25.31-41.53)                                                                        | 33.27<br>(22.95-42.94) | 33.32<br>(22.42-43.08) | 34.06<br>(14.28-50.76)                                                                                           | 39.76<br>(20.84-55.64) | 34.69<br>(15.19-51.27) |

**Appendix Table 1a. Scaled values for each SDG health-related indicator and three summary indicators by country for 1990, 2000, and 2015**

| Location      | Indicator 3.4.1: Death rate due to cardiovascular disease, cancer, diabetes, and chronic respiratory disease among populations aged 30 to 70 (per 100,000 population) |                        |                         | Indicator 3.4.2: Age-standardised death rate due to self-harm (per 100,000 population) |                        |                        | Indicator 3.5.2: Risk-weighted prevalence of alcohol consumption, as measured by the summary exposure value (SEV) for alcohol use |                        |                        | Indicator 3.6.1: Age-standardised death rate due to road injuries (per 100,000 population) |                        |                        |
|---------------|-----------------------------------------------------------------------------------------------------------------------------------------------------------------------|------------------------|-------------------------|----------------------------------------------------------------------------------------|------------------------|------------------------|-----------------------------------------------------------------------------------------------------------------------------------|------------------------|------------------------|--------------------------------------------------------------------------------------------|------------------------|------------------------|
|               | 1990                                                                                                                                                                  | 2000                   | 2015                    | 1990                                                                                   | 2000                   | 2015                   | 1990                                                                                                                              | 2000                   | 2015                   | 1990                                                                                       | 2000                   | 2015                   |
| Canada        | 60.37<br>(55.77-64.26)                                                                                                                                                | 69.74<br>(64.90-73.14) | 82.16<br>(76.29-85.41)  | 46.77<br>(42.82-53.62)                                                                 | 49.20<br>(45.30-55.62) | 53.68<br>(49.54-59.61) | 56.51<br>(54.05-58.57)                                                                                                            | 59.24<br>(57.24-61.15) | 56.21<br>(53.38-59.22) | 57.53<br>(53.67-61.58)                                                                     | 67.76<br>(64.24-71.34) | 78.86<br>(75.48-82.08) |
| United States | 52.37<br>(47.98-56.68)                                                                                                                                                | 59.54<br>(55.10-63.44) | 69.39<br>(64.58-72.88)  | 48.72<br>(44.95-55.26)                                                                 | 52.15<br>(48.46-58.08) | 49.49<br>(45.56-55.84) | 53.47<br>(50.93-55.88)                                                                                                            | 54.63<br>(52.10-57.10) | 53.94<br>(49.89-58.77) | 50.69<br>(46.66-55.25)                                                                     | 54.98<br>(51.05-59.18) | 64.03<br>(60.54-67.53) |
| Australia     | 59.60<br>(55.11-63.44)                                                                                                                                                | 74.36<br>(68.98-77.63) | 87.50<br>(80.89-90.53)  | 47.12<br>(43.19-53.99)                                                                 | 48.64<br>(44.70-55.33) | 55.05<br>(51.09-60.49) | 48.91<br>(46.07-51.59)                                                                                                            | 58.30<br>(56.07-60.53) | 53.78<br>(50.50-57.25) | 56.00<br>(51.87-60.16)                                                                     | 67.12<br>(63.53-70.63) | 79.17<br>(75.83-82.25) |
| New Zealand   | 52.64<br>(48.19-56.93)                                                                                                                                                | 64.93<br>(60.27-68.69) | 80.89<br>(74.40-84.30)  | 45.82<br>(41.90-52.99)                                                                 | 47.50<br>(43.51-54.23) | 53.26<br>(49.23-58.91) | 52.93<br>(50.44-55.18)                                                                                                            | 57.97<br>(55.99-59.95) | 55.98<br>(53.08-59.07) | 46.94<br>(42.57-51.89)                                                                     | 61.06<br>(57.25-64.99) | 75.65<br>(71.93-78.98) |
| Brunei        | 47.58<br>(42.90-52.39)                                                                                                                                                | 55.28<br>(50.66-59.59) | 61.39<br>(55.85-66.01)  | 75.12<br>(68.49-80.77)                                                                 | 79.26<br>(74.25-83.33) | 78.88<br>(74.23-83.04) | 66.04<br>(61.51-69.89)                                                                                                            | 68.98<br>(65.19-72.58) | 69.98<br>(67.04-73.25) | 40.46<br>(34.31-47.06)                                                                     | 49.57<br>(45.07-54.73) | 60.95<br>(56.19-65.77) |
| Japan         | 72.77<br>(67.61-76.08)                                                                                                                                                | 79.11<br>(73.33-82.28) | 89.92<br>(82.91-92.99)  | 40.34<br>(36.54-47.92)                                                                 | 36.00<br>(32.22-44.39) | 36.47<br>(32.53-45.02) | 62.52<br>(60.69-64.17)                                                                                                            | 61.50<br>(59.62-63.43) | 64.06<br>(61.04-67.03) | 65.21<br>(61.78-68.76)                                                                     | 73.88<br>(70.79-76.84) | 90.64<br>(88.36-92.79) |
| Singapore     | 48.36<br>(44.03-52.93)                                                                                                                                                | 64.53<br>(59.84-68.31) | 85.24<br>(78.75-88.88)  | 39.83<br>(35.71-47.85)                                                                 | 49.50<br>(45.50-55.89) | 58.54<br>(54.32-63.70) | 88.14<br>(87.03-89.24)                                                                                                            | 88.34<br>(87.15-89.40) | 86.52<br>(85.08-87.80) | 65.62<br>(61.91-69.27)                                                                     | 80.66<br>(77.55-83.50) | 93.31<br>(90.41-96.07) |
| South Korea   | 45.85<br>(41.34-50.79)                                                                                                                                                | 62.56<br>(58.03-66.35) | 84.67<br>(77.57-88.94)  | 49.77<br>(45.84-55.92)                                                                 | 34.78<br>(30.61-43.41) | 25.17<br>(20.38-35.97) | 67.71<br>(65.33-69.82)                                                                                                            | 63.13<br>(61.07-64.88) | 61.82<br>(59.27-64.34) | 28.22<br>(22.44-35.38)                                                                     | 39.79<br>(34.90-45.96) | 61.51<br>(56.87-65.97) |
| Andorra       | 84.05<br>(79.87-87.98)                                                                                                                                                | 93.13<br>(89.86-96.10) | 99.49<br>(95.96-100.00) | 62.09<br>(53.48-77.61)                                                                 | 65.79<br>(56.67-79.96) | 66.32<br>(56.84-76.30) | 27.66<br>(19.99-39.07)                                                                                                            | 28.80<br>(23.83-34.73) | 42.22<br>(35.59-50.73) | 74.73<br>(66.74-86.93)                                                                     | 84.39<br>(77.05-94.26) | 94.03<br>(88.13-99.71) |
| Austria       | 57.42<br>(53.11-61.44)                                                                                                                                                | 66.37<br>(61.57-69.99) | 80.44<br>(74.47-83.71)  | 33.02<br>(28.93-41.89)                                                                 | 39.86<br>(35.88-47.76) | 49.22<br>(45.25-55.70) | 32.40<br>(28.43-36.67)                                                                                                            | 35.26<br>(31.35-39.60) | 38.18<br>(31.11-46.61) | 52.89<br>(48.79-57.33)                                                                     | 65.18<br>(61.58-68.78) | 83.36<br>(80.06-86.56) |
| Belgium       | 57.41<br>(53.06-61.47)                                                                                                                                                | 65.72<br>(61.18-69.39) | 76.87<br>(71.76-80.66)  | 37.06<br>(33.08-45.30)                                                                 | 35.67<br>(31.75-44.13) | 40.60<br>(36.09-48.62) | 49.03<br>(46.45-51.35)                                                                                                            | 52.52<br>(48.93-56.11) | 46.72<br>(40.44-54.14) | 48.94<br>(44.88-53.82)                                                                     | 55.25<br>(51.24-59.57) | 72.88<br>(69.29-76.23) |

**Appendix Table 1a. Scaled values for each SDG health-related indicator and three summary indicators by country for 1990, 2000, and 2015**

| Location   | Indicator 3.4.1: Death rate due to cardiovascular disease, cancer, diabetes, and chronic respiratory disease among populations aged 30 to 70 (per 100,000 population) |                        |                        | Indicator 3.4.2: Age-standardised death rate due to self-harm (per 100,000 population) |                        |                        | Indicator 3.5.2: Risk-weighted prevalence of alcohol consumption, as measured by the summary exposure value (SEV) for alcohol use |                        |                        | Indicator 3.6.1: Age-standardised death rate due to road injuries (per 100,000 population) |                        |                        |
|------------|-----------------------------------------------------------------------------------------------------------------------------------------------------------------------|------------------------|------------------------|----------------------------------------------------------------------------------------|------------------------|------------------------|-----------------------------------------------------------------------------------------------------------------------------------|------------------------|------------------------|--------------------------------------------------------------------------------------------|------------------------|------------------------|
|            | 1990                                                                                                                                                                  | 2000                   | 2015                   | 1990                                                                                   | 2000                   | 2015                   | 1990                                                                                                                              | 2000                   | 2015                   | 1990                                                                                       | 2000                   | 2015                   |
| Cyprus     | 62.84<br>(58.13-66.51)                                                                                                                                                | 63.81<br>(59.19-67.64) | 82.78<br>(76.62-86.08) | 81.89<br>(77.45-85.50)                                                                 | 80.71<br>(75.81-84.24) | 87.01<br>(82.50-90.54) | 53.89<br>(50.85-57.24)                                                                                                            | 56.88<br>(53.55-60.47) | 57.31<br>(52.27-63.36) | 46.03<br>(41.19-51.66)                                                                     | 49.64<br>(45.51-54.36) | 70.28<br>(66.88-73.77) |
| Denmark    | 50.30<br>(45.82-54.82)                                                                                                                                                | 59.90<br>(55.57-63.88) | 77.59<br>(71.81-80.99) | 27.96<br>(23.74-38.32)                                                                 | 44.83<br>(40.64-51.91) | 54.74<br>(50.54-60.44) | 35.12<br>(31.32-39.15)                                                                                                            | 30.53<br>(25.90-35.04) | 38.96<br>(30.69-48.96) | 59.97<br>(56.14-63.93)                                                                     | 69.57<br>(66.12-72.84) | 87.82<br>(84.61-90.71) |
| Finland    | 55.03<br>(50.67-59.26)                                                                                                                                                | 68.89<br>(64.26-72.42) | 82.10<br>(76.09-85.54) | 24.61<br>(20.57-35.62)                                                                 | 32.22<br>(28.15-41.56) | 42.54<br>(37.99-50.11) | 48.26<br>(45.29-51.34)                                                                                                            | 48.15<br>(45.00-51.29) | 47.61<br>(42.12-53.90) | 59.10<br>(55.23-63.10)                                                                     | 73.15<br>(69.88-76.41) | 88.89<br>(85.81-91.85) |
| France     | 64.22<br>(59.71-67.89)                                                                                                                                                | 69.74<br>(64.90-73.15) | 78.77<br>(73.31-82.07) | 30.94<br>(26.78-40.66)                                                                 | 36.39<br>(32.39-44.91) | 41.12<br>(36.65-48.70) | 39.70<br>(36.50-42.54)                                                                                                            | 48.20<br>(45.23-50.74) | 52.62<br>(48.20-57.34) | 48.83<br>(44.56-53.75)                                                                     | 58.83<br>(54.92-62.90) | 77.88<br>(75.05-80.63) |
| Germany    | 53.71<br>(49.29-57.94)                                                                                                                                                | 64.35<br>(59.92-68.10) | 77.36<br>(71.98-80.55) | 44.65<br>(40.72-51.85)                                                                 | 48.06<br>(44.11-54.72) | 54.55<br>(50.54-60.18) | 41.57<br>(38.51-44.28)                                                                                                            | 47.09<br>(44.30-49.53) | 54.02<br>(50.17-58.24) | 58.99<br>(55.05-62.90)                                                                     | 69.02<br>(65.56-72.47) | 87.58<br>(84.76-90.15) |
| Greece     | 63.54<br>(58.90-67.25)                                                                                                                                                | 68.29<br>(63.57-71.87) | 74.72<br>(69.33-78.22) | 82.85<br>(78.99-85.87)                                                                 | 87.44<br>(83.82-90.14) | 87.17<br>(83.04-90.13) | 43.64<br>(40.28-46.76)                                                                                                            | 50.31<br>(46.95-53.24) | 52.58<br>(46.52-59.17) | 46.90<br>(42.46-51.82)                                                                     | 52.07<br>(48.11-56.65) | 66.78<br>(62.96-70.34) |
| Iceland    | 65.25<br>(60.47-69.08)                                                                                                                                                | 75.81<br>(70.28-79.38) | 91.35<br>(84.55-95.20) | 46.52<br>(42.41-53.45)                                                                 | 53.05<br>(48.85-58.99) | 59.57<br>(55.19-64.47) | 69.08<br>(66.09-72.39)                                                                                                            | 69.84<br>(67.28-72.58) | 62.12<br>(56.11-69.31) | 68.27<br>(64.75-71.89)                                                                     | 80.46<br>(77.48-83.45) | 96.15<br>(93.38-98.84) |
| Ireland    | 55.05<br>(49.85-59.73)                                                                                                                                                | 62.59<br>(57.93-66.69) | 82.13<br>(74.77-85.88) | 51.62<br>(47.32-57.91)                                                                 | 49.20<br>(45.31-55.48) | 56.19<br>(52.00-61.72) | 48.63<br>(45.71-51.43)                                                                                                            | 44.40<br>(41.53-47.23) | 49.09<br>(44.52-54.17) | 58.37<br>(53.95-62.84)                                                                     | 68.55<br>(64.96-72.16) | 92.26<br>(89.34-94.96) |
| Israel     | 58.48<br>(54.18-62.56)                                                                                                                                                | 68.56<br>(63.80-72.07) | 86.00<br>(79.17-89.36) | 58.81<br>(54.90-63.88)                                                                 | 56.59<br>(52.57-62.13) | 64.51<br>(60.35-68.94) | 89.79<br>(88.86-90.71)                                                                                                            | 89.69<br>(88.83-90.57) | 86.92<br>(84.72-89.28) | 63.38<br>(59.53-67.02)                                                                     | 61.86<br>(57.86-65.75) | 76.88<br>(73.29-80.07) |
| Italy      | 60.72<br>(56.10-64.56)                                                                                                                                                | 72.13<br>(67.08-75.42) | 84.90<br>(78.16-87.95) | 62.66<br>(58.96-67.45)                                                                 | 66.43<br>(62.70-70.65) | 70.92<br>(67.05-74.72) | 50.17<br>(46.99-53.30)                                                                                                            | 56.22<br>(52.99-59.28) | 68.43<br>(62.67-74.64) | 53.05<br>(49.07-57.39)                                                                     | 58.10<br>(54.27-62.12) | 74.78<br>(71.28-78.17) |
| Luxembourg | 53.69<br>(49.22-57.90)                                                                                                                                                | 66.85<br>(62.58-70.58) | 84.27<br>(77.72-87.86) | 40.73<br>(36.65-48.48)                                                                 | 48.34<br>(44.38-54.89) | 59.07<br>(54.87-64.12) | 42.58<br>(39.73-45.12)                                                                                                            | 46.97<br>(44.25-49.52) | 52.62<br>(47.94-57.80) | 50.16<br>(45.85-54.90)                                                                     | 63.45<br>(59.78-67.44) | 85.11<br>(82.01-87.84) |

**Appendix Table 1a. Scaled values for each SDG health-related indicator and three summary indicators by country for 1990, 2000, and 2015**

| Location       | Indicator 3.4.1: Death rate due to cardiovascular disease, cancer, diabetes, and chronic respiratory disease among populations aged 30 to 70 (per 100,000 population) |                        |                        | Indicator 3.4.2: Age-standardised death rate due to self-harm (per 100,000 population) |                        |                        | Indicator 3.5.2: Risk-weighted prevalence of alcohol consumption, as measured by the summary exposure value (SEV) for alcohol use |                        |                        | Indicator 3.6.1: Age-standardised death rate due to road injuries (per 100,000 population) |                        |                         |
|----------------|-----------------------------------------------------------------------------------------------------------------------------------------------------------------------|------------------------|------------------------|----------------------------------------------------------------------------------------|------------------------|------------------------|-----------------------------------------------------------------------------------------------------------------------------------|------------------------|------------------------|--------------------------------------------------------------------------------------------|------------------------|-------------------------|
|                | 1990                                                                                                                                                                  | 2000                   | 2015                   | 1990                                                                                   | 2000                   | 2015                   | 1990                                                                                                                              | 2000                   | 2015                   | 1990                                                                                       | 2000                   | 2015                    |
| Malta          | 60.20<br>(55.32-64.34)                                                                                                                                                | 69.32<br>(64.21-73.36) | 84.49<br>(77.94-88.15) | 75.61<br>(71.53-79.19)                                                                 | 77.34<br>(73.36-80.89) | 82.14<br>(78.27-85.50) | 67.70<br>(65.49-69.96)                                                                                                            | 71.51<br>(69.03-74.10) | 62.24<br>(56.90-68.10) | 77.09<br>(73.94-80.35)                                                                     | 83.80<br>(80.91-86.75) | 99.93<br>(99.15-100.00) |
| Netherlands    | 57.55<br>(53.19-61.52)                                                                                                                                                | 63.74<br>(59.34-67.52) | 79.78<br>(74.15-83.54) | 51.59<br>(47.84-57.69)                                                                 | 54.50<br>(50.76-60.25) | 56.90<br>(52.80-62.27) | 51.42<br>(48.56-54.19)                                                                                                            | 52.97<br>(50.25-55.62) | 55.29<br>(49.69-61.68) | 67.00<br>(63.48-70.64)                                                                     | 73.08<br>(69.82-76.14) | 89.89<br>(87.12-92.52)  |
| Norway         | 59.66<br>(54.99-63.72)                                                                                                                                                | 69.38<br>(64.65-72.88) | 86.29<br>(79.64-89.64) | 42.88<br>(38.86-50.26)                                                                 | 48.10<br>(44.11-54.91) | 57.08<br>(52.81-62.48) | 67.20<br>(64.67-69.68)                                                                                                            | 65.80<br>(63.20-68.37) | 63.58<br>(57.80-69.96) | 68.72<br>(65.18-72.25)                                                                     | 74.54<br>(71.48-77.54) | 94.81<br>(91.82-97.46)  |
| Portugal       | 56.60<br>(52.29-60.73)                                                                                                                                                | 64.86<br>(60.35-68.53) | 79.24<br>(73.56-82.50) | 44.68<br>(40.79-51.93)                                                                 | 53.66<br>(49.80-59.71) | 56.53<br>(52.26-62.03) | 43.20<br>(40.16-46.01)                                                                                                            | 48.57<br>(45.77-51.16) | 53.56<br>(48.77-58.82) | 33.88<br>(28.82-40.42)                                                                     | 47.61<br>(43.47-52.61) | 72.04<br>(68.35-75.50)  |
| Spain          | 64.38<br>(59.85-68.01)                                                                                                                                                | 71.35<br>(66.38-74.74) | 85.77<br>(79.52-88.91) | 62.12<br>(58.13-66.94)                                                                 | 64.00<br>(60.18-68.61) | 68.82<br>(64.75-72.84) | 48.08<br>(45.23-50.70)                                                                                                            | 53.91<br>(51.30-56.31) | 57.31<br>(52.77-62.84) | 46.25<br>(41.58-51.25)                                                                     | 57.70<br>(53.84-61.89) | 86.47<br>(84.03-88.87)  |
| Sweden         | 64.52<br>(60.05-68.21)                                                                                                                                                | 73.82<br>(68.83-77.17) | 87.49<br>(80.56-90.73) | 38.40<br>(34.35-46.75)                                                                 | 46.25<br>(42.38-53.25) | 50.59<br>(46.46-56.81) | 57.88<br>(54.76-61.15)                                                                                                            | 54.80<br>(51.40-58.20) | 56.84<br>(50.51-63.95) | 69.09<br>(65.82-72.57)                                                                     | 80.88<br>(78.12-83.67) | 93.86<br>(91.12-96.17)  |
| Switzerland    | 66.37<br>(61.65-70.06)                                                                                                                                                | 75.90<br>(70.42-79.15) | 92.07<br>(84.09-95.75) | 31.95<br>(28.14-41.53)                                                                 | 38.64<br>(34.93-46.92) | 50.18<br>(46.04-56.70) | 39.93<br>(36.76-43.02)                                                                                                            | 46.88<br>(43.81-50.04) | 50.92<br>(45.11-57.70) | 58.60<br>(54.73-62.89)                                                                     | 74.97<br>(71.68-78.09) | 93.18<br>(90.36-95.85)  |
| United Kingdom | 50.77<br>(46.31-55.25)                                                                                                                                                | 62.92<br>(58.36-66.63) | 78.38<br>(72.86-81.39) | 56.10<br>(52.38-61.46)                                                                 | 58.94<br>(55.31-64.13) | 64.18<br>(60.15-68.39) | 56.12<br>(47.37-66.97)                                                                                                            | 56.75<br>(47.60-67.98) | 57.46<br>(48.60-68.24) | 71.11<br>(67.87-74.31)                                                                     | 78.49<br>(75.66-81.21) | 94.24<br>(91.79-96.46)  |
| Argentina      | 46.90<br>(42.30-51.60)                                                                                                                                                | 52.93<br>(48.35-57.23) | 60.93<br>(56.48-65.02) | 54.08<br>(50.29-59.71)                                                                 | 48.64<br>(44.60-55.18) | 51.75<br>(47.82-57.98) | 50.08<br>(47.06-53.18)                                                                                                            | 58.13<br>(55.40-61.09) | 58.37<br>(53.34-64.12) | 55.90<br>(51.83-60.06)                                                                     | 56.45<br>(52.33-60.57) | 59.20<br>(55.18-63.47)  |
| Chile          | 55.70<br>(51.01-59.94)                                                                                                                                                | 69.24<br>(64.20-72.57) | 78.54<br>(72.04-82.52) | 33.27<br>(29.00-42.47)                                                                 | 47.65<br>(43.41-54.39) | 51.07<br>(46.50-57.57) | 59.30<br>(56.24-62.19)                                                                                                            | 65.15<br>(62.85-67.38) | 59.15<br>(55.16-63.93) | 52.28<br>(48.24-56.74)                                                                     | 56.47<br>(52.35-61.01) | 62.77<br>(58.66-66.90)  |
| Uruguay        | 46.32<br>(41.78-51.14)                                                                                                                                                | 51.76<br>(47.21-56.14) | 59.92<br>(55.08-64.03) | 51.72<br>(48.04-57.91)                                                                 | 40.10<br>(36.31-48.12) | 39.09<br>(34.95-47.19) | 61.29<br>(59.04-63.61)                                                                                                            | 60.14<br>(57.70-62.61) | 62.46<br>(58.83-66.88) | 53.63<br>(49.63-58.16)                                                                     | 54.77<br>(50.63-59.42) | 57.14<br>(52.76-61.68)  |

**Appendix Table 1a. Scaled values for each SDG health-related indicator and three summary indicators by country for 1990, 2000, and 2015**

| Location               | Indicator 3.4.1: Death rate due to cardiovascular disease, cancer, diabetes, and chronic respiratory disease among populations aged 30 to 70 (per 100,000 population) |                        |                        | Indicator 3.4.2: Age-standardised death rate due to self-harm (per 100,000 population) |                        |                        | Indicator 3.5.2: Risk-weighted prevalence of alcohol consumption, as measured by the summary exposure value (SEV) for alcohol use |                        |                        | Indicator 3.6.1: Age-standardised death rate due to road injuries (per 100,000 population) |                        |                        |
|------------------------|-----------------------------------------------------------------------------------------------------------------------------------------------------------------------|------------------------|------------------------|----------------------------------------------------------------------------------------|------------------------|------------------------|-----------------------------------------------------------------------------------------------------------------------------------|------------------------|------------------------|--------------------------------------------------------------------------------------------|------------------------|------------------------|
|                        | 1990                                                                                                                                                                  | 2000                   | 2015                   | 1990                                                                                   | 2000                   | 2015                   | 1990                                                                                                                              | 2000                   | 2015                   | 1990                                                                                       | 2000                   | 2015                   |
| Belarus                | 37.45<br>(32.93-42.87)                                                                                                                                                | 29.73<br>(24.93-35.99) | 36.32<br>(31.26-42.05) | 29.02<br>(24.00-38.77)                                                                 | 14.67<br>(9.68-27.25)  | 21.08<br>(13.52-32.34) | 8.95<br>(6.94-11.19)                                                                                                              | 6.17<br>(3.84-8.73)    | 0.04<br>(0.00-0.52)    | 44.51<br>(39.71-50.10)                                                                     | 43.86<br>(39.15-49.36) | 50.23<br>(44.79-56.61) |
| Estonia                | 37.87<br>(33.44-43.34)                                                                                                                                                | 38.81<br>(34.14-44.08) | 63.05<br>(58.92-66.88) | 24.27<br>(20.20-35.23)                                                                 | 22.08<br>(17.58-33.30) | 45.63<br>(39.88-52.68) | 6.62<br>(1.79-11.76)                                                                                                              | 46.37<br>(43.04-49.83) | 39.87<br>(35.66-44.34) | 40.41<br>(35.22-46.24)                                                                     | 51.08<br>(46.72-55.77) | 83.40<br>(79.09-87.54) |
| Latvia                 | 36.51<br>(31.97-42.09)                                                                                                                                                | 38.58<br>(33.97-43.88) | 50.44<br>(45.80-54.91) | 23.48<br>(19.49-34.67)                                                                 | 22.49<br>(18.01-33.80) | 35.75<br>(31.06-44.56) | 17.03<br>(12.81-21.62)                                                                                                            | 56.22<br>(53.58-58.94) | 50.00<br>(46.18-54.38) | 32.36<br>(26.79-39.12)                                                                     | 41.88<br>(37.18-47.78) | 69.73<br>(65.13-73.96) |
| Lithuania              | 41.84<br>(37.40-47.02)                                                                                                                                                | 45.52<br>(41.02-50.27) | 53.14<br>(48.78-57.60) | 21.06<br>(16.56-32.78)                                                                 | 11.73<br>(6.84-25.10)  | 19.95<br>(14.95-31.75) | 14.58<br>(10.27-18.74)                                                                                                            | 51.01<br>(47.99-53.73) | 41.57<br>(38.03-45.47) | 37.65<br>(32.65-43.67)                                                                     | 45.20<br>(40.70-50.43) | 64.31<br>(59.98-68.41) |
| Moldova                | 37.42<br>(32.85-42.85)                                                                                                                                                | 38.16<br>(33.64-43.61) | 51.46<br>(47.22-56.00) | 37.18<br>(33.32-45.82)                                                                 | 40.99<br>(36.77-48.87) | 45.80<br>(41.39-52.74) | 25.95<br>(18.47-35.61)                                                                                                            | 33.41<br>(25.80-42.48) | 28.66<br>(20.76-38.30) | 39.32<br>(34.43-45.17)                                                                     | 55.60<br>(51.62-59.98) | 69.65<br>(65.66-73.63) |
| Russia                 | 35.22<br>(30.74-40.80)                                                                                                                                                | 26.06<br>(21.00-32.61) | 40.67<br>(36.22-45.86) | 23.53<br>(19.21-34.49)                                                                 | 7.63<br>(3.06-21.75)   | 21.50<br>(16.56-32.48) | 13.16<br>(6.12-22.34)                                                                                                             | 13.98<br>(7.01-22.55)  | 6.93<br>(0.62-14.92)   | 40.15<br>(35.15-45.86)                                                                     | 35.49<br>(30.38-41.72) | 52.53<br>(47.70-57.20) |
| Ukraine                | 37.35<br>(32.76-42.82)                                                                                                                                                | 30.46<br>(25.70-36.52) | 41.57<br>(36.88-46.82) | 32.25<br>(28.11-41.40)                                                                 | 20.54<br>(16.25-32.12) | 33.50<br>(28.61-42.60) | 18.62<br>(15.12-22.50)                                                                                                            | 17.17<br>(13.53-21.07) | 8.10<br>(3.15-13.98)   | 45.38<br>(40.68-50.70)                                                                     | 50.33<br>(46.51-55.23) | 61.82<br>(57.16-66.27) |
| Albania                | 56.72<br>(51.88-60.82)                                                                                                                                                | 58.06<br>(53.22-62.12) | 63.96<br>(58.10-68.68) | 80.08<br>(73.95-83.77)                                                                 | 72.31<br>(68.39-76.31) | 73.69<br>(68.63-79.68) | 83.43<br>(81.97-84.86)                                                                                                            | 77.59<br>(75.97-79.19) | 71.14<br>(68.26-74.29) | 60.24<br>(55.58-65.42)                                                                     | 71.87<br>(67.58-75.55) | 77.64<br>(73.15-81.70) |
| Bosnia and Herzegovina | 46.66<br>(42.14-51.42)                                                                                                                                                | 53.55<br>(49.08-57.93) | 64.38<br>(59.68-68.34) | 45.00<br>(40.17-52.02)                                                                 | 51.62<br>(45.95-58.53) | 75.05<br>(51.75-81.03) | 68.77<br>(66.81-70.40)                                                                                                            | 72.52<br>(70.89-74.09) | 73.87<br>(72.11-75.47) | 74.29<br>(69.47-78.28)                                                                     | 77.32<br>(71.82-82.99) | 88.93<br>(85.09-92.68) |
| Bulgaria               | 39.94<br>(35.43-45.21)                                                                                                                                                | 38.75<br>(34.25-44.13) | 46.70<br>(42.36-51.63) | 42.24<br>(38.18-49.85)                                                                 | 42.63<br>(38.47-50.22) | 53.19<br>(49.24-59.10) | 45.33<br>(42.47-48.14)                                                                                                            | 56.73<br>(54.10-59.12) | 54.85<br>(51.29-58.63) | 56.94<br>(53.05-61.16)                                                                     | 63.44<br>(59.60-67.28) | 71.74<br>(68.00-75.25) |
| Croatia                | 44.37<br>(39.77-49.31)                                                                                                                                                | 48.52<br>(44.12-53.17) | 62.19<br>(57.66-66.04) | 31.85<br>(27.66-41.18)                                                                 | 37.35<br>(33.40-45.94) | 46.98<br>(42.54-53.97) | 47.99<br>(44.95-50.57)                                                                                                            | 49.80<br>(46.80-52.34) | 53.69<br>(50.44-56.95) | 49.44<br>(45.14-54.03)                                                                     | 57.20<br>(53.12-61.34) | 72.10<br>(68.39-75.72) |

**Appendix Table 1a. Scaled values for each SDG health-related indicator and three summary indicators by country for 1990, 2000, and 2015**

| Location       | Indicator 3.4.1: Death rate due to cardiovascular disease, cancer, diabetes, and chronic respiratory disease among populations aged 30 to 70 (per 100,000 population) |                        |                        | Indicator 3.4.2: Age-standardised death rate due to self-harm (per 100,000 population) |                        |                        | Indicator 3.5.2: Risk-weighted prevalence of alcohol consumption, as measured by the summary exposure value (SEV) for alcohol use |                        |                        | Indicator 3.6.1: Age-standardised death rate due to road injuries (per 100,000 population) |                        |                        |
|----------------|-----------------------------------------------------------------------------------------------------------------------------------------------------------------------|------------------------|------------------------|----------------------------------------------------------------------------------------|------------------------|------------------------|-----------------------------------------------------------------------------------------------------------------------------------|------------------------|------------------------|--------------------------------------------------------------------------------------------|------------------------|------------------------|
|                | 1990                                                                                                                                                                  | 2000                   | 2015                   | 1990                                                                                   | 2000                   | 2015                   | 1990                                                                                                                              | 2000                   | 2015                   | 1990                                                                                       | 2000                   | 2015                   |
| Czech Republic | 37.42<br>(32.86-43.01)                                                                                                                                                | 49.63<br>(45.14-54.08) | 65.37<br>(60.41-68.88) | 36.29<br>(32.19-44.93)                                                                 | 44.10<br>(40.17-51.75) | 50.44<br>(45.86-56.67) | 43.34<br>(40.25-45.88)                                                                                                            | 42.94<br>(39.85-45.69) | 46.11<br>(43.06-48.88) | 58.53<br>(54.51-62.67)                                                                     | 60.56<br>(56.73-64.39) | 78.63<br>(75.24-81.99) |
| Hungary        | 33.20<br>(28.53-39.08)                                                                                                                                                | 37.50<br>(32.99-43.05) | 52.09<br>(47.68-56.59) | 16.71<br>(12.20-28.93)                                                                 | 27.47<br>(23.05-37.74) | 40.05<br>(35.17-47.85) | 42.41<br>(39.37-45.33)                                                                                                            | 48.39<br>(45.54-50.96) | 52.06<br>(49.10-55.05) | 47.70<br>(43.23-52.66)                                                                     | 59.56<br>(55.49-63.54) | 79.53<br>(75.87-83.15) |
| Macedonia      | 44.32<br>(39.83-49.38)                                                                                                                                                | 42.31<br>(37.84-47.44) | 55.13<br>(50.14-59.44) | 57.75<br>(53.92-63.09)                                                                 | 58.91<br>(55.08-63.73) | 63.80<br>(58.90-68.99) | 57.78<br>(53.77-62.50)                                                                                                            | 60.58<br>(56.43-65.14) | 58.80<br>(54.62-63.35) | 69.73<br>(65.83-73.60)                                                                     | 75.15<br>(71.77-78.47) | 75.87<br>(71.61-80.07) |
| Montenegro     | 47.45<br>(42.58-52.44)                                                                                                                                                | 44.73<br>(40.24-49.56) | 54.97<br>(50.16-59.74) | 54.17<br>(49.06-60.04)                                                                 | 51.89<br>(47.32-58.04) | 53.00<br>(47.88-59.35) | 65.28<br>(61.44-69.84)                                                                                                            | 67.93<br>(64.39-71.72) | 64.06<br>(60.61-67.87) | 64.21<br>(59.51-69.40)                                                                     | 64.35<br>(60.35-68.33) | 71.19<br>(66.93-76.04) |
| Poland         | 36.33<br>(31.79-41.90)                                                                                                                                                | 45.05<br>(40.48-49.95) | 57.93<br>(53.55-62.22) | 44.53<br>(40.41-51.67)                                                                 | 39.03<br>(35.11-47.11) | 39.47<br>(34.95-47.44) | 59.29<br>(57.27-61.37)                                                                                                            | 59.45<br>(57.07-61.76) | 54.49<br>(51.26-57.56) | 44.80<br>(40.25-49.95)                                                                     | 51.55<br>(47.39-56.07) | 67.95<br>(64.08-71.61) |
| Romania        | 41.33<br>(36.92-46.52)                                                                                                                                                | 41.28<br>(36.83-46.47) | 51.43<br>(46.89-56.18) | 55.99<br>(52.29-61.39)                                                                 | 52.20<br>(48.29-58.33) | 52.83<br>(48.61-59.12) | 44.72<br>(41.71-47.36)                                                                                                            | 50.03<br>(47.33-52.50) | 48.82<br>(45.12-52.19) | 49.51<br>(45.26-54.35)                                                                     | 58.26<br>(54.25-62.65) | 68.35<br>(64.36-72.35) |
| Serbia         | 45.12<br>(40.39-50.12)                                                                                                                                                | 39.01<br>(34.38-44.35) | 53.80<br>(49.42-58.17) | 37.02<br>(32.40-45.21)                                                                 | 35.65<br>(31.54-43.98) | 43.91<br>(39.20-51.08) | 64.36<br>(60.53-68.59)                                                                                                            | 65.02<br>(61.78-68.62) | 59.48<br>(55.79-63.41) | 58.20<br>(53.10-63.55)                                                                     | 63.17<br>(59.32-67.14) | 69.26<br>(65.47-72.82) |
| Slovakia       | 36.75<br>(32.20-42.31)                                                                                                                                                | 43.87<br>(39.47-48.84) | 60.45<br>(56.25-64.36) | 40.71<br>(35.94-48.64)                                                                 | 46.05<br>(42.17-52.74) | 55.17<br>(50.40-60.72) | 44.15<br>(41.12-46.74)                                                                                                            | 47.40<br>(44.78-49.87) | 50.71<br>(47.78-53.50) | 47.63<br>(41.98-53.56)                                                                     | 57.43<br>(53.59-61.43) | 77.41<br>(73.59-81.12) |
| Slovenia       | 51.06<br>(46.74-55.61)                                                                                                                                                | 57.68<br>(53.26-61.87) | 79.06<br>(73.63-82.28) | 22.37<br>(18.02-33.46)                                                                 | 25.85<br>(21.48-36.47) | 44.19<br>(38.89-51.21) | 41.68<br>(38.34-44.66)                                                                                                            | 48.67<br>(45.67-51.52) | 49.92<br>(45.83-54.45) | 43.77<br>(39.10-49.14)                                                                     | 56.85<br>(52.77-61.09) | 80.15<br>(76.31-84.44) |
| Armenia        | 42.43<br>(37.82-47.60)                                                                                                                                                | 39.88<br>(35.34-45.10) | 49.81<br>(44.85-54.76) | 80.98<br>(72.38-84.69)                                                                 | 76.96<br>(72.61-80.26) | 64.80<br>(59.36-73.71) | 80.36<br>(77.98-83.07)                                                                                                            | 81.73<br>(80.16-83.34) | 79.07<br>(76.19-82.51) | 51.59<br>(47.15-56.43)                                                                     | 61.62<br>(57.24-66.19) | 69.15<br>(64.35-73.63) |
| Azerbaijan     | 35.57<br>(30.78-41.39)                                                                                                                                                | 34.46<br>(29.59-40.32) | 48.11<br>(42.62-53.36) | 83.81<br>(79.51-87.20)                                                                 | 88.26<br>(80.73-91.88) | 80.36<br>(74.65-86.27) | 75.20<br>(72.50-78.49)                                                                                                            | 77.39<br>(74.97-79.96) | 68.99<br>(64.93-73.92) | 50.54<br>(45.64-57.26)                                                                     | 69.95<br>(65.13-73.94) | 75.56<br>(70.00-81.20) |

**Appendix Table 1a. Scaled values for each SDG health-related indicator and three summary indicators by country for 1990, 2000, and 2015**

| Location     | Indicator 3.4.1: Death rate due to cardiovascular disease, cancer, diabetes, and chronic respiratory disease among populations aged 30 to 70 (per 100,000 population) |                        |                        | Indicator 3.4.2: Age-standardised death rate due to self-harm (per 100,000 population) |                        |                        | Indicator 3.5.2: Risk-weighted prevalence of alcohol consumption, as measured by the summary exposure value (SEV) for alcohol use |                        |                        | Indicator 3.6.1: Age-standardised death rate due to road injuries (per 100,000 population) |                        |                        |
|--------------|-----------------------------------------------------------------------------------------------------------------------------------------------------------------------|------------------------|------------------------|----------------------------------------------------------------------------------------|------------------------|------------------------|-----------------------------------------------------------------------------------------------------------------------------------|------------------------|------------------------|--------------------------------------------------------------------------------------------|------------------------|------------------------|
|              | 1990                                                                                                                                                                  | 2000                   | 2015                   | 1990                                                                                   | 2000                   | 2015                   | 1990                                                                                                                              | 2000                   | 2015                   | 1990                                                                                       | 2000                   | 2015                   |
| Georgia      | 39.53<br>(34.45-45.08)                                                                                                                                                | 42.75<br>(37.75-48.14) | 43.36<br>(38.29-48.76) | 72.30<br>(66.00-76.55)                                                                 | 68.95<br>(64.93-73.01) | 62.73<br>(57.81-68.40) | 73.76<br>(71.28-76.71)                                                                                                            | 78.33<br>(76.77-80.05) | 71.72<br>(68.54-75.42) | 47.73<br>(42.72-53.22)                                                                     | 67.60<br>(62.54-71.74) | 53.69<br>(47.91-59.03) |
| Kazakhstan   | 33.73<br>(29.18-39.45)                                                                                                                                                | 24.81<br>(19.59-31.53) | 37.81<br>(32.51-43.51) | 30.22<br>(25.85-39.84)                                                                 | 17.34<br>(12.83-29.79) | 22.20<br>(16.51-33.68) | 52.89<br>(49.54-56.51)                                                                                                            | 62.08<br>(59.39-64.97) | 57.53<br>(53.48-62.38) | 43.45<br>(38.56-48.92)                                                                     | 52.91<br>(48.64-57.59) | 50.82<br>(45.34-56.68) |
| Kyrgyzstan   | 35.51<br>(30.79-41.33)                                                                                                                                                | 30.81<br>(25.80-36.89) | 40.43<br>(35.73-45.79) | 38.94<br>(34.35-47.06)                                                                 | 37.06<br>(31.65-45.17) | 45.62<br>(38.81-52.61) | 72.01<br>(69.77-74.15)                                                                                                            | 75.37<br>(73.59-77.12) | 75.27<br>(72.51-78.33) | 41.02<br>(35.66-46.85)                                                                     | 53.41<br>(48.54-58.16) | 50.32<br>(45.32-55.75) |
| Mongolia     | 30.00<br>(24.96-36.29)                                                                                                                                                | 21.63<br>(15.98-28.97) | 29.64<br>(24.02-36.02) | 26.38<br>(18.49-37.59)                                                                 | 17.09<br>(10.79-29.47) | 18.76<br>(12.45-31.14) | 81.26<br>(79.25-83.29)                                                                                                            | 80.74<br>(78.77-82.72) | 71.65<br>(68.37-75.31) | 55.76<br>(43.83-63.98)                                                                     | 54.14<br>(47.83-59.43) | 46.83<br>(40.82-52.89) |
| Tajikistan   | 40.26<br>(35.45-45.59)                                                                                                                                                | 38.38<br>(33.60-43.98) | 51.63<br>(46.67-56.25) | 65.53<br>(61.09-70.05)                                                                 | 71.48<br>(64.64-75.59) | 75.41<br>(67.92-80.95) | 77.62<br>(75.00-80.50)                                                                                                            | 82.55<br>(80.77-84.20) | 85.60<br>(83.37-87.96) | 54.69<br>(49.99-61.79)                                                                     | 73.80<br>(67.61-77.80) | 78.40<br>(73.97-82.61) |
| Turkmenistan | 31.29<br>(26.51-37.32)                                                                                                                                                | 27.82<br>(22.78-34.27) | 41.43<br>(36.68-46.41) | 54.88<br>(50.82-60.72)                                                                 | 51.83<br>(46.36-58.41) | 59.63<br>(50.55-65.84) | 84.86<br>(82.71-87.07)                                                                                                            | 81.08<br>(79.39-82.64) | 79.82<br>(77.31-82.57) | 48.46<br>(43.93-53.68)                                                                     | 56.88<br>(49.28-62.22) | 71.42<br>(61.31-76.17) |
| Uzbekistan   | 36.07<br>(31.04-41.58)                                                                                                                                                | 33.86<br>(28.75-39.70) | 44.46<br>(39.76-49.49) | 52.55<br>(48.37-58.48)                                                                 | 50.77<br>(45.94-57.24) | 54.52<br>(48.56-61.34) | 85.62<br>(83.63-87.58)                                                                                                            | 83.38<br>(81.93-84.67) | 78.43<br>(75.93-81.20) | 49.26<br>(44.73-54.51)                                                                     | 58.01<br>(53.28-62.50) | 61.38<br>(55.73-66.84) |
| Colombia     | 55.70<br>(51.49-59.89)                                                                                                                                                | 62.16<br>(57.57-66.02) | 81.25<br>(74.76-84.61) | 73.41<br>(69.76-76.98)                                                                 | 63.73<br>(59.81-68.18) | 69.17<br>(64.67-73.55) | 68.35<br>(65.85-70.79)                                                                                                            | 70.80<br>(68.65-73.01) | 70.83<br>(67.59-74.50) | 42.13<br>(37.50-47.73)                                                                     | 44.06<br>(39.35-49.27) | 57.97<br>(53.32-62.55) |
| Costa Rica   | 70.02<br>(65.20-73.49)                                                                                                                                                | 76.38<br>(71.03-79.72) | 87.18<br>(80.39-91.02) | 69.21<br>(65.14-73.21)                                                                 | 64.37<br>(60.45-68.87) | 63.65<br>(59.43-68.67) | 70.47<br>(68.64-72.20)                                                                                                            | 71.52<br>(69.82-73.39) | 72.74<br>(69.95-75.92) | 48.52<br>(44.18-53.27)                                                                     | 48.19<br>(43.84-53.16) | 58.57<br>(54.09-62.91) |
| El Salvador  | 64.15<br>(59.23-68.21)                                                                                                                                                | 71.64<br>(66.15-75.66) | 75.49<br>(69.23-80.40) | 47.47<br>(42.65-54.68)                                                                 | 53.79<br>(49.14-59.73) | 56.50<br>(49.95-62.63) | 83.81<br>(82.54-85.14)                                                                                                            | 81.70<br>(80.48-83.00) | 80.55<br>(78.57-82.87) | 26.22<br>(19.96-33.90)                                                                     | 28.85<br>(22.66-36.26) | 41.64<br>(34.22-47.91) |
| Guatemala    | 71.94<br>(66.39-75.61)                                                                                                                                                | 68.57<br>(63.58-72.20) | 69.75<br>(62.09-76.57) | 56.03<br>(51.86-61.48)                                                                 | 45.98<br>(41.94-53.17) | 62.63<br>(56.44-68.62) | 87.17<br>(86.27-88.00)                                                                                                            | 88.32<br>(87.48-89.09) | 88.35<br>(87.56-89.11) | 54.12<br>(49.95-58.70)                                                                     | 56.40<br>(52.59-60.68) | 54.51<br>(48.84-60.11) |

**Appendix Table 1a. Scaled values for each SDG health-related indicator and three summary indicators by country for 1990, 2000, and 2015**

| Location            | Indicator 3.4.1: Death rate due to cardiovascular disease, cancer, diabetes, and chronic respiratory disease among populations aged 30 to 70 (per 100,000 population) |                        |                        | Indicator 3.4.2: Age-standardised death rate due to self-harm (per 100,000 population) |                         |                         | Indicator 3.5.2: Risk-weighted prevalence of alcohol consumption, as measured by the summary exposure value (SEV) for alcohol use |                        |                        | Indicator 3.6.1: Age-standardised death rate due to road injuries (per 100,000 population) |                        |                        |
|---------------------|-----------------------------------------------------------------------------------------------------------------------------------------------------------------------|------------------------|------------------------|----------------------------------------------------------------------------------------|-------------------------|-------------------------|-----------------------------------------------------------------------------------------------------------------------------------|------------------------|------------------------|--------------------------------------------------------------------------------------------|------------------------|------------------------|
|                     | 1990                                                                                                                                                                  | 2000                   | 2015                   | 1990                                                                                   | 2000                    | 2015                    | 1990                                                                                                                              | 2000                   | 2015                   | 1990                                                                                       | 2000                   | 2015                   |
| Honduras            | 58.86<br>(53.74-63.32)                                                                                                                                                | 52.69<br>(44.45-61.27) | 58.80<br>(48.91-68.64) | 71.26<br>(62.61-76.15)                                                                 | 69.33<br>(60.99-76.47)  | 67.86<br>(58.41-76.44)  | 83.47<br>(81.96-84.83)                                                                                                            | 81.19<br>(79.84-82.47) | 80.79<br>(79.04-82.88) | 48.19<br>(43.26-54.32)                                                                     | 50.22<br>(41.79-57.67) | 55.16<br>(47.11-63.10) |
| Mexico              | 63.58<br>(59.08-67.28)                                                                                                                                                | 66.34<br>(61.69-69.91) | 71.60<br>(66.48-75.06) | 79.43<br>(75.51-82.34)                                                                 | 74.77<br>(70.85-78.10)  | 69.27<br>(65.23-73.24)  | 71.39<br>(69.87-72.98)                                                                                                            | 70.72<br>(69.30-72.12) | 73.92<br>(71.88-76.34) | 38.44<br>(33.45-44.31)                                                                     | 47.63<br>(43.18-52.45) | 53.42<br>(49.55-57.82) |
| Nicaragua           | 78.13<br>(72.17-82.39)                                                                                                                                                | 76.90<br>(70.89-80.95) | 78.92<br>(71.67-83.85) | 67.57<br>(62.25-72.16)                                                                 | 59.29<br>(54.80-65.44)  | 63.40<br>(58.45-68.59)  | 80.88<br>(79.61-82.00)                                                                                                            | 80.74<br>(79.53-81.90) | 81.18<br>(79.68-82.76) | 46.63<br>(41.84-52.15)                                                                     | 55.57<br>(51.33-60.03) | 60.54<br>(54.73-66.16) |
| Panama              | 66.68<br>(61.64-70.85)                                                                                                                                                | 74.87<br>(69.59-79.09) | 81.65<br>(73.06-88.62) | 69.46<br>(64.84-73.69)                                                                 | 64.86<br>(60.50-69.49)  | 69.66<br>(61.58-75.64)  | 75.22<br>(73.92-76.59)                                                                                                            | 74.22<br>(72.93-75.55) | 71.92<br>(69.93-74.05) | 41.47<br>(36.07-48.23)                                                                     | 46.02<br>(41.19-51.79) | 54.57<br>(48.09-60.83) |
| Venezuela           | 54.07<br>(49.58-58.30)                                                                                                                                                | 60.38<br>(55.90-64.24) | 64.75<br>(57.55-70.92) | 64.66<br>(60.46-69.14)                                                                 | 56.93<br>(52.91-62.46)  | 57.32<br>(51.62-63.86)  | 73.14<br>(70.22-76.90)                                                                                                            | 74.11<br>(71.25-77.79) | 74.48<br>(71.49-78.19) | 35.66<br>(30.40-41.84)                                                                     | 41.62<br>(36.65-47.29) | 44.78<br>(38.58-51.18) |
| Bolivia             | 50.66<br>(44.48-56.42)                                                                                                                                                | 59.28<br>(53.69-64.54) | 66.83<br>(57.32-75.76) | 40.04<br>(32.74-49.61)                                                                 | 43.70<br>(38.47-51.34)  | 48.52<br>(40.95-56.78)  | 79.01<br>(76.66-82.12)                                                                                                            | 77.68<br>(75.34-80.67) | 76.61<br>(74.35-79.54) | 33.08<br>(24.39-42.26)                                                                     | 41.97<br>(35.35-48.00) | 52.08<br>(44.74-59.28) |
| Ecuador             | 64.22<br>(59.62-68.03)                                                                                                                                                | 66.04<br>(61.04-70.36) | 72.01<br>(65.50-77.87) | 70.02<br>(63.06-73.94)                                                                 | 63.24<br>(59.38-67.72)  | 62.18<br>(56.92-68.32)  | 84.64<br>(83.72-85.49)                                                                                                            | 82.33<br>(81.28-83.31) | 81.80<br>(80.70-82.85) | 34.47<br>(29.22-40.74)                                                                     | 37.91<br>(32.60-43.98) | 39.63<br>(33.67-45.53) |
| Peru                | 67.28<br>(62.12-71.31)                                                                                                                                                | 75.39<br>(68.70-80.01) | 91.47<br>(82.26-98.45) | 80.96<br>(75.81-84.69)                                                                 | 75.26<br>(71.02-80.65)  | 85.50<br>(79.80-90.44)  | 65.82<br>(63.70-67.69)                                                                                                            | 67.79<br>(66.00-69.45) | 68.37<br>(65.79-71.39) | 51.99<br>(46.14-57.13)                                                                     | 51.97<br>(47.19-56.96) | 59.40<br>(53.89-65.43) |
| Antigua and Barbuda | 51.86<br>(46.79-56.49)                                                                                                                                                | 54.63<br>(49.39-59.47) | 63.32<br>(57.16-69.51) | 97.63<br>(93.05-100.00)                                                                | 96.74<br>(92.52-100.00) | 96.95<br>(91.85-100.00) | 70.57<br>(66.90-75.33)                                                                                                            | 72.99<br>(68.27-78.97) | 68.10<br>(64.51-73.11) | 73.02<br>(68.95-76.80)                                                                     | 75.16<br>(71.04-78.98) | 78.86<br>(74.07-83.14) |
| The Bahamas         | 40.31<br>(35.24-45.61)                                                                                                                                                | 45.71<br>(40.06-50.95) | 55.14<br>(48.80-61.00) | 83.87<br>(79.51-87.98)                                                                 | 82.26<br>(77.50-86.70)  | 85.67<br>(80.18-90.35)  | 59.71<br>(56.98-62.05)                                                                                                            | 71.72<br>(69.45-73.87) | 64.42<br>(62.11-66.88) | 42.72<br>(36.93-48.66)                                                                     | 46.30<br>(40.76-52.22) | 56.97<br>(51.54-62.40) |
| Barbados            | 50.43<br>(45.70-54.92)                                                                                                                                                | 55.34<br>(50.34-59.85) | 60.08<br>(54.08-65.51) | 79.43<br>(75.44-83.06)                                                                 | 81.21<br>(77.12-84.82)  | 77.08<br>(72.21-81.71)  | 70.77<br>(68.56-73.01)                                                                                                            | 75.62<br>(74.18-77.12) | 67.63<br>(65.18-70.41) | 61.90<br>(57.92-65.88)                                                                     | 64.73<br>(60.39-69.07) | 67.41<br>(62.33-72.10) |

**Appendix Table 1a. Scaled values for each SDG health-related indicator and three summary indicators by country for 1990, 2000, and 2015**

| Location                         | Indicator 3.4.1: Death rate due to cardiovascular disease, cancer, diabetes, and chronic respiratory disease among populations aged 30 to 70 (per 100,000 population) |                        |                        | Indicator 3.4.2: Age-standardised death rate due to self-harm (per 100,000 population) |                        |                        | Indicator 3.5.2: Risk-weighted prevalence of alcohol consumption, as measured by the summary exposure value (SEV) for alcohol use |                        |                        | Indicator 3.6.1: Age-standardised death rate due to road injuries (per 100,000 population) |                        |                        |
|----------------------------------|-----------------------------------------------------------------------------------------------------------------------------------------------------------------------|------------------------|------------------------|----------------------------------------------------------------------------------------|------------------------|------------------------|-----------------------------------------------------------------------------------------------------------------------------------|------------------------|------------------------|--------------------------------------------------------------------------------------------|------------------------|------------------------|
|                                  | 1990                                                                                                                                                                  | 2000                   | 2015                   | 1990                                                                                   | 2000                   | 2015                   | 1990                                                                                                                              | 2000                   | 2015                   | 1990                                                                                       | 2000                   | 2015                   |
| Belize                           | 52.30<br>(47.22-57.21)                                                                                                                                                | 42.52<br>(37.60-47.91) | 51.42<br>(45.64-57.32) | 73.32<br>(68.57-77.42)                                                                 | 60.83<br>(56.36-66.19) | 64.39<br>(58.20-70.50) | 73.51<br>(71.27-75.78)                                                                                                            | 76.14<br>(74.12-78.10) | 70.82<br>(68.33-73.60) | 51.12<br>(46.69-56.22)                                                                     | 41.78<br>(36.45-47.73) | 48.93<br>(42.74-54.83) |
| Cuba                             | 52.99<br>(48.46-57.36)                                                                                                                                                | 57.35<br>(53.05-61.30) | 64.19<br>(59.47-68.06) | 33.42<br>(29.33-42.57)                                                                 | 40.62<br>(36.60-48.57) | 47.26<br>(43.11-54.34) | 76.05<br>(74.32-77.84)                                                                                                            | 77.93<br>(76.40-79.44) | 73.11<br>(70.39-76.30) | 45.49<br>(40.94-50.65)                                                                     | 57.04<br>(53.15-61.10) | 72.94<br>(69.41-76.52) |
| Dominica                         | 50.54<br>(45.26-55.59)                                                                                                                                                | 54.98<br>(49.80-59.38) | 53.72<br>(47.21-60.08) | 84.11<br>(79.35-88.14)                                                                 | 79.68<br>(75.19-83.75) | 75.15<br>(69.18-81.14) | 64.05<br>(61.30-66.58)                                                                                                            | 69.88<br>(67.84-71.80) | 67.89<br>(64.98-71.55) | 62.96<br>(58.56-67.09)                                                                     | 61.89<br>(57.53-66.11) | 57.52<br>(51.47-63.74) |
| Dominican Republic               | 64.40<br>(59.90-68.39)                                                                                                                                                | 66.27<br>(60.01-70.81) | 65.73<br>(60.06-69.71) | 75.32<br>(67.60-79.32)                                                                 | 65.87<br>(61.40-71.97) | 66.83<br>(62.54-72.01) | 76.32<br>(74.54-78.05)                                                                                                            | 72.44<br>(70.50-74.37) | 71.41<br>(68.91-74.25) | 44.44<br>(39.46-50.15)                                                                     | 41.57<br>(36.32-47.89) | 44.49<br>(39.21-50.28) |
| Grenada                          | 40.69<br>(36.12-46.15)                                                                                                                                                | 42.09<br>(37.01-47.48) | 44.47<br>(38.90-50.19) | 71.73<br>(66.91-75.84)                                                                 | 64.22<br>(59.82-68.80) | 66.80<br>(61.46-72.11) | 60.99<br>(58.50-63.34)                                                                                                            | 63.61<br>(61.13-66.13) | 64.37<br>(61.47-67.56) | 63.00<br>(58.54-67.43)                                                                     | 60.16<br>(55.76-64.44) | 59.44<br>(53.67-65.26) |
| Guyana                           | 29.08<br>(23.94-35.58)                                                                                                                                                | 29.78<br>(24.48-35.98) | 37.05<br>(30.40-44.03) | 31.50<br>(25.75-40.97)                                                                 | 22.09<br>(16.78-32.75) | 23.75<br>(15.70-35.87) | 66.57<br>(63.57-69.70)                                                                                                            | 68.97<br>(66.18-71.81) | 68.03<br>(65.11-71.60) | 47.13<br>(42.25-52.38)                                                                     | 45.51<br>(40.45-50.89) | 46.40<br>(39.42-53.53) |
| Haiti                            | 24.83<br>(17.94-31.80)                                                                                                                                                | 34.56<br>(26.38-43.04) | 36.90<br>(26.94-47.75) | 57.16<br>(43.69-68.21)                                                                 | 60.98<br>(47.65-70.47) | 60.33<br>(46.67-71.05) | 71.94<br>(69.55-74.17)                                                                                                            | 72.78<br>(70.47-75.00) | 71.86<br>(68.67-75.33) | 32.45<br>(20.91-43.07)                                                                     | 40.27<br>(29.92-51.18) | 41.85<br>(30.08-54.29) |
| Jamaica                          | 54.09<br>(49.49-58.56)                                                                                                                                                | 54.56<br>(49.67-59.12) | 57.57<br>(50.87-63.55) | 98.97<br>(94.16-100.00)                                                                | 90.09<br>(85.49-93.62) | 85.56<br>(80.13-90.83) | 76.10<br>(73.98-78.02)                                                                                                            | 79.45<br>(77.73-81.07) | 75.68<br>(73.10-78.85) | 80.62<br>(77.03-84.02)                                                                     | 78.98<br>(74.31-82.99) | 71.31<br>(65.52-77.26) |
| Saint Lucia                      | 42.83<br>(37.85-48.14)                                                                                                                                                | 47.82<br>(43.06-52.55) | 57.50<br>(51.83-62.61) | 69.73<br>(65.37-73.90)                                                                 | 67.41<br>(63.00-71.88) | 67.30<br>(62.14-72.10) | 61.51<br>(58.74-63.95)                                                                                                            | 62.58<br>(60.11-64.89) | 61.14<br>(58.41-64.26) | 54.93<br>(50.63-59.99)                                                                     | 56.67<br>(52.30-61.64) | 63.28<br>(58.29-67.99) |
| Saint Vincent and the Grenadines | 43.81<br>(38.67-49.32)                                                                                                                                                | 41.53<br>(36.41-46.83) | 45.69<br>(40.36-51.09) | 70.82<br>(66.35-75.18)                                                                 | 64.92<br>(60.42-69.93) | 61.05<br>(55.93-67.20) | 74.87<br>(70.66-80.35)                                                                                                            | 74.80<br>(70.72-79.98) | 71.70<br>(67.81-76.86) | 68.66<br>(64.25-72.87)                                                                     | 67.73<br>(63.78-71.68) | 67.07<br>(62.74-71.69) |
| Suriname                         | 48.50<br>(43.78-53.27)                                                                                                                                                | 50.30<br>(44.76-55.47) | 55.33<br>(48.57-61.88) | 37.53<br>(32.24-46.18)                                                                 | 31.86<br>(27.05-41.33) | 29.08<br>(22.22-39.05) | 77.12<br>(74.85-79.41)                                                                                                            | 76.09<br>(74.15-77.97) | 73.26<br>(70.80-76.09) | 45.47<br>(40.13-51.26)                                                                     | 47.29<br>(42.19-52.50) | 48.70<br>(42.57-54.68) |

**Appendix Table 1a. Scaled values for each SDG health-related indicator and three summary indicators by country for 1990, 2000, and 2015**

| Location            | Indicator 3.4.1: Death rate due to cardiovascular disease, cancer, diabetes, and chronic respiratory disease among populations aged 30 to 70 (per 100,000 population) |                        |                        | Indicator 3.4.2: Age-standardised death rate due to self-harm (per 100,000 population) |                        |                        | Indicator 3.5.2: Risk-weighted prevalence of alcohol consumption, as measured by the summary exposure value (SEV) for alcohol use |                        |                        | Indicator 3.6.1: Age-standardised death rate due to road injuries (per 100,000 population) |                        |                        |
|---------------------|-----------------------------------------------------------------------------------------------------------------------------------------------------------------------|------------------------|------------------------|----------------------------------------------------------------------------------------|------------------------|------------------------|-----------------------------------------------------------------------------------------------------------------------------------|------------------------|------------------------|--------------------------------------------------------------------------------------------|------------------------|------------------------|
|                     | 1990                                                                                                                                                                  | 2000                   | 2015                   | 1990                                                                                   | 2000                   | 2015                   | 1990                                                                                                                              | 2000                   | 2015                   | 1990                                                                                       | 2000                   | 2015                   |
| Trinidad and Tobago | 34.65<br>(29.99-40.48)                                                                                                                                                | 38.39<br>(33.67-43.89) | 47.38<br>(41.70-52.68) | 45.41<br>(41.30-52.25)                                                                 | 46.03<br>(41.95-53.10) | 46.31<br>(40.44-54.14) | 67.97<br>(64.11-73.22)                                                                                                            | 69.06<br>(65.52-73.91) | 64.58<br>(60.95-69.45) | 52.93<br>(48.58-57.53)                                                                     | 53.24<br>(48.97-57.84) | 54.63<br>(49.13-60.19) |
| Brazil              | 44.33<br>(39.85-49.43)                                                                                                                                                | 49.86<br>(45.40-54.36) | 60.58<br>(55.93-64.70) | 61.86<br>(58.23-66.48)                                                                 | 65.10<br>(59.86-69.43) | 67.63<br>(61.90-71.93) | 75.46<br>(74.05-76.72)                                                                                                            | 70.47<br>(68.99-71.75) | 70.63<br>(69.23-71.87) | 30.59<br>(25.10-37.26)                                                                     | 37.56<br>(31.99-43.61) | 42.78<br>(37.25-48.24) |
| Paraguay            | 60.72<br>(55.64-65.37)                                                                                                                                                | 59.68<br>(54.72-64.24) | 58.40<br>(51.14-64.75) | 79.98<br>(75.08-83.98)                                                                 | 72.65<br>(68.13-76.91) | 68.10<br>(61.07-74.79) | 65.33<br>(63.19-67.25)                                                                                                            | 66.71<br>(64.70-68.46) | 67.39<br>(65.12-69.64) | 52.38<br>(47.64-57.51)                                                                     | 48.37<br>(43.43-53.71) | 40.94<br>(33.02-48.51) |
| China               | 35.22<br>(30.28-41.19)                                                                                                                                                | 41.36<br>(36.72-46.73) | 58.06<br>(53.31-62.54) | 31.57<br>(25.54-44.95)                                                                 | 40.31<br>(35.94-48.66) | 58.66<br>(53.59-64.04) | 78.42<br>(77.16-79.75)                                                                                                            | 76.89<br>(75.57-78.29) | 73.51<br>(71.19-76.30) | 44.82<br>(39.73-49.91)                                                                     | 41.61<br>(36.32-47.31) | 48.57<br>(43.49-54.04) |
| North Korea         | 43.20<br>(31.38-54.94)                                                                                                                                                | 40.00<br>(29.47-51.92) | 42.36<br>(32.65-51.98) | 36.31<br>(24.86-48.10)                                                                 | 39.00<br>(28.41-50.14) | 44.77<br>(34.83-54.36) | 78.53<br>(75.43-82.63)                                                                                                            | 81.09<br>(78.04-84.93) | 83.00<br>(79.78-86.75) | 41.93<br>(30.78-52.46)                                                                     | 37.04<br>(25.15-50.22) | 39.04<br>(26.31-52.86) |
| Taiwan              | 52.77<br>(48.34-57.07)                                                                                                                                                | 57.66<br>(53.12-61.87) | 72.25<br>(64.44-79.87) | 41.01<br>(34.68-49.02)                                                                 | 45.84<br>(39.74-52.97) | 47.19<br>(40.87-54.44) | 73.13<br>(69.96-77.74)                                                                                                            | 70.96<br>(67.66-75.35) | 71.42<br>(67.96-76.11) | 37.52<br>(30.42-45.05)                                                                     | 46.35<br>(40.03-52.53) | 58.32<br>(52.25-64.04) |
| Cambodia            | 31.83<br>(25.59-39.11)                                                                                                                                                | 33.38<br>(28.00-39.71) | 46.06<br>(38.41-53.39) | 36.58<br>(24.10-49.06)                                                                 | 37.43<br>(26.10-49.29) | 45.44<br>(37.70-54.55) | 93.27<br>(92.26-94.27)                                                                                                            | 82.36<br>(80.75-84.37) | 78.58<br>(76.00-82.14) | 37.28<br>(24.05-52.72)                                                                     | 35.74<br>(24.38-46.73) | 47.24<br>(39.36-54.74) |
| Indonesia           | 45.70<br>(40.22-51.56)                                                                                                                                                | 44.27<br>(39.00-49.72) | 47.23<br>(39.18-56.71) | 89.55<br>(83.43-95.00)                                                                 | 88.27<br>(83.24-92.72) | 87.72<br>(80.05-94.89) | 95.65<br>(95.16-96.12)                                                                                                            | 95.42<br>(94.91-95.86) | 95.03<br>(94.53-95.52) | 38.30<br>(31.92-45.84)                                                                     | 41.17<br>(35.71-47.44) | 49.97<br>(41.59-57.92) |
| Laos                | 26.14<br>(16.69-36.52)                                                                                                                                                | 29.20<br>(22.15-36.59) | 43.76<br>(35.21-52.66) | 30.89<br>(16.11-47.41)                                                                 | 31.64<br>(20.02-45.23) | 41.89<br>(32.85-52.36) | 91.81<br>(89.49-93.96)                                                                                                            | 90.64<br>(87.85-93.19) | 88.26<br>(84.57-91.88) | 30.37<br>(16.87-44.51)                                                                     | 27.61<br>(15.91-40.22) | 39.73<br>(30.85-48.36) |
| Malaysia            | 47.75<br>(43.39-52.40)                                                                                                                                                | 53.09<br>(48.62-57.43) | 59.45<br>(52.43-66.48) | 56.92<br>(51.77-65.43)                                                                 | 56.39<br>(51.74-65.06) | 59.10<br>(52.06-67.20) | 92.49<br>(91.90-93.09)                                                                                                            | 95.02<br>(94.63-95.39) | 94.23<br>(93.67-94.84) | 37.82<br>(32.36-44.38)                                                                     | 39.31<br>(34.09-46.14) | 44.27<br>(37.10-51.98) |
| Maldives            | 49.69<br>(43.82-54.71)                                                                                                                                                | 68.26<br>(62.85-72.47) | 91.25<br>(81.06-99.55) | 21.06<br>(9.65-34.86)                                                                  | 29.52<br>(24.34-39.19) | 49.04<br>(41.87-56.53) | 91.98<br>(90.63-93.53)                                                                                                            | 90.38<br>(88.56-92.40) | 88.34<br>(86.00-91.16) | 50.31<br>(43.35-60.32)                                                                     | 59.34<br>(55.15-63.67) | 75.98<br>(70.62-81.16) |

**Appendix Table 1a. Scaled values for each SDG health-related indicator and three summary indicators by country for 1990, 2000, and 2015**

| Location                       | Indicator 3.4.1: Death rate due to cardiovascular disease, cancer, diabetes, and chronic respiratory disease among populations aged 30 to 70 (per 100,000 population) |                        |                        | Indicator 3.4.2: Age-standardised death rate due to self-harm (per 100,000 population) |                        |                        | Indicator 3.5.2: Risk-weighted prevalence of alcohol consumption, as measured by the summary exposure value (SEV) for alcohol use |                        |                        | Indicator 3.6.1: Age-standardised death rate due to road injuries (per 100,000 population) |                        |                        |
|--------------------------------|-----------------------------------------------------------------------------------------------------------------------------------------------------------------------|------------------------|------------------------|----------------------------------------------------------------------------------------|------------------------|------------------------|-----------------------------------------------------------------------------------------------------------------------------------|------------------------|------------------------|--------------------------------------------------------------------------------------------|------------------------|------------------------|
|                                | 1990                                                                                                                                                                  | 2000                   | 2015                   | 1990                                                                                   | 2000                   | 2015                   | 1990                                                                                                                              | 2000                   | 2015                   | 1990                                                                                       | 2000                   | 2015                   |
| Mauritius                      | 33.37<br>(28.73-39.25)                                                                                                                                                | 39.18<br>(34.55-44.65) | 52.81<br>(47.87-57.37) | 47.52<br>(43.32-54.37)                                                                 | 50.82<br>(46.33-57.06) | 59.00<br>(54.98-64.34) | 79.31<br>(77.81-80.92)                                                                                                            | 79.11<br>(77.57-80.72) | 80.40<br>(77.40-84.10) | 56.96<br>(52.93-61.43)                                                                     | 55.63<br>(51.20-60.18) | 65.79<br>(61.67-69.84) |
| Myanmar                        | 33.29<br>(16.03-53.10)                                                                                                                                                | 35.27<br>(18.17-55.18) | 43.61<br>(25.80-62.52) | 79.84<br>(66.88-92.78)                                                                 | 78.87<br>(65.63-94.95) | 76.27<br>(63.65-89.82) | 98.07<br>(97.75-98.35)                                                                                                            | 97.47<br>(97.12-97.77) | 96.69<br>(96.00-97.40) | 54.83<br>(42.46-67.82)                                                                     | 57.27<br>(44.64-72.45) | 58.74<br>(45.36-73.66) |
| Philippines                    | 52.81<br>(48.42-57.19)                                                                                                                                                | 47.33<br>(42.91-52.10) | 46.30<br>(41.00-51.66) | 43.82<br>(39.89-51.12)                                                                 | 74.10<br>(70.51-77.32) | 70.42<br>(65.46-74.60) | 76.21<br>(74.63-77.86)                                                                                                            | 75.08<br>(73.56-76.54) | 76.95<br>(74.23-80.25) | 61.94<br>(58.14-65.87)                                                                     | 63.80<br>(60.13-67.47) | 65.90<br>(61.50-70.39) |
| Sri Lanka                      | 61.37<br>(56.85-65.19)                                                                                                                                                | 56.06<br>(51.72-60.32) | 71.01<br>(60.24-82.23) | 3.38<br>(0.00-19.04)                                                                   | 8.27<br>(3.52-22.58)   | 25.06<br>(15.32-37.23) | 95.09<br>(94.58-95.52)                                                                                                            | 93.76<br>(92.96-94.57) | 86.78<br>(84.83-89.12) | 57.46<br>(53.51-61.80)                                                                     | 50.68<br>(46.33-55.41) | 59.39<br>(51.45-67.11) |
| Seychelles                     | 39.11<br>(33.80-44.89)                                                                                                                                                | 43.81<br>(39.04-49.00) | 55.54<br>(48.46-62.08) | 43.78<br>(38.23-52.02)                                                                 | 51.29<br>(46.61-57.51) | 60.65<br>(54.13-66.93) | 80.55<br>(79.01-82.22)                                                                                                            | 76.45<br>(74.76-78.26) | 77.23<br>(74.36-80.81) | 59.05<br>(52.25-65.00)                                                                     | 50.88<br>(46.03-55.89) | 59.03<br>(53.77-64.72) |
| Thailand                       | 53.48<br>(48.60-58.02)                                                                                                                                                | 50.27<br>(44.81-55.16) | 60.77<br>(52.38-69.82) | 52.66<br>(47.14-58.93)                                                                 | 39.19<br>(34.35-47.21) | 42.45<br>(35.12-51.39) | 77.62<br>(75.81-79.79)                                                                                                            | 74.70<br>(72.84-76.79) | 73.96<br>(71.42-77.20) | 42.23<br>(36.61-47.90)                                                                     | 25.86<br>(19.24-33.52) | 36.01<br>(28.25-44.28) |
| Timor-Leste                    | 44.52<br>(34.97-53.51)                                                                                                                                                | 51.12<br>(43.68-59.81) | 61.44<br>(50.51-73.40) | 44.00<br>(32.33-56.71)                                                                 | 50.14<br>(38.42-63.66) | 55.30<br>(43.27-66.79) | 92.30<br>(90.21-94.56)                                                                                                            | 90.94<br>(88.67-93.56) | 86.92<br>(84.24-90.69) | 54.09<br>(43.39-66.13)                                                                     | 54.78<br>(43.86-67.60) | 60.22<br>(46.28-71.27) |
| Vietnam                        | 51.39<br>(43.46-58.72)                                                                                                                                                | 52.36<br>(44.71-60.78) | 60.37<br>(48.38-74.54) | 56.92<br>(48.76-65.17)                                                                 | 57.08<br>(49.84-65.18) | 60.29<br>(50.52-70.48) | 96.39<br>(95.66-97.09)                                                                                                            | 88.85<br>(87.53-90.29) | 76.64<br>(73.56-80.47) | 37.01<br>(28.00-46.81)                                                                     | 39.98<br>(31.75-49.13) | 45.18<br>(34.58-56.06) |
| Federated States of Micronesia | 26.63<br>(10.38-47.68)                                                                                                                                                | 29.14<br>(11.02-47.34) | 32.37<br>(10.17-49.37) | 35.18<br>(20.17-52.63)                                                                 | 39.93<br>(25.05-54.67) | 43.43<br>(25.30-56.32) | 90.62<br>(88.54-93.06)                                                                                                            | 90.36<br>(88.31-92.66) | 89.94<br>(87.83-92.37) | 51.28<br>(38.60-65.27)                                                                     | 54.44<br>(40.66-67.97) | 58.61<br>(42.59-70.78) |
| Fiji                           | 21.18<br>(12.51-30.61)                                                                                                                                                | 18.64<br>(11.65-26.46) | 23.68<br>(15.17-31.98) | 49.69<br>(42.84-57.25)                                                                 | 46.12<br>(40.68-53.28) | 46.75<br>(40.01-54.45) | 87.63<br>(86.66-88.53)                                                                                                            | 88.00<br>(87.10-88.80) | 84.85<br>(83.25-86.50) | 62.42<br>(55.87-69.90)                                                                     | 60.05<br>(55.00-65.09) | 61.25<br>(55.06-67.81) |
| Kiribati                       | 19.90<br>(13.10-28.10)                                                                                                                                                | 18.83<br>(11.98-26.50) | 22.09<br>(13.79-30.52) | 26.97<br>(19.78-37.85)                                                                 | 32.59<br>(25.80-42.08) | 35.65<br>(26.96-44.97) | 87.88<br>(86.82-88.94)                                                                                                            | 88.17<br>(87.19-89.01) | 87.75<br>(86.38-89.25) | 61.93<br>(56.50-67.47)                                                                     | 56.20<br>(50.80-62.48) | 61.52<br>(54.68-68.18) |

**Appendix Table 1a. Scaled values for each SDG health-related indicator and three summary indicators by country for 1990, 2000, and 2015**

| Location         | Indicator 3.4.1: Death rate due to cardiovascular disease, cancer, diabetes, and chronic respiratory disease among populations aged 30 to 70 (per 100,000 population) |                        |                        | Indicator 3.4.2: Age-standardised death rate due to self-harm (per 100,000 population) |                        |                        | Indicator 3.5.2: Risk-weighted prevalence of alcohol consumption, as measured by the summary exposure value (SEV) for alcohol use |                        |                        | Indicator 3.6.1: Age-standardised death rate due to road injuries (per 100,000 population) |                        |                        |
|------------------|-----------------------------------------------------------------------------------------------------------------------------------------------------------------------|------------------------|------------------------|----------------------------------------------------------------------------------------|------------------------|------------------------|-----------------------------------------------------------------------------------------------------------------------------------|------------------------|------------------------|--------------------------------------------------------------------------------------------|------------------------|------------------------|
|                  | 1990                                                                                                                                                                  | 2000                   | 2015                   | 1990                                                                                   | 2000                   | 2015                   | 1990                                                                                                                              | 2000                   | 2015                   | 1990                                                                                       | 2000                   | 2015                   |
| Marshall Islands | 27.55<br>(21.07-34.93)                                                                                                                                                | 26.61<br>(19.52-34.84) | 28.23<br>(19.67-36.76) | 40.07<br>(28.76-51.24)                                                                 | 41.00<br>(29.20-51.77) | 43.54<br>(33.38-54.14) | 90.08<br>(87.90-92.60)                                                                                                            | 90.22<br>(87.93-92.67) | 89.65<br>(87.37-92.27) | 51.70<br>(44.89-58.43)                                                                     | 52.17<br>(43.55-60.92) | 55.17<br>(45.75-63.08) |
| Papua New Guinea | 14.94<br>(0.77-31.38)                                                                                                                                                 | 16.02<br>(1.52-33.96)  | 18.75<br>(2.31-36.41)  | 37.10<br>(18.14-52.65)                                                                 | 40.00<br>(21.45-56.57) | 42.14<br>(25.02-57.61) | 84.82<br>(83.29-86.31)                                                                                                            | 84.80<br>(83.33-86.09) | 86.59<br>(84.71-88.69) | 30.01<br>(16.09-44.30)                                                                     | 32.40<br>(17.60-47.19) | 36.61<br>(20.96-50.95) |
| Samoa            | 35.42<br>(25.63-44.82)                                                                                                                                                | 39.67<br>(30.54-48.81) | 47.12<br>(38.07-56.77) | 39.43<br>(29.66-50.45)                                                                 | 45.10<br>(36.11-55.40) | 53.59<br>(45.28-61.43) | 85.83<br>(84.23-87.29)                                                                                                            | 85.91<br>(84.37-87.31) | 84.58<br>(82.45-87.13) | 60.84<br>(51.53-70.35)                                                                     | 63.79<br>(54.71-73.64) | 68.76<br>(60.37-77.37) |
| Solomon Islands  | 16.88<br>(2.48-34.53)                                                                                                                                                 | 18.57<br>(3.14-35.97)  | 20.68<br>(3.77-38.59)  | 33.47<br>(15.92-49.88)                                                                 | 35.72<br>(18.58-52.33) | 39.20<br>(22.17-54.36) | 94.69<br>(94.10-95.27)                                                                                                            | 94.74<br>(94.12-95.36) | 92.76<br>(91.63-93.99) | 47.08<br>(32.78-61.52)                                                                     | 47.35<br>(32.64-62.85) | 50.35<br>(33.64-64.74) |
| Tonga            | 38.03<br>(30.51-46.24)                                                                                                                                                | 38.25<br>(33.08-44.47) | 42.62<br>(33.38-50.69) | 66.68<br>(59.63-73.30)                                                                 | 64.69<br>(59.54-69.81) | 65.40<br>(58.23-72.32) | 94.54<br>(93.79-95.28)                                                                                                            | 92.37<br>(91.44-93.28) | 91.42<br>(89.93-93.07) | 58.01<br>(51.21-65.10)                                                                     | 56.94<br>(52.24-62.07) | 60.43<br>(53.25-67.71) |
| Vanuatu          | 19.54<br>(4.27-35.06)                                                                                                                                                 | 21.08<br>(4.53-40.28)  | 24.42<br>(7.28-39.72)  | 32.71<br>(16.19-48.78)                                                                 | 34.64<br>(18.60-52.09) | 38.15<br>(24.25-52.26) | 90.30<br>(89.43-91.10)                                                                                                            | 92.22<br>(91.45-92.96) | 93.41<br>(92.38-94.48) | 48.33<br>(34.32-60.95)                                                                     | 46.94<br>(31.47-61.66) | 50.37<br>(36.05-62.82) |
| Afghanistan      | 9.58<br>(0.36-21.30)                                                                                                                                                  | 6.49<br>(0.00-17.73)   | 10.43<br>(0.60-21.25)  | 58.46<br>(48.22-67.46)                                                                 | 56.14<br>(46.42-64.89) | 55.48<br>(45.60-64.28) | 97.41<br>(96.81-97.97)                                                                                                            | 97.37<br>(96.77-97.90) | 96.38<br>(95.67-97.03) | 11.12<br>(0.00-23.64)                                                                      | 9.94<br>(0.00-22.26)   | 13.10<br>(0.08-25.35)  |
| Algeria          | 54.21<br>(47.66-59.96)                                                                                                                                                | 61.14<br>(54.11-66.50) | 68.36<br>(61.36-74.96) | 84.32<br>(77.61-90.83)                                                                 | 85.76<br>(80.47-90.63) | 90.77<br>(85.44-95.47) | 95.30<br>(94.67-95.91)                                                                                                            | 94.97<br>(94.36-95.58) | 94.82<br>(94.09-95.67) | 27.93<br>(20.52-36.48)                                                                     | 33.84<br>(27.69-40.26) | 41.29<br>(35.20-48.27) |
| Bahrain          | 43.88<br>(37.17-50.48)                                                                                                                                                | 51.77<br>(45.79-57.30) | 74.16<br>(64.63-83.33) | 58.52<br>(52.41-64.75)                                                                 | 54.30<br>(48.19-61.19) | 68.91<br>(60.54-75.73) | 86.25<br>(84.97-87.67)                                                                                                            | 88.27<br>(87.13-89.55) | 89.40<br>(88.15-91.00) | 42.35<br>(35.49-48.93)                                                                     | 47.86<br>(41.85-53.86) | 62.15<br>(55.57-69.02) |
| Egypt            | 40.66<br>(36.09-45.89)                                                                                                                                                | 46.19<br>(41.61-51.12) | 46.28<br>(41.57-51.03) | 93.46<br>(82.95-97.45)                                                                 | 81.45<br>(77.41-86.81) | 84.42<br>(80.57-87.65) | 96.28<br>(95.82-96.76)                                                                                                            | 96.29<br>(95.82-96.76) | 96.35<br>(95.89-96.76) | 61.34<br>(53.96-65.77)                                                                     | 55.83<br>(51.69-59.86) | 56.84<br>(52.18-61.46) |
| Iran             | 46.42<br>(39.25-53.63)                                                                                                                                                | 49.58<br>(42.73-55.75) | 55.98<br>(46.77-65.13) | 66.07<br>(58.42-72.65)                                                                 | 65.08<br>(60.03-70.20) | 70.18<br>(61.93-77.53) | 93.81<br>(92.68-95.33)                                                                                                            | 94.23<br>(93.11-95.69) | 94.30<br>(93.15-95.75) | 19.86<br>(10.69-29.30)                                                                     | 23.86<br>(16.48-31.69) | 26.50<br>(16.70-36.01) |

**Appendix Table 1a. Scaled values for each SDG health-related indicator and three summary indicators by country for 1990, 2000, and 2015**

| Location     | Indicator 3.4.1: Death rate due to cardiovascular disease, cancer, diabetes, and chronic respiratory disease among populations aged 30 to 70 (per 100,000 population) |                        |                        | Indicator 3.4.2: Age-standardised death rate due to self-harm (per 100,000 population) |                        |                        | Indicator 3.5.2: Risk-weighted prevalence of alcohol consumption, as measured by the summary exposure value (SEV) for alcohol use |                        |                        | Indicator 3.6.1: Age-standardised death rate due to road injuries (per 100,000 population) |                        |                        |
|--------------|-----------------------------------------------------------------------------------------------------------------------------------------------------------------------|------------------------|------------------------|----------------------------------------------------------------------------------------|------------------------|------------------------|-----------------------------------------------------------------------------------------------------------------------------------|------------------------|------------------------|--------------------------------------------------------------------------------------------|------------------------|------------------------|
|              | 1990                                                                                                                                                                  | 2000                   | 2015                   | 1990                                                                                   | 2000                   | 2015                   | 1990                                                                                                                              | 2000                   | 2015                   | 1990                                                                                       | 2000                   | 2015                   |
| Iraq         | 32.13<br>(22.89-40.55)                                                                                                                                                | 28.27<br>(19.27-36.26) | 34.62<br>(23.78-45.35) | 63.97<br>(55.77-72.08)                                                                 | 58.88<br>(51.66-66.98) | 61.21<br>(51.71-70.46) | 92.83<br>(92.15-93.60)                                                                                                            | 95.26<br>(94.70-95.83) | 95.65<br>(95.02-96.32) | 38.76<br>(30.07-47.33)                                                                     | 38.54<br>(30.60-46.60) | 44.88<br>(34.45-54.83) |
| Jordan       | 46.00<br>(37.60-53.49)                                                                                                                                                | 50.70<br>(43.90-57.14) | 70.53<br>(62.80-76.99) | 71.92<br>(63.84-80.81)                                                                 | 75.68<br>(69.55-81.97) | 87.82<br>(82.55-92.61) | 96.50<br>(95.99-96.96)                                                                                                            | 96.03<br>(95.45-96.56) | 95.47<br>(94.77-96.28) | 40.62<br>(32.45-49.87)                                                                     | 48.33<br>(42.10-54.55) | 58.93<br>(53.18-64.58) |
| Kuwait       | 69.53<br>(64.01-73.49)                                                                                                                                                | 65.18<br>(60.58-69.02) | 79.55<br>(70.93-86.31) | 97.80<br>(93.26-100.00)                                                                | 86.51<br>(82.29-89.54) | 90.93<br>(84.89-96.02) | 97.63<br>(97.21-97.98)                                                                                                            | 97.67<br>(97.23-98.03) | 97.53<br>(97.14-97.87) | 45.28<br>(40.41-50.89)                                                                     | 43.56<br>(38.88-48.92) | 57.56<br>(51.20-63.54) |
| Lebanon      | 41.48<br>(32.61-50.61)                                                                                                                                                | 58.12<br>(49.30-65.87) | 67.06<br>(53.59-82.07) | 77.11<br>(68.58-85.25)                                                                 | 84.51<br>(77.29-91.38) | 89.50<br>(80.31-98.74) | 84.84<br>(83.70-85.99)                                                                                                            | 87.73<br>(86.85-88.66) | 87.97<br>(86.15-89.98) | 55.22<br>(46.91-62.50)                                                                     | 67.21<br>(57.78-74.68) | 75.67<br>(64.54-85.76) |
| Libya        | 60.20<br>(53.20-67.01)                                                                                                                                                | 60.62<br>(54.40-65.88) | 59.23<br>(51.43-66.70) | 79.53<br>(73.17-85.66)                                                                 | 76.60<br>(70.91-81.57) | 74.93<br>(67.88-80.84) | 97.48<br>(97.07-97.88)                                                                                                            | 97.49<br>(97.05-97.89) | 97.43<br>(97.01-97.79) | 39.60<br>(32.30-47.60)                                                                     | 42.36<br>(36.29-48.67) | 44.45<br>(37.72-51.66) |
| Morocco      | 49.62<br>(41.29-56.80)                                                                                                                                                | 55.04<br>(45.74-63.52) | 59.90<br>(47.44-72.78) | 59.89<br>(52.84-67.39)                                                                 | 61.79<br>(54.61-68.94) | 62.49<br>(52.82-71.63) | 96.47<br>(95.96-97.00)                                                                                                            | 96.49<br>(95.97-97.03) | 96.90<br>(96.47-97.35) | 38.85<br>(31.40-46.88)                                                                     | 44.36<br>(37.80-51.07) | 49.40<br>(39.79-58.00) |
| Palestine    | 49.66<br>(38.27-59.78)                                                                                                                                                | 56.03<br>(49.53-62.06) | 51.71<br>(41.54-62.64) | 86.77<br>(77.79-94.90)                                                                 | 89.76<br>(83.54-94.27) | 90.70<br>(82.44-98.35) | 94.20<br>(93.07-95.59)                                                                                                            | 94.43<br>(93.37-95.74) | 95.42<br>(94.50-96.46) | 54.93<br>(46.43-62.14)                                                                     | 62.35<br>(57.02-67.61) | 61.24<br>(52.74-69.07) |
| Oman         | 57.33<br>(46.39-70.09)                                                                                                                                                | 58.36<br>(50.02-67.34) | 66.78<br>(58.39-76.50) | 89.37<br>(78.10-99.98)                                                                 | 87.31<br>(80.34-93.46) | 84.13<br>(77.32-90.72) | 95.50<br>(94.85-96.14)                                                                                                            | 95.22<br>(94.52-95.82) | 95.04<br>(94.05-95.96) | 10.08<br>(0.00-23.03)                                                                      | 16.87<br>(8.14-26.50)  | 24.53<br>(14.83-34.02) |
| Qatar        | 59.94<br>(52.56-66.34)                                                                                                                                                | 57.71<br>(50.60-64.17) | 81.52<br>(68.36-93.71) | 70.53<br>(62.69-77.50)                                                                 | 65.93<br>(59.21-72.40) | 75.16<br>(67.24-82.83) | 92.06<br>(90.97-93.21)                                                                                                            | 93.89<br>(93.08-94.67) | 91.43<br>(90.06-93.03) | 20.47<br>(12.22-29.28)                                                                     | 20.82<br>(13.02-29.56) | 35.64<br>(25.59-44.87) |
| Saudi Arabia | 71.88<br>(65.11-77.93)                                                                                                                                                | 74.65<br>(68.91-79.30) | 83.06<br>(75.37-88.99) | 91.11<br>(83.00-97.26)                                                                 | 90.53<br>(84.09-94.92) | 85.74<br>(81.13-90.33) | 96.59<br>(96.20-96.91)                                                                                                            | 97.14<br>(96.83-97.42) | 97.12<br>(96.82-97.41) | 28.00<br>(20.95-36.40)                                                                     | 32.67<br>(26.59-39.74) | 39.97<br>(33.29-46.63) |
| Sudan        | 33.60<br>(23.99-43.88)                                                                                                                                                | 36.75<br>(24.89-47.93) | 42.56<br>(30.53-55.95) | 69.58<br>(56.73-82.10)                                                                 | 66.90<br>(52.49-80.17) | 67.27<br>(54.35-79.74) | 90.58<br>(89.60-91.60)                                                                                                            | 89.41<br>(88.46-90.35) | 89.56<br>(88.47-90.88) | 26.84<br>(12.41-40.15)                                                                     | 26.73<br>(12.13-40.30) | 29.78<br>(16.16-41.89) |

**Appendix Table 1a. Scaled values for each SDG health-related indicator and three summary indicators by country for 1990, 2000, and 2015**

| Location             | Indicator 3.4.1: Death rate due to cardiovascular disease, cancer, diabetes, and chronic respiratory disease among populations aged 30 to 70 (per 100,000 population) |                        |                        | Indicator 3.4.2: Age-standardised death rate due to self-harm (per 100,000 population) |                        |                        | Indicator 3.5.2: Risk-weighted prevalence of alcohol consumption, as measured by the summary exposure value (SEV) for alcohol use |                        |                        | Indicator 3.6.1: Age-standardised death rate due to road injuries (per 100,000 population) |                        |                        |
|----------------------|-----------------------------------------------------------------------------------------------------------------------------------------------------------------------|------------------------|------------------------|----------------------------------------------------------------------------------------|------------------------|------------------------|-----------------------------------------------------------------------------------------------------------------------------------|------------------------|------------------------|--------------------------------------------------------------------------------------------|------------------------|------------------------|
|                      | 1990                                                                                                                                                                  | 2000                   | 2015                   | 1990                                                                                   | 2000                   | 2015                   | 1990                                                                                                                              | 2000                   | 2015                   | 1990                                                                                       | 2000                   | 2015                   |
| Syria                | 41.81<br>(33.73-49.35)                                                                                                                                                | 49.74<br>(41.94-56.69) | 58.44<br>(50.82-66.94) | 88.48<br>(79.99-96.87)                                                                 | 90.70<br>(84.17-97.17) | 92.32<br>(86.22-98.12) | 94.87<br>(94.28-95.61)                                                                                                            | 95.29<br>(94.65-96.11) | 95.22<br>(94.64-95.96) | 47.27<br>(40.15-55.50)                                                                     | 52.26<br>(45.26-61.66) | 59.36<br>(53.71-66.93) |
| Tunisia              | 58.71<br>(52.96-64.01)                                                                                                                                                | 62.25<br>(55.34-68.37) | 68.92<br>(58.04-79.68) | 71.38<br>(64.72-77.27)                                                                 | 71.50<br>(65.89-76.96) | 74.91<br>(67.68-81.86) | 93.88<br>(93.36-94.45)                                                                                                            | 94.10<br>(93.64-94.62) | 93.54<br>(92.76-94.55) | 37.81<br>(31.20-44.78)                                                                     | 43.01<br>(36.69-49.30) | 51.20<br>(42.84-59.40) |
| Turkey               | 42.82<br>(37.05-48.62)                                                                                                                                                | 54.71<br>(49.32-59.58) | 72.96<br>(67.45-77.13) | 56.81<br>(49.86-65.12)                                                                 | 61.71<br>(57.18-66.87) | 80.79<br>(69.70-85.49) | 88.91<br>(87.99-89.90)                                                                                                            | 85.04<br>(84.04-86.08) | 89.52<br>(87.94-91.37) | 47.87<br>(40.82-55.65)                                                                     | 59.36<br>(54.17-64.51) | 66.20<br>(61.07-70.96) |
| United Arab Emirates | 43.14<br>(33.78-52.72)                                                                                                                                                | 49.19<br>(42.95-55.88) | 53.45<br>(41.63-65.16) | 70.97<br>(60.85-81.66)                                                                 | 69.64<br>(62.90-77.65) | 81.14<br>(71.92-90.83) | 80.90<br>(79.22-82.78)                                                                                                            | 86.51<br>(84.95-88.38) | 85.21<br>(83.08-87.98) | 15.51<br>(4.26-27.81)                                                                      | 21.24<br>(13.25-30.81) | 27.08<br>(16.08-37.71) |
| Yemen                | 29.12<br>(11.42-50.17)                                                                                                                                                | 31.43<br>(12.20-52.92) | 36.20<br>(14.88-57.15) | 71.21<br>(51.40-91.40)                                                                 | 67.17<br>(48.08-85.59) | 66.54<br>(47.62-84.67) | 93.54<br>(92.86-94.30)                                                                                                            | 95.75<br>(95.23-96.29) | 96.85<br>(96.37-97.32) | 25.01<br>(7.99-44.20)                                                                      | 25.25<br>(6.97-43.92)  | 28.67<br>(10.42-45.44) |
| Bangladesh           | 44.31<br>(38.29-50.36)                                                                                                                                                | 46.43<br>(40.10-52.25) | 47.28<br>(39.92-54.68) | 51.67<br>(45.71-58.41)                                                                 | 54.44<br>(49.10-60.91) | 56.95<br>(50.70-64.75) | 99.11<br>(98.79-99.40)                                                                                                            | 99.00<br>(98.64-99.32) | 98.95<br>(98.62-99.28) | 68.76<br>(61.54-73.82)                                                                     | 63.13<br>(58.61-67.79) | 56.25<br>(49.66-65.71) |
| Bhutan               | 49.08<br>(38.76-58.98)                                                                                                                                                | 55.57<br>(46.44-64.04) | 64.70<br>(53.56-76.14) | 61.03<br>(50.32-71.76)                                                                 | 62.72<br>(54.90-71.01) | 65.36<br>(56.11-73.78) | 90.91<br>(89.85-92.13)                                                                                                            | 90.07<br>(88.95-91.44) | 92.61<br>(91.21-94.27) | 53.49<br>(43.87-63.41)                                                                     | 57.76<br>(50.11-65.44) | 66.86<br>(58.34-74.85) |
| India                | 36.58<br>(31.91-42.21)                                                                                                                                                | 38.59<br>(33.96-43.94) | 45.72<br>(40.81-50.39) | 47.62<br>(42.81-58.36)                                                                 | 38.18<br>(32.28-57.61) | 39.96<br>(33.29-59.02) | 87.18<br>(86.25-88.18)                                                                                                            | 85.37<br>(84.41-86.45) | 83.35<br>(81.90-85.09) | 39.84<br>(34.22-45.99)                                                                     | 37.81<br>(32.43-43.90) | 39.71<br>(33.47-45.94) |
| Nepal                | 47.60<br>(38.09-56.42)                                                                                                                                                | 53.55<br>(46.24-60.26) | 56.56<br>(46.44-66.68) | 65.16<br>(53.85-72.61)                                                                 | 62.87<br>(55.16-69.47) | 62.91<br>(52.74-71.67) | 96.08<br>(95.64-96.50)                                                                                                            | 90.74<br>(90.00-91.50) | 89.20<br>(87.75-90.94) | 39.05<br>(30.11-48.73)                                                                     | 39.52<br>(29.45-48.45) | 40.34<br>(26.34-50.44) |
| Pakistan             | 40.38<br>(33.12-47.62)                                                                                                                                                | 32.83<br>(26.01-40.19) | 36.13<br>(28.72-43.73) | 78.16<br>(60.20-85.25)                                                                 | 76.54<br>(57.62-84.29) | 85.40<br>(62.50-93.00) | 99.44<br>(99.17-99.69)                                                                                                            | 99.37<br>(99.10-99.63) | 99.49<br>(99.24-99.71) | 57.04<br>(48.30-64.28)                                                                     | 50.79<br>(41.73-59.48) | 52.36<br>(42.48-62.86) |
| Botswana             | 46.55<br>(8.04-82.18)                                                                                                                                                 | 40.94<br>(0.00-79.78)  | 45.33<br>(0.70-76.57)  | 41.44<br>(8.53-68.10)                                                                  | 33.10<br>(0.00-64.62)  | 34.25<br>(0.00-61.58)  | 74.75<br>(72.67-76.90)                                                                                                            | 72.64<br>(70.55-74.91) | 69.47<br>(66.82-72.48) | 46.43<br>(15.34-69.64)                                                                     | 40.55<br>(0.00-67.45)  | 41.94<br>(2.48-65.55)  |

**Appendix Table 1a. Scaled values for each SDG health-related indicator and three summary indicators by country for 1990, 2000, and 2015**

| Location      | Indicator 3.4.1: Death rate due to cardiovascular disease, cancer, diabetes, and chronic respiratory disease among populations aged 30 to 70 (per 100,000 population) |                        |                        | Indicator 3.4.2: Age-standardised death rate due to self-harm (per 100,000 population) |                        |                        | Indicator 3.5.2: Risk-weighted prevalence of alcohol consumption, as measured by the summary exposure value (SEV) for alcohol use |                        |                        | Indicator 3.6.1: Age-standardised death rate due to road injuries (per 100,000 population) |                        |                        |
|---------------|-----------------------------------------------------------------------------------------------------------------------------------------------------------------------|------------------------|------------------------|----------------------------------------------------------------------------------------|------------------------|------------------------|-----------------------------------------------------------------------------------------------------------------------------------|------------------------|------------------------|--------------------------------------------------------------------------------------------|------------------------|------------------------|
|               | 1990                                                                                                                                                                  | 2000                   | 2015                   | 1990                                                                                   | 2000                   | 2015                   | 1990                                                                                                                              | 2000                   | 2015                   | 1990                                                                                       | 2000                   | 2015                   |
| Lesotho       | 43.65<br>(30.97-57.78)                                                                                                                                                | 37.91<br>(23.77-50.65) | 23.27<br>(2.62-48.07)  | 44.13<br>(29.69-55.69)                                                                 | 38.29<br>(24.16-51.11) | 22.79<br>(0.00-45.39)  | 77.29<br>(75.60-78.93)                                                                                                            | 76.03<br>(74.26-77.82) | 73.73<br>(71.24-76.34) | 35.36<br>(22.29-46.57)                                                                     | 31.19<br>(17.29-45.20) | 18.32<br>(0.00-40.45)  |
| Namibia       | 42.88<br>(35.01-51.28)                                                                                                                                                | 29.83<br>(18.94-41.67) | 59.78<br>(36.51-82.12) | 38.62<br>(28.97-48.07)                                                                 | 28.92<br>(16.71-41.68) | 45.42<br>(25.44-63.71) | 94.36<br>(93.57-95.08)                                                                                                            | 78.14<br>(75.68-80.51) | 65.68<br>(62.15-69.78) | 28.64<br>(20.28-37.46)                                                                     | 19.60<br>(7.67-32.13)  | 36.17<br>(17.46-52.84) |
| South Africa  | 40.06<br>(34.67-45.94)                                                                                                                                                | 34.34<br>(27.87-41.51) | 43.01<br>(36.89-49.22) | 37.72<br>(31.96-47.16)                                                                 | 33.41<br>(27.82-42.64) | 43.26<br>(37.64-51.17) | 65.78<br>(63.64-67.85)                                                                                                            | 66.89<br>(64.84-68.83) | 65.76<br>(63.67-67.79) | 17.98<br>(8.90-27.35)                                                                      | 16.78<br>(9.05-25.60)  | 28.55<br>(21.62-36.24) |
| Swaziland     | 35.87<br>(22.56-50.73)                                                                                                                                                | 31.20<br>(14.31-47.90) | 27.74<br>(3.69-59.64)  | 39.02<br>(25.47-52.45)                                                                 | 30.22<br>(14.00-46.43) | 24.50<br>(0.00-54.15)  | 78.23<br>(76.75-79.65)                                                                                                            | 78.25<br>(76.76-79.66) | 78.92<br>(77.23-80.91) | 27.52<br>(15.06-39.81)                                                                     | 20.61<br>(6.16-36.87)  | 15.19<br>(0.00-39.17)  |
| Zimbabwe      | 49.12<br>(38.81-62.31)                                                                                                                                                | 41.57<br>(21.73-57.12) | 50.93<br>(28.78-74.63) | 33.42<br>(19.40-46.44)                                                                 | 24.01<br>(5.23-40.73)  | 22.92<br>(6.56-41.59)  | 76.71<br>(75.05-78.42)                                                                                                            | 78.17<br>(76.44-79.90) | 78.55<br>(76.40-80.90) | 31.04<br>(14.97-44.77)                                                                     | 23.16<br>(1.16-42.87)  | 30.57<br>(14.29-47.11) |
| Benin         | 52.17<br>(43.72-60.35)                                                                                                                                                | 48.27<br>(38.41-58.53) | 46.11<br>(21.90-73.16) | 57.49<br>(48.44-66.31)                                                                 | 49.02<br>(39.16-58.07) | 47.12<br>(27.08-65.21) | 87.94<br>(86.93-89.08)                                                                                                            | 87.47<br>(86.40-88.69) | 87.62<br>(86.45-88.99) | 36.47<br>(23.34-52.18)                                                                     | 37.49<br>(26.59-49.60) | 50.08<br>(32.33-67.31) |
| Burkina Faso  | 50.09<br>(41.07-58.77)                                                                                                                                                | 50.65<br>(40.30-60.75) | 51.52<br>(29.86-74.22) | 49.27<br>(41.61-57.01)                                                                 | 48.69<br>(40.72-57.66) | 50.17<br>(33.79-65.65) | 67.65<br>(65.73-69.42)                                                                                                            | 66.29<br>(64.17-68.21) | 66.51<br>(64.27-68.99) | 40.42<br>(32.83-48.21)                                                                     | 43.07<br>(36.05-50.53) | 45.62<br>(30.82-59.51) |
| Cameroon      | 46.88<br>(38.64-55.03)                                                                                                                                                | 42.23<br>(30.62-55.67) | 47.35<br>(24.44-71.12) | 53.54<br>(45.83-61.16)                                                                 | 44.37<br>(34.71-55.45) | 45.48<br>(26.56-62.87) | 75.02<br>(73.52-76.50)                                                                                                            | 76.27<br>(74.77-77.84) | 74.38<br>(72.67-76.11) | 43.06<br>(34.64-51.92)                                                                     | 42.65<br>(31.81-53.76) | 48.19<br>(31.63-63.77) |
| Cape Verde    | 49.08<br>(44.23-54.07)                                                                                                                                                | 50.63<br>(36.92-64.24) | 59.85<br>(49.47-68.47) | 53.74<br>(42.57-61.30)                                                                 | 30.61<br>(15.48-47.08) | 38.61<br>(28.49-48.93) | 78.24<br>(76.84-79.86)                                                                                                            | 76.44<br>(74.88-77.99) | 75.78<br>(74.23-77.44) | 70.85<br>(65.29-76.41)                                                                     | 58.44<br>(47.84-69.34) | 66.97<br>(59.52-73.24) |
| Chad          | 56.66<br>(47.26-65.79)                                                                                                                                                | 48.03<br>(37.02-59.44) | 50.04<br>(24.35-79.86) | 68.08<br>(59.33-76.52)                                                                 | 56.10<br>(45.94-66.10) | 55.05<br>(36.06-73.72) | 84.21<br>(83.18-85.21)                                                                                                            | 82.02<br>(80.70-83.15) | 80.52<br>(78.87-82.28) | 56.28<br>(46.65-65.96)                                                                     | 47.78<br>(38.08-57.83) | 47.13<br>(29.79-63.72) |
| Cote d'Ivoire | 44.03<br>(34.09-53.79)                                                                                                                                                | 38.88<br>(26.74-51.91) | 46.61<br>(25.94-69.47) | 43.53<br>(34.68-52.53)                                                                 | 36.56<br>(26.29-47.21) | 41.53<br>(23.55-58.63) | 81.55<br>(78.97-84.67)                                                                                                            | 81.20<br>(78.59-84.49) | 81.39<br>(78.81-84.64) | 37.22<br>(27.26-46.35)                                                                     | 33.87<br>(23.73-44.06) | 42.78<br>(26.03-58.60) |

**Appendix Table 1a. Scaled values for each SDG health-related indicator and three summary indicators by country for 1990, 2000, and 2015**

| Location              | Indicator 3.4.1: Death rate due to cardiovascular disease, cancer, diabetes, and chronic respiratory disease among populations aged 30 to 70 (per 100,000 population) |                        |                        | Indicator 3.4.2: Age-standardised death rate due to self-harm (per 100,000 population) |                        |                         | Indicator 3.5.2: Risk-weighted prevalence of alcohol consumption, as measured by the summary exposure value (SEV) for alcohol use |                        |                        | Indicator 3.6.1: Age-standardised death rate due to road injuries (per 100,000 population) |                        |                        |
|-----------------------|-----------------------------------------------------------------------------------------------------------------------------------------------------------------------|------------------------|------------------------|----------------------------------------------------------------------------------------|------------------------|-------------------------|-----------------------------------------------------------------------------------------------------------------------------------|------------------------|------------------------|--------------------------------------------------------------------------------------------|------------------------|------------------------|
|                       | 1990                                                                                                                                                                  | 2000                   | 2015                   | 1990                                                                                   | 2000                   | 2015                    | 1990                                                                                                                              | 2000                   | 2015                   | 1990                                                                                       | 2000                   | 2015                   |
| The Gambia            | 49.67<br>(27.47-72.74)                                                                                                                                                | 50.34<br>(39.80-62.09) | 55.14<br>(37.74-73.11) | 64.40<br>(48.85-79.45)                                                                 | 61.36<br>(51.45-70.29) | 62.86<br>(48.42-74.59)  | 86.57<br>(85.24-88.04)                                                                                                            | 84.41<br>(83.11-85.88) | 83.65<br>(82.23-85.43) | 50.53<br>(35.73-63.47)                                                                     | 50.45<br>(42.34-59.18) | 53.16<br>(40.86-63.90) |
| Ghana                 | 44.02<br>(27.97-59.81)                                                                                                                                                | 45.92<br>(33.95-59.02) | 50.57<br>(27.48-78.24) | 61.33<br>(47.70-74.37)                                                                 | 61.37<br>(50.98-71.37) | 58.10<br>(38.74-74.43)  | 79.44<br>(77.96-80.79)                                                                                                            | 81.60<br>(80.18-82.99) | 77.64<br>(75.51-80.04) | 44.13<br>(32.98-55.09)                                                                     | 48.01<br>(39.13-57.30) | 50.34<br>(33.17-66.57) |
| Guinea                | 49.06<br>(40.78-57.25)                                                                                                                                                | 46.69<br>(38.48-55.16) | 45.00<br>(27.09-65.17) | 65.90<br>(56.48-74.02)                                                                 | 57.34<br>(48.95-65.50) | 54.92<br>(39.97-70.18)  | 94.02<br>(93.40-94.62)                                                                                                            | 93.80<br>(93.14-94.44) | 94.50<br>(93.81-95.12) | 52.08<br>(43.28-60.80)                                                                     | 49.34<br>(41.81-56.93) | 53.04<br>(38.49-66.83) |
| Guinea-Bissau         | 46.80<br>(7.20-85.79)                                                                                                                                                 | 47.78<br>(5.91-86.90)  | 46.46<br>(0.00-82.57)  | 60.87<br>(31.50-85.89)                                                                 | 55.28<br>(23.36-81.09) | 53.34<br>(14.38-77.91)  | 81.09<br>(79.92-82.40)                                                                                                            | 81.74<br>(80.54-83.04) | 81.78<br>(80.48-83.26) | 47.77<br>(18.98-69.36)                                                                     | 46.87<br>(15.54-69.75) | 48.03<br>(12.89-70.39) |
| Liberia               | 52.16<br>(38.10-66.22)                                                                                                                                                | 61.31<br>(50.44-73.57) | 55.63<br>(36.46-77.03) | 59.63<br>(48.20-71.29)                                                                 | 62.07<br>(50.80-73.39) | 57.84<br>(42.84-70.86)  | 75.43<br>(73.94-77.00)                                                                                                            | 77.89<br>(76.53-79.42) | 79.61<br>(78.28-81.23) | 45.25<br>(35.70-55.12)                                                                     | 54.98<br>(47.08-63.06) | 56.71<br>(44.08-68.26) |
| Mali                  | 40.35<br>(32.29-48.35)                                                                                                                                                | 45.48<br>(37.16-53.58) | 51.04<br>(30.82-70.87) | 63.58<br>(54.85-70.72)                                                                 | 63.56<br>(54.90-71.69) | 64.74<br>(50.40-77.14)  | 95.96<br>(95.53-96.41)                                                                                                            | 96.12<br>(95.68-96.53) | 95.87<br>(95.37-96.36) | 50.29<br>(42.25-58.26)                                                                     | 52.82<br>(45.25-60.37) | 58.49<br>(45.40-69.54) |
| Mauritania            | 44.16<br>(35.59-52.63)                                                                                                                                                | 55.17<br>(45.22-66.17) | 63.92<br>(42.98-89.01) | 60.55<br>(52.17-68.68)                                                                 | 62.54<br>(53.09-72.05) | 65.54<br>(48.60-81.48)  | 98.74<br>(98.55-98.96)                                                                                                            | 99.65<br>(99.56-99.74) | 99.90<br>(99.81-99.99) | 49.19<br>(40.07-57.58)                                                                     | 56.83<br>(47.84-66.84) | 62.49<br>(46.90-76.90) |
| Niger                 | 54.35<br>(45.79-63.35)                                                                                                                                                | 59.27<br>(50.11-67.44) | 57.36<br>(37.61-77.13) | 66.82<br>(56.35-76.12)                                                                 | 64.93<br>(55.83-73.92) | 61.46<br>(46.22-75.96)  | 96.20<br>(95.71-96.66)                                                                                                            | 96.08<br>(95.58-96.53) | 96.20<br>(95.71-96.65) | 53.64<br>(43.34-63.05)                                                                     | 58.29<br>(49.05-67.58) | 59.28<br>(44.29-73.68) |
| Nigeria               | 54.93<br>(37.25-72.72)                                                                                                                                                | 58.92<br>(48.06-69.90) | 73.08<br>(49.40-88.75) | 63.60<br>(50.69-76.68)                                                                 | 61.68<br>(52.91-70.40) | 66.83<br>(51.59-77.63)  | 65.86<br>(64.01-67.65)                                                                                                            | 62.50<br>(60.31-64.51) | 63.88<br>(61.87-65.97) | 47.47<br>(30.75-60.93)                                                                     | 56.51<br>(48.65-64.21) | 73.11<br>(60.33-81.19) |
| Sao Tome and Principe | 53.61<br>(45.13-61.43)                                                                                                                                                | 47.78<br>(39.23-57.12) | 48.02<br>(27.75-73.79) | 90.72<br>(84.35-95.94)                                                                 | 88.31<br>(81.28-94.98) | 85.49<br>(70.15-100.00) | 79.55<br>(78.12-81.11)                                                                                                            | 74.51<br>(72.85-76.23) | 75.60<br>(74.01-77.42) | 52.23<br>(45.09-59.43)                                                                     | 50.84<br>(43.37-58.22) | 54.76<br>(39.55-70.53) |
| Senegal               | 50.11<br>(41.00-59.02)                                                                                                                                                | 50.55<br>(40.08-60.08) | 49.67<br>(24.78-76.36) | 50.85<br>(43.17-59.34)                                                                 | 48.36<br>(39.91-56.69) | 46.96<br>(28.25-64.01)  | 93.32<br>(92.58-94.12)                                                                                                            | 93.66<br>(92.88-94.44) | 93.84<br>(93.10-94.62) | 52.35<br>(41.86-61.14)                                                                     | 52.61<br>(42.96-61.29) | 54.33<br>(36.26-70.70) |

**Appendix Table 1a. Scaled values for each SDG health-related indicator and three summary indicators by country for 1990, 2000, and 2015**

| Location     | Indicator 3.4.1: Death rate due to cardiovascular disease, cancer, diabetes, and chronic respiratory disease among populations aged 30 to 70 (per 100,000 population) |                        |                        | Indicator 3.4.2: Age-standardised death rate due to self-harm (per 100,000 population) |                        |                        | Indicator 3.5.2: Risk-weighted prevalence of alcohol consumption, as measured by the summary exposure value (SEV) for alcohol use |                        |                        | Indicator 3.6.1: Age-standardised death rate due to road injuries (per 100,000 population) |                        |                        |
|--------------|-----------------------------------------------------------------------------------------------------------------------------------------------------------------------|------------------------|------------------------|----------------------------------------------------------------------------------------|------------------------|------------------------|-----------------------------------------------------------------------------------------------------------------------------------|------------------------|------------------------|--------------------------------------------------------------------------------------------|------------------------|------------------------|
|              | 1990                                                                                                                                                                  | 2000                   | 2015                   | 1990                                                                                   | 2000                   | 2015                   | 1990                                                                                                                              | 2000                   | 2015                   | 1990                                                                                       | 2000                   | 2015                   |
| Sierra Leone | 54.82<br>(39.12-72.75)                                                                                                                                                | 48.81<br>(39.94-56.79) | 44.57<br>(25.99-64.23) | 64.82<br>(52.48-77.90)                                                                 | 56.81<br>(47.35-66.18) | 54.07<br>(39.77-68.61) | 76.07<br>(74.65-77.51)                                                                                                            | 72.73<br>(71.01-74.36) | 73.24<br>(71.59-74.91) | 47.67<br>(34.07-60.68)                                                                     | 45.56<br>(34.91-55.98) | 46.55<br>(32.06-60.54) |
| Togo         | 47.13<br>(37.96-56.69)                                                                                                                                                | 45.10<br>(34.19-57.70) | 47.98<br>(29.28-69.08) | 54.26<br>(46.05-63.02)                                                                 | 45.96<br>(36.55-56.35) | 46.59<br>(30.88-62.55) | 82.99<br>(81.84-84.32)                                                                                                            | 86.57<br>(85.47-87.88) | 87.02<br>(85.71-88.67) | 47.69<br>(40.69-54.86)                                                                     | 44.91<br>(35.56-54.55) | 46.24<br>(30.49-62.64) |
| Burundi      | 17.35<br>(2.96-34.62)                                                                                                                                                 | 26.46<br>(16.55-37.11) | 46.95<br>(26.31-69.46) | 29.21<br>(12.18-47.80)                                                                 | 34.32<br>(21.79-46.69) | 49.07<br>(32.41-65.01) | 69.71<br>(67.69-71.62)                                                                                                            | 70.13<br>(68.09-72.03) | 70.75<br>(68.70-72.86) | 18.90<br>(3.08-35.99)                                                                      | 24.74<br>(13.35-35.74) | 36.52<br>(18.63-52.83) |
| Comoros      | 35.11<br>(15.39-57.72)                                                                                                                                                | 44.01<br>(33.21-54.04) | 53.89<br>(35.52-73.20) | 49.88<br>(32.74-65.47)                                                                 | 52.24<br>(41.70-61.02) | 56.38<br>(40.83-70.36) | 97.72<br>(97.42-98.00)                                                                                                            | 97.86<br>(97.56-98.15) | 97.73<br>(97.41-98.05) | 36.79<br>(19.49-52.96)                                                                     | 44.39<br>(32.17-54.16) | 50.62<br>(33.31-64.84) |
| Djibouti     | 45.43<br>(25.74-65.33)                                                                                                                                                | 44.95<br>(18.10-76.10) | 46.30<br>(18.12-75.17) | 57.31<br>(42.43-72.07)                                                                 | 54.26<br>(31.31-73.84) | 52.74<br>(30.43-72.00) | 81.61<br>(79.52-84.51)                                                                                                            | 82.56<br>(80.45-85.57) | 82.33<br>(80.20-85.26) | 41.82<br>(25.16-56.54)                                                                     | 42.21<br>(19.66-61.32) | 44.46<br>(21.65-63.27) |
| Eritrea      | 30.64<br>(20.92-39.68)                                                                                                                                                | 44.89<br>(24.99-70.75) | 40.07<br>(12.99-71.98) | 42.17<br>(31.90-52.63)                                                                 | 48.50<br>(32.39-64.25) | 44.80<br>(22.37-64.64) | 92.91<br>(91.88-94.00)                                                                                                            | 89.19<br>(87.83-90.58) | 92.10<br>(90.56-93.66) | 39.81<br>(30.65-49.64)                                                                     | 45.72<br>(28.32-61.96) | 42.87<br>(22.98-62.32) |
| Ethiopia     | 26.86<br>(18.75-35.81)                                                                                                                                                | 38.30<br>(29.71-46.91) | 52.36<br>(30.89-75.48) | 33.93<br>(24.39-46.20)                                                                 | 43.43<br>(35.65-52.71) | 49.90<br>(32.60-64.46) | 84.13<br>(82.94-85.33)                                                                                                            | 81.53<br>(80.28-82.72) | 79.12<br>(76.95-81.86) | 28.14<br>(18.29-39.19)                                                                     | 38.93<br>(31.31-46.81) | 48.84<br>(31.81-62.46) |
| Kenya        | 58.79<br>(51.32-65.50)                                                                                                                                                | 59.00<br>(50.62-66.25) | 61.84<br>(53.89-69.43) | 51.99<br>(44.13-59.92)                                                                 | 51.79<br>(45.76-58.60) | 52.15<br>(46.13-59.22) | 77.51<br>(75.74-79.45)                                                                                                            | 80.59<br>(78.77-82.42) | 81.30<br>(78.78-84.38) | 49.71<br>(39.25-56.99)                                                                     | 50.40<br>(42.81-57.10) | 52.38<br>(45.59-58.85) |
| Madagascar   | 32.71<br>(25.16-39.89)                                                                                                                                                | 35.93<br>(26.84-50.49) | 38.56<br>(17.85-61.86) | 47.89<br>(41.47-55.70)                                                                 | 51.24<br>(42.33-63.44) | 51.71<br>(35.70-68.02) | 86.12<br>(84.81-87.45)                                                                                                            | 89.72<br>(88.54-90.77) | 90.67<br>(89.27-92.26) | 45.26<br>(38.32-52.38)                                                                     | 50.18<br>(40.99-61.52) | 53.30<br>(38.11-68.73) |
| Malawi       | 49.26<br>(37.76-60.71)                                                                                                                                                | 42.91<br>(26.61-59.60) | 54.66<br>(32.95-77.55) | 48.34<br>(38.27-58.98)                                                                 | 45.21<br>(32.41-57.30) | 51.81<br>(35.06-65.51) | 91.16<br>(90.45-91.89)                                                                                                            | 91.21<br>(90.45-92.03) | 90.96<br>(89.95-92.20) | 40.04<br>(29.72-49.62)                                                                     | 40.50<br>(28.49-52.03) | 49.80<br>(33.63-63.11) |
| Mozambique   | 48.43<br>(39.55-56.98)                                                                                                                                                | 44.20<br>(33.10-56.42) | 43.90<br>(22.34-71.19) | 50.82<br>(40.91-60.05)                                                                 | 46.53<br>(37.47-56.03) | 42.90<br>(24.08-61.49) | 93.77<br>(93.06-94.43)                                                                                                            | 90.28<br>(89.12-91.52) | 88.52<br>(86.83-90.49) | 40.71<br>(32.96-48.38)                                                                     | 37.74<br>(28.89-46.78) | 40.23<br>(22.48-58.07) |

**Appendix Table 1a. Scaled values for each SDG health-related indicator and three summary indicators by country for 1990, 2000, and 2015**

| Location                         | Indicator 3.4.1: Death rate due to cardiovascular disease, cancer, diabetes, and chronic respiratory disease among populations aged 30 to 70 (per 100,000 population) |                        |                        | Indicator 3.4.2: Age-standardised death rate due to self-harm (per 100,000 population) |                        |                        | Indicator 3.5.2: Risk-weighted prevalence of alcohol consumption, as measured by the summary exposure value (SEV) for alcohol use |                        |                        | Indicator 3.6.1: Age-standardised death rate due to road injuries (per 100,000 population) |                        |                        |
|----------------------------------|-----------------------------------------------------------------------------------------------------------------------------------------------------------------------|------------------------|------------------------|----------------------------------------------------------------------------------------|------------------------|------------------------|-----------------------------------------------------------------------------------------------------------------------------------|------------------------|------------------------|--------------------------------------------------------------------------------------------|------------------------|------------------------|
|                                  | 1990                                                                                                                                                                  | 2000                   | 2015                   | 1990                                                                                   | 2000                   | 2015                   | 1990                                                                                                                              | 2000                   | 2015                   | 1990                                                                                       | 2000                   | 2015                   |
| Rwanda                           | 29.17<br>(19.27-38.93)                                                                                                                                                | 32.16<br>(21.87-42.08) | 55.77<br>(32.46-77.36) | 40.79<br>(29.09-51.91)                                                                 | 39.62<br>(28.28-50.49) | 54.59<br>(37.25-68.24) | 69.65<br>(67.63-71.52)                                                                                                            | 70.59<br>(68.57-72.48) | 70.06<br>(67.96-72.13) | 22.39<br>(9.98-34.31)                                                                      | 19.74<br>(7.68-32.03)  | 35.66<br>(15.90-52.96) |
| Somalia                          | 37.56<br>(2.29-85.70)                                                                                                                                                 | 40.50<br>(4.80-89.76)  | 41.51<br>(3.69-89.42)  | 54.07<br>(25.16-83.32)                                                                 | 54.14<br>(25.37-84.79) | 53.37<br>(24.37-81.95) | 95.60<br>(95.10-96.06)                                                                                                            | 95.66<br>(95.08-96.19) | 95.56<br>(94.84-96.29) | 40.14<br>(12.29-68.06)                                                                     | 41.43<br>(12.69-69.63) | 42.18<br>(12.81-69.40) |
| South Sudan                      | 45.61<br>(6.52-88.35)                                                                                                                                                 | 51.00<br>(8.59-93.44)  | 50.99<br>(5.35-91.25)  | 57.36<br>(27.80-82.59)                                                                 | 58.33<br>(28.36-82.87) | 55.48<br>(21.69-79.16) | 82.55<br>(80.19-85.93)                                                                                                            | 82.51<br>(80.13-85.99) | 82.31<br>(79.90-85.46) | 40.81<br>(12.18-65.06)                                                                     | 45.05<br>(14.17-69.32) | 44.10<br>(9.08-67.43)  |
| Tanzania                         | 47.04<br>(38.08-56.77)                                                                                                                                                | 50.30<br>(37.54-63.84) | 55.30<br>(29.23-81.45) | 50.87<br>(43.91-58.89)                                                                 | 54.14<br>(44.90-63.63) | 53.90<br>(35.74-68.90) | 71.95<br>(70.06-73.67)                                                                                                            | 73.46<br>(71.65-75.30) | 71.71<br>(69.65-73.93) | 43.76<br>(36.46-51.37)                                                                     | 49.40<br>(40.28-58.61) | 50.93<br>(33.67-65.10) |
| Uganda                           | 41.64<br>(30.21-58.52)                                                                                                                                                | 36.76<br>(26.42-51.89) | 46.18<br>(24.59-75.40) | 45.25<br>(34.84-58.81)                                                                 | 40.59<br>(30.50-52.71) | 43.42<br>(25.76-61.87) | 60.28<br>(57.74-62.74)                                                                                                            | 57.37<br>(54.32-60.20) | 57.59<br>(53.98-61.54) | 39.42<br>(28.36-52.21)                                                                     | 30.25<br>(18.68-42.40) | 34.54<br>(15.00-53.97) |
| Zambia                           | 46.96<br>(36.65-58.29)                                                                                                                                                | 32.89<br>(23.63-42.89) | 35.38<br>(18.44-54.61) | 47.24<br>(34.82-58.78)                                                                 | 36.65<br>(28.01-47.82) | 32.70<br>(17.49-49.12) | 78.10<br>(76.61-79.52)                                                                                                            | 79.46<br>(77.98-80.80) | 79.09<br>(77.15-81.42) | 39.81<br>(26.23-50.75)                                                                     | 32.85<br>(23.62-42.29) | 32.76<br>(17.76-48.74) |
| Angola                           | 33.88<br>(1.77-82.97)                                                                                                                                                 | 39.36<br>(3.57-85.24)  | 42.28<br>(0.45-78.35)  | 40.24<br>(9.07-74.81)                                                                  | 45.69<br>(11.67-75.25) | 45.49<br>(5.12-69.82)  | 77.85<br>(71.33-86.76)                                                                                                            | 79.21<br>(72.59-88.18) | 75.46<br>(68.67-85.22) | 28.18<br>(1.13-57.17)                                                                      | 35.19<br>(6.03-61.52)  | 37.07<br>(2.53-59.35)  |
| Central African Republic         | 27.61<br>(17.78-37.85)                                                                                                                                                | 26.59<br>(8.01-52.62)  | 26.32<br>(5.00-56.29)  | 37.88<br>(24.31-50.13)                                                                 | 36.26<br>(14.01-59.82) | 34.84<br>(10.89-61.44) | 79.36<br>(77.36-81.62)                                                                                                            | 83.74<br>(81.83-85.84) | 85.39<br>(81.84-89.32) | 22.04<br>(9.20-36.81)                                                                      | 22.25<br>(3.05-46.83)  | 23.19<br>(0.73-47.63)  |
| Congo                            | 25.17<br>(13.86-37.40)                                                                                                                                                | 28.51<br>(18.60-38.91) | 38.53<br>(18.25-60.92) | 38.36<br>(25.81-52.02)                                                                 | 41.46<br>(29.88-53.61) | 48.93<br>(30.32-65.29) | 76.65<br>(74.68-78.56)                                                                                                            | 81.21<br>(79.52-82.82) | 78.96<br>(75.43-83.45) | 30.01<br>(18.52-41.79)                                                                     | 33.97<br>(24.04-44.99) | 43.56<br>(26.94-57.64) |
| Democratic Republic of the Congo | 48.70<br>(32.29-66.43)                                                                                                                                                | 49.40<br>(39.28-60.71) | 47.37<br>(30.38-67.68) | 55.51<br>(40.29-69.67)                                                                 | 55.59<br>(42.71-65.69) | 53.30<br>(37.19-68.33) | 83.64<br>(78.51-89.98)                                                                                                            | 87.01<br>(82.35-92.25) | 87.16<br>(82.27-92.58) | 46.81<br>(33.94-59.29)                                                                     | 48.25<br>(36.81-57.56) | 49.52<br>(35.57-62.84) |
| Equatorial Guinea                | 27.63<br>(0.00-79.14)                                                                                                                                                 | 41.04<br>(1.71-79.84)  | 51.29<br>(3.80-76.39)  | 34.78<br>(2.20-70.41)                                                                  | 43.79<br>(8.72-71.72)  | 47.27<br>(6.76-68.54)  | 79.05<br>(75.25-83.42)                                                                                                            | 74.02<br>(70.52-78.28) | 63.71<br>(59.28-70.35) | 26.19<br>(0.00-55.65)                                                                      | 32.93<br>(1.98-59.97)  | 40.43<br>(5.85-62.51)  |

**Appendix Table 1a. Scaled values for each SDG health-related indicator and three summary indicators by country for 1990, 2000, and 2015**

| Location | Indicator 3.4.1: Death rate due to cardiovascular disease, cancer, diabetes, and chronic respiratory disease among populations aged 30 to 70 (per 100,000 population) |                        |                        | Indicator 3.4.2: Age-standardised death rate due to self-harm (per 100,000 population) |                        |                        | Indicator 3.5.2: Risk-weighted prevalence of alcohol consumption, as measured by the summary exposure value (SEV) for alcohol use |                        |                        | Indicator 3.6.1: Age-standardised death rate due to road injuries (per 100,000 population) |                        |                        |
|----------|-----------------------------------------------------------------------------------------------------------------------------------------------------------------------|------------------------|------------------------|----------------------------------------------------------------------------------------|------------------------|------------------------|-----------------------------------------------------------------------------------------------------------------------------------|------------------------|------------------------|--------------------------------------------------------------------------------------------|------------------------|------------------------|
|          | 1990                                                                                                                                                                  | 2000                   | 2015                   | 1990                                                                                   | 2000                   | 2015                   | 1990                                                                                                                              | 2000                   | 2015                   | 1990                                                                                       | 2000                   | 2015                   |
| Gabon    | 35.77<br>(26.63-45.22)                                                                                                                                                | 37.70<br>(28.07-46.91) | 48.59<br>(26.53-67.95) | 39.96<br>(29.86-51.29)                                                                 | 44.44<br>(32.89-55.94) | 47.61<br>(26.65-63.33) | 69.07<br>(62.59-79.45)                                                                                                            | 70.38<br>(64.11-80.20) | 69.83<br>(63.26-80.23) | 27.45<br>(15.68-39.84)                                                                     | 35.06<br>(22.74-46.53) | 42.41<br>(24.45-58.53) |

**Appendix Table 1a. Scaled values for each SDG health-related indicator and three summary indicators by country for 1990, 2000, and 2015**

| Location      | Indicator 3.7.1: Proportion of women of reproductive age (15 to 49 years) who have their need for family planning satisfied with modern methods |                         |                         | Indicator 3.7.2: Birth rates for women aged 10 to 14 years and women aged 15 to 19 years (number of live births per 1,000 women) |                        |                           | Indicator 3.8.1: Coverage of 7 UHC tracer interventions for prevention and treatment services |                        |                        | Indicator 3.9.1: Age-standardised death rate attributable to household air pollution and ambient air pollution (per 100,000 population) |                        |                         |
|---------------|-------------------------------------------------------------------------------------------------------------------------------------------------|-------------------------|-------------------------|----------------------------------------------------------------------------------------------------------------------------------|------------------------|---------------------------|-----------------------------------------------------------------------------------------------|------------------------|------------------------|-----------------------------------------------------------------------------------------------------------------------------------------|------------------------|-------------------------|
|               | 1990                                                                                                                                            | 2000                    | 2015                    | 1990                                                                                                                             | 2000                   | 2015                      | 1990                                                                                          | 2000                   | 2015                   | 1990                                                                                                                                    | 2000                   | 2015                    |
| Canada        | 91.53<br>(88.73-93.93)                                                                                                                          | 91.85<br>(89.15-94.27)  | 95.60<br>(93.78-96.97)  | 64.71<br>(64.71-64.71)                                                                                                           | 71.99<br>(71.99-71.99) | 80.89<br>(80.89-80.89)    | 61.52<br>(60.12-62.59)                                                                        | 88.32<br>(86.54-90.15) | 96.40<br>(95.25-97.68) | 82.19<br>(78.60-84.79)                                                                                                                  | 86.63<br>(82.93-89.10) | 93.58<br>(89.50-96.17)  |
| United States | 99.23<br>(98.63-99.73)                                                                                                                          | 99.75<br>(99.36-100.00) | 99.94<br>(99.69-100.00) | 46.51<br>(46.51-46.51)                                                                                                           | 51.34<br>(51.34-51.34) | 67.79<br>(67.79-67.79)    | 63.51<br>(62.84-64.29)                                                                        | 91.20<br>(89.53-92.98) | 98.24<br>(97.12-99.45) | 74.17<br>(70.34-77.18)                                                                                                                  | 77.35<br>(73.41-80.20) | 85.73<br>(81.69-88.59)  |
| Australia     | 90.44<br>(87.03-92.98)                                                                                                                          | 94.79<br>(92.88-96.40)  | 97.46<br>(96.27-98.38)  | 66.82<br>(66.82-66.82)                                                                                                           | 71.12<br>(71.12-71.12) | 75.51<br>(75.51-75.51)    | 60.24<br>(59.25-61.28)                                                                        | 85.25<br>(83.31-87.38) | 96.28<br>(95.48-97.13) | 84.04<br>(80.76-86.29)                                                                                                                  | 90.25<br>(86.86-91.97) | 99.15<br>(95.77-100.00) |
| New Zealand   | 83.51<br>(78.79-87.71)                                                                                                                          | 91.08<br>(87.91-93.72)  | 95.17<br>(93.32-96.67)  | 58.27<br>(58.27-58.27)                                                                                                           | 62.89<br>(62.89-62.89) | 65.62<br>(65.62-65.62)    | 57.98<br>(56.99-59.01)                                                                        | 85.45<br>(83.90-87.24) | 95.40<br>(94.51-96.36) | 84.05<br>(80.78-86.76)                                                                                                                  | 89.85<br>(86.68-91.86) | 99.17<br>(95.72-100.00) |
| Brunei        | 77.39<br>(71.09-83.01)                                                                                                                          | 80.92<br>(75.77-85.62)  | 89.05<br>(85.45-92.07)  | 50.13<br>(50.13-50.13)                                                                                                           | 62.65<br>(62.65-62.65) | 67.04<br>(67.04-67.04)    | 62.02<br>(61.15-62.91)                                                                        | 84.91<br>(79.99-87.20) | 95.77<br>(94.53-97.01) | 86.00<br>(80.71-91.33)                                                                                                                  | 90.42<br>(84.62-96.27) | 95.94<br>(89.73-100.00) |
| Japan         | 59.76<br>(51.71-67.77)                                                                                                                          | 66.83<br>(59.04-73.99)  | 79.45<br>(73.71-84.28)  | 86.93<br>(86.93-86.93)                                                                                                           | 86.10<br>(86.10-86.10) | 89.55<br>(89.55-89.55)    | 57.77<br>(56.40-59.03)                                                                        | 86.47<br>(84.83-88.19) | 95.64<br>(94.52-96.74) | 80.70<br>(76.36-84.60)                                                                                                                  | 85.78<br>(81.24-90.10) | 88.80<br>(84.05-93.47)  |
| Singapore     | 62.16<br>(53.92-69.39)                                                                                                                          | 72.27<br>(65.71-78.03)  | 86.58<br>(82.48-90.08)  | 78.86<br>(78.86-78.86)                                                                                                           | 81.42<br>(81.42-81.42) | 92.48<br>(92.48-92.48)    | 58.91<br>(57.72-60.01)                                                                        | 88.20<br>(86.23-90.05) | 97.05<br>(95.91-98.14) | 62.97<br>(57.42-68.56)                                                                                                                  | 69.29<br>(63.11-75.22) | 77.27<br>(70.40-83.78)  |
| South Korea   | 76.44<br>(69.91-82.10)                                                                                                                          | 85.87<br>(81.66-89.48)  | 93.54<br>(91.22-95.52)  | 79.67<br>(79.67-79.67)                                                                                                           | 92.88<br>(92.88-92.88) | 100.00<br>(100.00-100.00) | 58.19<br>(56.74-59.52)                                                                        | 75.72<br>(64.23-81.33) | 95.21<br>(93.75-96.39) | 61.55<br>(57.87-65.22)                                                                                                                  | 72.32<br>(68.20-76.04) | 80.04<br>(75.76-84.22)  |
| Andorra       | 85.57<br>(80.85-89.26)                                                                                                                          | 90.19<br>(87.01-92.86)  | 95.07<br>(93.11-96.59)  | 69.03<br>(69.03-69.03)                                                                                                           | 72.88<br>(72.88-72.88) | 72.78<br>(72.78-72.78)    | 61.26<br>(60.21-62.32)                                                                        | 85.18<br>(81.87-88.44) | 96.26<br>(94.28-98.76) | 86.29<br>(81.50-90.87)                                                                                                                  | 89.94<br>(85.19-94.64) | 93.02<br>(87.96-97.72)  |
| Austria       | 65.77<br>(58.29-72.56)                                                                                                                          | 80.32<br>(74.47-85.27)  | 91.58<br>(88.67-93.98)  | 65.24<br>(65.24-65.24)                                                                                                           | 72.75<br>(72.75-72.75) | 83.85<br>(83.85-83.85)    | 56.18<br>(54.81-57.51)                                                                        | 83.36<br>(81.43-85.06) | 93.38<br>(91.65-94.76) | 70.98<br>(67.34-74.08)                                                                                                                  | 75.64<br>(71.98-78.51) | 83.22<br>(79.16-86.27)  |
| Belgium       | 84.84<br>(80.35-88.97)                                                                                                                          | 88.96<br>(85.20-92.10)  | 94.65<br>(92.57-96.27)  | 74.16<br>(74.16-74.16)                                                                                                           | 77.08<br>(77.08-77.08) | 81.34<br>(81.34-81.34)    | 60.16<br>(58.96-61.21)                                                                        | 87.11<br>(85.48-88.73) | 97.42<br>(96.47-98.40) | 69.51<br>(65.76-72.62)                                                                                                                  | 74.09<br>(70.30-77.22) | 81.74<br>(77.61-85.34)  |

**Appendix Table 1a. Scaled values for each SDG health-related indicator and three summary indicators by country for 1990, 2000, and 2015**

| Location   | Indicator 3.7.1: Proportion of women of reproductive age (15 to 49 years) who have their need for family planning satisfied with modern methods |                        |                        | Indicator 3.7.2: Birth rates for women aged 10 to 14 years and women aged 15 to 19 years (number of live births per 1,000 women) |                        |                        | Indicator 3.8.1: Coverage of 7 UHC tracer interventions for prevention and treatment services |                        |                        | Indicator 3.9.1: Age-standardised death rate attributable to household air pollution and ambient air pollution (per 100,000 population) |                        |                        |
|------------|-------------------------------------------------------------------------------------------------------------------------------------------------|------------------------|------------------------|----------------------------------------------------------------------------------------------------------------------------------|------------------------|------------------------|-----------------------------------------------------------------------------------------------|------------------------|------------------------|-----------------------------------------------------------------------------------------------------------------------------------------|------------------------|------------------------|
|            | 1990                                                                                                                                            | 2000                   | 2015                   | 1990                                                                                                                             | 2000                   | 2015                   | 1990                                                                                          | 2000                   | 2015                   | 1990                                                                                                                                    | 2000                   | 2015                   |
| Cyprus     | 75.84<br>(69.25-81.87)                                                                                                                          | 83.99<br>(79.39-88.20) | 92.51<br>(89.81-94.79) | 58.15<br>(58.15-58.15)                                                                                                           | 74.34<br>(74.34-74.34) | 91.63<br>(91.63-91.63) | 58.33<br>(56.96-59.56)                                                                        | 82.63<br>(80.57-84.84) | 95.64<br>(94.09-97.91) | 68.87<br>(64.98-72.04)                                                                                                                  | 74.15<br>(70.43-77.31) | 84.25<br>(80.18-87.95) |
| Denmark    | 73.37<br>(66.74-79.63)                                                                                                                          | 83.14<br>(78.23-87.52) | 90.18<br>(87.09-93.02) | 76.92<br>(76.92-76.92)                                                                                                           | 82.27<br>(82.27-82.27) | 89.44<br>(89.44-89.44) | 60.04<br>(58.93-61.11)                                                                        | 81.13<br>(79.10-83.63) | 95.11<br>(93.96-96.20) | 70.84<br>(67.18-73.78)                                                                                                                  | 77.40<br>(73.53-80.38) | 84.19<br>(80.06-87.40) |
| Finland    | 90.09<br>(86.68-92.86)                                                                                                                          | 94.08<br>(91.82-95.86) | 96.97<br>(95.57-98.14) | 74.11<br>(74.11-74.11)                                                                                                           | 77.10<br>(77.10-77.10) | 82.83<br>(82.83-82.83) | 62.46<br>(61.55-63.34)                                                                        | 88.06<br>(86.57-89.64) | 97.97<br>(97.12-98.83) | 76.59<br>(73.03-79.69)                                                                                                                  | 84.69<br>(81.20-87.28) | 92.03<br>(88.17-94.49) |
| France     | 81.79<br>(76.90-85.91)                                                                                                                          | 87.80<br>(84.49-90.87) | 93.81<br>(91.42-95.69) | 72.72<br>(72.72-72.72)                                                                                                           | 77.14<br>(77.14-77.14) | 79.86<br>(79.86-79.86) | 57.99<br>(56.60-59.19)                                                                        | 86.38<br>(84.61-88.25) | 95.73<br>(94.56-96.81) | 80.95<br>(77.05-83.92)                                                                                                                  | 84.55<br>(80.51-87.63) | 90.73<br>(86.17-94.47) |
| Germany    | 74.69<br>(68.18-80.33)                                                                                                                          | 84.57<br>(80.04-88.57) | 92.16<br>(89.45-94.40) | 70.07<br>(70.07-70.07)                                                                                                           | 75.10<br>(75.10-75.10) | 85.69<br>(85.69-85.69) | 56.87<br>(55.43-58.18)                                                                        | 86.74<br>(84.84-88.51) | 95.78<br>(94.74-96.76) | 68.85<br>(65.17-71.70)                                                                                                                  | 76.14<br>(72.46-78.91) | 83.27<br>(79.09-86.16) |
| Greece     | 46.30<br>(37.22-54.96)                                                                                                                          | 53.60<br>(45.26-61.89) | 73.54<br>(67.09-79.45) | 65.04<br>(65.04-65.04)                                                                                                           | 77.52<br>(77.52-77.52) | 85.57<br>(85.57-85.57) | 55.27<br>(53.47-56.76)                                                                        | 82.75<br>(80.43-85.00) | 93.78<br>(92.37-95.03) | 73.17<br>(69.53-76.30)                                                                                                                  | 76.14<br>(72.52-79.23) | 79.55<br>(75.64-82.58) |
| Iceland    | 84.73<br>(80.08-88.79)                                                                                                                          | 89.54<br>(85.98-92.38) | 94.69<br>(92.78-96.30) | 60.26<br>(60.26-60.26)                                                                                                           | 67.24<br>(67.24-67.24) | 84.34<br>(84.34-84.34) | 62.48<br>(61.38-63.41)                                                                        | 78.92<br>(75.77-81.89) | 89.17<br>(87.51-90.89) | 80.66<br>(76.44-83.99)                                                                                                                  | 86.66<br>(82.49-89.63) | 93.84<br>(89.69-96.85) |
| Ireland    | 78.98<br>(73.44-83.75)                                                                                                                          | 86.80<br>(82.68-90.24) | 94.75<br>(92.81-96.49) | 72.82<br>(72.82-72.82)                                                                                                           | 70.33<br>(70.33-70.33) | 81.01<br>(81.01-81.01) | 54.44<br>(52.81-55.93)                                                                        | 80.47<br>(78.51-82.33) | 96.32<br>(95.29-97.40) | 73.14<br>(69.31-76.49)                                                                                                                  | 78.26<br>(74.23-81.38) | 86.34<br>(82.52-89.62) |
| Israel     | 87.00<br>(82.97-90.49)                                                                                                                          | 90.34<br>(87.12-93.18) | 95.11<br>(93.28-96.68) | 61.53<br>(61.53-61.53)                                                                                                           | 66.11<br>(66.11-66.11) | 72.94<br>(72.94-72.94) | 61.34<br>(60.37-62.30)                                                                        | 80.13<br>(77.76-82.47) | 96.57<br>(95.66-97.49) | 70.57<br>(66.87-73.70)                                                                                                                  | 78.24<br>(74.39-81.46) | 83.56<br>(79.14-87.18) |
| Italy      | 67.79<br>(60.09-74.97)                                                                                                                          | 75.29<br>(69.07-80.87) | 86.41<br>(82.08-89.87) | 79.05<br>(79.05-79.05)                                                                                                           | 84.73<br>(84.73-84.73) | 87.44<br>(87.44-87.44) | 56.52<br>(54.76-58.32)                                                                        | 87.03<br>(85.38-88.69) | 96.90<br>(95.84-97.92) | 74.28<br>(70.46-77.59)                                                                                                                  | 80.08<br>(76.13-83.41) | 83.38<br>(78.91-86.94) |
| Luxembourg | 81.06<br>(75.98-85.58)                                                                                                                          | 87.83<br>(83.79-91.12) | 94.23<br>(92.27-95.99) | 73.84<br>(73.84-73.84)                                                                                                           | 76.04<br>(76.04-76.04) | 85.37<br>(85.37-85.37) | 59.58<br>(58.57-60.68)                                                                        | 80.28<br>(77.34-83.22) | 91.25<br>(89.78-92.79) | 68.46<br>(64.94-71.57)                                                                                                                  | 76.03<br>(71.96-79.27) | 85.56<br>(81.01-89.30) |

**Appendix Table 1a. Scaled values for each SDG health-related indicator and three summary indicators by country for 1990, 2000, and 2015**

| Location       | Indicator 3.7.1: Proportion of women of reproductive age (15 to 49 years) who have their need for family planning satisfied with modern methods |                        |                        | Indicator 3.7.2: Birth rates for women aged 10 to 14 years and women aged 15 to 19 years (number of live births per 1,000 women) |                        |                        | Indicator 3.8.1: Coverage of 7 UHC tracer interventions for prevention and treatment services |                        |                           | Indicator 3.9.1: Age-standardised death rate attributable to household air pollution and ambient air pollution (per 100,000 population) |                        |                        |
|----------------|-------------------------------------------------------------------------------------------------------------------------------------------------|------------------------|------------------------|----------------------------------------------------------------------------------------------------------------------------------|------------------------|------------------------|-----------------------------------------------------------------------------------------------|------------------------|---------------------------|-----------------------------------------------------------------------------------------------------------------------------------------|------------------------|------------------------|
|                | 1990                                                                                                                                            | 2000                   | 2015                   | 1990                                                                                                                             | 2000                   | 2015                   | 1990                                                                                          | 2000                   | 2015                      | 1990                                                                                                                                    | 2000                   | 2015                   |
| Malta          | 57.45<br>(49.72-65.52)                                                                                                                          | 65.83<br>(57.59-72.88) | 82.26<br>(76.83-86.56) | 72.96<br>(72.96-72.96)                                                                                                           | 68.48<br>(68.48-68.48) | 74.93<br>(74.93-74.93) | 53.77<br>(51.68-55.66)                                                                        | 67.20<br>(63.69-70.61) | 86.88<br>(84.87-88.67)    | 72.28<br>(68.23-76.01)                                                                                                                  | 77.51<br>(73.03-81.32) | 82.70<br>(78.39-86.34) |
| Netherlands    | 82.16<br>(76.64-86.88)                                                                                                                          | 84.03<br>(79.31-88.27) | 91.91<br>(88.99-94.22) | 82.64<br>(82.64-82.64)                                                                                                           | 84.56<br>(84.56-84.56) | 89.92<br>(89.92-89.92) | 61.89<br>(60.86-62.87)                                                                        | 88.51<br>(86.83-90.11) | 97.39<br>(96.43-98.44)    | 71.01<br>(67.27-74.12)                                                                                                                  | 74.80<br>(70.90-78.08) | 83.13<br>(78.70-86.79) |
| Norway         | 94.12<br>(92.02-95.78)                                                                                                                          | 93.20<br>(90.73-95.18) | 95.45<br>(93.73-96.89) | 68.21<br>(68.21-68.21)                                                                                                           | 75.81<br>(75.81-75.81) | 83.53<br>(83.53-83.53) | 61.69<br>(60.75-62.57)                                                                        | 80.83<br>(78.75-83.25) | 96.83<br>(95.98-97.76)    | 75.66<br>(72.07-78.81)                                                                                                                  | 81.76<br>(77.97-84.45) | 89.59<br>(85.77-92.42) |
| Portugal       | 56.44<br>(48.18-64.12)                                                                                                                          | 71.87<br>(65.06-78.34) | 87.91<br>(84.23-91.09) | 63.82<br>(63.82-63.82)                                                                                                           | 68.93<br>(68.93-68.93) | 83.47<br>(83.47-83.47) | 55.25<br>(52.79-57.07)                                                                        | 84.38<br>(82.07-86.28) | 95.76<br>(94.56-96.85)    | 75.36<br>(71.48-78.90)                                                                                                                  | 79.44<br>(75.46-82.99) | 88.36<br>(84.14-92.04) |
| Spain          | 64.33<br>(56.72-71.63)                                                                                                                          | 79.07<br>(73.64-83.70) | 90.57<br>(87.28-93.20) | 77.21<br>(77.21-77.21)                                                                                                           | 82.45<br>(82.45-82.45) | 85.57<br>(85.57-85.57) | 57.60<br>(55.90-59.02)                                                                        | 86.91<br>(85.01-88.75) | 96.68<br>(95.71-97.64)    | 79.13<br>(75.34-81.98)                                                                                                                  | 82.47<br>(78.44-85.48) | 90.74<br>(86.49-94.08) |
| Sweden         | 82.46<br>(77.14-86.84)                                                                                                                          | 84.87<br>(80.09-88.80) | 91.21<br>(88.19-93.73) | 71.93<br>(71.93-71.93)                                                                                                           | 82.96<br>(82.96-82.96) | 83.74<br>(83.74-83.74) | 62.41<br>(61.42-63.31)                                                                        | 85.83<br>(83.79-88.14) | 98.79<br>(98.00-99.79)    | 85.17<br>(81.81-87.81)                                                                                                                  | 91.78<br>(88.58-93.85) | 95.55<br>(92.09-97.49) |
| Switzerland    | 85.23<br>(80.66-88.95)                                                                                                                          | 91.28<br>(88.18-93.84) | 95.49<br>(93.61-97.03) | 81.29<br>(81.29-81.29)                                                                                                           | 84.55<br>(84.55-84.55) | 92.22<br>(92.22-92.22) | 60.55<br>(59.64-61.45)                                                                        | 87.74<br>(86.26-89.22) | 97.14<br>(96.15-98.26)    | 78.21<br>(74.38-81.15)                                                                                                                  | 83.55<br>(79.77-86.37) | 89.75<br>(85.28-93.01) |
| United Kingdom | 88.05<br>(84.28-91.17)                                                                                                                          | 91.68<br>(89.00-94.00) | 95.35<br>(93.44-96.87) | 59.62<br>(59.62-59.62)                                                                                                           | 62.91<br>(62.91-62.91) | 73.08<br>(73.08-73.08) | 59.99<br>(58.57-61.19)                                                                        | 87.84<br>(86.54-89.41) | 100.00<br>(100.00-100.00) | 68.45<br>(64.68-71.69)                                                                                                                  | 74.65<br>(70.83-78.06) | 83.29<br>(79.21-86.67) |
| Argentina      | 60.14<br>(51.29-67.44)                                                                                                                          | 70.69<br>(63.82-76.94) | 85.69<br>(81.46-89.44) | 39.32<br>(39.32-39.32)                                                                                                           | 42.77<br>(42.77-42.77) | 44.64<br>(44.64-44.64) | 56.85<br>(54.91-58.24)                                                                        | 84.39<br>(82.23-86.59) | 96.91<br>(94.33-98.71)    | 66.22<br>(62.39-69.49)                                                                                                                  | 69.64<br>(65.74-73.12) | 75.45<br>(70.70-79.36) |
| Chile          | 57.85<br>(49.68-65.29)                                                                                                                          | 72.17<br>(64.79-78.75) | 86.82<br>(82.75-90.42) | 42.82<br>(42.82-42.82)                                                                                                           | 47.38<br>(47.38-47.38) | 52.21<br>(52.21-52.21) | 58.17<br>(55.93-59.80)                                                                        | 86.44<br>(83.37-88.60) | 93.75<br>(91.65-95.36)    | 59.81<br>(54.53-64.91)                                                                                                                  | 71.16<br>(66.36-75.59) | 78.89<br>(74.61-82.77) |
| Uruguay        | 53.89<br>(45.02-62.02)                                                                                                                          | 64.23<br>(56.08-71.75) | 80.19<br>(74.85-84.99) | 41.95<br>(41.95-41.95)                                                                                                           | 44.15<br>(44.15-44.15) | 48.12<br>(48.12-48.12) | 55.91<br>(54.12-57.45)                                                                        | 85.64<br>(83.91-87.24) | 94.45<br>(93.18-95.60)    | 69.48<br>(64.14-73.24)                                                                                                                  | 74.14<br>(70.42-77.34) | 80.64<br>(76.69-84.04) |

**Appendix Table 1a. Scaled values for each SDG health-related indicator and three summary indicators by country for 1990, 2000, and 2015**

| Location               | Indicator 3.7.1: Proportion of women of reproductive age (15 to 49 years) who have their need for family planning satisfied with modern methods |                        |                        | Indicator 3.7.2: Birth rates for women aged 10 to 14 years and women aged 15 to 19 years (number of live births per 1,000 women) |                        |                        | Indicator 3.8.1: Coverage of 7 UHC tracer interventions for prevention and treatment services |                        |                        | Indicator 3.9.1: Age-standardised death rate attributable to household air pollution and ambient air pollution (per 100,000 population) |                        |                        |
|------------------------|-------------------------------------------------------------------------------------------------------------------------------------------------|------------------------|------------------------|----------------------------------------------------------------------------------------------------------------------------------|------------------------|------------------------|-----------------------------------------------------------------------------------------------|------------------------|------------------------|-----------------------------------------------------------------------------------------------------------------------------------------|------------------------|------------------------|
|                        | 1990                                                                                                                                            | 2000                   | 2015                   | 1990                                                                                                                             | 2000                   | 2015                   | 1990                                                                                          | 2000                   | 2015                   | 1990                                                                                                                                    | 2000                   | 2015                   |
| Belarus                | 39.64<br>(36.30-43.13)                                                                                                                          | 54.46<br>(51.31-57.50) | 80.85<br>(78.96-82.70) | 47.72<br>(47.72-47.72)                                                                                                           | 60.39<br>(60.39-60.39) | 69.50<br>(69.50-69.50) | 56.04<br>(55.05-57.14)                                                                        | 59.84<br>(59.15-60.71) | 93.72<br>(92.49-94.92) | 44.15<br>(37.75-49.84)                                                                                                                  | 47.78<br>(42.67-52.38) | 57.09<br>(52.89-60.88) |
| Estonia                | 54.33<br>(51.27-57.52)                                                                                                                          | 60.05<br>(57.12-63.16) | 79.44<br>(77.47-81.49) | 47.29<br>(47.29-47.29)                                                                                                           | 62.88<br>(62.88-62.88) | 78.83<br>(78.83-78.83) | 55.69<br>(54.57-56.83)                                                                        | 84.75<br>(83.95-85.61) | 92.96<br>(91.85-94.03) | 49.96<br>(42.25-57.03)                                                                                                                  | 57.99<br>(51.27-63.53) | 77.24<br>(71.58-81.75) |
| Latvia                 | 40.62<br>(37.30-43.94)                                                                                                                          | 51.56<br>(48.28-54.83) | 75.74<br>(73.47-77.90) | 48.24<br>(48.24-48.24)                                                                                                           | 68.31<br>(68.31-68.31) | 79.13<br>(79.13-79.13) | 53.75<br>(52.84-54.72)                                                                        | 61.13<br>(57.46-65.17) | 89.79<br>(88.62-91.10) | 44.95<br>(38.46-50.75)                                                                                                                  | 53.66<br>(48.83-57.96) | 65.08<br>(60.17-68.93) |
| Lithuania              | 33.09<br>(29.59-36.32)                                                                                                                          | 46.67<br>(43.27-50.00) | 70.14<br>(67.55-72.68) | 50.60<br>(50.60-50.60)                                                                                                           | 62.84<br>(62.84-62.84) | 82.51<br>(82.51-82.51) | 54.40<br>(53.42-55.40)                                                                        | 58.25<br>(57.41-59.14) | 89.64<br>(88.38-90.94) | 48.01<br>(41.89-53.37)                                                                                                                  | 56.74<br>(50.57-61.29) | 66.49<br>(62.20-70.10) |
| Moldova                | 55.75<br>(52.40-58.80)                                                                                                                          | 54.23<br>(51.40-56.88) | 71.96<br>(69.56-74.27) | 40.56<br>(40.56-40.56)                                                                                                           | 52.98<br>(52.98-52.98) | 66.11<br>(66.11-66.11) | 57.64<br>(56.62-58.61)                                                                        | 56.17<br>(55.45-57.06) | 81.80<br>(80.01-83.75) | 34.20<br>(28.41-40.90)                                                                                                                  | 39.30<br>(34.67-44.11) | 59.61<br>(55.39-63.30) |
| Russia                 | 47.58<br>(44.31-50.70)                                                                                                                          | 53.86<br>(50.89-56.91) | 75.43<br>(73.15-77.47) | 44.66<br>(44.66-44.66)                                                                                                           | 59.36<br>(59.36-59.36) | 66.64<br>(66.64-66.64) | 49.11<br>(46.41-51.24)                                                                        | 56.27<br>(55.24-57.33) | 84.79<br>(82.43-87.38) | 49.50<br>(42.88-54.50)                                                                                                                  | 48.45<br>(43.58-52.98) | 61.97<br>(57.93-65.49) |
| Ukraine                | 45.13<br>(41.90-48.31)                                                                                                                          | 54.87<br>(51.91-57.99) | 75.97<br>(73.85-77.94) | 42.70<br>(42.70-42.70)                                                                                                           | 57.21<br>(57.21-57.21) | 66.14<br>(66.14-66.14) | 50.46<br>(46.70-53.47)                                                                        | 55.24<br>(53.77-56.59) | 81.98<br>(78.41-84.93) | 43.58<br>(37.21-49.23)                                                                                                                  | 46.65<br>(42.25-50.95) | 57.43<br>(53.44-60.92) |
| Albania                | 3.95<br>(0.00-10.42)                                                                                                                            | 5.25<br>(0.34-11.37)   | 9.80<br>(3.40-17.39)   | 60.65<br>(60.65-60.65)                                                                                                           | 62.80<br>(62.80-62.80) | 62.91<br>(62.91-62.91) | 39.76<br>(36.77-42.90)                                                                        | 59.33<br>(53.60-63.23) | 76.98<br>(73.72-80.80) | 42.40<br>(38.76-46.19)                                                                                                                  | 48.33<br>(44.94-52.20) | 63.93<br>(59.37-68.31) |
| Bosnia and Herzegovina | 12.58<br>(4.79-21.61)                                                                                                                           | 15.69<br>(7.82-24.98)  | 24.06<br>(17.31-31.28) | 57.51<br>(57.51-57.51)                                                                                                           | 63.95<br>(63.95-63.95) | 82.87<br>(82.87-82.87) | 43.39<br>(40.48-46.13)                                                                        | 65.52<br>(54.16-69.20) | 80.95<br>(78.32-83.97) | 39.41<br>(35.83-43.09)                                                                                                                  | 47.11<br>(43.93-50.79) | 57.61<br>(53.80-61.40) |
| Bulgaria               | 30.75<br>(20.61-42.29)                                                                                                                          | 36.61<br>(24.77-48.87) | 59.22<br>(46.62-70.13) | 38.48<br>(38.48-38.48)                                                                                                           | 54.25<br>(54.25-54.25) | 59.59<br>(59.59-59.59) | 55.57<br>(53.68-57.40)                                                                        | 55.67<br>(53.79-57.44) | 81.33<br>(79.21-83.38) | 41.49<br>(37.21-45.59)                                                                                                                  | 48.02<br>(44.08-51.85) | 58.37<br>(54.70-61.87) |
| Croatia                | 17.37<br>(8.72-27.28)                                                                                                                           | 20.35<br>(11.39-30.40) | 33.55<br>(21.91-46.27) | 60.19<br>(60.19-60.19)                                                                                                           | 68.06<br>(68.06-68.06) | 80.44<br>(80.44-80.44) | 52.52<br>(50.24-54.71)                                                                        | 70.33<br>(65.62-74.57) | 84.08<br>(80.98-87.00) | 49.97<br>(45.56-54.22)                                                                                                                  | 57.07<br>(53.45-60.45) | 67.81<br>(63.93-70.91) |

**Appendix Table 1a. Scaled values for each SDG health-related indicator and three summary indicators by country for 1990, 2000, and 2015**

| Location       | Indicator 3.7.1: Proportion of women of reproductive age (15 to 49 years) who have their need for family planning satisfied with modern methods |                        |                        | Indicator 3.7.2: Birth rates for women aged 10 to 14 years and women aged 15 to 19 years (number of live births per 1,000 women) |                        |                        | Indicator 3.8.1: Coverage of 7 UHC tracer interventions for prevention and treatment services |                        |                        | Indicator 3.9.1: Age-standardised death rate attributable to household air pollution and ambient air pollution (per 100,000 population) |                        |                        |
|----------------|-------------------------------------------------------------------------------------------------------------------------------------------------|------------------------|------------------------|----------------------------------------------------------------------------------------------------------------------------------|------------------------|------------------------|-----------------------------------------------------------------------------------------------|------------------------|------------------------|-----------------------------------------------------------------------------------------------------------------------------------------|------------------------|------------------------|
|                | 1990                                                                                                                                            | 2000                   | 2015                   | 1990                                                                                                                             | 2000                   | 2015                   | 1990                                                                                          | 2000                   | 2015                   | 1990                                                                                                                                    | 2000                   | 2015                   |
| Czech Republic | 52.78<br>(40.49-64.81)                                                                                                                          | 63.09<br>(50.44-73.59) | 79.41<br>(71.05-86.77) | 47.57<br>(47.57-47.57)                                                                                                           | 73.36<br>(73.36-73.36) | 82.32<br>(82.32-82.32) | 60.09<br>(58.45-61.58)                                                                        | 86.38<br>(84.04-88.64) | 96.23<br>(94.93-97.48) | 49.82<br>(46.20-53.38)                                                                                                                  | 62.21<br>(58.69-65.26) | 71.12<br>(67.38-74.02) |
| Hungary        | 49.54<br>(36.81-61.86)                                                                                                                          | 57.67<br>(44.43-69.25) | 77.63<br>(68.30-85.10) | 50.99<br>(50.99-50.99)                                                                                                           | 66.18<br>(66.18-66.18) | 75.10<br>(75.10-75.10) | 59.44<br>(57.87-61.07)                                                                        | 75.68<br>(71.12-80.44) | 96.78<br>(95.37-98.09) | 45.51<br>(41.30-49.67)                                                                                                                  | 53.98<br>(49.89-57.77) | 65.76<br>(62.10-69.15) |
| Macedonia      | 6.55<br>(0.62-13.78)                                                                                                                            | 8.90<br>(2.56-17.43)   | 17.22<br>(8.62-26.44)  | 47.63<br>(47.63-47.63)                                                                                                           | 58.90<br>(58.90-58.90) | 70.95<br>(70.95-70.95) | 47.31<br>(44.48-50.12)                                                                        | 64.88<br>(53.57-69.49) | 80.37<br>(76.94-84.24) | 40.47<br>(36.51-44.72)                                                                                                                  | 43.75<br>(39.84-47.67) | 55.67<br>(52.04-59.58) |
| Montenegro     | 16.71<br>(8.23-28.02)                                                                                                                           | 20.48<br>(11.69-31.11) | 30.80<br>(19.16-42.43) | 57.26<br>(57.26-57.26)                                                                                                           | 64.53<br>(64.53-64.53) | 75.08<br>(75.08-75.08) | 49.16<br>(45.83-51.86)                                                                        | 67.35<br>(61.20-71.30) | 82.08<br>(78.60-85.87) | 47.01<br>(43.00-51.24)                                                                                                                  | 48.74<br>(44.65-53.12) | 56.34<br>(52.63-60.05) |
| Poland         | 16.59<br>(7.77-26.71)                                                                                                                           | 21.47<br>(12.15-32.36) | 40.90<br>(28.30-54.01) | 53.37<br>(53.37-53.37)                                                                                                           | 68.91<br>(68.91-68.91) | 77.59<br>(77.59-77.59) | 53.91<br>(51.56-56.11)                                                                        | 80.99<br>(77.90-84.00) | 91.12<br>(88.61-93.57) | 44.78<br>(40.25-49.04)                                                                                                                  | 56.41<br>(52.63-60.17) | 67.45<br>(63.66-70.56) |
| Romania        | 16.30<br>(7.71-26.61)                                                                                                                           | 22.35<br>(12.78-33.22) | 41.06<br>(28.72-53.32) | 44.92<br>(44.92-44.92)                                                                                                           | 55.57<br>(55.57-55.57) | 60.45<br>(60.45-60.45) | 48.04<br>(45.74-50.24)                                                                        | 65.65<br>(61.40-69.38) | 87.97<br>(85.17-90.53) | 40.81<br>(36.57-45.04)                                                                                                                  | 46.70<br>(43.61-50.10) | 59.99<br>(56.04-63.66) |
| Serbia         | 16.11<br>(7.09-25.80)                                                                                                                           | 21.42<br>(11.70-32.72) | 36.86<br>(25.31-48.82) | 50.76<br>(50.76-50.76)                                                                                                           | 58.55<br>(58.55-58.55) | 70.31<br>(70.31-70.31) | 50.04<br>(47.08-52.62)                                                                        | 53.29<br>(50.90-55.58) | 83.55<br>(80.12-86.91) | 43.89<br>(40.58-47.69)                                                                                                                  | 43.68<br>(39.67-47.74) | 57.72<br>(54.54-60.90) |
| Slovakia       | 48.35<br>(36.36-60.50)                                                                                                                          | 59.66<br>(47.26-70.49) | 79.45<br>(70.44-86.53) | 45.63<br>(45.63-45.63)                                                                                                           | 64.61<br>(64.61-64.61) | 72.56<br>(72.56-72.56) | 59.81<br>(58.12-61.27)                                                                        | 81.10<br>(77.56-84.14) | 96.45<br>(94.97-97.72) | 46.48<br>(42.67-50.24)                                                                                                                  | 57.20<br>(53.71-60.49) | 68.86<br>(65.17-71.91) |
| Slovenia       | 39.12<br>(30.77-47.95)                                                                                                                          | 51.09<br>(39.81-60.95) | 70.73<br>(59.62-80.17) | 60.18<br>(60.18-60.18)                                                                                                           | 80.36<br>(80.36-80.36) | 88.91<br>(88.91-88.91) | 57.06<br>(55.65-58.50)                                                                        | 83.18<br>(80.81-85.54) | 94.51<br>(92.62-96.18) | 57.50<br>(53.07-61.52)                                                                                                                  | 66.97<br>(63.45-70.17) | 78.22<br>(74.31-81.75) |
| Armenia        | 23.31<br>(17.27-30.06)                                                                                                                          | 23.48<br>(18.94-28.49) | 37.30<br>(30.58-43.44) | 35.72<br>(35.72-35.72)                                                                                                           | 51.50<br>(51.50-51.50) | 62.86<br>(62.86-62.86) | 49.96<br>(48.03-51.91)                                                                        | 51.45<br>(50.24-52.73) | 85.26<br>(83.69-86.85) | 39.81<br>(33.79-47.06)                                                                                                                  | 47.60<br>(42.56-52.27) | 62.23<br>(57.49-66.32) |
| Azerbaijan     | 11.13<br>(6.37-16.15)                                                                                                                           | 12.37<br>(7.70-17.39)  | 24.68<br>(18.03-31.31) | 49.89<br>(49.89-49.89)                                                                                                           | 52.08<br>(52.08-52.08) | 41.59<br>(41.59-41.59) | 30.29<br>(26.82-33.42)                                                                        | 32.26<br>(30.80-33.91) | 78.75<br>(75.90-81.25) | 28.45<br>(21.58-35.60)                                                                                                                  | 37.39<br>(31.87-42.92) | 53.90<br>(48.12-58.57) |

**Appendix Table 1a. Scaled values for each SDG health-related indicator and three summary indicators by country for 1990, 2000, and 2015**

| Location     | Indicator 3.7.1: Proportion of women of reproductive age (15 to 49 years) who have their need for family planning satisfied with modern methods |                        |                        | Indicator 3.7.2: Birth rates for women aged 10 to 14 years and women aged 15 to 19 years (number of live births per 1,000 women) |                        |                        | Indicator 3.8.1: Coverage of 7 UHC tracer interventions for prevention and treatment services |                        |                        | Indicator 3.9.1: Age-standardised death rate attributable to household air pollution and ambient air pollution (per 100,000 population) |                        |                        |
|--------------|-------------------------------------------------------------------------------------------------------------------------------------------------|------------------------|------------------------|----------------------------------------------------------------------------------------------------------------------------------|------------------------|------------------------|-----------------------------------------------------------------------------------------------|------------------------|------------------------|-----------------------------------------------------------------------------------------------------------------------------------------|------------------------|------------------------|
|              | 1990                                                                                                                                            | 2000                   | 2015                   | 1990                                                                                                                             | 2000                   | 2015                   | 1990                                                                                          | 2000                   | 2015                   | 1990                                                                                                                                    | 2000                   | 2015                   |
| Georgia      | 36.04<br>(29.25-42.75)                                                                                                                          | 39.44<br>(32.41-46.89) | 55.58<br>(47.86-62.89) | 38.50<br>(38.50-38.50)                                                                                                           | 48.05<br>(48.05-48.05) | 54.29<br>(54.29-54.29) | 40.18<br>(37.41-42.69)                                                                        | 47.56<br>(46.26-49.03) | 86.31<br>(82.63-88.97) | 37.42<br>(31.19-44.78)                                                                                                                  | 41.58<br>(36.22-47.93) | 51.77<br>(44.90-57.77) |
| Kazakhstan   | 55.65<br>(49.19-62.11)                                                                                                                          | 63.96<br>(58.95-68.71) | 75.98<br>(70.15-80.94) | 43.03<br>(43.03-43.03)                                                                                                           | 54.93<br>(54.93-54.93) | 57.69<br>(57.69-57.69) | 52.04<br>(49.44-54.56)                                                                        | 59.85<br>(58.94-60.89) | 91.83<br>(90.10-93.29) | 40.42<br>(33.02-47.92)                                                                                                                  | 40.37<br>(34.65-46.10) | 54.01<br>(48.66-58.97) |
| Kyrgyzstan   | 59.03<br>(52.22-65.10)                                                                                                                          | 60.90<br>(55.30-66.25) | 61.27<br>(55.27-66.85) | 37.79<br>(37.79-37.79)                                                                                                           | 48.44<br>(48.44-48.44) | 49.41<br>(49.41-49.41) | 52.46<br>(50.90-53.87)                                                                        | 55.61<br>(54.53-56.74) | 87.76<br>(85.63-89.53) | 31.55<br>(24.58-39.82)                                                                                                                  | 34.11<br>(27.36-41.70) | 45.63<br>(40.23-51.13) |
| Mongolia     | 42.01<br>(34.17-49.20)                                                                                                                          | 60.04<br>(53.07-67.04) | 75.72<br>(69.95-80.79) | 47.73<br>(47.73-47.73)                                                                                                           | 59.40<br>(59.40-59.40) | 65.50<br>(65.50-65.50) | 42.77<br>(40.42-44.70)                                                                        | 59.58<br>(55.94-62.96) | 87.29<br>(85.13-89.43) | 30.82<br>(25.88-36.90)                                                                                                                  | 27.54<br>(22.50-32.88) | 40.51<br>(34.59-46.27) |
| Tajikistan   | 34.09<br>(27.24-41.38)                                                                                                                          | 37.23<br>(30.24-44.53) | 47.57<br>(41.28-53.77) | 37.47<br>(37.47-37.47)                                                                                                           | 44.30<br>(44.30-44.30) | 48.95<br>(48.95-48.95) | 40.58<br>(36.62-43.75)                                                                        | 37.83<br>(34.65-40.31) | 77.62<br>(74.70-80.15) | 23.17<br>(18.23-28.85)                                                                                                                  | 23.15<br>(18.31-28.44) | 41.83<br>(36.54-47.32) |
| Turkmenistan | 36.42<br>(29.10-43.82)                                                                                                                          | 42.01<br>(34.72-49.17) | 62.21<br>(55.52-68.60) | 52.75<br>(52.75-52.75)                                                                                                           | 56.65<br>(56.65-56.65) | 66.28<br>(66.28-66.28) | 50.37<br>(48.22-52.27)                                                                        | 52.27<br>(50.84-53.64) | 85.38<br>(83.19-87.35) | 41.03<br>(36.70-45.54)                                                                                                                  | 40.68<br>(36.28-45.15) | 52.40<br>(48.26-56.24) |
| Uzbekistan   | 63.33<br>(56.82-69.35)                                                                                                                          | 71.00<br>(65.87-75.76) | 83.66<br>(79.46-87.22) | 39.07<br>(39.07-39.07)                                                                                                           | 53.78<br>(53.78-53.78) | 59.46<br>(59.46-59.46) | 56.72<br>(55.20-58.06)                                                                        | 58.72<br>(57.77-59.71) | 93.29<br>(91.36-95.05) | 35.04<br>(28.44-42.10)                                                                                                                  | 38.07<br>(32.67-43.29) | 47.90<br>(41.92-52.93) |
| Colombia     | 67.80<br>(64.80-70.47)                                                                                                                          | 76.46<br>(74.41-78.28) | 89.24<br>(87.08-91.17) | 36.56<br>(36.56-36.56)                                                                                                           | 36.29<br>(36.29-36.29) | 50.05<br>(50.05-50.05) | 29.74<br>(28.74-31.01)                                                                        | 38.34<br>(36.91-40.75) | 77.07<br>(68.88-87.00) | 57.55<br>(54.06-60.97)                                                                                                                  | 62.60<br>(58.87-65.98) | 71.59<br>(66.97-75.85) |
| Costa Rica   | 74.85<br>(70.91-78.33)                                                                                                                          | 81.74<br>(78.64-84.63) | 91.25<br>(89.58-92.83) | 32.16<br>(32.16-32.16)                                                                                                           | 39.44<br>(39.44-39.44) | 47.75<br>(47.75-47.75) | 53.14<br>(52.25-54.13)                                                                        | 76.83<br>(73.24-81.64) | 94.10<br>(92.45-95.59) | 62.88<br>(58.27-67.19)                                                                                                                  | 70.60<br>(67.18-73.56) | 81.40<br>(77.22-84.83) |
| El Salvador  | 54.75<br>(49.58-59.85)                                                                                                                          | 66.85<br>(62.12-71.32) | 82.19<br>(79.27-84.95) | 29.20<br>(29.20-29.20)                                                                                                           | 34.45<br>(34.45-34.45) | 44.25<br>(44.25-44.25) | 47.73<br>(45.88-49.55)                                                                        | 54.89<br>(53.85-55.94) | 92.33<br>(90.18-94.26) | 46.84<br>(42.85-51.14)                                                                                                                  | 55.42<br>(51.19-59.50) | 66.28<br>(61.25-70.76) |
| Guatemala    | 39.01<br>(34.43-43.56)                                                                                                                          | 46.32<br>(41.96-50.40) | 60.29<br>(55.73-64.95) | 22.24<br>(22.24-22.24)                                                                                                           | 26.51<br>(26.51-26.51) | 36.48<br>(36.48-36.48) | 13.95<br>(12.60-15.54)                                                                        | 23.34<br>(21.81-25.75) | 55.58<br>(48.78-63.82) | 39.09<br>(34.78-43.91)                                                                                                                  | 43.60<br>(39.49-48.18) | 55.77<br>(50.14-61.79) |

**Appendix Table 1a. Scaled values for each SDG health-related indicator and three summary indicators by country for 1990, 2000, and 2015**

| Location            | Indicator 3.7.1: Proportion of women of reproductive age (15 to 49 years) who have their need for family planning satisfied with modern methods |                        |                        | Indicator 3.7.2: Birth rates for women aged 10 to 14 years and women aged 15 to 19 years (number of live births per 1,000 women) |                        |                        | Indicator 3.8.1: Coverage of 7 UHC tracer interventions for prevention and treatment services |                        |                        | Indicator 3.9.1: Age-standardised death rate attributable to household air pollution and ambient air pollution (per 100,000 population) |                        |                        |
|---------------------|-------------------------------------------------------------------------------------------------------------------------------------------------|------------------------|------------------------|----------------------------------------------------------------------------------------------------------------------------------|------------------------|------------------------|-----------------------------------------------------------------------------------------------|------------------------|------------------------|-----------------------------------------------------------------------------------------------------------------------------------------|------------------------|------------------------|
|                     | 1990                                                                                                                                            | 2000                   | 2015                   | 1990                                                                                                                             | 2000                   | 2015                   | 1990                                                                                          | 2000                   | 2015                   | 1990                                                                                                                                    | 2000                   | 2015                   |
| Honduras            | 49.45<br>(44.31-54.49)                                                                                                                          | 61.57<br>(57.69-65.78) | 80.40<br>(77.86-82.78) | 20.72<br>(20.72-20.72)                                                                                                           | 27.18<br>(27.18-27.18) | 43.34<br>(43.34-43.34) | 25.04<br>(23.80-26.58)                                                                        | 31.39<br>(29.92-33.78) | 67.90<br>(60.12-76.42) | 45.49<br>(41.80-49.53)                                                                                                                  | 41.29<br>(35.62-46.66) | 49.12<br>(42.97-55.43) |
| Mexico              | 68.47<br>(64.24-72.32)                                                                                                                          | 74.67<br>(71.52-77.71) | 87.10<br>(84.73-89.29) | 34.59<br>(34.59-34.59)                                                                                                           | 37.62<br>(37.62-37.62) | 44.20<br>(44.20-44.20) | 45.99<br>(43.98-47.85)                                                                        | 63.62<br>(61.52-65.59) | 87.73<br>(84.88-89.80) | 63.64<br>(60.38-66.66)                                                                                                                  | 66.67<br>(63.19-69.67) | 72.20<br>(68.63-75.24) |
| Nicaragua           | 69.44<br>(65.43-73.25)                                                                                                                          | 77.97<br>(75.83-79.93) | 89.67<br>(87.63-91.51) | 15.90<br>(15.90-15.90)                                                                                                           | 26.17<br>(26.17-26.17) | 36.13<br>(36.13-36.13) | 27.78<br>(26.43-29.25)                                                                        | 36.08<br>(34.65-38.60) | 70.58<br>(62.75-79.53) | 56.85<br>(53.41-60.46)                                                                                                                  | 60.40<br>(56.80-63.83) | 65.00<br>(59.92-70.47) |
| Panama              | 74.02<br>(69.88-77.97)                                                                                                                          | 83.45<br>(80.68-86.30) | 92.38<br>(90.86-93.74) | 31.58<br>(31.58-31.58)                                                                                                           | 34.30<br>(34.30-34.30) | 39.06<br>(39.06-39.06) | 32.26<br>(30.81-33.74)                                                                        | 44.89<br>(41.62-48.82) | 68.93<br>(59.57-78.92) | 61.52<br>(57.82-65.05)                                                                                                                  | 69.18<br>(65.54-72.90) | 77.73<br>(72.53-82.45) |
| Venezuela           | 64.68<br>(59.72-69.32)                                                                                                                          | 75.94<br>(72.21-79.41) | 88.26<br>(86.10-90.15) | 30.90<br>(30.90-30.90)                                                                                                           | 34.19<br>(34.19-34.19) | 38.48<br>(38.48-38.48) | 29.22<br>(27.69-30.81)                                                                        | 46.09<br>(43.62-49.34) | 76.78<br>(68.07-85.82) | 61.09<br>(57.46-64.22)                                                                                                                  | 65.36<br>(61.60-68.55) | 70.54<br>(66.12-74.35) |
| Bolivia             | 20.46<br>(14.79-26.61)                                                                                                                          | 31.78<br>(26.43-36.78) | 49.81<br>(41.18-57.58) | 30.71<br>(30.71-30.71)                                                                                                           | 32.65<br>(32.65-32.65) | 40.69<br>(40.69-40.69) | 14.74<br>(13.27-16.33)                                                                        | 28.07<br>(26.55-30.40) | 64.90<br>(58.27-72.87) | 39.71<br>(34.97-44.37)                                                                                                                  | 48.04<br>(43.85-52.05) | 58.59<br>(52.61-63.90) |
| Ecuador             | 55.82<br>(47.30-64.03)                                                                                                                          | 63.37<br>(54.53-70.83) | 79.81<br>(73.53-85.19) | 33.81<br>(33.81-33.81)                                                                                                           | 35.98<br>(35.98-35.98) | 39.06<br>(39.06-39.06) | 52.06<br>(47.80-59.77)                                                                        | 55.55<br>(51.86-59.38) | 88.11<br>(86.16-89.66) | 58.99<br>(55.31-62.55)                                                                                                                  | 66.41<br>(62.45-69.90) | 79.09<br>(74.52-82.99) |
| Peru                | 40.53<br>(34.48-46.50)                                                                                                                          | 57.87<br>(52.06-63.20) | 75.49<br>(68.67-81.45) | 38.55<br>(38.55-38.55)                                                                                                           | 42.38<br>(42.38-42.38) | 50.15<br>(50.15-50.15) | 22.26<br>(20.87-23.83)                                                                        | 36.17<br>(34.51-38.96) | 80.19<br>(70.48-88.84) | 43.93<br>(39.56-48.43)                                                                                                                  | 53.51<br>(49.78-57.37) | 64.37<br>(58.90-69.15) |
| Antigua and Barbuda | 87.15<br>(81.43-91.65)                                                                                                                          | 92.83<br>(89.40-95.56) | 95.42<br>(93.03-97.30) | 44.30<br>(44.30-44.30)                                                                                                           | 44.29<br>(44.29-44.29) | 52.80<br>(52.80-52.80) | 59.75<br>(58.63-60.76)                                                                        | 64.17<br>(63.20-65.53) | 94.75<br>(93.27-96.06) | 69.04<br>(62.38-76.49)                                                                                                                  | 72.81<br>(66.12-80.05) | 78.83<br>(71.52-86.41) |
| The Bahamas         | 80.74<br>(72.88-86.93)                                                                                                                          | 87.86<br>(82.84-91.94) | 93.78<br>(90.79-96.26) | 41.04<br>(41.04-41.04)                                                                                                           | 49.34<br>(49.34-49.34) | 61.60<br>(61.60-61.60) | 59.15<br>(57.62-60.49)                                                                        | 82.76<br>(77.44-86.73) | 96.98<br>(95.74-98.15) | 63.54<br>(57.69-69.74)                                                                                                                  | 69.90<br>(63.96-75.96) | 78.55<br>(71.94-85.05) |
| Barbados            | 72.14<br>(62.89-80.18)                                                                                                                          | 82.93<br>(75.65-88.31) | 90.88<br>(86.55-94.28) | 48.77<br>(48.77-48.77)                                                                                                           | 50.00<br>(50.00-50.00) | 56.16<br>(56.16-56.16) | 58.56<br>(57.34-59.72)                                                                        | 60.89<br>(59.19-63.77) | 93.46<br>(90.99-95.44) | 71.47<br>(65.01-78.58)                                                                                                                  | 75.39<br>(67.47-83.84) | 81.39<br>(73.30-90.12) |

**Appendix Table 1a. Scaled values for each SDG health-related indicator and three summary indicators by country for 1990, 2000, and 2015**

| Location                         | Indicator 3.7.1: Proportion of women of reproductive age (15 to 49 years) who have their need for family planning satisfied with modern methods |                        |                        | Indicator 3.7.2: Birth rates for women aged 10 to 14 years and women aged 15 to 19 years (number of live births per 1,000 women) |                        |                        | Indicator 3.8.1: Coverage of 7 UHC tracer interventions for prevention and treatment services |                        |                        | Indicator 3.9.1: Age-standardised death rate attributable to household air pollution and ambient air pollution (per 100,000 population) |                        |                        |
|----------------------------------|-------------------------------------------------------------------------------------------------------------------------------------------------|------------------------|------------------------|----------------------------------------------------------------------------------------------------------------------------------|------------------------|------------------------|-----------------------------------------------------------------------------------------------|------------------------|------------------------|-----------------------------------------------------------------------------------------------------------------------------------------|------------------------|------------------------|
|                                  | 1990                                                                                                                                            | 2000                   | 2015                   | 1990                                                                                                                             | 2000                   | 2015                   | 1990                                                                                          | 2000                   | 2015                   | 1990                                                                                                                                    | 2000                   | 2015                   |
| Belize                           | 44.95<br>(32.96-56.57)                                                                                                                          | 52.21<br>(41.11-63.16) | 69.17<br>(59.23-78.03) | 22.18<br>(22.18-22.18)                                                                                                           | 30.37<br>(30.37-30.37) | 42.26<br>(42.26-42.26) | 48.83<br>(46.72-50.96)                                                                        | 58.06<br>(53.35-63.00) | 90.61<br>(88.16-93.04) | 50.66<br>(46.32-55.11)                                                                                                                  | 50.94<br>(46.63-55.35) | 61.06<br>(55.84-65.77) |
| Cuba                             | 70.23<br>(59.53-79.12)                                                                                                                          | 82.66<br>(75.69-88.33) | 92.65<br>(88.92-95.56) | 40.02<br>(40.02-40.02)                                                                                                           | 46.95<br>(46.95-46.95) | 52.07<br>(52.07-52.07) | 54.89<br>(53.56-56.09)                                                                        | 61.44<br>(60.55-62.39) | 94.11<br>(92.38-96.47) | 59.34<br>(54.20-64.00)                                                                                                                  | 57.74<br>(53.25-62.26) | 71.63<br>(67.69-74.87) |
| Dominica                         | 69.63<br>(59.23-78.33)                                                                                                                          | 80.50<br>(73.33-86.48) | 90.26<br>(85.89-94.06) | 40.61<br>(40.61-40.61)                                                                                                           | 56.36<br>(56.36-56.36) | 61.33<br>(61.33-61.33) | 59.96<br>(58.77-61.09)                                                                        | 62.65<br>(61.57-64.02) | 93.02<br>(91.53-94.34) | 58.95<br>(52.97-65.69)                                                                                                                  | 68.32<br>(62.49-73.56) | 75.96<br>(69.44-82.22) |
| Dominican Republic               | 69.15<br>(61.60-75.57)                                                                                                                          | 78.21<br>(73.93-81.98) | 85.13<br>(80.56-89.02) | 26.31<br>(26.31-26.31)                                                                                                           | 27.61<br>(27.61-27.61) | 32.05<br>(32.05-32.05) | 46.18<br>(44.85-47.56)                                                                        | 53.42<br>(52.19-54.62) | 84.13<br>(81.45-86.51) | 59.65<br>(55.07-64.06)                                                                                                                  | 63.70<br>(59.76-67.20) | 67.81<br>(63.80-71.51) |
| Grenada                          | 61.59<br>(50.88-71.99)                                                                                                                          | 72.13<br>(62.52-80.16) | 87.35<br>(81.51-91.83) | 30.92<br>(30.92-30.92)                                                                                                           | 47.44<br>(47.44-47.44) | 60.52<br>(60.52-60.52) | 53.53<br>(52.01-55.09)                                                                        | 57.35<br>(56.18-58.79) | 92.37<br>(90.84-93.70) | 49.94<br>(42.99-57.28)                                                                                                                  | 61.80<br>(55.04-68.41) | 69.89<br>(63.19-77.01) |
| Guyana                           | 45.28<br>(34.08-57.67)                                                                                                                          | 53.90<br>(42.43-64.57) | 65.07<br>(55.51-73.86) | 29.94<br>(29.94-29.94)                                                                                                           | 31.31<br>(31.31-31.31) | 34.74<br>(34.74-34.74) | 22.82<br>(20.83-24.89)                                                                        | 31.07<br>(28.59-34.63) | 76.07<br>(68.98-82.60) | 45.17<br>(38.63-51.11)                                                                                                                  | 51.15<br>(46.27-55.93) | 59.83<br>(54.37-65.98) |
| Haiti                            | 18.88<br>(12.07-26.52)                                                                                                                          | 26.48<br>(20.17-32.98) | 41.50<br>(32.84-49.94) | 38.05<br>(38.05-38.05)                                                                                                           | 44.27<br>(44.27-44.27) | 53.38<br>(53.38-53.38) | 9.08<br>(7.58-10.86)                                                                          | 14.66<br>(12.98-16.86) | 55.62<br>(49.47-60.37) | 22.37<br>(17.63-27.66)                                                                                                                  | 29.54<br>(24.00-35.28) | 34.37<br>(28.29-40.60) |
| Jamaica                          | 65.59<br>(53.94-75.01)                                                                                                                          | 77.73<br>(69.19-84.92) | 87.86<br>(82.55-92.18) | 29.10<br>(29.10-29.10)                                                                                                           | 35.03<br>(35.03-35.03) | 45.33<br>(45.33-45.33) | 53.60<br>(51.30-55.67)                                                                        | 58.35<br>(57.01-59.70) | 93.39<br>(91.86-94.73) | 58.27<br>(53.96-62.28)                                                                                                                  | 66.25<br>(62.00-70.38) | 72.43<br>(67.80-76.99) |
| Saint Lucia                      | 63.16<br>(52.63-73.40)                                                                                                                          | 74.89<br>(65.52-83.18) | 87.74<br>(82.27-92.02) | 28.60<br>(28.60-28.60)                                                                                                           | 43.56<br>(43.56-43.56) | 49.39<br>(49.39-49.39) | 57.94<br>(56.55-59.32)                                                                        | 60.27<br>(59.02-61.68) | 92.59<br>(91.16-93.97) | 52.77<br>(47.53-57.69)                                                                                                                  | 63.61<br>(58.15-69.17) | 74.82<br>(69.35-80.12) |
| Saint Vincent and the Grenadines | 65.13<br>(54.57-74.53)                                                                                                                          | 76.80<br>(67.88-84.02) | 88.73<br>(83.39-92.88) | 33.47<br>(33.47-33.47)                                                                                                           | 41.73<br>(41.73-41.73) | 49.68<br>(49.68-49.68) | 49.17<br>(47.93-50.38)                                                                        | 56.08<br>(55.02-57.38) | 89.58<br>(88.14-90.92) | 47.04<br>(42.55-51.72)                                                                                                                  | 57.17<br>(50.44-64.04) | 69.86<br>(63.48-76.60) |
| Suriname                         | 55.26<br>(43.83-66.64)                                                                                                                          | 59.46<br>(48.59-70.09) | 73.65<br>(63.65-81.89) | 40.22<br>(40.22-40.22)                                                                                                           | 45.32<br>(45.32-45.32) | 51.36<br>(51.36-51.36) | 24.46<br>(22.72-26.23)                                                                        | 33.99<br>(32.16-36.64) | 75.23<br>(66.87-84.37) | 49.18<br>(43.38-55.56)                                                                                                                  | 54.31<br>(47.68-60.87) | 68.68<br>(62.11-75.22) |

**Appendix Table 1a. Scaled values for each SDG health-related indicator and three summary indicators by country for 1990, 2000, and 2015**

| Location            | Indicator 3.7.1: Proportion of women of reproductive age (15 to 49 years) who have their need for family planning satisfied with modern methods |                        |                        | Indicator 3.7.2: Birth rates for women aged 10 to 14 years and women aged 15 to 19 years (number of live births per 1,000 women) |                        |                        | Indicator 3.8.1: Coverage of 7 UHC tracer interventions for prevention and treatment services |                        |                        | Indicator 3.9.1: Age-standardised death rate attributable to household air pollution and ambient air pollution (per 100,000 population) |                        |                        |
|---------------------|-------------------------------------------------------------------------------------------------------------------------------------------------|------------------------|------------------------|----------------------------------------------------------------------------------------------------------------------------------|------------------------|------------------------|-----------------------------------------------------------------------------------------------|------------------------|------------------------|-----------------------------------------------------------------------------------------------------------------------------------------|------------------------|------------------------|
|                     | 1990                                                                                                                                            | 2000                   | 2015                   | 1990                                                                                                                             | 2000                   | 2015                   | 1990                                                                                          | 2000                   | 2015                   | 1990                                                                                                                                    | 2000                   | 2015                   |
| Trinidad and Tobago | 65.36<br>(54.69-74.74)                                                                                                                          | 56.01<br>(44.38-66.59) | 76.19<br>(68.01-83.60) | 43.07<br>(43.07-43.07)                                                                                                           | 53.42<br>(53.42-53.42) | 59.61<br>(59.61-59.61) | 54.63<br>(52.62-56.50)                                                                        | 57.41<br>(55.56-59.34) | 92.99<br>(90.68-94.76) | 60.33<br>(56.03-64.28)                                                                                                                  | 64.71<br>(60.55-68.50) | 74.13<br>(69.76-78.10) |
| Brazil              | 75.74<br>(72.22-78.78)                                                                                                                          | 84.64<br>(82.23-86.77) | 92.72<br>(91.27-93.95) | 36.84<br>(36.84-36.84)                                                                                                           | 36.76<br>(36.76-36.76) | 43.35<br>(43.35-43.35) | 29.34<br>(28.20-30.74)                                                                        | 58.76<br>(55.35-63.66) | 80.65<br>(72.26-90.58) | 49.98<br>(47.04-53.29)                                                                                                                  | 57.56<br>(54.30-60.78) | 72.37<br>(68.61-75.34) |
| Paraguay            | 52.63<br>(48.81-56.58)                                                                                                                          | 66.40<br>(62.06-70.20) | 85.11<br>(82.63-87.35) | 31.31<br>(31.31-31.31)                                                                                                           | 35.37<br>(35.37-35.37) | 46.11<br>(46.11-46.11) | 45.15<br>(43.77-46.67)                                                                        | 51.35<br>(50.01-52.64) | 87.42<br>(84.66-89.92) | 49.21<br>(45.65-52.87)                                                                                                                  | 52.39<br>(49.02-56.04) | 60.88<br>(56.30-65.49) |
| China               | 59.62<br>(49.94-68.40)                                                                                                                          | 71.81<br>(65.19-78.01) | 86.10<br>(79.34-91.54) | 55.24<br>(55.24-55.24)                                                                                                           | 69.15<br>(69.15-69.15) | 69.11<br>(69.11-69.11) | 35.67<br>(32.56-38.56)                                                                        | 47.38<br>(45.74-48.79) | 80.71<br>(78.13-83.06) | 25.31<br>(19.78-31.15)                                                                                                                  | 31.53<br>(26.80-36.62) | 48.12<br>(44.19-51.69) |
| North Korea         | 30.31<br>(17.35-43.36)                                                                                                                          | 39.84<br>(27.21-53.24) | 61.68<br>(51.03-71.73) | 85.90<br>(85.90-85.90)                                                                                                           | 92.89<br>(92.89-92.89) | 92.73<br>(92.73-92.73) | 29.57<br>(26.99-32.02)                                                                        | 44.41<br>(41.63-46.71) | 77.43<br>(72.01-82.39) | 34.67<br>(26.23-42.35)                                                                                                                  | 34.29<br>(26.84-41.99) | 39.27<br>(32.69-45.69) |
| Taiwan              | 71.68<br>(60.63-81.69)                                                                                                                          | 79.17<br>(69.93-86.71) | 88.70<br>(82.50-93.09) | 67.48<br>(67.48-67.48)                                                                                                           | 72.22<br>(72.22-72.22) | 91.40<br>(91.40-91.40) | 58.72<br>(56.35-60.69)                                                                        | 61.60<br>(60.20-62.75) | 82.43<br>(79.92-84.85) | 67.28<br>(63.35-70.89)                                                                                                                  | 72.29<br>(68.04-76.03) | 75.55<br>(70.66-80.34) |
| Cambodia            | 20.15<br>(14.57-26.29)                                                                                                                          | 26.74<br>(24.10-29.61) | 53.30<br>(50.68-55.78) | 33.97<br>(33.97-33.97)                                                                                                           | 45.95<br>(45.95-45.95) | 45.41<br>(45.41-45.41) | 3.87<br>(1.96-5.88)                                                                           | 12.46<br>(10.80-14.51) | 56.98<br>(50.92-64.69) | 26.16<br>(20.93-31.70)                                                                                                                  | 28.33<br>(23.65-33.24) | 38.84<br>(34.15-43.68) |
| Indonesia           | 70.74<br>(66.38-74.96)                                                                                                                          | 79.51<br>(76.33-82.38) | 88.93<br>(86.58-91.08) | 40.55<br>(40.55-40.55)                                                                                                           | 49.15<br>(49.15-49.15) | 48.76<br>(48.76-48.76) | 12.98<br>(11.88-14.51)                                                                        | 19.03<br>(17.66-21.02) | 51.75<br>(45.50-58.94) | 44.45<br>(39.83-49.18)                                                                                                                  | 49.20<br>(44.78-53.87) | 57.66<br>(52.31-63.62) |
| Laos                | 28.01<br>(21.79-34.94)                                                                                                                          | 37.09<br>(32.35-41.80) | 50.16<br>(42.26-57.42) | 25.27<br>(25.27-25.27)                                                                                                           | 35.02<br>(35.02-35.02) | 41.72<br>(41.72-41.72) | 1.20<br>(0.00-3.35)                                                                           | 8.06<br>(6.46-9.92)    | 48.28<br>(44.42-51.96) | 21.00<br>(14.14-28.03)                                                                                                                  | 24.58<br>(19.43-29.96) | 35.87<br>(30.45-41.34) |
| Malaysia            | 35.05<br>(27.56-43.09)                                                                                                                          | 43.40<br>(36.02-51.09) | 62.46<br>(55.72-68.96) | 63.56<br>(63.56-63.56)                                                                                                           | 70.34<br>(70.34-70.34) | 75.51<br>(75.51-75.51) | 50.99<br>(49.40-52.60)                                                                        | 58.91<br>(56.06-62.54) | 88.82<br>(87.39-90.20) | 57.50<br>(51.86-62.46)                                                                                                                  | 62.76<br>(58.56-66.76) | 67.34<br>(62.45-71.83) |
| Maldives            | 23.75<br>(17.32-30.59)                                                                                                                          | 29.77<br>(22.97-37.08) | 46.06<br>(38.52-53.48) | 19.67<br>(19.67-19.67)                                                                                                           | 55.00<br>(55.00-55.00) | 72.60<br>(72.60-72.60) | 42.70<br>(39.41-45.73)                                                                        | 52.18<br>(50.52-53.79) | 79.29<br>(77.43-81.05) | 43.00<br>(38.35-48.10)                                                                                                                  | 56.60<br>(52.11-61.00) | 71.71<br>(65.95-76.90) |

**Appendix Table 1a. Scaled values for each SDG health-related indicator and three summary indicators by country for 1990, 2000, and 2015**

| Location                       | Indicator 3.7.1: Proportion of women of reproductive age (15 to 49 years) who have their need for family planning satisfied with modern methods |                        |                        | Indicator 3.7.2: Birth rates for women aged 10 to 14 years and women aged 15 to 19 years (number of live births per 1,000 women) |                        |                        | Indicator 3.8.1: Coverage of 7 UHC tracer interventions for prevention and treatment services |                        |                        | Indicator 3.9.1: Age-standardised death rate attributable to household air pollution and ambient air pollution (per 100,000 population) |                        |                        |
|--------------------------------|-------------------------------------------------------------------------------------------------------------------------------------------------|------------------------|------------------------|----------------------------------------------------------------------------------------------------------------------------------|------------------------|------------------------|-----------------------------------------------------------------------------------------------|------------------------|------------------------|-----------------------------------------------------------------------------------------------------------------------------------------|------------------------|------------------------|
|                                | 1990                                                                                                                                            | 2000                   | 2015                   | 1990                                                                                                                             | 2000                   | 2015                   | 1990                                                                                          | 2000                   | 2015                   | 1990                                                                                                                                    | 2000                   | 2015                   |
| Mauritius                      | 42.08<br>(34.97-49.96)                                                                                                                          | 49.91<br>(42.50-57.25) | 66.36<br>(59.45-72.57) | 49.62<br>(49.62-49.62)                                                                                                           | 54.32<br>(54.32-54.32) | 63.09<br>(63.09-63.09) | 51.27<br>(49.95-52.62)                                                                        | 53.54<br>(52.42-54.73) | 83.38<br>(81.91-84.60) | 49.53<br>(43.48-54.49)                                                                                                                  | 58.23<br>(54.11-62.18) | 73.76<br>(69.79-77.33) |
| Myanmar                        | 23.35<br>(17.30-30.23)                                                                                                                          | 31.46<br>(24.21-39.06) | 49.83<br>(42.13-57.45) | 54.74<br>(54.74-54.74)                                                                                                           | 61.41<br>(61.41-61.41) | 69.64<br>(69.64-69.64) | 11.70<br>(9.94-13.69)                                                                         | 18.75<br>(17.38-20.63) | 60.49<br>(53.71-68.02) | 29.74<br>(19.72-38.73)                                                                                                                  | 32.04<br>(21.84-41.69) | 39.96<br>(30.86-49.93) |
| Philippines                    | 30.68<br>(26.40-35.01)                                                                                                                          | 40.81<br>(38.35-43.29) | 50.39<br>(47.35-53.56) | 45.10<br>(45.10-45.10)                                                                                                           | 44.93<br>(44.93-44.93) | 43.26<br>(43.26-43.26) | 20.75<br>(19.59-22.17)                                                                        | 24.87<br>(23.54-26.95) | 56.95<br>(50.15-64.49) | 42.17<br>(37.81-46.65)                                                                                                                  | 43.97<br>(39.90-48.22) | 43.85<br>(39.19-48.83) |
| Sri Lanka                      | 48.49<br>(43.16-53.43)                                                                                                                          | 47.42<br>(42.37-52.08) | 69.42<br>(62.93-74.86) | 58.05<br>(58.05-58.05)                                                                                                           | 60.64<br>(60.64-60.64) | 75.16<br>(75.16-75.16) | 51.20<br>(49.49-52.82)                                                                        | 54.76<br>(53.62-55.91) | 86.67<br>(85.08-88.37) | 48.30<br>(45.06-51.55)                                                                                                                  | 50.49<br>(47.22-53.68) | 58.56<br>(53.23-64.12) |
| Seychelles                     | 56.46<br>(48.91-63.60)                                                                                                                          | 69.78<br>(63.16-76.06) | 85.19<br>(80.92-88.66) | 40.00<br>(40.00-40.00)                                                                                                           | 45.64<br>(45.64-45.64) | 46.86<br>(46.86-46.86) | 53.80<br>(51.66-55.66)                                                                        | 67.87<br>(64.51-71.86) | 92.06<br>(89.85-94.83) | 59.13<br>(50.65-68.15)                                                                                                                  | 65.70<br>(57.21-74.97) | 75.97<br>(66.39-86.87) |
| Thailand                       | 41.42<br>(34.00-48.79)                                                                                                                          | 56.22<br>(49.23-63.27) | 65.64<br>(62.15-68.90) | 48.24<br>(48.24-48.24)                                                                                                           | 52.95<br>(52.95-52.95) | 53.77<br>(53.77-53.77) | 26.61<br>(25.18-28.26)                                                                        | 36.62<br>(33.41-40.50) | 68.93<br>(61.46-77.22) | 48.65<br>(44.69-52.81)                                                                                                                  | 52.95<br>(49.03-56.89) | 60.89<br>(55.71-66.40) |
| Timor-Leste                    | 17.96<br>(12.20-24.31)                                                                                                                          | 22.84<br>(16.75-29.10) | 40.90<br>(34.51-47.44) | 39.98<br>(39.98-39.98)                                                                                                           | 30.81<br>(30.81-30.81) | 45.82<br>(45.82-45.82) | 3.87<br>(1.57-6.44)                                                                           | 12.91<br>(9.31-17.07)  | 54.51<br>(48.51-60.46) | 32.93<br>(26.13-40.06)                                                                                                                  | 38.80<br>(33.28-44.14) | 48.10<br>(41.58-54.29) |
| Vietnam                        | 53.32<br>(46.24-59.77)                                                                                                                          | 65.63<br>(63.02-68.14) | 80.31<br>(75.45-84.75) | 52.26<br>(52.26-52.26)                                                                                                           | 57.62<br>(57.62-57.62) | 54.02<br>(54.02-54.02) | 15.37<br>(13.23-17.51)                                                                        | 28.56<br>(26.94-31.15) | 68.44<br>(60.69-76.75) | 44.72<br>(39.29-49.60)                                                                                                                  | 46.59<br>(41.63-51.49) | 56.46<br>(50.74-62.42) |
| Federated States of Micronesia | 57.21<br>(51.78-62.71)                                                                                                                          | 69.40<br>(64.60-73.75) | 82.73<br>(79.41-85.63) | 32.92<br>(32.92-32.92)                                                                                                           | 40.31<br>(40.31-40.31) | 59.89<br>(59.89-59.89) | 47.37<br>(43.36-50.45)                                                                        | 48.51<br>(45.57-50.77) | 81.01<br>(76.59-84.93) | 42.16<br>(30.49-54.77)                                                                                                                  | 48.31<br>(36.60-59.58) | 59.35<br>(45.98-73.27) |
| Fiji                           | 58.18<br>(52.91-63.95)                                                                                                                          | 69.26<br>(64.66-73.44) | 85.88<br>(83.25-88.44) | 38.61<br>(38.61-38.61)                                                                                                           | 47.38<br>(47.38-47.38) | 49.04<br>(49.04-49.04) | 51.29<br>(48.75-53.04)                                                                        | 53.41<br>(51.55-54.78) | 81.91<br>(79.38-83.94) | 44.82<br>(38.53-51.32)                                                                                                                  | 49.84<br>(43.23-56.73) | 65.61<br>(57.95-73.53) |
| Kiribati                       | 43.47<br>(37.52-49.35)                                                                                                                          | 50.31<br>(44.45-56.13) | 63.99<br>(58.98-68.94) | 46.56<br>(46.56-46.56)                                                                                                           | 52.52<br>(52.52-52.52) | 68.80<br>(68.80-68.80) | 45.33<br>(41.37-48.23)                                                                        | 51.37<br>(47.74-53.67) | 80.87<br>(75.82-84.23) | 44.63<br>(37.99-52.15)                                                                                                                  | 48.71<br>(40.10-58.85) | 61.89<br>(51.10-73.98) |

**Appendix Table 1a. Scaled values for each SDG health-related indicator and three summary indicators by country for 1990, 2000, and 2015**

| Location         | Indicator 3.7.1: Proportion of women of reproductive age (15 to 49 years) who have their need for family planning satisfied with modern methods |                        |                        | Indicator 3.7.2: Birth rates for women aged 10 to 14 years and women aged 15 to 19 years (number of live births per 1,000 women) |                        |                        | Indicator 3.8.1: Coverage of 7 UHC tracer interventions for prevention and treatment services |                        |                        | Indicator 3.9.1: Age-standardised death rate attributable to household air pollution and ambient air pollution (per 100,000 population) |                        |                        |
|------------------|-------------------------------------------------------------------------------------------------------------------------------------------------|------------------------|------------------------|----------------------------------------------------------------------------------------------------------------------------------|------------------------|------------------------|-----------------------------------------------------------------------------------------------|------------------------|------------------------|-----------------------------------------------------------------------------------------------------------------------------------------|------------------------|------------------------|
|                  | 1990                                                                                                                                            | 2000                   | 2015                   | 1990                                                                                                                             | 2000                   | 2015                   | 1990                                                                                          | 2000                   | 2015                   | 1990                                                                                                                                    | 2000                   | 2015                   |
| Marshall Islands | 50.51<br>(44.72-56.19)                                                                                                                          | 61.75<br>(56.72-66.82) | 78.75<br>(75.06-82.17) | 24.49<br>(24.49-24.49)                                                                                                           | 29.60<br>(29.60-29.60) | 41.74<br>(41.74-41.74) | 37.93<br>(31.23-44.41)                                                                        | 44.51<br>(39.27-48.78) | 74.32<br>(68.82-79.17) | 52.43<br>(39.58-71.20)                                                                                                                  | 50.61<br>(38.52-66.81) | 60.43<br>(45.66-80.97) |
| Papua New Guinea | 35.10<br>(29.30-40.69)                                                                                                                          | 38.77<br>(33.64-43.75) | 47.33<br>(41.84-52.90) | 35.53<br>(35.53-35.53)                                                                                                           | 38.33<br>(38.33-38.33) | 44.39<br>(44.39-44.39) | 16.63<br>(14.29-18.90)                                                                        | 18.83<br>(16.76-21.30) | 45.31<br>(38.83-51.98) | 18.73<br>(8.01-30.09)                                                                                                                   | 22.10<br>(10.66-33.70) | 27.57<br>(15.53-39.07) |
| Samoa            | 41.19<br>(36.19-46.74)                                                                                                                          | 54.04<br>(48.12-59.27) | 69.35<br>(64.93-73.68) | 51.58<br>(51.58-51.58)                                                                                                           | 49.37<br>(49.37-49.37) | 60.46<br>(60.46-60.46) | 42.38<br>(36.33-47.10)                                                                        | 46.21<br>(42.28-49.60) | 71.11<br>(65.33-76.29) | 50.70<br>(43.38-57.81)                                                                                                                  | 56.00<br>(49.11-62.81) | 65.13<br>(57.74-73.63) |
| Solomon Islands  | 32.59<br>(27.01-38.11)                                                                                                                          | 38.95<br>(33.05-44.72) | 53.91<br>(48.04-59.56) | 29.62<br>(29.62-29.62)                                                                                                           | 37.35<br>(37.35-37.35) | 47.48<br>(47.48-47.48) | 19.13<br>(15.53-22.13)                                                                        | 24.23<br>(21.85-26.80) | 55.22<br>(48.12-63.00) | 28.93<br>(18.41-39.55)                                                                                                                  | 32.22<br>(21.03-42.69) | 38.08<br>(25.79-48.91) |
| Tonga            | 57.24<br>(51.80-62.53)                                                                                                                          | 68.80<br>(63.93-73.52) | 83.96<br>(80.92-86.60) | 58.48<br>(58.48-58.48)                                                                                                           | 61.23<br>(61.23-61.23) | 69.29<br>(69.29-69.29) | 54.61<br>(51.70-56.51)                                                                        | 58.74<br>(56.31-60.03) | 87.29<br>(84.05-89.58) | 51.03<br>(44.65-57.51)                                                                                                                  | 54.87<br>(48.70-61.04) | 68.79<br>(59.95-78.72) |
| Vanuatu          | 38.91<br>(33.16-44.73)                                                                                                                          | 47.30<br>(41.60-53.14) | 65.40<br>(59.96-70.27) | 35.72<br>(35.72-35.72)                                                                                                           | 40.87<br>(40.87-40.87) | 49.49<br>(49.49-49.49) | 23.92<br>(20.96-26.49)                                                                        | 28.09<br>(25.23-30.90) | 57.75<br>(50.34-66.03) | 29.21<br>(18.65-39.11)                                                                                                                  | 31.75<br>(21.10-43.01) | 39.85<br>(28.63-49.86) |
| Afghanistan      | 36.40<br>(28.96-44.35)                                                                                                                          | 35.96<br>(28.05-44.36) | 39.28<br>(33.11-45.78) | 11.07<br>(11.07-11.07)                                                                                                           | 12.93<br>(12.93-12.93) | 37.38<br>(37.38-37.38) | 4.82<br>(2.55-7.38)                                                                           | 7.88<br>(5.88-9.93)    | 28.16<br>(23.62-33.17) | 5.33<br>(0.00-13.66)                                                                                                                    | 3.52<br>(0.00-11.39)   | 11.02<br>(3.05-19.40)  |
| Algeria          | 56.17<br>(48.35-64.11)                                                                                                                          | 60.70<br>(52.75-67.82) | 67.88<br>(61.67-73.65) | 56.29<br>(56.29-56.29)                                                                                                           | 73.68<br>(73.68-73.68) | 72.70<br>(72.70-72.70) | 46.14<br>(43.77-48.34)                                                                        | 52.93<br>(51.13-54.55) | 90.01<br>(87.94-91.77) | 59.73<br>(53.73-64.50)                                                                                                                  | 65.41<br>(61.40-69.05) | 69.86<br>(65.50-73.51) |
| Bahrain          | 37.95<br>(30.29-46.04)                                                                                                                          | 49.43<br>(42.06-56.86) | 65.16<br>(57.69-72.51) | 57.23<br>(57.23-57.23)                                                                                                           | 65.29<br>(65.29-65.29) | 69.80<br>(69.80-69.80) | 53.43<br>(51.80-55.12)                                                                        | 58.40<br>(56.30-61.99) | 85.02<br>(83.19-86.72) | 50.00<br>(45.02-55.00)                                                                                                                  | 55.56<br>(51.04-59.72) | 69.40<br>(63.98-74.40) |
| Egypt            | 62.40<br>(57.46-67.86)                                                                                                                          | 76.90<br>(73.43-80.00) | 85.58<br>(82.69-88.44) | 33.01<br>(33.01-33.01)                                                                                                           | 44.60<br>(44.60-44.60) | 43.14<br>(43.14-43.14) | 30.19<br>(28.84-31.61)                                                                        | 47.56<br>(46.54-48.69) | 79.75<br>(78.02-81.42) | 43.89<br>(39.80-48.02)                                                                                                                  | 49.45<br>(45.60-53.29) | 49.37<br>(45.42-53.32) |
| Iran             | 34.37<br>(26.60-42.50)                                                                                                                          | 46.84<br>(38.44-55.12) | 73.52<br>(67.80-78.92) | 31.81<br>(31.81-31.81)                                                                                                           | 54.01<br>(54.01-54.01) | 63.65<br>(63.65-63.65) | 48.68<br>(46.70-50.55)                                                                        | 59.92<br>(55.74-65.05) | 89.80<br>(88.74-90.72) | 52.02<br>(46.78-56.77)                                                                                                                  | 56.35<br>(52.16-60.33) | 60.23<br>(55.34-65.22) |

**Appendix Table 1a. Scaled values for each SDG health-related indicator and three summary indicators by country for 1990, 2000, and 2015**

| Location     | Indicator 3.7.1: Proportion of women of reproductive age (15 to 49 years) who have their need for family planning satisfied with modern methods |                        |                        | Indicator 3.7.2: Birth rates for women aged 10 to 14 years and women aged 15 to 19 years (number of live births per 1,000 women) |                        |                        | Indicator 3.8.1: Coverage of 7 UHC tracer interventions for prevention and treatment services |                        |                        | Indicator 3.9.1: Age-standardised death rate attributable to household air pollution and ambient air pollution (per 100,000 population) |                        |                        |
|--------------|-------------------------------------------------------------------------------------------------------------------------------------------------|------------------------|------------------------|----------------------------------------------------------------------------------------------------------------------------------|------------------------|------------------------|-----------------------------------------------------------------------------------------------|------------------------|------------------------|-----------------------------------------------------------------------------------------------------------------------------------------|------------------------|------------------------|
|              | 1990                                                                                                                                            | 2000                   | 2015                   | 1990                                                                                                                             | 2000                   | 2015                   | 1990                                                                                          | 2000                   | 2015                   | 1990                                                                                                                                    | 2000                   | 2015                   |
| Iraq         | 26.20<br>(18.62-34.09)                                                                                                                          | 32.19<br>(24.38-40.66) | 44.44<br>(36.14-52.72) | 37.99<br>(37.99-37.99)                                                                                                           | 40.81<br>(40.81-40.81) | 33.56<br>(33.56-33.56) | 37.17<br>(34.54-39.62)                                                                        | 42.08<br>(40.15-44.57) | 71.30<br>(68.59-73.96) | 45.59<br>(39.79-51.45)                                                                                                                  | 44.03<br>(38.48-49.23) | 49.73<br>(43.56-55.80) |
| Jordan       | 39.43<br>(33.46-45.74)                                                                                                                          | 52.78<br>(47.04-58.14) | 64.49<br>(59.03-70.40) | 41.59<br>(41.59-41.59)                                                                                                           | 51.99<br>(51.99-51.99) | 62.15<br>(62.15-62.15) | 53.97<br>(52.78-55.26)                                                                        | 60.44<br>(58.83-63.89) | 85.90<br>(84.11-87.73) | 59.17<br>(54.27-63.29)                                                                                                                  | 62.47<br>(58.51-66.42) | 71.52<br>(67.17-75.54) |
| Kuwait       | 45.54<br>(37.66-53.82)                                                                                                                          | 58.49<br>(50.09-65.96) | 77.33<br>(71.49-82.82) | 62.95<br>(62.95-62.95)                                                                                                           | 61.27<br>(61.27-61.27) | 72.74<br>(72.74-72.74) | 39.61<br>(36.10-42.71)                                                                        | 53.76<br>(49.85-58.31) | 83.14<br>(80.82-85.16) | 64.18<br>(59.77-68.08)                                                                                                                  | 62.71<br>(58.52-66.56) | 66.63<br>(62.01-71.56) |
| Lebanon      | 42.50<br>(34.23-51.03)                                                                                                                          | 52.22<br>(43.87-59.95) | 67.73<br>(59.98-74.22) | 49.63<br>(49.63-49.63)                                                                                                           | 63.43<br>(63.43-63.43) | 75.81<br>(75.81-75.81) | 51.94<br>(49.72-54.02)                                                                        | 65.18<br>(59.62-70.82) | 87.74<br>(85.27-90.65) | 58.88<br>(53.37-64.11)                                                                                                                  | 67.98<br>(63.24-72.32) | 70.56<br>(64.64-76.61) |
| Libya        | 32.91<br>(25.39-41.19)                                                                                                                          | 38.66<br>(30.66-46.96) | 51.53<br>(43.26-59.94) | 71.46<br>(71.46-71.46)                                                                                                           | 82.35<br>(82.35-82.35) | 83.71<br>(83.71-83.71) | 40.27<br>(37.73-42.67)                                                                        | 50.27<br>(47.19-55.19) | 77.95<br>(75.22-80.71) | 57.97<br>(52.99-62.76)                                                                                                                  | 60.44<br>(56.48-64.40) | 57.71<br>(52.71-62.39) |
| Morocco      | 55.46<br>(48.76-61.84)                                                                                                                          | 65.82<br>(60.16-71.56) | 77.72<br>(72.00-82.86) | 51.40<br>(51.40-51.40)                                                                                                           | 57.30<br>(57.30-57.30) | 58.80<br>(58.80-58.80) | 28.46<br>(27.08-29.90)                                                                        | 45.67<br>(44.59-46.83) | 79.90<br>(77.09-82.72) | 59.43<br>(51.26-65.97)                                                                                                                  | 66.20<br>(61.16-71.07) | 70.36<br>(63.78-76.14) |
| Palestine    | 36.59<br>(28.37-44.91)                                                                                                                          | 46.85<br>(37.91-54.90) | 55.70<br>(47.50-63.29) | 24.63<br>(24.63-24.63)                                                                                                           | 32.68<br>(32.68-32.68) | 41.72<br>(41.72-41.72) | 48.52<br>(46.77-50.18)                                                                        | 49.20<br>(47.77-51.34) | 74.43<br>(72.68-76.10) | 63.19<br>(57.29-68.89)                                                                                                                  | 67.40<br>(63.33-71.14) | 64.14<br>(58.54-69.63) |
| Oman         | 29.12<br>(21.88-36.81)                                                                                                                          | 33.04<br>(25.31-41.36) | 47.56<br>(39.38-55.27) | 31.54<br>(31.54-31.54)                                                                                                           | 57.36<br>(57.36-57.36) | 77.13<br>(77.13-77.13) | 52.89<br>(51.31-54.44)                                                                        | 67.17<br>(62.38-72.18) | 87.52<br>(85.84-89.03) | 56.36<br>(49.49-62.67)                                                                                                                  | 59.37<br>(54.22-64.22) | 63.00<br>(58.07-67.81) |
| Qatar        | 37.81<br>(29.56-46.31)                                                                                                                          | 43.45<br>(35.60-51.92) | 66.58<br>(60.53-72.57) | 44.06<br>(44.06-44.06)                                                                                                           | 59.91<br>(59.91-59.91) | 70.81<br>(70.81-70.81) | 52.38<br>(50.62-54.09)                                                                        | 59.58<br>(56.48-63.72) | 85.77<br>(84.05-87.55) | 55.45<br>(50.19-59.96)                                                                                                                  | 55.27<br>(49.88-60.19) | 67.99<br>(62.35-73.74) |
| Saudi Arabia | 35.20<br>(27.57-43.63)                                                                                                                          | 42.21<br>(33.48-50.52) | 59.20<br>(51.43-66.67) | 37.90<br>(37.90-37.90)                                                                                                           | 60.62<br>(60.62-60.62) | 81.35<br>(81.35-81.35) | 51.69<br>(50.06-53.46)                                                                        | 58.72<br>(55.49-64.01) | 84.61<br>(82.73-86.61) | 57.37<br>(53.12-61.80)                                                                                                                  | 59.67<br>(55.63-63.56) | 62.22<br>(57.65-66.53) |
| Sudan        | 8.68<br>(4.05-13.67)                                                                                                                            | 8.50<br>(3.76-13.75)   | 9.11<br>(5.32-13.17)   | 27.09<br>(27.09-27.09)                                                                                                           | 24.97<br>(24.97-24.97) | 38.95<br>(38.95-38.95) | 6.41<br>(4.25-8.60)                                                                           | 14.89<br>(12.82-17.05) | 47.44<br>(43.94-50.64) | 24.44<br>(17.53-30.66)                                                                                                                  | 27.62<br>(19.85-34.47) | 35.88<br>(27.99-43.35) |

**Appendix Table 1a. Scaled values for each SDG health-related indicator and three summary indicators by country for 1990, 2000, and 2015**

| Location             | Indicator 3.7.1: Proportion of women of reproductive age (15 to 49 years) who have their need for family planning satisfied with modern methods |                        |                        | Indicator 3.7.2: Birth rates for women aged 10 to 14 years and women aged 15 to 19 years (number of live births per 1,000 women) |                        |                        | Indicator 3.8.1: Coverage of 7 UHC tracer interventions for prevention and treatment services |                        |                        | Indicator 3.9.1: Age-standardised death rate attributable to household air pollution and ambient air pollution (per 100,000 population) |                        |                        |
|----------------------|-------------------------------------------------------------------------------------------------------------------------------------------------|------------------------|------------------------|----------------------------------------------------------------------------------------------------------------------------------|------------------------|------------------------|-----------------------------------------------------------------------------------------------|------------------------|------------------------|-----------------------------------------------------------------------------------------------------------------------------------------|------------------------|------------------------|
|                      | 1990                                                                                                                                            | 2000                   | 2015                   | 1990                                                                                                                             | 2000                   | 2015                   | 1990                                                                                          | 2000                   | 2015                   | 1990                                                                                                                                    | 2000                   | 2015                   |
| Syria                | 35.14<br>(26.88-43.44)                                                                                                                          | 43.01<br>(34.28-51.28) | 57.01<br>(49.25-64.46) | 36.99<br>(36.99-36.99)                                                                                                           | 43.94<br>(43.94-43.94) | 51.08<br>(51.08-51.08) | 37.97<br>(35.05-40.86)                                                                        | 49.54<br>(47.55-51.40) | 78.17<br>(75.75-80.53) | 51.70<br>(46.65-56.39)                                                                                                                  | 58.17<br>(53.60-62.56) | 59.89<br>(54.98-64.56) |
| Tunisia              | 53.21<br>(45.08-61.17)                                                                                                                          | 62.39<br>(54.75-69.73) | 71.99<br>(64.49-78.17) | 63.23<br>(63.23-63.23)                                                                                                           | 79.65<br>(79.65-79.65) | 81.04<br>(81.04-81.04) | 46.35<br>(44.54-48.09)                                                                        | 56.43<br>(55.28-57.56) | 87.68<br>(85.99-89.53) | 58.58<br>(52.15-63.95)                                                                                                                  | 64.90<br>(60.34-69.30) | 69.06<br>(63.35-75.00) |
| Turkey               | 40.84<br>(34.22-47.71)                                                                                                                          | 49.84<br>(44.13-55.60) | 70.11<br>(62.93-76.47) | 39.26<br>(39.26-39.26)                                                                                                           | 47.45<br>(47.45-47.45) | 61.18<br>(61.18-61.18) | 41.61<br>(40.23-43.08)                                                                        | 47.50<br>(46.20-48.82) | 82.03<br>(80.13-84.08) | 48.49<br>(41.93-54.18)                                                                                                                  | 58.87<br>(54.81-62.50) | 70.69<br>(66.32-74.43) |
| United Arab Emirates | 32.85<br>(25.30-41.14)                                                                                                                          | 43.27<br>(34.75-51.68) | 58.81<br>(50.28-66.38) | 42.69<br>(42.69-42.69)                                                                                                           | 59.26<br>(59.26-59.26) | 58.97<br>(58.97-58.97) | 52.85<br>(51.43-54.46)                                                                        | 57.37<br>(55.17-62.09) | 84.75<br>(82.54-87.08) | 49.02<br>(42.93-54.96)                                                                                                                  | 51.46<br>(46.50-56.50) | 56.19<br>(49.67-62.10) |
| Yemen                | 25.16<br>(18.04-32.77)                                                                                                                          | 30.78<br>(23.13-39.11) | 42.44<br>(35.85-49.26) | 13.90<br>(13.90-13.90)                                                                                                           | 28.79<br>(28.79-28.79) | 42.17<br>(42.17-42.17) | 7.93<br>(6.33-9.70)                                                                           | 14.12<br>(11.82-17.11) | 48.93<br>(43.59-54.75) | 22.56<br>(10.54-34.72)                                                                                                                  | 30.24<br>(17.62-42.52) | 37.42<br>(24.19-49.09) |
| Bangladesh           | 50.39<br>(44.58-56.46)                                                                                                                          | 61.49<br>(57.56-65.42) | 73.25<br>(69.48-76.50) | 15.76<br>(15.76-15.76)                                                                                                           | 26.56<br>(26.56-26.56) | 36.20<br>(36.20-36.20) | 2.17<br>(0.40-4.18)                                                                           | 15.39<br>(13.80-17.51) | 50.32<br>(43.50-56.82) | 28.20<br>(22.59-34.21)                                                                                                                  | 29.52<br>(24.74-34.41) | 30.57<br>(24.87-36.22) |
| Bhutan               | 33.25<br>(25.72-41.39)                                                                                                                          | 40.34<br>(32.43-47.94) | 57.03<br>(51.05-62.65) | 26.18<br>(26.18-26.18)                                                                                                           | 35.37<br>(35.37-35.37) | 65.31<br>(65.31-65.31) | 26.15<br>(21.36-30.68)                                                                        | 38.54<br>(34.34-42.54) | 74.59<br>(70.12-79.11) | 31.26<br>(24.27-38.61)                                                                                                                  | 37.51<br>(31.67-43.36) | 46.98<br>(39.70-54.60) |
| India                | 57.51<br>(54.48-60.26)                                                                                                                          | 65.15<br>(63.01-67.29) | 82.19<br>(77.49-86.24) | 27.58<br>(27.58-27.58)                                                                                                           | 37.34<br>(37.34-37.34) | 55.26<br>(55.26-55.26) | 13.00<br>(10.83-15.15)                                                                        | 18.94<br>(17.15-21.05) | 51.43<br>(44.92-58.89) | 21.09<br>(15.92-26.65)                                                                                                                  | 23.68<br>(18.67-28.87) | 31.33<br>(27.02-36.14) |
| Nepal                | 33.48<br>(27.11-40.84)                                                                                                                          | 46.36<br>(43.53-49.43) | 57.66<br>(52.51-62.44) | 18.89<br>(18.89-18.89)                                                                                                           | 23.52<br>(23.52-23.52) | 38.81<br>(38.81-38.81) | 4.23<br>(2.04-6.57)                                                                           | 14.05<br>(12.56-16.13) | 50.13<br>(43.58-57.35) | 27.32<br>(21.18-33.91)                                                                                                                  | 32.15<br>(27.30-37.11) | 34.99<br>(28.52-41.12) |
| Pakistan             | 13.73<br>(10.73-16.71)                                                                                                                          | 26.05<br>(20.51-31.64) | 44.39<br>(39.82-48.91) | 32.21<br>(32.21-32.21)                                                                                                           | 44.72<br>(44.72-44.72) | 50.39<br>(50.39-50.39) | 6.46<br>(5.05-8.18)                                                                           | 10.69<br>(9.17-12.77)  | 38.62<br>(33.03-44.85) | 28.30<br>(22.56-34.36)                                                                                                                  | 24.36<br>(19.00-29.86) | 30.76<br>(24.95-36.70) |
| Botswana             | 60.08<br>(51.95-67.77)                                                                                                                          | 75.07<br>(68.25-80.86) | 88.08<br>(84.03-91.41) | 29.62<br>(29.62-29.62)                                                                                                           | 42.06<br>(42.06-42.06) | 56.37<br>(56.37-56.37) | 28.66<br>(27.24-30.15)                                                                        | 35.95<br>(32.99-40.01) | 82.15<br>(75.66-89.63) | 31.57<br>(6.95-50.38)                                                                                                                   | 32.79<br>(0.40-55.48)  | 45.75<br>(16.55-65.64) |

**Appendix Table 1a. Scaled values for each SDG health-related indicator and three summary indicators by country for 1990, 2000, and 2015**

| Location      | Indicator 3.7.1: Proportion of women of reproductive age (15 to 49 years) who have their need for family planning satisfied with modern methods |                        |                        | Indicator 3.7.2: Birth rates for women aged 10 to 14 years and women aged 15 to 19 years (number of live births per 1,000 women) |                        |                        | Indicator 3.8.1: Coverage of 7 UHC tracer interventions for prevention and treatment services |                        |                        | Indicator 3.9.1: Age-standardised death rate attributable to household air pollution and ambient air pollution (per 100,000 population) |                        |                        |
|---------------|-------------------------------------------------------------------------------------------------------------------------------------------------|------------------------|------------------------|----------------------------------------------------------------------------------------------------------------------------------|------------------------|------------------------|-----------------------------------------------------------------------------------------------|------------------------|------------------------|-----------------------------------------------------------------------------------------------------------------------------------------|------------------------|------------------------|
|               | 1990                                                                                                                                            | 2000                   | 2015                   | 1990                                                                                                                             | 2000                   | 2015                   | 1990                                                                                          | 2000                   | 2015                   | 1990                                                                                                                                    | 2000                   | 2015                   |
| Lesotho       | 38.81<br>(30.57-47.32)                                                                                                                          | 49.57<br>(42.35-56.78) | 81.19<br>(77.60-84.60) | 32.71<br>(32.71-32.71)                                                                                                           | 31.59<br>(31.59-31.59) | 32.47<br>(32.47-32.47) | 39.65<br>(37.38-41.94)                                                                        | 43.25<br>(41.96-44.62) | 76.03<br>(73.93-78.13) | 31.70<br>(23.62-39.75)                                                                                                                  | 29.44<br>(20.04-38.14) | 25.61<br>(11.70-40.24) |
| Namibia       | 57.13<br>(50.62-63.41)                                                                                                                          | 71.43<br>(66.52-75.42) | 86.50<br>(83.38-89.31) | 27.77<br>(27.77-27.77)                                                                                                           | 35.64<br>(35.64-35.64) | 37.70<br>(37.70-37.70) | 25.87<br>(24.61-27.34)                                                                        | 31.66<br>(30.02-34.23) | 82.18<br>(76.38-86.67) | 26.22<br>(20.53-32.34)                                                                                                                  | 21.83<br>(13.79-30.33) | 42.09<br>(30.20-52.66) |
| South Africa  | 72.70<br>(66.38-78.90)                                                                                                                          | 81.36<br>(77.54-84.80) | 91.41<br>(88.16-93.91) | 33.77<br>(33.77-33.77)                                                                                                           | 42.56<br>(42.56-42.56) | 57.04<br>(57.04-57.04) | 31.60<br>(30.45-33.02)                                                                        | 41.49<br>(40.04-43.46) | 79.04<br>(69.81-87.58) | 34.87<br>(30.57-39.83)                                                                                                                  | 34.16<br>(29.64-39.02) | 51.31<br>(46.84-55.81) |
| Swaziland     | 43.31<br>(34.41-52.91)                                                                                                                          | 56.33<br>(48.72-63.59) | 79.58<br>(73.53-84.60) | 20.82<br>(20.82-20.82)                                                                                                           | 28.86<br>(28.86-28.86) | 40.48<br>(40.48-40.48) | 45.80<br>(43.80-47.84)                                                                        | 50.74<br>(49.56-52.02) | 84.68<br>(82.99-86.45) | 25.48<br>(16.66-34.71)                                                                                                                  | 24.96<br>(13.71-35.30) | 28.63<br>(11.88-46.22) |
| Zimbabwe      | 64.35<br>(58.24-70.43)                                                                                                                          | 74.22<br>(70.47-77.94) | 85.67<br>(82.04-89.08) | 26.36<br>(26.36-26.36)                                                                                                           | 27.98<br>(27.98-27.98) | 27.42<br>(27.42-27.42) | 28.15<br>(27.07-29.51)                                                                        | 33.69<br>(32.55-35.01) | 79.10<br>(76.70-81.38) | 39.01<br>(32.26-46.99)                                                                                                                  | 34.48<br>(21.93-44.71) | 37.86<br>(25.29-50.94) |
| Benin         | 3.35<br>(0.00-9.38)                                                                                                                             | 6.52<br>(2.03-12.04)   | 14.92<br>(6.93-24.59)  | 21.05<br>(21.05-21.05)                                                                                                           | 23.04<br>(23.04-23.04) | 34.29<br>(34.29-34.29) | 16.66<br>(14.66-18.86)                                                                        | 22.38<br>(20.87-24.14) | 64.32<br>(61.00-67.72) | 26.60<br>(20.61-32.81)                                                                                                                  | 25.44<br>(18.73-32.31) | 29.09<br>(14.39-43.35) |
| Burkina Faso  | 4.05<br>(0.00-9.62)                                                                                                                             | 12.49<br>(6.47-19.12)  | 27.75<br>(17.21-40.02) | 16.66<br>(16.66-16.66)                                                                                                           | 18.25<br>(18.25-18.25) | 26.78<br>(26.78-26.78) | 8.79<br>(7.08-10.86)                                                                          | 15.42<br>(13.98-17.10) | 66.14<br>(62.99-69.24) | 27.50<br>(20.99-34.06)                                                                                                                  | 28.39<br>(21.66-34.99) | 33.64<br>(20.56-44.63) |
| Cameroon      | 5.88<br>(0.45-11.74)                                                                                                                            | 17.04<br>(9.99-24.72)  | 33.38<br>(21.93-46.23) | 8.88<br>(8.88-8.88)                                                                                                              | 15.21<br>(15.21-15.21) | 29.32<br>(29.32-29.32) | 15.75<br>(14.35-17.48)                                                                        | 17.55<br>(16.23-19.20) | 58.02<br>(54.10-61.33) | 26.72<br>(20.43-33.09)                                                                                                                  | 22.96<br>(15.27-31.46) | 30.58<br>(16.89-42.59) |
| Cape Verde    | 46.75<br>(31.81-61.42)                                                                                                                          | 59.79<br>(45.93-72.73) | 74.76<br>(62.44-84.25) | 25.68<br>(25.68-25.68)                                                                                                           | 30.41<br>(30.41-30.41) | 41.04<br>(41.04-41.04) | 40.79<br>(38.00-43.59)                                                                        | 45.05<br>(42.77-47.25) | 80.21<br>(77.51-82.77) | 37.87<br>(32.95-42.60)                                                                                                                  | 38.25<br>(30.08-46.01) | 50.49<br>(43.55-57.61) |
| Chad          | 3.65<br>(0.00-10.71)                                                                                                                            | 10.17<br>(4.40-17.34)  | 15.61<br>(5.90-26.34)  | 2.58<br>(2.58-2.58)                                                                                                              | 2.88<br>(2.88-2.88)    | 19.12<br>(19.12-19.12) | 1.30<br>(0.00-3.30)                                                                           | 4.92<br>(3.51-6.68)    | 33.62<br>(29.46-37.49) | 29.02<br>(22.66-35.24)                                                                                                                  | 23.57<br>(16.31-31.05) | 27.33<br>(13.11-41.13) |
| Cote d'Ivoire | 9.97<br>(2.93-18.38)                                                                                                                            | 16.11<br>(8.57-24.61)  | 25.56<br>(15.39-36.47) | 15.08<br>(15.08-15.08)                                                                                                           | 20.02<br>(20.02-20.02) | 20.43<br>(20.43-20.43) | 14.05<br>(12.49-15.82)                                                                        | 20.00<br>(18.57-21.71) | 58.98<br>(56.19-61.76) | 26.14<br>(19.60-32.44)                                                                                                                  | 23.11<br>(14.61-31.24) | 31.34<br>(18.90-42.97) |

**Appendix Table 1a. Scaled values for each SDG health-related indicator and three summary indicators by country for 1990, 2000, and 2015**

| Location              | Indicator 3.7.1: Proportion of women of reproductive age (15 to 49 years) who have their need for family planning satisfied with modern methods |                        |                        | Indicator 3.7.2: Birth rates for women aged 10 to 14 years and women aged 15 to 19 years (number of live births per 1,000 women) |                        |                        | Indicator 3.8.1: Coverage of 7 UHC tracer interventions for prevention and treatment services |                        |                        | Indicator 3.9.1: Age-standardised death rate attributable to household air pollution and ambient air pollution (per 100,000 population) |                        |                        |
|-----------------------|-------------------------------------------------------------------------------------------------------------------------------------------------|------------------------|------------------------|----------------------------------------------------------------------------------------------------------------------------------|------------------------|------------------------|-----------------------------------------------------------------------------------------------|------------------------|------------------------|-----------------------------------------------------------------------------------------------------------------------------------------|------------------------|------------------------|
|                       | 1990                                                                                                                                            | 2000                   | 2015                   | 1990                                                                                                                             | 2000                   | 2015                   | 1990                                                                                          | 2000                   | 2015                   | 1990                                                                                                                                    | 2000                   | 2015                   |
| The Gambia            | 16.37<br>(7.01-27.94)                                                                                                                           | 17.57<br>(7.22-29.01)  | 20.10<br>(11.35-30.07) | 14.46<br>(14.46-14.46)                                                                                                           | 22.40<br>(22.40-22.40) | 25.54<br>(25.54-25.54) | 22.53<br>(20.34-24.67)                                                                        | 26.01<br>(24.06-27.91) | 64.87<br>(61.78-68.14) | 28.32<br>(14.84-40.00)                                                                                                                  | 30.32<br>(23.45-37.63) | 34.65<br>(24.83-44.34) |
| Ghana                 | 16.88<br>(9.16-25.50)                                                                                                                           | 24.08<br>(17.89-31.06) | 30.61<br>(25.58-35.60) | 26.45<br>(26.45-26.45)                                                                                                           | 35.47<br>(35.47-35.47) | 41.09<br>(41.09-41.09) | 16.59<br>(15.06-18.33)                                                                        | 22.52<br>(21.33-24.07) | 67.11<br>(64.77-69.02) | 24.68<br>(14.76-34.17)                                                                                                                  | 27.78<br>(19.92-35.90) | 34.47<br>(20.32-48.26) |
| Guinea                | 8.56<br>(1.39-17.88)                                                                                                                            | 11.23<br>(4.84-18.36)  | 17.70<br>(9.07-27.24)  | 9.20<br>(9.20-9.20)                                                                                                              | 12.87<br>(12.87-12.87) | 20.46<br>(20.46-20.46) | 7.56<br>(5.57-9.62)                                                                           | 12.81<br>(11.38-14.56) | 47.74<br>(44.08-51.12) | 25.67<br>(19.47-31.94)                                                                                                                  | 25.22<br>(19.07-31.37) | 27.32<br>(16.03-38.43) |
| Guinea-Bissau         | 10.27<br>(2.22-20.36)                                                                                                                           | 14.36<br>(4.93-26.06)  | 20.19<br>(9.73-32.68)  | 18.99<br>(18.99-18.99)                                                                                                           | 21.50<br>(21.50-21.50) | 33.26<br>(33.26-33.26) | 13.58<br>(11.20-16.01)                                                                        | 16.23<br>(13.84-18.48) | 51.79<br>(47.96-55.64) | 24.44<br>(2.10-43.21)                                                                                                                   | 24.45<br>(1.12-44.01)  | 26.29<br>(0.00-45.52)  |
| Liberia               | 19.02<br>(8.64-31.31)                                                                                                                           | 18.34<br>(9.46-29.14)  | 33.67<br>(22.96-45.15) | 12.30<br>(12.30-12.30)                                                                                                           | 18.31<br>(18.31-18.31) | 27.83<br>(27.83-27.83) | 14.82<br>(12.54-17.16)                                                                        | 16.00<br>(14.14-18.02) | 57.68<br>(52.99-62.32) | 30.65<br>(22.65-38.32)                                                                                                                  | 36.10<br>(29.58-43.16) | 38.32<br>(28.21-49.21) |
| Mali                  | 8.88<br>(1.76-17.63)                                                                                                                            | 11.15<br>(5.51-17.89)  | 20.46<br>(11.53-30.69) | 6.47<br>(6.47-6.47)                                                                                                              | 8.44<br>(8.44-8.44)    | 11.87<br>(11.87-11.87) | 7.27<br>(5.55-9.30)                                                                           | 13.63<br>(12.17-15.34) | 47.20<br>(43.55-50.71) | 30.48<br>(24.70-36.18)                                                                                                                  | 33.81<br>(28.01-39.44) | 38.55<br>(26.83-48.48) |
| Mauritania            | 5.24<br>(0.00-13.14)                                                                                                                            | 5.56<br>(0.78-11.53)   | 7.87<br>(0.41-16.83)   | 27.59<br>(27.59-27.59)                                                                                                           | 31.04<br>(31.04-31.04) | 37.57<br>(37.57-37.57) | 8.75<br>(6.55-11.20)                                                                          | 14.70<br>(13.01-16.73) | 41.02<br>(36.83-45.00) | 27.34<br>(21.05-34.03)                                                                                                                  | 32.47<br>(26.08-39.40) | 41.53<br>(29.74-52.66) |
| Niger                 | 5.35<br>(0.07-11.83)                                                                                                                            | 15.22<br>(8.34-23.48)  | 28.87<br>(18.37-40.91) | 1.91<br>(1.91-1.91)                                                                                                              | 2.47<br>(2.47-2.47)    | 5.10<br>(5.10-5.10)    | 1.21<br>(0.00-3.01)                                                                           | 6.23<br>(4.85-8.01)    | 45.90<br>(42.93-49.30) | 21.53<br>(15.20-28.35)                                                                                                                  | 24.79<br>(18.21-31.72) | 29.91<br>(18.49-40.31) |
| Nigeria               | 9.62<br>(3.50-16.42)                                                                                                                            | 19.99<br>(11.70-30.57) | 32.48<br>(22.16-43.45) | 16.91<br>(16.91-16.91)                                                                                                           | 20.94<br>(20.94-20.94) | 26.45<br>(26.45-26.45) | 6.72<br>(5.19-8.69)                                                                           | 8.68<br>(7.14-10.51)   | 40.37<br>(37.57-43.31) | 24.70<br>(13.77-34.79)                                                                                                                  | 29.08<br>(21.40-36.60) | 42.31<br>(30.54-51.27) |
| Sao Tome and Principe | 15.62<br>(6.42-26.55)                                                                                                                           | 22.44<br>(10.79-36.02) | 34.27<br>(20.79-48.34) | 23.09<br>(23.09-23.09)                                                                                                           | 27.79<br>(27.79-27.79) | 34.66<br>(34.66-34.66) | 22.58<br>(20.76-24.54)                                                                        | 39.64<br>(36.42-43.06) | 77.89<br>(71.28-83.64) | 28.54<br>(22.62-34.40)                                                                                                                  | 27.85<br>(21.32-35.21) | 35.34<br>(22.54-48.70) |
| Senegal               | 8.75<br>(2.95-15.29)                                                                                                                            | 13.45<br>(7.07-20.69)  | 32.21<br>(23.40-40.97) | 19.92<br>(19.92-19.92)                                                                                                           | 27.43<br>(27.43-27.43) | 36.33<br>(36.33-36.33) | 13.22<br>(11.66-15.09)                                                                        | 20.75<br>(19.25-22.47) | 68.16<br>(65.55-70.57) | 32.70<br>(26.48-38.54)                                                                                                                  | 34.81<br>(28.78-41.23) | 35.69<br>(21.60-49.20) |

**Appendix Table 1a. Scaled values for each SDG health-related indicator and three summary indicators by country for 1990, 2000, and 2015**

| Location     | Indicator 3.7.1: Proportion of women of reproductive age (15 to 49 years) who have their need for family planning satisfied with modern methods |                        |                        | Indicator 3.7.2: Birth rates for women aged 10 to 14 years and women aged 15 to 19 years (number of live births per 1,000 women) |                        |                        | Indicator 3.8.1: Coverage of 7 UHC tracer interventions for prevention and treatment services |                        |                        | Indicator 3.9.1: Age-standardised death rate attributable to household air pollution and ambient air pollution (per 100,000 population) |                        |                        |
|--------------|-------------------------------------------------------------------------------------------------------------------------------------------------|------------------------|------------------------|----------------------------------------------------------------------------------------------------------------------------------|------------------------|------------------------|-----------------------------------------------------------------------------------------------|------------------------|------------------------|-----------------------------------------------------------------------------------------------------------------------------------------|------------------------|------------------------|
|              | 1990                                                                                                                                            | 2000                   | 2015                   | 1990                                                                                                                             | 2000                   | 2015                   | 1990                                                                                          | 2000                   | 2015                   | 1990                                                                                                                                    | 2000                   | 2015                   |
| Sierra Leone | 11.23<br>(3.04-21.76)                                                                                                                           | 15.98<br>(7.14-27.26)  | 34.83<br>(23.99-45.28) | 11.21<br>(11.21-11.21)                                                                                                           | 13.59<br>(13.59-13.59) | 25.33<br>(25.33-25.33) | 13.28<br>(11.24-15.72)                                                                        | 15.92<br>(14.07-17.93) | 63.51<br>(60.72-66.13) | 26.50<br>(17.44-35.48)                                                                                                                  | 25.55<br>(19.01-31.84) | 27.96<br>(16.75-39.09) |
| Togo         | 7.37<br>(0.73-16.19)                                                                                                                            | 11.49<br>(4.87-19.63)  | 29.68<br>(20.08-41.07) | 24.11<br>(24.11-24.11)                                                                                                           | 30.41<br>(30.41-30.41) | 31.90<br>(31.90-31.90) | 16.18<br>(14.48-18.16)                                                                        | 20.28<br>(18.74-21.99) | 65.02<br>(62.37-67.81) | 26.78<br>(19.48-33.20)                                                                                                                  | 24.95<br>(17.05-32.90) | 30.33<br>(18.47-41.56) |
| Burundi      | 18.16<br>(8.65-29.18)                                                                                                                           | 22.83<br>(12.40-34.28) | 29.12<br>(17.84-41.79) | 41.85<br>(41.85-41.85)                                                                                                           | 45.38<br>(45.38-45.38) | 52.85<br>(52.85-52.85) | 15.38<br>(13.04-17.77)                                                                        | 19.37<br>(17.21-21.65) | 65.19<br>(61.08-69.04) | 11.99<br>(2.23-23.88)                                                                                                                   | 17.60<br>(10.23-25.58) | 31.13<br>(18.51-43.59) |
| Comoros      | 21.19<br>(11.97-32.10)                                                                                                                          | 23.39<br>(13.95-34.92) | 24.82<br>(14.92-35.27) | 25.85<br>(25.85-25.85)                                                                                                           | 31.61<br>(31.61-31.61) | 40.17<br>(40.17-40.17) | 19.02<br>(16.93-21.19)                                                                        | 24.96<br>(23.25-26.75) | 59.34<br>(54.84-64.33) | 26.19<br>(14.12-38.14)                                                                                                                  | 32.85<br>(26.14-40.06) | 42.40<br>(31.90-52.83) |
| Djibouti     | 14.19<br>(5.55-24.21)                                                                                                                           | 18.83<br>(9.45-30.61)  | 27.16<br>(16.66-39.43) | 48.81<br>(48.81-48.81)                                                                                                           | 57.59<br>(57.59-57.59) | 67.44<br>(67.44-67.44) | 22.27<br>(18.90-25.18)                                                                        | 26.96<br>(24.09-29.76) | 61.05<br>(55.10-66.06) | 43.79<br>(30.87-54.97)                                                                                                                  | 45.30<br>(30.63-59.75) | 46.47<br>(30.27-60.90) |
| Eritrea      | 6.91<br>(0.80-14.72)                                                                                                                            | 10.07<br>(3.87-17.41)  | 15.31<br>(6.73-26.14)  | 27.60<br>(27.60-27.60)                                                                                                           | 31.79<br>(31.79-31.79) | 44.62<br>(44.62-44.62) | 8.86<br>(6.69-11.19)                                                                          | 19.62<br>(18.03-21.54) | 46.10<br>(38.92-52.97) | 20.80<br>(13.78-27.87)                                                                                                                  | 32.13<br>(20.41-45.92) | 31.43<br>(14.93-46.69) |
| Ethiopia     | 14.00<br>(5.18-24.21)                                                                                                                           | 21.20<br>(12.64-30.50) | 53.77<br>(44.67-62.15) | 22.28<br>(22.28-22.28)                                                                                                           | 24.58<br>(24.58-24.58) | 43.11<br>(43.11-43.11) | 4.59<br>(2.22-6.93)                                                                           | 7.93<br>(6.35-9.77)    | 43.53<br>(38.58-48.30) | 18.76<br>(12.68-25.30)                                                                                                                  | 26.47<br>(20.13-32.77) | 37.72<br>(25.90-49.05) |
| Kenya        | 35.68<br>(26.35-45.63)                                                                                                                          | 44.50<br>(36.12-52.57) | 71.67<br>(66.68-76.50) | 20.65<br>(20.65-20.65)                                                                                                           | 26.79<br>(26.79-26.79) | 30.41<br>(30.41-30.41) | 22.97<br>(21.59-24.60)                                                                        | 26.59<br>(25.36-28.10) | 71.29<br>(66.57-75.38) | 40.75<br>(35.83-45.93)                                                                                                                  | 42.59<br>(37.50-47.64) | 46.53<br>(41.27-52.11) |
| Madagascar   | 7.25<br>(1.33-14.20)                                                                                                                            | 19.79<br>(12.28-28.77) | 37.45<br>(25.34-50.93) | 16.12<br>(16.12-16.12)                                                                                                           | 16.00<br>(16.00-16.00) | 25.53<br>(25.53-25.53) | 13.41<br>(11.97-15.18)                                                                        | 17.16<br>(15.78-18.81) | 39.01<br>(35.56-42.86) | 24.07<br>(18.20-30.32)                                                                                                                  | 25.37<br>(19.16-32.41) | 28.81<br>(16.73-41.40) |
| Malawi       | 15.30<br>(7.18-24.33)                                                                                                                           | 34.03<br>(23.83-44.62) | 59.11<br>(47.33-69.92) | 12.71<br>(12.71-12.71)                                                                                                           | 13.22<br>(13.22-13.22) | 19.97<br>(19.97-19.97) | 22.47<br>(20.91-24.16)                                                                        | 27.75<br>(26.44-29.25) | 73.17<br>(69.77-76.42) | 31.15<br>(23.72-38.66)                                                                                                                  | 28.74<br>(18.49-38.03) | 39.83<br>(27.79-50.36) |
| Mozambique   | 16.46<br>(7.86-26.53)                                                                                                                           | 26.70<br>(17.16-36.67) | 37.70<br>(25.72-50.62) | 6.96<br>(6.96-6.96)                                                                                                              | 9.56<br>(9.56-9.56)    | 19.90<br>(19.90-19.90) | 11.78<br>(9.67-13.94)                                                                         | 19.65<br>(18.29-21.26) | 58.96<br>(55.83-61.89) | 34.43<br>(28.40-40.83)                                                                                                                  | 34.14<br>(26.71-41.88) | 37.24<br>(23.46-50.68) |

**Appendix Table 1a. Scaled values for each SDG health-related indicator and three summary indicators by country for 1990, 2000, and 2015**

| Location                         | Indicator 3.7.1: Proportion of women of reproductive age (15 to 49 years) who have their need for family planning satisfied with modern methods |                        |                        | Indicator 3.7.2: Birth rates for women aged 10 to 14 years and women aged 15 to 19 years (number of live births per 1,000 women) |                        |                        | Indicator 3.8.1: Coverage of 7 UHC tracer interventions for prevention and treatment services |                        |                        | Indicator 3.9.1: Age-standardised death rate attributable to household air pollution and ambient air pollution (per 100,000 population) |                        |                        |
|----------------------------------|-------------------------------------------------------------------------------------------------------------------------------------------------|------------------------|------------------------|----------------------------------------------------------------------------------------------------------------------------------|------------------------|------------------------|-----------------------------------------------------------------------------------------------|------------------------|------------------------|-----------------------------------------------------------------------------------------------------------------------------------------|------------------------|------------------------|
|                                  | 1990                                                                                                                                            | 2000                   | 2015                   | 1990                                                                                                                             | 2000                   | 2015                   | 1990                                                                                          | 2000                   | 2015                   | 1990                                                                                                                                    | 2000                   | 2015                   |
| Rwanda                           | 11.77<br>(4.95-19.95)                                                                                                                           | 11.14<br>(5.22-18.51)  | 53.27<br>(42.59-64.00) | 38.37<br>(38.37-38.37)                                                                                                           | 44.70<br>(44.70-44.70) | 58.58<br>(58.58-58.58) | 15.02<br>(13.21-17.05)                                                                        | 17.76<br>(16.06-19.67) | 76.73<br>(72.87-80.07) | 17.70<br>(10.80-25.24)                                                                                                                  | 19.83<br>(12.89-27.85) | 36.13<br>(23.93-47.08) |
| Somalia                          | 9.89<br>(2.17-19.23)                                                                                                                            | 12.41<br>(4.26-21.96)  | 15.32<br>(6.34-26.15)  | 31.04<br>(31.04-31.04)                                                                                                           | 21.16<br>(21.16-21.16) | 26.93<br>(26.93-26.93) | 0.49<br>(0.00-2.31)                                                                           | 1.37<br>(0.16-2.89)    | 16.04<br>(11.53-21.17) | 22.72<br>(3.00-42.57)                                                                                                                   | 24.56<br>(5.44-45.84)  | 27.73<br>(6.95-48.31)  |
| South Sudan                      | 13.67<br>(5.11-23.73)                                                                                                                           | 17.68<br>(7.42-28.38)  | 23.86<br>(13.61-36.42) | 18.74<br>(18.74-18.74)                                                                                                           | 22.18<br>(22.18-22.18) | 40.78<br>(40.78-40.78) | 10.62<br>(7.26-14.06)                                                                         | 10.81<br>(8.02-13.55)  | 26.79<br>(22.21-31.57) | 26.49<br>(4.97-45.67)                                                                                                                   | 30.91<br>(7.63-50.87)  | 32.18<br>(7.18-51.97)  |
| Tanzania                         | 18.76<br>(10.52-27.92)                                                                                                                          | 32.41<br>(23.58-41.33) | 47.92<br>(35.91-60.23) | 17.35<br>(17.35-17.35)                                                                                                           | 19.99<br>(19.99-19.99) | 23.66<br>(23.66-23.66) | 17.61<br>(16.14-19.35)                                                                        | 21.40<br>(20.06-23.00) | 57.40<br>(53.39-61.09) | 30.12<br>(23.81-36.26)                                                                                                                  | 33.22<br>(25.97-40.80) | 38.73<br>(24.36-50.94) |
| Uganda                           | 15.61<br>(7.73-24.81)                                                                                                                           | 24.84<br>(18.48-31.81) | 40.86<br>(34.92-47.11) | 6.85<br>(6.85-6.85)                                                                                                              | 8.66<br>(8.66-8.66)    | 23.92<br>(23.92-23.92) | 15.06<br>(13.40-16.89)                                                                        | 19.97<br>(18.70-21.48) | 69.06<br>(66.19-71.66) | 25.76<br>(17.95-35.48)                                                                                                                  | 25.10<br>(17.52-33.95) | 32.72<br>(19.17-46.63) |
| Zambia                           | 18.17<br>(10.09-27.72)                                                                                                                          | 31.45<br>(23.00-41.70) | 59.42<br>(48.72-69.78) | 12.23<br>(12.23-12.23)                                                                                                           | 17.75<br>(17.75-17.75) | 30.77<br>(30.77-30.77) | 21.33<br>(19.85-23.01)                                                                        | 25.96<br>(24.60-27.57) | 76.35<br>(73.83-78.76) | 29.35<br>(22.26-36.20)                                                                                                                  | 23.32<br>(15.81-30.08) | 29.16<br>(18.34-40.10) |
| Angola                           | 8.39<br>(0.84-18.00)                                                                                                                            | 11.53<br>(3.65-21.96)  | 16.60<br>(6.80-27.85)  | 0.00<br>(0.00-0.00)                                                                                                              | 3.16<br>(3.16-3.16)    | 12.89<br>(12.89-12.89) | 11.63<br>(9.45-14.06)                                                                         | 17.83<br>(16.01-19.80) | 59.57<br>(55.84-63.09) | 16.77<br>(0.00-39.54)                                                                                                                   | 21.44<br>(1.03-44.14)  | 30.36<br>(3.94-49.70)  |
| Central African Republic         | 4.22<br>(0.00-9.75)                                                                                                                             | 5.69<br>(0.00-13.03)   | 9.20<br>(1.88-18.29)   | 16.43<br>(16.43-16.43)                                                                                                           | 22.29<br>(22.29-22.29) | 32.79<br>(32.79-32.79) | 9.22<br>(7.67-11.05)                                                                          | 11.87<br>(10.40-13.72) | 44.84<br>(40.87-49.29) | 12.00<br>(5.19-19.69)                                                                                                                   | 12.84<br>(1.08-28.07)  | 14.61<br>(0.72-32.76)  |
| Congo                            | 11.95<br>(3.20-22.38)                                                                                                                           | 15.62<br>(7.54-25.96)  | 34.07<br>(23.58-44.67) | 21.28<br>(21.28-21.28)                                                                                                           | 20.64<br>(20.64-20.64) | 24.15<br>(24.15-24.15) | 21.03<br>(18.91-22.94)                                                                        | 24.43<br>(22.65-26.22) | 66.64<br>(61.79-70.88) | 14.15<br>(6.13-23.06)                                                                                                                   | 16.37<br>(8.45-24.00)  | 28.14<br>(14.94-40.50) |
| Democratic Republic of the Congo | 8.59<br>(1.12-17.90)                                                                                                                            | 10.08<br>(2.71-19.26)  | 13.84<br>(7.76-21.01)  | 18.70<br>(18.70-18.70)                                                                                                           | 19.85<br>(19.85-19.85) | 22.75<br>(22.75-22.75) | 11.27<br>(8.90-13.67)                                                                         | 14.78<br>(12.75-16.95) | 56.18<br>(53.15-59.17) | 25.20<br>(14.81-35.17)                                                                                                                  | 25.41<br>(17.47-32.30) | 26.90<br>(15.89-37.77) |
| Equatorial Guinea                | 8.83<br>(1.54-18.53)                                                                                                                            | 12.94<br>(4.42-22.83)  | 20.82<br>(10.33-34.24) | 19.09<br>(19.09-19.09)                                                                                                           | 20.31<br>(20.31-20.31) | 26.68<br>(26.68-26.68) | 17.42<br>(15.02-19.75)                                                                        | 21.04<br>(18.83-23.30) | 58.50<br>(51.60-64.65) | 13.25<br>(0.00-38.69)                                                                                                                   | 22.74<br>(0.92-43.95)  | 34.62<br>(7.71-49.79)  |

**Appendix Table 1a. Scaled values for each SDG health-related indicator and three summary indicators by country for 1990, 2000, and 2015**

| Location | Indicator 3.7.1: Proportion of women of reproductive age (15 to 49 years) who have their need for family planning satisfied with modern methods |                        |                        | Indicator 3.7.2: Birth rates for women aged 10 to 14 years and women aged 15 to 19 years (number of live births per 1,000 women) |                        |                        | Indicator 3.8.1: Coverage of 7 UHC tracer interventions for prevention and treatment services |                        |                        | Indicator 3.9.1: Age-standardised death rate attributable to household air pollution and ambient air pollution (per 100,000 population) |                        |                        |
|----------|-------------------------------------------------------------------------------------------------------------------------------------------------|------------------------|------------------------|----------------------------------------------------------------------------------------------------------------------------------|------------------------|------------------------|-----------------------------------------------------------------------------------------------|------------------------|------------------------|-----------------------------------------------------------------------------------------------------------------------------------------|------------------------|------------------------|
|          | 1990                                                                                                                                            | 2000                   | 2015                   | 1990                                                                                                                             | 2000                   | 2015                   | 1990                                                                                          | 2000                   | 2015                   | 1990                                                                                                                                    | 2000                   | 2015                   |
| Gabon    | 16.00<br>(6.65-27.00)                                                                                                                           | 21.74<br>(14.60-29.32) | 41.18<br>(29.48-51.36) | 9.06<br>(9.06-9.06)                                                                                                              | 18.61<br>(18.61-18.61) | 32.20<br>(32.20-32.20) | 22.32<br>(20.49-24.26)                                                                        | 21.02<br>(19.29-22.78) | 61.38<br>(55.02-67.55) | 26.68<br>(19.66-34.57)                                                                                                                  | 32.99<br>(26.46-40.46) | 49.91<br>(38.25-59.87) |

**Appendix Table 1a. Scaled values for each SDG health-related indicator and three summary indicators by country for 1990, 2000, and 2015**

| Location      | Indicator 3.9.2: Age-standardised death rate attributable to unsafe water, sanitation, and hygiene (WaSH) (per 100,000 population) |                        |                         | Indicator 3.9.3: Age-standardised death rate due to unintentional poisonings (per 100,000 population) |                        |                         | Indicator 3.a.1: Age-standardised prevalence of daily smoking among populations aged 10 and older |                        |                        | Indicator 5.2.1: Prevalence of women aged 15 years and older who experienced intimate partner violence |                        |                        |
|---------------|------------------------------------------------------------------------------------------------------------------------------------|------------------------|-------------------------|-------------------------------------------------------------------------------------------------------|------------------------|-------------------------|---------------------------------------------------------------------------------------------------|------------------------|------------------------|--------------------------------------------------------------------------------------------------------|------------------------|------------------------|
|               | 1990                                                                                                                               | 2000                   | 2015                    | 1990                                                                                                  | 2000                   | 2015                    | 1990                                                                                              | 2000                   | 2015                   | 1990                                                                                                   | 2000                   | 2015                   |
| Canada        | 81.62<br>(78.89-84.32)                                                                                                             | 85.51<br>(83.04-87.84) | 88.50<br>(85.62-92.41)  | 60.97<br>(57.66-65.63)                                                                                | 67.54<br>(64.55-71.55) | 70.78<br>(67.18-74.87)  | 38.04<br>(34.18-42.01)                                                                            | 53.34<br>(50.50-56.45) | 68.50<br>(64.54-71.92) | 72.06<br>(65.74-77.47)                                                                                 | 72.86<br>(68.01-77.20) | 73.82<br>(67.72-79.42) |
| United States | 79.47<br>(77.09-82.03)                                                                                                             | 80.42<br>(78.28-82.59) | 84.09<br>(81.95-86.35)  | 60.20<br>(56.79-64.45)                                                                                | 61.56<br>(58.28-65.93) | 56.80<br>(53.24-61.53)  | 47.34<br>(44.64-50.14)                                                                            | 56.83<br>(54.67-59.08) | 69.50<br>(67.93-71.16) | 71.86<br>(65.93-77.49)                                                                                 | 71.11<br>(65.02-76.51) | 70.41<br>(63.68-76.23) |
| Australia     | 89.05<br>(86.62-91.51)                                                                                                             | 89.14<br>(86.78-91.50) | 95.28<br>(92.47-98.01)  | 71.14<br>(68.03-74.87)                                                                                | 71.54<br>(68.47-75.36) | 74.11<br>(70.63-78.39)  | 42.73<br>(39.58-46.03)                                                                            | 52.77<br>(49.93-55.54) | 66.03<br>(63.45-68.55) | 77.75<br>(72.54-82.58)                                                                                 | 79.08<br>(75.02-82.74) | 77.55<br>(72.67-82.29) |
| New Zealand   | 74.31<br>(71.66-77.28)                                                                                                             | 90.04<br>(87.48-92.56) | 95.29<br>(92.53-97.81)  | 76.18<br>(73.45-79.25)                                                                                | 81.34<br>(79.03-84.09) | 81.10<br>(78.29-85.04)  | 43.40<br>(40.42-46.48)                                                                            | 47.51<br>(44.48-50.67) | 63.20<br>(60.72-65.68) | 67.01<br>(59.27-73.97)                                                                                 | 64.11<br>(56.67-70.70) | 67.01<br>(59.27-73.97) |
| Brunei        | 70.16<br>(62.74-74.68)                                                                                                             | 74.40<br>(67.30-78.77) | 76.30<br>(70.89-80.21)  | 70.39<br>(66.89-73.69)                                                                                | 75.83<br>(73.14-78.34) | 78.68<br>(75.41-81.79)  | 65.40<br>(61.64-68.74)                                                                            | 69.68<br>(67.02-72.54) | 71.97<br>(69.08-74.94) | 67.36<br>(60.52-73.77)                                                                                 | 67.36<br>(60.52-73.77) | 67.36<br>(60.52-73.77) |
| Japan         | 66.52<br>(63.86-69.40)                                                                                                             | 70.52<br>(67.97-73.25) | 75.38<br>(72.73-78.21)  | 72.32<br>(68.95-75.81)                                                                                | 75.58<br>(72.87-78.83) | 76.76<br>(73.94-80.58)  | 29.05<br>(25.59-32.58)                                                                            | 33.30<br>(29.95-36.98) | 57.20<br>(55.05-59.58) | 68.42<br>(61.92-74.39)                                                                                 | 68.28<br>(61.95-74.44) | 68.42<br>(61.92-74.39) |
| Singapore     | 52.86<br>(49.52-56.25)                                                                                                             | 57.20<br>(53.92-60.65) | 62.09<br>(58.90-65.60)  | 79.56<br>(76.90-82.43)                                                                                | 93.38<br>(90.96-95.44) | 99.89<br>(98.95-100.00) | 67.00<br>(63.51-70.15)                                                                            | 72.36<br>(70.27-74.55) | 72.17<br>(69.18-74.85) | 67.36<br>(60.52-73.77)                                                                                 | 67.36<br>(60.52-73.77) | 67.36<br>(60.52-73.77) |
| South Korea   | 70.73<br>(68.18-73.36)                                                                                                             | 80.39<br>(77.71-82.73) | 82.80<br>(80.04-85.31)  | 29.38<br>(26.40-33.24)                                                                                | 55.36<br>(50.68-59.71) | 67.85<br>(63.75-72.11)  | 22.76<br>(18.28-27.64)                                                                            | 35.05<br>(30.60-39.45) | 49.02<br>(45.18-52.86) | 67.36<br>(60.52-73.77)                                                                                 | 67.36<br>(60.52-73.77) | 67.36<br>(60.52-73.77) |
| Andorra       | 80.10<br>(72.92-86.24)                                                                                                             | 83.74<br>(77.80-89.77) | 88.97<br>(83.11-94.51)  | 73.88<br>(67.10-82.28)                                                                                | 80.31<br>(73.79-87.40) | 84.25<br>(76.83-89.63)  | 36.70<br>(30.53-42.56)                                                                            | 39.22<br>(33.89-44.50) | 48.14<br>(42.75-53.22) | 83.26<br>(78.96-87.19)                                                                                 | 83.26<br>(78.96-87.19) | 83.26<br>(78.96-87.19) |
| Austria       | 85.59<br>(82.85-88.44)                                                                                                             | 90.01<br>(87.25-92.89) | 98.65<br>(96.22-100.00) | 70.69<br>(67.57-74.34)                                                                                | 81.75<br>(78.49-84.41) | 80.40<br>(77.43-83.69)  | 36.63<br>(31.47-41.45)                                                                            | 33.39<br>(28.46-38.33) | 36.54<br>(31.33-41.81) | 92.70<br>(90.76-94.31)                                                                                 | 92.70<br>(90.76-94.31) | 92.80<br>(90.92-94.35) |
| Belgium       | 76.50<br>(73.90-79.05)                                                                                                             | 72.59<br>(69.82-75.25) | 78.35<br>(75.57-81.07)  | 57.25<br>(53.84-61.49)                                                                                | 68.96<br>(64.89-72.84) | 75.62<br>(72.16-79.29)  | 35.53<br>(31.14-39.85)                                                                            | 39.74<br>(35.19-44.53) | 54.96<br>(51.16-58.74) | 77.95<br>(72.50-82.29)                                                                                 | 77.95<br>(72.50-82.29) | 78.17<br>(73.34-82.23) |

**Appendix Table 1a. Scaled values for each SDG health-related indicator and three summary indicators by country for 1990, 2000, and 2015**

| Location   | Indicator 3.9.2: Age-standardised death rate attributable to unsafe water, sanitation, and hygiene (WaSH) (per 100,000 population) |                        |                         | Indicator 3.9.3: Age-standardised death rate due to unintentional poisonings (per 100,000 population) |                        |                        | Indicator 3.a.1: Age-standardised prevalence of daily smoking among populations aged 10 and older |                        |                        | Indicator 5.2.1: Prevalence of women aged 15 years and older who experienced intimate partner violence |                         |                         |
|------------|------------------------------------------------------------------------------------------------------------------------------------|------------------------|-------------------------|-------------------------------------------------------------------------------------------------------|------------------------|------------------------|---------------------------------------------------------------------------------------------------|------------------------|------------------------|--------------------------------------------------------------------------------------------------------|-------------------------|-------------------------|
|            | 1990                                                                                                                               | 2000                   | 2015                    | 1990                                                                                                  | 2000                   | 2015                   | 1990                                                                                              | 2000                   | 2015                   | 1990                                                                                                   | 2000                    | 2015                    |
| Cyprus     | 73.66<br>(70.11-76.71)                                                                                                             | 81.64<br>(78.77-84.24) | 92.32<br>(88.31-95.48)  | 70.87<br>(67.77-74.37)                                                                                | 74.88<br>(72.30-77.50) | 83.75<br>(80.64-86.47) | 45.17<br>(39.42-50.84)                                                                            | 37.22<br>(31.50-42.53) | 38.53<br>(33.49-44.12) | 91.87<br>(89.85-93.68)                                                                                 | 91.87<br>(89.85-93.68)  | 92.07<br>(90.01-93.62)  |
| Denmark    | 77.85<br>(75.33-80.19)                                                                                                             | 79.57<br>(77.12-81.68) | 79.59<br>(76.95-82.40)  | 41.48<br>(38.08-48.09)                                                                                | 67.13<br>(63.95-70.93) | 72.98<br>(69.59-76.85) | 13.73<br>(8.57-18.90)                                                                             | 29.75<br>(25.36-34.27) | 60.04<br>(56.69-63.36) | 66.02<br>(58.42-72.85)                                                                                 | 67.11<br>(61.07-73.20)  | 66.07<br>(59.07-71.50)  |
| Finland    | 69.87<br>(67.04-72.64)                                                                                                             | 76.51<br>(73.79-79.23) | 99.83<br>(98.10-100.00) | 30.65<br>(27.48-40.86)                                                                                | 66.77<br>(62.09-70.70) | 72.57<br>(68.19-76.27) | 46.57<br>(43.21-50.09)                                                                            | 49.87<br>(47.14-52.55) | 58.71<br>(54.68-62.55) | 71.14<br>(64.32-76.91)                                                                                 | 70.77<br>(64.75-75.58)  | 70.58<br>(64.72-75.59)  |
| France     | 76.68<br>(74.20-79.15)                                                                                                             | 75.63<br>(73.17-77.94) | 83.33<br>(80.85-85.68)  | 61.09<br>(57.44-65.38)                                                                                | 64.83<br>(61.34-68.87) | 71.18<br>(67.51-75.03) | 25.31<br>(20.06-30.29)                                                                            | 30.03<br>(24.83-35.05) | 43.89<br>(38.72-49.12) | 88.59<br>(85.73-90.92)                                                                                 | 88.93<br>(86.38-91.38)  | 87.46<br>(84.18-90.02)  |
| Germany    | 81.91<br>(79.43-84.64)                                                                                                             | 83.15<br>(80.56-85.78) | 84.20<br>(81.68-87.16)  | 63.48<br>(60.39-67.70)                                                                                | 88.91<br>(85.19-91.12) | 93.87<br>(91.77-95.88) | 36.80<br>(32.44-41.12)                                                                            | 39.39<br>(35.47-43.16) | 46.46<br>(41.42-50.75) | 69.95<br>(62.63-76.15)                                                                                 | 67.99<br>(60.83-73.68)  | 69.89<br>(63.45-75.57)  |
| Greece     | 84.77<br>(81.96-87.44)                                                                                                             | 84.01<br>(81.37-86.93) | 93.55<br>(90.65-96.34)  | 72.43<br>(69.16-75.88)                                                                                | 75.55<br>(72.75-78.88) | 83.40<br>(80.33-86.65) | 17.65<br>(12.38-22.85)                                                                            | 18.77<br>(13.49-24.24) | 22.89<br>(17.08-28.58) | 82.88<br>(78.54-86.38)                                                                                 | 82.88<br>(78.54-86.38)  | 83.18<br>(79.39-86.33)  |
| Iceland    | 67.29<br>(64.31-70.67)                                                                                                             | 76.52<br>(73.61-79.55) | 86.32<br>(83.62-89.15)  | 50.33<br>(46.96-54.98)                                                                                | 63.00<br>(59.33-67.07) | 71.49<br>(67.47-75.77) | 29.74<br>(24.89-34.57)                                                                            | 46.71<br>(42.78-50.37) | 66.02<br>(62.38-69.61) | 99.81<br>(99.08-100.00)                                                                                | 99.91<br>(99.35-100.00) | 99.81<br>(99.08-100.00) |
| Ireland    | 67.52<br>(64.28-70.86)                                                                                                             | 69.84<br>(66.85-73.02) | 80.00<br>(76.98-82.89)  | 69.55<br>(65.47-73.40)                                                                                | 70.41<br>(67.20-74.19) | 76.57<br>(73.35-80.11) | 34.67<br>(29.90-39.31)                                                                            | 41.87<br>(37.31-46.26) | 49.02<br>(43.80-53.81) | 82.11<br>(77.74-85.33)                                                                                 | 80.81<br>(76.81-84.08)  | 82.54<br>(77.46-86.55)  |
| Israel     | 81.19<br>(78.78-83.46)                                                                                                             | 82.35<br>(80.19-84.50) | 82.01<br>(79.33-84.94)  | 78.12<br>(74.94-81.06)                                                                                | 77.96<br>(75.12-80.95) | 83.87<br>(81.16-86.77) | 38.72<br>(32.51-44.33)                                                                            | 52.49<br>(48.19-56.48) | 56.71<br>(52.24-60.87) | 61.78<br>(53.29-69.02)                                                                                 | 60.96<br>(53.02-67.58)  | 61.78<br>(53.29-69.02)  |
| Italy      | 88.23<br>(85.57-90.98)                                                                                                             | 92.29<br>(89.55-94.96) | 96.24<br>(93.67-98.77)  | 62.15<br>(58.90-66.32)                                                                                | 69.22<br>(66.12-73.02) | 80.91<br>(77.90-84.12) | 38.03<br>(33.54-42.13)                                                                            | 45.21<br>(41.34-49.04) | 51.87<br>(47.45-56.14) | 67.65<br>(59.78-74.28)                                                                                 | 67.65<br>(59.78-74.28)  | 65.97<br>(58.59-72.06)  |
| Luxembourg | 80.46<br>(77.80-83.11)                                                                                                             | 80.74<br>(78.06-83.14) | 86.90<br>(84.43-89.44)  | 62.29<br>(59.15-66.76)                                                                                | 75.72<br>(72.73-78.87) | 84.90<br>(81.99-87.69) | 37.15<br>(31.21-42.61)                                                                            | 39.03<br>(34.30-43.46) | 49.37<br>(43.81-54.34) | 77.78<br>(72.49-82.11)                                                                                 | 77.78<br>(72.49-82.11)  | 77.15<br>(72.44-81.09)  |

**Appendix Table 1a. Scaled values for each SDG health-related indicator and three summary indicators by country for 1990, 2000, and 2015**

| Location       | Indicator 3.9.2: Age-standardised death rate attributable to unsafe water, sanitation, and hygiene (WaSH) (per 100,000 population) |                        |                        | Indicator 3.9.3: Age-standardised death rate due to unintentional poisonings (per 100,000 population) |                        |                        | Indicator 3.a.1: Age-standardised prevalence of daily smoking among populations aged 10 and older |                        |                        | Indicator 5.2.1: Prevalence of women aged 15 years and older who experienced intimate partner violence |                        |                        |
|----------------|------------------------------------------------------------------------------------------------------------------------------------|------------------------|------------------------|-------------------------------------------------------------------------------------------------------|------------------------|------------------------|---------------------------------------------------------------------------------------------------|------------------------|------------------------|--------------------------------------------------------------------------------------------------------|------------------------|------------------------|
|                | 1990                                                                                                                               | 2000                   | 2015                   | 1990                                                                                                  | 2000                   | 2015                   | 1990                                                                                              | 2000                   | 2015                   | 1990                                                                                                   | 2000                   | 2015                   |
| Malta          | 76.79<br>(73.95-79.63)                                                                                                             | 73.42<br>(70.43-76.53) | 81.13<br>(78.39-83.87) | 69.37<br>(66.35-73.47)                                                                                | 80.68<br>(77.47-83.79) | 88.50<br>(85.87-90.95) | 29.31<br>(22.98-35.52)                                                                            | 47.20<br>(42.24-51.97) | 53.79<br>(48.90-58.28) | 89.58<br>(86.93-91.84)                                                                                 | 89.58<br>(86.93-91.84) | 89.77<br>(87.34-91.75) |
| Netherlands    | 78.01<br>(75.17-80.89)                                                                                                             | 73.24<br>(70.49-76.11) | 79.82<br>(77.12-82.62) | 78.04<br>(75.10-81.01)                                                                                | 84.04<br>(81.49-86.56) | 88.97<br>(86.35-91.55) | 33.23<br>(29.05-37.49)                                                                            | 38.86<br>(35.38-42.46) | 57.69<br>(53.93-61.53) | 84.72<br>(81.44-87.61)                                                                                 | 84.31<br>(80.67-87.58) | 83.03<br>(79.28-86.22) |
| Norway         | 68.86<br>(65.98-71.98)                                                                                                             | 75.50<br>(72.92-78.11) | 80.57<br>(77.73-83.87) | 58.70<br>(55.33-62.90)                                                                                | 72.77<br>(68.74-76.07) | 63.30<br>(59.69-67.87) | 29.89<br>(24.18-35.24)                                                                            | 43.07<br>(38.13-47.90) | 64.84<br>(61.15-68.37) | 82.40<br>(77.94-85.57)                                                                                 | 79.09<br>(75.45-82.95) | 82.81<br>(78.73-86.41) |
| Portugal       | 68.30<br>(65.30-71.34)                                                                                                             | 68.43<br>(65.49-71.69) | 73.35<br>(70.44-76.31) | 61.57<br>(57.95-65.42)                                                                                | 71.26<br>(68.02-74.80) | 82.39<br>(79.16-85.16) | 51.64<br>(48.11-54.94)                                                                            | 54.29<br>(50.78-57.81) | 55.32<br>(50.96-59.50) | 82.27<br>(78.01-85.87)                                                                                 | 82.27<br>(78.01-85.87) | 81.87<br>(78.10-85.03) |
| Spain          | 77.63<br>(74.91-80.37)                                                                                                             | 80.56<br>(78.17-83.07) | 87.37<br>(84.95-89.78) | 61.94<br>(58.49-66.09)                                                                                | 75.43<br>(72.00-78.69) | 82.71<br>(79.41-85.61) | 23.81<br>(18.62-28.92)                                                                            | 31.56<br>(27.20-36.05) | 47.12<br>(42.09-51.64) | 91.68<br>(89.48-93.53)                                                                                 | 91.28<br>(88.84-93.22) | 91.02<br>(88.72-92.79) |
| Sweden         | 76.10<br>(73.13-78.79)                                                                                                             | 82.00<br>(79.60-84.28) | 87.10<br>(84.51-89.80) | 59.46<br>(56.33-64.15)                                                                                | 67.87<br>(64.87-71.89) | 71.02<br>(67.70-75.18) | 46.02<br>(41.55-50.26)                                                                            | 60.85<br>(58.00-63.48) | 74.98<br>(73.12-76.65) | 81.17<br>(76.88-85.13)                                                                                 | 81.99<br>(77.49-85.71) | 79.98<br>(75.34-84.12) |
| Switzerland    | 78.57<br>(75.85-81.08)                                                                                                             | 83.39<br>(80.76-86.15) | 91.60<br>(89.23-93.99) | 46.76<br>(42.95-57.56)                                                                                | 84.35<br>(80.98-87.04) | 89.13<br>(86.62-91.45) | 35.45<br>(31.78-39.38)                                                                            | 32.98<br>(28.58-37.19) | 54.16<br>(49.53-59.02) | 96.20<br>(95.01-97.22)                                                                                 | 96.28<br>(94.91-97.58) | 96.20<br>(95.01-97.22) |
| United Kingdom | 67.72<br>(65.11-70.70)                                                                                                             | 67.88<br>(65.27-70.71) | 77.45<br>(75.14-79.92) | 60.35<br>(57.28-64.80)                                                                                | 67.05<br>(64.25-70.74) | 75.48<br>(72.59-78.82) | 34.82<br>(29.43-40.13)                                                                            | 42.13<br>(38.22-46.00) | 54.69<br>(50.92-58.69) | 75.01<br>(69.50-80.15)                                                                                 | 71.84<br>(65.00-77.62) | 79.88<br>(75.69-83.59) |
| Argentina      | 60.32<br>(57.11-62.57)                                                                                                             | 60.23<br>(57.75-62.82) | 61.96<br>(59.47-64.61) | 52.11<br>(48.78-56.54)                                                                                | 57.82<br>(54.13-62.15) | 62.09<br>(58.20-66.44) | 44.41<br>(37.79-50.04)                                                                            | 48.44<br>(42.98-53.56) | 57.70<br>(53.17-62.02) | 83.50<br>(79.51-86.81)                                                                                 | 83.34<br>(79.43-86.88) | 83.50<br>(79.51-86.81) |
| Chile          | 51.36<br>(48.75-54.06)                                                                                                             | 62.60<br>(60.12-65.13) | 71.89<br>(69.09-74.78) | 49.58<br>(46.18-54.44)                                                                                | 70.19<br>(66.89-74.12) | 79.51<br>(76.05-82.72) | 48.11<br>(43.25-52.84)                                                                            | 34.14<br>(29.07-39.04) | 39.33<br>(33.54-44.94) | 70.90<br>(64.34-77.01)                                                                                 | 70.54<br>(64.02-75.96) | 70.90<br>(64.34-77.01) |
| Uruguay        | 61.65<br>(58.81-64.49)                                                                                                             | 64.16<br>(61.54-66.65) | 67.32<br>(64.59-70.03) | 48.39<br>(45.13-52.84)                                                                                | 61.06<br>(57.59-65.30) | 67.02<br>(63.46-71.26) | 31.90<br>(25.50-38.23)                                                                            | 38.93<br>(33.74-43.88) | 54.59<br>(49.67-59.33) | 83.84<br>(80.19-87.26)                                                                                 | 83.89<br>(80.21-87.21) | 83.84<br>(80.19-87.26) |

**Appendix Table 1a. Scaled values for each SDG health-related indicator and three summary indicators by country for 1990, 2000, and 2015**

| Location               | Indicator 3.9.2: Age-standardised death rate attributable to unsafe water, sanitation, and hygiene (WaSH) (per 100,000 population) |                        |                        | Indicator 3.9.3: Age-standardised death rate due to unintentional poisonings (per 100,000 population) |                        |                        | Indicator 3.a.1: Age-standardised prevalence of daily smoking among populations aged 10 and older |                        |                        | Indicator 5.2.1: Prevalence of women aged 15 years and older who experienced intimate partner violence |                        |                        |
|------------------------|------------------------------------------------------------------------------------------------------------------------------------|------------------------|------------------------|-------------------------------------------------------------------------------------------------------|------------------------|------------------------|---------------------------------------------------------------------------------------------------|------------------------|------------------------|--------------------------------------------------------------------------------------------------------|------------------------|------------------------|
|                        | 1990                                                                                                                               | 2000                   | 2015                   | 1990                                                                                                  | 2000                   | 2015                   | 1990                                                                                              | 2000                   | 2015                   | 1990                                                                                                   | 2000                   | 2015                   |
| Belarus                | 76.65<br>(73.81-79.42)                                                                                                             | 78.88<br>(76.22-81.57) | 92.85<br>(88.67-97.06) | 23.79<br>(20.25-31.61)                                                                                | 20.35<br>(16.79-28.67) | 39.08<br>(26.18-43.75) | 26.28<br>(20.30-32.16)                                                                            | 33.06<br>(27.66-38.59) | 34.82<br>(29.36-39.94) | 75.47<br>(70.44-80.16)                                                                                 | 75.47<br>(70.44-80.16) | 75.47<br>(70.44-80.16) |
| Estonia                | 79.92<br>(77.27-82.33)                                                                                                             | 77.92<br>(75.08-80.72) | 94.97<br>(91.16-98.54) | 28.41<br>(25.35-33.17)                                                                                | 44.28<br>(40.30-48.92) | 66.01<br>(60.00-70.92) | 34.08<br>(29.22-38.82)                                                                            | 36.42<br>(32.66-40.25) | 47.05<br>(42.48-51.66) | 84.05<br>(80.81-87.13)                                                                                 | 84.05<br>(80.81-87.13) | 83.91<br>(81.20-86.73) |
| Latvia                 | 80.48<br>(77.90-82.74)                                                                                                             | 79.55<br>(76.91-82.22) | 89.90<br>(86.60-93.27) | 32.14<br>(28.60-36.56)                                                                                | 37.69<br>(33.59-42.62) | 55.73<br>(49.27-60.94) | 38.68<br>(32.68-44.21)                                                                            | 31.88<br>(28.15-35.99) | 35.61<br>(30.65-40.49) | 77.07<br>(72.77-81.31)                                                                                 | 77.07<br>(72.77-81.31) | 75.91<br>(71.27-79.92) |
| Lithuania              | 85.08<br>(82.33-87.48)                                                                                                             | 83.55<br>(80.84-86.23) | 87.84<br>(84.67-90.71) | 28.39<br>(25.29-32.89)                                                                                | 42.69<br>(38.36-47.67) | 58.89<br>(50.66-63.66) | 41.74<br>(36.37-46.72)                                                                            | 43.78<br>(40.06-47.32) | 44.95<br>(39.94-49.93) | 82.54<br>(78.97-85.83)                                                                                 | 82.54<br>(78.97-85.83) | 81.71<br>(78.44-84.59) |
| Moldova                | 64.44<br>(61.33-67.50)                                                                                                             | 62.95<br>(59.80-66.00) | 79.16<br>(75.71-82.53) | 25.83<br>(22.13-30.00)                                                                                | 27.30<br>(24.22-31.31) | 52.72<br>(44.07-57.93) | 48.40<br>(43.55-53.08)                                                                            | 53.89<br>(49.62-58.13) | 56.38<br>(52.76-59.61) | 67.92<br>(62.02-74.03)                                                                                 | 67.57<br>(61.89-73.34) | 67.92<br>(62.02-74.03) |
| Russia                 | 72.68<br>(70.31-75.13)                                                                                                             | 68.59<br>(65.99-71.07) | 78.77<br>(75.76-81.86) | 35.72<br>(29.78-40.20)                                                                                | 37.95<br>(29.19-42.43) | 47.35<br>(41.25-52.29) | 41.35<br>(37.30-45.52)                                                                            | 36.11<br>(32.28-39.70) | 41.41<br>(36.59-45.70) | 64.31<br>(57.36-71.00)                                                                                 | 64.02<br>(57.39-70.57) | 64.31<br>(57.36-71.00) |
| Ukraine                | 76.67<br>(73.83-79.49)                                                                                                             | 74.87<br>(72.05-77.56) | 88.53<br>(84.86-92.07) | 22.22<br>(18.71-26.06)                                                                                | 17.34<br>(14.95-20.55) | 42.93<br>(34.46-48.28) | 29.60<br>(24.18-35.18)                                                                            | 32.82<br>(28.46-37.17) | 39.54<br>(34.12-44.96) | 72.73<br>(67.43-77.91)                                                                                 | 71.16<br>(65.80-76.34) | 72.73<br>(67.43-77.91) |
| Albania                | 52.10<br>(47.82-58.58)                                                                                                             | 63.81<br>(60.48-68.47) | 81.45<br>(76.61-85.89) | 71.89<br>(62.27-75.63)                                                                                | 60.33<br>(56.69-67.36) | 77.07<br>(72.99-80.21) | 57.46<br>(53.17-61.72)                                                                            | 61.11<br>(57.80-64.43) | 63.88<br>(59.76-67.68) | 87.04<br>(84.30-89.50)                                                                                 | 87.88<br>(85.52-90.18) | 87.04<br>(84.30-89.50) |
| Bosnia and Herzegovina | 71.11<br>(67.83-74.29)                                                                                                             | 81.06<br>(77.02-85.44) | 92.55<br>(85.70-97.70) | 9.05<br>(5.75-17.42)                                                                                  | 20.30<br>(15.00-24.93) | 55.42<br>(25.12-63.44) | 37.15<br>(30.53-43.48)                                                                            | 31.73<br>(26.88-36.04) | 31.00<br>(24.80-37.39) | 83.35<br>(78.92-87.51)                                                                                 | 83.35<br>(78.92-87.51) | 83.35<br>(78.92-87.51) |
| Bulgaria               | 63.04<br>(60.37-65.92)                                                                                                             | 69.74<br>(67.03-72.46) | 80.62<br>(77.49-83.64) | 51.19<br>(47.90-55.78)                                                                                | 52.82<br>(49.32-57.47) | 66.99<br>(62.75-71.09) | 21.55<br>(12.96-29.30)                                                                            | 15.86<br>(8.24-22.47)  | 23.22<br>(16.50-29.92) | 84.96<br>(81.91-87.99)                                                                                 | 84.96<br>(81.91-87.99) | 84.08<br>(80.90-86.76) |
| Croatia                | 73.39<br>(70.84-75.86)                                                                                                             | 72.85<br>(70.04-75.65) | 87.89<br>(84.76-90.88) | 57.18<br>(53.80-61.61)                                                                                | 75.91<br>(71.93-79.15) | 83.61<br>(80.33-86.46) | 22.64<br>(15.85-29.65)                                                                            | 36.77<br>(31.57-41.62) | 32.14<br>(25.18-38.51) | 90.42<br>(88.16-92.68)                                                                                 | 90.42<br>(88.16-92.68) | 91.02<br>(88.69-93.06) |

**Appendix Table 1a. Scaled values for each SDG health-related indicator and three summary indicators by country for 1990, 2000, and 2015**

| Location       | Indicator 3.9.2: Age-standardised death rate attributable to unsafe water, sanitation, and hygiene (WaSH) (per 100,000 population) |                        |                        | Indicator 3.9.3: Age-standardised death rate due to unintentional poisonings (per 100,000 population) |                        |                        | Indicator 3.a.1: Age-standardised prevalence of daily smoking among populations aged 10 and older |                        |                        | Indicator 5.2.1: Prevalence of women aged 15 years and older who experienced intimate partner violence |                        |                        |
|----------------|------------------------------------------------------------------------------------------------------------------------------------|------------------------|------------------------|-------------------------------------------------------------------------------------------------------|------------------------|------------------------|---------------------------------------------------------------------------------------------------|------------------------|------------------------|--------------------------------------------------------------------------------------------------------|------------------------|------------------------|
|                | 1990                                                                                                                               | 2000                   | 2015                   | 1990                                                                                                  | 2000                   | 2015                   | 1990                                                                                              | 2000                   | 2015                   | 1990                                                                                                   | 2000                   | 2015                   |
| Czech Republic | 74.81<br>(71.98-77.76)                                                                                                             | 76.01<br>(73.04-79.32) | 77.47<br>(74.16-80.99) | 45.12<br>(41.97-49.67)                                                                                | 70.05<br>(66.31-73.94) | 75.62<br>(72.04-79.49) | 33.69<br>(27.18-40.06)                                                                            | 40.32<br>(35.99-44.75) | 42.16<br>(36.26-47.45) | 59.60<br>(50.73-67.87)                                                                                 | 55.93<br>(48.59-63.55) | 59.62<br>(50.75-68.04) |
| Hungary        | 83.04<br>(80.37-85.60)                                                                                                             | 87.62<br>(84.95-90.08) | 89.96<br>(86.31-95.78) | 53.47<br>(50.08-58.08)                                                                                | 75.14<br>(69.99-78.44) | 82.37<br>(78.70-85.83) | 27.99<br>(20.88-34.61)                                                                            | 29.51<br>(23.28-35.22) | 39.68<br>(33.65-45.94) | 91.16<br>(89.18-93.09)                                                                                 | 91.48<br>(89.78-93.35) | 90.40<br>(88.20-92.43) |
| Macedonia      | 54.75<br>(51.11-58.67)                                                                                                             | 73.88<br>(70.43-77.13) | 89.43<br>(84.48-93.77) | 69.73<br>(66.18-72.47)                                                                                | 70.08<br>(67.27-72.98) | 72.91<br>(68.14-79.79) | 38.97<br>(32.57-45.29)                                                                            | 36.05<br>(29.67-42.35) | 28.33<br>(21.33-34.42) | 83.35<br>(78.92-87.51)                                                                                 | 83.35<br>(78.92-87.51) | 83.35<br>(78.92-87.51) |
| Montenegro     | 80.98<br>(76.79-85.50)                                                                                                             | 80.25<br>(77.05-83.44) | 93.61<br>(89.51-97.59) | 53.44<br>(45.89-59.88)                                                                                | 53.93<br>(50.55-58.09) | 63.76<br>(58.99-67.59) | 47.65<br>(42.05-53.05)                                                                            | 35.83<br>(29.36-42.01) | 28.24<br>(22.25-34.39) | 83.35<br>(78.92-87.51)                                                                                 | 83.35<br>(78.92-87.51) | 83.35<br>(78.92-87.51) |
| Poland         | 72.52<br>(69.97-75.16)                                                                                                             | 74.98<br>(71.91-78.13) | 79.21<br>(75.88-82.60) | 38.76<br>(35.66-44.16)                                                                                | 66.36<br>(61.96-70.57) | 80.35<br>(73.83-83.66) | 22.18<br>(17.53-27.14)                                                                            | 36.30<br>(30.75-41.45) | 45.02<br>(39.76-49.98) | 87.97<br>(85.48-90.25)                                                                                 | 87.98<br>(85.80-90.08) | 89.02<br>(86.03-91.73) |
| Romania        | 58.70<br>(56.20-61.51)                                                                                                             | 62.25<br>(59.65-65.02) | 76.26<br>(73.28-79.44) | 35.60<br>(32.32-40.24)                                                                                | 50.29<br>(45.57-55.30) | 66.32<br>(59.82-70.78) | 45.83<br>(40.30-51.16)                                                                            | 39.32<br>(34.83-44.11) | 46.14<br>(40.98-50.93) | 54.90<br>(46.15-63.37)                                                                                 | 55.16<br>(48.57-62.70) | 57.07<br>(48.13-66.11) |
| Serbia         | 77.75<br>(73.50-82.12)                                                                                                             | 83.39<br>(78.89-86.52) | 88.43<br>(85.16-91.70) | 60.94<br>(56.96-67.01)                                                                                | 64.02<br>(61.14-68.10) | 73.09<br>(69.57-76.01) | 44.69<br>(37.96-50.97)                                                                            | 35.45<br>(30.04-40.76) | 42.98<br>(36.53-49.14) | 81.76<br>(78.16-85.48)                                                                                 | 81.44<br>(78.08-84.60) | 81.76<br>(78.16-85.48) |
| Slovakia       | 60.13<br>(56.10-65.84)                                                                                                             | 66.01<br>(62.66-69.73) | 73.96<br>(70.48-77.87) | 54.60<br>(50.97-61.33)                                                                                | 62.45<br>(59.25-65.53) | 75.48<br>(69.81-78.37) | 37.87<br>(31.05-44.07)                                                                            | 48.59<br>(43.14-54.06) | 51.69<br>(46.21-56.49) | 83.01<br>(79.57-86.48)                                                                                 | 83.01<br>(79.57-86.48) | 82.63<br>(79.54-85.52) |
| Slovenia       | 70.89<br>(67.94-73.88)                                                                                                             | 69.26<br>(66.29-72.76) | 79.57<br>(75.66-83.19) | 62.39<br>(59.18-66.82)                                                                                | 65.96<br>(62.87-69.92) | 79.57<br>(75.34-83.49) | 32.44<br>(24.88-39.50)                                                                            | 48.15<br>(42.40-53.45) | 50.11<br>(44.74-54.79) | 92.69<br>(91.09-94.34)                                                                                 | 92.69<br>(91.09-94.34) | 92.10<br>(90.42-93.56) |
| Armenia        | 49.57<br>(46.33-52.95)                                                                                                             | 60.23<br>(57.15-63.42) | 79.92<br>(76.58-84.07) | 37.86<br>(33.63-49.02)                                                                                | 47.36<br>(43.53-51.55) | 61.23<br>(51.29-65.61) | 49.63<br>(44.12-54.87)                                                                            | 49.80<br>(46.04-53.45) | 50.69<br>(46.09-55.20) | 80.16<br>(75.10-84.74)                                                                                 | 80.16<br>(75.10-84.74) | 80.16<br>(75.10-84.74) |
| Azerbaijan     | 40.13<br>(36.95-43.36)                                                                                                             | 45.10<br>(42.12-48.34) | 67.34<br>(63.09-71.11) | 42.05<br>(38.23-48.80)                                                                                | 50.52<br>(42.83-53.62) | 61.99<br>(54.56-66.11) | 62.29<br>(57.44-66.99)                                                                            | 61.39<br>(56.96-65.87) | 51.46<br>(46.68-56.29) | 78.46<br>(73.72-82.86)                                                                                 | 75.79<br>(70.79-80.55) | 78.46<br>(73.72-82.86) |

**Appendix Table 1a. Scaled values for each SDG health-related indicator and three summary indicators by country for 1990, 2000, and 2015**

| Location     | Indicator 3.9.2: Age-standardised death rate attributable to unsafe water, sanitation, and hygiene (WaSH) (per 100,000 population) |                        |                        | Indicator 3.9.3: Age-standardised death rate due to unintentional poisonings (per 100,000 population) |                        |                        | Indicator 3.a.1: Age-standardised prevalence of daily smoking among populations aged 10 and older |                        |                        | Indicator 5.2.1: Prevalence of women aged 15 years and older who experienced intimate partner violence |                        |                        |
|--------------|------------------------------------------------------------------------------------------------------------------------------------|------------------------|------------------------|-------------------------------------------------------------------------------------------------------|------------------------|------------------------|---------------------------------------------------------------------------------------------------|------------------------|------------------------|--------------------------------------------------------------------------------------------------------|------------------------|------------------------|
|              | 1990                                                                                                                               | 2000                   | 2015                   | 1990                                                                                                  | 2000                   | 2015                   | 1990                                                                                              | 2000                   | 2015                   | 1990                                                                                                   | 2000                   | 2015                   |
| Georgia      | 57.72<br>(54.95-60.59)                                                                                                             | 63.94<br>(60.93-67.30) | 82.19<br>(79.21-85.23) | 42.86<br>(38.63-51.99)                                                                                | 56.30<br>(47.06-59.90) | 57.14<br>(50.30-60.94) | 56.16<br>(51.01-61.15)                                                                            | 52.65<br>(48.11-57.01) | 50.55<br>(45.53-55.52) | 95.03<br>(93.63-96.17)                                                                                 | 94.71<br>(93.25-96.22) | 95.03<br>(93.63-96.17) |
| Kazakhstan   | 53.05<br>(50.30-56.19)                                                                                                             | 59.44<br>(56.69-62.35) | 78.41<br>(75.47-81.19) | 19.42<br>(12.08-22.94)                                                                                | 0.21<br>(0.00-3.17)    | 37.56<br>(26.34-42.59) | 52.49<br>(47.14-57.41)                                                                            | 57.02<br>(52.74-61.09) | 53.42<br>(49.49-57.20) | 85.76<br>(82.44-88.57)                                                                                 | 85.04<br>(81.75-88.00) | 86.63<br>(83.97-89.16) |
| Kyrgyzstan   | 44.30<br>(41.67-47.22)                                                                                                             | 50.04<br>(47.45-52.71) | 65.84<br>(62.68-68.68) | 29.31<br>(25.03-42.36)                                                                                | 37.08<br>(32.70-41.12) | 53.59<br>(39.77-58.12) | 62.58<br>(57.72-66.57)                                                                            | 62.69<br>(59.28-66.04) | 58.99<br>(54.47-62.90) | 55.42<br>(46.56-64.29)                                                                                 | 55.42<br>(46.56-64.29) | 54.02<br>(45.53-62.07) |
| Mongolia     | 46.37<br>(42.78-50.17)                                                                                                             | 55.10<br>(51.77-58.64) | 75.09<br>(70.10-79.27) | 14.37<br>(8.35-30.26)                                                                                 | 18.44<br>(13.59-29.61) | 39.72<br>(27.51-44.56) | 48.34<br>(42.98-53.78)                                                                            | 46.66<br>(42.65-50.80) | 50.85<br>(45.66-56.12) | 80.16<br>(75.10-84.74)                                                                                 | 80.16<br>(75.10-84.74) | 80.16<br>(75.10-84.74) |
| Tajikistan   | 29.74<br>(26.49-33.74)                                                                                                             | 33.54<br>(30.48-36.95) | 50.13<br>(45.96-54.07) | 37.27<br>(33.80-43.31)                                                                                | 38.56<br>(33.92-42.09) | 47.17<br>(42.15-51.12) | 52.12<br>(46.82-56.86)                                                                            | 71.08<br>(66.75-75.15) | 77.03<br>(73.12-80.74) | 72.06<br>(66.60-77.51)                                                                                 | 72.06<br>(66.60-77.51) | 71.26<br>(66.51-76.12) |
| Turkmenistan | 34.84<br>(31.51-38.71)                                                                                                             | 37.14<br>(32.68-41.55) | 61.30<br>(56.36-66.41) | 42.08<br>(38.50-46.61)                                                                                | 41.38<br>(37.35-46.50) | 58.55<br>(48.36-62.67) | 78.86<br>(75.06-82.24)                                                                            | 82.91<br>(79.62-85.67) | 84.78<br>(81.88-87.26) | 80.16<br>(75.10-84.74)                                                                                 | 80.16<br>(75.10-84.74) | 80.16<br>(75.10-84.74) |
| Uzbekistan   | 47.02<br>(44.07-49.96)                                                                                                             | 55.20<br>(52.18-58.21) | 68.77<br>(65.08-72.33) | 43.06<br>(39.38-47.35)                                                                                | 44.58<br>(39.03-47.53) | 52.16<br>(45.64-56.30) | 79.78<br>(76.32-83.13)                                                                            | 77.23<br>(73.96-80.20) | 80.79<br>(78.07-83.38) | 80.16<br>(75.10-84.74)                                                                                 | 80.16<br>(75.10-84.74) | 80.16<br>(75.10-84.74) |
| Colombia     | 46.33<br>(43.63-49.33)                                                                                                             | 55.07<br>(52.22-57.64) | 66.50<br>(63.31-69.00) | 52.05<br>(48.67-56.68)                                                                                | 72.72<br>(68.42-76.31) | 83.11<br>(79.32-85.87) | 61.66<br>(54.49-68.23)                                                                            | 66.04<br>(59.88-71.59) | 76.85<br>(72.43-80.72) | 51.40<br>(41.84-60.82)                                                                                 | 50.72<br>(43.36-58.84) | 52.83<br>(44.96-60.95) |
| Costa Rica   | 55.71<br>(53.22-58.45)                                                                                                             | 61.34<br>(58.75-63.82) | 70.96<br>(67.90-73.79) | 59.48<br>(55.98-64.28)                                                                                | 69.29<br>(66.19-73.04) | 75.05<br>(71.53-78.25) | 73.87<br>(69.30-78.21)                                                                            | 75.28<br>(71.24-78.90) | 83.07<br>(79.34-86.28) | 64.42<br>(57.50-71.64)                                                                                 | 62.91<br>(55.92-69.73) | 64.42<br>(57.50-71.64) |
| El Salvador  | 30.10<br>(27.01-33.63)                                                                                                             | 42.39<br>(39.41-45.77) | 55.80<br>(52.48-59.63) | 22.39<br>(16.02-47.01)                                                                                | 62.42<br>(54.91-65.56) | 78.03<br>(60.01-83.71) | 83.79<br>(80.18-87.06)                                                                            | 85.06<br>(81.55-88.05) | 86.21<br>(82.92-89.17) | 76.46<br>(71.63-81.11)                                                                                 | 74.44<br>(69.16-79.20) | 76.46<br>(71.63-81.11) |
| Guatemala    | 16.05<br>(12.60-20.50)                                                                                                             | 25.05<br>(21.49-28.76) | 36.52<br>(31.67-40.39) | 41.90<br>(36.60-46.84)                                                                                | 50.83<br>(47.37-55.73) | 50.31<br>(46.37-55.78) | 83.02<br>(79.19-86.40)                                                                            | 85.23<br>(82.12-87.86) | 82.99<br>(79.15-86.27) | 73.06<br>(67.46-78.42)                                                                                 | 70.04<br>(65.52-74.47) | 73.06<br>(67.46-78.42) |

**Appendix Table 1a. Scaled values for each SDG health-related indicator and three summary indicators by country for 1990, 2000, and 2015**

| Location            | Indicator 3.9.2: Age-standardised death rate attributable to unsafe water, sanitation, and hygiene (WaSH) (per 100,000 population) |                        |                        | Indicator 3.9.3: Age-standardised death rate due to unintentional poisonings (per 100,000 population) |                        |                        | Indicator 3.a.1: Age-standardised prevalence of daily smoking among populations aged 10 and older |                        |                        | Indicator 5.2.1: Prevalence of women aged 15 years and older who experienced intimate partner violence |                        |                        |
|---------------------|------------------------------------------------------------------------------------------------------------------------------------|------------------------|------------------------|-------------------------------------------------------------------------------------------------------|------------------------|------------------------|---------------------------------------------------------------------------------------------------|------------------------|------------------------|--------------------------------------------------------------------------------------------------------|------------------------|------------------------|
|                     | 1990                                                                                                                               | 2000                   | 2015                   | 1990                                                                                                  | 2000                   | 2015                   | 1990                                                                                              | 2000                   | 2015                   | 1990                                                                                                   | 2000                   | 2015                   |
| Honduras            | 29.86<br>(26.51-33.67)                                                                                                             | 34.25<br>(30.41-38.07) | 43.98<br>(39.71-48.33) | 50.42<br>(46.55-56.57)                                                                                | 49.60<br>(43.38-62.09) | 53.59<br>(46.64-66.46) | 70.93<br>(65.10-76.13)                                                                            | 73.42<br>(68.95-77.42) | 79.48<br>(75.98-83.12) | 76.28<br>(71.36-81.21)                                                                                 | 77.72<br>(74.16-81.68) | 72.58<br>(67.79-77.38) |
| Mexico              | 34.87<br>(32.04-38.51)                                                                                                             | 52.05<br>(48.92-54.74) | 60.73<br>(57.70-63.11) | 48.04<br>(44.62-52.51)                                                                                | 60.64<br>(56.95-65.09) | 68.21<br>(64.45-72.21) | 54.34<br>(51.35-57.12)                                                                            | 70.39<br>(68.59-72.14) | 77.51<br>(76.05-79.05) | 61.52<br>(55.58-67.85)                                                                                 | 60.00<br>(52.62-66.58) | 63.93<br>(58.96-69.65) |
| Nicaragua           | 30.21<br>(27.18-34.02)                                                                                                             | 45.27<br>(42.20-48.56) | 61.60<br>(58.50-64.73) | 54.34<br>(50.60-61.02)                                                                                | 62.09<br>(59.10-65.66) | 69.39<br>(65.82-72.44) | 74.79<br>(69.28-79.23)                                                                            | 78.67<br>(74.33-82.60) | 79.85<br>(75.65-83.96) | 74.14<br>(69.19-79.59)                                                                                 | 73.50<br>(68.81-77.58) | 74.14<br>(69.19-79.59) |
| Panama              | 49.83<br>(46.74-52.83)                                                                                                             | 56.12<br>(53.08-58.84) | 57.99<br>(54.98-60.96) | 56.07<br>(52.69-60.37)                                                                                | 61.13<br>(57.28-63.91) | 65.19<br>(61.02-68.88) | 80.85<br>(76.89-84.31)                                                                            | 83.07<br>(80.18-85.76) | 93.18<br>(91.76-94.42) | 70.05<br>(63.80-76.30)                                                                                 | 70.05<br>(63.80-76.30) | 70.05<br>(63.80-76.30) |
| Venezuela           | 44.29<br>(41.55-47.15)                                                                                                             | 49.94<br>(47.20-53.17) | 58.23<br>(55.30-61.25) | 55.26<br>(51.97-59.84)                                                                                | 68.50<br>(64.44-72.34) | 73.24<br>(68.91-77.13) | 63.44<br>(56.83-69.70)                                                                            | 66.06<br>(59.85-71.52) | 68.99<br>(63.35-73.88) | 70.05<br>(63.80-76.30)                                                                                 | 70.05<br>(63.80-76.30) | 70.05<br>(63.80-76.30) |
| Bolivia             | 23.97<br>(20.39-28.02)                                                                                                             | 32.92<br>(29.72-36.66) | 46.27<br>(42.53-50.13) | 23.49<br>(11.42-30.93)                                                                                | 33.78<br>(27.28-37.50) | 39.12<br>(29.65-45.24) | 44.76<br>(37.98-51.56)                                                                            | 40.30<br>(34.29-46.36) | 51.40<br>(44.07-57.94) | 58.16<br>(49.36-66.74)                                                                                 | 53.78<br>(47.41-60.04) | 58.16<br>(49.36-66.74) |
| Ecuador             | 34.82<br>(32.04-37.99)                                                                                                             | 44.29<br>(41.68-47.05) | 55.55<br>(52.70-58.31) | 40.40<br>(36.46-50.55)                                                                                | 53.77<br>(48.70-56.57) | 62.93<br>(55.45-66.48) | 78.88<br>(74.66-82.55)                                                                            | 82.15<br>(79.97-83.98) | 88.71<br>(86.54-90.44) | 59.64<br>(51.66-67.54)                                                                                 | 59.45<br>(53.96-66.26) | 59.64<br>(51.66-67.54) |
| Peru                | 32.70<br>(29.84-35.96)                                                                                                             | 43.36<br>(40.66-46.43) | 51.44<br>(47.64-55.97) | 48.82<br>(44.87-51.93)                                                                                | 53.46<br>(50.13-58.56) | 62.34<br>(58.37-67.54) | 75.98<br>(70.54-80.63)                                                                            | 76.91<br>(72.25-80.89) | 82.05<br>(78.61-85.13) | 79.45<br>(75.10-83.65)                                                                                 | 72.29<br>(68.09-76.89) | 84.04<br>(80.94-87.36) |
| Antigua and Barbuda | 51.96<br>(49.18-54.74)                                                                                                             | 55.45<br>(52.90-58.10) | 60.46<br>(57.38-63.70) | 52.00<br>(48.26-56.63)                                                                                | 60.09<br>(56.15-64.60) | 65.56<br>(61.76-69.76) | 95.36<br>(93.81-96.70)                                                                            | 95.12<br>(93.61-96.52) | 93.88<br>(91.99-95.39) | 73.01<br>(67.08-78.76)                                                                                 | 73.01<br>(67.08-78.76) | 73.01<br>(67.08-78.76) |
| The Bahamas         | 52.01<br>(49.03-55.08)                                                                                                             | 58.57<br>(55.33-61.71) | 63.15<br>(59.63-66.78) | 51.43<br>(47.71-59.16)                                                                                | 62.30<br>(58.69-65.19) | 68.92<br>(64.71-72.55) | 93.71<br>(91.69-95.32)                                                                            | 93.63<br>(91.73-95.27) | 87.41<br>(84.27-90.10) | 73.01<br>(67.08-78.76)                                                                                 | 73.01<br>(67.08-78.76) | 73.01<br>(67.08-78.76) |
| Barbados            | 58.39<br>(55.28-61.19)                                                                                                             | 58.94<br>(55.87-61.98) | 61.02<br>(57.51-64.42) | 58.95<br>(55.66-63.53)                                                                                | 70.34<br>(66.71-73.87) | 74.61<br>(70.61-78.00) | 92.48<br>(90.24-94.31)                                                                            | 91.70<br>(89.30-93.70) | 90.92<br>(88.30-93.19) | 73.01<br>(67.08-78.76)                                                                                 | 73.01<br>(67.08-78.76) | 73.01<br>(67.08-78.76) |

**Appendix Table 1a. Scaled values for each SDG health-related indicator and three summary indicators by country for 1990, 2000, and 2015**

| Location                         | Indicator 3.9.2: Age-standardised death rate attributable to unsafe water, sanitation, and hygiene (WaSH) (per 100,000 population) |                        |                        | Indicator 3.9.3: Age-standardised death rate due to unintentional poisonings (per 100,000 population) |                        |                        | Indicator 3.a.1: Age-standardised prevalence of daily smoking among populations aged 10 and older |                        |                        | Indicator 5.2.1: Prevalence of women aged 15 years and older who experienced intimate partner violence |                        |                        |
|----------------------------------|------------------------------------------------------------------------------------------------------------------------------------|------------------------|------------------------|-------------------------------------------------------------------------------------------------------|------------------------|------------------------|---------------------------------------------------------------------------------------------------|------------------------|------------------------|--------------------------------------------------------------------------------------------------------|------------------------|------------------------|
|                                  | 1990                                                                                                                               | 2000                   | 2015                   | 1990                                                                                                  | 2000                   | 2015                   | 1990                                                                                              | 2000                   | 2015                   | 1990                                                                                                   | 2000                   | 2015                   |
| Belize                           | 42.71<br>(39.77-45.91)                                                                                                             | 45.44<br>(42.64-48.32) | 51.43<br>(48.31-54.60) | 45.65<br>(42.27-51.95)                                                                                | 51.25<br>(45.94-54.33) | 58.57<br>(52.05-62.40) | 76.90<br>(72.05-81.23)                                                                            | 79.93<br>(75.75-83.63) | 82.79<br>(79.16-86.15) | 88.77<br>(86.05-91.19)                                                                                 | 87.76<br>(84.86-90.19) | 88.77<br>(86.05-91.19) |
| Cuba                             | 54.18<br>(51.71-56.82)                                                                                                             | 55.16<br>(52.59-57.83) | 60.86<br>(58.17-63.55) | 48.73<br>(45.39-53.20)                                                                                | 61.88<br>(57.92-66.22) | 77.55<br>(73.23-81.07) | 37.74<br>(29.07-46.06)                                                                            | 40.01<br>(32.58-47.51) | 64.12<br>(57.80-69.69) | 73.01<br>(67.08-78.76)                                                                                 | 73.01<br>(67.08-78.76) | 73.01<br>(67.08-78.76) |
| Dominica                         | 48.66<br>(45.62-51.82)                                                                                                             | 52.88<br>(49.94-55.70) | 55.86<br>(52.56-59.17) | 39.50<br>(35.89-46.13)                                                                                | 48.22<br>(41.97-51.31) | 51.34<br>(41.77-56.29) | 90.44<br>(87.91-92.77)                                                                            | 91.15<br>(88.42-93.38) | 92.33<br>(89.94-94.37) | 73.01<br>(67.08-78.76)                                                                                 | 73.01<br>(67.08-78.76) | 73.01<br>(67.08-78.76) |
| Dominican Republic               | 36.40<br>(33.21-39.90)                                                                                                             | 48.50<br>(45.63-51.60) | 58.47<br>(55.51-61.28) | 54.58<br>(51.07-60.43)                                                                                | 67.82<br>(62.31-70.81) | 74.15<br>(65.57-78.02) | 69.18<br>(63.90-74.40)                                                                            | 72.97<br>(69.58-76.12) | 84.61<br>(81.23-87.47) | 74.07<br>(67.94-79.35)                                                                                 | 72.60<br>(67.88-76.97) | 71.85<br>(67.96-75.92) |
| Grenada                          | 46.30<br>(42.98-49.63)                                                                                                             | 50.26<br>(47.01-53.59) | 53.70<br>(50.21-57.24) | 46.32<br>(42.61-53.40)                                                                                | 53.42<br>(49.33-56.31) | 58.67<br>(52.52-62.50) | 86.54<br>(82.86-89.60)                                                                            | 85.11<br>(81.55-88.15) | 85.67<br>(82.31-88.60) | 73.01<br>(67.08-78.76)                                                                                 | 73.01<br>(67.08-78.76) | 73.01<br>(67.08-78.76) |
| Guyana                           | 33.73<br>(30.86-37.00)                                                                                                             | 37.25<br>(34.35-40.58) | 46.06<br>(43.04-49.19) | 45.56<br>(42.04-51.98)                                                                                | 51.63<br>(47.83-54.52) | 58.83<br>(53.78-62.54) | 82.95<br>(79.31-86.63)                                                                            | 79.15<br>(74.68-82.93) | 79.61<br>(75.51-83.45) | 73.01<br>(67.08-78.76)                                                                                 | 73.01<br>(67.08-78.76) | 73.01<br>(67.08-78.76) |
| Haiti                            | 16.69<br>(12.78-20.76)                                                                                                             | 25.42<br>(21.73-29.50) | 33.29<br>(28.76-37.94) | 27.49<br>(12.07-35.99)                                                                                | 38.30<br>(25.40-46.85) | 45.52<br>(34.01-53.62) | 77.16<br>(72.60-81.25)                                                                            | 79.70<br>(76.22-82.74) | 87.94<br>(85.39-90.27) | 69.96<br>(63.65-76.51)                                                                                 | 69.82<br>(65.35-74.79) | 71.17<br>(65.54-76.45) |
| Jamaica                          | 49.28<br>(45.97-52.80)                                                                                                             | 60.36<br>(57.75-62.99) | 65.82<br>(62.58-69.00) | 65.84<br>(60.82-68.72)                                                                                | 63.72<br>(59.78-66.61) | 66.03<br>(61.63-69.58) | 72.53<br>(67.25-77.47)                                                                            | 68.48<br>(63.88-72.66) | 78.40<br>(73.96-82.36) | 58.50<br>(49.11-66.78)                                                                                 | 60.14<br>(52.38-67.79) | 58.50<br>(49.11-66.78) |
| Saint Lucia                      | 46.87<br>(43.04-50.36)                                                                                                             | 52.89<br>(50.22-55.79) | 58.58<br>(55.52-61.49) | 58.29<br>(54.55-63.11)                                                                                | 68.77<br>(65.35-72.71) | 74.28<br>(70.26-77.87) | 84.80<br>(81.02-88.33)                                                                            | 82.57<br>(78.07-86.37) | 82.28<br>(77.97-85.81) | 73.01<br>(67.08-78.76)                                                                                 | 73.01<br>(67.08-78.76) | 73.01<br>(67.08-78.76) |
| Saint Vincent and the Grenadines | 44.31<br>(40.60-48.22)                                                                                                             | 48.76<br>(45.80-51.84) | 55.27<br>(52.16-58.14) | 55.73<br>(51.92-60.49)                                                                                | 64.40<br>(60.45-68.60) | 69.03<br>(65.34-72.75) | 79.39<br>(75.00-83.71)                                                                            | 82.58<br>(78.85-86.19) | 86.12<br>(82.72-89.06) | 73.01<br>(67.08-78.76)                                                                                 | 73.01<br>(67.08-78.76) | 73.01<br>(67.08-78.76) |
| Suriname                         | 40.00<br>(37.03-43.27)                                                                                                             | 45.48<br>(42.65-48.57) | 54.10<br>(51.07-57.09) | 48.84<br>(45.05-55.49)                                                                                | 56.68<br>(51.31-59.61) | 63.36<br>(56.33-67.24) | 68.44<br>(62.64-74.01)                                                                            | 67.31<br>(60.97-72.71) | 58.69<br>(54.01-63.59) | 73.01<br>(67.08-78.76)                                                                                 | 73.01<br>(67.08-78.76) | 73.01<br>(67.08-78.76) |

**Appendix Table 1a. Scaled values for each SDG health-related indicator and three summary indicators by country for 1990, 2000, and 2015**

| Location            | Indicator 3.9.2: Age-standardised death rate attributable to unsafe water, sanitation, and hygiene (WaSH) (per 100,000 population) |                        |                        | Indicator 3.9.3: Age-standardised death rate due to unintentional poisonings (per 100,000 population) |                        |                        | Indicator 3.a.1: Age-standardised prevalence of daily smoking among populations aged 10 and older |                        |                        | Indicator 5.2.1: Prevalence of women aged 15 years and older who experienced intimate partner violence |                        |                        |
|---------------------|------------------------------------------------------------------------------------------------------------------------------------|------------------------|------------------------|-------------------------------------------------------------------------------------------------------|------------------------|------------------------|---------------------------------------------------------------------------------------------------|------------------------|------------------------|--------------------------------------------------------------------------------------------------------|------------------------|------------------------|
|                     | 1990                                                                                                                               | 2000                   | 2015                   | 1990                                                                                                  | 2000                   | 2015                   | 1990                                                                                              | 2000                   | 2015                   | 1990                                                                                                   | 2000                   | 2015                   |
| Trinidad and Tobago | 51.71<br>(49.16-54.32)                                                                                                             | 57.05<br>(54.53-59.53) | 64.20<br>(60.91-67.16) | 55.26<br>(51.75-59.99)                                                                                | 65.46<br>(62.01-69.56) | 70.81<br>(67.22-74.84) | 66.57<br>(60.43-71.97)                                                                            | 69.74<br>(64.67-74.10) | 68.19<br>(63.50-72.84) | 73.01<br>(67.08-78.76)                                                                                 | 73.01<br>(67.08-78.76) | 73.01<br>(67.08-78.76) |
| Brazil              | 35.00<br>(32.41-38.35)                                                                                                             | 45.82<br>(43.51-48.48) | 55.80<br>(53.06-59.38) | 70.26<br>(67.68-74.16)                                                                                | 75.15<br>(72.86-77.63) | 82.95<br>(79.97-85.07) | 43.33<br>(38.69-47.86)                                                                            | 60.86<br>(57.72-64.10) | 76.17<br>(74.39-78.03) | 93.66<br>(90.95-96.00)                                                                                 | 93.83<br>(90.85-96.35) | 92.95<br>(90.89-94.72) |
| Paraguay            | 42.66<br>(39.63-45.93)                                                                                                             | 46.40<br>(43.60-49.63) | 56.19<br>(52.97-59.31) | 60.67<br>(56.46-65.04)                                                                                | 68.61<br>(62.75-72.31) | 75.71<br>(64.70-81.71) | 64.75<br>(57.65-71.13)                                                                            | 68.31<br>(63.68-72.45) | 76.76<br>(72.27-81.05) | 91.52<br>(89.05-93.90)                                                                                 | 89.39<br>(87.31-91.47) | 88.82<br>(86.42-91.09) |
| China               | 47.91<br>(45.40-50.52)                                                                                                             | 57.56<br>(55.24-59.75) | 74.51<br>(71.87-76.85) | 33.76<br>(29.63-39.17)                                                                                | 39.97<br>(36.62-45.19) | 50.12<br>(45.92-57.91) | 35.39<br>(32.09-38.69)                                                                            | 43.29<br>(40.46-46.31) | 51.64<br>(49.09-54.23) | 96.68<br>(95.30-97.90)                                                                                 | 96.97<br>(95.79-98.11) | 95.84<br>(94.26-97.13) |
| North Korea         | 54.47<br>(45.41-62.25)                                                                                                             | 59.12<br>(51.73-65.34) | 68.70<br>(63.42-73.70) | 41.18<br>(29.72-50.73)                                                                                | 41.89<br>(34.11-51.56) | 45.19<br>(38.51-55.74) | 50.42<br>(45.53-55.37)                                                                            | 50.55<br>(46.02-54.72) | 56.71<br>(52.08-61.05) | 96.46<br>(95.34-97.59)                                                                                 | 96.46<br>(95.34-97.59) | 96.46<br>(95.34-97.59) |
| Taiwan              | 63.79<br>(60.79-67.14)                                                                                                             | 69.00<br>(65.70-73.37) | 70.73<br>(65.11-80.63) | 57.78<br>(51.43-63.47)                                                                                | 64.25<br>(58.42-68.48) | 71.62<br>(66.93-75.53) | 45.22<br>(38.84-51.01)                                                                            | 50.03<br>(46.29-53.55) | 74.21<br>(70.60-77.50) | 96.46<br>(95.34-97.59)                                                                                 | 96.46<br>(95.34-97.59) | 96.46<br>(95.34-97.59) |
| Cambodia            | 17.44<br>(13.79-21.81)                                                                                                             | 22.45<br>(18.77-26.55) | 39.21<br>(35.64-43.09) | 43.00<br>(29.00-50.07)                                                                                | 47.14<br>(37.02-52.38) | 60.02<br>(52.70-65.35) | 44.26<br>(38.64-49.68)                                                                            | 44.93<br>(41.06-48.88) | 58.32<br>(54.44-61.91) | 83.84<br>(80.54-87.20)                                                                                 | 83.82<br>(80.80-86.86) | 83.59<br>(80.23-86.56) |
| Indonesia           | 18.66<br>(14.43-23.87)                                                                                                             | 24.10<br>(19.74-28.98) | 32.07<br>(27.85-36.55) | 60.17<br>(51.67-72.49)                                                                                | 64.11<br>(57.95-77.15) | 69.38<br>(62.80-82.41) | 44.99<br>(39.94-49.97)                                                                            | 39.38<br>(35.32-43.41) | 39.39<br>(34.05-44.26) | 73.00<br>(66.98-78.19)                                                                                 | 73.00<br>(66.98-78.19) | 73.00<br>(66.98-78.19) |
| Laos                | 13.82<br>(9.10-19.13)                                                                                                              | 21.24<br>(16.85-26.10) | 36.16<br>(32.03-40.08) | 37.01<br>(19.55-46.01)                                                                                | 42.10<br>(29.66-48.95) | 55.18<br>(45.99-61.52) | 28.52<br>(21.41-35.52)                                                                            | 28.73<br>(22.61-34.61) | 33.77<br>(26.25-41.22) | 73.00<br>(66.98-78.19)                                                                                 | 73.00<br>(66.98-78.19) | 73.00<br>(66.98-78.19) |
| Malaysia            | 43.34<br>(40.10-46.69)                                                                                                             | 46.85<br>(43.42-50.92) | 51.13<br>(46.40-56.70) | 51.06<br>(46.71-54.95)                                                                                | 54.82<br>(51.31-58.78) | 59.75<br>(55.20-64.43) | 51.47<br>(45.62-56.76)                                                                            | 54.50<br>(49.84-58.88) | 60.42<br>(55.69-64.82) | 73.00<br>(66.98-78.19)                                                                                 | 73.00<br>(66.98-78.19) | 73.00<br>(66.98-78.19) |
| Maldives            | 34.82<br>(30.45-39.43)                                                                                                             | 47.99<br>(45.11-51.15) | 61.84<br>(58.15-65.27) | 34.16<br>(24.66-41.06)                                                                                | 43.57<br>(39.12-47.06) | 58.35<br>(53.48-62.20) | 57.65<br>(51.25-63.46)                                                                            | 57.74<br>(52.01-63.35) | 55.62<br>(50.61-60.38) | 73.00<br>(66.98-78.19)                                                                                 | 73.00<br>(66.98-78.19) | 73.00<br>(66.98-78.19) |

**Appendix Table 1a. Scaled values for each SDG health-related indicator and three summary indicators by country for 1990, 2000, and 2015**

| Location                       | Indicator 3.9.2: Age-standardised death rate attributable to unsafe water, sanitation, and hygiene (WaSH) (per 100,000 population) |                        |                        | Indicator 3.9.3: Age-standardised death rate due to unintentional poisonings (per 100,000 population) |                        |                        | Indicator 3.a.1: Age-standardised prevalence of daily smoking among populations aged 10 and older |                        |                        | Indicator 5.2.1: Prevalence of women aged 15 years and older who experienced intimate partner violence |                        |                        |
|--------------------------------|------------------------------------------------------------------------------------------------------------------------------------|------------------------|------------------------|-------------------------------------------------------------------------------------------------------|------------------------|------------------------|---------------------------------------------------------------------------------------------------|------------------------|------------------------|--------------------------------------------------------------------------------------------------------|------------------------|------------------------|
|                                | 1990                                                                                                                               | 2000                   | 2015                   | 1990                                                                                                  | 2000                   | 2015                   | 1990                                                                                              | 2000                   | 2015                   | 1990                                                                                                   | 2000                   | 2015                   |
| Mauritius                      | 46.20<br>(43.45-49.27)                                                                                                             | 58.33<br>(55.57-60.81) | 64.37<br>(61.79-67.35) | 79.84<br>(77.10-82.72)                                                                                | 87.13<br>(84.66-89.43) | 93.20<br>(91.06-95.04) | 53.53<br>(48.37-58.16)                                                                            | 61.71<br>(58.20-65.05) | 63.88<br>(58.66-68.35) | 73.00<br>(66.98-78.19)                                                                                 | 73.00<br>(66.98-78.19) | 73.00<br>(66.98-78.19) |
| Myanmar                        | 16.37<br>(11.13-21.96)                                                                                                             | 23.52<br>(18.53-28.63) | 36.99<br>(31.96-41.87) | 40.89<br>(31.18-49.07)                                                                                | 44.10<br>(34.94-53.09) | 52.73<br>(44.47-60.91) | 44.55<br>(37.40-50.88)                                                                            | 50.45<br>(45.53-55.14) | 62.59<br>(58.36-66.61) | 64.44<br>(56.98-71.58)                                                                                 | 64.04<br>(56.76-70.87) | 64.44<br>(56.98-71.58) |
| Philippines                    | 34.16<br>(30.69-37.69)                                                                                                             | 38.28<br>(35.40-41.19) | 43.21<br>(40.18-46.33) | 75.89<br>(72.95-79.17)                                                                                | 77.12<br>(74.34-80.39) | 84.64<br>(81.99-87.54) | 43.33<br>(36.48-49.66)                                                                            | 43.58<br>(38.92-48.39) | 49.99<br>(43.83-55.48) | 89.20<br>(86.58-91.40)                                                                                 | 90.53<br>(88.26-92.54) | 87.51<br>(85.00-89.68) |
| Sri Lanka                      | 37.74<br>(34.19-41.03)                                                                                                             | 46.44<br>(43.20-50.20) | 60.28<br>(54.93-65.07) | 42.67<br>(39.40-47.48)                                                                                | 64.97<br>(57.98-68.99) | 77.32<br>(71.36-82.26) | 70.48<br>(66.18-74.52)                                                                            | 75.33<br>(72.51-77.99) | 77.78<br>(74.75-80.80) | 82.17<br>(78.22-85.93)                                                                                 | 83.44<br>(79.61-87.21) | 81.04<br>(77.44-84.35) |
| Seychelles                     | 43.98<br>(40.84-47.25)                                                                                                             | 50.14<br>(46.91-53.28) | 54.23<br>(50.81-57.96) | 52.17<br>(48.84-56.62)                                                                                | 59.56<br>(56.11-62.27) | 67.81<br>(62.81-71.58) | 66.63<br>(61.68-71.25)                                                                            | 66.78<br>(62.33-70.70) | 66.87<br>(62.09-71.40) | 73.00<br>(66.98-78.19)                                                                                 | 73.00<br>(66.98-78.19) | 73.00<br>(66.98-78.19) |
| Thailand                       | 38.25<br>(35.13-41.49)                                                                                                             | 44.93<br>(42.00-48.14) | 49.08<br>(44.95-54.10) | 58.03<br>(54.73-61.41)                                                                                | 61.09<br>(57.52-63.55) | 69.15<br>(64.94-73.20) | 43.99<br>(38.72-48.57)                                                                            | 55.80<br>(51.95-59.48) | 59.95<br>(55.13-64.39) | 57.47<br>(49.02-65.80)                                                                                 | 58.39<br>(50.56-65.99) | 57.47<br>(49.02-65.80) |
| Timor-Leste                    | 18.39<br>(12.89-25.61)                                                                                                             | 25.98<br>(20.85-32.68) | 41.55<br>(36.49-46.90) | 44.12<br>(24.46-54.93)                                                                                | 51.20<br>(37.40-60.05) | 62.92<br>(52.32-70.62) | 46.79<br>(41.07-52.76)                                                                            | 45.35<br>(39.88-51.00) | 36.75<br>(31.14-42.39) | 52.84<br>(42.97-62.13)                                                                                 | 47.50<br>(37.72-57.00) | 53.88<br>(45.88-61.99) |
| Vietnam                        | 41.05<br>(36.23-46.26)                                                                                                             | 48.13<br>(43.74-52.56) | 56.94<br>(52.58-61.32) | 46.74<br>(37.51-58.34)                                                                                | 51.27<br>(45.05-63.70) | 57.93<br>(48.99-72.48) | 36.31<br>(31.14-41.29)                                                                            | 46.73<br>(42.81-50.82) | 57.50<br>(52.85-62.02) | 63.76<br>(56.02-70.72)                                                                                 | 65.53<br>(58.18-72.76) | 63.74<br>(57.37-69.94) |
| Federated States of Micronesia | 36.03<br>(30.83-40.76)                                                                                                             | 43.41<br>(38.03-48.28) | 50.11<br>(43.96-55.39) | 45.44<br>(34.61-53.55)                                                                                | 50.26<br>(41.53-57.92) | 54.54<br>(45.28-62.17) | 64.07<br>(58.56-69.05)                                                                            | 66.54<br>(61.94-71.04) | 67.95<br>(62.94-72.34) | 53.67<br>(43.29-63.93)                                                                                 | 53.67<br>(43.29-63.93) | 53.67<br>(43.29-63.93) |
| Fiji                           | 38.32<br>(34.69-42.11)                                                                                                             | 40.32<br>(37.12-43.80) | 42.21<br>(38.37-45.93) | 61.04<br>(55.44-65.62)                                                                                | 60.30<br>(56.56-63.55) | 62.57<br>(58.01-66.87) | 71.75<br>(67.26-75.97)                                                                            | 72.56<br>(69.33-75.74) | 74.65<br>(70.97-78.00) | 53.67<br>(43.29-63.93)                                                                                 | 53.67<br>(43.29-63.93) | 53.67<br>(43.29-63.93) |
| Kiribati                       | 12.92<br>(8.63-17.63)                                                                                                              | 21.69<br>(17.73-26.07) | 29.41<br>(25.22-34.02) | 34.30<br>(27.43-45.62)                                                                                | 48.27<br>(40.40-52.18) | 49.41<br>(38.38-55.42) | 3.40<br>(0.00-10.25)                                                                              | 2.04<br>(0.00-6.87)    | 13.02<br>(5.25-20.95)  | 35.29<br>(24.49-47.12)                                                                                 | 35.29<br>(24.49-47.12) | 35.29<br>(24.49-47.12) |

**Appendix Table 1a. Scaled values for each SDG health-related indicator and three summary indicators by country for 1990, 2000, and 2015**

| Location         | Indicator 3.9.2: Age-standardised death rate attributable to unsafe water, sanitation, and hygiene (WaSH) (per 100,000 population) |                        |                        | Indicator 3.9.3: Age-standardised death rate due to unintentional poisonings (per 100,000 population) |                        |                        | Indicator 3.a.1: Age-standardised prevalence of daily smoking among populations aged 10 and older |                        |                        | Indicator 5.2.1: Prevalence of women aged 15 years and older who experienced intimate partner violence |                        |                        |
|------------------|------------------------------------------------------------------------------------------------------------------------------------|------------------------|------------------------|-------------------------------------------------------------------------------------------------------|------------------------|------------------------|---------------------------------------------------------------------------------------------------|------------------------|------------------------|--------------------------------------------------------------------------------------------------------|------------------------|------------------------|
|                  | 1990                                                                                                                               | 2000                   | 2015                   | 1990                                                                                                  | 2000                   | 2015                   | 1990                                                                                              | 2000                   | 2015                   | 1990                                                                                                   | 2000                   | 2015                   |
| Marshall Islands | 33.20<br>(29.55-36.81)                                                                                                             | 38.96<br>(35.31-42.59) | 47.18<br>(43.67-50.82) | 43.97<br>(33.86-49.86)                                                                                | 46.92<br>(38.80-52.43) | 52.20<br>(45.58-57.80) | 61.46<br>(55.60-66.87)                                                                            | 63.79<br>(59.71-67.85) | 67.95<br>(62.86-72.61) | 53.67<br>(43.29-63.93)                                                                                 | 53.67<br>(43.29-63.93) | 53.67<br>(43.29-63.93) |
| Papua New Guinea | 13.64<br>(8.42-19.38)                                                                                                              | 15.93<br>(10.79-21.59) | 20.89<br>(14.76-26.68) | 38.56<br>(27.05-48.16)                                                                                | 40.08<br>(28.93-49.34) | 44.31<br>(32.87-53.09) | 29.62<br>(22.18-37.15)                                                                            | 28.80<br>(21.90-35.39) | 36.44<br>(29.65-42.78) | 69.98<br>(61.70-77.56)                                                                                 | 69.98<br>(61.70-77.56) | 68.99<br>(60.77-77.08) |
| Samoa            | 41.97<br>(38.05-45.75)                                                                                                             | 47.54<br>(43.53-51.32) | 53.78<br>(49.56-57.75) | 50.12<br>(41.48-56.64)                                                                                | 54.14<br>(45.34-60.88) | 60.22<br>(50.47-66.77) | 29.22<br>(22.33-36.41)                                                                            | 35.02<br>(29.01-40.36) | 43.31<br>(36.57-49.61) | 49.01<br>(39.45-59.00)                                                                                 | 50.82<br>(41.73-59.82) | 49.01<br>(39.45-59.00) |
| Solomon Islands  | 25.29<br>(20.35-30.76)                                                                                                             | 32.05<br>(27.14-37.59) | 39.67<br>(34.05-45.10) | 39.06<br>(27.84-47.68)                                                                                | 42.06<br>(32.00-51.60) | 46.25<br>(37.28-55.37) | 48.90<br>(42.18-54.94)                                                                            | 52.14<br>(45.70-58.06) | 54.40<br>(48.79-59.98) | 48.26<br>(38.55-57.92)                                                                                 | 48.26<br>(38.55-57.92) | 48.26<br>(38.55-57.92) |
| Tonga            | 43.00<br>(39.40-46.77)                                                                                                             | 46.05<br>(42.81-49.52) | 51.18<br>(47.35-55.05) | 39.65<br>(32.41-45.45)                                                                                | 40.92<br>(35.67-45.31) | 43.51<br>(37.07-48.95) | 37.06<br>(30.93-43.04)                                                                            | 41.50<br>(35.92-46.80) | 41.65<br>(36.35-46.79) | 61.12<br>(53.46-68.29)                                                                                 | 61.12<br>(53.46-68.29) | 61.12<br>(53.46-68.29) |
| Vanuatu          | 28.99<br>(24.12-33.99)                                                                                                             | 33.50<br>(28.64-38.71) | 40.84<br>(35.72-45.44) | 41.40<br>(32.01-49.66)                                                                                | 42.66<br>(33.62-51.78) | 46.89<br>(38.51-55.13) | 53.25<br>(47.07-58.79)                                                                            | 60.06<br>(55.48-64.40) | 63.36<br>(58.79-67.57) | 53.67<br>(43.29-63.93)                                                                                 | 53.67<br>(43.29-63.93) | 53.67<br>(43.29-63.93) |
| Afghanistan      | 27.54<br>(21.39-36.83)                                                                                                             | 28.25<br>(23.18-35.37) | 38.40<br>(33.96-42.86) | 38.67<br>(24.45-48.96)                                                                                | 39.06<br>(29.62-48.04) | 43.70<br>(35.68-52.63) | 69.62<br>(64.12-74.86)                                                                            | 67.62<br>(61.99-72.89) | 66.07<br>(60.09-71.17) | 50.00<br>(40.10-59.64)                                                                                 | 50.00<br>(40.10-59.64) | 50.00<br>(40.10-59.64) |
| Algeria          | 41.01<br>(37.23-44.75)                                                                                                             | 49.82<br>(46.75-53.07) | 57.06<br>(54.04-60.23) | 45.93<br>(31.81-54.18)                                                                                | 51.91<br>(42.14-58.42) | 56.52<br>(46.18-64.11) | 62.37<br>(56.03-68.37)                                                                            | 68.86<br>(63.85-73.46) | 77.38<br>(73.16-80.95) | 50.00<br>(40.10-59.64)                                                                                 | 50.00<br>(40.10-59.64) | 50.00<br>(40.10-59.64) |
| Bahrain          | 57.65<br>(55.00-60.55)                                                                                                             | 62.75<br>(60.02-65.31) | 71.88<br>(68.39-75.44) | 58.42<br>(54.42-65.79)                                                                                | 64.87<br>(61.06-71.15) | 78.53<br>(74.09-82.59) | 70.39<br>(65.52-74.86)                                                                            | 77.53<br>(73.69-80.87) | 77.06<br>(72.80-80.99) | 50.00<br>(40.10-59.64)                                                                                 | 50.00<br>(40.10-59.64) | 50.00<br>(40.10-59.64) |
| Egypt            | 29.62<br>(26.26-33.55)                                                                                                             | 42.49<br>(39.44-45.61) | 56.25<br>(52.48-59.44) | 65.09<br>(54.17-69.12)                                                                                | 63.20<br>(59.90-67.54) | 64.53<br>(60.87-71.98) | 64.55<br>(59.42-69.63)                                                                            | 65.80<br>(61.53-70.23) | 61.90<br>(57.70-65.90) | 59.37<br>(51.64-67.38)                                                                                 | 57.81<br>(49.79-64.96) | 59.55<br>(52.80-66.16) |
| Iran             | 46.83<br>(42.17-51.44)                                                                                                             | 60.21<br>(56.83-63.31) | 67.13<br>(63.44-70.93) | 22.52<br>(12.51-30.44)                                                                                | 30.20<br>(25.97-35.76) | 41.21<br>(33.92-46.35) | 76.71<br>(72.25-80.50)                                                                            | 77.18<br>(73.55-80.53) | 76.91<br>(73.18-80.45) | 31.26<br>(20.10-43.89)                                                                                 | 29.47<br>(19.05-39.84) | 31.26<br>(20.10-43.89) |

**Appendix Table 1a. Scaled values for each SDG health-related indicator and three summary indicators by country for 1990, 2000, and 2015**

| Location     | Indicator 3.9.2: Age-standardised death rate attributable to unsafe water, sanitation, and hygiene (WaSH) (per 100,000 population) |                        |                        | Indicator 3.9.3: Age-standardised death rate due to unintentional poisonings (per 100,000 population) |                        |                         | Indicator 3.a.1: Age-standardised prevalence of daily smoking among populations aged 10 and older |                         |                         | Indicator 5.2.1: Prevalence of women aged 15 years and older who experienced intimate partner violence |                        |                        |
|--------------|------------------------------------------------------------------------------------------------------------------------------------|------------------------|------------------------|-------------------------------------------------------------------------------------------------------|------------------------|-------------------------|---------------------------------------------------------------------------------------------------|-------------------------|-------------------------|--------------------------------------------------------------------------------------------------------|------------------------|------------------------|
|              | 1990                                                                                                                               | 2000                   | 2015                   | 1990                                                                                                  | 2000                   | 2015                    | 1990                                                                                              | 2000                    | 2015                    | 1990                                                                                                   | 2000                   | 2015                   |
| Iraq         | 42.41<br>(38.60-46.39)                                                                                                             | 46.45<br>(43.04-50.34) | 56.55<br>(52.99-60.56) | 55.10<br>(41.29-62.35)                                                                                | 57.16<br>(49.21-62.46) | 64.51<br>(57.39-70.29)  | 65.83<br>(60.66-70.36)                                                                            | 66.99<br>(62.32-71.25)  | 69.04<br>(63.82-73.46)  | 77.90<br>(73.03-82.38)                                                                                 | 77.90<br>(73.03-82.38) | 77.90<br>(73.03-82.38) |
| Jordan       | 55.45<br>(52.20-58.74)                                                                                                             | 61.11<br>(57.92-63.94) | 71.30<br>(67.67-74.67) | 45.86<br>(34.29-54.46)                                                                                | 50.84<br>(43.48-58.22) | 63.90<br>(55.59-69.27)  | 52.15<br>(45.51-58.28)                                                                            | 51.53<br>(45.62-57.37)  | 54.61<br>(48.74-60.04)  | 66.78<br>(59.79-72.97)                                                                                 | 66.78<br>(59.79-72.97) | 65.18<br>(60.33-70.70) |
| Kuwait       | 63.03<br>(60.12-65.77)                                                                                                             | 65.69<br>(62.94-68.41) | 66.97<br>(63.59-70.40) | 65.36<br>(59.96-70.18)                                                                                | 77.30<br>(74.43-80.38) | 85.78<br>(82.71-89.09)  | 61.91<br>(56.68-67.22)                                                                            | 60.52<br>(55.18-66.16)  | 63.45<br>(59.27-67.40)  | 50.00<br>(40.10-59.64)                                                                                 | 50.00<br>(40.10-59.64) | 50.00<br>(40.10-59.64) |
| Lebanon      | 59.37<br>(54.78-63.62)                                                                                                             | 69.44<br>(65.19-73.90) | 81.53<br>(76.75-86.49) | 54.64<br>(43.20-63.61)                                                                                | 63.24<br>(53.01-71.50) | 73.12<br>(65.17-80.33)  | 26.19<br>(17.08-35.40)                                                                            | 35.20<br>(28.32-42.36)  | 44.85<br>(36.58-52.92)  | 50.00<br>(40.10-59.64)                                                                                 | 50.00<br>(40.10-59.64) | 50.00<br>(40.10-59.64) |
| Libya        | 51.46<br>(47.55-55.25)                                                                                                             | 58.33<br>(54.91-61.61) | 62.03<br>(58.15-65.81) | 52.78<br>(39.82-64.04)                                                                                | 57.71<br>(46.32-67.23) | 62.25<br>(53.76-70.50)  | 68.84<br>(63.68-73.68)                                                                            | 69.60<br>(64.72-74.01)  | 70.73<br>(66.40-74.73)  | 50.00<br>(40.10-59.64)                                                                                 | 50.00<br>(40.10-59.64) | 50.00<br>(40.10-59.64) |
| Morocco      | 34.72<br>(31.24-38.68)                                                                                                             | 49.33<br>(46.19-52.60) | 57.37<br>(53.25-61.18) | 45.07<br>(29.97-53.01)                                                                                | 52.44<br>(42.84-58.02) | 57.51<br>(51.18-63.14)  | 73.27<br>(68.82-77.53)                                                                            | 75.93<br>(72.72-78.88)  | 81.64<br>(78.00-84.98)  | 50.00<br>(40.10-59.64)                                                                                 | 50.00<br>(40.10-59.64) | 50.00<br>(40.10-59.64) |
| Palestine    | 54.22<br>(50.02-58.01)                                                                                                             | 59.81<br>(56.72-62.82) | 63.56<br>(58.14-68.06) | 69.71<br>(53.90-78.59)                                                                                | 77.07<br>(72.53-81.92) | 81.93<br>(76.34-86.60)  | 56.12<br>(50.83-61.06)                                                                            | 54.89<br>(51.56-57.98)  | 60.90<br>(55.75-65.54)  | 0.81<br>(0.00-6.73)                                                                                    | 18.51<br>(9.12-31.59)  | 39.26<br>(20.55-55.92) |
| Oman         | 48.10<br>(43.38-52.98)                                                                                                             | 54.67<br>(50.67-58.96) | 57.18<br>(52.72-61.79) | 86.50<br>(71.96-95.21)                                                                                | 93.77<br>(88.70-98.32) | 90.82<br>(85.35-100.00) | 80.65<br>(76.87-83.88)                                                                            | 85.05<br>(82.53-87.14)  | 84.26<br>(80.69-87.15)  | 50.00<br>(40.10-59.64)                                                                                 | 50.00<br>(40.10-59.64) | 50.00<br>(40.10-59.64) |
| Qatar        | 70.45<br>(66.11-74.21)                                                                                                             | 72.53<br>(68.64-76.40) | 80.16<br>(75.11-84.96) | 69.68<br>(58.06-76.39)                                                                                | 72.87<br>(67.75-76.99) | 81.70<br>(75.17-87.04)  | 75.48<br>(70.60-80.09)                                                                            | 80.60<br>(76.51-84.00)  | 77.60<br>(73.90-81.19)  | 50.00<br>(40.10-59.64)                                                                                 | 50.00<br>(40.10-59.64) | 50.00<br>(40.10-59.64) |
| Saudi Arabia | 48.70<br>(44.84-53.08)                                                                                                             | 55.91<br>(53.11-59.60) | 60.54<br>(57.13-64.61) | 47.43<br>(41.53-54.14)                                                                                | 54.03<br>(50.13-59.27) | 62.52<br>(58.60-66.08)  | 82.55<br>(80.87-84.28)                                                                            | 75.30<br>(73.13-77.39)  | 71.54<br>(69.33-73.58)  | 50.16<br>(40.07-59.47)                                                                                 | 50.16<br>(40.07-59.47) | 50.16<br>(40.07-59.47) |
| Sudan        | 25.63<br>(20.81-30.84)                                                                                                             | 31.23<br>(26.44-36.81) | 40.69<br>(35.31-45.90) | 34.18<br>(16.52-45.69)                                                                                | 39.61<br>(23.94-50.18) | 47.08<br>(34.13-57.02)  | 99.62<br>(98.98-100.00)                                                                           | 99.69<br>(99.15-100.00) | 99.76<br>(99.24-100.00) | 26.12<br>(13.86-40.09)                                                                                 | 26.12<br>(13.86-40.09) | 21.33<br>(10.26-33.13) |

**Appendix Table 1a. Scaled values for each SDG health-related indicator and three summary indicators by country for 1990, 2000, and 2015**

| Location             | Indicator 3.9.2: Age-standardised death rate attributable to unsafe water, sanitation, and hygiene (WaSH) (per 100,000 population) |                        |                        | Indicator 3.9.3: Age-standardised death rate due to unintentional poisonings (per 100,000 population) |                        |                        | Indicator 3.a.1: Age-standardised prevalence of daily smoking among populations aged 10 and older |                        |                        | Indicator 5.2.1: Prevalence of women aged 15 years and older who experienced intimate partner violence |                        |                        |
|----------------------|------------------------------------------------------------------------------------------------------------------------------------|------------------------|------------------------|-------------------------------------------------------------------------------------------------------|------------------------|------------------------|---------------------------------------------------------------------------------------------------|------------------------|------------------------|--------------------------------------------------------------------------------------------------------|------------------------|------------------------|
|                      | 1990                                                                                                                               | 2000                   | 2015                   | 1990                                                                                                  | 2000                   | 2015                   | 1990                                                                                              | 2000                   | 2015                   | 1990                                                                                                   | 2000                   | 2015                   |
| Syria                | 49.02<br>(43.89-54.85)                                                                                                             | 63.21<br>(55.31-67.67) | 68.05<br>(59.23-73.03) | 44.02<br>(38.32-51.84)                                                                                | 49.76<br>(43.86-58.72) | 60.38<br>(55.48-65.09) | 55.90<br>(48.52-62.58)                                                                            | 56.86<br>(50.42-62.28) | 65.48<br>(59.73-70.53) | 50.00<br>(40.10-59.64)                                                                                 | 50.00<br>(40.10-59.64) | 50.00<br>(40.10-59.64) |
| Tunisia              | 45.45<br>(41.65-49.11)                                                                                                             | 56.01<br>(52.89-59.21) | 64.29<br>(60.14-68.00) | 47.42<br>(30.94-57.16)                                                                                | 55.44<br>(42.76-63.33) | 66.68<br>(60.96-71.73) | 44.77<br>(38.82-50.80)                                                                            | 47.80<br>(43.48-52.20) | 54.38<br>(48.72-59.89) | 50.00<br>(40.10-59.64)                                                                                 | 50.00<br>(40.10-59.64) | 50.00<br>(40.10-59.64) |
| Turkey               | 39.68<br>(35.14-44.45)                                                                                                             | 56.28<br>(51.75-60.23) | 75.81<br>(72.12-79.03) | 56.17<br>(44.55-62.14)                                                                                | 64.51<br>(60.98-68.05) | 80.05<br>(74.78-83.64) | 24.63<br>(17.09-31.97)                                                                            | 31.63<br>(25.66-37.67) | 46.61<br>(40.95-51.85) | 51.61<br>(41.73-60.51)                                                                                 | 51.61<br>(41.73-60.51) | 53.43<br>(44.04-62.93) |
| United Arab Emirates | 46.70<br>(41.97-51.40)                                                                                                             | 51.59<br>(47.35-56.60) | 59.66<br>(54.77-66.53) | 54.14<br>(45.81-62.06)                                                                                | 60.07<br>(54.22-65.26) | 68.83<br>(62.98-74.88) | 74.93<br>(70.44-79.11)                                                                            | 75.92<br>(71.71-79.71) | 79.50<br>(75.37-83.60) | 50.00<br>(40.10-59.64)                                                                                 | 50.00<br>(40.10-59.64) | 50.00<br>(40.10-59.64) |
| Yemen                | 24.93<br>(19.81-32.22)                                                                                                             | 33.75<br>(28.49-41.80) | 43.99<br>(38.75-49.08) | 33.58<br>(17.62-44.88)                                                                                | 39.16<br>(25.39-50.62) | 46.73<br>(36.01-56.52) | 65.27<br>(59.07-70.78)                                                                            | 62.63<br>(57.47-67.33) | 70.79<br>(65.80-75.70) | 50.00<br>(40.10-59.64)                                                                                 | 50.00<br>(40.10-59.64) | 50.00<br>(40.10-59.64) |
| Bangladesh           | 5.31<br>(1.14-10.06)                                                                                                               | 21.59<br>(17.96-25.63) | 36.48<br>(32.70-40.46) | 61.86<br>(45.39-71.59)                                                                                | 71.72<br>(64.84-76.64) | 72.06<br>(63.22-83.13) | 52.10<br>(45.16-58.69)                                                                            | 53.51<br>(47.92-58.36) | 52.27<br>(46.41-57.81) | 26.25<br>(15.67-39.24)                                                                                 | 27.70<br>(17.77-40.24) | 27.64<br>(17.11-39.59) |
| Bhutan               | 20.61<br>(15.30-25.89)                                                                                                             | 27.47<br>(22.61-32.05) | 38.27<br>(33.47-43.05) | 54.93<br>(39.02-67.36)                                                                                | 58.48<br>(41.45-72.32) | 68.18<br>(54.52-80.98) | 85.22<br>(81.29-88.70)                                                                            | 86.07<br>(82.55-89.09) | 86.08<br>(83.63-88.20) | 52.95<br>(42.46-62.14)                                                                                 | 52.95<br>(42.46-62.14) | 52.95<br>(42.46-62.14) |
| India                | 15.53<br>(12.12-19.71)                                                                                                             | 19.93<br>(16.52-23.93) | 25.91<br>(22.39-29.89) | 44.46<br>(34.17-58.88)                                                                                | 49.87<br>(42.58-63.57) | 58.92<br>(53.70-72.35) | 60.68<br>(57.87-63.43)                                                                            | 61.23<br>(58.40-64.09) | 76.27<br>(74.75-77.73) | 42.91<br>(35.51-52.22)                                                                                 | 52.62<br>(46.59-60.21) | 44.49<br>(37.25-53.39) |
| Nepal                | 11.21<br>(7.08-15.92)                                                                                                              | 19.13<br>(15.21-23.01) | 29.40<br>(25.16-33.57) | 52.64<br>(32.32-63.46)                                                                                | 58.54<br>(45.15-70.19) | 66.82<br>(54.87-77.30) | 21.74<br>(10.83-32.30)                                                                            | 19.92<br>(13.36-26.93) | 53.40<br>(46.56-59.19) | 56.56<br>(47.19-65.30)                                                                                 | 56.56<br>(47.19-65.30) | 51.96<br>(44.92-58.77) |
| Pakistan             | 21.92<br>(18.07-25.85)                                                                                                             | 25.54<br>(22.04-29.16) | 33.52<br>(29.94-37.16) | 51.92<br>(35.16-62.76)                                                                                | 52.36<br>(40.62-61.75) | 56.89<br>(46.49-66.54) | 60.01<br>(53.01-66.56)                                                                            | 61.93<br>(56.27-66.87) | 75.15<br>(71.61-78.17) | 64.98<br>(56.86-72.25)                                                                                 | 64.98<br>(56.86-72.25) | 59.90<br>(54.01-66.05) |
| Botswana             | 19.50<br>(9.07-27.75)                                                                                                              | 21.71<br>(7.97-32.94)  | 29.46<br>(14.75-39.67) | 43.16<br>(24.92-58.70)                                                                                | 42.43<br>(18.10-60.70) | 48.66<br>(25.50-64.35) | 70.71<br>(66.90-74.21)                                                                            | 73.20<br>(69.84-76.31) | 73.94<br>(70.52-77.17) | 58.67<br>(49.80-66.67)                                                                                 | 56.03<br>(47.31-63.77) | 58.67<br>(49.80-66.67) |

**Appendix Table 1a. Scaled values for each SDG health-related indicator and three summary indicators by country for 1990, 2000, and 2015**

| Location      | Indicator 3.9.2: Age-standardised death rate attributable to unsafe water, sanitation, and hygiene (WaSH) (per 100,000 population) |                        |                        | Indicator 3.9.3: Age-standardised death rate due to unintentional poisonings (per 100,000 population) |                        |                        | Indicator 3.a.1: Age-standardised prevalence of daily smoking among populations aged 10 and older |                        |                        | Indicator 5.2.1: Prevalence of women aged 15 years and older who experienced intimate partner violence |                        |                        |
|---------------|------------------------------------------------------------------------------------------------------------------------------------|------------------------|------------------------|-------------------------------------------------------------------------------------------------------|------------------------|------------------------|---------------------------------------------------------------------------------------------------|------------------------|------------------------|--------------------------------------------------------------------------------------------------------|------------------------|------------------------|
|               | 1990                                                                                                                               | 2000                   | 2015                   | 1990                                                                                                  | 2000                   | 2015                   | 1990                                                                                              | 2000                   | 2015                   | 1990                                                                                                   | 2000                   | 2015                   |
| Lesotho       | 13.39<br>(8.51-18.46)                                                                                                              | 13.75<br>(8.62-19.06)  | 16.12<br>(9.50-22.78)  | 40.74<br>(29.66-50.85)                                                                                | 41.01<br>(31.49-49.65) | 37.79<br>(26.26-48.79) | 65.26<br>(61.63-68.78)                                                                            | 68.52<br>(65.47-71.40) | 67.65<br>(64.26-70.86) | 62.13<br>(54.08-69.40)                                                                                 | 59.57<br>(50.95-66.88) | 62.13<br>(54.08-69.40) |
| Namibia       | 16.17<br>(12.03-20.94)                                                                                                             | 16.53<br>(11.86-22.19) | 27.67<br>(21.46-34.03) | 42.31<br>(34.16-49.51)                                                                                | 40.22<br>(32.81-46.56) | 51.44<br>(40.66-61.29) | 59.34<br>(54.57-64.11)                                                                            | 60.77<br>(57.08-64.25) | 71.74<br>(68.32-74.87) | 64.33<br>(57.48-70.98)                                                                                 | 62.45<br>(54.81-70.13) | 67.59<br>(60.63-73.81) |
| South Africa  | 22.01<br>(18.96-25.79)                                                                                                             | 23.53<br>(20.29-27.36) | 31.87<br>(28.88-35.42) | 45.71<br>(42.02-51.95)                                                                                | 45.55<br>(41.76-50.57) | 54.69<br>(50.21-58.22) | 39.73<br>(35.76-43.30)                                                                            | 56.09<br>(53.53-58.58) | 65.89<br>(63.88-67.94) | 76.91<br>(73.38-80.66)                                                                                 | 78.08<br>(74.45-81.68) | 78.21<br>(74.59-81.81) |
| Swaziland     | 17.39<br>(12.90-22.22)                                                                                                             | 18.25<br>(13.14-23.28) | 22.38<br>(15.28-29.96) | 40.93<br>(30.89-49.73)                                                                                | 39.46<br>(28.55-48.44) | 41.15<br>(29.51-54.24) | 78.48<br>(75.74-81.09)                                                                            | 86.36<br>(84.46-88.15) | 88.19<br>(86.34-89.79) | 65.22<br>(57.76-72.08)                                                                                 | 62.89<br>(54.74-69.34) | 67.22<br>(60.66-73.29) |
| Zimbabwe      | 25.13<br>(21.41-29.47)                                                                                                             | 24.11<br>(18.22-29.60) | 25.43<br>(19.49-31.01) | 42.68<br>(34.64-49.23)                                                                                | 44.21<br>(33.22-52.29) | 48.01<br>(36.03-57.39) | 71.22<br>(67.57-74.57)                                                                            | 73.55<br>(70.61-76.28) | 75.18<br>(72.57-77.78) | 35.63<br>(24.10-47.66)                                                                                 | 35.22<br>(24.75-46.67) | 38.42<br>(28.38-49.85) |
| Benin         | 14.31<br>(9.85-19.72)                                                                                                              | 16.57<br>(12.20-21.78) | 23.55<br>(16.89-30.59) | 40.87<br>(21.41-49.85)                                                                                | 40.26<br>(25.55-49.17) | 44.32<br>(31.08-55.87) | 86.27<br>(83.12-88.83)                                                                            | 87.36<br>(84.89-89.63) | 90.05<br>(87.94-91.87) | 60.88<br>(52.70-68.92)                                                                                 | 60.88<br>(52.70-68.92) | 60.88<br>(52.70-68.92) |
| Burkina Faso  | 6.53<br>(2.17-11.53)                                                                                                               | 10.11<br>(5.90-15.02)  | 18.93<br>(12.74-24.80) | 34.27<br>(17.10-43.33)                                                                                | 38.75<br>(31.00-45.76) | 42.29<br>(29.79-52.71) | 77.89<br>(73.14-81.98)                                                                            | 79.56<br>(75.67-83.38) | 81.37<br>(77.72-84.54) | 84.24<br>(80.55-87.62)                                                                                 | 84.24<br>(80.55-87.62) | 84.32<br>(81.15-87.27) |
| Cameroon      | 14.69<br>(10.38-19.64)                                                                                                             | 15.71<br>(10.95-20.86) | 24.74<br>(18.56-31.02) | 43.02<br>(30.23-51.67)                                                                                | 41.27<br>(29.36-50.60) | 45.99<br>(31.72-58.18) | 85.55<br>(82.62-88.34)                                                                            | 87.05<br>(84.42-89.68) | 89.65<br>(87.84-91.32) | 25.71<br>(15.09-39.02)                                                                                 | 23.75<br>(14.05-35.55) | 22.66<br>(13.60-33.90) |
| Cape Verde    | 26.83<br>(23.19-30.81)                                                                                                             | 33.63<br>(29.24-38.27) | 42.84<br>(39.30-46.49) | 49.52<br>(38.48-58.48)                                                                                | 50.39<br>(40.80-57.87) | 59.30<br>(53.55-65.11) | 85.60<br>(82.50-88.36)                                                                            | 86.63<br>(84.00-88.97) | 87.02<br>(84.16-89.51) | 60.88<br>(52.70-68.92)                                                                                 | 60.88<br>(52.70-68.92) | 60.88<br>(52.70-68.92) |
| Chad          | 8.10<br>(3.60-13.29)                                                                                                               | 7.84<br>(3.16-12.90)   | 13.77<br>(7.71-20.48)  | 36.17<br>(12.99-48.53)                                                                                | 33.48<br>(14.87-44.86) | 38.84<br>(22.90-52.73) | 84.35<br>(81.37-87.05)                                                                            | 84.74<br>(82.22-87.19) | 85.40<br>(82.53-87.99) | 78.72<br>(73.98-83.04)                                                                                 | 78.72<br>(73.98-83.04) | 78.65<br>(74.43-82.22) |
| Cote d'Ivoire | 14.22<br>(10.13-19.08)                                                                                                             | 16.89<br>(12.31-21.50) | 23.20<br>(17.55-28.98) | 39.24<br>(26.76-47.18)                                                                                | 38.14<br>(26.52-46.33) | 43.28<br>(31.50-54.82) | 83.06<br>(79.44-86.21)                                                                            | 83.76<br>(80.74-86.30) | 82.14<br>(79.20-85.07) | 57.08<br>(47.81-66.29)                                                                                 | 57.08<br>(47.81-66.29) | 57.09<br>(48.95-64.93) |

**Appendix Table 1a. Scaled values for each SDG health-related indicator and three summary indicators by country for 1990, 2000, and 2015**

| Location              | Indicator 3.9.2: Age-standardised death rate attributable to unsafe water, sanitation, and hygiene (WaSH) (per 100,000 population) |                        |                        | Indicator 3.9.3: Age-standardised death rate due to unintentional poisonings (per 100,000 population) |                        |                        | Indicator 3.a.1: Age-standardised prevalence of daily smoking among populations aged 10 and older |                        |                        | Indicator 5.2.1: Prevalence of women aged 15 years and older who experienced intimate partner violence |                        |                        |
|-----------------------|------------------------------------------------------------------------------------------------------------------------------------|------------------------|------------------------|-------------------------------------------------------------------------------------------------------|------------------------|------------------------|---------------------------------------------------------------------------------------------------|------------------------|------------------------|--------------------------------------------------------------------------------------------------------|------------------------|------------------------|
|                       | 1990                                                                                                                               | 2000                   | 2015                   | 1990                                                                                                  | 2000                   | 2015                   | 1990                                                                                              | 2000                   | 2015                   | 1990                                                                                                   | 2000                   | 2015                   |
| The Gambia            | 20.22<br>(14.70-26.33)                                                                                                             | 23.46<br>(19.47-27.76) | 30.04<br>(25.27-34.75) | 44.78<br>(28.48-55.77)                                                                                | 44.86<br>(34.95-54.16) | 49.01<br>(39.21-59.57) | 70.50<br>(65.73-74.83)                                                                            | 73.80<br>(69.18-77.87) | 77.69<br>(74.30-80.95) | 66.29<br>(59.38-72.95)                                                                                 | 66.29<br>(59.38-72.95) | 66.05<br>(60.60-71.48) |
| Ghana                 | 15.46<br>(10.52-20.87)                                                                                                             | 22.12<br>(18.07-26.79) | 33.01<br>(26.21-39.18) | 44.36<br>(34.40-51.68)                                                                                | 49.26<br>(43.54-54.77) | 50.75<br>(40.72-60.10) | 90.97<br>(88.82-92.74)                                                                            | 91.42<br>(89.71-92.87) | 93.86<br>(92.46-95.22) | 69.40<br>(62.48-75.53)                                                                                 | 69.40<br>(62.48-75.53) | 69.40<br>(62.48-75.53) |
| Guinea                | 11.65<br>(7.63-16.42)                                                                                                              | 14.48<br>(10.35-19.10) | 21.13<br>(15.52-26.63) | 38.64<br>(22.83-48.08)                                                                                | 38.80<br>(25.87-46.91) | 42.18<br>(30.98-52.11) | 89.69<br>(87.13-91.83)                                                                            | 90.66<br>(88.40-92.73) | 91.55<br>(89.36-93.37) | 60.88<br>(52.70-68.92)                                                                                 | 60.88<br>(52.70-68.92) | 60.88<br>(52.70-68.92) |
| Guinea-Bissau         | 10.48<br>(2.78-17.96)                                                                                                              | 14.29<br>(5.41-22.41)  | 19.13<br>(9.10-26.89)  | 37.53<br>(17.62-52.71)                                                                                | 36.83<br>(19.39-52.78) | 38.65<br>(20.15-54.27) | 85.58<br>(82.45-88.42)                                                                            | 86.61<br>(83.62-89.13) | 86.69<br>(83.94-89.26) | 60.88<br>(52.70-68.92)                                                                                 | 60.88<br>(52.70-68.92) | 60.88<br>(52.70-68.92) |
| Liberia               | 9.63<br>(4.83-14.88)                                                                                                               | 12.63<br>(8.22-17.79)  | 20.75<br>(15.11-26.98) | 39.36<br>(22.92-49.34)                                                                                | 42.15<br>(26.89-52.73) | 48.03<br>(34.14-58.56) | 84.86<br>(81.53-87.52)                                                                            | 85.52<br>(82.74-88.04) | 87.98<br>(85.77-89.76) | 46.06<br>(35.79-56.58)                                                                                 | 46.06<br>(35.79-56.58) | 42.94<br>(32.44-52.77) |
| Mali                  | 8.13<br>(3.82-13.53)                                                                                                               | 13.67<br>(9.54-18.44)  | 21.11<br>(15.54-26.94) | 35.47<br>(19.24-44.58)                                                                                | 38.75<br>(22.91-48.52) | 43.89<br>(28.40-54.80) | 86.75<br>(83.99-89.21)                                                                            | 87.28<br>(84.56-89.77) | 87.76<br>(85.38-89.94) | 53.84<br>(44.25-63.19)                                                                                 | 53.84<br>(44.25-63.19) | 49.97<br>(40.89-58.35) |
| Mauritania            | 13.68<br>(9.43-18.63)                                                                                                              | 18.37<br>(14.21-23.18) | 28.07<br>(22.54-33.80) | 41.58<br>(26.78-50.46)                                                                                | 44.83<br>(30.86-55.02) | 52.09<br>(36.93-64.00) | 79.11<br>(74.96-82.57)                                                                            | 78.10<br>(74.71-81.21) | 80.37<br>(76.47-83.79) | 60.88<br>(52.70-68.92)                                                                                 | 60.88<br>(52.70-68.92) | 60.88<br>(52.70-68.92) |
| Niger                 | 4.20<br>(0.00-9.43)                                                                                                                | 7.85<br>(3.62-12.68)   | 16.13<br>(10.86-21.75) | 33.12<br>(11.08-45.02)                                                                                | 35.96<br>(19.61-46.83) | 42.01<br>(26.78-53.06) | 92.47<br>(90.26-94.29)                                                                            | 92.21<br>(90.04-94.09) | 91.20<br>(89.33-92.89) | 60.88<br>(52.70-68.92)                                                                                 | 60.88<br>(52.70-68.92) | 60.88<br>(52.70-68.92) |
| Nigeria               | 14.51<br>(9.53-20.00)                                                                                                              | 13.85<br>(9.79-18.40)  | 19.33<br>(14.05-24.73) | 40.60<br>(21.23-51.42)                                                                                | 43.28<br>(27.69-52.87) | 51.92<br>(35.48-62.59) | 81.72<br>(79.19-84.11)                                                                            | 89.57<br>(87.26-91.43) | 93.33<br>(91.79-94.80) | 74.96<br>(69.40-80.20)                                                                                 | 73.48<br>(67.70-78.68) | 74.72<br>(70.46-78.98) |
| Sao Tome and Principe | 21.50<br>(17.51-26.06)                                                                                                             | 24.22<br>(20.35-28.39) | 32.54<br>(26.71-38.90) | 49.13<br>(36.91-56.79)                                                                                | 50.64<br>(36.83-58.59) | 54.93<br>(42.96-66.89) | 92.48<br>(90.69-94.09)                                                                            | 93.14<br>(91.46-94.50) | 93.20<br>(91.58-94.68) | 53.28<br>(42.74-62.69)                                                                                 | 53.28<br>(42.74-62.69) | 53.28<br>(42.74-62.69) |
| Senegal               | 12.76<br>(8.60-17.29)                                                                                                              | 15.35<br>(11.24-19.90) | 23.24<br>(16.83-29.26) | 40.40<br>(26.57-48.46)                                                                                | 42.29<br>(30.69-50.11) | 45.89<br>(33.88-56.45) | 78.99<br>(75.28-82.79)                                                                            | 83.08<br>(80.14-85.91) | 90.22<br>(88.42-91.81) | 60.88<br>(52.70-68.92)                                                                                 | 60.88<br>(52.70-68.92) | 60.88<br>(52.70-68.92) |

**Appendix Table 1a. Scaled values for each SDG health-related indicator and three summary indicators by country for 1990, 2000, and 2015**

| Location     | Indicator 3.9.2: Age-standardised death rate attributable to unsafe water, sanitation, and hygiene (WaSH) (per 100,000 population) |                        |                        | Indicator 3.9.3: Age-standardised death rate due to unintentional poisonings (per 100,000 population) |                        |                        | Indicator 3.a.1: Age-standardised prevalence of daily smoking among populations aged 10 and older |                        |                        | Indicator 5.2.1: Prevalence of women aged 15 years and older who experienced intimate partner violence |                        |                        |
|--------------|------------------------------------------------------------------------------------------------------------------------------------|------------------------|------------------------|-------------------------------------------------------------------------------------------------------|------------------------|------------------------|---------------------------------------------------------------------------------------------------|------------------------|------------------------|--------------------------------------------------------------------------------------------------------|------------------------|------------------------|
|              | 1990                                                                                                                               | 2000                   | 2015                   | 1990                                                                                                  | 2000                   | 2015                   | 1990                                                                                              | 2000                   | 2015                   | 1990                                                                                                   | 2000                   | 2015                   |
| Sierra Leone | 12.67<br>(7.93-17.73)                                                                                                              | 13.40<br>(9.22-18.35)  | 21.38<br>(15.96-27.25) | 38.00<br>(19.40-48.64)                                                                                | 37.19<br>(21.76-45.56) | 42.46<br>(26.88-53.30) | 65.44<br>(59.69-70.47)                                                                            | 66.85<br>(61.33-71.49) | 70.64<br>(66.96-73.94) | 25.68<br>(15.32-39.61)                                                                                 | 25.68<br>(15.32-39.61) | 23.45<br>(13.72-34.81) |
| Togo         | 14.46<br>(10.27-19.28)                                                                                                             | 16.59<br>(12.13-21.72) | 23.97<br>(18.07-29.50) | 41.71<br>(28.24-49.02)                                                                                | 40.70<br>(28.78-48.46) | 45.63<br>(34.64-56.13) | 87.89<br>(85.23-90.23)                                                                            | 88.56<br>(86.19-90.76) | 89.58<br>(87.73-91.37) | 65.53<br>(57.82-72.67)                                                                                 | 65.53<br>(57.82-72.67) | 65.91<br>(59.84-71.46) |
| Burundi      | 5.30<br>(0.10-11.57)                                                                                                               | 6.05<br>(1.66-11.19)   | 16.00<br>(9.69-22.56)  | 22.50<br>(11.64-32.86)                                                                                | 25.81<br>(13.70-34.46) | 34.38<br>(21.44-45.23) | 85.80<br>(82.64-88.65)                                                                            | 87.68<br>(84.41-90.30) | 88.82<br>(86.29-91.03) | 53.26<br>(42.82-62.33)                                                                                 | 53.26<br>(42.82-62.33) | 53.26<br>(42.82-62.33) |
| Comoros      | 12.54<br>(6.32-18.65)                                                                                                              | 14.67<br>(10.29-19.32) | 20.40<br>(14.60-26.32) | 30.94<br>(17.31-42.35)                                                                                | 36.33<br>(24.48-45.04) | 42.89<br>(29.28-52.41) | 82.12<br>(78.39-85.86)                                                                            | 82.08<br>(78.19-85.62) | 83.10<br>(80.28-85.79) | 97.58<br>(96.53-98.48)                                                                                 | 97.58<br>(96.53-98.48) | 97.46<br>(96.37-98.55) |
| Djibouti     | 17.09<br>(11.29-22.44)                                                                                                             | 17.18<br>(10.28-24.42) | 22.30<br>(14.68-29.28) | 35.02<br>(18.55-47.22)                                                                                | 35.52<br>(21.14-49.27) | 39.25<br>(24.36-52.02) | 68.29<br>(62.69-73.15)                                                                            | 71.02<br>(66.11-75.37) | 71.81<br>(67.18-76.20) | 53.26<br>(42.82-62.33)                                                                                 | 53.26<br>(42.82-62.33) | 53.26<br>(42.82-62.33) |
| Eritrea      | 3.60<br>(0.00-8.61)                                                                                                                | 9.96<br>(3.77-16.96)   | 11.43<br>(3.67-19.44)  | 26.20<br>(12.64-35.49)                                                                                | 34.12<br>(19.78-45.29) | 33.49<br>(20.34-45.81) | 85.07<br>(81.48-88.13)                                                                            | 86.03<br>(83.47-88.39) | 88.64<br>(85.83-91.08) | 53.26<br>(42.82-62.33)                                                                                 | 53.26<br>(42.82-62.33) | 53.26<br>(42.82-62.33) |
| Ethiopia     | 4.68<br>(0.05-9.94)                                                                                                                | 9.08<br>(4.73-13.95)   | 20.49<br>(14.23-26.72) | 28.04<br>(13.92-36.63)                                                                                | 34.77<br>(21.00-41.81) | 44.29<br>(30.94-54.42) | 90.76<br>(88.48-92.69)                                                                            | 92.04<br>(90.21-93.70) | 92.28<br>(90.23-94.11) | 37.20<br>(25.70-49.10)                                                                                 | 36.64<br>(24.21-47.71) | 27.39<br>(16.07-38.58) |
| Kenya        | 7.35<br>(3.41-11.93)                                                                                                               | 8.64<br>(4.68-13.33)   | 12.99<br>(9.11-17.54)  | 36.18<br>(27.69-45.22)                                                                                | 36.85<br>(30.43-44.48) | 42.33<br>(35.62-48.65) | 77.49<br>(75.96-78.91)                                                                            | 77.52<br>(76.19-78.92) | 82.32<br>(81.16-83.46) | 67.24<br>(61.24-73.12)                                                                                 | 71.33<br>(64.39-77.63) | 67.79<br>(61.56-73.79) |
| Madagascar   | 12.93<br>(8.76-18.05)                                                                                                              | 16.83<br>(12.57-22.26) | 20.96<br>(14.85-27.41) | 33.41<br>(19.63-43.58)                                                                                | 37.08<br>(23.59-46.62) | 40.86<br>(27.98-52.19) | 62.36<br>(56.84-67.96)                                                                            | 64.87<br>(59.91-69.39) | 76.78<br>(72.69-80.94) | 53.26<br>(42.82-62.33)                                                                                 | 53.26<br>(42.82-62.33) | 53.26<br>(42.82-62.33) |
| Malawi       | 6.79<br>(2.14-11.91)                                                                                                               | 8.91<br>(3.58-14.82)   | 17.88<br>(11.51-24.18) | 31.79<br>(16.81-43.01)                                                                                | 32.92<br>(17.59-44.31) | 39.68<br>(24.28-51.20) | 74.57<br>(69.55-78.59)                                                                            | 74.59<br>(71.38-77.59) | 81.53<br>(78.18-84.42) | 67.74<br>(61.09-74.46)                                                                                 | 69.24<br>(63.35-75.01) | 66.92<br>(61.13-72.67) |
| Mozambique   | 10.30<br>(6.33-15.20)                                                                                                              | 13.77<br>(9.11-18.77)  | 19.86<br>(12.83-27.38) | 29.70<br>(15.41-38.55)                                                                                | 32.79<br>(23.86-38.70) | 38.60<br>(26.89-48.92) | 73.96<br>(69.59-77.95)                                                                            | 71.55<br>(67.77-75.15) | 77.89<br>(74.08-81.33) | 42.15<br>(30.92-53.75)                                                                                 | 44.02<br>(33.20-54.29) | 41.51<br>(32.08-51.13) |

**Appendix Table 1a. Scaled values for each SDG health-related indicator and three summary indicators by country for 1990, 2000, and 2015**

| Location                         | Indicator 3.9.2: Age-standardised death rate attributable to unsafe water, sanitation, and hygiene (WaSH) (per 100,000 population) |                        |                        | Indicator 3.9.3: Age-standardised death rate due to unintentional poisonings (per 100,000 population) |                        |                        | Indicator 3.a.1: Age-standardised prevalence of daily smoking among populations aged 10 and older |                        |                        | Indicator 5.2.1: Prevalence of women aged 15 years and older who experienced intimate partner violence |                        |                        |
|----------------------------------|------------------------------------------------------------------------------------------------------------------------------------|------------------------|------------------------|-------------------------------------------------------------------------------------------------------|------------------------|------------------------|---------------------------------------------------------------------------------------------------|------------------------|------------------------|--------------------------------------------------------------------------------------------------------|------------------------|------------------------|
|                                  | 1990                                                                                                                               | 2000                   | 2015                   | 1990                                                                                                  | 2000                   | 2015                   | 1990                                                                                              | 2000                   | 2015                   | 1990                                                                                                   | 2000                   | 2015                   |
| Rwanda                           | 14.12<br>(8.93-19.01)                                                                                                              | 13.62<br>(8.77-18.26)  | 26.36<br>(20.17-32.09) | 26.32<br>(12.94-34.96)                                                                                | 26.59<br>(14.20-34.97) | 39.00<br>(24.60-50.06) | 76.97<br>(72.91-80.98)                                                                            | 79.73<br>(76.39-82.70) | 82.89<br>(80.30-85.26) | 34.70<br>(23.93-47.00)                                                                                 | 36.92<br>(26.41-47.32) | 31.69<br>(21.95-42.84) |
| Somalia                          | 4.60<br>(0.00-12.17)                                                                                                               | 3.63<br>(0.00-12.43)   | 5.77<br>(0.00-14.90)   | 23.47<br>(2.79-41.59)                                                                                 | 23.70<br>(2.26-42.17)  | 27.20<br>(8.84-45.17)  | 77.73<br>(73.66-81.81)                                                                            | 79.97<br>(75.77-83.55) | 83.88<br>(80.40-86.96) | 53.26<br>(42.82-62.33)                                                                                 | 53.26<br>(42.82-62.33) | 53.26<br>(42.82-62.33) |
| South Sudan                      | 6.74<br>(0.00-14.87)                                                                                                               | 8.14<br>(0.00-17.58)   | 9.25<br>(0.00-18.73)   | 29.28<br>(11.48-46.84)                                                                                | 32.81<br>(13.45-50.14) | 33.16<br>(13.00-50.73) | 77.40<br>(73.15-81.33)                                                                            | 79.38<br>(75.27-83.01) | 83.48<br>(80.01-86.64) | 53.26<br>(42.82-62.33)                                                                                 | 53.26<br>(42.82-62.33) | 53.26<br>(42.82-62.33) |
| Tanzania                         | 9.56<br>(5.28-14.37)                                                                                                               | 12.75<br>(8.05-18.08)  | 19.82<br>(11.54-27.06) | 35.96<br>(19.05-44.76)                                                                                | 41.85<br>(35.34-47.91) | 43.13<br>(29.73-54.07) | 77.66<br>(73.41-81.65)                                                                            | 77.72<br>(74.04-81.27) | 80.44<br>(77.53-83.11) | 46.28<br>(34.80-56.17)                                                                                 | 48.23<br>(38.43-57.43) | 43.56<br>(35.10-52.33) |
| Uganda                           | 13.88<br>(8.61-19.35)                                                                                                              | 14.97<br>(9.87-20.27)  | 22.21<br>(15.33-29.52) | 30.23<br>(16.68-39.51)                                                                                | 31.32<br>(20.89-40.08) | 37.48<br>(24.13-48.87) | 78.93<br>(74.73-82.78)                                                                            | 78.99<br>(75.57-82.23) | 87.15<br>(85.08-89.02) | 22.87<br>(12.22-37.38)                                                                                 | 21.91<br>(11.18-34.26) | 18.22<br>(9.64-29.53)  |
| Zambia                           | 8.40<br>(4.15-13.43)                                                                                                               | 6.15<br>(1.56-11.48)   | 13.78<br>(7.47-20.30)  | 35.81<br>(18.11-46.00)                                                                                | 33.90<br>(20.15-44.33) | 38.03<br>(27.91-50.75) | 75.51<br>(71.13-79.33)                                                                            | 75.44<br>(72.15-78.48) | 79.53<br>(75.81-83.29) | 25.50<br>(14.22-39.05)                                                                                 | 20.72<br>(11.50-32.14) | 24.92<br>(14.82-36.59) |
| Angola                           | 12.07<br>(3.43-21.54)                                                                                                              | 16.41<br>(6.77-25.86)  | 24.45<br>(12.56-34.02) | 29.86<br>(11.79-46.21)                                                                                | 34.58<br>(15.58-51.53) | 41.33<br>(22.65-56.96) | 84.65<br>(82.20-86.89)                                                                            | 84.61<br>(81.86-86.89) | 82.71<br>(79.91-85.17) | 40.85<br>(30.52-52.15)                                                                                 | 40.85<br>(30.52-52.15) | 40.85<br>(30.52-52.15) |
| Central African Republic         | 10.81<br>(6.40-15.87)                                                                                                              | 12.77<br>(6.81-20.10)  | 14.42<br>(7.08-22.67)  | 30.01<br>(15.21-38.24)                                                                                | 31.02<br>(18.13-42.77) | 32.04<br>(19.02-45.08) | 86.89<br>(84.76-88.99)                                                                            | 87.28<br>(85.01-89.28) | 85.98<br>(83.47-88.21) | 74.12<br>(68.71-79.48)                                                                                 | 74.12<br>(68.71-79.48) | 74.12<br>(68.71-79.48) |
| Congo                            | 17.82<br>(11.72-24.12)                                                                                                             | 19.79<br>(14.35-25.73) | 27.60<br>(20.55-34.63) | 38.08<br>(26.98-46.34)                                                                                | 39.17<br>(26.79-47.45) | 46.91<br>(34.70-56.83) | 90.03<br>(88.22-91.70)                                                                            | 90.08<br>(88.46-91.66) | 86.91<br>(84.65-88.94) | 40.85<br>(30.52-52.15)                                                                                 | 40.85<br>(30.52-52.15) | 40.85<br>(30.52-52.15) |
| Democratic Republic of the Congo | 17.68<br>(12.70-23.00)                                                                                                             | 17.88<br>(13.72-22.30) | 22.67<br>(17.20-27.99) | 37.23<br>(21.21-48.07)                                                                                | 37.58<br>(23.37-46.76) | 42.21<br>(27.86-53.15) | 83.38<br>(80.88-85.72)                                                                            | 83.99<br>(81.49-86.40) | 83.61<br>(81.47-85.67) | 13.70<br>(4.13-28.62)                                                                                  | 13.70<br>(4.13-28.62)  | 11.74<br>(2.47-23.81)  |
| Equatorial Guinea                | 13.81<br>(5.45-23.02)                                                                                                              | 22.89<br>(12.67-31.84) | 34.02<br>(21.73-41.85) | 29.48<br>(13.63-46.36)                                                                                | 36.99<br>(18.49-54.34) | 48.37<br>(29.07-64.21) | 89.25<br>(87.17-91.00)                                                                            | 89.40<br>(87.43-91.13) | 89.27<br>(87.18-90.94) | 40.85<br>(30.52-52.15)                                                                                 | 40.85<br>(30.52-52.15) | 40.85<br>(30.52-52.15) |

**Appendix Table 1a. Scaled values for each SDG health-related indicator and three summary indicators by country for 1990, 2000, and 2015**

| Location | Indicator 3.9.2: Age-standardised death rate attributable to unsafe water, sanitation, and hygiene (WaSH) (per 100,000 population) |                        |                        | Indicator 3.9.3: Age-standardised death rate due to unintentional poisonings (per 100,000 population) |                        |                        | Indicator 3.a.1: Age-standardised prevalence of daily smoking among populations aged 10 and older |                        |                        | Indicator 5.2.1: Prevalence of women aged 15 years and older who experienced intimate partner violence |                        |                        |
|----------|------------------------------------------------------------------------------------------------------------------------------------|------------------------|------------------------|-------------------------------------------------------------------------------------------------------|------------------------|------------------------|---------------------------------------------------------------------------------------------------|------------------------|------------------------|--------------------------------------------------------------------------------------------------------|------------------------|------------------------|
|          | 1990                                                                                                                               | 2000                   | 2015                   | 1990                                                                                                  | 2000                   | 2015                   | 1990                                                                                              | 2000                   | 2015                   | 1990                                                                                                   | 2000                   | 2015                   |
| Gabon    | 21.58<br>(16.43-27.86)                                                                                                             | 25.31<br>(20.30-30.95) | 33.36<br>(26.24-39.95) | 41.95<br>(30.36-51.18)                                                                                | 44.91<br>(34.66-53.54) | 50.78<br>(38.45-61.05) | 83.17<br>(80.21-85.84)                                                                            | 81.92<br>(78.93-84.56) | 80.57<br>(77.79-83.06) | 27.24<br>(16.71-40.72)                                                                                 | 27.24<br>(16.71-40.72) | 24.45<br>(15.30-35.85) |

**Appendix Table 1a. Scaled values for each SDG health-related indicator and three summary indicators by country for 1990, 2000, and 2015**

| Location      | Indicator 6.1.1: Risk-weighted prevalence of populations using unsafe or unimproved water sources, as measured by the summary exposure value (SEV) for unsafe water |                           |                           | Indicator 6.2.2a: Risk-weighted prevalence of populations using unsafe or unimproved sanitation, as measured by the summary exposure value (SEV) for unsafe sanitation |                           |                           | Indicator 6.2.1b: Risk-weighted prevalence of populations with unsafe hygiene (no handwashing with soap), as measured by the summary exposure value (SEV) for unsafe hygiene |                        |                           | Indicator 7.1.2: Prevalence of household air pollution, as measured by the summary exposure value (SEV) for household air pollution |                           |                           |
|---------------|---------------------------------------------------------------------------------------------------------------------------------------------------------------------|---------------------------|---------------------------|------------------------------------------------------------------------------------------------------------------------------------------------------------------------|---------------------------|---------------------------|------------------------------------------------------------------------------------------------------------------------------------------------------------------------------|------------------------|---------------------------|-------------------------------------------------------------------------------------------------------------------------------------|---------------------------|---------------------------|
|               | 1990                                                                                                                                                                | 2000                      | 2015                      | 1990                                                                                                                                                                   | 2000                      | 2015                      | 1990                                                                                                                                                                         | 2000                   | 2015                      | 1990                                                                                                                                | 2000                      | 2015                      |
| Canada        | 100.00<br>(100.00-100.00)                                                                                                                                           | 100.00<br>(100.00-100.00) | 100.00<br>(100.00-100.00) | 100.00<br>(100.00-100.00)                                                                                                                                              | 100.00<br>(100.00-100.00) | 100.00<br>(100.00-100.00) | 83.98<br>(81.98-85.92)                                                                                                                                                       | 90.68<br>(89.51-91.81) | 100.00<br>(100.00-100.00) | 100.00<br>(100.00-100.00)                                                                                                           | 100.00<br>(100.00-100.00) | 100.00<br>(100.00-100.00) |
| United States | 100.00<br>(100.00-100.00)                                                                                                                                           | 100.00<br>(100.00-100.00) | 100.00<br>(100.00-100.00) | 100.00<br>(100.00-100.00)                                                                                                                                              | 100.00<br>(100.00-100.00) | 100.00<br>(100.00-100.00) | 83.84<br>(81.83-85.79)                                                                                                                                                       | 85.93<br>(84.17-87.65) | 94.72<br>(94.05-95.36)    | 100.00<br>(100.00-100.00)                                                                                                           | 100.00<br>(100.00-100.00) | 100.00<br>(100.00-100.00) |
| Australia     | 100.00<br>(100.00-100.00)                                                                                                                                           | 100.00<br>(100.00-100.00) | 100.00<br>(100.00-100.00) | 100.00<br>(100.00-100.00)                                                                                                                                              | 100.00<br>(100.00-100.00) | 100.00<br>(100.00-100.00) | 72.36<br>(68.96-75.68)                                                                                                                                                       | 83.42<br>(81.36-85.42) | 96.65<br>(96.22-97.04)    | 100.00<br>(100.00-100.00)                                                                                                           | 100.00<br>(100.00-100.00) | 100.00<br>(100.00-100.00) |
| New Zealand   | 100.00<br>(100.00-100.00)                                                                                                                                           | 100.00<br>(100.00-100.00) | 100.00<br>(100.00-100.00) | 100.00<br>(100.00-100.00)                                                                                                                                              | 100.00<br>(100.00-100.00) | 100.00<br>(100.00-100.00) | 72.37<br>(68.97-75.69)                                                                                                                                                       | 83.00<br>(80.89-85.05) | 96.27<br>(95.79-96.71)    | 100.00<br>(100.00-100.00)                                                                                                           | 100.00<br>(100.00-100.00) | 100.00<br>(100.00-100.00) |
| Brunei        | 100.00<br>(100.00-100.00)                                                                                                                                           | 100.00<br>(100.00-100.00) | 100.00<br>(100.00-100.00) | 100.00<br>(100.00-100.00)                                                                                                                                              | 100.00<br>(100.00-100.00) | 100.00<br>(100.00-100.00) | 65.00<br>(60.79-69.32)                                                                                                                                                       | 76.93<br>(74.06-79.70) | 91.86<br>(90.83-92.85)    | 100.00<br>(100.00-100.00)                                                                                                           | 100.00<br>(100.00-100.00) | 100.00<br>(100.00-100.00) |
| Japan         | 100.00<br>(100.00-100.00)                                                                                                                                           | 100.00<br>(100.00-100.00) | 100.00<br>(100.00-100.00) | 100.00<br>(100.00-100.00)                                                                                                                                              | 100.00<br>(100.00-100.00) | 100.00<br>(100.00-100.00) | 73.61<br>(70.35-76.77)                                                                                                                                                       | 84.56<br>(82.63-86.43) | 97.10<br>(96.73-97.44)    | 100.00<br>(100.00-100.00)                                                                                                           | 100.00<br>(100.00-100.00) | 100.00<br>(100.00-100.00) |
| Singapore     | 100.00<br>(100.00-100.00)                                                                                                                                           | 100.00<br>(100.00-100.00) | 100.00<br>(100.00-100.00) | 100.00<br>(100.00-100.00)                                                                                                                                              | 100.00<br>(100.00-100.00) | 100.00<br>(100.00-100.00) | 49.98<br>(44.27-56.12)                                                                                                                                                       | 66.86<br>(62.85-70.93) | 87.84<br>(86.33-89.31)    | 100.00<br>(100.00-100.00)                                                                                                           | 100.00<br>(100.00-100.00) | 100.00<br>(100.00-100.00) |
| South Korea   | 100.00<br>(100.00-100.00)                                                                                                                                           | 100.00<br>(100.00-100.00) | 100.00<br>(100.00-100.00) | 100.00<br>(100.00-100.00)                                                                                                                                              | 100.00<br>(100.00-100.00) | 100.00<br>(100.00-100.00) | 61.24<br>(56.52-66.04)                                                                                                                                                       | 74.82<br>(71.69-77.84) | 91.67<br>(90.62-92.68)    | 100.00<br>(100.00-100.00)                                                                                                           | 100.00<br>(100.00-100.00) | 100.00<br>(100.00-100.00) |
| Andorra       | 100.00<br>(100.00-100.00)                                                                                                                                           | 100.00<br>(100.00-100.00) | 100.00<br>(100.00-100.00) | 100.00<br>(100.00-100.00)                                                                                                                                              | 100.00<br>(100.00-100.00) | 100.00<br>(100.00-100.00) | 69.73<br>(66.05-73.42)                                                                                                                                                       | 81.02<br>(78.65-83.31) | 95.00<br>(94.37-95.61)    | 100.00<br>(100.00-100.00)                                                                                                           | 100.00<br>(100.00-100.00) | 100.00<br>(100.00-100.00) |
| Austria       | 100.00<br>(100.00-100.00)                                                                                                                                           | 100.00<br>(100.00-100.00) | 100.00<br>(100.00-100.00) | 100.00<br>(100.00-100.00)                                                                                                                                              | 100.00<br>(100.00-100.00) | 100.00<br>(100.00-100.00) | 57.74<br>(52.76-62.99)                                                                                                                                                       | 66.53<br>(62.50-70.65) | 82.07<br>(79.84-84.23)    | 100.00<br>(100.00-100.00)                                                                                                           | 100.00<br>(100.00-100.00) | 100.00<br>(100.00-100.00) |
| Belgium       | 100.00<br>(100.00-100.00)                                                                                                                                           | 100.00<br>(100.00-100.00) | 100.00<br>(100.00-100.00) | 100.00<br>(100.00-100.00)                                                                                                                                              | 100.00<br>(100.00-100.00) | 100.00<br>(100.00-100.00) | 62.56<br>(58.08-67.20)                                                                                                                                                       | 73.04<br>(69.72-76.28) | 89.19<br>(87.83-90.50)    | 100.00<br>(100.00-100.00)                                                                                                           | 100.00<br>(100.00-100.00) | 100.00<br>(100.00-100.00) |

**Appendix Table 1a. Scaled values for each SDG health-related indicator and three summary indicators by country for 1990, 2000, and 2015**

| Location   | Indicator 6.1.1: Risk-weighted prevalence of populations using unsafe or unimproved water sources, as measured by the summary exposure value (SEV) for unsafe water |                           |                           | Indicator 6.2.2a: Risk-weighted prevalence of populations using unsafe or unimproved sanitation, as measured by the summary exposure value (SEV) for unsafe sanitation |                           |                           | Indicator 6.2.1b: Risk-weighted prevalence of populations with unsafe hygiene (no handwashing with soap), as measured by the summary exposure value (SEV) for unsafe hygiene |                        |                        | Indicator 7.1.2: Prevalence of household air pollution, as measured by the summary exposure value (SEV) for household air pollution |                           |                           |
|------------|---------------------------------------------------------------------------------------------------------------------------------------------------------------------|---------------------------|---------------------------|------------------------------------------------------------------------------------------------------------------------------------------------------------------------|---------------------------|---------------------------|------------------------------------------------------------------------------------------------------------------------------------------------------------------------------|------------------------|------------------------|-------------------------------------------------------------------------------------------------------------------------------------|---------------------------|---------------------------|
|            | 1990                                                                                                                                                                | 2000                      | 2015                      | 1990                                                                                                                                                                   | 2000                      | 2015                      | 1990                                                                                                                                                                         | 2000                   | 2015                   | 1990                                                                                                                                | 2000                      | 2015                      |
| Cyprus     | 100.00<br>(100.00-100.00)                                                                                                                                           | 100.00<br>(100.00-100.00) | 100.00<br>(100.00-100.00) | 100.00<br>(100.00-100.00)                                                                                                                                              | 100.00<br>(100.00-100.00) | 100.00<br>(100.00-100.00) | 64.89<br>(60.66-69.22)                                                                                                                                                       | 77.00<br>(74.15-79.77) | 91.81<br>(90.78-92.81) | 100.00<br>(100.00-100.00)                                                                                                           | 100.00<br>(100.00-100.00) | 100.00<br>(100.00-100.00) |
| Denmark    | 100.00<br>(100.00-100.00)                                                                                                                                           | 100.00<br>(100.00-100.00) | 100.00<br>(100.00-100.00) | 100.00<br>(100.00-100.00)                                                                                                                                              | 100.00<br>(100.00-100.00) | 100.00<br>(100.00-100.00) | 69.84<br>(66.17-73.51)                                                                                                                                                       | 81.18<br>(78.83-83.44) | 93.42<br>(92.59-94.22) | 100.00<br>(100.00-100.00)                                                                                                           | 100.00<br>(100.00-100.00) | 100.00<br>(100.00-100.00) |
| Finland    | 100.00<br>(100.00-100.00)                                                                                                                                           | 100.00<br>(100.00-100.00) | 100.00<br>(100.00-100.00) | 100.00<br>(100.00-100.00)                                                                                                                                              | 100.00<br>(100.00-100.00) | 100.00<br>(100.00-100.00) | 68.47<br>(64.65-72.33)                                                                                                                                                       | 79.65<br>(77.13-82.10) | 93.52<br>(92.70-94.30) | 100.00<br>(100.00-100.00)                                                                                                           | 100.00<br>(100.00-100.00) | 100.00<br>(100.00-100.00) |
| France     | 100.00<br>(100.00-100.00)                                                                                                                                           | 100.00<br>(100.00-100.00) | 100.00<br>(100.00-100.00) | 100.00<br>(100.00-100.00)                                                                                                                                              | 100.00<br>(100.00-100.00) | 100.00<br>(100.00-100.00) | 54.23<br>(48.94-59.89)                                                                                                                                                       | 64.05<br>(59.73-68.50) | 81.54<br>(79.24-83.76) | 100.00<br>(100.00-100.00)                                                                                                           | 100.00<br>(100.00-100.00) | 100.00<br>(100.00-100.00) |
| Germany    | 100.00<br>(100.00-100.00)                                                                                                                                           | 100.00<br>(100.00-100.00) | 100.00<br>(100.00-100.00) | 100.00<br>(100.00-100.00)                                                                                                                                              | 100.00<br>(100.00-100.00) | 100.00<br>(100.00-100.00) | 59.56<br>(54.69-64.58)                                                                                                                                                       | 72.53<br>(69.16-75.83) | 88.82<br>(87.43-90.18) | 100.00<br>(100.00-100.00)                                                                                                           | 100.00<br>(100.00-100.00) | 100.00<br>(100.00-100.00) |
| Greece     | 100.00<br>(100.00-100.00)                                                                                                                                           | 100.00<br>(100.00-100.00) | 100.00<br>(100.00-100.00) | 100.00<br>(100.00-100.00)                                                                                                                                              | 100.00<br>(100.00-100.00) | 100.00<br>(100.00-100.00) | 55.40<br>(50.26-60.92)                                                                                                                                                       | 68.23<br>(64.38-72.12) | 85.14<br>(83.27-86.94) | 100.00<br>(100.00-100.00)                                                                                                           | 100.00<br>(100.00-100.00) | 100.00<br>(100.00-100.00) |
| Iceland    | 100.00<br>(100.00-100.00)                                                                                                                                           | 100.00<br>(100.00-100.00) | 100.00<br>(100.00-100.00) | 100.00<br>(100.00-100.00)                                                                                                                                              | 100.00<br>(100.00-100.00) | 100.00<br>(100.00-100.00) | 63.10<br>(58.67-67.66)                                                                                                                                                       | 75.25<br>(72.17-78.23) | 90.11<br>(88.86-91.31) | 100.00<br>(100.00-100.00)                                                                                                           | 100.00<br>(100.00-100.00) | 100.00<br>(100.00-100.00) |
| Ireland    | 100.00<br>(100.00-100.00)                                                                                                                                           | 100.00<br>(100.00-100.00) | 100.00<br>(100.00-100.00) | 100.00<br>(100.00-100.00)                                                                                                                                              | 100.00<br>(100.00-100.00) | 100.00<br>(100.00-100.00) | 63.78<br>(59.43-68.26)                                                                                                                                                       | 75.83<br>(72.82-78.74) | 90.41<br>(89.20-91.57) | 100.00<br>(100.00-100.00)                                                                                                           | 100.00<br>(100.00-100.00) | 100.00<br>(100.00-100.00) |
| Israel     | 100.00<br>(100.00-100.00)                                                                                                                                           | 100.00<br>(100.00-100.00) | 100.00<br>(100.00-100.00) | 100.00<br>(100.00-100.00)                                                                                                                                              | 100.00<br>(100.00-100.00) | 100.00<br>(100.00-100.00) | 76.19<br>(73.22-79.06)                                                                                                                                                       | 84.47<br>(82.54-86.35) | 96.99<br>(96.60-97.34) | 100.00<br>(100.00-100.00)                                                                                                           | 100.00<br>(100.00-100.00) | 100.00<br>(100.00-100.00) |
| Italy      | 100.00<br>(100.00-100.00)                                                                                                                                           | 100.00<br>(100.00-100.00) | 100.00<br>(100.00-100.00) | 100.00<br>(100.00-100.00)                                                                                                                                              | 100.00<br>(100.00-100.00) | 100.00<br>(100.00-100.00) | 61.83<br>(57.23-66.56)                                                                                                                                                       | 70.58<br>(67.00-74.16) | 85.85<br>(84.08-87.58) | 100.00<br>(100.00-100.00)                                                                                                           | 100.00<br>(100.00-100.00) | 100.00<br>(100.00-100.00) |
| Luxembourg | 100.00<br>(100.00-100.00)                                                                                                                                           | 100.00<br>(100.00-100.00) | 100.00<br>(100.00-100.00) | 100.00<br>(100.00-100.00)                                                                                                                                              | 100.00<br>(100.00-100.00) | 100.00<br>(100.00-100.00) | 56.41<br>(51.33-61.81)                                                                                                                                                       | 68.71<br>(64.93-72.54) | 85.50<br>(83.68-87.27) | 100.00<br>(100.00-100.00)                                                                                                           | 100.00<br>(100.00-100.00) | 100.00<br>(100.00-100.00) |

**Appendix Table 1a. Scaled values for each SDG health-related indicator and three summary indicators by country for 1990, 2000, and 2015**

| Location       | Indicator 6.1.1: Risk-weighted prevalence of populations using unsafe or unimproved water sources, as measured by the summary exposure value (SEV) for unsafe water |                           |                           | Indicator 6.2.2a: Risk-weighted prevalence of populations using unsafe or unimproved sanitation, as measured by the summary exposure value (SEV) for unsafe sanitation |                           |                           | Indicator 6.2.1b: Risk-weighted prevalence of populations with unsafe hygiene (no handwashing with soap), as measured by the summary exposure value (SEV) for unsafe hygiene |                        |                        | Indicator 7.1.2: Prevalence of household air pollution, as measured by the summary exposure value (SEV) for household air pollution |                           |                           |
|----------------|---------------------------------------------------------------------------------------------------------------------------------------------------------------------|---------------------------|---------------------------|------------------------------------------------------------------------------------------------------------------------------------------------------------------------|---------------------------|---------------------------|------------------------------------------------------------------------------------------------------------------------------------------------------------------------------|------------------------|------------------------|-------------------------------------------------------------------------------------------------------------------------------------|---------------------------|---------------------------|
|                | 1990                                                                                                                                                                | 2000                      | 2015                      | 1990                                                                                                                                                                   | 2000                      | 2015                      | 1990                                                                                                                                                                         | 2000                   | 2015                   | 1990                                                                                                                                | 2000                      | 2015                      |
| Malta          | 100.00<br>(100.00-100.00)                                                                                                                                           | 100.00<br>(100.00-100.00) | 100.00<br>(100.00-100.00) | 100.00<br>(100.00-100.00)                                                                                                                                              | 100.00<br>(100.00-100.00) | 100.00<br>(100.00-100.00) | 43.78<br>(37.41-50.60)                                                                                                                                                       | 52.03<br>(46.56-57.94) | 69.80<br>(66.13-73.49) | 100.00<br>(100.00-100.00)                                                                                                           | 100.00<br>(100.00-100.00) | 100.00<br>(100.00-100.00) |
| Netherlands    | 100.00<br>(100.00-100.00)                                                                                                                                           | 100.00<br>(100.00-100.00) | 100.00<br>(100.00-100.00) | 100.00<br>(100.00-100.00)                                                                                                                                              | 100.00<br>(100.00-100.00) | 100.00<br>(100.00-100.00) | 61.42<br>(56.74-66.20)                                                                                                                                                       | 72.34<br>(68.94-75.67) | 88.15<br>(86.67-89.58) | 100.00<br>(100.00-100.00)                                                                                                           | 100.00<br>(100.00-100.00) | 100.00<br>(100.00-100.00) |
| Norway         | 100.00<br>(100.00-100.00)                                                                                                                                           | 100.00<br>(100.00-100.00) | 100.00<br>(100.00-100.00) | 100.00<br>(100.00-100.00)                                                                                                                                              | 100.00<br>(100.00-100.00) | 100.00<br>(100.00-100.00) | 72.32<br>(68.93-75.65)                                                                                                                                                       | 84.87<br>(82.98-86.71) | 97.52<br>(97.20-97.81) | 100.00<br>(100.00-100.00)                                                                                                           | 100.00<br>(100.00-100.00) | 100.00<br>(100.00-100.00) |
| Portugal       | 100.00<br>(100.00-100.00)                                                                                                                                           | 100.00<br>(100.00-100.00) | 100.00<br>(100.00-100.00) | 100.00<br>(100.00-100.00)                                                                                                                                              | 100.00<br>(100.00-100.00) | 100.00<br>(100.00-100.00) | 35.27<br>(28.60-42.74)                                                                                                                                                       | 47.00<br>(40.95-53.50) | 67.54<br>(63.60-71.52) | 100.00<br>(100.00-100.00)                                                                                                           | 100.00<br>(100.00-100.00) | 100.00<br>(100.00-100.00) |
| Spain          | 100.00<br>(100.00-100.00)                                                                                                                                           | 100.00<br>(100.00-100.00) | 100.00<br>(100.00-100.00) | 100.00<br>(100.00-100.00)                                                                                                                                              | 100.00<br>(100.00-100.00) | 100.00<br>(100.00-100.00) | 45.16<br>(38.92-51.85)                                                                                                                                                       | 57.52<br>(52.53-62.79) | 77.44<br>(74.67-80.15) | 100.00<br>(100.00-100.00)                                                                                                           | 100.00<br>(100.00-100.00) | 100.00<br>(100.00-100.00) |
| Sweden         | 100.00<br>(100.00-100.00)                                                                                                                                           | 100.00<br>(100.00-100.00) | 100.00<br>(100.00-100.00) | 100.00<br>(100.00-100.00)                                                                                                                                              | 100.00<br>(100.00-100.00) | 100.00<br>(100.00-100.00) | 70.74<br>(67.17-74.30)                                                                                                                                                       | 81.87<br>(79.61-84.05) | 95.22<br>(94.62-95.80) | 100.00<br>(100.00-100.00)                                                                                                           | 100.00<br>(100.00-100.00) | 100.00<br>(100.00-100.00) |
| Switzerland    | 100.00<br>(100.00-100.00)                                                                                                                                           | 100.00<br>(100.00-100.00) | 100.00<br>(100.00-100.00) | 100.00<br>(100.00-100.00)                                                                                                                                              | 100.00<br>(100.00-100.00) | 100.00<br>(100.00-100.00) | 59.75<br>(54.89-64.75)                                                                                                                                                       | 71.90<br>(68.46-75.29) | 86.66<br>(84.99-88.29) | 100.00<br>(100.00-100.00)                                                                                                           | 100.00<br>(100.00-100.00) | 100.00<br>(100.00-100.00) |
| United Kingdom | 100.00<br>(100.00-100.00)                                                                                                                                           | 100.00<br>(100.00-100.00) | 100.00<br>(100.00-100.00) | 100.00<br>(100.00-100.00)                                                                                                                                              | 100.00<br>(100.00-100.00) | 100.00<br>(100.00-100.00) | 67.69<br>(63.82-71.64)                                                                                                                                                       | 79.21<br>(76.69-81.70) | 93.29<br>(92.46-94.11) | 100.00<br>(100.00-100.00)                                                                                                           | 100.00<br>(100.00-100.00) | 100.00<br>(100.00-100.00) |
| Argentina      | 57.56<br>(45.42-68.66)                                                                                                                                              | 79.02<br>(69.83-86.35)    | 88.52<br>(78.38-94.77)    | 68.85<br>(55.96-79.84)                                                                                                                                                 | 84.47<br>(79.91-88.21)    | 92.48<br>(86.71-96.22)    | 51.40<br>(45.11-57.77)                                                                                                                                                       | 61.18<br>(55.51-66.70) | 77.76<br>(72.08-81.74) | 95.74<br>(91.49-98.31)                                                                                                              | 97.35<br>(94.66-98.91)    | 99.20<br>(96.84-99.91)    |
| Chile          | 82.85<br>(76.67-87.77)                                                                                                                                              | 88.70<br>(84.06-92.55)    | 93.76<br>(89.31-96.70)    | 71.26<br>(64.46-77.45)                                                                                                                                                 | 90.06<br>(86.34-92.56)    | 95.27<br>(92.26-97.35)    | 52.18<br>(45.72-58.58)                                                                                                                                                       | 63.80<br>(57.87-69.29) | 81.92<br>(76.77-85.59) | 90.27<br>(80.46-96.15)                                                                                                              | 92.95<br>(85.74-97.11)    | 98.49<br>(94.15-99.84)    |
| Uruguay        | 90.08<br>(81.15-95.57)                                                                                                                                              | 93.57<br>(89.66-96.51)    | 95.33<br>(90.96-97.94)    | 94.21<br>(89.31-97.31)                                                                                                                                                 | 95.79<br>(93.22-97.43)    | 96.73<br>(94.22-98.31)    | 43.85<br>(37.16-50.71)                                                                                                                                                       | 51.12<br>(44.60-57.63) | 67.01<br>(61.79-71.81) | 97.48<br>(90.38-99.68)                                                                                                              | 99.01<br>(97.86-99.65)    | 99.56<br>(98.36-99.95)    |

**Appendix Table 1a. Scaled values for each SDG health-related indicator and three summary indicators by country for 1990, 2000, and 2015**

| Location               | Indicator 6.1.1: Risk-weighted prevalence of populations using unsafe or unimproved water sources, as measured by the summary exposure value (SEV) for unsafe water |                        |                        | Indicator 6.2.2a: Risk-weighted prevalence of populations using unsafe or unimproved sanitation, as measured by the summary exposure value (SEV) for unsafe sanitation |                        |                        | Indicator 6.2.1b: Risk-weighted prevalence of populations with unsafe hygiene (no handwashing with soap), as measured by the summary exposure value (SEV) for unsafe hygiene |                        |                        | Indicator 7.1.2: Prevalence of household air pollution, as measured by the summary exposure value (SEV) for household air pollution |                        |                        |
|------------------------|---------------------------------------------------------------------------------------------------------------------------------------------------------------------|------------------------|------------------------|------------------------------------------------------------------------------------------------------------------------------------------------------------------------|------------------------|------------------------|------------------------------------------------------------------------------------------------------------------------------------------------------------------------------|------------------------|------------------------|-------------------------------------------------------------------------------------------------------------------------------------|------------------------|------------------------|
|                        | 1990                                                                                                                                                                | 2000                   | 2015                   | 1990                                                                                                                                                                   | 2000                   | 2015                   | 1990                                                                                                                                                                         | 2000                   | 2015                   | 1990                                                                                                                                | 2000                   | 2015                   |
| Belarus                | 66.70<br>(50.09-80.32)                                                                                                                                              | 74.19<br>(70.33-77.74) | 85.06<br>(79.36-89.41) | 66.55<br>(52.60-79.60)                                                                                                                                                 | 71.88<br>(67.38-75.71) | 84.07<br>(78.99-88.36) | 37.69<br>(27.00-47.15)                                                                                                                                                       | 44.83<br>(30.88-56.73) | 68.09<br>(50.55-81.40) | 85.60<br>(70.37-94.96)                                                                                                              | 94.39<br>(88.41-97.71) | 99.40<br>(98.77-99.75) |
| Estonia                | 80.04<br>(64.55-90.63)                                                                                                                                              | 85.26<br>(76.69-91.09) | 90.28<br>(80.08-95.79) | 80.91<br>(67.43-90.56)                                                                                                                                                 | 86.93<br>(79.34-92.31) | 92.46<br>(86.06-96.68) | 40.89<br>(29.43-50.28)                                                                                                                                                       | 48.44<br>(35.36-59.53) | 66.45<br>(50.61-78.11) | 79.59<br>(61.44-91.66)                                                                                                              | 85.52<br>(74.72-92.79) | 94.30<br>(87.07-98.27) |
| Latvia                 | 80.00<br>(65.26-90.43)                                                                                                                                              | 83.25<br>(75.73-88.75) | 89.06<br>(79.61-95.19) | 74.56<br>(59.35-86.13)                                                                                                                                                 | 78.70<br>(69.94-85.28) | 88.12<br>(78.60-94.33) | 43.81<br>(32.15-53.54)                                                                                                                                                       | 48.62<br>(34.40-60.32) | 66.00<br>(49.19-78.31) | 84.57<br>(66.84-94.45)                                                                                                              | 90.52<br>(82.86-95.20) | 95.58<br>(88.88-98.64) |
| Lithuania              | 76.63<br>(59.56-89.09)                                                                                                                                              | 79.16<br>(61.50-90.23) | 86.18<br>(74.13-93.97) | 72.88<br>(55.98-85.82)                                                                                                                                                 | 77.91<br>(61.63-88.93) | 86.54<br>(75.64-94.22) | 44.19<br>(32.08-54.12)                                                                                                                                                       | 49.29<br>(35.37-60.69) | 65.71<br>(50.05-77.35) | 85.42<br>(70.00-95.15)                                                                                                              | 90.87<br>(79.65-97.06) | 96.00<br>(90.50-98.75) |
| Moldova                | 53.12<br>(36.02-68.96)                                                                                                                                              | 46.05<br>(38.39-52.60) | 56.88<br>(40.35-73.22) | 48.61<br>(29.09-64.94)                                                                                                                                                 | 41.45<br>(33.69-49.80) | 55.80<br>(39.39-70.20) | 33.79<br>(22.69-44.06)                                                                                                                                                       | 34.37<br>(21.51-46.72) | 48.69<br>(32.21-63.51) | 64.93<br>(45.93-81.92)                                                                                                              | 74.35<br>(64.18-83.05) | 94.88<br>(90.48-97.70) |
| Russia                 | 78.24<br>(62.27-89.66)                                                                                                                                              | 80.18<br>(72.51-86.31) | 85.77<br>(73.88-93.60) | 66.35<br>(49.67-80.53)                                                                                                                                                 | 67.61<br>(59.37-75.02) | 79.44<br>(66.13-89.17) | 49.63<br>(37.21-59.63)                                                                                                                                                       | 53.15<br>(38.35-65.20) | 68.97<br>(51.98-81.37) | 89.26<br>(75.75-96.61)                                                                                                              | 92.82<br>(86.76-96.76) | 97.67<br>(94.50-99.34) |
| Ukraine                | 77.11<br>(61.22-88.56)                                                                                                                                              | 78.11<br>(70.75-84.35) | 76.68<br>(69.51-83.39) | 69.61<br>(55.28-82.50)                                                                                                                                                 | 70.93<br>(63.28-77.73) | 78.32<br>(72.16-83.61) | 41.49<br>(29.61-51.44)                                                                                                                                                       | 46.52<br>(31.28-60.11) | 64.69<br>(45.32-80.26) | 84.89<br>(70.21-94.32)                                                                                                              | 93.63<br>(88.98-96.86) | 97.44<br>(94.77-98.88) |
| Albania                | 56.01<br>(33.74-72.47)                                                                                                                                              | 59.19<br>(39.96-71.63) | 68.08<br>(48.34-81.69) | 80.60<br>(65.85-89.86)                                                                                                                                                 | 87.00<br>(83.08-90.36) | 96.88<br>(94.72-98.30) | 19.44<br>(11.51-28.17)                                                                                                                                                       | 23.65<br>(13.87-34.18) | 37.61<br>(23.26-50.86) | 45.47<br>(33.81-57.01)                                                                                                              | 52.38<br>(41.17-62.70) | 86.35<br>(79.32-91.47) |
| Bosnia and Herzegovina | 60.65<br>(39.00-76.31)                                                                                                                                              | 71.09<br>(50.26-82.74) | 76.94<br>(57.29-87.59) | 69.47<br>(50.26-83.95)                                                                                                                                                 | 87.59<br>(82.36-91.42) | 91.29<br>(85.13-95.20) | 12.70<br>(6.90-19.51)                                                                                                                                                        | 21.39<br>(12.56-30.95) | 35.42<br>(21.91-48.22) | 46.54<br>(34.16-57.72)                                                                                                              | 59.95<br>(50.44-68.89) | 60.86<br>(50.33-69.95) |
| Bulgaria               | 74.03<br>(55.17-86.34)                                                                                                                                              | 76.83<br>(56.78-89.07) | 79.93<br>(60.36-90.88) | 85.16<br>(71.76-93.23)                                                                                                                                                 | 91.70<br>(84.30-96.46) | 95.15<br>(90.19-97.85) | 31.79<br>(19.99-42.93)                                                                                                                                                       | 34.44<br>(21.27-47.16) | 47.80<br>(30.99-62.31) | 86.11<br>(78.45-92.28)                                                                                                              | 90.63<br>(84.63-94.69) | 95.28<br>(92.06-97.52) |
| Croatia                | 75.65<br>(55.01-87.89)                                                                                                                                              | 78.06<br>(59.24-88.24) | 81.13<br>(62.09-91.19) | 91.82<br>(85.29-96.04)                                                                                                                                                 | 94.86<br>(92.24-96.91) | 96.79<br>(93.69-98.53) | 24.58<br>(16.03-33.21)                                                                                                                                                       | 29.29<br>(18.77-39.55) | 42.67<br>(28.35-55.19) | 76.02<br>(65.30-84.93)                                                                                                              | 87.77<br>(83.32-91.44) | 94.13<br>(90.39-96.76) |

**Appendix Table 1a. Scaled values for each SDG health-related indicator and three summary indicators by country for 1990, 2000, and 2015**

| Location       | Indicator 6.1.1: Risk-weighted prevalence of populations using unsafe or unimproved water sources, as measured by the summary exposure value (SEV) for unsafe water |                        |                        | Indicator 6.2.2a: Risk-weighted prevalence of populations using unsafe or unimproved sanitation, as measured by the summary exposure value (SEV) for unsafe sanitation |                        |                        | Indicator 6.2.1b: Risk-weighted prevalence of populations with unsafe hygiene (no handwashing with soap), as measured by the summary exposure value (SEV) for unsafe hygiene |                        |                        | Indicator 7.1.2: Prevalence of household air pollution, as measured by the summary exposure value (SEV) for household air pollution |                        |                        |
|----------------|---------------------------------------------------------------------------------------------------------------------------------------------------------------------|------------------------|------------------------|------------------------------------------------------------------------------------------------------------------------------------------------------------------------|------------------------|------------------------|------------------------------------------------------------------------------------------------------------------------------------------------------------------------------|------------------------|------------------------|-------------------------------------------------------------------------------------------------------------------------------------|------------------------|------------------------|
|                | 1990                                                                                                                                                                | 2000                   | 2015                   | 1990                                                                                                                                                                   | 2000                   | 2015                   | 1990                                                                                                                                                                         | 2000                   | 2015                   | 1990                                                                                                                                | 2000                   | 2015                   |
| Czech Republic | 83.18<br>(64.58-92.79)                                                                                                                                              | 84.99<br>(66.82-93.67) | 85.59<br>(67.98-94.05) | 98.23<br>(96.34-99.26)                                                                                                                                                 | 99.10<br>(98.31-99.59) | 99.32<br>(98.60-99.73) | 40.78<br>(27.04-52.94)                                                                                                                                                       | 46.77<br>(31.09-60.31) | 57.99<br>(39.63-73.29) | 96.77<br>(94.57-98.31)                                                                                                              | 98.34<br>(97.47-98.96) | 98.88<br>(98.04-99.42) |
| Hungary        | 75.50<br>(58.44-85.06)                                                                                                                                              | 83.00<br>(64.63-91.72) | 84.79<br>(66.89-93.51) | 76.23<br>(69.49-81.86)                                                                                                                                                 | 87.26<br>(82.57-90.84) | 93.26<br>(87.60-96.87) | 34.03<br>(22.18-45.07)                                                                                                                                                       | 38.79<br>(25.59-51.03) | 51.38<br>(35.05-65.62) | 85.82<br>(77.71-91.82)                                                                                                              | 89.25<br>(83.02-94.06) | 94.62<br>(90.63-97.13) |
| Macedonia      | 76.42<br>(56.13-88.16)                                                                                                                                              | 78.27<br>(59.01-88.82) | 78.83<br>(57.89-89.72) | 90.47<br>(80.73-96.05)                                                                                                                                                 | 92.65<br>(86.94-96.04) | 93.25<br>(89.86-95.78) | 24.35<br>(15.21-33.70)                                                                                                                                                       | 28.54<br>(17.62-39.55) | 40.57<br>(25.88-54.50) | 61.04<br>(49.50-72.21)                                                                                                              | 71.53<br>(62.18-80.11) | 81.72<br>(75.10-87.24) |
| Montenegro     | 68.72<br>(49.06-82.10)                                                                                                                                              | 72.93<br>(54.87-85.26) | 78.74<br>(59.36-89.29) | 86.55<br>(67.11-96.32)                                                                                                                                                 | 88.78<br>(79.00-94.97) | 94.63<br>(86.72-98.50) | 28.09<br>(17.75-38.24)                                                                                                                                                       | 32.43<br>(20.25-44.30) | 46.15<br>(29.61-60.61) | 55.49<br>(43.17-67.14)                                                                                                              | 72.79<br>(62.73-81.23) | 74.09<br>(67.06-80.52) |
| Poland         | 74.34<br>(55.21-86.49)                                                                                                                                              | 79.77<br>(61.60-90.31) | 82.52<br>(64.02-92.17) | 85.33<br>(72.92-93.08)                                                                                                                                                 | 94.22<br>(89.13-97.30) | 96.84<br>(93.63-98.61) | 34.12<br>(21.39-46.32)                                                                                                                                                       | 41.63<br>(26.78-55.13) | 55.69<br>(37.48-71.07) | 87.67<br>(80.30-93.13)                                                                                                              | 92.05<br>(87.28-95.63) | 94.39<br>(90.54-97.05) |
| Romania        | 57.44<br>(37.57-74.37)                                                                                                                                              | 56.37<br>(41.75-67.73) | 69.91<br>(50.76-83.48) | 61.75<br>(53.15-69.52)                                                                                                                                                 | 61.59<br>(54.03-69.02) | 79.54<br>(67.74-89.41) | 30.41<br>(19.02-41.49)                                                                                                                                                       | 32.81<br>(20.45-45.31) | 46.46<br>(30.38-60.84) | 75.92<br>(65.91-84.99)                                                                                                              | 80.21<br>(75.19-84.63) | 89.02<br>(82.67-93.68) |
| Serbia         | 62.91<br>(40.24-79.07)                                                                                                                                              | 67.60<br>(45.84-82.19) | 73.89<br>(52.28-85.49) | 78.28<br>(54.80-91.61)                                                                                                                                                 | 77.85<br>(65.81-87.05) | 85.21<br>(77.88-90.53) | 24.96<br>(15.73-34.55)                                                                                                                                                       | 29.26<br>(18.07-40.54) | 42.81<br>(27.32-57.51) | 61.52<br>(52.73-69.33)                                                                                                              | 69.23<br>(59.43-78.05) | 78.12<br>(72.39-82.91) |
| Slovakia       | 77.07<br>(58.18-87.97)                                                                                                                                              | 81.32<br>(63.39-90.89) | 84.06<br>(66.27-92.84) | 93.38<br>(87.57-96.84)                                                                                                                                                 | 96.56<br>(94.00-98.25) | 98.03<br>(96.07-99.08) | 31.32<br>(20.25-41.98)                                                                                                                                                       | 37.47<br>(24.28-49.44) | 52.55<br>(35.62-66.79) | 93.01<br>(88.89-96.06)                                                                                                              | 97.18<br>(95.76-98.14) | 98.12<br>(96.76-99.02) |
| Slovenia       | 84.29<br>(66.56-92.66)                                                                                                                                              | 86.29<br>(69.25-94.28) | 86.81<br>(67.66-94.65) | 92.20<br>(81.07-97.30)                                                                                                                                                 | 94.63<br>(92.56-96.26) | 96.53<br>(91.58-98.89) | 34.50<br>(22.85-44.99)                                                                                                                                                       | 41.76<br>(27.84-54.11) | 54.66<br>(37.36-69.01) | 83.33<br>(74.00-90.16)                                                                                                              | 91.68<br>(88.02-94.31) | 95.12<br>(91.71-97.31) |
| Armenia        | 23.76<br>(9.53-40.15)                                                                                                                                               | 22.70<br>(9.26-36.30)  | 25.58<br>(9.80-38.89)  | 65.51<br>(50.27-78.95)                                                                                                                                                 | 70.97<br>(65.66-75.73) | 80.13<br>(67.99-88.39) | 37.40<br>(27.47-46.16)                                                                                                                                                       | 42.62<br>(30.63-52.76) | 63.48<br>(49.47-73.90) | 61.33<br>(42.96-80.71)                                                                                                              | 81.58<br>(71.06-89.33) | 97.96<br>(94.79-99.42) |
| Azerbaijan     | 48.63<br>(32.69-63.25)                                                                                                                                              | 51.76<br>(40.96-61.34) | 64.04<br>(49.24-75.43) | 46.10<br>(28.33-63.46)                                                                                                                                                 | 43.08<br>(35.20-50.33) | 72.62<br>(59.69-83.23) | 41.83<br>(32.38-49.99)                                                                                                                                                       | 45.78<br>(33.80-55.78) | 67.33<br>(54.98-76.13) | 66.34<br>(47.89-82.55)                                                                                                              | 80.42<br>(69.63-89.24) | 93.25<br>(82.83-98.19) |

**Appendix Table 1a. Scaled values for each SDG health-related indicator and three summary indicators by country for 1990, 2000, and 2015**

| Location     | Indicator 6.1.1: Risk-weighted prevalence of populations using unsafe or unimproved water sources, as measured by the summary exposure value (SEV) for unsafe water |                        |                        | Indicator 6.2.2a: Risk-weighted prevalence of populations using unsafe or unimproved sanitation, as measured by the summary exposure value (SEV) for unsafe sanitation |                        |                        | Indicator 6.2.1b: Risk-weighted prevalence of populations with unsafe hygiene (no handwashing with soap), as measured by the summary exposure value (SEV) for unsafe hygiene |                        |                        | Indicator 7.1.2: Prevalence of household air pollution, as measured by the summary exposure value (SEV) for household air pollution |                        |                        |
|--------------|---------------------------------------------------------------------------------------------------------------------------------------------------------------------|------------------------|------------------------|------------------------------------------------------------------------------------------------------------------------------------------------------------------------|------------------------|------------------------|------------------------------------------------------------------------------------------------------------------------------------------------------------------------------|------------------------|------------------------|-------------------------------------------------------------------------------------------------------------------------------------|------------------------|------------------------|
|              | 1990                                                                                                                                                                | 2000                   | 2015                   | 1990                                                                                                                                                                   | 2000                   | 2015                   | 1990                                                                                                                                                                         | 2000                   | 2015                   | 1990                                                                                                                                | 2000                   | 2015                   |
| Georgia      | 22.06<br>(5.33-37.46)                                                                                                                                               | 17.19<br>(3.14-28.83)  | 23.20<br>(7.39-37.65)  | 63.28<br>(45.76-78.80)                                                                                                                                                 | 55.35<br>(43.92-65.82) | 70.26<br>(55.12-82.63) | 50.24<br>(39.42-59.08)                                                                                                                                                       | 51.87<br>(37.50-63.45) | 69.92<br>(54.14-81.17) | 61.18<br>(41.21-81.95)                                                                                                              | 66.50<br>(51.56-80.82) | 80.19<br>(61.16-92.86) |
| Kazakhstan   | 54.15<br>(37.40-68.59)                                                                                                                                              | 60.46<br>(46.67-72.90) | 60.61<br>(46.11-72.14) | 53.80<br>(41.42-65.17)                                                                                                                                                 | 57.00<br>(48.14-64.13) | 70.12<br>(59.17-79.55) | 47.78<br>(37.99-55.72)                                                                                                                                                       | 54.60<br>(42.40-63.80) | 73.42<br>(61.49-81.54) | 71.71<br>(49.90-88.26)                                                                                                              | 80.48<br>(68.18-89.92) | 92.07<br>(83.51-97.30) |
| Kyrgyzstan   | 31.61<br>(17.55-47.39)                                                                                                                                              | 31.74<br>(20.41-42.34) | 41.14<br>(29.22-52.63) | 39.87<br>(28.49-51.95)                                                                                                                                                 | 45.72<br>(38.26-52.20) | 37.82<br>(27.99-46.83) | 46.45<br>(35.05-55.96)                                                                                                                                                       | 48.44<br>(34.53-60.05) | 59.99<br>(43.43-73.26) | 60.78<br>(40.62-81.82)                                                                                                              | 67.34<br>(49.57-84.06) | 81.34<br>(70.97-90.08) |
| Mongolia     | 19.35<br>(7.50-31.92)                                                                                                                                               | 23.22<br>(11.84-34.50) | 31.21<br>(17.18-45.11) | 16.05<br>(9.76-23.90)                                                                                                                                                  | 31.47<br>(24.65-38.59) | 43.05<br>(31.69-54.06) | 30.95<br>(22.48-39.03)                                                                                                                                                       | 38.29<br>(27.95-47.31) | 57.79<br>(45.77-66.92) | 44.34<br>(29.48-61.50)                                                                                                              | 46.72<br>(34.19-59.86) | 68.49<br>(53.74-81.85) |
| Tajikistan   | 50.74<br>(34.46-66.71)                                                                                                                                              | 51.24<br>(40.19-61.61) | 62.93<br>(52.28-71.78) | 38.19<br>(26.12-51.83)                                                                                                                                                 | 34.88<br>(26.01-43.27) | 38.33<br>(28.30-47.97) | 33.76<br>(24.66-41.98)                                                                                                                                                       | 33.31<br>(22.68-43.11) | 46.30<br>(32.96-57.26) | 48.70<br>(33.97-67.64)                                                                                                              | 53.89<br>(41.11-65.66) | 76.19<br>(60.20-87.81) |
| Turkmenistan | 37.75<br>(22.00-56.28)                                                                                                                                              | 40.67<br>(22.90-58.90) | 48.27<br>(27.81-67.36) | 53.02<br>(36.18-70.30)                                                                                                                                                 | 63.41<br>(46.88-79.03) | 81.02<br>(66.46-91.02) | 44.79<br>(34.63-53.20)                                                                                                                                                       | 51.30<br>(38.55-61.45) | 71.11<br>(57.36-80.57) | 98.15<br>(94.82-99.53)                                                                                                              | 99.26<br>(98.22-99.80) | 99.68<br>(99.10-99.93) |
| Uzbekistan   | 73.27<br>(62.64-82.32)                                                                                                                                              | 75.56<br>(67.65-82.38) | 81.30<br>(71.55-88.84) | 37.23<br>(26.38-48.43)                                                                                                                                                 | 36.89<br>(27.75-44.62) | 53.88<br>(38.98-68.06) | 37.75<br>(27.47-46.53)                                                                                                                                                       | 43.24<br>(31.26-53.28) | 59.18<br>(45.47-69.66) | 75.12<br>(54.96-90.96)                                                                                                              | 84.56<br>(72.86-92.68) | 89.43<br>(76.20-96.67) |
| Colombia     | 36.67<br>(22.54-49.89)                                                                                                                                              | 37.48<br>(22.47-51.64) | 41.20<br>(25.95-56.00) | 68.41<br>(62.76-72.77)                                                                                                                                                 | 79.02<br>(76.36-81.76) | 92.09<br>(88.52-94.90) | 31.08<br>(24.10-38.24)                                                                                                                                                       | 39.95<br>(32.48-47.15) | 56.82<br>(48.48-63.53) | 76.70<br>(68.52-83.49)                                                                                                              | 84.21<br>(78.82-88.88) | 90.58<br>(83.10-95.58) |
| Costa Rica   | 27.44<br>(14.24-40.17)                                                                                                                                              | 28.72<br>(15.58-40.70) | 31.72<br>(18.33-43.40) | 73.59<br>(64.95-80.95)                                                                                                                                                 | 93.48<br>(90.34-95.60) | 96.35<br>(94.71-97.48) | 34.88<br>(27.56-42.02)                                                                                                                                                       | 42.12<br>(34.53-49.16) | 57.73<br>(49.72-64.26) | 77.19<br>(63.89-87.17)                                                                                                              | 89.59<br>(87.40-91.71) | 97.41<br>(94.78-98.86) |
| El Salvador  | 23.87<br>(12.09-35.55)                                                                                                                                              | 31.24<br>(17.75-43.80) | 36.79<br>(21.39-51.38) | 44.13<br>(35.48-52.27)                                                                                                                                                 | 54.19<br>(45.44-62.19) | 69.99<br>(58.83-79.57) | 23.07<br>(16.56-30.08)                                                                                                                                                       | 30.08<br>(23.17-37.37) | 44.14<br>(35.80-51.42) | 50.71<br>(32.72-68.12)                                                                                                              | 68.35<br>(54.96-78.94) | 88.53<br>(78.19-94.95) |
| Guatemala    | 21.40<br>(10.00-31.98)                                                                                                                                              | 24.76<br>(11.99-37.01) | 29.99<br>(16.46-44.42) | 38.55<br>(29.32-47.45)                                                                                                                                                 | 53.13<br>(46.55-58.81) | 67.36<br>(57.12-76.90) | 17.52<br>(11.96-24.16)                                                                                                                                                       | 21.63<br>(15.44-28.64) | 31.13<br>(23.80-38.24) | 41.76<br>(25.69-57.44)                                                                                                              | 50.52<br>(36.69-62.52) | 68.70<br>(51.93-83.17) |

**Appendix Table 1a. Scaled values for each SDG health-related indicator and three summary indicators by country for 1990, 2000, and 2015**

| Location            | Indicator 6.1.1: Risk-weighted prevalence of populations using unsafe or unimproved water sources, as measured by the summary exposure value (SEV) for unsafe water |                        |                        | Indicator 6.2.2a: Risk-weighted prevalence of populations using unsafe or unimproved sanitation, as measured by the summary exposure value (SEV) for unsafe sanitation |                        |                        | Indicator 6.2.1b: Risk-weighted prevalence of populations with unsafe hygiene (no handwashing with soap), as measured by the summary exposure value (SEV) for unsafe hygiene |                        |                        | Indicator 7.1.2: Prevalence of household air pollution, as measured by the summary exposure value (SEV) for household air pollution |                        |                        |
|---------------------|---------------------------------------------------------------------------------------------------------------------------------------------------------------------|------------------------|------------------------|------------------------------------------------------------------------------------------------------------------------------------------------------------------------|------------------------|------------------------|------------------------------------------------------------------------------------------------------------------------------------------------------------------------------|------------------------|------------------------|-------------------------------------------------------------------------------------------------------------------------------------|------------------------|------------------------|
|                     | 1990                                                                                                                                                                | 2000                   | 2015                   | 1990                                                                                                                                                                   | 2000                   | 2015                   | 1990                                                                                                                                                                         | 2000                   | 2015                   | 1990                                                                                                                                | 2000                   | 2015                   |
| Honduras            | 26.04<br>(15.74-36.48)                                                                                                                                              | 33.23<br>(22.70-42.57) | 39.68<br>(27.18-49.70) | 37.49<br>(26.75-48.09)                                                                                                                                                 | 47.02<br>(38.91-55.06) | 69.29<br>(60.88-76.48) | 21.40<br>(15.21-28.26)                                                                                                                                                       | 27.26<br>(20.29-34.39) | 40.23<br>(32.06-47.67) | 40.60<br>(24.61-55.78)                                                                                                              | 49.96<br>(35.58-63.35) | 69.03<br>(54.19-81.69) |
| Mexico              | 38.68<br>(29.98-46.29)                                                                                                                                              | 41.69<br>(31.98-49.30) | 44.30<br>(34.60-51.95) | 73.42<br>(71.78-74.91)                                                                                                                                                 | 83.85<br>(82.87-84.82) | 89.96<br>(89.11-90.74) | 33.38<br>(26.66-40.31)                                                                                                                                                       | 42.45<br>(35.30-49.30) | 58.94<br>(51.36-65.16) | 81.81<br>(77.54-85.63)                                                                                                              | 84.76<br>(81.25-87.87) | 91.74<br>(89.40-93.71) |
| Nicaragua           | 25.53<br>(13.44-37.80)                                                                                                                                              | 26.89<br>(15.39-38.35) | 31.46<br>(17.54-44.42) | 29.24<br>(21.50-36.37)                                                                                                                                                 | 37.06<br>(30.17-43.01) | 52.51<br>(40.62-63.56) | 23.22<br>(16.75-30.24)                                                                                                                                                       | 28.51<br>(21.18-35.73) | 41.41<br>(32.68-48.89) | 40.11<br>(25.69-54.47)                                                                                                              | 48.22<br>(34.64-60.37) | 68.37<br>(50.94-82.82) |
| Panama              | 38.82<br>(24.36-52.71)                                                                                                                                              | 41.91<br>(25.92-57.62) | 45.41<br>(29.31-61.60) | 53.46<br>(46.11-60.22)                                                                                                                                                 | 60.34<br>(53.85-66.31) | 76.94<br>(67.88-84.64) | 42.16<br>(34.19-49.31)                                                                                                                                                       | 50.57<br>(42.33-57.70) | 67.25<br>(58.90-73.38) | 75.18<br>(67.73-82.34)                                                                                                              | 83.36<br>(77.69-87.96) | 92.36<br>(85.46-96.82) |
| Venezuela           | 39.59<br>(23.99-53.83)                                                                                                                                              | 41.31<br>(25.77-56.43) | 43.72<br>(27.14-58.97) | 80.59<br>(75.81-84.64)                                                                                                                                                 | 86.45<br>(83.09-89.57) | 92.24<br>(88.67-95.00) | 37.23<br>(30.13-44.26)                                                                                                                                                       | 46.34<br>(38.90-53.34) | 63.37<br>(55.38-69.53) | 97.78<br>(95.43-99.09)                                                                                                              | 99.76<br>(99.64-99.86) | 99.90<br>(99.78-99.96) |
| Bolivia             | 43.81<br>(36.34-50.46)                                                                                                                                              | 49.29<br>(44.06-54.06) | 63.38<br>(57.28-68.52) | 26.52<br>(22.70-30.28)                                                                                                                                                 | 38.72<br>(34.86-42.54) | 63.09<br>(52.58-72.66) | 15.94<br>(9.69-22.67)                                                                                                                                                        | 21.43<br>(13.53-29.66) | 32.62<br>(21.68-42.99) | 58.84<br>(48.10-69.44)                                                                                                              | 69.94<br>(62.57-76.78) | 85.05<br>(75.73-91.73) |
| Ecuador             | 53.11<br>(47.40-58.51)                                                                                                                                              | 55.74<br>(50.56-60.30) | 66.56<br>(60.65-71.66) | 50.69<br>(45.08-56.28)                                                                                                                                                 | 72.11<br>(67.69-75.76) | 85.78<br>(80.32-90.43) | 23.33<br>(15.21-31.46)                                                                                                                                                       | 29.22<br>(19.42-38.45) | 41.91<br>(29.09-52.92) | 76.45<br>(69.56-82.35)                                                                                                              | 90.00<br>(86.29-92.81) | 97.36<br>(95.28-98.74) |
| Peru                | 63.11<br>(58.03-67.58)                                                                                                                                              | 66.64<br>(61.81-70.64) | 70.92<br>(65.17-75.93) | 37.65<br>(30.02-44.71)                                                                                                                                                 | 55.68<br>(51.78-59.34) | 74.19<br>(66.66-80.57) | 22.74<br>(14.71-30.90)                                                                                                                                                       | 28.52<br>(18.77-37.76) | 42.56<br>(29.82-53.39) | 51.42<br>(37.48-65.08)                                                                                                              | 66.88<br>(59.02-73.93) | 78.88<br>(71.69-84.99) |
| Antigua and Barbuda | 39.70<br>(28.30-50.34)                                                                                                                                              | 43.24<br>(31.07-53.67) | 46.37<br>(35.40-56.25) | 73.72<br>(60.96-83.59)                                                                                                                                                 | 80.43<br>(69.69-88.30) | 86.27<br>(77.15-92.20) | 36.62<br>(23.50-48.43)                                                                                                                                                       | 45.17<br>(29.80-58.29) | 55.09<br>(36.64-70.91) | 95.26<br>(89.79-98.45)                                                                                                              | 97.36<br>(94.52-98.87) | 98.27<br>(95.86-99.41) |
| The Bahamas         | 42.63<br>(31.75-52.06)                                                                                                                                              | 46.33<br>(35.37-55.44) | 48.72<br>(37.67-58.39) | 80.47<br>(71.56-87.27)                                                                                                                                                 | 87.86<br>(81.29-92.31) | 91.80<br>(87.56-94.98) | 34.52<br>(23.33-45.03)                                                                                                                                                       | 42.37<br>(28.68-53.92) | 52.65<br>(36.02-67.06) | 96.49<br>(91.79-98.92)                                                                                                              | 98.05<br>(95.17-99.41) | 99.25<br>(98.27-99.76) |
| Barbados            | 44.33<br>(32.95-54.26)                                                                                                                                              | 46.67<br>(35.33-56.88) | 48.36<br>(36.40-58.24) | 73.37<br>(61.00-84.79)                                                                                                                                                 | 79.95<br>(68.88-88.45) | 85.78<br>(76.51-92.01) | 29.37<br>(19.02-39.41)                                                                                                                                                       | 37.02<br>(24.66-48.53) | 48.22<br>(32.25-62.28) | 99.22<br>(98.08-99.76)                                                                                                              | 99.64<br>(99.14-99.88) | 99.91<br>(99.79-99.97) |

**Appendix Table 1a. Scaled values for each SDG health-related indicator and three summary indicators by country for 1990, 2000, and 2015**

| Location                         | Indicator 6.1.1: Risk-weighted prevalence of populations using unsafe or unimproved water sources, as measured by the summary exposure value (SEV) for unsafe water |                        |                        | Indicator 6.2.2a: Risk-weighted prevalence of populations using unsafe or unimproved sanitation, as measured by the summary exposure value (SEV) for unsafe sanitation |                        |                        | Indicator 6.2.1b: Risk-weighted prevalence of populations with unsafe hygiene (no handwashing with soap), as measured by the summary exposure value (SEV) for unsafe hygiene |                        |                        | Indicator 7.1.2: Prevalence of household air pollution, as measured by the summary exposure value (SEV) for household air pollution |                        |                        |
|----------------------------------|---------------------------------------------------------------------------------------------------------------------------------------------------------------------|------------------------|------------------------|------------------------------------------------------------------------------------------------------------------------------------------------------------------------|------------------------|------------------------|------------------------------------------------------------------------------------------------------------------------------------------------------------------------------|------------------------|------------------------|-------------------------------------------------------------------------------------------------------------------------------------|------------------------|------------------------|
|                                  | 1990                                                                                                                                                                | 2000                   | 2015                   | 1990                                                                                                                                                                   | 2000                   | 2015                   | 1990                                                                                                                                                                         | 2000                   | 2015                   | 1990                                                                                                                                | 2000                   | 2015                   |
| Belize                           | 12.87<br>(0.23-22.72)                                                                                                                                               | 14.89<br>(1.54-24.97)  | 16.01<br>(2.21-26.75)  | 44.40<br>(34.17-55.44)                                                                                                                                                 | 60.91<br>(49.74-70.70) | 76.82<br>(67.86-84.29) | 14.15<br>(8.03-21.05)                                                                                                                                                        | 19.49<br>(11.69-27.76) | 28.78<br>(17.81-39.81) | 73.18<br>(61.19-84.06)                                                                                                              | 84.39<br>(76.19-91.07) | 89.07<br>(79.96-94.72) |
| Cuba                             | 32.08<br>(21.17-41.35)                                                                                                                                              | 32.05<br>(22.87-40.89) | 39.48<br>(28.95-48.05) | 68.90<br>(55.10-80.56)                                                                                                                                                 | 69.81<br>(59.16-79.01) | 81.81<br>(72.50-88.95) | 26.49<br>(16.51-36.60)                                                                                                                                                       | 29.67<br>(18.00-41.15) | 42.41<br>(27.33-56.43) | 89.06<br>(77.10-95.87)                                                                                                              | 83.52<br>(73.29-91.27) | 97.81<br>(95.39-99.23) |
| Dominica                         | 28.65<br>(16.27-38.79)                                                                                                                                              | 34.85<br>(22.56-45.98) | 39.58<br>(27.32-49.67) | 49.30<br>(35.56-62.04)                                                                                                                                                 | 63.52<br>(49.96-74.95) | 75.78<br>(65.26-84.23) | 23.65<br>(14.37-33.44)                                                                                                                                                       | 31.01<br>(19.27-42.38) | 42.65<br>(27.15-57.01) | 69.19<br>(49.29-85.49)                                                                                                              | 86.00<br>(77.17-92.39) | 95.26<br>(89.25-98.57) |
| Dominican Republic               | 23.86<br>(12.07-33.25)                                                                                                                                              | 20.94<br>(9.46-30.17)  | 30.91<br>(18.87-40.62) | 49.47<br>(43.00-55.72)                                                                                                                                                 | 58.98<br>(53.81-63.54) | 73.79<br>(62.89-82.80) | 16.62<br>(9.72-24.14)                                                                                                                                                        | 22.39<br>(13.51-31.46) | 34.74<br>(22.35-46.57) | 70.04<br>(56.52-81.11)                                                                                                              | 88.61<br>(84.28-92.34) | 93.88<br>(89.33-97.05) |
| Grenada                          | 28.61<br>(17.08-38.62)                                                                                                                                              | 36.80<br>(24.16-47.22) | 42.63<br>(31.30-52.51) | 49.58<br>(37.10-63.07)                                                                                                                                                 | 65.82<br>(52.75-77.24) | 78.45<br>(66.39-87.37) | 23.98<br>(14.42-34.31)                                                                                                                                                       | 32.22<br>(20.10-44.30) | 44.14<br>(28.20-58.84) | 77.69<br>(60.69-90.08)                                                                                                              | 93.36<br>(88.10-96.67) | 97.62<br>(94.52-99.17) |
| Guyana                           | 21.39<br>(11.72-30.59)                                                                                                                                              | 26.88<br>(16.28-35.69) | 33.30<br>(22.22-42.48) | 42.18<br>(33.00-51.29)                                                                                                                                                 | 53.01<br>(42.98-62.45) | 68.77<br>(57.98-78.36) | 16.08<br>(9.03-24.03)                                                                                                                                                        | 20.35<br>(12.00-29.59) | 29.41<br>(17.71-41.34) | 83.37<br>(69.08-93.24)                                                                                                              | 88.83<br>(83.41-93.20) | 94.23<br>(87.77-97.87) |
| Haiti                            | 5.31<br>(0.00-11.96)                                                                                                                                                | 6.91<br>(0.00-13.82)   | 8.88<br>(0.17-16.81)   | 11.48<br>(7.02-17.35)                                                                                                                                                  | 14.19<br>(9.56-19.42)  | 21.48<br>(14.73-28.89) | 6.69<br>(3.43-10.80)                                                                                                                                                         | 7.87<br>(4.11-12.78)   | 11.13<br>(5.92-17.44)  | 26.92<br>(12.39-41.30)                                                                                                              | 27.48<br>(12.95-41.33) | 33.03<br>(18.47-47.89) |
| Jamaica                          | 31.27<br>(20.90-40.08)                                                                                                                                              | 36.68<br>(26.52-45.20) | 42.35<br>(31.92-51.40) | 50.54<br>(43.66-56.92)                                                                                                                                                 | 65.72<br>(60.83-70.46) | 77.89<br>(67.64-86.17) | 22.45<br>(13.57-31.72)                                                                                                                                                       | 29.04<br>(18.16-40.30) | 38.33<br>(23.63-52.58) | 63.99<br>(50.38-75.88)                                                                                                              | 84.47<br>(76.46-90.56) | 92.48<br>(86.62-96.49) |
| Saint Lucia                      | 29.67<br>(18.24-39.20)                                                                                                                                              | 37.77<br>(26.00-48.13) | 42.75<br>(30.96-53.00) | 28.63<br>(20.37-38.37)                                                                                                                                                 | 52.03<br>(40.27-63.54) | 71.16<br>(61.18-80.47) | 21.22<br>(12.79-29.90)                                                                                                                                                       | 28.20<br>(17.73-38.67) | 38.82<br>(24.81-51.86) | 71.48<br>(58.92-81.48)                                                                                                              | 87.46<br>(78.67-93.23) | 95.30<br>(91.31-97.75) |
| Saint Vincent and the Grenadines | 29.72<br>(17.22-40.39)                                                                                                                                              | 34.37<br>(22.05-44.75) | 39.77<br>(28.20-50.46) | 54.70<br>(40.05-68.22)                                                                                                                                                 | 64.48<br>(50.68-76.48) | 77.00<br>(64.85-86.36) | 23.88<br>(14.24-33.94)                                                                                                                                                       | 31.49<br>(19.47-43.63) | 42.93<br>(27.08-57.89) | 46.80<br>(31.99-62.44)                                                                                                              | 80.38<br>(64.76-90.91) | 95.93<br>(91.48-98.52) |
| Suriname                         | 24.44<br>(13.65-33.77)                                                                                                                                              | 27.71<br>(16.34-36.61) | 32.52<br>(21.44-42.09) | 61.98<br>(48.86-72.57)                                                                                                                                                 | 72.38<br>(63.59-79.67) | 85.94<br>(80.39-89.96) | 16.53<br>(9.89-23.54)                                                                                                                                                        | 20.74<br>(12.71-29.08) | 32.32<br>(20.73-43.23) | 68.33<br>(48.66-85.48)                                                                                                              | 80.65<br>(64.75-92.08) | 93.88<br>(87.31-97.47) |

**Appendix Table 1a. Scaled values for each SDG health-related indicator and three summary indicators by country for 1990, 2000, and 2015**

| Location            | Indicator 6.1.1: Risk-weighted prevalence of populations using unsafe or unimproved water sources, as measured by the summary exposure value (SEV) for unsafe water |                        |                        | Indicator 6.2.2a: Risk-weighted prevalence of populations using unsafe or unimproved sanitation, as measured by the summary exposure value (SEV) for unsafe sanitation |                        |                        | Indicator 6.2.1b: Risk-weighted prevalence of populations with unsafe hygiene (no handwashing with soap), as measured by the summary exposure value (SEV) for unsafe hygiene |                        |                        | Indicator 7.1.2: Prevalence of household air pollution, as measured by the summary exposure value (SEV) for household air pollution |                           |                           |
|---------------------|---------------------------------------------------------------------------------------------------------------------------------------------------------------------|------------------------|------------------------|------------------------------------------------------------------------------------------------------------------------------------------------------------------------|------------------------|------------------------|------------------------------------------------------------------------------------------------------------------------------------------------------------------------------|------------------------|------------------------|-------------------------------------------------------------------------------------------------------------------------------------|---------------------------|---------------------------|
|                     | 1990                                                                                                                                                                | 2000                   | 2015                   | 1990                                                                                                                                                                   | 2000                   | 2015                   | 1990                                                                                                                                                                         | 2000                   | 2015                   | 1990                                                                                                                                | 2000                      | 2015                      |
| Trinidad and Tobago | 38.18<br>(27.23-48.17)                                                                                                                                              | 40.08<br>(29.09-49.71) | 46.56<br>(35.81-56.40) | 67.82<br>(59.15-75.65)                                                                                                                                                 | 79.04<br>(74.08-83.84) | 89.84<br>(83.98-94.07) | 30.46<br>(19.52-40.84)                                                                                                                                                       | 36.76<br>(23.61-48.66) | 52.74<br>(36.19-66.40) | 96.68<br>(92.31-98.88)                                                                                                              | 98.86<br>(97.52-99.57)    | 99.51<br>(98.89-99.84)    |
| Brazil              | 29.10<br>(20.50-36.39)                                                                                                                                              | 32.98<br>(24.35-40.34) | 40.06<br>(31.24-47.06) | 77.16<br>(76.20-78.15)                                                                                                                                                 | 82.26<br>(80.88-83.66) | 89.30<br>(88.03-90.39) | 18.79<br>(12.30-25.50)                                                                                                                                                       | 24.54<br>(16.66-32.25) | 36.48<br>(26.07-45.81) | 77.43<br>(72.13-82.26)                                                                                                              | 86.29<br>(82.97-89.23)    | 94.41<br>(92.97-95.70)    |
| Paraguay            | 19.99<br>(11.40-27.90)                                                                                                                                              | 26.98<br>(17.79-35.39) | 39.10<br>(27.87-48.21) | 42.46<br>(32.58-52.35)                                                                                                                                                 | 53.18<br>(46.10-59.94) | 69.29<br>(59.84-77.94) | 19.95<br>(12.65-27.47)                                                                                                                                                       | 25.27<br>(16.50-33.92) | 36.34<br>(24.59-47.03) | 47.78<br>(34.21-59.44)                                                                                                              | 55.00<br>(44.22-64.72)    | 75.97<br>(66.56-83.70)    |
| China               | 22.82<br>(16.55-28.41)                                                                                                                                              | 34.91<br>(28.75-40.32) | 50.08<br>(44.67-55.04) | 21.97<br>(20.15-24.04)                                                                                                                                                 | 41.91<br>(39.55-44.18) | 66.01<br>(63.52-68.53) | 14.59<br>(8.55-21.45)                                                                                                                                                        | 21.53<br>(13.45-29.78) | 37.65<br>(26.52-47.73) | 51.45<br>(41.11-61.81)                                                                                                              | 58.82<br>(49.93-67.74)    | 78.71<br>(73.56-83.54)    |
| North Korea         | 50.16<br>(33.82-64.15)                                                                                                                                              | 47.91<br>(32.61-61.74) | 49.56<br>(34.52-62.68) | 60.31<br>(46.95-72.87)                                                                                                                                                 | 56.07<br>(42.43-68.77) | 58.28<br>(43.95-70.61) | 24.67<br>(15.73-33.41)                                                                                                                                                       | 26.37<br>(16.15-36.82) | 33.12<br>(20.05-46.49) | 48.39<br>(36.64-59.52)                                                                                                              | 50.77<br>(38.99-61.99)    | 59.00<br>(46.93-70.67)    |
| Taiwan              | 60.88<br>(43.52-75.31)                                                                                                                                              | 66.50<br>(48.60-79.75) | 72.39<br>(56.21-84.66) | 84.18<br>(76.13-89.92)                                                                                                                                                 | 90.53<br>(85.08-94.21) | 94.65<br>(91.17-96.97) | 38.14<br>(27.20-47.86)                                                                                                                                                       | 50.16<br>(37.77-60.15) | 66.21<br>(51.52-76.89) | 100.00<br>(100.00-100.00)                                                                                                           | 100.00<br>(100.00-100.00) | 100.00<br>(100.00-100.00) |
| Cambodia            | 10.99<br>(0.61-24.39)                                                                                                                                               | 16.69<br>(6.19-28.76)  | 32.19<br>(20.70-43.25) | 7.12<br>(4.35-10.46)                                                                                                                                                   | 13.81<br>(12.61-15.00) | 49.09<br>(41.32-56.68) | 9.42<br>(5.33-14.35)                                                                                                                                                         | 11.93<br>(7.05-17.47)  | 20.75<br>(13.65-27.76) | 46.09<br>(34.23-57.39)                                                                                                              | 46.57<br>(34.99-57.83)    | 53.18<br>(42.45-63.26)    |
| Indonesia           | 45.11<br>(32.74-56.27)                                                                                                                                              | 51.35<br>(40.04-61.65) | 49.30<br>(37.77-60.07) | 20.87<br>(15.88-26.29)                                                                                                                                                 | 40.95<br>(35.42-46.89) | 72.06<br>(61.82-80.39) | 18.99<br>(12.55-25.81)                                                                                                                                                       | 27.64<br>(19.76-35.31) | 44.39<br>(33.60-53.33) | 55.19<br>(43.19-67.65)                                                                                                              | 69.39<br>(57.51-79.04)    | 82.30<br>(72.50-89.83)    |
| Laos                | 24.25<br>(11.36-37.22)                                                                                                                                              | 31.59<br>(20.69-42.17) | 37.77<br>(26.97-47.22) | 13.37<br>(7.93-20.68)                                                                                                                                                  | 28.18<br>(22.84-33.75) | 66.36<br>(58.28-73.73) | 10.50<br>(6.04-15.69)                                                                                                                                                        | 13.60<br>(8.30-19.46)  | 22.38<br>(15.21-29.69) | 46.97<br>(35.14-58.29)                                                                                                              | 46.78<br>(35.26-57.96)    | 49.02<br>(37.03-59.71)    |
| Malaysia            | 55.92<br>(37.88-70.33)                                                                                                                                              | 64.77<br>(45.00-78.38) | 71.80<br>(55.68-84.75) | 79.99<br>(75.16-84.32)                                                                                                                                                 | 93.32<br>(91.26-94.89) | 97.02<br>(95.32-98.23) | 30.66<br>(22.61-38.44)                                                                                                                                                       | 42.09<br>(32.61-50.14) | 59.92<br>(48.79-68.20) | 94.17<br>(87.04-97.79)                                                                                                              | 98.86<br>(97.72-99.47)    | 99.61<br>(99.10-99.87)    |
| Maldives            | 12.09<br>(0.00-22.54)                                                                                                                                               | 15.55<br>(1.94-26.85)  | 21.14<br>(8.06-32.06)  | 30.87<br>(17.72-45.83)                                                                                                                                                 | 61.92<br>(45.48-75.65) | 79.75<br>(67.23-88.82) | 16.60<br>(10.79-22.96)                                                                                                                                                       | 21.34<br>(14.75-28.35) | 32.32<br>(24.35-39.83) | 64.23<br>(51.18-77.78)                                                                                                              | 76.10<br>(67.55-84.12)    | 95.43<br>(91.09-98.08)    |

**Appendix Table 1a. Scaled values for each SDG health-related indicator and three summary indicators by country for 1990, 2000, and 2015**

| Location                       | Indicator 6.1.1: Risk-weighted prevalence of populations using unsafe or unimproved water sources, as measured by the summary exposure value (SEV) for unsafe water |                        |                        | Indicator 6.2.2a: Risk-weighted prevalence of populations using unsafe or unimproved sanitation, as measured by the summary exposure value (SEV) for unsafe sanitation |                        |                        | Indicator 6.2.1b: Risk-weighted prevalence of populations with unsafe hygiene (no handwashing with soap), as measured by the summary exposure value (SEV) for unsafe hygiene |                        |                        | Indicator 7.1.2: Prevalence of household air pollution, as measured by the summary exposure value (SEV) for household air pollution |                        |                        |
|--------------------------------|---------------------------------------------------------------------------------------------------------------------------------------------------------------------|------------------------|------------------------|------------------------------------------------------------------------------------------------------------------------------------------------------------------------|------------------------|------------------------|------------------------------------------------------------------------------------------------------------------------------------------------------------------------------|------------------------|------------------------|-------------------------------------------------------------------------------------------------------------------------------------|------------------------|------------------------|
|                                | 1990                                                                                                                                                                | 2000                   | 2015                   | 1990                                                                                                                                                                   | 2000                   | 2015                   | 1990                                                                                                                                                                         | 2000                   | 2015                   | 1990                                                                                                                                | 2000                   | 2015                   |
| Mauritius                      | 62.22<br>(44.24-76.83)                                                                                                                                              | 68.98<br>(49.11-83.97) | 74.29<br>(56.58-88.36) | 66.74<br>(54.99-77.22)                                                                                                                                                 | 86.79<br>(80.57-91.58) | 94.06<br>(90.75-96.53) | 25.32<br>(18.02-32.83)                                                                                                                                                       | 34.65<br>(26.11-42.28) | 51.13<br>(40.68-59.57) | 91.18<br>(83.07-96.45)                                                                                                              | 97.55<br>(95.94-98.63) | 98.15<br>(96.02-99.34) |
| Myanmar                        | 15.25<br>(4.95-26.51)                                                                                                                                               | 19.10<br>(8.72-30.07)  | 31.39<br>(19.38-43.95) | 10.56<br>(5.55-16.15)                                                                                                                                                  | 18.37<br>(11.62-25.14) | 42.30<br>(27.92-57.99) | 10.96<br>(6.17-16.44)                                                                                                                                                        | 14.52<br>(8.65-20.88)  | 26.87<br>(18.36-34.83) | 46.39<br>(34.89-57.87)                                                                                                              | 46.73<br>(34.99-58.02) | 52.61<br>(40.55-64.52) |
| Philippines                    | 22.92<br>(12.71-33.75)                                                                                                                                              | 25.15<br>(13.15-35.82) | 32.32<br>(18.82-45.93) | 60.98<br>(54.94-66.78)                                                                                                                                                 | 76.14<br>(72.61-79.61) | 87.69<br>(82.30-91.78) | 31.25<br>(21.98-39.82)                                                                                                                                                       | 36.59<br>(26.17-45.80) | 48.27<br>(36.05-58.37) | 63.93<br>(53.77-72.72)                                                                                                              | 72.87<br>(63.91-80.22) | 70.23<br>(59.03-80.06) |
| Sri Lanka                      | 27.85<br>(16.69-38.47)                                                                                                                                              | 38.30<br>(26.73-49.63) | 51.01<br>(36.73-62.66) | 19.87<br>(12.49-27.11)                                                                                                                                                 | 39.84<br>(29.24-50.85) | 69.04<br>(51.77-83.02) | 27.18<br>(18.60-35.41)                                                                                                                                                       | 35.80<br>(25.81-44.91) | 52.87<br>(40.57-62.50) | 50.68<br>(39.05-61.83)                                                                                                              | 55.69<br>(44.86-65.90) | 61.34<br>(49.33-73.78) |
| Seychelles                     | 57.55<br>(39.46-72.15)                                                                                                                                              | 65.12<br>(48.14-79.34) | 70.74<br>(52.17-83.67) | 72.29<br>(54.92-84.28)                                                                                                                                                 | 83.99<br>(70.28-91.90) | 90.35<br>(81.04-95.34) | 32.55<br>(24.49-40.17)                                                                                                                                                       | 42.55<br>(33.33-50.40) | 58.73<br>(47.69-67.09) | 95.90<br>(91.23-98.62)                                                                                                              | 98.34<br>(96.61-99.31) | 99.30<br>(98.40-99.76) |
| Thailand                       | 21.78<br>(11.32-31.40)                                                                                                                                              | 24.90<br>(13.08-34.63) | 34.10<br>(20.19-47.12) | 80.97<br>(76.84-84.79)                                                                                                                                                 | 96.43<br>(94.79-97.51) | 98.18<br>(96.75-99.04) | 23.93<br>(16.62-31.21)                                                                                                                                                       | 31.60<br>(23.33-39.28) | 45.73<br>(35.85-53.91) | 64.56<br>(54.42-73.86)                                                                                                              | 79.25<br>(72.71-84.87) | 88.03<br>(80.92-93.44) |
| Timor-Leste                    | 42.13<br>(28.04-55.05)                                                                                                                                              | 42.47<br>(29.01-54.54) | 64.87<br>(53.55-74.01) | 6.65<br>(3.07-10.86)                                                                                                                                                   | 5.40<br>(3.06-8.15)    | 39.85<br>(28.41-52.07) | 11.26<br>(6.55-16.75)                                                                                                                                                        | 15.19<br>(9.45-21.64)  | 28.35<br>(20.39-36.06) | 46.42<br>(34.74-57.86)                                                                                                              | 47.22<br>(35.45-58.40) | 50.76<br>(39.53-62.40) |
| Vietnam                        | 43.46<br>(29.67-55.70)                                                                                                                                              | 51.67<br>(39.94-61.81) | 58.33<br>(47.38-67.28) | 11.44<br>(8.69-14.05)                                                                                                                                                  | 28.48<br>(24.37-32.39) | 67.89<br>(58.09-76.53) | 18.64<br>(11.72-25.88)                                                                                                                                                       | 25.16<br>(16.90-33.36) | 39.36<br>(28.50-48.76) | 50.06<br>(38.22-61.62)                                                                                                              | 55.75<br>(45.57-65.31) | 79.18<br>(71.13-85.92) |
| Federated States of Micronesia | 22.74<br>(12.20-32.74)                                                                                                                                              | 28.71<br>(16.76-39.12) | 35.26<br>(23.03-46.11) | 51.57<br>(35.75-65.70)                                                                                                                                                 | 67.19<br>(51.99-78.71) | 82.54<br>(70.91-89.61) | 24.02<br>(14.80-33.47)                                                                                                                                                       | 30.61<br>(19.16-41.94) | 40.51<br>(25.60-54.56) | 67.92<br>(57.05-77.99)                                                                                                              | 72.92<br>(63.86-81.84) | 84.09<br>(74.48-91.62) |
| Fiji                           | 28.95<br>(17.94-39.54)                                                                                                                                              | 34.52<br>(21.30-46.01) | 40.52<br>(27.97-51.12) | 66.25<br>(51.03-77.56)                                                                                                                                                 | 78.40<br>(65.53-87.26) | 89.18<br>(81.44-94.24) | 26.29<br>(17.03-35.20)                                                                                                                                                       | 33.34<br>(22.41-43.57) | 45.29<br>(30.77-57.90) | 66.93<br>(54.90-77.93)                                                                                                              | 77.50<br>(66.52-86.23) | 90.36<br>(83.15-95.38) |
| Kiribati                       | 15.38<br>(6.16-24.16)                                                                                                                                               | 19.12<br>(9.12-28.49)  | 23.58<br>(12.74-33.88) | 33.02<br>(19.67-47.53)                                                                                                                                                 | 44.47<br>(29.22-59.45) | 60.25<br>(43.36-74.26) | 16.31<br>(9.58-23.74)                                                                                                                                                        | 19.51<br>(11.56-27.96) | 26.78<br>(16.13-38.01) | 61.93<br>(49.78-73.70)                                                                                                              | 69.60<br>(56.71-80.97) | 80.07<br>(69.09-89.39) |

**Appendix Table 1a. Scaled values for each SDG health-related indicator and three summary indicators by country for 1990, 2000, and 2015**

| Location         | Indicator 6.1.1: Risk-weighted prevalence of populations using unsafe or unimproved water sources, as measured by the summary exposure value (SEV) for unsafe water |                        |                        | Indicator 6.2.2a: Risk-weighted prevalence of populations using unsafe or unimproved sanitation, as measured by the summary exposure value (SEV) for unsafe sanitation |                        |                        | Indicator 6.2.1b: Risk-weighted prevalence of populations with unsafe hygiene (no handwashing with soap), as measured by the summary exposure value (SEV) for unsafe hygiene |                        |                        | Indicator 7.1.2: Prevalence of household air pollution, as measured by the summary exposure value (SEV) for household air pollution |                        |                         |
|------------------|---------------------------------------------------------------------------------------------------------------------------------------------------------------------|------------------------|------------------------|------------------------------------------------------------------------------------------------------------------------------------------------------------------------|------------------------|------------------------|------------------------------------------------------------------------------------------------------------------------------------------------------------------------------|------------------------|------------------------|-------------------------------------------------------------------------------------------------------------------------------------|------------------------|-------------------------|
|                  | 1990                                                                                                                                                                | 2000                   | 2015                   | 1990                                                                                                                                                                   | 2000                   | 2015                   | 1990                                                                                                                                                                         | 2000                   | 2015                   | 1990                                                                                                                                | 2000                   | 2015                    |
| Marshall Islands | 17.71<br>(8.24-27.17)                                                                                                                                               | 24.16<br>(13.12-34.72) | 32.66<br>(20.13-43.47) | 38.60<br>(24.99-53.18)                                                                                                                                                 | 57.26<br>(41.71-71.00) | 79.01<br>(66.49-87.31) | 17.85<br>(10.82-25.47)                                                                                                                                                       | 23.20<br>(14.47-32.20) | 33.53<br>(21.33-45.28) | 85.54<br>(77.79-91.52)                                                                                                              | 81.79<br>(73.42-88.26) | 89.88<br>(81.94-94.85)  |
| Papua New Guinea | 4.41<br>(0.28-9.47)                                                                                                                                                 | 7.09<br>(2.02-12.20)   | 14.43<br>(6.58-21.96)  | 4.95<br>(2.04-8.94)                                                                                                                                                    | 7.40<br>(3.58-11.94)   | 19.81<br>(11.23-31.39) | 8.68<br>(4.78-13.42)                                                                                                                                                         | 11.05<br>(6.25-16.57)  | 16.35<br>(9.74-23.68)  | 49.38<br>(38.13-60.56)                                                                                                              | 50.88<br>(39.93-61.84) | 55.32<br>(42.97-66.57)  |
| Samoa            | 27.84<br>(15.29-37.82)                                                                                                                                              | 33.13<br>(21.16-43.93) | 40.08<br>(26.41-51.66) | 71.38<br>(54.37-84.57)                                                                                                                                                 | 83.49<br>(69.87-91.69) | 93.70<br>(86.87-97.12) | 29.20<br>(18.54-39.74)                                                                                                                                                       | 35.97<br>(23.07-48.13) | 48.33<br>(31.83-62.86) | 60.42<br>(49.41-69.86)                                                                                                              | 64.74<br>(54.10-74.08) | 71.70<br>(60.09-81.84)  |
| Solomon Islands  | 12.53<br>(4.48-20.70)                                                                                                                                               | 19.42<br>(9.77-28.64)  | 25.53<br>(14.05-36.07) | 11.49<br>(5.61-19.82)                                                                                                                                                  | 24.48<br>(13.66-37.74) | 40.12<br>(26.46-54.90) | 9.91<br>(5.53-15.10)                                                                                                                                                         | 13.93<br>(8.08-20.61)  | 20.66<br>(12.33-29.44) | 48.35<br>(36.64-59.26)                                                                                                              | 50.17<br>(39.19-60.78) | 55.68<br>(44.43-66.79)  |
| Tonga            | 23.97<br>(13.25-33.91)                                                                                                                                              | 29.07<br>(17.11-39.39) | 35.02<br>(23.14-46.21) | 54.38<br>(38.24-68.36)                                                                                                                                                 | 67.48<br>(52.59-79.17) | 82.37<br>(70.93-89.76) | 25.75<br>(16.29-35.28)                                                                                                                                                       | 31.81<br>(20.50-42.64) | 41.61<br>(27.27-54.69) | 59.28<br>(48.23-69.58)                                                                                                              | 65.40<br>(54.44-75.41) | 80.35<br>(68.80-89.63)  |
| Vanuatu          | 10.58<br>(1.14-18.70)                                                                                                                                               | 13.46<br>(2.78-21.90)  | 18.90<br>(7.05-28.40)  | 20.26<br>(10.90-32.42)                                                                                                                                                 | 27.63<br>(17.64-39.10) | 47.54<br>(34.39-60.67) | 13.85<br>(8.14-20.30)                                                                                                                                                        | 17.99<br>(10.86-25.69) | 26.29<br>(16.43-36.34) | 53.08<br>(42.18-63.80)                                                                                                              | 53.30<br>(42.72-64.15) | 61.16<br>(49.24-72.91)  |
| Afghanistan      | 1.40<br>(0.00-7.34)                                                                                                                                                 | 1.80<br>(0.00-6.83)    | 8.88<br>(0.00-16.80)   | 9.79<br>(3.47-19.01)                                                                                                                                                   | 9.71<br>(3.95-17.90)   | 28.43<br>(18.32-39.16) | 3.45<br>(1.59-6.03)                                                                                                                                                          | 3.05<br>(1.38-5.38)    | 4.38<br>(2.09-7.37)    | 35.43<br>(23.86-47.38)                                                                                                              | 35.20<br>(23.61-46.80) | 48.74<br>(34.28-64.86)  |
| Algeria          | 12.85<br>(2.38-23.22)                                                                                                                                               | 18.84<br>(7.15-29.17)  | 22.23<br>(8.95-35.13)  | 53.15<br>(36.73-69.29)                                                                                                                                                 | 77.15<br>(70.28-83.06) | 83.80<br>(74.18-90.64) | 13.33<br>(7.84-19.31)                                                                                                                                                        | 16.34<br>(9.79-23.51)  | 23.03<br>(14.51-31.73) | 93.41<br>(82.25-98.45)                                                                                                              | 97.33<br>(95.04-98.81) | 99.76<br>(99.49-99.90)  |
| Bahrain          | 22.50<br>(8.39-34.64)                                                                                                                                               | 27.18<br>(11.58-40.09) | 32.38<br>(16.73-46.16) | 83.04<br>(72.13-91.23)                                                                                                                                                 | 92.33<br>(87.01-95.99) | 97.08<br>(94.86-98.47) | 21.97<br>(14.70-29.21)                                                                                                                                                       | 29.35<br>(20.18-37.72) | 41.45<br>(29.41-51.67) | 99.36<br>(98.13-99.87)                                                                                                              | 99.58<br>(98.73-99.92) | 99.81<br>(99.41-99.96)  |
| Egypt            | 14.68<br>(1.07-25.74)                                                                                                                                               | 19.01<br>(4.36-30.55)  | 21.35<br>(6.18-33.05)  | 76.48<br>(65.70-85.71)                                                                                                                                                 | 92.87<br>(90.13-95.05) | 96.73<br>(93.79-98.40) | 11.04<br>(6.19-16.61)                                                                                                                                                        | 16.49<br>(9.75-23.76)  | 26.06<br>(16.35-35.66) | 99.98<br>(99.95-100.00)                                                                                                             | 99.25<br>(98.95-99.47) | 99.99<br>(99.96-100.00) |
| Iran             | 16.02<br>(3.75-26.30)                                                                                                                                               | 24.41<br>(10.42-36.82) | 30.03<br>(14.91-43.11) | 42.37<br>(23.32-62.83)                                                                                                                                                 | 72.60<br>(54.05-85.58) | 85.83<br>(74.57-92.98) | 12.93<br>(7.51-18.91)                                                                                                                                                        | 20.46<br>(12.63-28.55) | 32.22<br>(21.15-42.64) | 94.46<br>(84.61-98.67)                                                                                                              | 98.54<br>(96.99-99.38) | 99.52<br>(98.67-99.89)  |

**Appendix Table 1a. Scaled values for each SDG health-related indicator and three summary indicators by country for 1990, 2000, and 2015**

| Location     | Indicator 6.1.1: Risk-weighted prevalence of populations using unsafe or unimproved water sources, as measured by the summary exposure value (SEV) for unsafe water |                        |                        | Indicator 6.2.2a: Risk-weighted prevalence of populations using unsafe or unimproved sanitation, as measured by the summary exposure value (SEV) for unsafe sanitation |                        |                        | Indicator 6.2.1b: Risk-weighted prevalence of populations with unsafe hygiene (no handwashing with soap), as measured by the summary exposure value (SEV) for unsafe hygiene |                        |                        | Indicator 7.1.2: Prevalence of household air pollution, as measured by the summary exposure value (SEV) for household air pollution |                         |                         |
|--------------|---------------------------------------------------------------------------------------------------------------------------------------------------------------------|------------------------|------------------------|------------------------------------------------------------------------------------------------------------------------------------------------------------------------|------------------------|------------------------|------------------------------------------------------------------------------------------------------------------------------------------------------------------------------|------------------------|------------------------|-------------------------------------------------------------------------------------------------------------------------------------|-------------------------|-------------------------|
|              | 1990                                                                                                                                                                | 2000                   | 2015                   | 1990                                                                                                                                                                   | 2000                   | 2015                   | 1990                                                                                                                                                                         | 2000                   | 2015                   | 1990                                                                                                                                | 2000                    | 2015                    |
| Iraq         | 14.06<br>(1.93-24.08)                                                                                                                                               | 17.26<br>(4.34-27.59)  | 23.19<br>(9.24-34.45)  | 73.03<br>(57.89-83.89)                                                                                                                                                 | 86.03<br>(80.06-90.38) | 91.15<br>(87.73-93.93) | 11.05<br>(6.30-16.47)                                                                                                                                                        | 13.95<br>(8.20-20.29)  | 22.10<br>(13.87-30.38) | 96.32<br>(89.70-99.21)                                                                                                              | 97.30<br>(94.50-98.81)  | 99.35<br>(98.58-99.76)  |
| Jordan       | 27.41<br>(13.17-40.69)                                                                                                                                              | 33.51<br>(19.93-45.80) | 44.00<br>(31.16-55.49) | 86.07<br>(75.72-92.69)                                                                                                                                                 | 96.21<br>(93.97-97.68) | 99.53<br>(99.28-99.71) | 22.84<br>(13.96-32.10)                                                                                                                                                       | 28.30<br>(17.02-39.53) | 39.54<br>(24.96-53.40) | 99.71<br>(99.05-99.94)                                                                                                              | 99.92<br>(99.81-99.97)  | 99.98<br>(99.94-99.99)  |
| Kuwait       | 26.71<br>(11.45-39.76)                                                                                                                                              | 30.70<br>(15.49-44.78) | 36.56<br>(20.57-50.58) | 91.12<br>(85.06-95.53)                                                                                                                                                 | 95.66<br>(92.11-97.73) | 98.44<br>(97.22-99.20) | 26.72<br>(18.44-34.63)                                                                                                                                                       | 38.65<br>(28.05-47.72) | 55.15<br>(41.36-65.80) | 99.72<br>(99.07-99.95)                                                                                                              | 99.85<br>(99.53-99.97)  | 99.94<br>(99.79-99.99)  |
| Lebanon      | 7.84<br>(0.00-17.31)                                                                                                                                                | 10.73<br>(2.06-20.04)  | 22.35<br>(10.69-35.02) | 86.89<br>(78.17-92.63)                                                                                                                                                 | 92.48<br>(87.23-95.90) | 97.23<br>(95.14-98.46) | 19.95<br>(12.28-27.76)                                                                                                                                                       | 26.09<br>(16.44-35.83) | 40.09<br>(26.52-52.34) | 99.95<br>(99.85-99.99)                                                                                                              | 99.98<br>(99.93-100.00) | 99.99<br>(99.98-100.00) |
| Libya        | 16.71<br>(4.25-27.88)                                                                                                                                               | 22.08<br>(8.62-33.86)  | 25.97<br>(12.26-39.40) | 65.25<br>(48.03-79.31)                                                                                                                                                 | 83.65<br>(72.72-90.84) | 92.32<br>(86.91-95.91) | 12.55<br>(7.62-18.35)                                                                                                                                                        | 14.88<br>(9.12-21.14)  | 20.33<br>(12.99-27.73) | 96.51<br>(90.08-99.17)                                                                                                              | 97.70<br>(94.54-99.25)  | 98.90<br>(96.70-99.79)  |
| Morocco      | 7.87<br>(0.00-15.69)                                                                                                                                                | 12.09<br>(0.82-21.15)  | 17.65<br>(3.86-28.82)  | 51.56<br>(45.54-57.06)                                                                                                                                                 | 66.91<br>(60.89-72.78) | 78.08<br>(64.96-87.15) | 6.56<br>(3.39-10.49)                                                                                                                                                         | 8.20<br>(4.40-12.77)   | 12.58<br>(7.18-18.40)  | 87.89<br>(68.73-97.27)                                                                                                              | 93.80<br>(88.22-97.28)  | 96.63<br>(90.22-99.29)  |
| Palestine    | 11.69<br>(1.02-22.34)                                                                                                                                               | 18.60<br>(6.68-29.42)  | 20.78<br>(7.95-32.04)  | 72.97<br>(58.25-84.56)                                                                                                                                                 | 86.82<br>(77.96-93.01) | 90.80<br>(83.96-95.11) | 18.40<br>(10.84-26.62)                                                                                                                                                       | 25.50<br>(15.63-35.47) | 27.30<br>(15.77-39.36) | 99.95<br>(99.87-99.99)                                                                                                              | 99.94<br>(99.88-99.98)  | 98.95<br>(98.36-99.38)  |
| Oman         | 1.33<br>(0.00-7.07)                                                                                                                                                 | 12.64<br>(2.18-23.40)  | 22.39<br>(9.43-35.00)  | 57.92<br>(40.66-73.61)                                                                                                                                                 | 87.24<br>(78.85-92.92) | 95.43<br>(92.10-97.58) | 15.93<br>(9.93-22.56)                                                                                                                                                        | 21.50<br>(14.23-28.71) | 31.11<br>(21.67-39.67) | 97.05<br>(91.35-99.37)                                                                                                              | 98.21<br>(94.85-99.66)  | 99.15<br>(97.64-99.83)  |
| Qatar        | 23.27<br>(9.36-36.04)                                                                                                                                               | 26.95<br>(12.93-39.61) | 33.68<br>(17.47-47.42) | 84.97<br>(74.33-91.95)                                                                                                                                                 | 92.17<br>(86.37-95.75) | 97.65<br>(95.96-98.78) | 26.83<br>(19.13-34.45)                                                                                                                                                       | 34.48<br>(25.22-42.63) | 50.52<br>(38.98-59.61) | 99.96<br>(99.87-99.99)                                                                                                              | 99.98<br>(99.93-100.00) | 99.99<br>(99.97-100.00) |
| Saudi Arabia | 17.61<br>(4.52-27.65)                                                                                                                                               | 22.82<br>(9.72-33.13)  | 29.57<br>(16.41-39.87) | 73.03<br>(67.61-77.51)                                                                                                                                                 | 89.08<br>(86.34-91.32) | 96.49<br>(95.56-97.22) | 18.27<br>(11.79-24.97)                                                                                                                                                       | 24.16<br>(16.23-31.89) | 37.04<br>(26.14-46.74) | 98.44<br>(97.26-99.13)                                                                                                              | 99.12<br>(98.37-99.53)  | 99.64<br>(99.36-99.81)  |
| Sudan        | 1.40<br>(0.00-7.51)                                                                                                                                                 | 2.74<br>(0.00-9.60)    | 8.18<br>(0.00-17.59)   | 3.85<br>(1.27-7.80)                                                                                                                                                    | 6.87<br>(2.45-13.56)   | 20.45<br>(9.37-35.32)  | 5.38<br>(2.66-8.92)                                                                                                                                                          | 6.89<br>(3.59-11.19)   | 10.99<br>(6.16-16.84)  | 39.45<br>(26.59-52.89)                                                                                                              | 40.23<br>(29.89-50.53)  | 57.34<br>(48.10-66.04)  |

**Appendix Table 1a. Scaled values for each SDG health-related indicator and three summary indicators by country for 1990, 2000, and 2015**

| Location             | Indicator 6.1.1: Risk-weighted prevalence of populations using unsafe or unimproved water sources, as measured by the summary exposure value (SEV) for unsafe water |                        |                        | Indicator 6.2.2a: Risk-weighted prevalence of populations using unsafe or unimproved sanitation, as measured by the summary exposure value (SEV) for unsafe sanitation |                        |                        | Indicator 6.2.1b: Risk-weighted prevalence of populations with unsafe hygiene (no handwashing with soap), as measured by the summary exposure value (SEV) for unsafe hygiene |                        |                        | Indicator 7.1.2: Prevalence of household air pollution, as measured by the summary exposure value (SEV) for household air pollution |                        |                         |
|----------------------|---------------------------------------------------------------------------------------------------------------------------------------------------------------------|------------------------|------------------------|------------------------------------------------------------------------------------------------------------------------------------------------------------------------|------------------------|------------------------|------------------------------------------------------------------------------------------------------------------------------------------------------------------------------|------------------------|------------------------|-------------------------------------------------------------------------------------------------------------------------------------|------------------------|-------------------------|
|                      | 1990                                                                                                                                                                | 2000                   | 2015                   | 1990                                                                                                                                                                   | 2000                   | 2015                   | 1990                                                                                                                                                                         | 2000                   | 2015                   | 1990                                                                                                                                | 2000                   | 2015                    |
| Syria                | 12.71<br>(0.18-23.03)                                                                                                                                               | 15.99<br>(2.48-26.19)  | 18.53<br>(4.60-29.98)  | 61.93<br>(47.99-74.49)                                                                                                                                                 | 76.69<br>(70.80-81.80) | 88.27<br>(81.87-93.40) | 9.26<br>(4.93-14.31)                                                                                                                                                         | 13.44<br>(7.55-20.13)  | 22.12<br>(13.32-31.52) | 98.14<br>(94.66-99.64)                                                                                                              | 99.41<br>(98.54-99.85) | 99.79<br>(99.41-99.96)  |
| Tunisia              | 12.42<br>(0.00-22.80)                                                                                                                                               | 14.22<br>(0.00-24.77)  | 16.39<br>(2.17-27.51)  | 67.35<br>(53.59-78.62)                                                                                                                                                 | 84.25<br>(77.04-89.61) | 91.66<br>(85.17-95.68) | 8.82<br>(4.77-13.55)                                                                                                                                                         | 14.40<br>(8.46-20.96)  | 26.19<br>(16.40-35.72) | 90.07<br>(73.20-97.72)                                                                                                              | 94.90<br>(90.33-97.70) | 99.71<br>(99.32-99.90)  |
| Turkey               | 15.11<br>(3.09-24.63)                                                                                                                                               | 22.67<br>(7.96-34.39)  | 28.51<br>(12.92-42.07) | 61.64<br>(54.02-68.22)                                                                                                                                                 | 78.44<br>(76.93-79.80) | 86.79<br>(79.86-92.20) | 13.33<br>(7.76-19.20)                                                                                                                                                        | 17.78<br>(10.98-24.93) | 28.12<br>(18.63-37.28) | 86.30<br>(67.86-96.29)                                                                                                              | 92.10<br>(87.29-95.49) | 98.12<br>(94.16-99.64)  |
| United Arab Emirates | 17.41<br>(6.01-28.86)                                                                                                                                               | 26.68<br>(14.04-39.24) | 34.11<br>(19.46-48.50) | 88.89<br>(80.03-94.36)                                                                                                                                                 | 97.04<br>(94.85-98.44) | 98.83<br>(97.87-99.41) | 29.48<br>(21.62-37.13)                                                                                                                                                       | 42.35<br>(31.96-51.13) | 53.86<br>(39.55-65.17) | 99.92<br>(99.74-99.99)                                                                                                              | 99.97<br>(99.93-99.99) | 99.99<br>(99.98-100.00) |
| Yemen                | 3.17<br>(0.00-9.41)                                                                                                                                                 | 3.37<br>(0.00-9.72)    | 11.16<br>(0.97-20.59)  | 11.96<br>(6.10-20.04)                                                                                                                                                  | 19.36<br>(12.27-26.83) | 39.36<br>(26.70-52.93) | 3.98<br>(1.92-6.84)                                                                                                                                                          | 4.93<br>(2.41-8.25)    | 7.38<br>(3.94-11.69)   | 50.10<br>(39.34-60.86)                                                                                                              | 70.24<br>(58.30-79.89) | 77.69<br>(65.91-86.73)  |
| Bangladesh           | 7.15<br>(0.00-16.81)                                                                                                                                                | 8.36<br>(0.00-18.23)   | 13.17<br>(0.00-23.62)  | 8.67<br>(4.66-14.05)                                                                                                                                                   | 16.95<br>(12.72-21.57) | 39.39<br>(26.58-52.60) | 1.73<br>(0.75-3.22)                                                                                                                                                          | 2.49<br>(1.10-4.52)    | 4.74<br>(2.25-8.24)    | 28.90<br>(13.92-42.51)                                                                                                              | 30.02<br>(14.96-42.84) | 36.44<br>(22.06-50.19)  |
| Bhutan               | 45.54<br>(32.05-58.25)                                                                                                                                              | 61.47<br>(50.02-70.62) | 75.23<br>(67.52-81.41) | 14.57<br>(3.96-30.60)                                                                                                                                                  | 31.21<br>(14.29-52.01) | 62.58<br>(48.65-74.36) | 1.85<br>(0.82-3.42)                                                                                                                                                          | 2.68<br>(1.19-4.86)    | 4.70<br>(2.25-8.16)    | 38.52<br>(19.39-60.12)                                                                                                              | 46.32<br>(28.26-63.87) | 71.12<br>(48.99-88.36)  |
| India                | 10.55<br>(2.97-17.58)                                                                                                                                               | 14.57<br>(5.59-22.28)  | 22.22<br>(12.05-30.60) | 17.02<br>(15.44-18.53)                                                                                                                                                 | 25.90<br>(24.37-27.30) | 48.19<br>(44.32-52.20) | 2.34<br>(1.06-4.21)                                                                                                                                                          | 3.72<br>(1.77-6.45)    | 7.91<br>(4.01-13.08)   | 35.41<br>(22.03-47.45)                                                                                                              | 41.07<br>(29.13-52.72) | 53.39<br>(42.89-62.86)  |
| Nepal                | 3.66<br>(0.00-10.40)                                                                                                                                                | 10.40<br>(0.00-18.70)  | 15.36<br>(3.45-24.58)  | 0.57<br>(0.00-2.04)                                                                                                                                                    | 15.93<br>(14.53-17.48) | 54.33<br>(42.71-65.84) | 1.20<br>(0.50-2.29)                                                                                                                                                          | 1.79<br>(0.79-3.31)    | 3.35<br>(1.57-5.85)    | 39.85<br>(26.25-52.00)                                                                                                              | 40.00<br>(27.14-51.86) | 43.96<br>(30.01-55.73)  |
| Pakistan             | 9.64<br>(0.00-18.96)                                                                                                                                                | 11.20<br>(0.00-20.29)  | 15.31<br>(1.02-25.85)  | 22.66<br>(18.68-26.95)                                                                                                                                                 | 44.20<br>(32.45-54.93) | 75.13<br>(66.17-82.73) | 2.07<br>(0.90-3.84)                                                                                                                                                          | 2.81<br>(1.29-5.08)    | 4.51<br>(2.16-7.83)    | 39.12<br>(20.98-59.82)                                                                                                              | 38.28<br>(25.28-50.68) | 52.05<br>(35.04-67.96)  |
| Botswana             | 12.68<br>(0.00-23.21)                                                                                                                                               | 18.09<br>(4.80-29.95)  | 24.05<br>(9.77-36.55)  | 17.31<br>(14.66-19.84)                                                                                                                                                 | 25.13<br>(16.09-35.28) | 43.96<br>(29.94-57.15) | 6.46<br>(3.19-10.85)                                                                                                                                                         | 10.00<br>(5.13-16.00)  | 16.36<br>(8.86-25.04)  | 19.79<br>(9.90-32.48)                                                                                                               | 38.33<br>(21.75-54.32) | 64.41<br>(39.65-84.20)  |

**Appendix Table 1a. Scaled values for each SDG health-related indicator and three summary indicators by country for 1990, 2000, and 2015**

| Location      | Indicator 6.1.1: Risk-weighted prevalence of populations using unsafe or unimproved water sources, as measured by the summary exposure value (SEV) for unsafe water |                        |                        | Indicator 6.2.2a: Risk-weighted prevalence of populations using unsafe or unimproved sanitation, as measured by the summary exposure value (SEV) for unsafe sanitation |                        |                        | Indicator 6.2.1b: Risk-weighted prevalence of populations with unsafe hygiene (no handwashing with soap), as measured by the summary exposure value (SEV) for unsafe hygiene |                       |                        | Indicator 7.1.2: Prevalence of household air pollution, as measured by the summary exposure value (SEV) for household air pollution |                        |                        |
|---------------|---------------------------------------------------------------------------------------------------------------------------------------------------------------------|------------------------|------------------------|------------------------------------------------------------------------------------------------------------------------------------------------------------------------|------------------------|------------------------|------------------------------------------------------------------------------------------------------------------------------------------------------------------------------|-----------------------|------------------------|-------------------------------------------------------------------------------------------------------------------------------------|------------------------|------------------------|
|               | 1990                                                                                                                                                                | 2000                   | 2015                   | 1990                                                                                                                                                                   | 2000                   | 2015                   | 1990                                                                                                                                                                         | 2000                  | 2015                   | 1990                                                                                                                                | 2000                   | 2015                   |
| Lesotho       | 4.17<br>(0.00-11.39)                                                                                                                                                | 6.74<br>(0.00-14.87)   | 12.78<br>(1.01-22.42)  | 3.92<br>(1.71-7.15)                                                                                                                                                    | 5.26<br>(2.84-8.04)    | 15.12<br>(9.75-21.04)  | 4.25<br>(2.04-7.53)                                                                                                                                                          | 5.76<br>(2.78-10.06)  | 9.91<br>(4.88-16.69)   | 25.66<br>(10.87-43.52)                                                                                                              | 27.62<br>(16.98-38.92) | 41.46<br>(24.90-59.44) |
| Namibia       | 9.23<br>(0.00-17.79)                                                                                                                                                | 13.84<br>(2.16-23.41)  | 19.99<br>(7.30-31.33)  | 28.80<br>(22.19-36.15)                                                                                                                                                 | 35.94<br>(31.04-40.97) | 57.05<br>(46.60-67.31) | 7.05<br>(3.48-11.77)                                                                                                                                                         | 9.06<br>(4.57-14.88)  | 14.81<br>(7.80-23.37)  | 15.85<br>(8.52-24.18)                                                                                                               | 27.33<br>(18.31-34.90) | 41.84<br>(27.96-54.99) |
| South Africa  | 19.29<br>(8.12-28.32)                                                                                                                                               | 23.74<br>(12.85-32.56) | 31.24<br>(19.51-40.91) | 52.90<br>(48.06-57.20)                                                                                                                                                 | 56.94<br>(53.66-59.88) | 70.73<br>(66.19-74.78) | 10.69<br>(5.60-17.10)                                                                                                                                                        | 12.99<br>(6.88-20.48) | 19.51<br>(10.45-30.12) | 54.58<br>(46.07-62.50)                                                                                                              | 65.33<br>(59.87-67.79) | 84.77<br>(80.68-88.12) |
| Swaziland     | 3.67<br>(0.00-10.47)                                                                                                                                                | 7.17<br>(0.00-14.83)   | 13.11<br>(0.15-22.84)  | 29.06<br>(19.15-39.51)                                                                                                                                                 | 33.85<br>(27.17-40.60) | 42.35<br>(32.17-52.50) | 6.46<br>(3.19-10.84)                                                                                                                                                         | 9.31<br>(4.76-15.14)  | 14.36<br>(7.58-23.05)  | 13.39<br>(4.61-27.71)                                                                                                               | 21.71<br>(12.43-32.16) | 37.33<br>(17.31-58.62) |
| Zimbabwe      | 12.34<br>(1.49-21.44)                                                                                                                                               | 14.91<br>(3.42-23.94)  | 15.48<br>(4.23-24.89)  | 37.80<br>(32.39-43.51)                                                                                                                                                 | 42.17<br>(36.95-47.50) | 47.30<br>(37.84-55.87) | 5.86<br>(2.87-9.95)                                                                                                                                                          | 8.03<br>(3.95-13.41)  | 10.43<br>(5.09-17.41)  | 15.56<br>(5.27-31.31)                                                                                                               | 26.76<br>(16.43-36.99) | 27.89<br>(15.85-40.28) |
| Benin         | 2.67<br>(0.00-8.87)                                                                                                                                                 | 4.61<br>(0.00-11.92)   | 7.26<br>(0.00-16.39)   | 4.03<br>(2.05-6.81)                                                                                                                                                    | 5.19<br>(3.36-7.33)    | 12.75<br>(7.62-19.70)  | 1.09<br>(0.45-2.08)                                                                                                                                                          | 1.28<br>(0.55-2.44)   | 1.95<br>(0.86-3.59)    | 0.84<br>(0.32-1.61)                                                                                                                 | 2.34<br>(1.08-3.73)    | 6.68<br>(2.80-12.53)   |
| Burkina Faso  | 0.10<br>(0.00-1.41)                                                                                                                                                 | 1.45<br>(0.00-6.97)    | 3.92<br>(0.00-12.25)   | 3.32<br>(1.71-5.19)                                                                                                                                                    | 4.09<br>(2.37-5.92)    | 10.68<br>(6.46-15.68)  | 0.65<br>(0.26-1.29)                                                                                                                                                          | 0.79<br>(0.32-1.54)   | 1.27<br>(0.55-2.42)    | 1.00<br>(0.30-2.19)                                                                                                                 | 1.21<br>(0.46-2.19)    | 5.96<br>(2.56-10.16)   |
| Cameroon      | 1.29<br>(0.00-6.32)                                                                                                                                                 | 2.21<br>(0.00-8.01)    | 6.84<br>(0.00-14.83)   | 7.68<br>(4.70-11.54)                                                                                                                                                   | 10.99<br>(7.59-14.76)  | 24.00<br>(16.16-33.18) | 2.67<br>(1.20-4.82)                                                                                                                                                          | 3.17<br>(1.46-5.67)   | 5.02<br>(2.40-8.73)    | 4.95<br>(1.85-10.19)                                                                                                                | 9.68<br>(4.98-15.49)   | 23.84<br>(11.85-37.68) |
| Cape Verde    | 4.80<br>(0.00-12.93)                                                                                                                                                | 9.20<br>(0.00-18.28)   | 15.35<br>(1.75-26.57)  | 13.14<br>(6.85-21.05)                                                                                                                                                  | 28.58<br>(17.72-40.89) | 56.04<br>(41.91-69.07) | 2.19<br>(0.98-4.01)                                                                                                                                                          | 3.28<br>(1.54-5.83)   | 6.21<br>(3.02-10.55)   | 21.28<br>(8.93-38.62)                                                                                                               | 43.41<br>(29.56-57.53) | 63.99<br>(43.40-81.14) |
| Chad          | 0.01<br>(0.00-0.00)                                                                                                                                                 | 0.03<br>(0.00-0.26)    | 1.64<br>(0.00-7.46)    | 0.54<br>(0.00-1.36)                                                                                                                                                    | 0.34<br>(0.00-0.85)    | 8.48<br>(5.21-12.80)   | 0.83<br>(0.33-1.62)                                                                                                                                                          | 0.92<br>(0.37-1.77)   | 1.63<br>(0.70-3.04)    | 2.15<br>(0.90-3.82)                                                                                                                 | 2.48<br>(1.11-4.09)    | 3.42<br>(1.46-6.38)    |
| Cote d'Ivoire | 2.83<br>(0.00-8.87)                                                                                                                                                 | 6.61<br>(0.00-15.29)   | 7.89<br>(0.00-17.32)   | 10.52<br>(7.02-14.51)                                                                                                                                                  | 24.76<br>(19.16-30.88) | 32.78<br>(23.75-42.35) | 1.77<br>(0.75-3.27)                                                                                                                                                          | 2.04<br>(0.90-3.75)   | 2.70<br>(1.24-4.87)    | 7.31<br>(3.50-11.16)                                                                                                                | 13.56<br>(6.64-21.41)  | 21.01<br>(10.15-34.10) |

**Appendix Table 1a. Scaled values for each SDG health-related indicator and three summary indicators by country for 1990, 2000, and 2015**

| Location              | Indicator 6.1.1: Risk-weighted prevalence of populations using unsafe or unimproved water sources, as measured by the summary exposure value (SEV) for unsafe water |                      |                       | Indicator 6.2.2a: Risk-weighted prevalence of populations using unsafe or unimproved sanitation, as measured by the summary exposure value (SEV) for unsafe sanitation |                        |                        | Indicator 6.2.1b: Risk-weighted prevalence of populations with unsafe hygiene (no handwashing with soap), as measured by the summary exposure value (SEV) for unsafe hygiene |                     |                      | Indicator 7.1.2: Prevalence of household air pollution, as measured by the summary exposure value (SEV) for household air pollution |                        |                        |
|-----------------------|---------------------------------------------------------------------------------------------------------------------------------------------------------------------|----------------------|-----------------------|------------------------------------------------------------------------------------------------------------------------------------------------------------------------|------------------------|------------------------|------------------------------------------------------------------------------------------------------------------------------------------------------------------------------|---------------------|----------------------|-------------------------------------------------------------------------------------------------------------------------------------|------------------------|------------------------|
|                       | 1990                                                                                                                                                                | 2000                 | 2015                  | 1990                                                                                                                                                                   | 2000                   | 2015                   | 1990                                                                                                                                                                         | 2000                | 2015                 | 1990                                                                                                                                | 2000                   | 2015                   |
| The Gambia            | 3.42<br>(0.00-10.87)                                                                                                                                                | 6.02<br>(0.00-14.87) | 7.40<br>(0.00-17.21)  | 10.81<br>(6.05-16.56)                                                                                                                                                  | 28.57<br>(20.72-36.61) | 37.69<br>(25.55-50.72) | 1.29<br>(0.54-2.43)                                                                                                                                                          | 1.51<br>(0.65-2.83) | 2.29<br>(1.04-4.17)  | 2.86<br>(1.33-4.67)                                                                                                                 | 2.96<br>(1.28-4.80)    | 3.63<br>(1.71-6.37)    |
| Ghana                 | 1.59<br>(0.00-6.41)                                                                                                                                                 | 4.44<br>(0.00-11.23) | 7.46<br>(0.00-16.85)  | 5.22<br>(3.50-7.34)                                                                                                                                                    | 13.80<br>(10.57-16.95) | 33.49<br>(24.60-43.34) | 2.61<br>(1.19-4.72)                                                                                                                                                          | 3.33<br>(1.55-5.95) | 5.65<br>(2.71-9.74)  | 3.85<br>(1.69-6.77)                                                                                                                 | 7.77<br>(4.28-9.72)    | 21.43<br>(13.63-27.42) |
| Guinea                | 0.01<br>(0.00-0.00)                                                                                                                                                 | 1.37<br>(0.00-5.66)  | 6.95<br>(0.00-15.10)  | 6.75<br>(3.55-10.67)                                                                                                                                                   | 8.08<br>(5.29-11.12)   | 19.77<br>(13.68-26.12) | 0.98<br>(0.40-1.88)                                                                                                                                                          | 1.05<br>(0.43-2.00) | 1.28<br>(0.54-2.42)  | 1.46<br>(0.61-2.49)                                                                                                                 | 1.39<br>(0.62-2.06)    | 1.68<br>(0.82-2.56)    |
| Guinea-Bissau         | 0.47<br>(0.00-4.21)                                                                                                                                                 | 1.19<br>(0.00-5.87)  | 2.63<br>(0.00-9.40)   | 10.41<br>(5.84-16.32)                                                                                                                                                  | 16.31<br>(10.71-21.99) | 23.55<br>(14.74-33.01) | 0.98<br>(0.40-1.90)                                                                                                                                                          | 1.15<br>(0.49-2.21) | 1.48<br>(0.64-2.80)  | 2.13<br>(0.90-3.83)                                                                                                                 | 1.70<br>(0.72-2.92)    | 2.61<br>(1.11-4.82)    |
| Liberia               | 2.88<br>(0.00-9.78)                                                                                                                                                 | 2.28<br>(0.00-8.35)  | 4.77<br>(0.00-12.65)  | 19.11<br>(12.87-27.26)                                                                                                                                                 | 11.68<br>(7.13-17.36)  | 28.75<br>(21.21-36.61) | 1.07<br>(0.45-2.05)                                                                                                                                                          | 0.93<br>(0.39-1.75) | 1.64<br>(0.74-3.01)  | 1.10<br>(0.48-1.58)                                                                                                                 | 1.21<br>(0.54-1.76)    | 1.98<br>(0.87-3.08)    |
| Mali                  | 0.30<br>(0.00-2.61)                                                                                                                                                 | 1.48<br>(0.00-5.57)  | 4.38<br>(0.00-11.57)  | 3.65<br>(2.16-5.12)                                                                                                                                                    | 8.52<br>(6.09-10.92)   | 13.03<br>(7.71-18.87)  | 0.73<br>(0.29-1.46)                                                                                                                                                          | 0.92<br>(0.38-1.77) | 1.26<br>(0.53-2.38)  | 0.83<br>(0.34-1.31)                                                                                                                 | 1.08<br>(0.47-1.58)    | 1.53<br>(0.70-2.43)    |
| Mauritania            | 1.28<br>(0.00-6.17)                                                                                                                                                 | 3.34<br>(0.00-9.96)  | 4.70<br>(0.00-12.94)  | 6.24<br>(3.05-10.12)                                                                                                                                                   | 8.93<br>(5.54-12.46)   | 28.14<br>(19.00-38.44) | 1.82<br>(0.78-3.34)                                                                                                                                                          | 2.08<br>(0.91-3.83) | 3.27<br>(1.51-5.83)  | 18.45<br>(7.34-34.47)                                                                                                               | 24.60<br>(15.94-31.09) | 40.69<br>(26.58-54.84) |
| Niger                 | 0.13<br>(0.00-2.12)                                                                                                                                                 | 0.12<br>(0.00-1.62)  | 2.00<br>(0.00-8.17)   | 0.12<br>(0.00-0.68)                                                                                                                                                    | 0.37<br>(0.00-1.04)    | 2.71<br>(1.13-4.85)    | 0.71<br>(0.28-1.39)                                                                                                                                                          | 0.68<br>(0.27-1.35) | 0.86<br>(0.36-1.67)  | 1.61<br>(0.69-2.82)                                                                                                                 | 1.78<br>(0.83-2.73)    | 2.16<br>(1.00-3.30)    |
| Nigeria               | 0.58<br>(0.00-4.24)                                                                                                                                                 | 1.01<br>(0.00-5.42)  | 5.34<br>(0.00-13.25)  | 18.02<br>(11.70-25.55)                                                                                                                                                 | 18.92<br>(12.70-25.31) | 34.67<br>(26.22-43.17) | 2.25<br>(1.01-4.07)                                                                                                                                                          | 2.88<br>(1.32-5.18) | 6.14<br>(2.98-10.56) | 7.05<br>(2.69-13.90)                                                                                                                | 15.60<br>(7.94-25.56)  | 27.74<br>(15.99-39.67) |
| Sao Tome and Principe | 6.14<br>(0.00-14.79)                                                                                                                                                | 7.59<br>(0.00-16.14) | 11.26<br>(0.00-21.74) | 12.22<br>(6.84-19.06)                                                                                                                                                  | 18.19<br>(14.02-23.61) | 41.48<br>(31.91-51.38) | 2.18<br>(0.98-4.00)                                                                                                                                                          | 2.66<br>(1.23-4.81) | 4.49<br>(2.14-7.82)  | 5.49<br>(2.15-11.08)                                                                                                                | 11.17<br>(5.29-18.04)  | 34.52<br>(17.92-54.68) |
| Senegal               | 4.36<br>(0.00-10.31)                                                                                                                                                | 8.05<br>(0.00-15.53) | 12.24<br>(0.39-21.53) | 17.24<br>(13.64-21.29)                                                                                                                                                 | 23.72<br>(19.98-27.32) | 37.20<br>(28.27-47.16) | 1.33<br>(0.56-2.53)                                                                                                                                                          | 1.51<br>(0.64-2.82) | 2.14<br>(0.95-3.90)  | 12.70<br>(5.73-21.93)                                                                                                               | 26.08<br>(17.69-32.32) | 21.05<br>(12.81-29.10) |

**Appendix Table 1a. Scaled values for each SDG health-related indicator and three summary indicators by country for 1990, 2000, and 2015**

| Location     | Indicator 6.1.1: Risk-weighted prevalence of populations using unsafe or unimproved water sources, as measured by the summary exposure value (SEV) for unsafe water |                        |                        | Indicator 6.2.2a: Risk-weighted prevalence of populations using unsafe or unimproved sanitation, as measured by the summary exposure value (SEV) for unsafe sanitation |                        |                        | Indicator 6.2.1b: Risk-weighted prevalence of populations with unsafe hygiene (no handwashing with soap), as measured by the summary exposure value (SEV) for unsafe hygiene |                     |                     | Indicator 7.1.2: Prevalence of household air pollution, as measured by the summary exposure value (SEV) for household air pollution |                        |                        |
|--------------|---------------------------------------------------------------------------------------------------------------------------------------------------------------------|------------------------|------------------------|------------------------------------------------------------------------------------------------------------------------------------------------------------------------|------------------------|------------------------|------------------------------------------------------------------------------------------------------------------------------------------------------------------------------|---------------------|---------------------|-------------------------------------------------------------------------------------------------------------------------------------|------------------------|------------------------|
|              | 1990                                                                                                                                                                | 2000                   | 2015                   | 1990                                                                                                                                                                   | 2000                   | 2015                   | 1990                                                                                                                                                                         | 2000                | 2015                | 1990                                                                                                                                | 2000                   | 2015                   |
| Sierra Leone | 0.82<br>(0.00-5.64)                                                                                                                                                 | 0.88<br>(0.00-5.31)    | 2.57<br>(0.00-9.05)    | 11.02<br>(6.33-16.38)                                                                                                                                                  | 9.73<br>(6.89-12.61)   | 16.86<br>(11.44-22.80) | 0.95<br>(0.38-1.81)                                                                                                                                                          | 1.03<br>(0.43-1.97) | 1.77<br>(0.77-3.27) | 3.84<br>(1.67-6.69)                                                                                                                 | 2.00<br>(0.86-3.20)    | 1.57<br>(0.69-2.39)    |
| Togo         | 0.60<br>(0.00-4.31)                                                                                                                                                 | 1.29<br>(0.00-6.10)    | 4.60<br>(0.00-12.78)   | 10.58<br>(6.90-14.49)                                                                                                                                                  | 14.58<br>(10.37-19.19) | 23.74<br>(16.42-31.72) | 1.33<br>(0.56-2.51)                                                                                                                                                          | 1.60<br>(0.69-2.98) | 2.35<br>(1.07-4.24) | 1.37<br>(0.56-2.35)                                                                                                                 | 1.51<br>(0.62-2.72)    | 5.14<br>(2.29-8.52)    |
| Burundi      | 2.52<br>(0.00-9.08)                                                                                                                                                 | 2.76<br>(0.00-9.52)    | 4.16<br>(0.00-12.19)   | 5.43<br>(2.97-8.22)                                                                                                                                                    | 6.46<br>(4.04-9.12)    | 11.12<br>(6.73-16.21)  | 0.88<br>(0.37-1.71)                                                                                                                                                          | 0.95<br>(0.40-1.80) | 1.40<br>(0.61-2.61) | 0.65<br>(0.26-1.14)                                                                                                                 | 0.87<br>(0.39-1.39)    | 1.98<br>(0.82-3.46)    |
| Comoros      | 10.01<br>(0.00-20.21)                                                                                                                                               | 10.86<br>(0.00-20.38)  | 12.83<br>(0.89-23.08)  | 9.08<br>(5.22-13.27)                                                                                                                                                   | 8.66<br>(5.28-12.08)   | 13.40<br>(7.63-20.39)  | 1.47<br>(0.62-2.77)                                                                                                                                                          | 1.73<br>(0.76-3.18) | 2.56<br>(1.15-4.61) | 5.27<br>(1.50-13.97)                                                                                                                | 8.89<br>(4.10-14.61)   | 19.33<br>(6.98-37.15)  |
| Djibouti     | 5.89<br>(0.00-13.89)                                                                                                                                                | 8.73<br>(0.00-17.48)   | 15.17<br>(1.38-25.77)  | 19.49<br>(11.83-29.11)                                                                                                                                                 | 26.33<br>(17.82-35.67) | 41.72<br>(29.49-53.93) | 1.80<br>(0.79-3.34)                                                                                                                                                          | 1.83<br>(0.80-3.38) | 2.72<br>(1.25-4.89) | 75.88<br>(48.93-92.61)                                                                                                              | 82.07<br>(66.04-92.15) | 74.52<br>(45.53-92.62) |
| Eritrea      | 0.98<br>(0.00-5.69)                                                                                                                                                 | 6.00<br>(0.00-12.76)   | 9.34<br>(1.20-17.51)   | 8.68<br>(5.63-13.17)                                                                                                                                                   | 15.97<br>(12.11-20.18) | 22.08<br>(14.05-31.10) | 0.79<br>(0.33-1.52)                                                                                                                                                          | 1.41<br>(0.61-2.65) | 1.73<br>(0.77-3.18) | 8.32<br>(2.18-21.40)                                                                                                                | 22.83<br>(11.53-36.90) | 26.65<br>(5.71-59.39)  |
| Ethiopia     | 0.54<br>(0.00-3.75)                                                                                                                                                 | 0.70<br>(0.00-4.13)    | 8.34<br>(0.06-16.64)   | 1.65<br>(0.49-3.27)                                                                                                                                                    | 1.49<br>(0.59-2.68)    | 6.95<br>(4.20-10.38)   | 0.61<br>(0.24-1.20)                                                                                                                                                          | 0.65<br>(0.26-1.25) | 1.41<br>(0.60-2.64) | 2.64<br>(0.87-6.17)                                                                                                                 | 3.29<br>(1.54-4.90)    | 3.55<br>(1.39-6.92)    |
| Kenya        | 14.09<br>(8.00-19.97)                                                                                                                                               | 19.45<br>(12.39-25.55) | 25.30<br>(17.44-31.85) | 11.86<br>(9.17-14.47)                                                                                                                                                  | 16.51<br>(13.25-19.65) | 23.62<br>(19.84-27.30) | 2.84<br>(1.31-5.07)                                                                                                                                                          | 3.78<br>(1.80-6.68) | 5.66<br>(2.70-9.68) | 7.34<br>(4.65-9.69)                                                                                                                 | 13.10<br>(10.59-14.63) | 17.84<br>(13.86-20.41) |
| Madagascar   | 12.19<br>(4.23-23.01)                                                                                                                                               | 16.20<br>(8.85-24.60)  | 19.28<br>(10.80-27.26) | 1.84<br>(0.58-3.56)                                                                                                                                                    | 2.46<br>(1.39-3.73)    | 3.76<br>(2.02-5.78)    | 1.57<br>(0.68-2.88)                                                                                                                                                          | 1.82<br>(0.81-3.33) | 2.71<br>(1.24-4.87) | 1.62<br>(0.71-2.85)                                                                                                                 | 1.71<br>(0.79-2.69)    | 1.57<br>(0.70-2.75)    |
| Malawi       | 4.82<br>(0.00-11.45)                                                                                                                                                | 7.14<br>(0.00-14.25)   | 11.69<br>(0.66-20.84)  | 3.75<br>(2.62-5.06)                                                                                                                                                    | 3.73<br>(2.71-4.84)    | 6.62<br>(4.05-9.49)    | 0.93<br>(0.39-1.78)                                                                                                                                                          | 1.19<br>(0.52-2.19) | 1.81<br>(0.81-3.33) | 1.42<br>(0.50-3.32)                                                                                                                 | 2.04<br>(0.95-2.79)    | 2.30<br>(1.08-3.43)    |
| Mozambique   | 0.10<br>(0.00-1.48)                                                                                                                                                 | 0.47<br>(0.00-3.37)    | 6.36<br>(0.00-13.63)   | 2.33<br>(0.95-4.10)                                                                                                                                                    | 4.59<br>(2.95-6.38)    | 10.52<br>(6.36-14.83)  | 0.41<br>(0.16-0.82)                                                                                                                                                          | 0.61<br>(0.25-1.20) | 1.48<br>(0.65-2.79) | 0.99<br>(0.06-3.85)                                                                                                                 | 1.69<br>(0.59-3.62)    | 3.97<br>(1.11-9.42)    |

**Appendix Table 1a. Scaled values for each SDG health-related indicator and three summary indicators by country for 1990, 2000, and 2015**

| Location                         | Indicator 6.1.1: Risk-weighted prevalence of populations using unsafe or unimproved water sources, as measured by the summary exposure value (SEV) for unsafe water |                        |                        | Indicator 6.2.2a: Risk-weighted prevalence of populations using unsafe or unimproved sanitation, as measured by the summary exposure value (SEV) for unsafe sanitation |                        |                        | Indicator 6.2.1b: Risk-weighted prevalence of populations with unsafe hygiene (no handwashing with soap), as measured by the summary exposure value (SEV) for unsafe hygiene |                     |                     | Indicator 7.1.2: Prevalence of household air pollution, as measured by the summary exposure value (SEV) for household air pollution |                       |                        |
|----------------------------------|---------------------------------------------------------------------------------------------------------------------------------------------------------------------|------------------------|------------------------|------------------------------------------------------------------------------------------------------------------------------------------------------------------------|------------------------|------------------------|------------------------------------------------------------------------------------------------------------------------------------------------------------------------------|---------------------|---------------------|-------------------------------------------------------------------------------------------------------------------------------------|-----------------------|------------------------|
|                                  | 1990                                                                                                                                                                | 2000                   | 2015                   | 1990                                                                                                                                                                   | 2000                   | 2015                   | 1990                                                                                                                                                                         | 2000                | 2015                | 1990                                                                                                                                | 2000                  | 2015                   |
| Rwanda                           | 14.29<br>(6.04-23.17)                                                                                                                                               | 18.01<br>(8.66-27.05)  | 25.91<br>(15.50-35.47) | 15.09<br>(8.17-21.35)                                                                                                                                                  | 16.30<br>(8.96-23.04)  | 19.30<br>(10.40-27.13) | 1.11<br>(0.47-2.11)                                                                                                                                                          | 1.24<br>(0.53-2.30) | 2.38<br>(1.08-4.34) | 0.85<br>(0.37-1.30)                                                                                                                 | 0.30<br>(0.12-0.48)   | 0.57<br>(0.13-1.37)    |
| Somalia                          | 2.96<br>(0.00-8.86)                                                                                                                                                 | 2.64<br>(0.00-7.49)    | 4.84<br>(0.00-10.67)   | 18.19<br>(10.21-27.70)                                                                                                                                                 | 20.52<br>(13.55-27.87) | 26.25<br>(17.61-36.03) | 0.54<br>(0.21-1.09)                                                                                                                                                          | 0.50<br>(0.20-1.01) | 0.67<br>(0.27-1.31) | 1.29<br>(0.54-2.60)                                                                                                                 | 1.23<br>(0.52-2.15)   | 1.45<br>(0.59-3.22)    |
| South Sudan                      | 1.20<br>(0.00-5.67)                                                                                                                                                 | 2.59<br>(0.00-9.02)    | 5.73<br>(0.00-13.93)   | 3.23<br>(1.25-5.93)                                                                                                                                                    | 4.19<br>(1.77-7.61)    | 8.00<br>(3.83-13.15)   | 1.17<br>(0.47-2.23)                                                                                                                                                          | 1.15<br>(0.47-2.20) | 1.33<br>(0.56-2.49) | 1.03<br>(0.44-1.66)                                                                                                                 | 1.05<br>(0.45-1.62)   | 1.49<br>(0.62-2.68)    |
| Tanzania                         | 13.04<br>(5.46-21.00)                                                                                                                                               | 15.58<br>(8.61-22.99)  | 23.63<br>(15.56-31.65) | 5.51<br>(3.78-7.34)                                                                                                                                                    | 5.48<br>(3.74-7.37)    | 10.84<br>(6.47-15.98)  | 1.75<br>(0.76-3.22)                                                                                                                                                          | 2.13<br>(0.97-3.90) | 3.75<br>(1.74-6.68) | 1.65<br>(0.71-3.14)                                                                                                                 | 4.83<br>(2.47-7.05)   | 5.67<br>(1.94-12.38)   |
| Uganda                           | 12.21<br>(4.02-21.67)                                                                                                                                               | 18.30<br>(10.88-25.95) | 25.66<br>(16.73-34.05) | 13.15<br>(7.27-18.94)                                                                                                                                                  | 14.94<br>(8.41-21.42)  | 20.02<br>(11.99-27.93) | 1.16<br>(0.50-2.18)                                                                                                                                                          | 1.71<br>(0.76-3.17) | 3.16<br>(1.47-5.70) | 1.03<br>(0.46-1.45)                                                                                                                 | 2.11<br>(0.95-3.21)   | 2.38<br>(1.10-3.87)    |
| Zambia                           | 11.20<br>(3.53-19.72)                                                                                                                                               | 12.72<br>(5.22-20.08)  | 23.76<br>(14.00-33.60) | 22.91<br>(17.60-28.67)                                                                                                                                                 | 18.74<br>(15.31-22.32) | 36.40<br>(25.93-47.09) | 2.50<br>(1.13-4.53)                                                                                                                                                          | 2.83<br>(1.31-5.12) | 5.11<br>(2.42-8.84) | 7.47<br>(1.61-20.76)                                                                                                                | 8.41<br>(3.82-13.36)  | 12.72<br>(4.87-24.15)  |
| Angola                           | 1.15<br>(0.00-6.03)                                                                                                                                                 | 2.03<br>(0.00-7.40)    | 4.40<br>(0.00-11.69)   | 15.14<br>(8.30-23.60)                                                                                                                                                  | 21.35<br>(14.36-29.39) | 43.94<br>(33.17-54.96) | 0.30<br>(0.11-0.63)                                                                                                                                                          | 0.40<br>(0.15-0.81) | 1.11<br>(0.47-2.15) | 3.87<br>(1.18-8.42)                                                                                                                 | 10.45<br>(4.84-17.62) | 33.06<br>(16.45-51.57) |
| Central African Republic         | 0.24<br>(0.00-2.72)                                                                                                                                                 | 1.13<br>(0.00-6.08)    | 1.65<br>(0.00-7.30)    | 6.56<br>(3.31-10.64)                                                                                                                                                   | 7.82<br>(4.03-12.09)   | 8.75<br>(4.53-13.88)   | 0.02<br>(0.00-0.10)                                                                                                                                                          | 0.06<br>(0.00-0.19) | 0.15<br>(0.05-0.33) | 1.16<br>(0.49-1.98)                                                                                                                 | 1.11<br>(0.52-1.76)   | 1.51<br>(0.66-2.55)    |
| Congo                            | 4.05<br>(0.00-12.05)                                                                                                                                                | 5.46<br>(0.00-13.88)   | 8.06<br>(0.00-17.07)   | 10.22<br>(5.19-16.76)                                                                                                                                                  | 12.48<br>(7.45-18.69)  | 22.92<br>(14.71-31.96) | 0.78<br>(0.32-1.54)                                                                                                                                                          | 1.05<br>(0.46-2.02) | 1.96<br>(0.85-3.72) | 4.64<br>(1.54-10.33)                                                                                                                | 8.73<br>(3.40-16.18)  | 31.04<br>(15.15-50.14) |
| Democratic Republic of the Congo | 2.10<br>(0.00-8.22)                                                                                                                                                 | 1.06<br>(0.00-5.39)    | 2.76<br>(0.00-9.61)    | 8.73<br>(4.62-14.07)                                                                                                                                                   | 8.37<br>(4.40-12.87)   | 15.26<br>(9.13-22.68)  | 0.11<br>(0.02-0.28)                                                                                                                                                          | 0.08<br>(0.00-0.23) | 0.29<br>(0.11-0.61) | 0.57<br>(0.25-0.80)                                                                                                                 | 0.99<br>(0.42-1.58)   | 3.46<br>(1.53-6.07)    |
| Equatorial Guinea                | 0.06<br>(0.00-0.88)                                                                                                                                                 | 1.84<br>(0.00-7.51)    | 9.27<br>(0.00-19.72)   | 29.50<br>(18.54-42.20)                                                                                                                                                 | 64.01<br>(53.64-73.18) | 86.51<br>(79.74-91.62) | 0.15<br>(0.05-0.34)                                                                                                                                                          | 0.93<br>(0.40-1.81) | 3.61<br>(1.58-6.59) | 3.14<br>(1.32-6.09)                                                                                                                 | 5.37<br>(2.01-10.69)  | 14.26<br>(5.18-30.81)  |

**Appendix Table 1a. Scaled values for each SDG health-related indicator and three summary indicators by country for 1990, 2000, and 2015**

| Location | Indicator 6.1.1: Risk-weighted prevalence of populations using unsafe or unimproved water sources, as measured by the summary exposure value (SEV) for unsafe water |                      |                       | Indicator 6.2.2a: Risk-weighted prevalence of populations using unsafe or unimproved sanitation, as measured by the summary exposure value (SEV) for unsafe sanitation |                        |                        | Indicator 6.2.1b: Risk-weighted prevalence of populations with unsafe hygiene (no handwashing with soap), as measured by the summary exposure value (SEV) for unsafe hygiene |                     |                     | Indicator 7.1.2: Prevalence of household air pollution, as measured by the summary exposure value (SEV) for household air pollution |                        |                        |
|----------|---------------------------------------------------------------------------------------------------------------------------------------------------------------------|----------------------|-----------------------|------------------------------------------------------------------------------------------------------------------------------------------------------------------------|------------------------|------------------------|------------------------------------------------------------------------------------------------------------------------------------------------------------------------------|---------------------|---------------------|-------------------------------------------------------------------------------------------------------------------------------------|------------------------|------------------------|
|          | 1990                                                                                                                                                                | 2000                 | 2015                  | 1990                                                                                                                                                                   | 2000                   | 2015                   | 1990                                                                                                                                                                         | 2000                | 2015                | 1990                                                                                                                                | 2000                   | 2015                   |
| Gabon    | 6.24<br>(0.00-14.64)                                                                                                                                                | 9.60<br>(0.00-19.19) | 14.86<br>(1.34-25.82) | 21.32<br>(12.28-31.62)                                                                                                                                                 | 32.24<br>(22.72-42.08) | 50.11<br>(38.66-60.99) | 2.19<br>(0.95-4.10)                                                                                                                                                          | 2.70<br>(1.17-4.91) | 4.15<br>(1.87-7.59) | 26.04<br>(9.93-47.92)                                                                                                               | 52.84<br>(37.12-67.51) | 84.06<br>(72.06-92.23) |

**Appendix Table 1a. Scaled values for each SDG health-related indicator and three summary indicators by country for 1990, 2000, and 2015**

| Location      | Indicator 8.8.1: Age-standardised all-cause disability-adjusted life year (DALY) rates attributable to occupational risks (per 100,000 population) |                         |                         | Indicator 11.6.2: Population-weighted mean levels of fine particulate matter smaller than 2.5 microns (PM2.5) |                        |                        | Indicator 16.1.1: Age-standardised death rate due to interpersonal violence (per 100,000 population) |                        |                         | Indicator 16.1.2: Age-standardised death rate due to collective violence and legal intervention (per 100,000 population) |                           |                           |
|---------------|----------------------------------------------------------------------------------------------------------------------------------------------------|-------------------------|-------------------------|---------------------------------------------------------------------------------------------------------------|------------------------|------------------------|------------------------------------------------------------------------------------------------------|------------------------|-------------------------|--------------------------------------------------------------------------------------------------------------------------|---------------------------|---------------------------|
|               | 1990                                                                                                                                               | 2000                    | 2015                    | 1990                                                                                                          | 2000                   | 2015                   | 1990                                                                                                 | 2000                   | 2015                    | 1990                                                                                                                     | 2000                      | 2015                      |
| Canada        | 73.25<br>(67.54-78.90)                                                                                                                             | 72.12<br>(66.29-78.29)  | 74.47<br>(69.17-80.04)  | 75.41<br>(68.28-79.93)                                                                                        | 75.86<br>(68.63-80.56) | 77.89<br>(70.45-82.69) | 61.56<br>(58.51-64.42)                                                                               | 70.35<br>(67.21-73.28) | 68.95<br>(64.90-72.49)  | 100.00<br>(100.00-100.00)                                                                                                | 100.00<br>(100.00-100.00) | 100.00<br>(100.00-100.00) |
| United States | 75.75<br>(71.36-80.07)                                                                                                                             | 77.01<br>(72.44-81.58)  | 79.96<br>(76.56-83.76)  | 66.92<br>(60.82-71.16)                                                                                        | 68.41<br>(62.10-72.70) | 74.07<br>(67.27-78.49) | 32.79<br>(31.15-34.80)                                                                               | 38.42<br>(36.52-40.58) | 41.83<br>(39.44-44.12)  | 31.03<br>(21.14-41.77)                                                                                                   | 28.84<br>(19.13-39.99)    | 100.00<br>(100.00-100.00) |
| Australia     | 64.17<br>(58.12-69.80)                                                                                                                             | 68.88<br>(63.44-74.88)  | 75.88<br>(70.94-81.40)  | 79.45<br>(72.05-84.11)                                                                                        | 79.14<br>(71.82-83.86) | 82.46<br>(74.70-87.43) | 61.20<br>(58.61-63.79)                                                                               | 64.83<br>(62.08-67.52) | 72.06<br>(68.72-74.83)  | 100.00<br>(100.00-100.00)                                                                                                | 100.00<br>(100.00-100.00) | 100.00<br>(100.00-100.00) |
| New Zealand   | 68.19<br>(62.92-73.05)                                                                                                                             | 66.26<br>(60.21-72.23)  | 71.23<br>(65.59-76.59)  | 81.07<br>(73.31-86.10)                                                                                        | 81.18<br>(73.13-86.11) | 83.87<br>(75.74-88.95) | 61.81<br>(58.93-64.54)                                                                               | 65.66<br>(62.60-68.40) | 71.08<br>(67.70-74.03)  | 100.00<br>(100.00-100.00)                                                                                                | 33.17<br>(25.08-45.56)    | 100.00<br>(100.00-100.00) |
| Brunei        | 84.48<br>(79.72-89.04)                                                                                                                             | 87.62<br>(83.10-91.70)  | 91.61<br>(86.67-95.91)  | 82.43<br>(74.12-88.25)                                                                                        | 83.28<br>(74.85-89.76) | 85.66<br>(76.77-92.65) | 64.09<br>(60.32-68.12)                                                                               | 67.71<br>(64.61-70.91) | 69.43<br>(65.89-73.32)  | 100.00<br>(100.00-100.00)                                                                                                | 100.00<br>(100.00-100.00) | 100.00<br>(100.00-100.00) |
| Japan         | 94.26<br>(90.51-97.12)                                                                                                                             | 96.89<br>(93.08-99.68)  | 96.23<br>(91.88-99.32)  | 64.17<br>(58.11-68.60)                                                                                        | 64.72<br>(58.79-69.09) | 63.04<br>(57.17-67.53) | 77.00<br>(74.01-79.34)                                                                               | 78.40<br>(75.44-80.95) | 86.74<br>(83.31-89.45)  | 100.00<br>(100.00-100.00)                                                                                                | 71.51<br>(45.94-95.50)    | 100.00<br>(100.00-100.00) |
| Singapore     | 90.07<br>(83.28-94.45)                                                                                                                             | 97.83<br>(90.86-100.00) | 97.52<br>(92.88-100.00) | 55.11<br>(45.17-64.87)                                                                                        | 54.38<br>(44.83-64.16) | 54.96<br>(45.15-64.87) | 64.14<br>(61.30-66.70)                                                                               | 74.84<br>(71.66-77.57) | 97.07<br>(93.12-100.00) | 23.52<br>(15.24-47.03)                                                                                                   | 17.74<br>(11.42-36.17)    | 100.00<br>(100.00-100.00) |
| South Korea   | 70.50<br>(65.80-74.75)                                                                                                                             | 77.95<br>(73.28-81.74)  | 89.67<br>(85.05-93.78)  | 46.69<br>(42.11-52.99)                                                                                        | 46.47<br>(42.03-53.17) | 43.72<br>(39.52-50.22) | 64.46<br>(61.15-67.35)                                                                               | 57.37<br>(54.53-60.13) | 64.48<br>(60.44-68.20)  | 100.00<br>(100.00-100.00)                                                                                                | 100.00<br>(100.00-100.00) | 100.00<br>(100.00-100.00) |
| Andorra       | 74.92<br>(66.11-82.56)                                                                                                                             | 74.55<br>(66.38-83.16)  | 75.80<br>(67.59-83.13)  | 67.24<br>(58.84-75.90)                                                                                        | 68.35<br>(59.80-76.23) | 70.07<br>(61.80-78.05) | 79.23<br>(71.60-90.20)                                                                               | 83.96<br>(75.71-94.58) | 87.45<br>(79.54-94.68)  | 100.00<br>(100.00-100.00)                                                                                                | 100.00<br>(100.00-100.00) | 100.00<br>(100.00-100.00) |
| Austria       | 58.57<br>(52.01-65.18)                                                                                                                             | 58.86<br>(54.26-63.78)  | 67.88<br>(62.68-72.66)  | 53.94<br>(48.90-59.19)                                                                                        | 59.74<br>(54.20-64.82) | 57.01<br>(51.64-62.29) | 68.19<br>(65.31-70.58)                                                                               | 77.12<br>(74.07-79.75) | 83.41<br>(79.84-85.99)  | 100.00<br>(100.00-100.00)                                                                                                | 100.00<br>(100.00-100.00) | 100.00<br>(100.00-100.00) |
| Belgium       | 77.03<br>(69.12-83.99)                                                                                                                             | 78.26<br>(70.19-88.06)  | 82.05<br>(74.07-91.00)  | 53.14<br>(48.18-58.52)                                                                                        | 57.22<br>(52.12-62.42) | 59.11<br>(53.75-64.37) | 63.86<br>(60.94-66.47)                                                                               | 60.26<br>(57.53-62.97) | 68.75<br>(65.43-71.54)  | 23.19<br>(17.53-32.64)                                                                                                   | 100.00<br>(100.00-100.00) | 100.00<br>(100.00-100.00) |

**Appendix Table 1a. Scaled values for each SDG health-related indicator and three summary indicators by country for 1990, 2000, and 2015**

| Location   | Indicator 8.8.1: Age-standardised all-cause disability-adjusted life year (DALY) rates attributable to occupational risks (per 100,000 population) |                        |                        | Indicator 11.6.2: Population-weighted mean levels of fine particulate matter smaller than 2.5 microns (PM2.5) |                        |                        | Indicator 16.1.1: Age-standardised death rate due to interpersonal violence (per 100,000 population) |                        |                        | Indicator 16.1.2: Age-standardised death rate due to collective violence and legal intervention (per 100,000 population) |                           |                           |
|------------|----------------------------------------------------------------------------------------------------------------------------------------------------|------------------------|------------------------|---------------------------------------------------------------------------------------------------------------|------------------------|------------------------|------------------------------------------------------------------------------------------------------|------------------------|------------------------|--------------------------------------------------------------------------------------------------------------------------|---------------------------|---------------------------|
|            | 1990                                                                                                                                               | 2000                   | 2015                   | 1990                                                                                                          | 2000                   | 2015                   | 1990                                                                                                 | 2000                   | 2015                   | 1990                                                                                                                     | 2000                      | 2015                      |
| Cyprus     | 62.30<br>(55.24-69.44)                                                                                                                             | 61.67<br>(55.65-67.62) | 62.90<br>(56.47-69.09) | 59.05<br>(53.54-64.46)                                                                                        | 59.84<br>(53.78-65.13) | 55.22<br>(49.72-60.65) | 58.58<br>(55.26-61.60)                                                                               | 60.06<br>(56.98-62.59) | 67.50<br>(63.67-71.09) | 100.00<br>(100.00-100.00)                                                                                                | 100.00<br>(100.00-100.00) | 100.00<br>(100.00-100.00) |
| Denmark    | 62.85<br>(56.16-69.57)                                                                                                                             | 66.52<br>(60.38-72.77) | 70.93<br>(65.03-77.13) | 63.93<br>(57.93-68.70)                                                                                        | 67.85<br>(61.67-72.49) | 67.68<br>(61.69-72.48) | 68.76<br>(65.88-71.40)                                                                               | 67.09<br>(64.11-69.69) | 77.25<br>(73.20-80.11) | 100.00<br>(100.00-100.00)                                                                                                | 100.00<br>(100.00-100.00) | 100.00<br>(100.00-100.00) |
| Finland    | 71.50<br>(65.84-77.14)                                                                                                                             | 73.79<br>(68.77-78.72) | 77.17<br>(71.18-83.19) | 75.82<br>(68.83-80.40)                                                                                        | 78.17<br>(70.85-82.81) | 77.24<br>(69.93-81.86) | 52.91<br>(50.34-55.36)                                                                               | 55.57<br>(52.83-58.24) | 65.80<br>(62.58-68.59) | 29.39<br>(21.46-44.37)                                                                                                   | 100.00<br>(100.00-100.00) | 100.00<br>(100.00-100.00) |
| France     | 68.20<br>(61.89-74.98)                                                                                                                             | 69.51<br>(63.33-75.97) | 80.84<br>(72.71-88.21) | 61.58<br>(55.92-66.36)                                                                                        | 64.42<br>(58.46-68.98) | 64.89<br>(58.68-69.34) | 63.52<br>(60.68-65.97)                                                                               | 69.32<br>(66.44-71.88) | 76.76<br>(73.27-79.57) | 100.00<br>(100.00-100.00)                                                                                                | 100.00<br>(100.00-100.00) | 22.09<br>(16.72-30.98)    |
| Germany    | 68.70<br>(63.11-74.10)                                                                                                                             | 69.36<br>(63.35-75.24) | 70.71<br>(64.22-77.40) | 56.38<br>(51.08-61.74)                                                                                        | 61.70<br>(56.05-66.29) | 61.82<br>(56.18-66.47) | 72.52<br>(69.55-74.96)                                                                               | 71.22<br>(68.22-73.81) | 80.67<br>(77.34-83.42) | 100.00<br>(100.00-100.00)                                                                                                | 100.00<br>(100.00-100.00) | 100.00<br>(100.00-100.00) |
| Greece     | 63.52<br>(56.07-70.02)                                                                                                                             | 66.34<br>(58.07-72.93) | 72.04<br>(64.08-78.69) | 62.76<br>(56.85-67.61)                                                                                        | 65.63<br>(59.47-70.38) | 62.77<br>(56.94-67.30) | 73.77<br>(70.62-76.41)                                                                               | 74.09<br>(70.79-76.73) | 75.33<br>(71.74-78.37) | 100.00<br>(100.00-100.00)                                                                                                | 100.00<br>(100.00-100.00) | 100.00<br>(100.00-100.00) |
| Iceland    | 61.46<br>(55.79-67.13)                                                                                                                             | 62.17<br>(56.23-68.29) | 68.94<br>(62.79-74.76) | 74.19<br>(67.23-79.31)                                                                                        | 75.31<br>(68.17-80.57) | 76.00<br>(68.60-81.34) | 71.66<br>(68.28-74.36)                                                                               | 75.75<br>(72.33-78.75) | 83.43<br>(79.11-86.66) | 100.00<br>(100.00-100.00)                                                                                                | 100.00<br>(100.00-100.00) | 100.00<br>(100.00-100.00) |
| Ireland    | 68.73<br>(63.16-73.83)                                                                                                                             | 70.60<br>(66.33-74.81) | 64.91<br>(58.01-71.21) | 68.18<br>(61.84-72.64)                                                                                        | 70.38<br>(63.90-74.88) | 70.51<br>(63.69-75.00) | 75.64<br>(72.33-78.79)                                                                               | 75.68<br>(72.34-78.89) | 81.92<br>(78.14-84.93) | 100.00<br>(100.00-100.00)                                                                                                | 100.00<br>(100.00-100.00) | 100.00<br>(100.00-100.00) |
| Israel     | 76.16<br>(69.59-82.10)                                                                                                                             | 79.28<br>(73.05-85.07) | 78.86<br>(72.96-83.96) | 55.70<br>(50.32-61.46)                                                                                        | 56.85<br>(51.64-61.83) | 51.60<br>(46.71-57.53) | 59.88<br>(57.13-62.43)                                                                               | 48.83<br>(46.37-51.33) | 56.65<br>(53.68-59.34) | 7.47<br>(5.79-9.04)                                                                                                      | 8.46<br>(6.67-9.70)       | 19.56<br>(14.91-26.74)    |
| Italy      | 62.54<br>(55.30-69.49)                                                                                                                             | 67.71<br>(62.49-73.00) | 72.18<br>(66.11-78.69) | 54.88<br>(49.75-60.40)                                                                                        | 59.42<br>(53.99-64.22) | 53.12<br>(48.08-58.55) | 59.90<br>(57.11-62.61)                                                                               | 70.36<br>(67.29-73.28) | 77.21<br>(73.74-80.00) | 100.00<br>(100.00-100.00)                                                                                                | 100.00<br>(100.00-100.00) | 100.00<br>(100.00-100.00) |
| Luxembourg | 69.75<br>(62.05-77.42)                                                                                                                             | 70.35<br>(63.42-77.23) | 91.00<br>(82.31-98.82) | 52.54<br>(46.93-58.43)                                                                                        | 57.10<br>(51.54-62.55) | 57.66<br>(51.92-63.24) | 62.33<br>(59.58-64.82)                                                                               | 67.52<br>(64.70-70.38) | 76.83<br>(73.17-79.82) | 100.00<br>(100.00-100.00)                                                                                                | 100.00<br>(100.00-100.00) | 100.00<br>(100.00-100.00) |

**Appendix Table 1a. Scaled values for each SDG health-related indicator and three summary indicators by country for 1990, 2000, and 2015**

| Location       | Indicator 8.8.1: Age-standardised all-cause disability-adjusted life year (DALY) rates attributable to occupational risks (per 100,000 population) |                        |                        | Indicator 11.6.2: Population-weighted mean levels of fine particulate matter smaller than 2.5 microns (PM2.5) |                        |                        | Indicator 16.1.1: Age-standardised death rate due to interpersonal violence (per 100,000 population) |                        |                        | Indicator 16.1.2: Age-standardised death rate due to collective violence and legal intervention (per 100,000 population) |                           |                           |
|----------------|----------------------------------------------------------------------------------------------------------------------------------------------------|------------------------|------------------------|---------------------------------------------------------------------------------------------------------------|------------------------|------------------------|------------------------------------------------------------------------------------------------------|------------------------|------------------------|--------------------------------------------------------------------------------------------------------------------------|---------------------------|---------------------------|
|                | 1990                                                                                                                                               | 2000                   | 2015                   | 1990                                                                                                          | 2000                   | 2015                   | 1990                                                                                                 | 2000                   | 2015                   | 1990                                                                                                                     | 2000                      | 2015                      |
| Malta          | 52.18<br>(44.40-60.77)                                                                                                                             | 55.28<br>(48.23-61.77) | 70.15<br>(57.98-82.67) | 61.26<br>(53.84-68.16)                                                                                        | 63.32<br>(55.55-70.49) | 59.19<br>(52.06-65.94) | 65.35<br>(62.36-68.25)                                                                               | 66.83<br>(63.90-69.81) | 74.07<br>(70.71-77.09) | 21.80<br>(13.32-48.08)                                                                                                   | 100.00<br>(100.00-100.00) | 100.00<br>(100.00-100.00) |
| Netherlands    | 64.91<br>(55.61-77.11)                                                                                                                             | 66.95<br>(58.33-77.27) | 69.98<br>(62.47-77.65) | 54.67<br>(49.71-60.29)                                                                                        | 58.89<br>(53.47-64.07) | 60.75<br>(55.01-65.67) | 69.99<br>(67.01-72.80)                                                                               | 66.77<br>(63.97-69.35) | 74.28<br>(70.78-77.37) | 100.00<br>(100.00-100.00)                                                                                                | 100.00<br>(100.00-100.00) | 100.00<br>(100.00-100.00) |
| Norway         | 67.78<br>(61.99-73.56)                                                                                                                             | 68.12<br>(62.70-73.42) | 72.92<br>(68.17-77.77) | 68.70<br>(62.27-73.13)                                                                                        | 71.06<br>(64.37-75.55) | 72.34<br>(65.61-76.86) | 70.22<br>(67.32-73.14)                                                                               | 73.06<br>(69.97-75.88) | 81.23<br>(77.14-84.21) | 100.00<br>(100.00-100.00)                                                                                                | 100.00<br>(100.00-100.00) | 100.00<br>(100.00-100.00) |
| Portugal       | 53.06<br>(45.39-60.70)                                                                                                                             | 52.41<br>(45.91-58.53) | 58.13<br>(50.75-65.43) | 70.31<br>(63.68-75.14)                                                                                        | 70.83<br>(64.33-75.36) | 70.61<br>(63.94-75.11) | 54.50<br>(51.68-56.97)                                                                               | 58.54<br>(55.77-61.19) | 66.71<br>(63.19-69.25) | 100.00<br>(100.00-100.00)                                                                                                | 100.00<br>(100.00-100.00) | 100.00<br>(100.00-100.00) |
| Spain          | 57.48<br>(49.88-64.72)                                                                                                                             | 56.88<br>(52.32-61.79) | 73.00<br>(67.83-77.73) | 69.14<br>(62.64-73.56)                                                                                        | 69.86<br>(63.42-74.29) | 70.66<br>(64.14-75.04) | 72.74<br>(69.54-75.47)                                                                               | 73.44<br>(70.40-76.16) | 81.71<br>(77.99-84.48) | 100.00<br>(100.00-100.00)                                                                                                | 100.00<br>(100.00-100.00) | 100.00<br>(100.00-100.00) |
| Sweden         | 74.97<br>(70.04-79.65)                                                                                                                             | 78.52<br>(73.64-83.26) | 80.95<br>(75.55-85.84) | 80.08<br>(72.19-84.78)                                                                                        | 82.37<br>(74.50-87.22) | 81.15<br>(73.49-85.98) | 65.60<br>(62.83-68.35)                                                                               | 69.26<br>(66.42-72.25) | 74.31<br>(70.95-77.31) | 100.00<br>(100.00-100.00)                                                                                                | 100.00<br>(100.00-100.00) | 100.00<br>(100.00-100.00) |
| Switzerland    | 63.07<br>(56.68-69.37)                                                                                                                             | 59.82<br>(54.13-65.65) | 63.56<br>(57.66-69.48) | 63.14<br>(57.41-67.68)                                                                                        | 67.14<br>(60.84-71.55) | 63.87<br>(57.98-68.32) | 68.30<br>(65.31-70.97)                                                                               | 71.14<br>(68.03-73.92) | 81.65<br>(78.10-84.56) | 100.00<br>(100.00-100.00)                                                                                                | 100.00<br>(100.00-100.00) | 100.00<br>(100.00-100.00) |
| United Kingdom | 66.44<br>(59.86-72.55)                                                                                                                             | 68.25<br>(61.76-75.46) | 74.33<br>(68.43-81.08) | 60.42<br>(54.81-65.33)                                                                                        | 63.71<br>(57.85-68.04) | 64.80<br>(58.77-69.06) | 75.94<br>(72.91-78.47)                                                                               | 79.03<br>(75.91-81.50) | 85.89<br>(82.38-88.36) | 40.01<br>(24.67-61.88)                                                                                                   | 64.90<br>(45.24-84.65)    | 100.00<br>(100.00-100.00) |
| Argentina      | 43.66<br>(38.37-48.48)                                                                                                                             | 44.55<br>(40.33-48.88) | 46.70<br>(41.56-51.70) | 58.55<br>(53.10-63.80)                                                                                        | 59.06<br>(53.42-64.15) | 62.84<br>(56.95-67.40) | 41.19<br>(38.75-43.49)                                                                               | 39.35<br>(37.07-41.53) | 41.74<br>(38.77-44.66) | 15.13<br>(9.72-31.20)                                                                                                    | 28.29<br>(18.54-55.33)    | 100.00<br>(100.00-100.00) |
| Chile          | 63.00<br>(59.02-67.15)                                                                                                                             | 68.84<br>(65.39-72.38) | 69.51<br>(66.02-72.83) | 52.15<br>(47.11-57.85)                                                                                        | 50.59<br>(45.84-56.54) | 51.78<br>(46.97-57.64) | 40.16<br>(37.70-42.61)                                                                               | 44.42<br>(41.76-47.10) | 48.28<br>(45.02-51.80) | 100.00<br>(100.00-100.00)                                                                                                | 100.00<br>(100.00-100.00) | 100.00<br>(100.00-100.00) |
| Uruguay        | 57.23<br>(53.19-61.28)                                                                                                                             | 58.73<br>(55.09-62.35) | 57.77<br>(54.01-62.04) | 63.62<br>(57.68-68.46)                                                                                        | 63.04<br>(57.18-68.06) | 66.69<br>(60.33-71.55) | 48.77<br>(45.73-51.59)                                                                               | 44.57<br>(42.08-47.11) | 44.12<br>(40.98-46.94) | 100.00<br>(100.00-100.00)                                                                                                | 100.00<br>(100.00-100.00) | 100.00<br>(100.00-100.00) |

**Appendix Table 1a. Scaled values for each SDG health-related indicator and three summary indicators by country for 1990, 2000, and 2015**

| Location               | Indicator 8.8.1: Age-standardised all-cause disability-adjusted life year (DALY) rates attributable to occupational risks (per 100,000 population) |                        |                        | Indicator 11.6.2: Population-weighted mean levels of fine particulate matter smaller than 2.5 microns (PM2.5) |                        |                        | Indicator 16.1.1: Age-standardised death rate due to interpersonal violence (per 100,000 population) |                        |                         | Indicator 16.1.2: Age-standardised death rate due to collective violence and legal intervention (per 100,000 population) |                           |                           |
|------------------------|----------------------------------------------------------------------------------------------------------------------------------------------------|------------------------|------------------------|---------------------------------------------------------------------------------------------------------------|------------------------|------------------------|------------------------------------------------------------------------------------------------------|------------------------|-------------------------|--------------------------------------------------------------------------------------------------------------------------|---------------------------|---------------------------|
|                        | 1990                                                                                                                                               | 2000                   | 2015                   | 1990                                                                                                          | 2000                   | 2015                   | 1990                                                                                                 | 2000                   | 2015                    | 1990                                                                                                                     | 2000                      | 2015                      |
| Belarus                | 52.58<br>(46.25-58.86)                                                                                                                             | 57.31<br>(51.37-63.27) | 65.73<br>(59.44-71.07) | 39.68<br>(35.14-46.63)                                                                                        | 52.60<br>(47.06-58.80) | 52.40<br>(45.89-58.66) | 36.24<br>(34.04-38.36)                                                                               | 26.97<br>(25.10-30.28) | 32.47<br>(28.64-36.15)  | 100.00<br>(100.00-100.00)                                                                                                | 100.00<br>(100.00-100.00) | 100.00<br>(100.00-100.00) |
| Estonia                | 57.12<br>(50.57-63.16)                                                                                                                             | 62.44<br>(58.26-66.59) | 70.72<br>(66.20-75.16) | 66.25<br>(60.07-71.08)                                                                                        | 75.16<br>(67.64-80.14) | 71.51<br>(64.50-76.43) | 29.86<br>(27.81-32.06)                                                                               | 25.47<br>(23.78-27.41) | 47.74<br>(43.17-50.34)  | 100.00<br>(100.00-100.00)                                                                                                | 100.00<br>(100.00-100.00) | 100.00<br>(100.00-100.00) |
| Latvia                 | 55.09<br>(48.67-60.89)                                                                                                                             | 59.75<br>(53.53-65.16) | 67.52<br>(61.09-73.01) | 42.37<br>(37.69-49.24)                                                                                        | 55.27<br>(49.85-61.26) | 52.44<br>(47.25-58.21) | 31.95<br>(29.83-34.32)                                                                               | 27.97<br>(25.85-30.01) | 41.18<br>(37.99-43.59)  | 100.00<br>(100.00-100.00)                                                                                                | 100.00<br>(100.00-100.00) | 100.00<br>(100.00-100.00) |
| Lithuania              | 46.65<br>(39.72-53.25)                                                                                                                             | 46.83<br>(41.56-52.18) | 60.86<br>(56.43-65.20) | 41.75<br>(37.65-48.55)                                                                                        | 54.93<br>(49.58-60.32) | 54.16<br>(49.04-59.87) | 36.64<br>(34.35-39.10)                                                                               | 32.02<br>(29.81-34.03) | 41.05<br>(38.30-43.38)  | 100.00<br>(100.00-100.00)                                                                                                | 100.00<br>(100.00-100.00) | 100.00<br>(100.00-100.00) |
| Moldova                | 46.16<br>(39.27-53.03)                                                                                                                             | 48.56<br>(40.83-55.85) | 68.89<br>(63.06-74.86) | 37.60<br>(31.17-44.63)                                                                                        | 50.58<br>(44.92-56.90) | 52.31<br>(46.76-58.60) | 31.94<br>(29.93-34.22)                                                                               | 31.02<br>(29.15-33.22) | 44.66<br>(41.43-47.13)  | 100.00<br>(100.00-100.00)                                                                                                | 100.00<br>(100.00-100.00) | 100.00<br>(100.00-100.00) |
| Russia                 | 56.69<br>(50.15-62.89)                                                                                                                             | 59.61<br>(53.77-65.06) | 66.92<br>(60.53-72.47) | 50.41<br>(45.69-56.08)                                                                                        | 59.61<br>(54.07-64.52) | 57.57<br>(52.17-62.65) | 23.31<br>(21.56-25.29)                                                                               | 11.07<br>(9.97-12.60)  | 24.98<br>(22.86-27.07)  | 22.24<br>(14.31-42.64)                                                                                                   | 5.47<br>(3.73-8.29)       | 30.65<br>(20.15-59.18)    |
| Ukraine                | 54.07<br>(48.14-59.69)                                                                                                                             | 55.77<br>(50.04-61.21) | 59.61<br>(53.29-65.79) | 39.80<br>(35.87-46.46)                                                                                        | 52.82<br>(47.89-58.56) | 54.41<br>(49.27-59.96) | 34.41<br>(32.24-36.68)                                                                               | 24.24<br>(22.65-26.22) | 37.64<br>(34.29-40.03)  | 100.00<br>(100.00-100.00)                                                                                                | 100.00<br>(100.00-100.00) | 3.20<br>(1.96-6.17)       |
| Albania                | 38.57<br>(30.54-46.71)                                                                                                                             | 39.63<br>(31.51-47.94) | 46.67<br>(39.50-54.03) | 55.89<br>(50.70-61.07)                                                                                        | 61.35<br>(55.45-66.54) | 55.72<br>(50.12-61.06) | 42.72<br>(39.50-50.70)                                                                               | 34.31<br>(31.53-49.17) | 62.46<br>(57.37-65.86)  | 100.00<br>(100.00-100.00)                                                                                                | 27.56<br>(18.16-48.80)    | 100.00<br>(100.00-100.00) |
| Bosnia and Herzegovina | 64.88<br>(58.45-70.95)                                                                                                                             | 67.36<br>(60.99-73.23) | 70.15<br>(64.63-75.49) | 30.79<br>(27.64-38.80)                                                                                        | 36.35<br>(32.25-43.54) | 30.40<br>(26.74-38.28) | 95.94<br>(85.25-100.00)                                                                              | 91.77<br>(87.02-96.23) | 56.64<br>(50.76-100.00) | 2.53<br>(1.27-4.74)                                                                                                      | 100.00<br>(100.00-100.00) | 100.00<br>(100.00-100.00) |
| Bulgaria               | 56.75<br>(49.51-62.84)                                                                                                                             | 59.45<br>(54.67-63.99) | 66.08<br>(60.58-71.20) | 31.70<br>(28.44-39.39)                                                                                        | 43.29<br>(39.23-49.95) | 44.21<br>(39.85-50.88) | 49.77<br>(47.34-52.22)                                                                               | 49.13<br>(46.51-51.65) | 59.96<br>(56.77-62.84)  | 100.00<br>(100.00-100.00)                                                                                                | 100.00<br>(100.00-100.00) | 100.00<br>(100.00-100.00) |
| Croatia                | 60.16<br>(54.20-65.94)                                                                                                                             | 58.60<br>(52.74-64.13) | 63.23<br>(57.28-69.37) | 47.50<br>(42.86-53.51)                                                                                        | 55.57<br>(50.15-61.03) | 50.79<br>(46.06-56.17) | 53.80<br>(51.08-56.28)                                                                               | 58.37<br>(55.80-60.82) | 72.00<br>(68.52-74.73)  | 100.00<br>(100.00-100.00)                                                                                                | 31.06<br>(19.62-58.56)    | 100.00<br>(100.00-100.00) |

**Appendix Table 1a. Scaled values for each SDG health-related indicator and three summary indicators by country for 1990, 2000, and 2015**

| Location       | Indicator 8.8.1: Age-standardised all-cause disability-adjusted life year (DALY) rates attributable to occupational risks (per 100,000 population) |                        |                        | Indicator 11.6.2: Population-weighted mean levels of fine particulate matter smaller than 2.5 microns (PM2.5) |                        |                        | Indicator 16.1.1: Age-standardised death rate due to interpersonal violence (per 100,000 population) |                        |                        | Indicator 16.1.2: Age-standardised death rate due to collective violence and legal intervention (per 100,000 population) |                           |                           |
|----------------|----------------------------------------------------------------------------------------------------------------------------------------------------|------------------------|------------------------|---------------------------------------------------------------------------------------------------------------|------------------------|------------------------|------------------------------------------------------------------------------------------------------|------------------------|------------------------|--------------------------------------------------------------------------------------------------------------------------|---------------------------|---------------------------|
|                | 1990                                                                                                                                               | 2000                   | 2015                   | 1990                                                                                                          | 2000                   | 2015                   | 1990                                                                                                 | 2000                   | 2015                   | 1990                                                                                                                     | 2000                      | 2015                      |
| Czech Republic | 56.78<br>(51.45-62.09)                                                                                                                             | 59.40<br>(55.19-63.53) | 67.80<br>(62.35-72.94) | 36.94<br>(33.28-44.25)                                                                                        | 51.72<br>(47.00-57.21) | 51.22<br>(46.31-57.18) | 60.39<br>(57.57-62.88)                                                                               | 63.01<br>(60.26-65.71) | 73.61<br>(69.75-76.34) | 100.00<br>(100.00-100.00)                                                                                                | 100.00<br>(100.00-100.00) | 100.00<br>(100.00-100.00) |
| Hungary        | 65.91<br>(61.04-70.63)                                                                                                                             | 69.70<br>(65.60-73.51) | 74.26<br>(69.53-78.29) | 36.06<br>(32.27-43.56)                                                                                        | 47.98<br>(43.41-53.85) | 49.33<br>(44.73-55.17) | 52.53<br>(50.07-54.95)                                                                               | 55.87<br>(53.16-58.21) | 68.79<br>(64.53-71.73) | 100.00<br>(100.00-100.00)                                                                                                | 100.00<br>(100.00-100.00) | 100.00<br>(100.00-100.00) |
| Macedonia      | 63.91<br>(57.24-69.58)                                                                                                                             | 64.69<br>(59.08-70.09) | 69.18<br>(64.69-73.68) | 28.04<br>(24.38-35.91)                                                                                        | 37.85<br>(34.08-44.81) | 34.64<br>(30.75-42.41) | 56.84<br>(53.70-60.20)                                                                               | 52.34<br>(49.20-61.06) | 59.35<br>(55.50-66.11) | 100.00<br>(100.00-100.00)                                                                                                | 100.00<br>(100.00-100.00) | 100.00<br>(100.00-100.00) |
| Montenegro     | 61.91<br>(55.16-67.98)                                                                                                                             | 63.09<br>(56.37-69.52) | 67.24<br>(60.65-73.18) | 48.38<br>(43.98-54.39)                                                                                        | 54.93<br>(49.72-60.23) | 49.01<br>(44.26-54.94) | 41.06<br>(36.92-44.48)                                                                               | 40.15<br>(37.92-42.37) | 48.07<br>(44.21-51.60) | 100.00<br>(100.00-100.00)                                                                                                | 26.19<br>(21.21-29.88)    | 100.00<br>(100.00-100.00) |
| Poland         | 49.68<br>(43.16-55.48)                                                                                                                             | 56.06<br>(49.96-61.83) | 64.42<br>(59.04-69.46) | 31.47<br>(28.22-39.54)                                                                                        | 45.93<br>(41.62-52.22) | 48.00<br>(43.45-53.88) | 53.03<br>(50.65-55.26)                                                                               | 54.04<br>(51.46-56.49) | 65.31<br>(62.30-67.91) | 100.00<br>(100.00-100.00)                                                                                                | 100.00<br>(100.00-100.00) | 100.00<br>(100.00-100.00) |
| Romania        | 42.00<br>(34.79-49.07)                                                                                                                             | 41.95<br>(35.16-48.60) | 49.45<br>(43.80-55.22) | 40.01<br>(36.04-46.93)                                                                                        | 51.51<br>(46.79-57.17) | 53.48<br>(48.51-58.87) | 47.86<br>(45.47-50.34)                                                                               | 51.29<br>(48.67-53.79) | 61.25<br>(57.90-64.04) | 17.99<br>(11.59-33.10)                                                                                                   | 100.00<br>(100.00-100.00) | 100.00<br>(100.00-100.00) |
| Serbia         | 52.33<br>(45.06-58.87)                                                                                                                             | 52.29<br>(45.64-58.57) | 59.57<br>(53.67-64.89) | 46.89<br>(42.50-52.83)                                                                                        | 53.40<br>(48.15-58.93) | 51.19<br>(46.27-56.77) | 45.73<br>(43.06-49.98)                                                                               | 46.85<br>(44.50-50.08) | 55.38<br>(52.40-57.95) | 100.00<br>(100.00-100.00)                                                                                                | 4.19<br>(2.39-8.26)       | 100.00<br>(100.00-100.00) |
| Slovakia       | 67.67<br>(62.59-72.33)                                                                                                                             | 69.40<br>(63.30-74.38) | 74.00<br>(68.39-79.34) | 38.12<br>(34.36-45.26)                                                                                        | 50.93<br>(46.21-56.33) | 52.29<br>(47.32-58.17) | 51.26<br>(46.53-53.86)                                                                               | 52.51<br>(49.51-54.78) | 59.89<br>(56.37-62.94) | 100.00<br>(100.00-100.00)                                                                                                | 100.00<br>(100.00-100.00) | 100.00<br>(100.00-100.00) |
| Slovenia       | 61.43<br>(55.71-67.25)                                                                                                                             | 58.69<br>(53.63-64.06) | 68.32<br>(62.93-73.46) | 47.70<br>(42.97-53.95)                                                                                        | 57.40<br>(51.95-62.49) | 52.51<br>(47.64-58.26) | 58.74<br>(56.03-61.19)                                                                               | 63.68<br>(60.87-66.35) | 80.95<br>(75.73-83.83) | 100.00<br>(100.00-100.00)                                                                                                | 100.00<br>(100.00-100.00) | 100.00<br>(100.00-100.00) |
| Armenia        | 34.34<br>(23.98-42.34)                                                                                                                             | 35.58<br>(27.10-43.86) | 42.99<br>(36.60-49.13) | 52.42<br>(43.19-60.67)                                                                                        | 55.13<br>(45.80-62.92) | 47.05<br>(37.33-55.82) | 46.07<br>(43.46-48.79)                                                                               | 42.21<br>(38.81-48.66) | 44.71<br>(41.03-49.85) | 100.00<br>(100.00-100.00)                                                                                                | 100.00<br>(100.00-100.00) | 100.00<br>(100.00-100.00) |
| Azerbaijan     | 29.10<br>(15.41-40.01)                                                                                                                             | 52.15<br>(46.74-57.32) | 39.29<br>(30.87-51.46) | 45.53<br>(40.87-51.78)                                                                                        | 48.76<br>(43.37-54.71) | 42.28<br>(36.73-49.39) | 32.86<br>(30.26-39.40)                                                                               | 38.89<br>(36.48-41.19) | 50.47<br>(45.26-54.17) | 100.00<br>(100.00-100.00)                                                                                                | 100.00<br>(100.00-100.00) | 100.00<br>(100.00-100.00) |

**Appendix Table 1a. Scaled values for each SDG health-related indicator and three summary indicators by country for 1990, 2000, and 2015**

| Location     | Indicator 8.8.1: Age-standardised all-cause disability-adjusted life year (DALY) rates attributable to occupational risks (per 100,000 population) |                        |                        | Indicator 11.6.2: Population-weighted mean levels of fine particulate matter smaller than 2.5 microns (PM2.5) |                        |                        | Indicator 16.1.1: Age-standardised death rate due to interpersonal violence (per 100,000 population) |                        |                        | Indicator 16.1.2: Age-standardised death rate due to collective violence and legal intervention (per 100,000 population) |                           |                           |
|--------------|----------------------------------------------------------------------------------------------------------------------------------------------------|------------------------|------------------------|---------------------------------------------------------------------------------------------------------------|------------------------|------------------------|------------------------------------------------------------------------------------------------------|------------------------|------------------------|--------------------------------------------------------------------------------------------------------------------------|---------------------------|---------------------------|
|              | 1990                                                                                                                                               | 2000                   | 2015                   | 1990                                                                                                          | 2000                   | 2015                   | 1990                                                                                                 | 2000                   | 2015                   | 1990                                                                                                                     | 2000                      | 2015                      |
| Georgia      | 44.28<br>(33.41-52.09)                                                                                                                             | 42.44<br>(34.07-51.27) | 40.51<br>(32.13-48.46) | 54.95<br>(49.71-60.41)                                                                                        | 58.94<br>(53.20-64.78) | 52.37<br>(47.19-58.20) | 48.39<br>(45.72-51.49)                                                                               | 47.69<br>(44.59-51.09) | 51.64<br>(47.33-55.06) | 100.00<br>(100.00-100.00)                                                                                                | 16.45<br>(11.89-26.45)    | 100.00<br>(100.00-100.00) |
| Kazakhstan   | 32.95<br>(26.50-39.01)                                                                                                                             | 30.49<br>(25.38-36.11) | 37.95<br>(29.45-45.97) | 52.61<br>(47.67-58.35)                                                                                        | 57.76<br>(52.29-62.76) | 53.39<br>(48.00-58.98) | 28.09<br>(25.94-30.36)                                                                               | 21.81<br>(20.21-23.72) | 28.14<br>(25.31-31.18) | 100.00<br>(100.00-100.00)                                                                                                | 100.00<br>(100.00-100.00) | 100.00<br>(100.00-100.00) |
| Kyrgyzstan   | 38.37<br>(31.58-44.80)                                                                                                                             | 27.38<br>(21.22-34.01) | 42.36<br>(35.78-48.05) | 57.15<br>(52.04-62.29)                                                                                        | 60.20<br>(54.56-64.98) | 57.16<br>(51.40-62.70) | 29.05<br>(26.38-33.58)                                                                               | 31.99<br>(29.60-34.24) | 38.84<br>(34.41-42.15) | 100.00<br>(100.00-100.00)                                                                                                | 13.94<br>(10.09-22.22)    | 100.00<br>(100.00-100.00) |
| Mongolia     | 38.20<br>(28.95-45.82)                                                                                                                             | 38.05<br>(28.09-45.71) | 41.65<br>(32.61-49.24) | 55.77<br>(50.57-61.14)                                                                                        | 54.03<br>(48.93-59.88) | 48.76<br>(43.68-55.21) | 31.54<br>(27.65-35.38)                                                                               | 28.61<br>(25.73-31.42) | 32.64<br>(29.12-36.07) | 100.00<br>(100.00-100.00)                                                                                                | 100.00<br>(100.00-100.00) | 100.00<br>(100.00-100.00) |
| Tajikistan   | 35.65<br>(24.24-44.28)                                                                                                                             | 38.15<br>(26.84-47.75) | 42.17<br>(34.05-50.90) | 18.18<br>(13.62-27.52)                                                                                        | 22.89<br>(15.76-32.53) | 29.05<br>(22.00-37.56) | 38.66<br>(35.77-43.95)                                                                               | 36.23<br>(33.72-41.65) | 54.06<br>(47.31-58.20) | 100.00<br>(100.00-100.00)                                                                                                | 11.41<br>(8.22-18.09)     | 100.00<br>(100.00-100.00) |
| Turkmenistan | 42.11<br>(33.01-49.59)                                                                                                                             | 42.56<br>(32.79-50.24) | 51.65<br>(42.55-59.60) | 36.43<br>(32.24-43.30)                                                                                        | 38.41<br>(33.11-45.48) | 41.49<br>(35.67-48.42) | 38.22<br>(35.43-42.00)                                                                               | 38.22<br>(35.77-40.88) | 44.65<br>(40.42-48.31) | 100.00<br>(100.00-100.00)                                                                                                | 100.00<br>(100.00-100.00) | 100.00<br>(100.00-100.00) |
| Uzbekistan   | 41.57<br>(32.35-48.77)                                                                                                                             | 43.78<br>(33.85-51.81) | 48.44<br>(40.19-57.02) | 28.55<br>(23.95-36.61)                                                                                        | 34.94<br>(30.47-42.72) | 35.19<br>(30.52-42.66) | 38.82<br>(35.88-46.26)                                                                               | 48.43<br>(44.51-50.86) | 52.58<br>(47.84-57.07) | 100.00<br>(100.00-100.00)                                                                                                | 8.92<br>(6.38-13.58)      | 100.00<br>(100.00-100.00) |
| Colombia     | 52.28<br>(46.71-57.26)                                                                                                                             | 51.07<br>(45.49-56.09) | 53.84<br>(49.12-58.47) | 51.40<br>(46.58-56.97)                                                                                        | 52.41<br>(47.62-58.09) | 55.60<br>(50.58-60.85) | 0.25<br>(0.00-1.86)                                                                                  | 1.10<br>(0.59-2.82)    | 11.85<br>(10.21-13.97) | 6.78<br>(5.26-7.73)                                                                                                      | 4.34<br>(3.05-5.35)       | 100.00<br>(100.00-100.00) |
| Costa Rica   | 58.00<br>(51.99-63.38)                                                                                                                             | 56.39<br>(51.75-61.12) | 62.33<br>(55.97-68.08) | 51.32<br>(46.50-56.78)                                                                                        | 50.53<br>(45.53-56.49) | 52.81<br>(47.69-58.39) | 41.84<br>(39.40-44.37)                                                                               | 40.46<br>(38.05-42.78) | 36.36<br>(33.85-39.25) | 100.00<br>(100.00-100.00)                                                                                                | 100.00<br>(100.00-100.00) | 100.00<br>(100.00-100.00) |
| El Salvador  | 57.93<br>(51.26-63.65)                                                                                                                             | 60.85<br>(54.81-66.99) | 61.59<br>(54.62-67.20) | 35.34<br>(30.90-42.40)                                                                                        | 33.14<br>(29.23-40.62) | 37.03<br>(32.94-44.46) | 3.24<br>(1.36-5.38)                                                                                  | 3.52<br>(2.29-6.10)    | 3.30<br>(1.13-7.11)    | 1.71<br>(0.99-2.43)                                                                                                      | 26.31<br>(20.25-34.93)    | 100.00<br>(100.00-100.00) |
| Guatemala    | 49.49<br>(43.10-55.37)                                                                                                                             | 51.25<br>(45.13-57.35) | 52.93<br>(46.88-58.72) | 38.22<br>(34.48-45.32)                                                                                        | 35.82<br>(32.12-43.21) | 38.60<br>(34.87-45.53) | 9.85<br>(8.43-11.54)                                                                                 | 9.53<br>(8.39-11.30)   | 9.33<br>(6.72-12.26)   | 2.98<br>(1.89-4.10)                                                                                                      | 23.94<br>(18.28-32.73)    | 100.00<br>(100.00-100.00) |

**Appendix Table 1a. Scaled values for each SDG health-related indicator and three summary indicators by country for 1990, 2000, and 2015**

| Location            | Indicator 8.8.1: Age-standardised all-cause disability-adjusted life year (DALY) rates attributable to occupational risks (per 100,000 population) |                        |                        | Indicator 11.6.2: Population-weighted mean levels of fine particulate matter smaller than 2.5 microns (PM2.5) |                        |                        | Indicator 16.1.1: Age-standardised death rate due to interpersonal violence (per 100,000 population) |                        |                        | Indicator 16.1.2: Age-standardised death rate due to collective violence and legal intervention (per 100,000 population) |                           |                           |
|---------------------|----------------------------------------------------------------------------------------------------------------------------------------------------|------------------------|------------------------|---------------------------------------------------------------------------------------------------------------|------------------------|------------------------|------------------------------------------------------------------------------------------------------|------------------------|------------------------|--------------------------------------------------------------------------------------------------------------------------|---------------------------|---------------------------|
|                     | 1990                                                                                                                                               | 2000                   | 2015                   | 1990                                                                                                          | 2000                   | 2015                   | 1990                                                                                                 | 2000                   | 2015                   | 1990                                                                                                                     | 2000                      | 2015                      |
| Honduras            | 52.70<br>(46.00-58.32)                                                                                                                             | 51.02<br>(44.18-57.07) | 52.28<br>(46.03-57.97) | 38.03<br>(34.00-45.55)                                                                                        | 36.83<br>(32.78-43.94) | 36.61<br>(32.75-44.31) | 16.12<br>(13.99-18.46)                                                                               | 8.31<br>(4.46-17.84)   | 6.50<br>(1.63-18.65)   | 100.00<br>(100.00-100.00)                                                                                                | 100.00<br>(100.00-100.00) | 100.00<br>(100.00-100.00) |
| Mexico              | 54.24<br>(50.86-57.71)                                                                                                                             | 55.06<br>(51.61-58.63) | 56.52<br>(53.30-59.84) | 47.67<br>(43.25-53.70)                                                                                        | 43.50<br>(39.46-50.11) | 52.64<br>(47.62-58.19) | 17.21<br>(16.00-18.75)                                                                               | 25.47<br>(23.96-27.29) | 23.16<br>(21.61-25.11) | 47.64<br>(19.73-69.46)                                                                                                   | 100.00<br>(100.00-100.00) | 100.00<br>(100.00-100.00) |
| Nicaragua           | 52.70<br>(44.74-59.53)                                                                                                                             | 52.77<br>(48.21-57.61) | 53.98<br>(48.30-58.87) | 39.81<br>(34.57-47.37)                                                                                        | 39.07<br>(32.06-46.57) | 45.00<br>(38.69-51.98) | 29.27<br>(26.97-31.65)                                                                               | 29.77<br>(27.69-31.90) | 31.90<br>(28.80-35.11) | 9.45<br>(7.59-10.73)                                                                                                     | 100.00<br>(100.00-100.00) | 100.00<br>(100.00-100.00) |
| Panama              | 43.77<br>(35.26-51.38)                                                                                                                             | 45.78<br>(40.12-51.48) | 58.26<br>(51.24-64.84) | 58.69<br>(53.15-63.71)                                                                                        | 58.13<br>(52.01-63.69) | 63.34<br>(56.61-68.80) | 31.35<br>(28.25-34.00)                                                                               | 29.47<br>(27.22-31.87) | 22.63<br>(18.98-30.52) | 100.00<br>(100.00-100.00)                                                                                                | 19.56<br>(14.33-29.75)    | 100.00<br>(100.00-100.00) |
| Venezuela           | 52.92<br>(46.19-59.03)                                                                                                                             | 52.36<br>(45.29-58.59) | 53.40<br>(46.55-58.99) | 40.53<br>(36.58-47.16)                                                                                        | 40.40<br>(36.26-47.54) | 48.57<br>(43.94-54.85) | 25.62<br>(23.61-27.77)                                                                               | 13.35<br>(12.26-14.70) | 7.73<br>(5.22-10.44)   | 18.11<br>(13.86-24.58)                                                                                                   | 8.67<br>(6.45-11.55)      | 100.00<br>(100.00-100.00) |
| Bolivia             | 31.40<br>(9.03-46.45)                                                                                                                              | 42.40<br>(37.21-47.83) | 42.05<br>(30.39-49.84) | 44.44<br>(40.18-50.61)                                                                                        | 42.35<br>(38.24-49.24) | 44.35<br>(40.05-51.07) | 29.16<br>(23.04-33.60)                                                                               | 32.89<br>(27.97-35.86) | 37.11<br>(32.09-42.09) | 100.00<br>(100.00-100.00)                                                                                                | 14.11<br>(9.10-28.81)     | 100.00<br>(100.00-100.00) |
| Ecuador             | 61.57<br>(44.55-67.71)                                                                                                                             | 59.78<br>(44.71-65.79) | 58.06<br>(40.40-64.69) | 56.30<br>(51.07-61.62)                                                                                        | 55.66<br>(50.33-60.75) | 63.97<br>(58.11-68.54) | 26.48<br>(24.08-28.82)                                                                               | 21.07<br>(18.87-26.45) | 25.25<br>(22.03-30.05) | 100.00<br>(100.00-100.00)                                                                                                | 100.00<br>(100.00-100.00) | 100.00<br>(100.00-100.00) |
| Peru                | 51.71<br>(42.02-58.08)                                                                                                                             | 52.15<br>(43.43-58.25) | 53.99<br>(41.34-60.72) | 44.76<br>(40.16-51.29)                                                                                        | 38.17<br>(34.40-45.41) | 44.50<br>(40.28-50.88) | 36.97<br>(34.22-43.01)                                                                               | 47.07<br>(44.56-49.46) | 52.67<br>(48.21-56.88) | 3.69<br>(2.59-4.44)                                                                                                      | 100.00<br>(100.00-100.00) | 100.00<br>(100.00-100.00) |
| Antigua and Barbuda | 63.23<br>(58.55-67.28)                                                                                                                             | 62.66<br>(58.47-66.78) | 63.31<br>(59.45-66.97) | 57.93<br>(42.89-73.43)                                                                                        | 57.61<br>(42.27-72.62) | 62.99<br>(48.40-77.25) | 49.77<br>(46.52-53.03)                                                                               | 44.29<br>(41.13-47.37) | 40.90<br>(37.31-44.57) | 100.00<br>(100.00-100.00)                                                                                                | 100.00<br>(100.00-100.00) | 100.00<br>(100.00-100.00) |
| The Bahamas         | 52.12<br>(46.54-56.88)                                                                                                                             | 57.02<br>(51.62-61.73) | 57.91<br>(51.86-62.56) | 54.30<br>(42.19-66.02)                                                                                        | 55.32<br>(42.85-67.73) | 62.92<br>(49.74-74.08) | 23.09<br>(20.37-25.63)                                                                               | 22.01<br>(18.98-24.94) | 20.02<br>(16.64-25.56) | 100.00<br>(100.00-100.00)                                                                                                | 100.00<br>(100.00-100.00) | 100.00<br>(100.00-100.00) |
| Barbados            | 63.20<br>(59.28-66.88)                                                                                                                             | 67.09<br>(63.15-70.93) | 67.38<br>(63.14-71.39) | 53.44<br>(37.65-70.03)                                                                                        | 53.90<br>(35.76-72.28) | 60.56<br>(45.11-76.43) | 39.20<br>(36.45-41.90)                                                                               | 35.75<br>(32.95-38.48) | 30.03<br>(26.90-33.54) | 18.97<br>(12.22-38.43)                                                                                                   | 100.00<br>(100.00-100.00) | 100.00<br>(100.00-100.00) |

**Appendix Table 1a. Scaled values for each SDG health-related indicator and three summary indicators by country for 1990, 2000, and 2015**

| Location                         | Indicator 8.8.1: Age-standardised all-cause disability-adjusted life year (DALY) rates attributable to occupational risks (per 100,000 population) |                        |                        | Indicator 11.6.2: Population-weighted mean levels of fine particulate matter smaller than 2.5 microns (PM2.5) |                        |                        | Indicator 16.1.1: Age-standardised death rate due to interpersonal violence (per 100,000 population) |                        |                        | Indicator 16.1.2: Age-standardised death rate due to collective violence and legal intervention (per 100,000 population) |                           |                           |
|----------------------------------|----------------------------------------------------------------------------------------------------------------------------------------------------|------------------------|------------------------|---------------------------------------------------------------------------------------------------------------|------------------------|------------------------|------------------------------------------------------------------------------------------------------|------------------------|------------------------|--------------------------------------------------------------------------------------------------------------------------|---------------------------|---------------------------|
|                                  | 1990                                                                                                                                               | 2000                   | 2015                   | 1990                                                                                                          | 2000                   | 2015                   | 1990                                                                                                 | 2000                   | 2015                   | 1990                                                                                                                     | 2000                      | 2015                      |
| Belize                           | 56.06<br>(52.00-60.06)                                                                                                                             | 50.19<br>(45.47-54.68) | 51.03<br>(45.26-55.96) | 43.03<br>(38.26-49.64)                                                                                        | 43.05<br>(38.42-49.83) | 45.25<br>(40.41-51.67) | 34.54<br>(25.93-37.97)                                                                               | 21.73<br>(19.69-24.48) | 17.64<br>(14.14-24.96) | 8.11<br>(5.22-15.84)                                                                                                     | 100.00<br>(100.00-100.00) | 100.00<br>(100.00-100.00) |
| Cuba                             | 49.27<br>(43.29-54.93)                                                                                                                             | 50.29<br>(44.41-55.90) | 51.58<br>(45.38-62.93) | 49.50<br>(44.04-55.94)                                                                                        | 50.83<br>(45.85-56.76) | 55.64<br>(50.33-60.85) | 37.00<br>(34.78-39.53)                                                                               | 43.42<br>(41.12-45.61) | 41.86<br>(38.82-44.88) | 19.98<br>(12.87-40.27)                                                                                                   | 100.00<br>(100.00-100.00) | 100.00<br>(100.00-100.00) |
| Dominica                         | 56.07<br>(51.62-60.17)                                                                                                                             | 56.61<br>(52.03-60.79) | 57.11<br>(52.16-61.56) | 56.11<br>(44.61-67.49)                                                                                        | 56.25<br>(44.55-67.80) | 63.13<br>(51.49-73.89) | 46.77<br>(39.45-49.92)                                                                               | 41.49<br>(38.22-44.52) | 29.13<br>(25.17-38.75) | 100.00<br>(100.00-100.00)                                                                                                | 100.00<br>(100.00-100.00) | 100.00<br>(100.00-100.00) |
| Dominican Republic               | 42.09<br>(36.64-47.79)                                                                                                                             | 44.97<br>(39.75-50.12) | 49.47<br>(43.88-54.39) | 52.01<br>(46.77-57.65)                                                                                        | 42.83<br>(35.81-51.08) | 52.50<br>(45.90-59.27) | 30.08<br>(26.23-32.52)                                                                               | 30.85<br>(28.34-33.05) | 26.23<br>(23.30-31.05) | 100.00<br>(100.00-100.00)                                                                                                | 100.00<br>(100.00-100.00) | 100.00<br>(100.00-100.00) |
| Grenada                          | 58.79<br>(54.23-63.08)                                                                                                                             | 57.50<br>(52.84-61.91) | 56.00<br>(50.57-60.82) | 53.25<br>(39.83-66.89)                                                                                        | 53.31<br>(37.17-67.85) | 60.59<br>(47.72-73.49) | 52.58<br>(42.83-56.01)                                                                               | 39.45<br>(36.41-43.19) | 35.72<br>(32.08-43.46) | 10.31<br>(6.63-21.09)                                                                                                    | 100.00<br>(100.00-100.00) | 100.00<br>(100.00-100.00) |
| Guyana                           | 57.91<br>(54.03-61.57)                                                                                                                             | 58.98<br>(54.91-62.95) | 61.08<br>(56.71-65.34) | 46.07<br>(40.29-52.88)                                                                                        | 46.09<br>(35.54-55.23) | 56.83<br>(45.99-65.48) | 28.65<br>(22.21-31.53)                                                                               | 21.48<br>(19.11-24.10) | 20.84<br>(17.03-25.46) | 10.47<br>(6.73-21.40)                                                                                                    | 21.81<br>(14.07-43.49)    | 100.00<br>(100.00-100.00) |
| Haiti                            | 38.64<br>(32.92-44.21)                                                                                                                             | 42.99<br>(37.35-48.66) | 43.84<br>(38.04-49.11) | 41.92<br>(36.76-49.05)                                                                                        | 41.74<br>(35.43-48.81) | 46.48<br>(39.92-53.15) | 26.94<br>(22.81-35.27)                                                                               | 32.41<br>(28.08-40.41) | 41.73<br>(35.74-47.91) | 100.00<br>(100.00-100.00)                                                                                                | 100.00<br>(100.00-100.00) | 100.00<br>(100.00-100.00) |
| Jamaica                          | 50.41<br>(46.04-54.85)                                                                                                                             | 50.06<br>(45.93-54.38) | 54.31<br>(49.96-58.54) | 52.03<br>(47.04-57.86)                                                                                        | 52.31<br>(47.24-58.49) | 57.05<br>(51.90-62.22) | 39.51<br>(33.64-42.16)                                                                               | 23.62<br>(21.22-29.04) | 17.96<br>(14.13-29.08) | 100.00<br>(100.00-100.00)                                                                                                | 100.00<br>(100.00-100.00) | 100.00<br>(100.00-100.00) |
| Saint Lucia                      | 51.83<br>(47.12-56.13)                                                                                                                             | 53.58<br>(49.02-57.81) | 57.76<br>(53.24-61.86) | 54.55<br>(44.18-64.69)                                                                                        | 54.25<br>(42.18-65.82) | 62.26<br>(51.77-73.29) | 34.52<br>(31.74-37.20)                                                                               | 26.92<br>(24.45-29.39) | 24.71<br>(22.02-27.64) | 12.82<br>(8.24-26.05)                                                                                                    | 100.00<br>(100.00-100.00) | 100.00<br>(100.00-100.00) |
| Saint Vincent and the Grenadines | 63.78<br>(59.16-67.55)                                                                                                                             | 60.59<br>(55.75-64.81) | 61.06<br>(56.06-65.21) | 54.82<br>(40.23-68.56)                                                                                        | 54.67<br>(41.41-68.52) | 62.12<br>(49.05-74.68) | 31.88<br>(28.99-34.94)                                                                               | 28.85<br>(26.45-31.39) | 20.25<br>(17.70-23.30) | 11.15<br>(7.15-22.70)                                                                                                    | 100.00<br>(100.00-100.00) | 100.00<br>(100.00-100.00) |
| Suriname                         | 66.32<br>(62.46-70.21)                                                                                                                             | 68.06<br>(64.30-71.92) | 67.46<br>(62.90-71.82) | 45.03<br>(29.55-56.04)                                                                                        | 44.80<br>(29.26-56.92) | 55.59<br>(42.20-66.83) | 39.21<br>(34.49-42.08)                                                                               | 34.25<br>(31.73-36.93) | 32.22<br>(28.50-36.81) | 13.01<br>(8.37-26.46)                                                                                                    | 100.00<br>(100.00-100.00) | 100.00<br>(100.00-100.00) |

**Appendix Table 1a. Scaled values for each SDG health-related indicator and three summary indicators by country for 1990, 2000, and 2015**

| Location            | Indicator 8.8.1: Age-standardised all-cause disability-adjusted life year (DALY) rates attributable to occupational risks (per 100,000 population) |                        |                        | Indicator 11.6.2: Population-weighted mean levels of fine particulate matter smaller than 2.5 microns (PM2.5) |                        |                        | Indicator 16.1.1: Age-standardised death rate due to interpersonal violence (per 100,000 population) |                        |                        | Indicator 16.1.2: Age-standardised death rate due to collective violence and legal intervention (per 100,000 population) |                           |                           |
|---------------------|----------------------------------------------------------------------------------------------------------------------------------------------------|------------------------|------------------------|---------------------------------------------------------------------------------------------------------------|------------------------|------------------------|------------------------------------------------------------------------------------------------------|------------------------|------------------------|--------------------------------------------------------------------------------------------------------------------------|---------------------------|---------------------------|
|                     | 1990                                                                                                                                               | 2000                   | 2015                   | 1990                                                                                                          | 2000                   | 2015                   | 1990                                                                                                 | 2000                   | 2015                   | 1990                                                                                                                     | 2000                      | 2015                      |
| Trinidad and Tobago | 68.12<br>(65.08-71.24)                                                                                                                             | 72.86<br>(70.08-75.62) | 72.70<br>(68.05-76.55) | 53.68<br>(46.97-60.45)                                                                                        | 53.86<br>(47.18-60.50) | 61.60<br>(54.82-68.09) | 32.53<br>(30.39-34.89)                                                                               | 29.35<br>(27.39-31.64) | 18.72<br>(15.98-21.62) | 5.05<br>(3.62-6.48)                                                                                                      | 100.00<br>(100.00-100.00) | 100.00<br>(100.00-100.00) |
| Brazil              | 39.64<br>(35.50-44.06)                                                                                                                             | 40.27<br>(36.19-44.66) | 47.17<br>(43.42-51.08) | 60.50<br>(54.84-65.50)                                                                                        | 58.29<br>(52.82-63.51) | 66.93<br>(60.76-71.40) | 14.58<br>(12.73-16.04)                                                                               | 12.91<br>(11.86-15.29) | 14.90<br>(13.42-17.48) | 100.00<br>(100.00-100.00)                                                                                                | 48.83<br>(25.03-82.71)    | 100.00<br>(100.00-100.00) |
| Paraguay            | 44.11<br>(39.11-49.24)                                                                                                                             | 43.70<br>(39.01-48.86) | 45.14<br>(40.45-49.95) | 50.04<br>(44.88-56.16)                                                                                        | 49.42<br>(44.20-55.14) | 60.41<br>(54.82-65.89) | 32.20<br>(27.55-35.25)                                                                               | 22.45<br>(20.29-25.73) | 26.50<br>(22.30-30.45) | 100.00<br>(100.00-100.00)                                                                                                | 100.00<br>(100.00-100.00) | 100.00<br>(100.00-100.00) |
| China               | 28.10<br>(22.45-33.92)                                                                                                                             | 34.20<br>(29.55-39.16) | 42.97<br>(38.86-47.37) | 29.73<br>(26.62-37.88)                                                                                        | 28.17<br>(25.16-36.50) | 24.86<br>(22.08-33.64) | 47.14<br>(45.11-49.31)                                                                               | 49.56<br>(47.38-52.51) | 69.09<br>(64.08-71.94) | 100.00<br>(100.00-100.00)                                                                                                | 69.22<br>(52.10-89.16)    | 100.00<br>(100.00-100.00) |
| North Korea         | 37.58<br>(28.70-45.45)                                                                                                                             | 36.96<br>(29.27-44.32) | 37.76<br>(30.35-44.95) | 41.95<br>(37.52-48.74)                                                                                        | 41.73<br>(37.14-49.04) | 39.20<br>(34.70-46.72) | 48.71<br>(42.25-55.23)                                                                               | 50.49<br>(44.36-56.58) | 56.01<br>(49.69-62.68) | 100.00<br>(100.00-100.00)                                                                                                | 100.00<br>(100.00-100.00) | 100.00<br>(100.00-100.00) |
| Taiwan              | 50.57<br>(45.22-55.73)                                                                                                                             | 54.73<br>(49.94-59.33) | 60.97<br>(56.35-65.44) | 45.15<br>(40.71-50.94)                                                                                        | 42.57<br>(38.25-49.48) | 42.13<br>(37.85-48.68) | 39.94<br>(35.51-53.77)                                                                               | 48.07<br>(44.15-59.60) | 66.91<br>(61.97-71.88) | 100.00<br>(100.00-100.00)                                                                                                | 100.00<br>(100.00-100.00) | 100.00<br>(100.00-100.00) |
| Cambodia            | 27.50<br>(21.00-34.19)                                                                                                                             | 27.42<br>(21.02-34.15) | 30.80<br>(23.53-37.41) | 47.48<br>(42.14-54.06)                                                                                        | 47.11<br>(41.60-53.43) | 43.44<br>(37.30-50.57) | 44.77<br>(40.54-49.02)                                                                               | 47.54<br>(43.68-51.13) | 55.63<br>(47.93-62.11) | 4.68<br>(2.98-9.23)                                                                                                      | 100.00<br>(100.00-100.00) | 100.00<br>(100.00-100.00) |
| Indonesia           | 44.72<br>(39.70-49.80)                                                                                                                             | 47.86<br>(42.80-52.40) | 51.26<br>(46.20-56.34) | 57.55<br>(52.20-62.76)                                                                                        | 57.78<br>(52.42-62.70) | 59.48<br>(53.96-64.47) | 79.59<br>(73.04-84.12)                                                                               | 79.07<br>(74.01-83.50) | 75.26<br>(69.27-81.02) | 30.99<br>(24.70-37.17)                                                                                                   | 16.04<br>(12.02-23.33)    | 100.00<br>(100.00-100.00) |
| Laos                | 25.21<br>(17.60-32.47)                                                                                                                             | 26.66<br>(19.69-33.34) | 32.88<br>(26.44-39.22) | 45.60<br>(41.07-52.26)                                                                                        | 45.11<br>(40.58-51.36) | 40.39<br>(35.97-47.54) | 72.83<br>(65.17-80.40)                                                                               | 75.67<br>(70.28-80.76) | 86.50<br>(78.71-93.51) | 3.79<br>(2.00-7.81)                                                                                                      | 100.00<br>(100.00-100.00) | 100.00<br>(100.00-100.00) |
| Malaysia            | 45.66<br>(39.91-51.20)                                                                                                                             | 49.25<br>(42.78-54.90) | 57.33<br>(52.15-62.25) | 59.30<br>(53.69-64.28)                                                                                        | 58.69<br>(53.22-63.85) | 59.24<br>(53.53-64.36) | 61.30<br>(49.82-64.87)                                                                               | 49.23<br>(46.57-52.21) | 48.16<br>(43.79-54.32) | 100.00<br>(100.00-100.00)                                                                                                | 100.00<br>(100.00-100.00) | 100.00<br>(100.00-100.00) |
| Maldives            | 54.80<br>(50.46-59.19)                                                                                                                             | 62.57<br>(58.40-66.49) | 70.89<br>(66.33-74.96) | 43.06<br>(31.34-55.03)                                                                                        | 42.87<br>(31.51-54.36) | 43.89<br>(32.40-55.56) | 67.63<br>(48.39-72.85)                                                                               | 45.87<br>(42.88-53.72) | 51.52<br>(45.64-65.00) | 100.00<br>(100.00-100.00)                                                                                                | 100.00<br>(100.00-100.00) | 100.00<br>(100.00-100.00) |

**Appendix Table 1a. Scaled values for each SDG health-related indicator and three summary indicators by country for 1990, 2000, and 2015**

| Location                       | Indicator 8.8.1: Age-standardised all-cause disability-adjusted life year (DALY) rates attributable to occupational risks (per 100,000 population) |                        |                        | Indicator 11.6.2: Population-weighted mean levels of fine particulate matter smaller than 2.5 microns (PM2.5) |                         |                         | Indicator 16.1.1: Age-standardised death rate due to interpersonal violence (per 100,000 population) |                        |                        | Indicator 16.1.2: Age-standardised death rate due to collective violence and legal intervention (per 100,000 population) |                           |                           |
|--------------------------------|----------------------------------------------------------------------------------------------------------------------------------------------------|------------------------|------------------------|---------------------------------------------------------------------------------------------------------------|-------------------------|-------------------------|------------------------------------------------------------------------------------------------------|------------------------|------------------------|--------------------------------------------------------------------------------------------------------------------------|---------------------------|---------------------------|
|                                | 1990                                                                                                                                               | 2000                   | 2015                   | 1990                                                                                                          | 2000                    | 2015                    | 1990                                                                                                 | 2000                   | 2015                   | 1990                                                                                                                     | 2000                      | 2015                      |
| Mauritius                      | 61.76<br>(58.23-65.11)                                                                                                                             | 67.34<br>(62.89-70.85) | 72.34<br>(66.90-76.60) | 55.96<br>(49.16-62.49)                                                                                        | 55.55<br>(48.54-63.12)  | 60.32<br>(53.41-66.59)  | 60.17<br>(56.99-63.16)                                                                               | 61.31<br>(58.25-64.35) | 57.24<br>(53.68-60.43) | 100.00<br>(100.00-100.00)                                                                                                | 27.50<br>(16.72-48.10)    | 100.00<br>(100.00-100.00) |
| Myanmar                        | 25.22<br>(15.04-34.88)                                                                                                                             | 26.61<br>(17.15-35.80) | 29.51<br>(20.19-38.57) | 32.58<br>(29.32-40.43)                                                                                        | 32.26<br>(28.88-40.36)  | 26.66<br>(23.55-35.44)  | 49.89<br>(42.13-59.29)                                                                               | 56.02<br>(47.04-68.03) | 59.39<br>(49.70-70.41) | 19.45<br>(12.52-39.31)                                                                                                   | 10.05<br>(7.98-12.28)     | 14.25<br>(8.70-27.75)     |
| Philippines                    | 42.29<br>(37.96-46.95)                                                                                                                             | 41.45<br>(37.16-45.99) | 45.39<br>(41.08-49.75) | 47.86<br>(43.27-53.96)                                                                                        | 47.03<br>(42.27-52.82)  | 48.86<br>(44.19-54.88)  | 30.00<br>(27.68-32.35)                                                                               | 20.15<br>(18.45-22.31) | 24.54<br>(21.74-27.33) | 6.12<br>(4.63-7.43)                                                                                                      | 6.02<br>(4.62-6.92)       | 34.76<br>(22.77-60.69)    |
| Sri Lanka                      | 54.28<br>(48.78-59.47)                                                                                                                             | 55.18<br>(50.78-59.45) | 63.66<br>(58.77-68.29) | 42.60<br>(38.26-48.74)                                                                                        | 41.92<br>(37.71-48.79)  | 44.40<br>(39.92-51.60)  | 28.11<br>(25.90-30.65)                                                                               | 32.97<br>(30.71-35.31) | 45.33<br>(39.69-51.44) | 1.40<br>(0.80-1.80)                                                                                                      | 2.32<br>(1.35-3.71)       | 100.00<br>(100.00-100.00) |
| Seychelles                     | 62.66<br>(58.99-66.25)                                                                                                                             | 60.68<br>(57.01-64.30) | 65.13<br>(60.85-69.18) | 54.92<br>(36.01-72.66)                                                                                        | 55.41<br>(35.85-73.25)  | 64.63<br>(46.87-81.40)  | 33.84<br>(30.86-37.99)                                                                               | 32.75<br>(29.90-37.07) | 39.17<br>(35.40-43.48) | 100.00<br>(100.00-100.00)                                                                                                | 100.00<br>(100.00-100.00) | 100.00<br>(100.00-100.00) |
| Thailand                       | 51.25<br>(46.40-56.10)                                                                                                                             | 48.69<br>(44.45-53.19) | 53.82<br>(48.51-59.06) | 48.79<br>(44.24-54.57)                                                                                        | 48.48<br>(43.92-54.33)  | 45.89<br>(41.48-51.98)  | 25.37<br>(23.17-28.03)                                                                               | 24.84<br>(22.51-27.13) | 34.04<br>(28.96-38.18) | 100.00<br>(100.00-100.00)                                                                                                | 100.00<br>(100.00-100.00) | 100.00<br>(100.00-100.00) |
| Timor-Leste                    | 41.74<br>(35.58-47.89)                                                                                                                             | 46.50<br>(40.46-52.39) | 54.62<br>(48.67-60.19) | 53.49<br>(45.92-60.49)                                                                                        | 52.76<br>(45.85-59.97)  | 54.54<br>(47.35-61.72)  | 43.59<br>(35.50-53.52)                                                                               | 50.25<br>(44.84-60.56) | 54.91<br>(48.75-61.58) | 100.00<br>(100.00-100.00)                                                                                                | 0.55<br>(0.20-1.28)       | 100.00<br>(100.00-100.00) |
| Vietnam                        | 44.88<br>(38.02-50.82)                                                                                                                             | 44.83<br>(38.88-51.05) | 44.62<br>(38.40-50.53) | 45.50<br>(41.42-51.66)                                                                                        | 45.17<br>(40.78-51.43)  | 44.09<br>(39.81-50.63)  | 57.84<br>(51.83-63.59)                                                                               | 60.20<br>(54.37-65.83) | 62.76<br>(54.48-70.96) | 100.00<br>(100.00-100.00)                                                                                                | 100.00<br>(100.00-100.00) | 100.00<br>(100.00-100.00) |
| Federated States of Micronesia | 34.92<br>(24.96-44.68)                                                                                                                             | 36.32<br>(26.43-44.20) | 37.86<br>(28.47-45.17) | 73.11<br>(52.98-91.75)                                                                                        | 72.78<br>(53.19-90.31)  | 76.74<br>(58.66-94.74)  | 40.08<br>(31.83-49.79)                                                                               | 40.28<br>(31.98-48.98) | 42.16<br>(32.06-51.30) | 100.00<br>(100.00-100.00)                                                                                                | 100.00<br>(100.00-100.00) | 100.00<br>(100.00-100.00) |
| Fiji                           | 48.92<br>(42.61-54.28)                                                                                                                             | 50.06<br>(44.79-55.19) | 57.19<br>(52.30-61.82) | 73.50<br>(65.49-80.32)                                                                                        | 73.43<br>(62.49-83.31)  | 76.14<br>(65.22-85.83)  | 48.04<br>(43.34-52.76)                                                                               | 39.77<br>(36.50-44.89) | 41.49<br>(37.19-47.47) | 100.00<br>(100.00-100.00)                                                                                                | 100.00<br>(100.00-100.00) | 100.00<br>(100.00-100.00) |
| Kiribati                       | 43.06<br>(37.05-48.70)                                                                                                                             | 43.85<br>(37.49-49.44) | 45.94<br>(40.45-51.32) | 89.14<br>(79.28-97.43)                                                                                        | 89.17<br>(77.18-100.00) | 94.99<br>(83.53-100.00) | 24.96<br>(20.60-44.50)                                                                               | 23.34<br>(18.64-43.45) | 17.38<br>(11.46-45.43) | 100.00<br>(100.00-100.00)                                                                                                | 100.00<br>(100.00-100.00) | 100.00<br>(100.00-100.00) |

**Appendix Table 1a. Scaled values for each SDG health-related indicator and three summary indicators by country for 1990, 2000, and 2015**

| Location         | Indicator 8.8.1: Age-standardised all-cause disability-adjusted life year (DALY) rates attributable to occupational risks (per 100,000 population) |                        |                        | Indicator 11.6.2: Population-weighted mean levels of fine particulate matter smaller than 2.5 microns (PM2.5) |                         |                         | Indicator 16.1.1: Age-standardised death rate due to interpersonal violence (per 100,000 population) |                        |                        | Indicator 16.1.2: Age-standardised death rate due to collective violence and legal intervention (per 100,000 population) |                           |                           |
|------------------|----------------------------------------------------------------------------------------------------------------------------------------------------|------------------------|------------------------|---------------------------------------------------------------------------------------------------------------|-------------------------|-------------------------|------------------------------------------------------------------------------------------------------|------------------------|------------------------|--------------------------------------------------------------------------------------------------------------------------|---------------------------|---------------------------|
|                  | 1990                                                                                                                                               | 2000                   | 2015                   | 1990                                                                                                          | 2000                    | 2015                    | 1990                                                                                                 | 2000                   | 2015                   | 1990                                                                                                                     | 2000                      | 2015                      |
| Marshall Islands | 43.20<br>(37.02-49.00)                                                                                                                             | 43.33<br>(37.71-48.57) | 44.21<br>(38.76-49.72) | 69.60<br>(35.61-100.00)                                                                                       | 69.15<br>(35.12-100.00) | 71.20<br>(36.31-100.00) | 37.88<br>(33.60-43.77)                                                                               | 41.63<br>(37.14-47.17) | 42.99<br>(37.77-49.23) | 100.00<br>(100.00-100.00)                                                                                                | 100.00<br>(100.00-100.00) | 100.00<br>(100.00-100.00) |
| Papua New Guinea | 1.32<br>(0.00-8.94)                                                                                                                                | 5.53<br>(0.00-13.20)   | 8.57<br>(0.00-18.43)   | 60.03<br>(54.55-64.80)                                                                                        | 58.87<br>(52.33-64.33)  | 62.12<br>(55.75-67.36)  | 33.58<br>(25.93-41.86)                                                                               | 34.41<br>(26.29-43.47) | 36.37<br>(27.32-45.43) | 7.97<br>(6.32-9.15)                                                                                                      | 100.00<br>(100.00-100.00) | 100.00<br>(100.00-100.00) |
| Samoa            | 48.70<br>(42.62-54.58)                                                                                                                             | 52.64<br>(46.90-58.07) | 57.33<br>(52.00-62.42) | 89.44<br>(80.06-95.98)                                                                                        | 89.28<br>(80.41-95.75)  | 92.45<br>(82.68-99.32)  | 43.23<br>(36.55-49.82)                                                                               | 43.95<br>(36.74-51.61) | 47.97<br>(40.77-54.79) | 100.00<br>(100.00-100.00)                                                                                                | 100.00<br>(100.00-100.00) | 100.00<br>(100.00-100.00) |
| Solomon Islands  | 27.04<br>(16.97-36.67)                                                                                                                             | 30.54<br>(20.09-39.92) | 32.51<br>(22.53-41.06) | 77.82<br>(68.15-85.04)                                                                                        | 78.17<br>(66.35-86.75)  | 80.30<br>(67.95-88.41)  | 35.82<br>(28.04-45.13)                                                                               | 36.79<br>(28.37-46.29) | 38.51<br>(29.53-48.26) | 100.00<br>(100.00-100.00)                                                                                                | 100.00<br>(100.00-100.00) | 100.00<br>(100.00-100.00) |
| Tonga            | 42.11<br>(36.10-47.70)                                                                                                                             | 42.26<br>(37.65-47.04) | 42.09<br>(36.78-47.16) | 86.69<br>(77.40-93.62)                                                                                        | 86.75<br>(77.44-94.13)  | 91.26<br>(81.35-98.86)  | 31.76<br>(27.23-38.14)                                                                               | 51.47<br>(39.00-55.51) | 57.21<br>(40.44-63.67) | 100.00<br>(100.00-100.00)                                                                                                | 100.00<br>(100.00-100.00) | 100.00<br>(100.00-100.00) |
| Vanuatu          | 18.12<br>(5.67-28.14)                                                                                                                              | 25.14<br>(14.69-35.32) | 31.38<br>(21.79-39.56) | 69.54<br>(61.27-76.40)                                                                                        | 69.73<br>(55.56-79.50)  | 74.71<br>(57.44-85.96)  | 67.54<br>(58.46-76.31)                                                                               | 67.50<br>(57.93-79.41) | 69.61<br>(59.03-80.44) | 100.00<br>(100.00-100.00)                                                                                                | 100.00<br>(100.00-100.00) | 100.00<br>(100.00-100.00) |
| Afghanistan      | 42.07<br>(33.20-49.88)                                                                                                                             | 40.90<br>(32.97-49.03) | 42.89<br>(35.39-50.10) | 23.55<br>(20.77-32.46)                                                                                        | 25.84<br>(22.91-34.52)  | 30.05<br>(26.80-38.06)  | 9.34<br>(2.94-16.06)                                                                                 | 8.86<br>(3.46-15.14)   | 11.38<br>(5.51-18.22)  | 2.19<br>(1.32-3.27)                                                                                                      | 1.31<br>(0.75-1.67)       | 0.55<br>(0.28-1.04)       |
| Algeria          | 67.02<br>(61.84-72.12)                                                                                                                             | 72.57<br>(67.27-77.85) | 77.98<br>(72.25-83.32) | 39.22<br>(35.18-46.56)                                                                                        | 40.57<br>(36.49-47.91)  | 38.07<br>(34.08-45.10)  | 69.26<br>(64.88-73.74)                                                                               | 70.65<br>(66.66-74.96) | 78.88<br>(73.89-83.93) | 100.00<br>(100.00-100.00)                                                                                                | 4.56<br>(3.35-5.39)       | 22.93<br>(16.10-38.24)    |
| Bahrain          | 47.77<br>(41.19-54.01)                                                                                                                             | 52.50<br>(47.18-57.71) | 63.44<br>(58.26-68.52) | 22.93<br>(16.53-32.22)                                                                                        | 23.01<br>(16.12-32.50)  | 26.28<br>(19.55-35.22)  | 60.34<br>(51.18-64.52)                                                                               | 54.47<br>(50.94-57.78) | 60.37<br>(55.10-65.32) | 100.00<br>(100.00-100.00)                                                                                                | 29.98<br>(18.77-62.94)    | 100.00<br>(100.00-100.00) |
| Egypt            | 56.95<br>(51.21-61.87)                                                                                                                             | 64.91<br>(61.18-68.72) | 66.09<br>(60.81-70.71) | 17.51<br>(14.38-27.79)                                                                                        | 18.45<br>(15.03-28.00)  | 8.37<br>(4.95-19.69)    | 81.12<br>(64.66-85.24)                                                                               | 55.41<br>(51.60-69.32) | 52.86<br>(48.34-71.88) | 100.00<br>(100.00-100.00)                                                                                                | 17.83<br>(12.31-29.99)    | 5.75<br>(3.79-9.57)       |
| Iran             | 61.88<br>(56.64-66.72)                                                                                                                             | 64.35<br>(59.17-69.11) | 68.32<br>(63.33-73.02) | 29.25<br>(26.16-37.51)                                                                                        | 30.04<br>(26.83-38.28)  | 33.02<br>(29.60-40.88)  | 45.29<br>(40.82-50.48)                                                                               | 46.98<br>(43.59-50.98) | 56.69<br>(50.79-62.51) | 100.00<br>(100.00-100.00)                                                                                                | 10.08<br>(6.90-16.99)     | 100.00<br>(100.00-100.00) |

**Appendix Table 1a. Scaled values for each SDG health-related indicator and three summary indicators by country for 1990, 2000, and 2015**

| Location     | Indicator 8.8.1: Age-standardised all-cause disability-adjusted life year (DALY) rates attributable to occupational risks (per 100,000 population) |                        |                        | Indicator 11.6.2: Population-weighted mean levels of fine particulate matter smaller than 2.5 microns (PM2.5) |                        |                        | Indicator 16.1.1: Age-standardised death rate due to interpersonal violence (per 100,000 population) |                         |                        | Indicator 16.1.2: Age-standardised death rate due to collective violence and legal intervention (per 100,000 population) |                           |                           |
|--------------|----------------------------------------------------------------------------------------------------------------------------------------------------|------------------------|------------------------|---------------------------------------------------------------------------------------------------------------|------------------------|------------------------|------------------------------------------------------------------------------------------------------|-------------------------|------------------------|--------------------------------------------------------------------------------------------------------------------------|---------------------------|---------------------------|
|              | 1990                                                                                                                                               | 2000                   | 2015                   | 1990                                                                                                          | 2000                   | 2015                   | 1990                                                                                                 | 2000                    | 2015                   | 1990                                                                                                                     | 2000                      | 2015                      |
| Iraq         | 64.56<br>(57.86-70.71)                                                                                                                             | 63.25<br>(57.04-69.42) | 65.17<br>(58.99-71.00) | 28.16<br>(24.65-36.89)                                                                                        | 28.45<br>(25.07-36.47) | 27.89<br>(24.54-36.28) | 36.39<br>(31.71-41.76)                                                                               | 31.14<br>(26.37-36.76)  | 22.36<br>(16.37-36.57) | 4.46<br>(2.82-8.81)                                                                                                      | 12.91<br>(10.58-15.02)    | 0.86<br>(0.47-1.55)       |
| Jordan       | 73.46<br>(67.13-79.25)                                                                                                                             | 75.84<br>(69.74-81.31) | 78.85<br>(73.40-84.02) | 41.04<br>(36.95-47.82)                                                                                        | 42.76<br>(38.43-49.08) | 35.77<br>(31.83-43.70) | 48.06<br>(42.33-52.67)                                                                               | 46.40<br>(42.69-51.14)  | 50.79<br>(46.56-58.06) | 100.00<br>(100.00-100.00)                                                                                                | 100.00<br>(100.00-100.00) | 100.00<br>(100.00-100.00) |
| Kuwait       | 66.31<br>(60.49-71.65)                                                                                                                             | 67.66<br>(61.08-73.13) | 73.58<br>(67.15-79.54) | 22.15<br>(17.22-31.41)                                                                                        | 21.45<br>(16.81-31.44) | 20.82<br>(15.64-30.70) | 70.36<br>(65.54-73.98)                                                                               | 66.74<br>(63.65-69.81)  | 80.23<br>(74.23-85.79) | 1.41<br>(0.83-2.69)                                                                                                      | 18.45<br>(13.47-28.65)    | 13.57<br>(9.29-22.90)     |
| Lebanon      | 66.25<br>(59.06-72.37)                                                                                                                             | 70.95<br>(64.75-76.79) | 70.73<br>(63.81-77.33) | 47.53<br>(42.90-53.84)                                                                                        | 47.66<br>(42.97-53.75) | 40.40<br>(35.71-47.05) | 36.26<br>(30.34-50.59)                                                                               | 54.84<br>(49.28-61.35)  | 68.33<br>(60.43-76.48) | 0.77<br>(0.42-1.00)                                                                                                      | 11.59<br>(7.94-19.71)     | 7.50<br>(5.04-12.82)      |
| Libya        | 53.45<br>(48.24-58.83)                                                                                                                             | 52.50<br>(46.81-57.66) | 53.96<br>(47.59-60.26) | 25.56<br>(21.92-33.91)                                                                                        | 26.78<br>(23.05-35.36) | 16.29<br>(12.74-26.50) | 62.30<br>(56.45-68.84)                                                                               | 63.06<br>(58.35-68.89)  | 64.20<br>(58.28-70.62) | 100.00<br>(100.00-100.00)                                                                                                | 6.11<br>(4.04-10.21)      | 1.13<br>(0.64-1.99)       |
| Morocco      | 44.63<br>(38.28-50.88)                                                                                                                             | 47.88<br>(41.23-54.36) | 52.08<br>(45.21-58.40) | 50.17<br>(45.50-55.90)                                                                                        | 50.85<br>(46.05-56.69) | 49.40<br>(44.78-55.17) | 83.79<br>(63.78-89.72)                                                                               | 68.07<br>(62.70-73.09)  | 57.01<br>(49.54-72.18) | 16.07<br>(11.10-26.92)                                                                                                   | 100.00<br>(100.00-100.00) | 100.00<br>(100.00-100.00) |
| Palestine    | 66.92<br>(60.52-72.72)                                                                                                                             | 69.07<br>(63.64-74.04) | 68.63<br>(62.47-74.89) | 56.32<br>(50.75-62.14)                                                                                        | 56.98<br>(51.41-62.32) | 52.20<br>(47.22-57.68) | 57.15<br>(47.23-64.06)                                                                               | 55.09<br>(50.55-58.74)  | 41.74<br>(35.27-51.03) | 2.57<br>(1.57-4.44)                                                                                                      | 1.81<br>(1.06-3.07)       | 100.00<br>(100.00-100.00) |
| Oman         | 78.98<br>(71.58-85.15)                                                                                                                             | 78.93<br>(71.37-85.39) | 73.02<br>(67.15-78.45) | 21.51<br>(17.23-31.56)                                                                                        | 21.32<br>(16.75-31.10) | 27.26<br>(22.98-35.81) | 85.52<br>(75.42-94.07)                                                                               | 86.99<br>(79.02-92.25)  | 75.20<br>(69.27-81.97) | 100.00<br>(100.00-100.00)                                                                                                | 100.00<br>(100.00-100.00) | 100.00<br>(100.00-100.00) |
| Qatar        | 53.83<br>(47.71-59.69)                                                                                                                             | 50.32<br>(44.06-56.49) | 53.30<br>(46.11-59.99) | 7.54<br>(3.07-18.70)                                                                                          | 8.17<br>(2.59-20.31)   | 7.70<br>(2.78-19.63)   | 81.46<br>(70.56-87.85)                                                                               | 83.04<br>(72.00-87.98)  | 76.65<br>(70.40-83.25) | 100.00<br>(100.00-100.00)                                                                                                | 100.00<br>(100.00-100.00) | 100.00<br>(100.00-100.00) |
| Saudi Arabia | 77.09<br>(73.59-80.67)                                                                                                                             | 78.96<br>(75.55-82.29) | 83.37<br>(80.27-86.90) | 14.25<br>(11.97-24.41)                                                                                        | 11.76<br>(9.51-22.42)  | 7.95<br>(5.73-18.93)   | 96.65<br>(83.93-100.00)                                                                              | 98.56<br>(85.66-100.00) | 86.37<br>(82.85-91.42) | 100.00<br>(100.00-100.00)                                                                                                | 100.00<br>(100.00-100.00) | 54.24<br>(13.20-100.00)   |
| Sudan        | 45.20<br>(37.48-52.35)                                                                                                                             | 48.36<br>(40.72-55.23) | 50.72<br>(43.82-57.41) | 25.22<br>(21.92-34.23)                                                                                        | 25.32<br>(22.21-33.86) | 28.93<br>(25.41-37.04) | 88.79<br>(81.71-95.27)                                                                               | 85.12<br>(77.27-92.52)  | 64.92<br>(54.59-90.21) | 1.60<br>(0.83-2.68)                                                                                                      | 2.31<br>(1.33-3.97)       | 5.31<br>(2.99-8.80)       |

**Appendix Table 1a. Scaled values for each SDG health-related indicator and three summary indicators by country for 1990, 2000, and 2015**

| Location             | Indicator 8.8.1: Age-standardised all-cause disability-adjusted life year (DALY) rates attributable to occupational risks (per 100,000 population) |                        |                        | Indicator 11.6.2: Population-weighted mean levels of fine particulate matter smaller than 2.5 microns (PM2.5) |                        |                        | Indicator 16.1.1: Age-standardised death rate due to interpersonal violence (per 100,000 population) |                        |                        | Indicator 16.1.2: Age-standardised death rate due to collective violence and legal intervention (per 100,000 population) |                           |                           |
|----------------------|----------------------------------------------------------------------------------------------------------------------------------------------------|------------------------|------------------------|---------------------------------------------------------------------------------------------------------------|------------------------|------------------------|------------------------------------------------------------------------------------------------------|------------------------|------------------------|--------------------------------------------------------------------------------------------------------------------------|---------------------------|---------------------------|
|                      | 1990                                                                                                                                               | 2000                   | 2015                   | 1990                                                                                                          | 2000                   | 2015                   | 1990                                                                                                 | 2000                   | 2015                   | 1990                                                                                                                     | 2000                      | 2015                      |
| Syria                | 56.67<br>(50.10-62.25)                                                                                                                             | 62.34<br>(56.08-68.18) | 72.74<br>(67.19-78.03) | 39.21<br>(35.31-45.99)                                                                                        | 40.57<br>(35.64-47.59) | 33.96<br>(28.79-42.06) | 65.85<br>(60.77-70.98)                                                                               | 66.60<br>(61.67-72.50) | 60.85<br>(55.76-74.58) | 100.00<br>(100.00-100.00)                                                                                                | 100.00<br>(100.00-100.00) | 0.26<br>(0.10-0.55)       |
| Tunisia              | 44.39<br>(38.28-50.04)                                                                                                                             | 47.05<br>(41.91-52.01) | 49.11<br>(41.94-56.59) | 36.43<br>(32.83-43.79)                                                                                        | 38.02<br>(34.10-45.36) | 31.92<br>(28.67-39.59) | 72.62<br>(67.69-77.21)                                                                               | 73.43<br>(68.85-77.97) | 64.67<br>(58.21-76.39) | 100.00<br>(100.00-100.00)                                                                                                | 100.00<br>(100.00-100.00) | 9.50<br>(6.49-16.10)      |
| Turkey               | 26.98<br>(18.04-34.73)                                                                                                                             | 33.58<br>(27.77-39.49) | 51.23<br>(45.75-56.64) | 40.19<br>(36.18-46.95)                                                                                        | 42.35<br>(38.40-49.00) | 37.44<br>(33.72-44.47) | 52.55<br>(48.08-57.60)                                                                               | 58.59<br>(54.97-62.39) | 58.09<br>(54.12-68.96) | 13.14<br>(10.79-15.33)                                                                                                   | 19.97<br>(16.25-23.57)    | 19.37<br>(13.47-32.23)    |
| United Arab Emirates | 42.20<br>(35.50-49.45)                                                                                                                             | 45.83<br>(39.84-51.82) | 43.06<br>(35.90-49.76) | 17.57<br>(14.90-27.28)                                                                                        | 17.58<br>(14.82-27.08) | 22.07<br>(19.07-31.29) | 65.56<br>(58.13-73.53)                                                                               | 72.93<br>(68.21-78.30) | 76.32<br>(68.69-84.55) | 100.00<br>(100.00-100.00)                                                                                                | 100.00<br>(100.00-100.00) | 100.00<br>(100.00-100.00) |
| Yemen                | 50.42<br>(41.88-58.11)                                                                                                                             | 50.69<br>(42.03-57.47) | 53.83<br>(45.42-60.71) | 26.99<br>(22.38-35.86)                                                                                        | 26.56<br>(21.18-35.46) | 27.54<br>(21.94-36.17) | 43.52<br>(34.08-54.06)                                                                               | 44.03<br>(34.14-54.28) | 45.00<br>(34.19-56.27) | 100.00<br>(100.00-100.00)                                                                                                | 100.00<br>(100.00-100.00) | 1.02<br>(0.57-1.39)       |
| Bangladesh           | 12.99<br>(5.43-20.98)                                                                                                                              | 7.91<br>(0.00-18.72)   | 22.72<br>(8.77-32.13)  | 22.24<br>(19.45-31.29)                                                                                        | 21.59<br>(18.87-30.69) | 12.85<br>(10.42-23.44) | 51.71<br>(39.55-55.44)                                                                               | 49.71<br>(45.39-53.13) | 55.05<br>(50.15-59.73) | 100.00<br>(100.00-100.00)                                                                                                | 100.00<br>(100.00-100.00) | 100.00<br>(100.00-100.00) |
| Bhutan               | 20.41<br>(11.83-28.64)                                                                                                                             | 22.10<br>(12.96-30.32) | 27.10<br>(18.20-35.02) | 34.67<br>(31.10-42.25)                                                                                        | 34.29<br>(30.56-41.32) | 26.01<br>(22.66-34.22) | 60.60<br>(54.25-67.92)                                                                               | 63.87<br>(58.54-71.08) | 73.44<br>(66.36-80.52) | 100.00<br>(100.00-100.00)                                                                                                | 100.00<br>(100.00-100.00) | 100.00<br>(100.00-100.00) |
| India                | 21.42<br>(15.64-27.78)                                                                                                                             | 24.64<br>(19.28-30.81) | 33.83<br>(28.76-39.19) | 24.03<br>(21.24-32.99)                                                                                        | 23.29<br>(20.54-32.23) | 18.04<br>(15.63-27.86) | 46.24<br>(43.84-51.04)                                                                               | 46.95<br>(44.49-53.23) | 50.06<br>(46.32-58.15) | 14.12<br>(7.69-24.08)                                                                                                    | 17.83<br>(10.29-29.88)    | 93.13<br>(69.67-100.00)   |
| Nepal                | 11.85<br>(2.65-20.66)                                                                                                                              | 13.88<br>(4.82-22.77)  | 16.79<br>(7.99-25.32)  | 25.75<br>(22.77-34.46)                                                                                        | 25.74<br>(22.69-34.39) | 17.80<br>(14.62-27.72) | 67.04<br>(60.98-72.05)                                                                               | 58.60<br>(54.27-68.11) | 60.09<br>(53.30-72.25) | 100.00<br>(100.00-100.00)                                                                                                | 7.30<br>(5.71-8.34)       | 100.00<br>(100.00-100.00) |
| Pakistan             | 39.45<br>(31.28-46.46)                                                                                                                             | 38.01<br>(29.83-44.91) | 38.58<br>(27.06-46.10) | 20.53<br>(17.94-29.75)                                                                                        | 19.88<br>(17.25-29.14) | 21.79<br>(19.05-31.05) | 48.32<br>(43.49-53.14)                                                                               | 43.19<br>(39.27-50.97) | 44.63<br>(39.36-55.62) | 16.51<br>(12.56-22.71)                                                                                                   | 100.00<br>(100.00-100.00) | 6.16<br>(4.39-8.23)       |
| Botswana             | 35.22<br>(14.20-49.74)                                                                                                                             | 34.91<br>(5.73-53.63)  | 42.00<br>(14.90-56.52) | 50.79<br>(45.97-57.08)                                                                                        | 50.12<br>(45.14-56.01) | 56.27<br>(50.69-61.82) | 71.47<br>(48.53-91.13)                                                                               | 34.75<br>(7.58-62.81)  | 31.97<br>(5.55-61.84)  | 100.00<br>(100.00-100.00)                                                                                                | 100.00<br>(100.00-100.00) | 100.00<br>(100.00-100.00) |

**Appendix Table 1a. Scaled values for each SDG health-related indicator and three summary indicators by country for 1990, 2000, and 2015**

| Location      | Indicator 8.8.1: Age-standardised all-cause disability-adjusted life year (DALY) rates attributable to occupational risks (per 100,000 population) |                        |                        | Indicator 11.6.2: Population-weighted mean levels of fine particulate matter smaller than 2.5 microns (PM2.5) |                        |                        | Indicator 16.1.1: Age-standardised death rate due to interpersonal violence (per 100,000 population) |                        |                        | Indicator 16.1.2: Age-standardised death rate due to collective violence and legal intervention (per 100,000 population) |                           |                           |
|---------------|----------------------------------------------------------------------------------------------------------------------------------------------------|------------------------|------------------------|---------------------------------------------------------------------------------------------------------------|------------------------|------------------------|------------------------------------------------------------------------------------------------------|------------------------|------------------------|--------------------------------------------------------------------------------------------------------------------------|---------------------------|---------------------------|
|               | 1990                                                                                                                                               | 2000                   | 2015                   | 1990                                                                                                          | 2000                   | 2015                   | 1990                                                                                                 | 2000                   | 2015                   | 1990                                                                                                                     | 2000                      | 2015                      |
| Lesotho       | 22.91<br>(9.97-33.89)                                                                                                                              | 22.62<br>(9.38-33.39)  | 19.36<br>(4.70-33.49)  | 47.09<br>(42.11-53.44)                                                                                        | 44.66<br>(36.58-52.29) | 47.76<br>(39.10-55.51) | 21.57<br>(15.25-28.93)                                                                               | 13.03<br>(5.86-22.46)  | 10.79<br>(0.00-24.27)  | 100.00<br>(100.00-100.00)                                                                                                | 100.00<br>(100.00-100.00) | 100.00<br>(100.00-100.00) |
| Namibia       | 48.50<br>(39.09-56.04)                                                                                                                             | 46.03<br>(36.92-53.55) | 57.65<br>(48.26-65.78) | 46.17<br>(40.82-52.48)                                                                                        | 45.11<br>(39.06-52.18) | 51.29<br>(44.04-57.70) | 27.88<br>(21.19-34.31)                                                                               | 23.41<br>(17.62-29.89) | 32.65<br>(20.79-45.00) | 100.00<br>(100.00-100.00)                                                                                                | 5.57<br>(3.07-10.18)      | 100.00<br>(100.00-100.00) |
| South Africa  | 56.76<br>(51.54-61.53)                                                                                                                             | 55.23<br>(50.50-60.00) | 64.11<br>(59.73-68.26) | 38.57<br>(34.75-45.83)                                                                                        | 36.99<br>(33.37-44.35) | 42.86<br>(38.73-49.60) | 4.93<br>(1.85-8.43)                                                                                  | 3.77<br>(1.94-6.80)    | 10.35<br>(8.00-12.92)  | 4.48<br>(3.06-5.65)                                                                                                      | 100.00<br>(100.00-100.00) | 21.62<br>(15.65-29.34)    |
| Swaziland     | 42.34<br>(31.69-51.39)                                                                                                                             | 42.70<br>(31.21-53.41) | 45.23<br>(28.99-60.25) | 45.99<br>(40.94-51.94)                                                                                        | 44.72<br>(38.83-51.97) | 51.09<br>(44.75-57.86) | 15.00<br>(8.48-23.08)                                                                                | 22.88<br>(14.51-32.98) | 24.07<br>(9.58-41.38)  | 100.00<br>(100.00-100.00)                                                                                                | 100.00<br>(100.00-100.00) | 100.00<br>(100.00-100.00) |
| Zimbabwe      | 40.99<br>(34.03-48.35)                                                                                                                             | 41.83<br>(30.91-51.33) | 39.60<br>(27.32-49.40) | 45.85<br>(40.71-52.34)                                                                                        | 47.03<br>(41.77-53.06) | 49.57<br>(44.10-55.62) | 40.37<br>(33.45-48.59)                                                                               | 42.28<br>(31.75-52.44) | 41.43<br>(31.64-53.43) | 23.19<br>(14.73-39.08)                                                                                                   | 30.35<br>(19.35-47.92)    | 100.00<br>(100.00-100.00) |
| Benin         | 35.62<br>(29.77-42.36)                                                                                                                             | 36.84<br>(30.69-43.29) | 37.00<br>(29.35-44.97) | 23.26<br>(19.09-32.74)                                                                                        | 24.46<br>(20.23-33.11) | 38.39<br>(34.09-45.72) | 58.40<br>(51.33-64.66)                                                                               | 52.72<br>(46.21-59.29) | 49.77<br>(36.92-63.29) | 100.00<br>(100.00-100.00)                                                                                                | 100.00<br>(100.00-100.00) | 100.00<br>(100.00-100.00) |
| Burkina Faso  | 24.40<br>(18.37-30.77)                                                                                                                             | 26.29<br>(19.94-33.69) | 29.92<br>(21.97-38.49) | 20.72<br>(17.47-29.94)                                                                                        | 21.10<br>(17.71-30.34) | 34.94<br>(30.41-42.49) | 78.21<br>(61.02-84.72)                                                                               | 77.79<br>(62.28-83.99) | 79.98<br>(65.57-91.66) | 100.00<br>(100.00-100.00)                                                                                                | 100.00<br>(100.00-100.00) | 100.00<br>(100.00-100.00) |
| Cameroon      | 36.88<br>(30.80-42.75)                                                                                                                             | 37.97<br>(32.09-43.71) | 39.92<br>(32.02-47.28) | 8.08<br>(5.84-19.21)                                                                                          | 9.78<br>(7.33-20.84)   | 21.17<br>(18.29-30.39) | 50.42<br>(42.41-58.18)                                                                               | 48.35<br>(42.07-55.93) | 52.66<br>(40.18-65.05) | 100.00<br>(100.00-100.00)                                                                                                | 100.00<br>(100.00-100.00) | 3.98<br>(2.34-7.24)       |
| Cape Verde    | 43.75<br>(38.44-49.26)                                                                                                                             | 49.43<br>(42.87-56.08) | 54.70<br>(49.44-59.81) | 27.78<br>(19.95-36.61)                                                                                        | 29.86<br>(21.52-39.13) | 35.51<br>(26.06-44.88) | 53.17<br>(30.61-57.87)                                                                               | 24.12<br>(17.07-32.35) | 25.64<br>(20.02-32.14) | 100.00<br>(100.00-100.00)                                                                                                | 100.00<br>(100.00-100.00) | 100.00<br>(100.00-100.00) |
| Chad          | 30.33<br>(23.79-37.15)                                                                                                                             | 30.50<br>(23.84-37.44) | 32.82<br>(25.28-40.97) | 21.85<br>(19.07-31.12)                                                                                        | 22.28<br>(18.46-31.12) | 31.19<br>(27.15-39.19) | 54.65<br>(44.81-63.34)                                                                               | 47.05<br>(39.94-54.80) | 47.63<br>(34.53-59.93) | 1.57<br>(0.86-2.80)                                                                                                      | 2.18<br>(1.08-3.64)       | 5.83<br>(3.63-11.08)      |
| Cote d'Ivoire | 34.85<br>(28.72-40.92)                                                                                                                             | 36.63<br>(30.32-42.96) | 38.95<br>(31.70-45.62) | 39.58<br>(35.07-46.23)                                                                                        | 40.63<br>(36.17-47.40) | 48.83<br>(43.50-55.21) | 82.72<br>(36.28-92.65)                                                                               | 79.32<br>(34.83-89.15) | 80.78<br>(39.07-97.70) | 100.00<br>(100.00-100.00)                                                                                                | 11.26<br>(6.91-18.69)     | 100.00<br>(100.00-100.00) |

**Appendix Table 1a. Scaled values for each SDG health-related indicator and three summary indicators by country for 1990, 2000, and 2015**

| Location              | Indicator 8.8.1: Age-standardised all-cause disability-adjusted life year (DALY) rates attributable to occupational risks (per 100,000 population) |                        |                        | Indicator 11.6.2: Population-weighted mean levels of fine particulate matter smaller than 2.5 microns (PM2.5) |                        |                        | Indicator 16.1.1: Age-standardised death rate due to interpersonal violence (per 100,000 population) |                        |                        | Indicator 16.1.2: Age-standardised death rate due to collective violence and legal intervention (per 100,000 population) |                           |                           |
|-----------------------|----------------------------------------------------------------------------------------------------------------------------------------------------|------------------------|------------------------|---------------------------------------------------------------------------------------------------------------|------------------------|------------------------|------------------------------------------------------------------------------------------------------|------------------------|------------------------|--------------------------------------------------------------------------------------------------------------------------|---------------------------|---------------------------|
|                       | 1990                                                                                                                                               | 2000                   | 2015                   | 1990                                                                                                          | 2000                   | 2015                   | 1990                                                                                                 | 2000                   | 2015                   | 1990                                                                                                                     | 2000                      | 2015                      |
| The Gambia            | 31.06<br>(23.57-38.83)                                                                                                                             | 35.54<br>(29.11-41.99) | 40.36<br>(33.39-47.54) | 22.48<br>(0.43-34.91)                                                                                         | 21.51<br>(0.00-35.39)  | 25.24<br>(2.45-41.01)  | 83.25<br>(41.06-96.58)                                                                               | 79.15<br>(40.84-88.75) | 83.65<br>(40.38-95.62) | 100.00<br>(100.00-100.00)                                                                                                | 9.97<br>(6.18-17.17)      | 100.00<br>(100.00-100.00) |
| Ghana                 | 44.27<br>(38.51-50.15)                                                                                                                             | 46.29<br>(40.85-52.11) | 49.78<br>(43.64-55.84) | 36.13<br>(32.56-43.57)                                                                                        | 37.38<br>(33.39-44.73) | 49.41<br>(44.47-55.50) | 52.44<br>(28.27-62.56)                                                                               | 50.91<br>(30.15-58.79) | 54.19<br>(31.96-67.41) | 100.00<br>(100.00-100.00)                                                                                                | 26.64<br>(16.97-45.19)    | 100.00<br>(100.00-100.00) |
| Guinea                | 34.03<br>(27.70-40.22)                                                                                                                             | 35.49<br>(29.19-41.86) | 34.77<br>(27.54-41.72) | 42.10<br>(37.86-49.12)                                                                                        | 42.05<br>(37.10-49.06) | 49.83<br>(44.63-55.55) | 57.64<br>(49.71-63.72)                                                                               | 52.63<br>(46.87-57.68) | 49.47<br>(38.95-60.04) | 100.00<br>(100.00-100.00)                                                                                                | 5.56<br>(3.41-9.80)       | 32.54<br>(21.17-53.40)    |
| Guinea-Bissau         | 32.32<br>(17.40-42.67)                                                                                                                             | 34.98<br>(22.37-44.82) | 35.18<br>(19.34-45.71) | 33.74<br>(24.57-42.06)                                                                                        | 33.99<br>(24.57-42.17) | 40.43<br>(28.30-49.69) | 41.34<br>(23.76-57.01)                                                                               | 39.44<br>(20.71-55.26) | 38.26<br>(16.14-53.08) | 100.00<br>(100.00-100.00)                                                                                                | 100.00<br>(100.00-100.00) | 100.00<br>(100.00-100.00) |
| Liberia               | 43.31<br>(37.36-49.38)                                                                                                                             | 43.56<br>(37.37-49.37) | 44.77<br>(38.34-50.89) | 68.92<br>(62.39-73.57)                                                                                        | 68.81<br>(61.80-73.85) | 75.82<br>(68.47-81.25) | 52.92<br>(45.54-60.64)                                                                               | 56.26<br>(49.90-63.53) | 57.71<br>(47.78-66.92) | 0.38<br>(0.12-0.73)                                                                                                      | 4.89<br>(3.02-8.76)       | 100.00<br>(100.00-100.00) |
| Mali                  | 44.52<br>(39.34-49.80)                                                                                                                             | 47.58<br>(42.31-52.54) | 48.98<br>(42.74-54.70) | 22.97<br>(20.03-32.19)                                                                                        | 24.03<br>(20.24-32.94) | 32.42<br>(28.10-40.23) | 54.47<br>(45.25-59.75)                                                                               | 55.25<br>(48.50-61.00) | 54.55<br>(43.87-63.99) | 4.44<br>(2.63-7.30)                                                                                                      | 1.88<br>(1.09-3.44)       | 6.83<br>(4.12-11.86)      |
| Mauritania            | 47.38<br>(42.05-52.64)                                                                                                                             | 50.47<br>(45.08-56.26) | 51.74<br>(45.85-57.28) | 10.67<br>(4.78-21.79)                                                                                         | 11.47<br>(0.52-23.00)  | 14.70<br>(1.71-26.06)  | 54.95<br>(46.49-61.20)                                                                               | 56.39<br>(48.04-66.99) | 57.14<br>(43.11-71.16) | 2.17<br>(1.28-3.99)                                                                                                      | 100.00<br>(100.00-100.00) | 100.00<br>(100.00-100.00) |
| Niger                 | 40.56<br>(34.69-46.48)                                                                                                                             | 41.39<br>(35.53-47.14) | 39.53<br>(32.69-46.21) | 1.68<br>(0.00-13.85)                                                                                          | 2.43<br>(0.00-14.35)   | 22.75<br>(19.45-32.25) | 54.05<br>(44.22-61.62)                                                                               | 53.45<br>(45.96-60.50) | 53.14<br>(42.09-64.30) | 5.74<br>(3.61-9.96)                                                                                                      | 100.00<br>(100.00-100.00) | 3.97<br>(2.39-7.52)       |
| Nigeria               | 38.79<br>(31.72-45.48)                                                                                                                             | 41.91<br>(35.32-48.58) | 47.25<br>(40.77-53.24) | 15.47<br>(13.08-25.83)                                                                                        | 17.99<br>(15.49-27.76) | 36.34<br>(32.65-43.67) | 73.52<br>(63.60-82.61)                                                                               | 76.49<br>(70.32-82.80) | 80.97<br>(69.25-89.46) | 100.00<br>(100.00-100.00)                                                                                                | 7.50<br>(4.60-13.77)      | 3.50<br>(2.10-6.45)       |
| Sao Tome and Principe | 41.84<br>(36.22-47.25)                                                                                                                             | 42.84<br>(37.14-48.49) | 43.79<br>(33.34-52.26) | 59.07<br>(49.88-68.37)                                                                                        | 59.34<br>(45.95-71.83) | 62.72<br>(48.41-75.06) | 40.47<br>(36.28-45.28)                                                                               | 38.47<br>(33.37-43.25) | 38.80<br>(28.10-50.08) | 100.00<br>(100.00-100.00)                                                                                                | 100.00<br>(100.00-100.00) | 100.00<br>(100.00-100.00) |
| Senegal               | 34.91<br>(28.70-40.80)                                                                                                                             | 39.23<br>(33.44-45.04) | 39.88<br>(31.78-46.87) | 33.88<br>(30.13-41.61)                                                                                        | 34.24<br>(30.42-42.16) | 36.62<br>(32.65-43.64) | 65.80<br>(59.43-72.51)                                                                               | 69.01<br>(62.56-74.88) | 69.67<br>(55.70-82.54) | 11.23<br>(6.87-19.65)                                                                                                    | 14.56<br>(9.70-22.89)     | 100.00<br>(100.00-100.00) |

**Appendix Table 1a. Scaled values for each SDG health-related indicator and three summary indicators by country for 1990, 2000, and 2015**

| Location     | Indicator 8.8.1: Age-standardised all-cause disability-adjusted life year (DALY) rates attributable to occupational risks (per 100,000 population) |                        |                        | Indicator 11.6.2: Population-weighted mean levels of fine particulate matter smaller than 2.5 microns (PM2.5) |                        |                        | Indicator 16.1.1: Age-standardised death rate due to interpersonal violence (per 100,000 population) |                        |                        | Indicator 16.1.2: Age-standardised death rate due to collective violence and legal intervention (per 100,000 population) |                           |                           |
|--------------|----------------------------------------------------------------------------------------------------------------------------------------------------|------------------------|------------------------|---------------------------------------------------------------------------------------------------------------|------------------------|------------------------|------------------------------------------------------------------------------------------------------|------------------------|------------------------|--------------------------------------------------------------------------------------------------------------------------|---------------------------|---------------------------|
|              | 1990                                                                                                                                               | 2000                   | 2015                   | 1990                                                                                                          | 2000                   | 2015                   | 1990                                                                                                 | 2000                   | 2015                   | 1990                                                                                                                     | 2000                      | 2015                      |
| Sierra Leone | 36.86<br>(30.29-43.57)                                                                                                                             | 38.38<br>(32.27-44.32) | 38.84<br>(31.99-45.08) | 46.36<br>(41.09-52.98)                                                                                        | 46.67<br>(38.98-53.76) | 54.05<br>(44.92-60.84) | 64.43<br>(55.01-75.36)                                                                               | 62.20<br>(56.58-67.82) | 64.64<br>(54.67-75.04) | 100.00<br>(100.00-100.00)                                                                                                | 1.76<br>(0.82-3.54)       | 100.00<br>(100.00-100.00) |
| Togo         | 27.88<br>(20.62-34.96)                                                                                                                             | 30.13<br>(23.59-37.00) | 32.73<br>(24.77-40.91) | 25.87<br>(20.58-34.40)                                                                                        | 26.92<br>(18.54-35.98) | 40.41<br>(33.31-48.12) | 56.01<br>(48.24-62.22)                                                                               | 50.76<br>(43.77-57.52) | 50.05<br>(39.82-60.95) | 100.00<br>(100.00-100.00)                                                                                                | 100.00<br>(100.00-100.00) | 100.00<br>(100.00-100.00) |
| Burundi      | 17.52<br>(6.54-27.18)                                                                                                                              | 22.77<br>(12.92-31.38) | 29.04<br>(19.92-38.04) | 30.93<br>(26.07-38.71)                                                                                        | 30.58<br>(25.76-39.10) | 31.56<br>(25.69-39.94) | 64.00<br>(53.14-76.46)                                                                               | 66.20<br>(57.67-75.33) | 73.65<br>(56.62-90.43) | 100.00<br>(100.00-100.00)                                                                                                | 1.27<br>(0.60-2.26)       | 4.87<br>(2.75-7.87)       |
| Comoros      | 43.34<br>(33.88-51.42)                                                                                                                             | 44.95<br>(36.74-51.48) | 46.75<br>(39.96-53.63) | 51.98<br>(43.89-59.46)                                                                                        | 51.85<br>(43.46-60.19) | 57.08<br>(49.15-65.48) | 41.49<br>(30.29-52.71)                                                                               | 33.86<br>(26.10-41.62) | 33.46<br>(22.08-45.56) | 100.00<br>(100.00-100.00)                                                                                                | 100.00<br>(100.00-100.00) | 100.00<br>(100.00-100.00) |
| Djibouti     | 61.03<br>(52.53-68.62)                                                                                                                             | 57.60<br>(47.87-65.86) | 56.72<br>(47.70-63.94) | 31.41<br>(19.16-43.51)                                                                                        | 30.01<br>(9.19-45.93)  | 29.54<br>(8.80-44.80)  | 44.09<br>(34.23-55.08)                                                                               | 32.47<br>(17.83-46.20) | 29.37<br>(14.66-43.76) | 100.00<br>(100.00-100.00)                                                                                                | 100.00<br>(100.00-100.00) | 100.00<br>(100.00-100.00) |
| Eritrea      | 37.01<br>(26.53-45.54)                                                                                                                             | 45.02<br>(34.93-53.89) | 43.40<br>(33.35-52.72) | 32.14<br>(28.06-40.35)                                                                                        | 32.69<br>(28.84-40.16) | 32.73<br>(28.69-40.45) | 37.89<br>(32.02-43.67)                                                                               | 35.03<br>(23.55-46.62) | 28.42<br>(15.01-41.87) | 100.00<br>(100.00-100.00)                                                                                                | 0.00<br>(0.00-0.00)       | 100.00<br>(100.00-100.00) |
| Ethiopia     | 32.59<br>(25.90-39.03)                                                                                                                             | 35.69<br>(28.97-42.46) | 36.94<br>(29.38-44.37) | 37.68<br>(33.71-44.80)                                                                                        | 38.13<br>(34.14-45.17) | 37.94<br>(33.82-45.23) | 29.61<br>(13.10-36.21)                                                                               | 34.27<br>(21.02-40.32) | 38.43<br>(24.89-49.85) | 0.56<br>(0.20-0.98)                                                                                                      | 11.16<br>(7.01-19.86)     | 17.24<br>(11.18-29.66)    |
| Kenya        | 37.41<br>(31.80-43.27)                                                                                                                             | 37.86<br>(32.16-43.58) | 39.98<br>(34.43-45.94) | 57.86<br>(52.58-63.04)                                                                                        | 58.27<br>(52.78-63.46) | 58.08<br>(52.56-63.13) | 25.22<br>(19.09-30.86)                                                                               | 24.69<br>(20.48-28.62) | 23.71<br>(19.21-27.77) | 23.61<br>(12.75-35.56)                                                                                                   | 11.82<br>(5.86-17.50)     | 10.24<br>(5.74-15.52)     |
| Madagascar   | 18.89<br>(9.84-27.18)                                                                                                                              | 18.87<br>(9.39-28.18)  | 19.96<br>(10.10-29.37) | 54.42<br>(49.46-60.12)                                                                                        | 53.77<br>(48.76-58.91) | 53.37<br>(48.32-58.83) | 73.07<br>(68.16-78.18)                                                                               | 52.74<br>(45.39-70.98) | 60.48<br>(47.21-77.72) | 100.00<br>(100.00-100.00)                                                                                                | 100.00<br>(100.00-100.00) | 11.99<br>(7.64-18.60)     |
| Malawi       | 31.77<br>(21.75-40.25)                                                                                                                             | 29.55<br>(19.32-38.02) | 32.36<br>(24.72-40.57) | 43.06<br>(38.45-49.88)                                                                                        | 43.25<br>(38.50-49.87) | 46.54<br>(41.89-52.21) | 64.99<br>(39.52-73.49)                                                                               | 59.07<br>(38.69-69.54) | 65.00<br>(41.20-77.86) | 22.17<br>(14.40-35.91)                                                                                                   | 100.00<br>(100.00-100.00) | 100.00<br>(100.00-100.00) |
| Mozambique   | 32.77<br>(23.18-41.65)                                                                                                                             | 31.26<br>(22.14-39.95) | 31.38<br>(23.16-39.73) | 49.97<br>(45.42-55.83)                                                                                        | 49.60<br>(44.42-55.60) | 53.54<br>(48.62-58.99) | 42.81<br>(35.46-49.47)                                                                               | 41.23<br>(35.81-47.62) | 36.72<br>(25.41-49.28) | 2.19<br>(1.13-3.83)                                                                                                      | 11.64<br>(6.68-18.74)     | 27.95<br>(19.19-41.33)    |

**Appendix Table 1a. Scaled values for each SDG health-related indicator and three summary indicators by country for 1990, 2000, and 2015**

| Location                         | Indicator 8.8.1: Age-standardised all-cause disability-adjusted life year (DALY) rates attributable to occupational risks (per 100,000 population) |                        |                        | Indicator 11.6.2: Population-weighted mean levels of fine particulate matter smaller than 2.5 microns (PM2.5) |                        |                        | Indicator 16.1.1: Age-standardised death rate due to interpersonal violence (per 100,000 population) |                        |                        | Indicator 16.1.2: Age-standardised death rate due to collective violence and legal intervention (per 100,000 population) |                           |                           |
|----------------------------------|----------------------------------------------------------------------------------------------------------------------------------------------------|------------------------|------------------------|---------------------------------------------------------------------------------------------------------------|------------------------|------------------------|------------------------------------------------------------------------------------------------------|------------------------|------------------------|--------------------------------------------------------------------------------------------------------------------------|---------------------------|---------------------------|
|                                  | 1990                                                                                                                                               | 2000                   | 2015                   | 1990                                                                                                          | 2000                   | 2015                   | 1990                                                                                                 | 2000                   | 2015                   | 1990                                                                                                                     | 2000                      | 2015                      |
| Rwanda                           | 24.15<br>(14.96-32.66)                                                                                                                             | 26.08<br>(17.26-34.10) | 32.84<br>(24.63-40.90) | 27.46<br>(22.64-36.37)                                                                                        | 27.04<br>(22.10-35.74) | 29.17<br>(23.98-37.20) | 34.36<br>(29.26-41.34)                                                                               | 38.67<br>(32.88-45.32) | 48.03<br>(36.84-57.28) | 1.15<br>(0.55-1.97)                                                                                                      | 6.98<br>(3.99-13.36)      | 100.00<br>(100.00-100.00) |
| Somalia                          | 42.31<br>(28.47-53.36)                                                                                                                             | 42.03<br>(29.38-53.51) | 42.54<br>(28.88-52.47) | 50.85<br>(45.59-56.72)                                                                                        | 50.03<br>(44.43-56.03) | 53.18<br>(47.51-58.64) | 38.46<br>(20.60-58.42)                                                                               | 28.05<br>(9.86-48.33)  | 26.09<br>(8.22-45.16)  | 1.04<br>(0.47-1.82)                                                                                                      | 5.98<br>(3.80-9.59)       | 1.29<br>(0.60-2.18)       |
| South Sudan                      | 39.00<br>(25.72-50.12)                                                                                                                             | 40.85<br>(28.25-50.40) | 42.36<br>(29.25-51.37) | 33.72<br>(30.26-41.22)                                                                                        | 33.22<br>(29.65-40.88) | 40.49<br>(36.61-47.16) | 46.76<br>(27.09-64.71)                                                                               | 37.38<br>(17.20-54.50) | 31.17<br>(9.39-49.11)  | 4.16<br>(2.37-6.74)                                                                                                      | 100.00<br>(100.00-100.00) | 1.51<br>(0.78-2.71)       |
| Tanzania                         | 37.36<br>(28.04-45.85)                                                                                                                             | 38.08<br>(29.70-46.55) | 38.75<br>(28.72-47.50) | 51.69<br>(46.89-57.18)                                                                                        | 50.14<br>(45.23-55.74) | 49.04<br>(44.23-54.74) | 36.86<br>(30.02-42.42)                                                                               | 39.07<br>(31.44-45.90) | 39.97<br>(27.89-49.95) | 100.00<br>(100.00-100.00)                                                                                                | 26.14<br>(18.24-41.59)    | 100.00<br>(100.00-100.00) |
| Uganda                           | 27.22<br>(17.31-35.90)                                                                                                                             | 27.99<br>(19.50-36.01) | 30.67<br>(21.65-39.68) | 23.69<br>(20.66-32.48)                                                                                        | 23.82<br>(21.04-32.79) | 23.84<br>(20.95-32.75) | 39.05<br>(31.63-48.56)                                                                               | 35.44<br>(29.67-43.73) | 37.33<br>(25.55-50.00) | 4.02<br>(2.46-6.65)                                                                                                      | 3.82<br>(2.21-6.52)       | 100.00<br>(100.00-100.00) |
| Zambia                           | 37.40<br>(28.21-45.22)                                                                                                                             | 31.23<br>(22.73-38.47) | 31.96<br>(24.43-40.04) | 40.53<br>(36.34-47.20)                                                                                        | 41.80<br>(36.91-49.72) | 45.55<br>(39.98-52.25) | 41.63<br>(35.87-47.82)                                                                               | 32.38<br>(27.56-38.15) | 31.07<br>(22.21-41.53) | 15.94<br>(10.09-25.70)                                                                                                   | 100.00<br>(100.00-100.00) | 100.00<br>(100.00-100.00) |
| Angola                           | 27.68<br>(12.68-39.98)                                                                                                                             | 29.65<br>(14.89-41.38) | 37.01<br>(21.04-47.42) | 37.24<br>(33.30-44.28)                                                                                        | 35.19<br>(31.35-42.56) | 37.73<br>(27.42-45.76) | 38.85<br>(22.71-59.05)                                                                               | 44.01<br>(25.45-62.27) | 45.80<br>(23.38-61.36) | 1.63<br>(0.82-3.17)                                                                                                      | 3.08<br>(1.89-5.93)       | 100.00<br>(100.00-100.00) |
| Central African Republic         | 20.48<br>(11.97-29.04)                                                                                                                             | 19.75<br>(8.93-30.27)  | 20.77<br>(9.42-32.44)  | 28.67<br>(22.08-37.71)                                                                                        | 27.98<br>(17.85-36.90) | 31.20<br>(20.78-39.98) | 37.42<br>(29.26-44.95)                                                                               | 35.15<br>(22.42-49.08) | 34.18<br>(18.66-50.23) | 100.00<br>(100.00-100.00)                                                                                                | 100.00<br>(100.00-100.00) | 3.20<br>(1.96-6.18)       |
| Congo                            | 31.83<br>(24.63-39.19)                                                                                                                             | 34.18<br>(26.70-41.73) | 40.39<br>(31.51-47.88) | 27.96<br>(21.84-37.50)                                                                                        | 23.95<br>(9.12-35.76)  | 28.32<br>(9.99-41.14)  | 40.86<br>(31.50-50.26)                                                                               | 40.25<br>(31.92-48.02) | 45.49<br>(32.79-56.16) | 100.00<br>(100.00-100.00)                                                                                                | 2.14<br>(1.29-3.99)       | 100.00<br>(100.00-100.00) |
| Democratic Republic of the Congo | 31.01<br>(21.75-39.45)                                                                                                                             | 29.59<br>(19.08-38.12) | 30.22<br>(20.91-38.86) | 30.13<br>(25.41-38.36)                                                                                        | 28.44<br>(22.24-37.68) | 31.06<br>(25.85-38.78) | 46.09<br>(36.70-56.65)                                                                               | 45.72<br>(39.59-51.81) | 47.33<br>(38.25-57.40) | 16.59<br>(10.70-33.99)                                                                                                   | 3.48<br>(2.31-5.01)       | 7.22<br>(4.64-14.13)      |
| Equatorial Guinea                | 21.52<br>(5.71-35.15)                                                                                                                              | 28.96<br>(13.95-40.37) | 40.90<br>(23.94-49.88) | 30.68<br>(23.56-38.50)                                                                                        | 27.71<br>(11.47-38.79) | 31.45<br>(14.21-42.71) | 36.80<br>(18.61-58.84)                                                                               | 41.76<br>(22.00-59.88) | 48.08<br>(25.92-61.03) | 100.00<br>(100.00-100.00)                                                                                                | 100.00<br>(100.00-100.00) | 100.00<br>(100.00-100.00) |

**Appendix Table 1a. Scaled values for each SDG health-related indicator and three summary indicators by country for 1990, 2000, and 2015**

| Location | Indicator 8.8.1: Age-standardised all-cause disability-adjusted life year (DALY) rates attributable to occupational risks (per 100,000 population) |                        |                        | Indicator 11.6.2: Population-weighted mean levels of fine particulate matter smaller than 2.5 microns (PM2.5) |                        |                        | Indicator 16.1.1: Age-standardised death rate due to interpersonal violence (per 100,000 population) |                        |                        | Indicator 16.1.2: Age-standardised death rate due to collective violence and legal intervention (per 100,000 population) |                           |                           |
|----------|----------------------------------------------------------------------------------------------------------------------------------------------------|------------------------|------------------------|---------------------------------------------------------------------------------------------------------------|------------------------|------------------------|------------------------------------------------------------------------------------------------------|------------------------|------------------------|--------------------------------------------------------------------------------------------------------------------------|---------------------------|---------------------------|
|          | 1990                                                                                                                                               | 2000                   | 2015                   | 1990                                                                                                          | 2000                   | 2015                   | 1990                                                                                                 | 2000                   | 2015                   | 1990                                                                                                                     | 2000                      | 2015                      |
| Gabon    | 44.60<br>(38.32-50.48)                                                                                                                             | 47.99<br>(41.53-53.71) | 52.71<br>(45.57-58.92) | 35.87<br>(20.81-45.20)                                                                                        | 34.33<br>(20.66-44.25) | 35.44<br>(23.58-44.65) | 43.66<br>(36.02-50.80)                                                                               | 44.39<br>(35.55-52.33) | 46.83<br>(33.50-58.35) | 100.00<br>(100.00-100.00)                                                                                                | 100.00<br>(100.00-100.00) | 100.00<br>(100.00-100.00) |

**Appendix Table 1b. Unscaled values for each SDG health-related indicator by country for 1990, 2000, and 2015**

| Location      | Indicator 1.5.1: Age-standardised death rate due to exposure to forces of nature (per 100,000 population) |                     |                     | Indicator 2.2.1: Prevalence of stunting among children under 5 years of age |                     |                     | Indicator 2.2.2a: Prevalence of wasting among children under 5 years of age |                     |                     | Indicator 2.2.2b: Prevalence of overweight among children aged 2 to 4 years |                        |                        |
|---------------|-----------------------------------------------------------------------------------------------------------|---------------------|---------------------|-----------------------------------------------------------------------------|---------------------|---------------------|-----------------------------------------------------------------------------|---------------------|---------------------|-----------------------------------------------------------------------------|------------------------|------------------------|
|               | 1990                                                                                                      | 2000                | 2015                | 1990                                                                        | 2000                | 2015                | 1990                                                                        | 2000                | 2015                | 1990                                                                        | 2000                   | 2015                   |
| Canada        | 0.00<br>(0.00-0.00)                                                                                       | 0.00<br>(0.00-0.00) | 0.00<br>(0.00-0.00) | 0.00<br>(0.00-0.00)                                                         | 0.00<br>(0.00-0.00) | 0.00<br>(0.00-0.00) | 0.00<br>(0.00-0.00)                                                         | 0.00<br>(0.00-0.00) | 0.00<br>(0.00-0.00) | 27.86<br>(20.86-35.84)                                                      | 38.41<br>(29.74-47.65) | 42.32<br>(33.76-51.28) |
| United States | 0.09<br>(0.05-0.17)                                                                                       | 0.08<br>(0.05-0.14) | 0.08<br>(0.05-0.15) | 0.00<br>(0.00-0.00)                                                         | 0.00<br>(0.00-0.00) | 0.00<br>(0.00-0.00) | 0.00<br>(0.00-0.00)                                                         | 0.00<br>(0.00-0.00) | 0.00<br>(0.00-0.00) | 15.34<br>(13.02-17.89)                                                      | 18.98<br>(16.28-21.64) | 21.13<br>(16.87-25.91) |
| Australia     | 0.00<br>(0.00-0.00)                                                                                       | 0.02<br>(0.01-0.04) | 0.02<br>(0.01-0.03) | 0.00<br>(0.00-0.00)                                                         | 0.00<br>(0.00-0.00) | 0.00<br>(0.00-0.00) | 0.00<br>(0.00-0.00)                                                         | 0.00<br>(0.00-0.00) | 0.00<br>(0.00-0.00) | 16.15<br>(12.01-20.77)                                                      | 18.01<br>(15.65-20.43) | 24.65<br>(18.53-32.24) |
| New Zealand   | 0.00<br>(0.00-0.00)                                                                                       | 0.04<br>(0.02-0.06) | 0.76<br>(0.42-1.10) | 0.00<br>(0.00-0.00)                                                         | 0.00<br>(0.00-0.00) | 0.00<br>(0.00-0.00) | 0.00<br>(0.00-0.00)                                                         | 0.00<br>(0.00-0.00) | 0.00<br>(0.00-0.00) | 33.70<br>(25.15-43.11)                                                      | 32.78<br>(24.44-41.84) | 30.41<br>(24.18-37.47) |
| Brunei        | 0.00<br>(0.00-0.00)                                                                                       | 0.00<br>(0.00-0.00) | 0.06<br>(0.01-0.11) | 0.00<br>(0.00-0.00)                                                         | 0.00<br>(0.00-0.00) | 0.00<br>(0.00-0.00) | 0.00<br>(0.00-0.00)                                                         | 0.00<br>(0.00-0.00) | 0.00<br>(0.00-0.00) | 10.48<br>(7.55-14.09)                                                       | 13.58<br>(9.93-18.27)  | 17.92<br>(13.35-23.50) |
| Japan         | 0.08<br>(0.01-0.19)                                                                                       | 0.04<br>(0.01-0.09) | 1.62<br>(0.10-4.14) | 0.00<br>(0.00-0.00)                                                         | 0.00<br>(0.00-0.00) | 0.00<br>(0.00-0.00) | 0.00<br>(0.00-0.00)                                                         | 0.00<br>(0.00-0.00) | 0.00<br>(0.00-0.00) | 7.99<br>(6.69-9.44)                                                         | 9.98<br>(7.95-12.33)   | 12.23<br>(9.06-15.65)  |
| Singapore     | 0.00<br>(0.00-0.00)                                                                                       | 0.03<br>(0.00-0.05) | 0.00<br>(0.00-0.00) | 0.00<br>(0.00-0.00)                                                         | 0.00<br>(0.00-0.00) | 0.00<br>(0.00-0.00) | 0.00<br>(0.00-0.00)                                                         | 0.00<br>(0.00-0.00) | 0.00<br>(0.00-0.00) | 16.41<br>(12.02-21.83)                                                      | 20.84<br>(15.50-26.67) | 25.43<br>(19.16-32.34) |
| South Korea   | 0.40<br>(0.06-0.76)                                                                                       | 0.15<br>(0.02-0.29) | 0.03<br>(0.00-0.06) | 0.00<br>(0.00-0.00)                                                         | 0.00<br>(0.00-0.00) | 0.00<br>(0.00-0.00) | 0.00<br>(0.00-0.00)                                                         | 0.00<br>(0.00-0.00) | 0.00<br>(0.00-0.00) | 21.54<br>(16.39-27.24)                                                      | 24.90<br>(19.02-31.53) | 29.98<br>(23.63-37.15) |
| Andorra       | 0.00<br>(0.00-0.00)                                                                                       | 0.00<br>(0.00-0.00) | 0.00<br>(0.00-0.00) | 0.00<br>(0.00-0.00)                                                         | 0.00<br>(0.00-0.00) | 0.00<br>(0.00-0.00) | 0.00<br>(0.00-0.00)                                                         | 0.00<br>(0.00-0.00) | 0.00<br>(0.00-0.00) | 25.67<br>(17.34-35.39)                                                      | 26.55<br>(18.05-35.76) | 28.47<br>(19.84-38.26) |
| Austria       | 0.00<br>(0.00-0.00)                                                                                       | 0.00<br>(0.00-0.00) | 0.07<br>(0.04-0.10) | 0.00<br>(0.00-0.00)                                                         | 0.00<br>(0.00-0.00) | 0.00<br>(0.00-0.00) | 0.00<br>(0.00-0.00)                                                         | 0.00<br>(0.00-0.00) | 0.00<br>(0.00-0.00) | 27.15<br>(18.11-37.31)                                                      | 30.81<br>(21.56-42.55) | 32.75<br>(22.96-43.83) |

**Appendix Table 1b. Unscaled values for each SDG health-related indicator by country for 1990, 2000, and 2015**

| Location | Indicator 1.5.1: Age-standardised death rate due to exposure to forces of nature (per 100,000 population) |                     |                     | Indicator 2.2.1: Prevalence of stunting among children under 5 years of age |                     |                     | Indicator 2.2.2a: Prevalence of wasting among children under 5 years of age |                     |                     | Indicator 2.2.2b: Prevalence of overweight among children aged 2 to 4 years |                        |                        |
|----------|-----------------------------------------------------------------------------------------------------------|---------------------|---------------------|-----------------------------------------------------------------------------|---------------------|---------------------|-----------------------------------------------------------------------------|---------------------|---------------------|-----------------------------------------------------------------------------|------------------------|------------------------|
|          | 1990                                                                                                      | 2000                | 2015                | 1990                                                                        | 2000                | 2015                | 1990                                                                        | 2000                | 2015                | 1990                                                                        | 2000                   | 2015                   |
| Belgium  | 0.09<br>(0.05-0.14)                                                                                       | 0.00<br>(0.00-0.00) | 0.00<br>(0.00-0.00) | 0.00<br>(0.00-0.00)                                                         | 0.00<br>(0.00-0.00) | 0.00<br>(0.00-0.00) | 0.00<br>(0.00-0.00)                                                         | 0.00<br>(0.00-0.00) | 0.00<br>(0.00-0.00) | 26.69<br>(18.12-36.58)                                                      | 29.89<br>(21.05-40.35) | 28.27<br>(19.49-38.46) |
| Cyprus   | 0.00<br>(0.00-0.00)                                                                                       | 0.00<br>(0.00-0.00) | 0.00<br>(0.00-0.00) | 0.00<br>(0.00-0.00)                                                         | 0.00<br>(0.00-0.00) | 0.00<br>(0.00-0.00) | 0.00<br>(0.00-0.00)                                                         | 0.00<br>(0.00-0.00) | 0.00<br>(0.00-0.00) | 31.41<br>(22.17-41.62)                                                      | 31.85<br>(22.58-41.90) | 30.75<br>(21.61-41.10) |
| Denmark  | 0.00<br>(0.00-0.00)                                                                                       | 0.00<br>(0.00-0.00) | 0.00<br>(0.00-0.00) | 0.00<br>(0.00-0.00)                                                         | 0.00<br>(0.00-0.00) | 0.00<br>(0.00-0.00) | 0.00<br>(0.00-0.00)                                                         | 0.00<br>(0.00-0.00) | 0.00<br>(0.00-0.00) | 28.53<br>(19.67-39.15)                                                      | 32.78<br>(23.04-44.08) | 32.13<br>(22.76-42.71) |
| Finland  | 0.00<br>(0.00-0.00)                                                                                       | 0.00<br>(0.00-0.00) | 0.00<br>(0.00-0.00) | 0.00<br>(0.00-0.00)                                                         | 0.00<br>(0.00-0.00) | 0.00<br>(0.00-0.00) | 0.00<br>(0.00-0.00)                                                         | 0.00<br>(0.00-0.00) | 0.00<br>(0.00-0.00) | 26.75<br>(18.00-36.45)                                                      | 24.89<br>(17.21-33.80) | 27.53<br>(19.52-37.38) |
| France   | 0.00<br>(0.00-0.00)                                                                                       | 0.05<br>(0.03-0.07) | 0.00<br>(0.00-0.00) | 0.00<br>(0.00-0.00)                                                         | 0.00<br>(0.00-0.00) | 0.00<br>(0.00-0.00) | 0.00<br>(0.00-0.00)                                                         | 0.00<br>(0.00-0.00) | 0.00<br>(0.00-0.00) | 23.82<br>(16.38-33.28)                                                      | 27.46<br>(19.14-37.72) | 27.08<br>(18.45-37.34) |
| Germany  | 0.00<br>(0.00-0.00)                                                                                       | 0.00<br>(0.00-0.00) | 0.00<br>(0.00-0.00) | 0.00<br>(0.00-0.00)                                                         | 0.00<br>(0.00-0.00) | 0.00<br>(0.00-0.00) | 0.00<br>(0.00-0.00)                                                         | 0.00<br>(0.00-0.00) | 0.00<br>(0.00-0.00) | 22.26<br>(14.92-30.99)                                                      | 26.94<br>(18.65-36.09) | 34.13<br>(24.42-44.78) |
| Greece   | 0.00<br>(0.00-0.00)                                                                                       | 0.21<br>(0.12-0.30) | 0.00<br>(0.00-0.00) | 0.00<br>(0.00-0.00)                                                         | 0.00<br>(0.00-0.00) | 0.00<br>(0.00-0.00) | 0.00<br>(0.00-0.00)                                                         | 0.00<br>(0.00-0.00) | 0.00<br>(0.00-0.00) | 34.02<br>(23.54-44.33)                                                      | 38.67<br>(28.40-49.18) | 40.48<br>(29.70-52.37) |
| Iceland  | 0.40<br>(0.07-0.78)                                                                                       | 0.72<br>(0.44-1.00) | 0.00<br>(0.00-0.00) | 0.00<br>(0.00-0.00)                                                         | 0.00<br>(0.00-0.00) | 0.00<br>(0.00-0.00) | 0.00<br>(0.00-0.00)                                                         | 0.00<br>(0.00-0.00) | 0.00<br>(0.00-0.00) | 39.99<br>(29.44-51.14)                                                      | 36.77<br>(26.33-47.72) | 36.91<br>(25.51-48.00) |
| Ireland  | 0.00<br>(0.00-0.00)                                                                                       | 0.00<br>(0.00-0.00) | 0.00<br>(0.00-0.00) | 0.00<br>(0.00-0.00)                                                         | 0.00<br>(0.00-0.00) | 0.00<br>(0.00-0.00) | 0.00<br>(0.00-0.00)                                                         | 0.00<br>(0.00-0.00) | 0.00<br>(0.00-0.00) | 29.12<br>(19.86-39.85)                                                      | 29.32<br>(23.14-36.26) | 31.73<br>(22.09-42.33) |
| Israel   | 0.00<br>(0.00-0.00)                                                                                       | 0.00<br>(0.00-0.00) | 0.00<br>(0.00-0.00) | 0.00<br>(0.00-0.00)                                                         | 0.00<br>(0.00-0.00) | 0.00<br>(0.00-0.00) | 0.00<br>(0.00-0.00)                                                         | 0.00<br>(0.00-0.00) | 0.00<br>(0.00-0.00) | 25.05<br>(16.85-34.28)                                                      | 29.04<br>(19.80-39.67) | 35.44<br>(25.00-46.67) |

**Appendix Table 1b. Unscaled values for each SDG health-related indicator by country for 1990, 2000, and 2015**

| Location       | Indicator 1.5.1: Age-standardised death rate due to exposure to forces of nature (per 100,000 population) |                     |                     | Indicator 2.2.1: Prevalence of stunting among children under 5 years of age |                     |                     | Indicator 2.2.2a: Prevalence of wasting among children under 5 years of age |                     |                     | Indicator 2.2.2b: Prevalence of overweight among children aged 2 to 4 years |                        |                        |
|----------------|-----------------------------------------------------------------------------------------------------------|---------------------|---------------------|-----------------------------------------------------------------------------|---------------------|---------------------|-----------------------------------------------------------------------------|---------------------|---------------------|-----------------------------------------------------------------------------|------------------------|------------------------|
|                | 1990                                                                                                      | 2000                | 2015                | 1990                                                                        | 2000                | 2015                | 1990                                                                        | 2000                | 2015                | 1990                                                                        | 2000                   | 2015                   |
| Italy          | 0.00<br>(0.00-0.00)                                                                                       | 0.04<br>(0.02-0.06) | 0.02<br>(0.01-0.03) | 0.00<br>(0.00-0.00)                                                         | 0.00<br>(0.00-0.00) | 0.00<br>(0.00-0.00) | 0.00<br>(0.00-0.00)                                                         | 0.00<br>(0.00-0.00) | 0.00<br>(0.00-0.00) | 33.64<br>(23.65-44.01)                                                      | 39.32<br>(29.24-49.80) | 39.21<br>(28.70-50.47) |
| Luxembourg     | 0.00<br>(0.00-0.00)                                                                                       | 0.00<br>(0.00-0.00) | 0.00<br>(0.00-0.00) | 0.00<br>(0.00-0.00)                                                         | 0.00<br>(0.00-0.00) | 0.00<br>(0.00-0.00) | 0.00<br>(0.00-0.00)                                                         | 0.00<br>(0.00-0.00) | 0.00<br>(0.00-0.00) | 23.45<br>(15.26-32.48)                                                      | 30.47<br>(21.16-41.47) | 33.92<br>(24.06-45.24) |
| Malta          | 0.00<br>(0.00-0.00)                                                                                       | 0.00<br>(0.00-0.00) | 0.00<br>(0.00-0.00) | 0.00<br>(0.00-0.00)                                                         | 0.00<br>(0.00-0.00) | 0.00<br>(0.00-0.00) | 0.00<br>(0.00-0.00)                                                         | 0.00<br>(0.00-0.00) | 0.00<br>(0.00-0.00) | 37.71<br>(27.48-49.11)                                                      | 42.16<br>(30.80-54.62) | 40.87<br>(29.67-53.16) |
| Netherlands    | 0.00<br>(0.00-0.00)                                                                                       | 0.00<br>(0.00-0.00) | 0.00<br>(0.00-0.00) | 0.00<br>(0.00-0.00)                                                         | 0.00<br>(0.00-0.00) | 0.00<br>(0.00-0.00) | 0.00<br>(0.00-0.00)                                                         | 0.00<br>(0.00-0.00) | 0.00<br>(0.00-0.00) | 18.04<br>(11.98-25.57)                                                      | 22.86<br>(15.41-31.52) | 28.05<br>(19.04-38.86) |
| Norway         | 0.11<br>(0.07-0.15)                                                                                       | 0.05<br>(0.03-0.07) | 0.06<br>(0.03-0.09) | 0.00<br>(0.00-0.00)                                                         | 0.00<br>(0.00-0.00) | 0.00<br>(0.00-0.00) | 0.00<br>(0.00-0.00)                                                         | 0.00<br>(0.00-0.00) | 0.00<br>(0.00-0.00) | 24.10<br>(15.93-34.11)                                                      | 27.35<br>(18.95-36.90) | 33.26<br>(23.43-43.35) |
| Portugal       | 0.00<br>(0.00-0.00)                                                                                       | 0.02<br>(0.01-0.03) | 0.00<br>(0.00-0.00) | 0.00<br>(0.00-0.00)                                                         | 0.00<br>(0.00-0.00) | 0.00<br>(0.00-0.00) | 0.00<br>(0.00-0.00)                                                         | 0.00<br>(0.00-0.00) | 0.00<br>(0.00-0.00) | 24.52<br>(16.34-33.38)                                                      | 33.08<br>(23.30-43.74) | 38.55<br>(28.69-49.51) |
| Spain          | 0.00<br>(0.00-0.00)                                                                                       | 0.06<br>(0.03-0.08) | 0.00<br>(0.00-0.00) | 0.00<br>(0.00-0.00)                                                         | 0.00<br>(0.00-0.00) | 0.00<br>(0.00-0.00) | 0.00<br>(0.00-0.00)                                                         | 0.00<br>(0.00-0.00) | 0.00<br>(0.00-0.00) | 47.65<br>(36.33-58.99)                                                      | 49.11<br>(37.80-60.11) | 42.70<br>(31.88-53.92) |
| Sweden         | 0.00<br>(0.00-0.00)                                                                                       | 0.00<br>(0.00-0.00) | 0.00<br>(0.00-0.00) | 0.00<br>(0.00-0.00)                                                         | 0.00<br>(0.00-0.00) | 0.00<br>(0.00-0.00) | 0.00<br>(0.00-0.00)                                                         | 0.00<br>(0.00-0.00) | 0.00<br>(0.00-0.00) | 25.83<br>(17.53-35.34)                                                      | 29.91<br>(20.24-40.51) | 31.55<br>(22.18-42.41) |
| Switzerland    | 0.00<br>(0.00-0.00)                                                                                       | 0.24<br>(0.13-0.35) | 0.10<br>(0.05-0.14) | 0.00<br>(0.00-0.00)                                                         | 0.00<br>(0.00-0.00) | 0.00<br>(0.00-0.00) | 0.00<br>(0.00-0.00)                                                         | 0.00<br>(0.00-0.00) | 0.00<br>(0.00-0.00) | 22.10<br>(13.98-30.89)                                                      | 22.23<br>(14.40-31.60) | 25.38<br>(17.39-35.46) |
| United Kingdom | 0.00<br>(0.00-0.00)                                                                                       | 0.00<br>(0.00-0.00) | 0.00<br>(0.00-0.00) | 0.00<br>(0.00-0.00)                                                         | 0.00<br>(0.00-0.00) | 0.00<br>(0.00-0.00) | 0.00<br>(0.00-0.00)                                                         | 0.00<br>(0.00-0.00) | 0.00<br>(0.00-0.00) | 22.05<br>(15.99-29.02)                                                      | 22.68<br>(19.94-25.67) | 23.66<br>(18.57-29.40) |

**Appendix Table 1b. Unscaled values for each SDG health-related indicator by country for 1990, 2000, and 2015**

| Location  | Indicator 1.5.1: Age-standardised death rate due to exposure to forces of nature (per 100,000 population) |                     |                     | Indicator 2.2.1: Prevalence of stunting among children under 5 years of age |                        |                       | Indicator 2.2.2a: Prevalence of wasting among children under 5 years of age |                      |                     | Indicator 2.2.2b: Prevalence of overweight among children aged 2 to 4 years |                        |                        |
|-----------|-----------------------------------------------------------------------------------------------------------|---------------------|---------------------|-----------------------------------------------------------------------------|------------------------|-----------------------|-----------------------------------------------------------------------------|----------------------|---------------------|-----------------------------------------------------------------------------|------------------------|------------------------|
|           | 1990                                                                                                      | 2000                | 2015                | 1990                                                                        | 2000                   | 2015                  | 1990                                                                        | 2000                 | 2015                | 1990                                                                        | 2000                   | 2015                   |
| Argentina | 0.00<br>(0.00-0.00)                                                                                       | 0.05<br>(0.01-0.09) | 0.03<br>(0.00-0.06) | 18.55<br>(12.86-25.41)                                                      | 10.96<br>(7.96-14.64)  | 6.55<br>(3.93-9.99)   | 2.30<br>(1.13-4.02)                                                         | 1.81<br>(0.96-3.15)  | 1.30<br>(0.57-2.59) | 36.09<br>(25.41-48.09)                                                      | 40.21<br>(27.83-53.65) | 45.18<br>(33.11-58.41) |
| Chile     | 0.00<br>(0.00-0.00)                                                                                       | 0.00<br>(0.00-0.00) | 0.20<br>(0.03-0.38) | 8.34<br>(5.93-11.37)                                                        | 3.25<br>(2.54-4.09)    | 1.95<br>(1.21-3.07)   | 0.50<br>(0.23-0.92)                                                         | 0.55<br>(0.31-0.90)  | 0.61<br>(0.27-1.24) | 31.71<br>(20.42-43.00)                                                      | 38.87<br>(26.44-51.85) | 46.29<br>(33.43-59.08) |
| Uruguay   | 0.00<br>(0.00-0.00)                                                                                       | 0.09<br>(0.01-0.18) | 0.00<br>(0.00-0.00) | 15.10<br>(12.16-18.37)                                                      | 13.75<br>(10.53-17.27) | 9.09<br>(5.53-13.47)  | 1.84<br>(1.06-3.12)                                                         | 2.24<br>(1.22-3.81)  | 1.89<br>(0.89-3.57) | 27.52<br>(17.99-39.08)                                                      | 32.24<br>(21.45-44.40) | 39.30<br>(27.66-52.51) |
| Belarus   | 0.00<br>(0.00-0.00)                                                                                       | 0.00<br>(0.00-0.00) | 0.00<br>(0.00-0.00) | 7.26<br>(4.71-10.71)                                                        | 6.05<br>(4.13-8.62)    | 2.51<br>(1.61-3.79)   | 3.42<br>(1.00-8.35)                                                         | 2.88<br>(1.05-6.43)  | 2.07<br>(0.65-5.08) | 19.86<br>(14.92-25.33)                                                      | 19.30<br>(14.81-24.47) | 23.10<br>(17.91-29.31) |
| Estonia   | 0.00<br>(0.00-0.00)                                                                                       | 0.03<br>(0.00-0.05) | 0.00<br>(0.00-0.00) | 13.87<br>(9.11-19.73)                                                       | 10.57<br>(7.12-15.19)  | 5.39<br>(3.43-8.14)   | 4.94<br>(1.42-11.77)                                                        | 3.70<br>(1.16-8.72)  | 2.65<br>(0.74-6.53) | 20.03<br>(15.10-25.78)                                                      | 21.04<br>(16.09-26.82) | 32.30<br>(25.34-39.14) |
| Latvia    | 0.00<br>(0.00-0.00)                                                                                       | 0.03<br>(0.01-0.06) | 0.00<br>(0.00-0.00) | 11.32<br>(7.34-15.88)                                                       | 11.16<br>(7.49-15.77)  | 5.29<br>(3.41-7.83)   | 4.21<br>(1.29-10.35)                                                        | 4.04<br>(1.20-9.77)  | 2.56<br>(0.87-6.12) | 23.85<br>(18.37-29.72)                                                      | 19.47<br>(14.74-24.58) | 29.65<br>(23.07-36.29) |
| Lithuania | 0.00<br>(0.00-0.00)                                                                                       | 0.06<br>(0.01-0.12) | 0.00<br>(0.00-0.00) | 12.46<br>(8.06-17.49)                                                       | 10.29<br>(6.89-14.98)  | 5.33<br>(3.42-7.82)   | 4.81<br>(1.51-11.24)                                                        | 3.83<br>(1.11-9.18)  | 2.69<br>(0.78-7.01) | 18.56<br>(13.96-23.52)                                                      | 18.22<br>(13.84-22.90) | 27.17<br>(21.38-33.80) |
| Moldova   | 0.00<br>(0.00-0.00)                                                                                       | 0.16<br>(0.07-0.26) | 0.06<br>(0.02-0.10) | 13.10<br>(9.05-18.62)                                                       | 14.03<br>(9.95-18.76)  | 5.56<br>(4.10-7.50)   | 7.18<br>(2.21-16.31)                                                        | 6.52<br>(2.42-13.60) | 2.65<br>(1.08-5.63) | 16.92<br>(12.89-21.83)                                                      | 15.50<br>(12.25-19.19) | 22.15<br>(17.05-27.70) |
| Russia    | 0.24<br>(0.04-0.46)                                                                                       | 0.49<br>(0.08-0.94) | 0.03<br>(0.00-0.06) | 19.72<br>(15.46-24.56)                                                      | 17.26<br>(12.52-22.76) | 10.03<br>(6.60-14.78) | 4.27<br>(1.77-8.44)                                                         | 4.29<br>(1.62-9.56)  | 3.20<br>(1.01-7.95) | 32.08<br>(27.59-36.29)                                                      | 26.82<br>(21.90-32.71) | 34.71<br>(28.12-41.64) |
| Ukraine   | 0.00<br>(0.00-0.00)                                                                                       | 0.00<br>(0.00-0.00) | 0.00<br>(0.00-0.00) | 21.58<br>(15.11-29.12)                                                      | 20.42<br>(17.26-23.85) | 11.18<br>(7.17-15.70) | 4.08<br>(1.25-10.30)                                                        | 3.27<br>(1.52-6.00)  | 1.86<br>(0.54-4.81) | 17.67<br>(13.23-23.04)                                                      | 15.23<br>(11.40-19.40) | 21.28<br>(16.54-27.25) |

**Appendix Table 1b. Unscaled values for each SDG health-related indicator by country for 1990, 2000, and 2015**

| Location               | Indicator 1.5.1: Age-standardised death rate due to exposure to forces of nature (per 100,000 population) |                     |                     | Indicator 2.2.1: Prevalence of stunting among children under 5 years of age |                        |                        | Indicator 2.2.2a: Prevalence of wasting among children under 5 years of age |                       |                     | Indicator 2.2.2b: Prevalence of overweight among children aged 2 to 4 years |                        |                        |
|------------------------|-----------------------------------------------------------------------------------------------------------|---------------------|---------------------|-----------------------------------------------------------------------------|------------------------|------------------------|-----------------------------------------------------------------------------|-----------------------|---------------------|-----------------------------------------------------------------------------|------------------------|------------------------|
|                        | 1990                                                                                                      | 2000                | 2015                | 1990                                                                        | 2000                   | 2015                   | 1990                                                                        | 2000                  | 2015                | 1990                                                                        | 2000                   | 2015                   |
| Albania                | 0.00<br>(0.00-0.00)                                                                                       | 0.38<br>(0.22-0.56) | 0.00<br>(0.00-0.00) | 50.46<br>(41.53-59.52)                                                      | 46.50<br>(41.85-51.25) | 21.64<br>(16.22-28.27) | 11.48<br>(8.02-15.78)                                                       | 12.03<br>(9.79-14.56) | 7.13<br>(5.00-9.86) | 33.82<br>(25.18-43.47)                                                      | 39.95<br>(31.24-48.67) | 44.22<br>(34.95-53.35) |
| Bosnia and Herzegovina | 0.00<br>(0.00-0.00)                                                                                       | 0.00<br>(0.00-0.00) | 0.12<br>(0.03-0.21) | 23.37<br>(17.13-30.75)                                                      | 13.00<br>(10.79-15.53) | 7.32<br>(5.44-9.80)    | 8.43<br>(5.79-11.75)                                                        | 6.80<br>(5.42-8.26)   | 3.31<br>(2.25-4.51) | 20.36<br>(14.44-27.73)                                                      | 26.97<br>(20.49-34.04) | 33.79<br>(26.15-42.77) |
| Bulgaria               | 0.00<br>(0.00-0.00)                                                                                       | 0.24<br>(0.16-0.32) | 0.04<br>(0.01-0.06) | 10.01<br>(7.05-13.64)                                                       | 9.94<br>(7.20-13.32)   | 6.13<br>(4.16-8.70)    | 5.22<br>(3.33-7.61)                                                         | 5.54<br>(3.90-7.77)   | 4.49<br>(2.99-6.37) | 52.25<br>(42.64-62.11)                                                      | 39.02<br>(30.28-49.21) | 39.15<br>(29.86-48.92) |
| Croatia                | 0.00<br>(0.00-0.00)                                                                                       | 0.00<br>(0.00-0.00) | 0.00<br>(0.00-0.00) | 13.64<br>(9.60-18.74)                                                       | 11.54<br>(8.05-15.86)  | 6.48<br>(4.39-9.28)    | 5.56<br>(3.70-8.06)                                                         | 5.44<br>(3.51-7.85)   | 3.80<br>(2.47-5.58) | 22.13<br>(15.97-29.18)                                                      | 24.04<br>(17.02-31.85) | 34.82<br>(26.33-43.75) |
| Czech Republic         | 0.00<br>(0.00-0.00)                                                                                       | 0.04<br>(0.01-0.08) | 0.00<br>(0.00-0.00) | 3.23<br>(2.60-3.90)                                                         | 2.69<br>(2.21-3.26)    | 1.86<br>(1.25-2.68)    | 3.05<br>(2.40-3.79)                                                         | 4.32<br>(3.45-5.28)   | 3.60<br>(2.36-5.31) | 26.31<br>(19.11-34.45)                                                      | 27.19<br>(19.69-35.24) | 29.71<br>(22.07-37.68) |
| Hungary                | 0.00<br>(0.00-0.00)                                                                                       | 0.07<br>(0.02-0.13) | 0.00<br>(0.00-0.00) | 3.06<br>(2.17-4.08)                                                         | 2.89<br>(1.89-4.13)    | 1.95<br>(1.34-2.78)    | 4.15<br>(2.97-5.85)                                                         | 4.22<br>(2.72-6.22)   | 3.64<br>(2.41-5.23) | 40.37<br>(30.91-49.28)                                                      | 32.10<br>(24.76-41.18) | 34.07<br>(26.20-43.46) |
| Macedonia              | 0.00<br>(0.00-0.00)                                                                                       | 0.34<br>(0.19-0.50) | 0.00<br>(0.00-0.00) | 10.41<br>(7.46-14.26)                                                       | 9.12<br>(7.37-11.09)   | 4.42<br>(3.28-5.75)    | 3.31<br>(2.24-4.82)                                                         | 2.84<br>(2.12-3.76)   | 2.16<br>(1.50-2.98) | 24.05<br>(17.28-31.95)                                                      | 25.51<br>(18.40-33.59) | 28.47<br>(21.27-36.75) |
| Montenegro             | 0.00<br>(0.00-0.00)                                                                                       | 0.00<br>(0.00-0.00) | 0.00<br>(0.00-0.00) | 13.92<br>(9.75-19.35)                                                       | 11.19<br>(8.10-14.66)  | 8.61<br>(6.35-11.18)   | 5.68<br>(3.79-8.11)                                                         | 4.96<br>(3.34-7.08)   | 3.09<br>(2.24-4.14) | 28.87<br>(21.36-37.56)                                                      | 28.05<br>(20.66-36.38) | 35.76<br>(29.64-42.87) |
| Poland                 | 0.00<br>(0.00-0.00)                                                                                       | 0.03<br>(0.01-0.05) | 0.00<br>(0.00-0.00) | 8.25<br>(5.66-11.49)                                                        | 6.61<br>(4.56-9.14)    | 3.92<br>(2.64-5.55)    | 3.94<br>(2.61-5.79)                                                         | 4.02<br>(2.61-6.09)   | 2.96<br>(1.94-4.33) | 30.25<br>(22.60-39.14)                                                      | 30.12<br>(22.27-38.17) | 32.43<br>(24.30-41.44) |
| Romania                | 0.00<br>(0.00-0.00)                                                                                       | 0.18<br>(0.09-0.28) | 0.04<br>(0.02-0.07) | 11.86<br>(9.75-14.12)                                                       | 13.83<br>(12.45-15.26) | 8.40<br>(5.76-11.69)   | 3.47<br>(2.77-4.32)                                                         | 3.85<br>(3.37-4.34)   | 3.28<br>(2.12-4.70) | 23.19<br>(16.76-30.69)                                                      | 25.83<br>(18.62-33.81) | 31.45<br>(23.59-40.63) |

**Appendix Table 1b. Unscaled values for each SDG health-related indicator by country for 1990, 2000, and 2015**

| Location   | Indicator 1.5.1: Age-standardised death rate due to exposure to forces of nature (per 100,000 population) |                     |                     | Indicator 2.2.1: Prevalence of stunting among children under 5 years of age |                        |                        | Indicator 2.2.2a: Prevalence of wasting among children under 5 years of age |                       |                      | Indicator 2.2.2b: Prevalence of overweight among children aged 2 to 4 years |                        |                        |
|------------|-----------------------------------------------------------------------------------------------------------|---------------------|---------------------|-----------------------------------------------------------------------------|------------------------|------------------------|-----------------------------------------------------------------------------|-----------------------|----------------------|-----------------------------------------------------------------------------|------------------------|------------------------|
|            | 1990                                                                                                      | 2000                | 2015                | 1990                                                                        | 2000                   | 2015                   | 1990                                                                        | 2000                  | 2015                 | 1990                                                                        | 2000                   | 2015                   |
| Serbia     | 0.00<br>(0.00-0.00)                                                                                       | 0.07<br>(0.04-0.10) | 0.11<br>(0.02-0.18) | 12.13<br>(8.62-16.60)                                                       | 10.54<br>(7.96-13.84)  | 5.96<br>(4.64-7.46)    | 5.56<br>(3.61-8.06)                                                         | 5.28<br>(3.76-7.35)   | 3.87<br>(2.93-5.00)  | 28.83<br>(21.61-37.16)                                                      | 26.23<br>(18.92-33.78) | 23.41<br>(19.45-27.75) |
| Slovakia   | 0.00<br>(0.00-0.00)                                                                                       | 0.22<br>(0.07-0.37) | 0.02<br>(0.01-0.04) | 9.88<br>(6.88-14.02)                                                        | 8.48<br>(5.86-12.09)   | 4.62<br>(3.11-6.55)    | 4.51<br>(3.00-6.45)                                                         | 4.63<br>(3.05-6.59)   | 3.30<br>(2.17-4.81)  | 26.07<br>(19.04-33.95)                                                      | 25.02<br>(18.28-33.36) | 25.34<br>(18.82-33.11) |
| Slovenia   | 0.15<br>(0.03-0.29)                                                                                       | 0.07<br>(0.03-0.11) | 0.00<br>(0.00-0.00) | 8.89<br>(6.01-12.87)                                                        | 6.82<br>(4.65-9.53)    | 4.32<br>(3.04-6.07)    | 4.59<br>(3.03-6.62)                                                         | 4.37<br>(2.89-6.35)   | 3.22<br>(2.10-4.65)  | 28.97<br>(21.54-36.63)                                                      | 32.22<br>(24.52-40.32) | 39.04<br>(30.25-48.26) |
| Armenia    | 0.00<br>(0.00-0.00)                                                                                       | 0.00<br>(0.00-0.00) | 0.05<br>(0.02-0.07) | 19.30<br>(14.27-25.46)                                                      | 18.42<br>(15.44-21.54) | 13.71<br>(10.57-17.58) | 4.24<br>(2.05-7.50)                                                         | 4.02<br>(2.48-6.02)   | 3.94<br>(1.94-6.83)  | 24.51<br>(18.08-31.74)                                                      | 25.62<br>(21.64-30.16) | 35.42<br>(28.40-43.53) |
| Azerbaijan | 0.00<br>(0.00-0.00)                                                                                       | 0.14<br>(0.06-0.23) | 0.00<br>(0.00-0.00) | 24.93<br>(19.42-31.27)                                                      | 24.13<br>(20.69-27.53) | 14.38<br>(10.70-18.98) | 5.71<br>(2.90-10.10)                                                        | 5.94<br>(3.75-8.69)   | 5.01<br>(2.28-9.02)  | 13.96<br>(10.03-18.63)                                                      | 15.25<br>(11.60-19.86) | 35.81<br>(28.02-44.48) |
| Georgia    | 0.00<br>(0.00-0.00)                                                                                       | 0.00<br>(0.00-0.00) | 0.29<br>(0.12-0.45) | 17.68<br>(13.13-22.99)                                                      | 16.98<br>(13.95-20.43) | 10.80<br>(8.03-13.91)  | 4.26<br>(2.06-7.68)                                                         | 3.36<br>(1.92-5.35)   | 2.54<br>(1.18-4.58)  | 22.68<br>(16.72-29.83)                                                      | 25.89<br>(19.43-33.04) | 34.79<br>(27.00-43.73) |
| Kazakhstan | 0.00<br>(0.00-0.00)                                                                                       | 0.00<br>(0.00-0.00) | 0.00<br>(0.00-0.00) | 19.05<br>(14.66-24.07)                                                      | 17.73<br>(14.52-21.41) | 10.08<br>(7.68-12.93)  | 5.54<br>(2.84-9.56)                                                         | 4.53<br>(2.65-7.11)   | 4.10<br>(2.11-7.20)  | 19.30<br>(14.48-25.11)                                                      | 17.04<br>(13.53-20.96) | 31.08<br>(23.78-39.64) |
| Kyrgyzstan | 0.00<br>(0.00-0.00)                                                                                       | 0.08<br>(0.04-0.13) | 0.18<br>(0.08-0.28) | 30.14<br>(24.03-37.13)                                                      | 27.42<br>(22.46-32.31) | 14.93<br>(12.31-17.86) | 4.11<br>(1.90-7.55)                                                         | 3.94<br>(2.10-6.53)   | 3.34<br>(1.97-5.39)  | 24.12<br>(18.42-31.01)                                                      | 20.80<br>(16.01-26.66) | 19.66<br>(15.75-24.20) |
| Mongolia   | 1.90<br>(0.82-2.99)                                                                                       | 0.58<br>(0.25-0.92) | 0.00<br>(0.00-0.00) | 32.22<br>(27.66-37.32)                                                      | 29.47<br>(26.61-32.52) | 13.96<br>(10.66-17.72) | 3.29<br>(1.75-5.68)                                                         | 3.83<br>(2.40-5.83)   | 2.02<br>(0.98-3.75)  | 27.38<br>(20.21-35.39)                                                      | 22.89<br>(17.20-29.59) | 28.85<br>(21.68-36.58) |
| Tajikistan | 0.00<br>(0.00-0.00)                                                                                       | 0.50<br>(0.21-0.79) | 0.08<br>(0.03-0.13) | 34.54<br>(27.26-42.17)                                                      | 40.00<br>(37.39-42.47) | 26.53<br>(22.21-31.26) | 11.89<br>(6.25-20.46)                                                       | 11.95<br>(8.25-16.24) | 9.03<br>(4.85-14.80) | 14.83<br>(10.60-19.85)                                                      | 12.56<br>(8.83-16.87)  | 14.25<br>(11.06-17.99) |

**Appendix Table 1b. Unscaled values for each SDG health-related indicator by country for 1990, 2000, and 2015**

| Location     | Indicator 1.5.1: Age-standardised death rate due to exposure to forces of nature (per 100,000 population) |                        |                     | Indicator 2.2.1: Prevalence of stunting among children under 5 years of age |                        |                        | Indicator 2.2.2a: Prevalence of wasting among children under 5 years of age |                      |                     | Indicator 2.2.2b: Prevalence of overweight among children aged 2 to 4 years |                        |                        |
|--------------|-----------------------------------------------------------------------------------------------------------|------------------------|---------------------|-----------------------------------------------------------------------------|------------------------|------------------------|-----------------------------------------------------------------------------|----------------------|---------------------|-----------------------------------------------------------------------------|------------------------|------------------------|
|              | 1990                                                                                                      | 2000                   | 2015                | 1990                                                                        | 2000                   | 2015                   | 1990                                                                        | 2000                 | 2015                | 1990                                                                        | 2000                   | 2015                   |
| Turkmenistan | 0.00<br>(0.00-0.00)                                                                                       | 0.05<br>(0.03-0.08)    | 0.00<br>(0.00-0.00) | 28.46<br>(22.12-35.57)                                                      | 26.64<br>(22.34-31.24) | 13.46<br>(10.00-17.61) | 7.06<br>(3.43-12.92)                                                        | 7.06<br>(4.20-11.40) | 5.34<br>(2.47-9.79) | 21.73<br>(16.18-28.42)                                                      | 23.73<br>(17.58-30.72) | 34.49<br>(26.73-42.79) |
| Uzbekistan   | 0.00<br>(0.00-0.00)                                                                                       | 0.00<br>(0.00-0.00)    | 0.00<br>(0.00-0.00) | 35.75<br>(28.34-42.61)                                                      | 29.88<br>(25.29-34.58) | 15.10<br>(11.27-19.68) | 9.00<br>(4.40-15.43)                                                        | 8.76<br>(5.21-13.82) | 5.02<br>(2.35-9.06) | 33.42<br>(26.35-41.08)                                                      | 28.71<br>(23.16-34.36) | 29.52<br>(22.19-38.17) |
| Colombia     | 0.35<br>(0.19-0.50)                                                                                       | 0.81<br>(0.46-1.16)    | 0.28<br>(0.16-0.40) | 22.45<br>(20.67-24.35)                                                      | 18.19<br>(16.77-19.68) | 11.74<br>(9.93-13.76)  | 2.42<br>(1.71-3.30)                                                         | 1.57<br>(1.11-2.15)  | 1.30<br>(0.78-1.97) | 11.34<br>(8.46-14.88)                                                       | 11.94<br>(10.19-13.94) | 8.69<br>(5.70-12.43)   |
| Costa Rica   | 0.00<br>(0.00-0.00)                                                                                       | 0.50<br>(0.28-0.72)    | 0.06<br>(0.04-0.08) | 9.81<br>(8.10-11.70)                                                        | 7.53<br>(6.26-8.91)    | 4.65<br>(3.83-5.55)    | 1.63<br>(1.00-2.49)                                                         | 1.41<br>(0.87-2.21)  | 1.13<br>(0.66-1.71) | 25.81<br>(16.73-36.07)                                                      | 30.98<br>(20.46-43.24) | 37.42<br>(26.36-49.17) |
| El Salvador  | 0.00<br>(0.00-0.00)                                                                                       | 2.06<br>(1.16-2.95)    | 0.22<br>(0.12-0.31) | 34.26<br>(31.34-37.29)                                                      | 24.00<br>(21.17-26.99) | 17.40<br>(14.85-20.14) | 2.00<br>(1.50-2.63)                                                         | 1.50<br>(1.15-1.90)  | 1.51<br>(0.94-2.24) | 10.98<br>(7.88-14.79)                                                       | 12.04<br>(9.78-14.97)  | 14.77<br>(9.71-21.12)  |
| Guatemala    | 0.00<br>(0.00-0.00)                                                                                       | 1.01<br>(0.57-1.46)    | 0.51<br>(0.36-0.65) | 59.43<br>(56.09-63.02)                                                      | 51.58<br>(48.85-54.31) | 43.05<br>(38.30-48.05) | 2.96<br>(2.02-4.17)                                                         | 3.76<br>(2.78-4.80)  | 2.13<br>(1.30-3.27) | 13.43<br>(10.40-16.88)                                                      | 17.99<br>(15.87-20.24) | 17.01<br>(11.33-24.08) |
| Honduras     | 0.00<br>(0.00-0.00)                                                                                       | 57.32<br>(32.29-82.29) | 0.13<br>(0.07-0.19) | 43.49<br>(40.91-45.93)                                                      | 35.08<br>(31.98-38.19) | 21.39<br>(18.70-24.31) | 2.26<br>(1.87-2.73)                                                         | 1.60<br>(1.23-2.06)  | 1.39<br>(0.96-2.04) | 7.63<br>(4.76-11.41)                                                        | 9.90<br>(7.75-12.60)   | 14.17<br>(10.04-19.50) |
| Mexico       | 0.47<br>(0.15-1.06)                                                                                       | 0.47<br>(0.20-1.02)    | 0.10<br>(0.05-0.21) | 26.77<br>(25.87-27.74)                                                      | 18.81<br>(18.15-19.55) | 13.20<br>(12.70-13.75) | 5.48<br>(4.93-6.10)                                                         | 2.22<br>(2.00-2.49)  | 1.94<br>(1.72-2.18) | 30.82<br>(21.50-42.00)                                                      | 30.40<br>(20.40-41.67) | 22.45<br>(15.31-30.25) |
| Nicaragua    | 0.00<br>(0.00-0.00)                                                                                       | 16.21<br>(9.13-23.27)  | 0.22<br>(0.13-0.32) | 29.78<br>(26.51-33.28)                                                      | 25.51<br>(23.10-28.05) | 16.23<br>(13.72-19.09) | 3.18<br>(2.09-4.63)                                                         | 2.26<br>(1.71-2.98)  | 1.21<br>(0.71-1.84) | 15.96<br>(10.42-22.30)                                                      | 16.27<br>(13.57-19.52) | 18.42<br>(12.20-26.73) |
| Panama       | 0.00<br>(0.00-0.00)                                                                                       | 0.24<br>(0.13-0.36)    | 0.19<br>(0.12-0.25) | 13.12<br>(11.51-14.69)                                                      | 9.71<br>(8.11-11.47)   | 5.36<br>(4.43-6.48)    | 2.51<br>(1.84-3.36)                                                         | 1.44<br>(1.04-1.96)  | 1.20<br>(0.73-1.87) | 12.93<br>(8.17-19.20)                                                       | 13.47<br>(8.36-19.88)  | 16.65<br>(10.29-24.91) |

**Appendix Table 1b. Unscaled values for each SDG health-related indicator by country for 1990, 2000, and 2015**

| Location            | Indicator 1.5.1: Age-standardised death rate due to exposure to forces of nature (per 100,000 population) |                        |                     | Indicator 2.2.1: Prevalence of stunting among children under 5 years of age |                        |                        | Indicator 2.2.2a: Prevalence of wasting among children under 5 years of age |                     |                     | Indicator 2.2.2b: Prevalence of overweight among children aged 2 to 4 years |                        |                        |
|---------------------|-----------------------------------------------------------------------------------------------------------|------------------------|---------------------|-----------------------------------------------------------------------------|------------------------|------------------------|-----------------------------------------------------------------------------|---------------------|---------------------|-----------------------------------------------------------------------------|------------------------|------------------------|
|                     | 1990                                                                                                      | 2000                   | 2015                | 1990                                                                        | 2000                   | 2015                   | 1990                                                                        | 2000                | 2015                | 1990                                                                        | 2000                   | 2015                   |
| Venezuela           | 0.00<br>(0.00-0.00)                                                                                       | 28.27<br>(15.93-40.59) | 0.00<br>(0.00-0.00) | 18.68<br>(17.41-19.94)                                                      | 18.05<br>(16.95-19.18) | 10.35<br>(8.68-12.23)  | 4.05<br>(3.53-4.68)                                                         | 4.08<br>(3.39-4.74) | 3.31<br>(2.13-4.99) | 24.59<br>(16.40-35.21)                                                      | 22.42<br>(14.06-31.61) | 26.93<br>(18.10-37.87) |
| Bolivia             | 0.00<br>(0.00-0.00)                                                                                       | 0.88<br>(0.14-1.69)    | 0.68<br>(0.11-1.31) | 41.00<br>(37.93-43.90)                                                      | 32.69<br>(30.41-35.11) | 22.12<br>(18.83-25.51) | 2.19<br>(1.51-3.13)                                                         | 1.97<br>(1.36-2.74) | 1.54<br>(0.92-2.42) | 23.73<br>(21.14-26.56)                                                      | 25.82<br>(23.35-28.80) | 27.03<br>(23.00-31.29) |
| Ecuador             | 0.00<br>(0.00-0.00)                                                                                       | 0.75<br>(0.12-1.45)    | 0.17<br>(0.03-0.34) | 37.50<br>(33.75-41.00)                                                      | 30.57<br>(27.66-33.62) | 19.41<br>(16.47-22.44) | 2.61<br>(1.74-3.85)                                                         | 2.89<br>(2.05-3.91) | 2.01<br>(1.21-3.05) | 16.03<br>(13.32-19.33)                                                      | 16.91<br>(14.48-19.88) | 19.94<br>(17.29-22.80) |
| Peru                | 1.59<br>(0.25-3.04)                                                                                       | 1.03<br>(0.16-1.98)    | 0.16<br>(0.03-0.30) | 36.87<br>(33.60-40.16)                                                      | 31.35<br>(28.80-34.02) | 17.88<br>(15.87-20.13) | 2.13<br>(1.53-2.91)                                                         | 1.38<br>(1.03-1.83) | 0.63<br>(0.43-0.93) | 24.79<br>(21.93-27.90)                                                      | 25.88<br>(23.37-28.54) | 20.88<br>(18.32-23.69) |
| Antigua and Barbuda | 0.00<br>(0.00-0.00)                                                                                       | 0.00<br>(0.00-0.00)    | 0.00<br>(0.00-0.00) | 7.50<br>(5.69-9.86)                                                         | 5.55<br>(4.12-7.24)    | 3.65<br>(2.72-4.89)    | 3.26<br>(1.97-4.95)                                                         | 3.05<br>(1.80-4.83) | 2.37<br>(1.44-3.66) | 13.80<br>(10.20-18.19)                                                      | 16.84<br>(12.36-21.73) | 15.78<br>(11.72-20.33) |
| The Bahamas         | 0.00<br>(0.00-0.00)                                                                                       | 0.15<br>(0.02-0.29)    | 0.00<br>(0.00-0.00) | 7.28<br>(5.47-9.55)                                                         | 5.34<br>(3.83-7.08)    | 4.28<br>(3.12-5.67)    | 3.20<br>(1.97-4.92)                                                         | 2.94<br>(1.82-4.55) | 2.64<br>(1.61-4.00) | 24.16<br>(18.12-30.79)                                                      | 27.07<br>(21.25-33.92) | 26.17<br>(20.49-32.62) |
| Barbados            | 0.00<br>(0.00-0.00)                                                                                       | 0.00<br>(0.00-0.00)    | 0.00<br>(0.00-0.00) | 8.61<br>(6.60-11.26)                                                        | 9.98<br>(7.59-12.84)   | 6.58<br>(5.04-8.48)    | 3.55<br>(2.14-5.34)                                                         | 6.49<br>(3.98-9.76) | 5.61<br>(3.77-8.06) | 23.19<br>(18.00-29.00)                                                      | 23.79<br>(18.25-29.30) | 27.90<br>(21.81-34.17) |
| Belize              | 0.00<br>(0.00-0.00)                                                                                       | 1.37<br>(0.22-2.62)    | 0.00<br>(0.00-0.00) | 35.56<br>(28.82-43.09)                                                      | 26.88<br>(21.69-32.61) | 17.29<br>(14.01-21.07) | 3.92<br>(2.42-6.24)                                                         | 3.39<br>(2.12-5.24) | 3.20<br>(2.08-4.51) | 17.19<br>(13.23-21.85)                                                      | 20.04<br>(15.54-25.68) | 17.67<br>(13.39-22.29) |
| Cuba                | 0.00<br>(0.00-0.00)                                                                                       | 0.53<br>(0.08-1.01)    | 0.24<br>(0.04-0.46) | 8.76<br>(6.61-11.23)                                                        | 7.53<br>(6.25-8.91)    | 7.32<br>(5.74-9.09)    | 3.08<br>(1.92-4.62)                                                         | 2.79<br>(2.00-3.82) | 2.36<br>(1.61-3.35) | 25.31<br>(19.31-31.98)                                                      | 23.85<br>(18.26-30.14) | 33.03<br>(26.15-40.17) |
| Dominica            | 0.00<br>(0.00-0.00)                                                                                       | 0.32<br>(0.05-0.61)    | 0.00<br>(0.00-0.00) | 11.82<br>(8.92-15.34)                                                       | 7.96<br>(5.98-10.39)   | 5.18<br>(3.85-6.96)    | 3.56<br>(2.14-5.60)                                                         | 3.13<br>(1.88-4.95) | 2.51<br>(1.53-3.92) | 15.53<br>(11.78-20.10)                                                      | 19.72<br>(14.75-25.32) | 20.91<br>(15.77-26.75) |

**Appendix Table 1b. Unscaled values for each SDG health-related indicator by country for 1990, 2000, and 2015**

| Location                         | Indicator 1.5.1: Age-standardised death rate due to exposure to forces of nature (per 100,000 population) |                     |                     | Indicator 2.2.1: Prevalence of stunting among children under 5 years of age |                        |                        | Indicator 2.2.2a: Prevalence of wasting among children under 5 years of age |                       |                      | Indicator 2.2.2b: Prevalence of overweight among children aged 2 to 4 years |                        |                        |
|----------------------------------|-----------------------------------------------------------------------------------------------------------|---------------------|---------------------|-----------------------------------------------------------------------------|------------------------|------------------------|-----------------------------------------------------------------------------|-----------------------|----------------------|-----------------------------------------------------------------------------|------------------------|------------------------|
|                                  | 1990                                                                                                      | 2000                | 2015                | 1990                                                                        | 2000                   | 2015                   | 1990                                                                        | 2000                  | 2015                 | 1990                                                                        | 2000                   | 2015                   |
| Dominican Republic               | 0.00<br>(0.00-0.00)                                                                                       | 1.15<br>(0.18-2.21) | 0.00<br>(0.00-0.00) | 19.77<br>(16.98-22.67)                                                      | 11.25<br>(9.71-12.95)  | 6.80<br>(5.48-8.42)    | 2.60<br>(1.98-3.31)                                                         | 2.21<br>(1.72-2.76)   | 2.26<br>(1.59-3.10)  | 10.25<br>(8.67-12.06)                                                       | 14.48<br>(12.43-16.79) | 16.21<br>(13.27-19.40) |
| Grenada                          | 0.00<br>(0.00-0.00)                                                                                       | 0.00<br>(0.00-0.00) | 0.41<br>(0.07-0.79) | 12.65<br>(9.59-16.19)                                                       | 8.68<br>(6.52-11.33)   | 5.42<br>(4.08-7.03)    | 3.82<br>(2.28-6.04)                                                         | 3.44<br>(2.08-5.20)   | 2.64<br>(1.54-3.92)  | 13.74<br>(10.08-17.93)                                                      | 17.73<br>(13.38-22.91) | 19.49<br>(14.55-24.80) |
| Guyana                           | 0.00<br>(0.00-0.00)                                                                                       | 0.03<br>(0.01-0.06) | 0.00<br>(0.00-0.00) | 20.85<br>(16.44-25.41)                                                      | 15.89<br>(13.58-18.42) | 16.81<br>(13.31-20.73) | 12.16<br>(8.25-16.92)                                                       | 12.09<br>(9.32-15.17) | 7.05<br>(4.66-10.40) | 9.68<br>(7.10-12.83)                                                        | 11.97<br>(8.93-15.51)  | 12.89<br>(9.79-16.26)  |
| Haiti                            | 0.00<br>(0.00-0.00)                                                                                       | 0.87<br>(0.14-1.67) | 0.38<br>(0.06-0.72) | 38.37<br>(34.44-43.11)                                                      | 30.42<br>(26.85-34.45) | 21.43<br>(17.75-25.54) | 7.50<br>(5.60-9.77)                                                         | 7.56<br>(5.76-9.82)   | 6.06<br>(4.14-8.54)  | 8.22<br>(6.38-10.63)                                                        | 6.93<br>(5.66-8.34)    | 8.73<br>(6.66-11.19)   |
| Jamaica                          | 0.00<br>(0.00-0.00)                                                                                       | 0.00<br>(0.00-0.00) | 0.00<br>(0.00-0.00) | 13.38<br>(11.68-15.51)                                                      | 8.42<br>(7.42-9.43)    | 5.81<br>(4.50-7.60)    | 4.36<br>(3.28-5.64)                                                         | 3.41<br>(2.77-4.17)   | 3.48<br>(2.22-5.24)  | 21.25<br>(16.08-26.56)                                                      | 25.88<br>(19.86-32.51) | 27.18<br>(21.01-33.92) |
| Saint Lucia                      | 0.00<br>(0.00-0.00)                                                                                       | 0.00<br>(0.00-0.00) | 0.00<br>(0.00-0.00) | 4.43<br>(3.29-5.78)                                                         | 3.03<br>(2.28-4.11)    | 2.05<br>(1.53-2.68)    | 4.75<br>(2.97-7.28)                                                         | 4.12<br>(2.54-6.10)   | 3.56<br>(2.30-5.34)  | 6.94<br>(5.01-9.32)                                                         | 7.90<br>(5.75-10.39)   | 7.25<br>(5.44-9.45)    |
| Saint Vincent and the Grenadines | 0.00<br>(0.00-0.00)                                                                                       | 0.00<br>(0.00-0.00) | 0.00<br>(0.00-0.00) | 12.96<br>(9.91-16.78)                                                       | 8.70<br>(6.57-11.16)   | 5.24<br>(3.91-6.78)    | 3.87<br>(2.36-5.95)                                                         | 3.37<br>(2.03-5.26)   | 2.52<br>(1.55-3.93)  | 22.61<br>(17.47-28.64)                                                      | 28.81<br>(22.50-35.47) | 32.09<br>(24.99-39.53) |
| Suriname                         | 0.00<br>(0.00-0.00)                                                                                       | 0.00<br>(0.00-0.00) | 0.00<br>(0.00-0.00) | 17.35<br>(13.57-21.98)                                                      | 14.14<br>(11.65-17.05) | 7.02<br>(5.34-8.88)    | 6.87<br>(4.35-10.26)                                                        | 6.47<br>(4.63-8.71)   | 4.56<br>(2.91-6.51)  | 8.19<br>(5.98-10.79)                                                        | 9.17<br>(6.69-12.23)   | 13.08<br>(9.79-17.10)  |
| Trinidad and Tobago              | 0.00<br>(0.00-0.00)                                                                                       | 0.00<br>(0.00-0.00) | 0.00<br>(0.00-0.00) | 6.50<br>(5.10-8.04)                                                         | 6.05<br>(4.75-7.50)    | 3.43<br>(2.49-4.50)    | 5.52<br>(3.70-7.61)                                                         | 5.04<br>(3.48-6.89)   | 3.87<br>(2.38-6.03)  | 7.63<br>(5.77-9.92)                                                         | 10.41<br>(7.76-13.72)  | 13.91<br>(10.48-18.11) |
| Brazil                           | 0.22<br>(0.06-0.50)                                                                                       | 0.16<br>(0.08-0.35) | 0.23<br>(0.06-0.53) | 19.99<br>(18.91-21.13)                                                      | 12.56<br>(11.69-13.45) | 6.69<br>(6.23-7.18)    | 2.73<br>(2.18-3.42)                                                         | 4.72<br>(3.80-5.81)   | 2.57<br>(2.01-3.35)  | 14.28<br>(10.50-18.69)                                                      | 20.29<br>(15.75-25.06) | 32.65<br>(22.12-44.32) |

**Appendix Table 1b. Unscaled values for each SDG health-related indicator by country for 1990, 2000, and 2015**

| Location    | Indicator 1.5.1: Age-standardised death rate due to exposure to forces of nature (per 100,000 population) |                     |                     | Indicator 2.2.1: Prevalence of stunting among children under 5 years of age |                        |                        | Indicator 2.2.2a: Prevalence of wasting among children under 5 years of age |                        |                       | Indicator 2.2.2b: Prevalence of overweight among children aged 2 to 4 years |                        |                        |
|-------------|-----------------------------------------------------------------------------------------------------------|---------------------|---------------------|-----------------------------------------------------------------------------|------------------------|------------------------|-----------------------------------------------------------------------------|------------------------|-----------------------|-----------------------------------------------------------------------------|------------------------|------------------------|
|             | 1990                                                                                                      | 2000                | 2015                | 1990                                                                        | 2000                   | 2015                   | 1990                                                                        | 2000                   | 2015                  | 1990                                                                        | 2000                   | 2015                   |
| Paraguay    | 0.00<br>(0.00-0.00)                                                                                       | 0.66<br>(0.62-0.70) | 0.20<br>(0.19-0.21) | 18.96<br>(16.57-21.59)                                                      | 17.83<br>(14.56-21.59) | 12.40<br>(9.31-16.04)  | 0.89<br>(0.52-1.37)                                                         | 1.24<br>(0.60-2.30)    | 1.38<br>(0.50-2.97)   | 14.75<br>(12.80-17.02)                                                      | 18.11<br>(11.66-26.32) | 20.47<br>(12.99-30.27) |
| China       | 0.13<br>(0.05-0.22)                                                                                       | 0.25<br>(0.10-0.41) | 0.11<br>(0.05-0.18) | 34.58<br>(31.37-37.85)                                                      | 22.45<br>(19.68-25.56) | 9.18<br>(7.65-10.95)   | 4.16<br>(3.30-5.23)                                                         | 2.64<br>(2.01-3.38)    | 2.72<br>(2.02-3.64)   | 18.86<br>(15.77-22.33)                                                      | 19.08<br>(15.37-23.03) | 25.36<br>(18.79-33.81) |
| North Korea | 0.00<br>(0.00-0.00)                                                                                       | 0.25<br>(0.04-0.48) | 0.23<br>(0.04-0.44) | 48.20<br>(28.50-68.23)                                                      | 48.51<br>(39.80-57.13) | 32.44<br>(16.84-50.84) | 6.22<br>(1.59-15.89)                                                        | 11.05<br>(7.79-15.17)  | 5.30<br>(1.60-12.87)  | 5.10<br>(3.16-7.66)                                                         | 5.09<br>(3.24-7.55)    | 4.08<br>(2.60-6.12)    |
| Taiwan      | 0.00<br>(0.00-0.00)                                                                                       | 2.43<br>(0.39-4.65) | 0.00<br>(0.00-0.00) | 0.00<br>(0.00-0.00)                                                         | 0.00<br>(0.00-0.00)    | 0.00<br>(0.00-0.00)    | 0.00<br>(0.00-0.00)                                                         | 0.00<br>(0.00-0.00)    | 0.00<br>(0.00-0.00)   | 30.90<br>(22.18-40.70)                                                      | 34.30<br>(25.50-43.78) | 30.96<br>(22.69-39.91) |
| Cambodia    | 0.00<br>(0.00-0.00)                                                                                       | 0.85<br>(0.32-1.37) | 0.74<br>(0.23-1.26) | 61.30<br>(56.18-66.01)                                                      | 54.73<br>(50.35-58.57) | 36.17<br>(31.80-40.44) | 15.32<br>(10.75-21.33)                                                      | 15.23<br>(12.29-18.51) | 10.15<br>(7.63-13.18) | 3.89<br>(2.33-6.11)                                                         | 5.10<br>(3.94-6.44)    | 4.76<br>(2.97-7.04)    |
| Indonesia   | 0.14<br>(0.03-0.25)                                                                                       | 0.09<br>(0.04-0.13) | 0.00<br>(0.00-0.00) | 53.32<br>(49.49-57.35)                                                      | 40.77<br>(38.83-42.62) | 26.53<br>(22.84-30.37) | 10.92<br>(7.48-15.40)                                                       | 9.05<br>(6.80-11.66)   | 8.76<br>(5.72-12.85)  | 8.11<br>(5.17-12.49)                                                        | 9.87<br>(7.53-12.95)   | 10.29<br>(6.86-14.72)  |
| Laos        | 0.00<br>(0.00-0.00)                                                                                       | 0.21<br>(0.06-0.37) | 0.24<br>(0.10-0.39) | 55.52<br>(51.65-59.43)                                                      | 48.97<br>(45.30-52.58) | 36.30<br>(32.53-40.30) | 13.22<br>(9.54-17.79)                                                       | 14.03<br>(10.36-18.27) | 7.25<br>(4.83-10.24)  | 4.84<br>(2.89-7.39)                                                         | 5.60<br>(3.47-8.65)    | 6.57<br>(4.06-10.28)   |
| Malaysia    | 0.00<br>(0.00-0.00)                                                                                       | 0.40<br>(0.15-0.66) | 0.00<br>(0.00-0.00) | 29.15<br>(25.09-33.34)                                                      | 20.19<br>(18.02-22.42) | 12.60<br>(10.69-14.80) | 14.21<br>(9.54-19.89)                                                       | 12.74<br>(9.32-17.34)  | 10.01<br>(6.52-14.68) | 21.48<br>(13.66-30.27)                                                      | 27.19<br>(18.06-38.38) | 30.52<br>(21.09-40.93) |
| Maldives    | 0.00<br>(0.00-0.00)                                                                                       | 0.00<br>(0.00-0.00) | 0.00<br>(0.00-0.00) | 38.07<br>(33.95-42.33)                                                      | 30.40<br>(27.26-33.67) | 17.96<br>(15.34-20.74) | 13.80<br>(9.97-18.31)                                                       | 15.83<br>(11.85-20.45) | 10.81<br>(7.42-15.35) | 6.21<br>(3.76-9.61)                                                         | 7.32<br>(4.54-11.18)   | 13.45<br>(8.89-18.88)  |
| Mauritius   | 0.00<br>(0.00-0.00)                                                                                       | 0.00<br>(0.00-0.00) | 0.14<br>(0.05-0.26) | 19.99<br>(17.46-22.78)                                                      | 11.97<br>(10.21-13.97) | 7.18<br>(5.86-8.67)    | 14.77<br>(10.25-20.13)                                                      | 12.48<br>(8.58-17.13)  | 9.79<br>(6.39-14.01)  | 21.38<br>(13.79-30.42)                                                      | 24.86<br>(16.70-35.14) | 28.24<br>(19.16-39.98) |

**Appendix Table 1b. Unscaled values for each SDG health-related indicator by country for 1990, 2000, and 2015**

| Location                       | Indicator 1.5.1: Age-standardised death rate due to exposure to forces of nature (per 100,000 population) |                     |                     | Indicator 2.2.1: Prevalence of stunting among children under 5 years of age |                        |                        | Indicator 2.2.2a: Prevalence of wasting among children under 5 years of age |                        |                        | Indicator 2.2.2b: Prevalence of overweight among children aged 2 to 4 years |                        |                        |
|--------------------------------|-----------------------------------------------------------------------------------------------------------|---------------------|---------------------|-----------------------------------------------------------------------------|------------------------|------------------------|-----------------------------------------------------------------------------|------------------------|------------------------|-----------------------------------------------------------------------------|------------------------|------------------------|
|                                | 1990                                                                                                      | 2000                | 2015                | 1990                                                                        | 2000                   | 2015                   | 1990                                                                        | 2000                   | 2015                   | 1990                                                                        | 2000                   | 2015                   |
| Myanmar                        | 0.00<br>(0.00-0.00)                                                                                       | 0.03<br>(0.01-0.06) | 0.14<br>(0.06-0.22) | 57.93<br>(54.51-61.37)                                                      | 46.25<br>(42.90-49.79) | 25.87<br>(22.18-29.79) | 12.14<br>(9.53-15.59)                                                       | 10.43<br>(8.15-12.94)  | 7.30<br>(4.90-10.47)   | 4.36<br>(2.62-6.84)                                                         | 5.35<br>(3.38-8.24)    | 14.41<br>(9.29-20.65)  |
| Philippines                    | 6.30<br>(1.68-10.96)                                                                                      | 0.62<br>(0.17-1.08) | 2.85<br>(0.80-4.90) | 42.17<br>(40.85-43.47)                                                      | 36.56<br>(34.85-38.14) | 26.75<br>(23.30-30.63) | 7.51<br>(6.57-8.54)                                                         | 7.27<br>(6.17-8.53)    | 6.32<br>(4.33-8.96)    | 3.33<br>(1.91-5.60)                                                         | 3.65<br>(2.23-5.81)    | 6.21<br>(3.73-10.00)   |
| Sri Lanka                      | 0.20<br>(0.05-0.37)                                                                                       | 0.14<br>(0.04-0.25) | 0.58<br>(0.34-0.83) | 30.00<br>(27.23-32.65)                                                      | 18.91<br>(17.05-21.08) | 13.40<br>(11.30-15.75) | 15.48<br>(12.63-18.55)                                                      | 15.36<br>(12.73-18.58) | 11.28<br>(7.86-15.42)  | 10.44<br>(6.41-16.18)                                                       | 11.15<br>(6.85-16.78)  | 13.84<br>(8.66-20.37)  |
| Seychelles                     | 0.00<br>(0.00-0.00)                                                                                       | 0.00<br>(0.00-0.00) | 0.00<br>(0.00-0.00) | 7.38<br>(6.19-8.80)                                                         | 5.10<br>(4.18-6.14)    | 3.12<br>(2.53-3.74)    | 3.31<br>(2.19-4.78)                                                         | 3.10<br>(1.94-4.53)    | 2.55<br>(1.60-3.85)    | 11.81<br>(7.23-17.35)                                                       | 12.73<br>(7.97-18.68)  | 13.98<br>(8.67-20.65)  |
| Thailand                       | 0.56<br>(0.16-0.98)                                                                                       | 0.35<br>(0.14-0.57) | 0.29<br>(0.09-0.49) | 23.34<br>(21.10-25.62)                                                      | 16.28<br>(14.19-18.50) | 10.28<br>(8.56-12.28)  | 7.32<br>(5.26-9.86)                                                         | 6.22<br>(4.36-8.65)    | 5.02<br>(3.07-7.29)    | 8.34<br>(5.03-12.89)                                                        | 12.79<br>(7.97-19.06)  | 19.45<br>(12.35-28.37) |
| Timor-Leste                    | 0.00<br>(0.00-0.00)                                                                                       | 0.00<br>(0.00-0.00) | 0.00<br>(0.00-0.00) | 65.65<br>(60.79-70.02)                                                      | 57.53<br>(54.02-60.95) | 45.86<br>(40.75-50.56) | 15.16<br>(10.16-21.21)                                                      | 15.27<br>(11.33-19.98) | 15.09<br>(10.67-20.50) | 6.81<br>(4.00-10.50)                                                        | 6.23<br>(3.92-9.52)    | 9.43<br>(6.02-14.31)   |
| Vietnam                        | 0.30<br>(0.08-0.52)                                                                                       | 1.82<br>(0.54-3.11) | 0.08<br>(0.02-0.13) | 59.92<br>(57.72-61.97)                                                      | 41.84<br>(40.57-43.22) | 21.51<br>(18.53-24.43) | 9.82<br>(8.29-11.55)                                                        | 10.34<br>(9.38-11.35)  | 6.07<br>(4.20-8.44)    | 3.20<br>(1.86-5.07)                                                         | 4.37<br>(2.98-6.17)    | 10.73<br>(6.58-16.55)  |
| Federated States of Micronesia | 0.00<br>(0.00-0.00)                                                                                       | 0.00<br>(0.00-0.00) | 0.00<br>(0.00-0.00) | 13.55<br>(11.49-15.81)                                                      | 11.65<br>(9.76-13.53)  | 8.58<br>(7.13-10.11)   | 4.70<br>(2.94-7.25)                                                         | 3.86<br>(2.36-5.91)    | 3.57<br>(2.14-5.75)    | 23.58<br>(14.35-35.71)                                                      | 22.95<br>(13.81-35.01) | 22.38<br>(13.07-33.26) |
| Fiji                           | 0.00<br>(0.00-0.00)                                                                                       | 1.06<br>(0.86-1.25) | 0.25<br>(0.20-0.30) | 11.28<br>(9.59-13.23)                                                       | 9.44<br>(7.92-11.11)   | 6.93<br>(5.81-8.11)    | 4.49<br>(2.81-6.68)                                                         | 3.58<br>(2.25-5.54)    | 3.41<br>(2.16-5.11)    | 24.19<br>(14.69-35.55)                                                      | 31.86<br>(20.16-44.52) | 31.52<br>(19.58-44.17) |
| Kiribati                       | 0.00<br>(0.00-0.00)                                                                                       | 0.00<br>(0.00-0.00) | 0.00<br>(0.00-0.00) | 33.25<br>(29.77-36.80)                                                      | 28.96<br>(25.26-32.80) | 21.83<br>(18.87-25.01) | 10.53<br>(7.26-15.23)                                                       | 8.83<br>(5.56-13.17)   | 7.50<br>(4.65-11.48)   | 51.60<br>(37.42-65.57)                                                      | 52.58<br>(38.71-66.29) | 54.53<br>(40.71-68.33) |

**Appendix Table 1b. Unscaled values for each SDG health-related indicator by country for 1990, 2000, and 2015**

| Location         | Indicator 1.5.1: Age-standardised death rate due to exposure to forces of nature (per 100,000 population) |                        |                     | Indicator 2.2.1: Prevalence of stunting among children under 5 years of age |                        |                        | Indicator 2.2.2a: Prevalence of wasting among children under 5 years of age |                        |                       | Indicator 2.2.2b: Prevalence of overweight among children aged 2 to 4 years |                        |                        |
|------------------|-----------------------------------------------------------------------------------------------------------|------------------------|---------------------|-----------------------------------------------------------------------------|------------------------|------------------------|-----------------------------------------------------------------------------|------------------------|-----------------------|-----------------------------------------------------------------------------|------------------------|------------------------|
|                  | 1990                                                                                                      | 2000                   | 2015                | 1990                                                                        | 2000                   | 2015                   | 1990                                                                        | 2000                   | 2015                  | 1990                                                                        | 2000                   | 2015                   |
| Marshall Islands | 0.00<br>(0.00-0.00)                                                                                       | 0.00<br>(0.00-0.00)    | 0.00<br>(0.00-0.00) | 17.38<br>(14.86-20.24)                                                      | 15.38<br>(13.32-17.95) | 10.87<br>(9.24-12.86)  | 5.29<br>(3.31-7.86)                                                         | 4.30<br>(2.70-6.50)    | 4.03<br>(2.51-6.18)   | 32.01<br>(20.40-45.57)                                                      | 34.40<br>(23.19-48.29) | 36.83<br>(24.48-50.46) |
| Papua New Guinea | 0.00<br>(0.00-0.00)                                                                                       | 10.36<br>(8.39-12.33)  | 0.19<br>(0.16-0.23) | 47.98<br>(43.81-52.64)                                                      | 43.01<br>(38.84-47.24) | 33.96<br>(30.08-37.86) | 5.68<br>(3.36-8.70)                                                         | 4.91<br>(3.26-7.09)    | 4.42<br>(2.82-6.70)   | 25.44<br>(15.81-37.95)                                                      | 25.12<br>(15.32-36.31) | 19.80<br>(12.03-30.52) |
| Samoa            | 0.00<br>(0.00-0.00)                                                                                       | 0.00<br>(0.00-0.00)    | 1.42<br>(1.18-1.65) | 8.12<br>(6.93-9.66)                                                         | 6.40<br>(5.52-7.36)    | 4.29<br>(3.60-5.10)    | 2.03<br>(1.25-3.11)                                                         | 1.67<br>(1.12-2.37)    | 1.58<br>(0.95-2.48)   | 45.91<br>(31.21-60.53)                                                      | 46.33<br>(32.41-60.52) | 49.30<br>(34.79-63.78) |
| Solomon Islands  | 0.00<br>(0.00-0.00)                                                                                       | 0.00<br>(0.00-0.00)    | 2.31<br>(1.88-2.75) | 33.96<br>(31.18-37.01)                                                      | 32.15<br>(28.63-35.82) | 25.29<br>(22.13-28.63) | 7.18<br>(5.25-9.58)                                                         | 5.00<br>(3.28-7.15)    | 4.27<br>(2.82-6.02)   | 26.54<br>(15.46-38.29)                                                      | 29.63<br>(18.15-44.11) | 36.81<br>(24.23-51.05) |
| Tonga            | 0.00<br>(0.00-0.00)                                                                                       | 0.00<br>(0.00-0.00)    | 0.00<br>(0.00-0.00) | 2.09<br>(1.75-2.47)                                                         | 1.65<br>(1.38-1.95)    | 1.14<br>(0.93-1.36)    | 1.76<br>(1.13-2.53)                                                         | 1.61<br>(0.98-2.52)    | 1.42<br>(0.84-2.18)   | 41.38<br>(28.22-55.88)                                                      | 45.29<br>(32.14-60.27) | 53.00<br>(38.26-66.36) |
| Vanuatu          | 0.00<br>(0.00-0.00)                                                                                       | 18.98<br>(15.37-22.59) | 2.00<br>(1.66-2.34) | 25.89<br>(23.04-29.03)                                                      | 26.07<br>(23.26-29.11) | 21.04<br>(18.07-24.15) | 6.95<br>(4.57-10.21)                                                        | 6.12<br>(4.19-8.47)    | 5.30<br>(3.47-7.94)   | 14.99<br>(8.25-22.99)                                                       | 15.57<br>(9.00-24.29)  | 15.84<br>(8.79-25.07)  |
| Afghanistan      | 0.00<br>(0.00-0.00)                                                                                       | 9.77<br>(3.66-15.86)   | 1.15<br>(0.43-1.87) | 48.61<br>(38.72-58.92)                                                      | 55.30<br>(48.78-61.71) | 46.18<br>(35.41-56.53) | 18.35<br>(12.34-26.94)                                                      | 16.19<br>(13.01-19.40) | 10.57<br>(6.11-16.60) | 13.17<br>(8.88-18.45)                                                       | 7.24<br>(4.63-10.89)   | 9.59<br>(6.10-13.87)   |
| Algeria          | 0.00<br>(0.00-0.00)                                                                                       | 0.02<br>(0.01-0.04)    | 0.04<br>(0.01-0.06) | 20.23<br>(15.92-25.72)                                                      | 22.18<br>(18.29-26.56) | 15.35<br>(10.09-21.97) | 6.90<br>(5.27-8.84)                                                         | 7.70<br>(6.39-9.16)    | 3.20<br>(1.86-5.32)   | 13.34<br>(9.08-18.51)                                                       | 16.64<br>(11.44-22.49) | 28.02<br>(20.94-36.35) |
| Bahrain          | 0.00<br>(0.00-0.00)                                                                                       | 0.00<br>(0.00-0.00)    | 0.00<br>(0.00-0.00) | 14.31<br>(11.07-17.79)                                                      | 11.65<br>(8.02-15.99)  | 7.58<br>(4.91-11.22)   | 6.80<br>(5.52-8.23)                                                         | 6.05<br>(3.76-9.18)    | 4.89<br>(2.77-8.02)   | 45.58<br>(36.50-55.17)                                                      | 46.96<br>(37.75-55.94) | 49.64<br>(40.76-58.90) |
| Egypt            | 0.00<br>(0.00-0.00)                                                                                       | 0.00<br>(0.00-0.00)    | 0.00<br>(0.00-0.00) | 34.70<br>(30.03-39.79)                                                      | 25.59<br>(21.93-29.27) | 21.76<br>(17.13-27.28) | 4.33<br>(3.01-5.90)                                                         | 5.63<br>(4.10-7.47)    | 8.21<br>(5.37-11.83)  | 26.28<br>(22.31-30.33)                                                      | 30.66<br>(26.69-35.22) | 33.68<br>(26.54-41.40) |

**Appendix Table 1b. Unscaled values for each SDG health-related indicator by country for 1990, 2000, and 2015**

| Location  | Indicator 1.5.1: Age-standardised death rate due to exposure to forces of nature (per 100,000 population) |                     |                     | Indicator 2.2.1: Prevalence of stunting among children under 5 years of age |                        |                        | Indicator 2.2.2a: Prevalence of wasting among children under 5 years of age |                      |                      | Indicator 2.2.2b: Prevalence of overweight among children aged 2 to 4 years |                        |                        |
|-----------|-----------------------------------------------------------------------------------------------------------|---------------------|---------------------|-----------------------------------------------------------------------------|------------------------|------------------------|-----------------------------------------------------------------------------|----------------------|----------------------|-----------------------------------------------------------------------------|------------------------|------------------------|
|           | 1990                                                                                                      | 2000                | 2015                | 1990                                                                        | 2000                   | 2015                   | 1990                                                                        | 2000                 | 2015                 | 1990                                                                        | 2000                   | 2015                   |
| Iran      | 84.71<br>(31.77-137.52)                                                                                   | 1.12<br>(0.42-1.83) | 0.11<br>(0.04-0.18) | 27.50<br>(20.31-35.86)                                                      | 14.14<br>(11.14-17.72) | 6.77<br>(4.35-10.17)   | 8.90<br>(5.79-12.88)                                                        | 5.35<br>(4.29-6.72)  | 4.36<br>(2.41-6.87)  | 10.34<br>(7.28-14.32)                                                       | 13.91<br>(9.89-18.86)  | 16.19<br>(11.47-21.64) |
| Iraq      | 0.00<br>(0.00-0.00)                                                                                       | 0.00<br>(0.00-0.00) | 0.04<br>(0.01-0.06) | 27.50<br>(22.35-33.94)                                                      | 30.67<br>(25.24-36.12) | 18.82<br>(13.98-24.98) | 4.50<br>(3.47-5.63)                                                         | 7.22<br>(5.97-8.64)  | 6.29<br>(4.15-9.01)  | 28.11<br>(20.96-36.42)                                                      | 13.45<br>(9.61-18.28)  | 20.95<br>(15.25-27.45) |
| Jordan    | 0.00<br>(0.00-0.00)                                                                                       | 0.00<br>(0.00-0.00) | 0.00<br>(0.00-0.00) | 18.34<br>(13.84-23.74)                                                      | 13.07<br>(9.92-16.94)  | 8.44<br>(5.87-11.80)   | 4.19<br>(2.44-6.67)                                                         | 3.30<br>(2.08-5.03)  | 3.03<br>(1.82-4.70)  | 14.69<br>(11.78-18.13)                                                      | 9.51<br>(7.46-11.77)   | 13.24<br>(10.19-16.84) |
| Kuwait    | 0.00<br>(0.00-0.00)                                                                                       | 0.00<br>(0.00-0.00) | 0.00<br>(0.00-0.00) | 9.46<br>(6.73-12.97)                                                        | 4.29<br>(3.44-5.26)    | 3.49<br>(2.30-5.11)    | 3.40<br>(1.96-5.45)                                                         | 2.14<br>(1.39-3.20)  | 2.09<br>(1.20-3.48)  | 36.80<br>(28.22-45.34)                                                      | 44.28<br>(35.21-53.69) | 48.99<br>(40.53-58.27) |
| Lebanon   | 0.00<br>(0.00-0.00)                                                                                       | 0.00<br>(0.00-0.00) | 0.00<br>(0.00-0.00) | 19.98<br>(14.48-27.31)                                                      | 16.30<br>(12.36-20.75) | 10.70<br>(6.98-15.46)  | 4.58<br>(2.78-7.06)                                                         | 5.17<br>(3.70-7.10)  | 5.04<br>(2.81-8.01)  | 28.15<br>(21.01-36.17)                                                      | 32.92<br>(26.61-39.71) | 29.28<br>(22.28-37.28) |
| Libya     | 0.00<br>(0.00-0.00)                                                                                       | 0.00<br>(0.00-0.00) | 0.06<br>(0.02-0.09) | 27.15<br>(20.20-34.84)                                                      | 24.83<br>(19.06-32.14) | 19.76<br>(13.75-27.28) | 4.83<br>(3.07-7.17)                                                         | 3.49<br>(2.44-4.81)  | 4.97<br>(2.91-7.91)  | 40.49<br>(31.73-49.99)                                                      | 37.32<br>(29.31-45.83) | 38.41<br>(30.09-47.09) |
| Morocco   | 0.00<br>(0.00-0.00)                                                                                       | 0.08<br>(0.03-0.13) | 0.04<br>(0.01-0.06) | 32.13<br>(26.70-37.84)                                                      | 26.27<br>(21.06-32.22) | 18.65<br>(12.62-25.98) | 3.73<br>(3.01-4.57)                                                         | 8.68<br>(6.73-10.99) | 7.76<br>(4.37-12.26) | 20.07<br>(17.50-23.05)                                                      | 20.91<br>(17.24-25.00) | 24.72<br>(18.32-32.21) |
| Palestine | 0.00<br>(0.00-0.00)                                                                                       | 0.03<br>(0.01-0.06) | 0.00<br>(0.00-0.00) | 16.44<br>(11.29-22.88)                                                      | 12.58<br>(8.95-17.02)  | 9.08<br>(6.91-11.61)   | 3.88<br>(2.19-6.55)                                                         | 3.43<br>(2.27-4.89)  | 1.64<br>(1.24-2.13)  | 15.88<br>(11.61-21.39)                                                      | 18.27<br>(13.92-22.97) | 14.94<br>(11.38-19.41) |
| Oman      | 0.00<br>(0.00-0.00)                                                                                       | 0.00<br>(0.00-0.00) | 0.10<br>(0.04-0.16) | 24.88<br>(19.83-30.64)                                                      | 14.68<br>(11.55-18.60) | 9.41<br>(6.27-13.11)   | 10.83<br>(8.44-13.50)                                                       | 7.32<br>(6.14-8.65)  | 6.92<br>(4.25-10.47) | 23.78<br>(17.64-30.68)                                                      | 25.30<br>(18.83-32.53) | 29.12<br>(22.22-37.39) |
| Qatar     | 0.00<br>(0.00-0.00)                                                                                       | 0.00<br>(0.00-0.00) | 0.00<br>(0.00-0.00) | 10.53<br>(6.84-15.35)                                                       | 8.22<br>(5.20-12.23)   | 4.58<br>(2.87-6.72)    | 4.99<br>(2.73-8.59)                                                         | 4.34<br>(2.50-7.17)  | 3.44<br>(1.92-5.70)  | 40.40<br>(31.58-49.19)                                                      | 37.78<br>(28.76-47.53) | 43.37<br>(34.65-52.90) |

**Appendix Table 1b. Unscaled values for each SDG health-related indicator by country for 1990, 2000, and 2015**

| Location             | Indicator 1.5.1: Age-standardised death rate due to exposure to forces of nature (per 100,000 population) |                      |                     | Indicator 2.2.1: Prevalence of stunting among children under 5 years of age |                        |                        | Indicator 2.2.2a: Prevalence of wasting among children under 5 years of age |                        |                        | Indicator 2.2.2b: Prevalence of overweight among children aged 2 to 4 years |                        |                        |
|----------------------|-----------------------------------------------------------------------------------------------------------|----------------------|---------------------|-----------------------------------------------------------------------------|------------------------|------------------------|-----------------------------------------------------------------------------|------------------------|------------------------|-----------------------------------------------------------------------------|------------------------|------------------------|
|                      | 1990                                                                                                      | 2000                 | 2015                | 1990                                                                        | 2000                   | 2015                   | 1990                                                                        | 2000                   | 2015                   | 1990                                                                        | 2000                   | 2015                   |
| Saudi Arabia         | 0.00<br>(0.00-0.00)                                                                                       | 0.00<br>(0.00-0.00)  | 0.07<br>(0.01-0.21) | 23.85<br>(20.84-27.08)                                                      | 15.38<br>(13.20-17.64) | 8.48<br>(7.20-9.89)    | 3.05<br>(2.47-3.77)                                                         | 11.19<br>(9.07-13.78)  | 7.73<br>(6.26-9.57)    | 30.27<br>(22.72-38.97)                                                      | 34.98<br>(27.30-43.64) | 41.11<br>(32.47-50.28) |
| Sudan                | 0.00<br>(0.00-0.00)                                                                                       | 0.33<br>(0.13-0.42)  | 0.05<br>(0.02-0.08) | 42.85<br>(35.55-50.89)                                                      | 45.68<br>(38.70-52.82) | 34.65<br>(28.26-41.24) | 15.05<br>(11.69-18.93)                                                      | 20.04<br>(18.93-21.27) | 17.12<br>(15.32-19.09) | 9.80<br>(6.80-13.85)                                                        | 10.65<br>(7.35-14.84)  | 13.74<br>(9.65-19.27)  |
| Syria                | 0.00<br>(0.00-0.00)                                                                                       | 0.00<br>(0.00-0.00)  | 0.00<br>(0.00-0.00) | 33.77<br>(26.81-41.13)                                                      | 27.90<br>(24.59-31.65) | 22.99<br>(16.87-29.73) | 10.25<br>(7.16-14.03)                                                       | 8.43<br>(7.03-9.94)    | 9.80<br>(6.13-14.53)   | 25.70<br>(19.14-33.69)                                                      | 26.21<br>(19.64-34.04) | 28.14<br>(21.36-36.73) |
| Tunisia              | 0.50<br>(0.19-0.82)                                                                                       | 0.00<br>(0.00-0.00)  | 0.00<br>(0.00-0.00) | 17.77<br>(13.40-22.48)                                                      | 13.13<br>(10.54-16.11) | 7.65<br>(5.33-10.59)   | 5.88<br>(4.17-8.14)                                                         | 3.53<br>(2.59-4.78)    | 2.99<br>(1.87-4.64)    | 13.77<br>(11.11-16.99)                                                      | 17.53<br>(12.75-23.41) | 23.11<br>(16.69-30.40) |
| Turkey               | 0.14<br>(0.05-0.23)                                                                                       | 6.21<br>(2.43-10.17) | 0.18<br>(0.07-0.30) | 24.67<br>(19.02-31.62)                                                      | 17.50<br>(14.12-21.41) | 9.41<br>(6.42-13.25)   | 4.23<br>(2.89-5.78)                                                         | 2.28<br>(1.77-2.89)    | 1.32<br>(0.74-2.08)    | 13.19<br>(9.92-16.80)                                                       | 15.63<br>(12.88-18.71) | 23.14<br>(17.22-29.47) |
| United Arab Emirates | 0.00<br>(0.00-0.00)                                                                                       | 0.00<br>(0.00-0.00)  | 0.00<br>(0.00-0.00) | 24.67<br>(17.87-32.36)                                                      | 18.41<br>(13.25-24.63) | 15.63<br>(10.41-21.85) | 16.51<br>(10.94-23.58)                                                      | 14.19<br>(9.21-20.12)  | 10.93<br>(6.27-17.72)  | 21.03<br>(15.42-27.11)                                                      | 17.70<br>(13.76-21.79) | 21.27<br>(15.16-27.86) |
| Yemen                | 0.00<br>(0.00-0.00)                                                                                       | 0.62<br>(0.23-1.01)  | 0.04<br>(0.01-0.06) | 51.68<br>(45.67-57.83)                                                      | 56.94<br>(51.88-61.89) | 46.78<br>(40.05-53.71) | 15.81<br>(12.54-19.98)                                                      | 14.81<br>(12.24-17.87) | 16.64<br>(13.05-20.98) | 14.31<br>(11.03-18.31)                                                      | 13.22<br>(9.23-18.14)  | 15.96<br>(11.09-22.25) |
| Bangladesh           | 1.03<br>(0.54-1.52)                                                                                       | 0.56<br>(0.29-0.83)  | 0.04<br>(0.02-0.06) | 60.84<br>(57.71-63.97)                                                      | 53.39<br>(51.09-55.49) | 35.87<br>(32.91-38.79) | 18.31<br>(14.87-21.99)                                                      | 14.98<br>(12.64-17.66) | 13.45<br>(10.95-16.44) | 4.73<br>(3.35-6.61)                                                         | 3.42<br>(2.65-4.34)    | 4.04<br>(2.93-5.55)    |
| Bhutan               | 0.00<br>(0.00-0.00)                                                                                       | 8.25<br>(4.32-12.18) | 0.00<br>(0.00-0.00) | 52.10<br>(45.49-58.63)                                                      | 44.15<br>(40.58-47.84) | 29.49<br>(24.92-34.36) | 4.93<br>(3.47-6.89)                                                         | 4.36<br>(3.26-5.60)    | 6.17<br>(4.38-8.25)    | 7.05<br>(4.66-9.82)                                                         | 8.98<br>(6.22-12.40)   | 13.71<br>(9.84-18.74)  |
| India                | 0.26<br>(0.01-0.79)                                                                                       | 0.52<br>(0.17-1.27)  | 0.15<br>(0.04-0.30) | 63.04<br>(61.96-64.08)                                                      | 54.85<br>(53.92-55.83) | 37.50<br>(36.09-38.96) | 19.20<br>(18.31-20.06)                                                      | 16.93<br>(16.26-17.63) | 15.12<br>(14.07-16.25) | 7.97<br>(6.15-10.13)                                                        | 6.95<br>(5.49-8.62)    | 10.63<br>(8.22-13.57)  |

**Appendix Table 1b. Unscaled values for each SDG health-related indicator by country for 1990, 2000, and 2015**

| Location     | Indicator 1.5.1: Age-standardised death rate due to exposure to forces of nature (per 100,000 population) |                     |                      | Indicator 2.2.1: Prevalence of stunting among children under 5 years of age |                        |                        | Indicator 2.2.2a: Prevalence of wasting among children under 5 years of age |                        |                       | Indicator 2.2.2b: Prevalence of overweight among children aged 2 to 4 years |                        |                        |
|--------------|-----------------------------------------------------------------------------------------------------------|---------------------|----------------------|-----------------------------------------------------------------------------|------------------------|------------------------|-----------------------------------------------------------------------------|------------------------|-----------------------|-----------------------------------------------------------------------------|------------------------|------------------------|
|              | 1990                                                                                                      | 2000                | 2015                 | 1990                                                                        | 2000                   | 2015                   | 1990                                                                        | 2000                   | 2015                  | 1990                                                                        | 2000                   | 2015                   |
| Nepal        | 0.19<br>(0.10-0.28)                                                                                       | 1.49<br>(0.78-2.20) | 7.51<br>(3.93-11.09) | 68.03<br>(62.69-72.69)                                                      | 57.93<br>(53.72-62.10) | 37.69<br>(33.53-41.95) | 9.61<br>(7.06-12.52)                                                        | 10.39<br>(8.40-12.64)  | 11.00<br>(8.46-13.79) | 3.67<br>(2.57-5.20)                                                         | 3.51<br>(2.62-4.60)    | 4.78<br>(3.60-6.09)    |
| Pakistan     | 0.00<br>(0.00-0.00)                                                                                       | 0.31<br>(0.16-0.45) | 0.31<br>(0.16-0.46)  | 51.59<br>(48.88-54.51)                                                      | 41.56<br>(38.46-44.87) | 43.11<br>(38.41-47.65) | 17.60<br>(14.76-20.63)                                                      | 14.40<br>(11.38-18.14) | 11.92<br>(9.13-15.76) | 13.29<br>(10.70-16.18)                                                      | 12.37<br>(8.91-16.97)  | 11.45<br>(8.95-14.52)  |
| Botswana     | 0.00<br>(0.00-0.00)                                                                                       | 0.00<br>(0.00-0.00) | 0.13<br>(0.05-0.22)  | 39.98<br>(33.99-45.89)                                                      | 31.48<br>(27.91-35.26) | 23.19<br>(18.67-27.88) | 10.80<br>(5.84-18.21)                                                       | 7.89<br>(5.27-11.13)   | 6.10<br>(3.07-10.84)  | 11.83<br>(7.04-18.72)                                                       | 14.95<br>(9.21-23.47)  | 19.05<br>(12.47-28.82) |
| Lesotho      | 1.60<br>(0.55-2.88)                                                                                       | 0.00<br>(0.00-0.00) | 0.29<br>(0.10-0.51)  | 56.06<br>(50.07-62.24)                                                      | 51.39<br>(47.28-55.61) | 33.50<br>(28.88-37.73) | 6.44<br>(3.37-11.23)                                                        | 6.59<br>(4.70-8.87)    | 3.59<br>(2.33-5.30)   | 13.55<br>(8.51-21.25)                                                       | 15.96<br>(11.44-21.46) | 15.77<br>(10.76-22.68) |
| Namibia      | 0.00<br>(0.00-0.00)                                                                                       | 0.00<br>(0.00-0.00) | 1.12<br>(0.40-1.96)  | 36.03<br>(31.03-40.71)                                                      | 31.12<br>(27.12-35.09) | 23.16<br>(19.79-26.93) | 10.35<br>(6.49-15.68)                                                       | 10.54<br>(7.08-14.60)  | 7.88<br>(4.80-12.19)  | 7.64<br>(5.29-10.90)                                                        | 6.10<br>(4.41-8.24)    | 9.72<br>(7.11-13.25)   |
| South Africa | 0.05<br>(0.02-0.27)                                                                                       | 0.70<br>(0.40-1.02) | 0.35<br>(0.23-0.50)  | 30.47<br>(28.40-32.57)                                                      | 30.14<br>(28.14-32.22) | 20.99<br>(19.38-22.79) | 9.42<br>(7.19-12.31)                                                        | 8.90<br>(6.80-11.32)   | 4.86<br>(3.68-6.25)   | 31.40<br>(22.75-41.64)                                                      | 28.42<br>(21.88-35.47) | 32.06<br>(23.07-43.20) |
| Swaziland    | 0.00<br>(0.00-0.00)                                                                                       | 0.00<br>(0.00-0.00) | 0.20<br>(0.08-0.35)  | 37.47<br>(31.69-43.20)                                                      | 37.38<br>(32.97-42.21) | 28.19<br>(23.58-33.08) | 1.32<br>(0.64-2.31)                                                         | 2.54<br>(1.67-3.66)    | 1.30<br>(0.67-2.34)   | 24.80<br>(16.19-36.17)                                                      | 22.64<br>(15.64-30.65) | 18.29<br>(11.88-26.77) |
| Zimbabwe     | 0.00<br>(0.00-0.00)                                                                                       | 0.20<br>(0.08-0.33) | 0.23<br>(0.10-0.39)  | 30.63<br>(27.59-34.06)                                                      | 33.65<br>(30.50-36.99) | 27.99<br>(24.84-31.19) | 3.72<br>(2.19-5.85)                                                         | 7.72<br>(4.74-12.07)   | 3.47<br>(2.06-5.54)   | 12.75<br>(9.54-16.54)                                                       | 17.46<br>(13.66-21.93) | 10.20<br>(7.77-13.48)  |
| Benin        | 0.00<br>(0.00-0.00)                                                                                       | 0.04<br>(0.02-0.08) | 0.00<br>(0.00-0.00)  | 44.04<br>(37.20-51.43)                                                      | 42.17<br>(37.26-47.01) | 44.50<br>(37.81-50.92) | 12.55<br>(7.63-19.64)                                                       | 10.92<br>(7.97-14.47)  | 12.45<br>(8.12-17.50) | 6.36<br>(4.34-9.19)                                                         | 10.34<br>(7.97-13.34)  | 31.87<br>(24.75-40.07) |
| Burkina Faso | 0.00<br>(0.00-0.00)                                                                                       | 0.00<br>(0.00-0.00) | 0.03<br>(0.01-0.05)  | 42.98<br>(38.34-47.72)                                                      | 45.41<br>(41.96-49.04) | 32.24<br>(26.60-37.91) | 17.87<br>(12.01-25.08)                                                      | 20.23<br>(14.51-27.01) | 15.32<br>(9.90-22.88) | 6.85<br>(5.01-9.14)                                                         | 10.95<br>(8.70-13.51)  | 15.57<br>(10.90-21.01) |

**Appendix Table 1b. Unscaled values for each SDG health-related indicator by country for 1990, 2000, and 2015**

| Location      | Indicator 1.5.1: Age-standardised death rate due to exposure to forces of nature (per 100,000 population) |                     |                     | Indicator 2.2.1: Prevalence of stunting among children under 5 years of age |                        |                        | Indicator 2.2.2a: Prevalence of wasting among children under 5 years of age |                        |                        | Indicator 2.2.2b: Prevalence of overweight among children aged 2 to 4 years |                        |                        |
|---------------|-----------------------------------------------------------------------------------------------------------|---------------------|---------------------|-----------------------------------------------------------------------------|------------------------|------------------------|-----------------------------------------------------------------------------|------------------------|------------------------|-----------------------------------------------------------------------------|------------------------|------------------------|
|               | 1990                                                                                                      | 2000                | 2015                | 1990                                                                        | 2000                   | 2015                   | 1990                                                                        | 2000                   | 2015                   | 1990                                                                        | 2000                   | 2015                   |
| Cameroon      | 0.00<br>(0.00-0.00)                                                                                       | 0.04<br>(0.01-0.07) | 0.03<br>(0.01-0.05) | 37.96<br>(32.59-43.56)                                                      | 37.84<br>(32.96-43.03) | 29.22<br>(24.11-35.07) | 5.70<br>(3.76-8.08)                                                         | 6.94<br>(4.87-9.47)    | 6.02<br>(3.70-9.29)    | 15.52<br>(11.86-20.02)                                                      | 19.36<br>(15.27-24.02) | 21.36<br>(15.88-27.65) |
| Cape Verde    | 0.00<br>(0.00-0.00)                                                                                       | 0.00<br>(0.00-0.00) | 0.00<br>(0.00-0.00) | 22.03<br>(17.75-26.65)                                                      | 17.77<br>(14.24-22.02) | 10.74<br>(8.17-13.98)  | 6.92<br>(4.58-10.16)                                                        | 7.98<br>(5.05-12.20)   | 7.09<br>(4.11-11.22)   | 11.26<br>(7.52-16.69)                                                       | 14.31<br>(9.37-20.12)  | 18.58<br>(13.03-25.67) |
| Chad          | 0.00<br>(0.00-0.00)                                                                                       | 0.00<br>(0.00-0.00) | 0.04<br>(0.01-0.08) | 46.21<br>(39.04-53.26)                                                      | 43.06<br>(38.34-48.09) | 36.04<br>(29.99-42.36) | 16.71<br>(10.65-24.78)                                                      | 16.18<br>(12.19-21.00) | 16.37<br>(10.56-23.10) | 5.96<br>(4.11-8.36)                                                         | 9.06<br>(6.75-11.99)   | 12.75<br>(8.57-17.92)  |
| Cote d'Ivoire | 0.00<br>(0.00-0.00)                                                                                       | 0.05<br>(0.02-0.09) | 0.05<br>(0.02-0.10) | 29.29<br>(24.52-34.66)                                                      | 34.88<br>(29.92-40.42) | 30.51<br>(24.84-36.68) | 9.80<br>(6.87-13.68)                                                        | 8.18<br>(5.73-11.43)   | 8.49<br>(5.32-12.46)   | 12.75<br>(10.35-15.58)                                                      | 12.40<br>(9.54-15.74)  | 12.73<br>(9.51-16.77)  |
| The Gambia    | 0.00<br>(0.00-0.00)                                                                                       | 1.13<br>(0.39-2.16) | 0.00<br>(0.00-0.00) | 33.38<br>(27.61-39.17)                                                      | 27.89<br>(23.91-32.06) | 22.24<br>(18.51-26.07) | 13.38<br>(8.15-20.77)                                                       | 12.62<br>(9.10-17.36)  | 10.50<br>(7.15-14.43)  | 13.96<br>(9.65-19.43)                                                       | 17.55<br>(12.50-23.76) | 13.29<br>(9.23-19.25)  |
| Ghana         | 0.00<br>(0.00-0.00)                                                                                       | 0.07<br>(0.03-0.13) | 0.00<br>(0.00-0.00) | 37.83<br>(33.58-41.90)                                                      | 34.42<br>(30.27-38.78) | 18.79<br>(16.00-22.00) | 9.57<br>(7.51-11.81)                                                        | 10.04<br>(7.96-12.61)  | 5.54<br>(4.01-7.53)    | 5.43<br>(4.05-7.02)                                                         | 9.30<br>(7.29-11.83)   | 9.26<br>(6.82-12.27)   |
| Guinea        | 0.00<br>(0.00-0.00)                                                                                       | 0.00<br>(0.00-0.00) | 0.00<br>(0.00-0.00) | 35.37<br>(30.07-40.94)                                                      | 39.00<br>(35.28-42.86) | 32.11<br>(26.96-37.41) | 12.65<br>(8.46-18.19)                                                       | 10.36<br>(8.03-12.90)  | 10.39<br>(7.13-14.52)  | 11.90<br>(8.10-16.55)                                                       | 11.37<br>(8.91-14.20)  | 13.26<br>(9.01-18.37)  |
| Guinea-Bissau | 0.00<br>(0.00-0.00)                                                                                       | 0.00<br>(0.00-0.00) | 0.00<br>(0.00-0.00) | 39.95<br>(32.90-47.15)                                                      | 38.73<br>(33.99-43.77) | 31.94<br>(26.08-37.71) | 11.41<br>(6.88-17.23)                                                       | 11.29<br>(8.10-15.50)  | 7.08<br>(4.56-10.73)   | 9.43<br>(6.34-13.97)                                                        | 11.88<br>(8.15-16.61)  | 19.83<br>(13.74-26.92) |
| Liberia       | 0.00<br>(0.00-0.00)                                                                                       | 0.11<br>(0.03-0.19) | 0.00<br>(0.00-0.00) | 36.62<br>(30.50-42.62)                                                      | 43.06<br>(37.94-47.84) | 31.71<br>(26.51-36.81) | 9.78<br>(6.22-14.86)                                                        | 8.78<br>(6.30-11.89)   | 6.94<br>(4.74-9.95)    | 19.05<br>(13.18-26.41)                                                      | 14.12<br>(10.29-19.23) | 14.70<br>(10.26-20.57) |
| Mali          | 0.00<br>(0.00-0.00)                                                                                       | 0.06<br>(0.01-0.07) | 0.06<br>(0.02-0.11) | 37.23<br>(31.98-42.55)                                                      | 42.12<br>(37.28-47.18) | 35.12<br>(29.59-41.26) | 15.02<br>(10.47-20.54)                                                      | 15.44<br>(11.92-19.75) | 14.12<br>(9.59-19.98)  | 5.25<br>(3.82-7.25)                                                         | 9.56<br>(7.61-12.01)   | 17.32<br>(11.87-24.44) |

**Appendix Table 1b. Unscaled values for each SDG health-related indicator by country for 1990, 2000, and 2015**

| Location              | Indicator 1.5.1: Age-standardised death rate due to exposure to forces of nature (per 100,000 population) |                     |                     | Indicator 2.2.1: Prevalence of stunting among children under 5 years of age |                        |                        | Indicator 2.2.2a: Prevalence of wasting among children under 5 years of age |                        |                        | Indicator 2.2.2b: Prevalence of overweight among children aged 2 to 4 years |                        |                        |
|-----------------------|-----------------------------------------------------------------------------------------------------------|---------------------|---------------------|-----------------------------------------------------------------------------|------------------------|------------------------|-----------------------------------------------------------------------------|------------------------|------------------------|-----------------------------------------------------------------------------|------------------------|------------------------|
|                       | 1990                                                                                                      | 2000                | 2015                | 1990                                                                        | 2000                   | 2015                   | 1990                                                                        | 2000                   | 2015                   | 1990                                                                        | 2000                   | 2015                   |
| Mauritania            | 0.00<br>(0.00-0.00)                                                                                       | 0.00<br>(0.00-0.00) | 0.00<br>(0.00-0.00) | 56.32<br>(50.91-61.61)                                                      | 39.96<br>(35.12-45.03) | 23.24<br>(18.48-28.59) | 15.85<br>(11.77-21.19)                                                      | 13.73<br>(9.82-19.13)  | 10.63<br>(6.50-15.72)  | 8.86<br>(5.98-12.51)                                                        | 10.06<br>(7.77-12.81)  | 11.64<br>(7.85-17.17)  |
| Niger                 | 0.00<br>(0.00-0.00)                                                                                       | 0.00<br>(0.00-0.00) | 0.23<br>(0.09-0.41) | 47.32<br>(42.47-52.43)                                                      | 52.68<br>(48.35-56.82) | 43.98<br>(38.03-50.10) | 21.87<br>(16.91-27.85)                                                      | 18.05<br>(14.47-21.76) | 17.90<br>(12.84-24.47) | 5.39<br>(3.91-7.38)                                                         | 5.40<br>(3.99-7.16)    | 8.10<br>(5.83-11.02)   |
| Nigeria               | 0.00<br>(0.00-0.00)                                                                                       | 0.04<br>(0.01-0.07) | 0.09<br>(0.03-0.18) | 52.71<br>(47.67-57.59)                                                      | 48.88<br>(45.14-52.46) | 32.54<br>(28.25-37.18) | 15.04<br>(10.99-20.31)                                                      | 13.93<br>(11.04-17.27) | 13.03<br>(9.15-17.66)  | 9.49<br>(7.79-11.50)                                                        | 15.08<br>(11.88-18.95) | 18.37<br>(13.35-24.39) |
| Sao Tome and Principe | 0.00<br>(0.00-0.00)                                                                                       | 0.00<br>(0.00-0.00) | 0.00<br>(0.00-0.00) | 32.29<br>(26.88-37.81)                                                      | 28.66<br>(24.33-33.51) | 18.33<br>(14.25-23.25) | 6.55<br>(4.16-9.71)                                                         | 6.67<br>(4.62-9.28)    | 8.97<br>(5.34-13.72)   | 14.54<br>(10.01-20.60)                                                      | 16.24<br>(11.88-21.52) | 20.12<br>(14.59-26.62) |
| Senegal               | 0.00<br>(0.00-0.00)                                                                                       | 0.47<br>(0.18-0.89) | 0.03<br>(0.01-0.06) | 33.22<br>(28.83-37.51)                                                      | 28.76<br>(24.68-33.24) | 20.27<br>(16.98-24.05) | 7.46<br>(5.75-9.58)                                                         | 10.11<br>(7.80-12.72)  | 7.81<br>(5.79-10.23)   | 7.34<br>(5.71-9.30)                                                         | 6.76<br>(4.81-9.47)    | 6.71<br>(4.68-9.24)    |
| Sierra Leone          | 0.00<br>(0.00-0.00)                                                                                       | 0.43<br>(0.06-0.45) | 0.09<br>(0.03-0.16) | 41.09<br>(37.12-45.12)                                                      | 42.85<br>(38.45-47.54) | 37.47<br>(33.20-42.38) | 9.55<br>(8.06-11.10)                                                        | 13.21<br>(10.64-15.94) | 10.22<br>(7.74-13.30)  | 10.83<br>(7.13-15.71)                                                       | 13.52<br>(9.53-18.69)  | 21.63<br>(15.51-28.70) |
| Togo                  | 0.00<br>(0.00-0.00)                                                                                       | 0.00<br>(0.00-0.00) | 0.00<br>(0.00-0.00) | 39.25<br>(35.77-42.96)                                                      | 34.08<br>(30.37-38.17) | 25.10<br>(21.67-28.78) | 7.16<br>(4.68-10.74)                                                        | 11.61<br>(7.67-16.48)  | 7.08<br>(4.51-10.44)   | 4.88<br>(3.50-6.59)                                                         | 7.72<br>(5.72-10.52)   | 9.25<br>(6.04-13.50)   |
| Burundi               | 0.00<br>(0.00-0.00)                                                                                       | 0.00<br>(0.00-0.00) | 0.25<br>(0.13-0.39) | 54.58<br>(48.05-61.08)                                                      | 59.43<br>(55.81-62.88) | 54.54<br>(45.95-63.19) | 7.22<br>(4.52-10.81)                                                        | 8.34<br>(6.90-10.12)   | 6.87<br>(3.65-11.86)   | 5.32<br>(3.37-7.90)                                                         | 6.71<br>(3.99-10.72)   | 7.12<br>(4.46-10.67)   |
| Comoros               | 0.00<br>(0.00-0.00)                                                                                       | 0.00<br>(0.00-0.00) | 0.00<br>(0.00-0.00) | 42.96<br>(33.33-52.77)                                                      | 52.31<br>(48.56-55.79) | 32.44<br>(26.67-39.13) | 4.66<br>(3.37-6.18)                                                         | 14.67<br>(12.32-17.32) | 13.25<br>(8.60-19.64)  | 19.24<br>(12.10-28.06)                                                      | 26.58<br>(19.11-35.13) | 25.69<br>(16.29-37.25) |
| Djibouti              | 0.00<br>(0.00-0.00)                                                                                       | 0.00<br>(0.00-0.00) | 0.00<br>(0.00-0.00) | 28.64<br>(25.70-31.66)                                                      | 30.12<br>(26.76-33.68) | 27.29<br>(19.42-36.33) | 12.76<br>(10.46-15.31)                                                      | 18.29<br>(14.31-22.58) | 17.13<br>(8.52-29.69)  | 10.31<br>(6.05-16.49)                                                       | 15.89<br>(9.87-23.81)  | 30.48<br>(20.18-41.79) |

**Appendix Table 1b. Unscaled values for each SDG health-related indicator by country for 1990, 2000, and 2015**

| Location    | Indicator 1.5.1: Age-standardised death rate due to exposure to forces of nature (per 100,000 population) |                      |                     | Indicator 2.2.1: Prevalence of stunting among children under 5 years of age |                        |                        | Indicator 2.2.2a: Prevalence of wasting among children under 5 years of age |                        |                        | Indicator 2.2.2b: Prevalence of overweight among children aged 2 to 4 years |                        |                        |
|-------------|-----------------------------------------------------------------------------------------------------------|----------------------|---------------------|-----------------------------------------------------------------------------|------------------------|------------------------|-----------------------------------------------------------------------------|------------------------|------------------------|-----------------------------------------------------------------------------|------------------------|------------------------|
|             | 1990                                                                                                      | 2000                 | 2015                | 1990                                                                        | 2000                   | 2015                   | 1990                                                                        | 2000                   | 2015                   | 1990                                                                        | 2000                   | 2015                   |
| Eritrea     | 0.00<br>(0.00-0.00)                                                                                       | 0.00<br>(0.00-0.00)  | 0.00<br>(0.00-0.00) | 63.65<br>(56.45-70.28)                                                      | 43.86<br>(39.56-48.15) | 42.59<br>(31.97-53.30) | 12.06<br>(7.48-17.85)                                                       | 16.75<br>(12.90-20.74) | 12.66<br>(5.57-23.70)  | 5.07<br>(3.09-7.87)                                                         | 4.69<br>(3.25-6.75)    | 2.59<br>(1.50-4.40)    |
| Ethiopia    | 0.00<br>(0.00-0.00)                                                                                       | 0.13<br>(0.06-0.21)  | 0.00<br>(0.00-0.00) | 58.63<br>(47.63-69.48)                                                      | 57.21<br>(53.91-60.30) | 40.73<br>(32.90-48.44) | 14.01<br>(6.69-24.36)                                                       | 13.47<br>(11.33-15.72) | 11.09<br>(6.42-17.47)  | 4.94<br>(2.85-8.09)                                                         | 5.66<br>(3.88-8.12)    | 9.68<br>(5.76-15.01)   |
| Kenya       | 0.00<br>(0.00-0.00)                                                                                       | 0.10<br>(0.02-0.22)  | 0.14<br>(0.06-0.28) | 42.08<br>(40.41-43.73)                                                      | 39.02<br>(37.92-40.17) | 25.78<br>(24.79-26.77) | 8.06<br>(7.24-8.98)                                                         | 8.51<br>(7.86-9.23)    | 4.21<br>(3.84-4.59)    | 14.51<br>(9.79-20.20)                                                       | 13.14<br>(9.70-17.36)  | 11.70<br>(8.62-15.83)  |
| Madagascar  | 0.00<br>(0.00-0.00)                                                                                       | 0.54<br>(0.32-0.80)  | 0.31<br>(0.19-0.45) | 57.48<br>(51.65-63.40)                                                      | 55.19<br>(51.31-58.81) | 46.28<br>(35.55-56.44) | 14.48<br>(9.07-21.14)                                                       | 13.82<br>(9.68-18.96)  | 18.87<br>(9.14-32.11)  | 8.09<br>(5.59-11.50)                                                        | 7.58<br>(5.48-10.05)   | 10.02<br>(5.89-15.59)  |
| Malawi      | 0.00<br>(0.00-0.00)                                                                                       | 0.00<br>(0.00-0.00)  | 0.39<br>(0.19-0.62) | 56.31<br>(50.80-62.02)                                                      | 55.74<br>(52.23-59.02) | 42.25<br>(36.99-47.58) | 6.74<br>(3.99-10.51)                                                        | 8.24<br>(5.76-11.14)   | 5.50<br>(3.52-8.05)    | 25.40<br>(18.92-32.74)                                                      | 25.77<br>(20.50-31.07) | 16.25<br>(12.11-21.59) |
| Mozambique  | 0.00<br>(0.00-0.00)                                                                                       | 1.25<br>(0.71-1.92)  | 0.20<br>(0.12-0.29) | 59.19<br>(50.44-67.91)                                                      | 49.54<br>(45.50-53.88) | 38.69<br>(30.30-46.99) | 10.32<br>(5.48-17.19)                                                       | 7.63<br>(5.87-9.86)    | 6.47<br>(3.59-10.57)   | 12.84<br>(7.99-19.49)                                                       | 16.88<br>(12.64-21.89) | 19.97<br>(13.86-27.11) |
| Rwanda      | 0.00<br>(0.00-0.00)                                                                                       | 0.00<br>(0.00-0.00)  | 0.03<br>(0.02-0.05) | 55.35<br>(49.01-61.70)                                                      | 49.13<br>(45.32-52.99) | 38.23<br>(32.76-43.56) | 8.67<br>(4.89-14.05)                                                        | 8.48<br>(6.01-11.47)   | 2.89<br>(1.71-4.58)    | 15.68<br>(11.70-20.30)                                                      | 17.07<br>(13.68-20.89) | 24.99<br>(17.42-33.91) |
| Somalia     | 0.00<br>(0.00-0.00)                                                                                       | 8.11<br>(3.95-12.81) | 0.56<br>(0.25-0.76) | 29.69<br>(21.17-39.97)                                                      | 31.50<br>(28.40-34.77) | 38.74<br>(29.53-48.41) | 13.47<br>(6.54-24.50)                                                       | 26.74<br>(22.28-31.32) | 14.13<br>(6.53-26.02)  | 12.21<br>(7.26-18.81)                                                       | 8.97<br>(5.26-13.67)   | 10.61<br>(6.04-16.98)  |
| South Sudan | 0.00<br>(0.00-0.00)                                                                                       | 0.00<br>(0.00-0.00)  | 0.37<br>(0.18-1.16) | 47.48<br>(36.37-58.82)                                                      | 47.51<br>(41.20-53.96) | 31.76<br>(24.60-39.70) | 17.92<br>(8.25-34.17)                                                       | 20.85<br>(15.72-26.63) | 21.69<br>(12.56-34.03) | 18.54<br>(11.13-28.18)                                                      | 18.14<br>(11.59-26.70) | 18.94<br>(11.56-28.82) |
| Tanzania    | 0.89<br>(0.42-1.41)                                                                                       | 0.13<br>(0.08-0.19)  | 0.03<br>(0.01-0.04) | 50.21<br>(45.87-54.75)                                                      | 48.35<br>(44.63-52.22) | 38.03<br>(30.06-47.32) | 9.23<br>(5.71-13.81)                                                        | 5.98<br>(4.15-8.54)    | 5.83<br>(2.99-10.59)   | 15.35<br>(12.24-18.74)                                                      | 12.68<br>(10.36-15.10) | 13.30<br>(8.74-19.02)  |

**Appendix Table 1b. Unscaled values for each SDG health-related indicator by country for 1990, 2000, and 2015**

| Location                         | Indicator 1.5.1: Age-standardised death rate due to exposure to forces of nature (per 100,000 population) |                     |                     | Indicator 2.2.1: Prevalence of stunting among children under 5 years of age |                        |                        | Indicator 2.2.2a: Prevalence of wasting among children under 5 years of age |                        |                      | Indicator 2.2.2b: Prevalence of overweight among children aged 2 to 4 years |                        |                        |
|----------------------------------|-----------------------------------------------------------------------------------------------------------|---------------------|---------------------|-----------------------------------------------------------------------------|------------------------|------------------------|-----------------------------------------------------------------------------|------------------------|----------------------|-----------------------------------------------------------------------------|------------------------|------------------------|
|                                  | 1990                                                                                                      | 2000                | 2015                | 1990                                                                        | 2000                   | 2015                   | 1990                                                                        | 2000                   | 2015                 | 1990                                                                        | 2000                   | 2015                   |
| Uganda                           | 0.00<br>(0.00-0.00)                                                                                       | 0.16<br>(0.07-0.53) | 0.04<br>(0.02-0.06) | 46.99<br>(42.66-50.94)                                                      | 44.99<br>(41.70-48.31) | 31.04<br>(24.68-37.87) | 4.27<br>(2.55-6.97)                                                         | 8.24<br>(5.07-12.21)   | 5.49<br>(2.78-9.54)  | 15.27<br>(12.17-18.90)                                                      | 15.69<br>(12.96-18.70) | 13.00<br>(8.82-18.21)  |
| Zambia                           | 0.00<br>(0.00-0.00)                                                                                       | 0.00<br>(0.00-0.00) | 0.00<br>(0.00-0.00) | 50.54<br>(42.44-58.00)                                                      | 54.70<br>(50.59-58.90) | 40.80<br>(33.65-48.00) | 5.10<br>(2.82-8.26)                                                         | 5.45<br>(3.97-7.31)    | 6.31<br>(3.73-9.85)  | 20.08<br>(14.58-26.89)                                                      | 26.85<br>(22.03-32.16) | 35.62<br>(25.13-46.95) |
| Angola                           | 0.00<br>(0.00-0.00)                                                                                       | 0.09<br>(0.01-0.17) | 0.22<br>(0.03-0.41) | 56.42<br>(48.48-63.37)                                                      | 50.03<br>(44.04-56.10) | 26.31<br>(20.61-32.54) | 7.86<br>(5.06-11.59)                                                        | 9.11<br>(6.57-12.02)   | 6.14<br>(3.96-9.22)  | 10.42<br>(6.80-15.08)                                                       | 14.13<br>(9.42-20.65)  | 28.73<br>(19.65-39.09) |
| Central African Republic         | 0.00<br>(0.00-0.00)                                                                                       | 0.00<br>(0.00-0.00) | 0.00<br>(0.00-0.00) | 45.01<br>(38.15-52.42)                                                      | 44.54<br>(38.30-51.05) | 37.75<br>(30.72-44.46) | 9.39<br>(6.46-12.77)                                                        | 10.94<br>(7.86-14.36)  | 9.08<br>(5.94-12.72) | 16.28<br>(11.36-22.17)                                                      | 15.77<br>(10.94-21.78) | 12.07<br>(7.77-17.56)  |
| Congo                            | 0.00<br>(0.00-0.00)                                                                                       | 0.00<br>(0.00-0.00) | 0.08<br>(0.01-0.15) | 39.13<br>(32.08-46.70)                                                      | 33.97<br>(27.54-40.86) | 23.58<br>(19.08-28.60) | 9.33<br>(5.96-13.49)                                                        | 8.55<br>(5.71-12.04)   | 6.50<br>(4.27-9.32)  | 15.88<br>(10.56-23.19)                                                      | 15.17<br>(10.68-20.86) | 11.91<br>(7.97-16.68)  |
| Democratic Republic of the Congo | 0.00<br>(0.00-0.00)                                                                                       | 0.00<br>(0.00-0.00) | 0.05<br>(0.01-0.10) | 49.05<br>(41.98-56.34)                                                      | 48.28<br>(42.67-54.41) | 39.44<br>(33.49-45.48) | 12.41<br>(8.34-17.66)                                                       | 14.00<br>(10.54-18.67) | 9.04<br>(6.26-12.49) | 27.13<br>(18.75-37.31)                                                      | 20.18<br>(14.10-27.92) | 11.79<br>(7.96-16.86)  |
| Equatorial Guinea                | 0.00<br>(0.00-0.00)                                                                                       | 0.00<br>(0.00-0.00) | 0.00<br>(0.00-0.00) | 55.94<br>(48.36-62.94)                                                      | 40.19<br>(34.42-46.06) | 17.79<br>(13.85-22.45) | 6.81<br>(4.38-10.08)                                                        | 6.01<br>(4.42-7.97)    | 3.57<br>(2.31-5.44)  | 20.79<br>(13.79-29.24)                                                      | 26.43<br>(19.16-35.24) | 44.42<br>(33.29-55.67) |
| Gabon                            | 0.00<br>(0.00-0.00)                                                                                       | 0.00<br>(0.00-0.00) | 0.00<br>(0.00-0.00) | 30.40<br>(23.81-37.47)                                                      | 26.06<br>(21.13-31.16) | 17.60<br>(13.91-22.18) | 5.39<br>(3.42-8.11)                                                         | 4.80<br>(3.32-6.62)    | 4.06<br>(2.68-5.78)  | 13.70<br>(9.10-19.66)                                                       | 15.41<br>(11.55-20.00) | 19.63<br>(14.33-25.81) |

**Appendix Table 1b. Unscaled values for each SDG health-related indicator by country for 1990, 2000, and 2015**

| Location      | Indicator 3.1.1: Maternal mortality ratio (maternal deaths per 100,000 live births) |                        |                        | Indicator 3.1.2: Proportion of births attended by skilled health personnel (doctors, nurses, midwives, or country-specific medical staff [e.g., clinical officers]) |                        |                        | Indicator 3.2.1: Under-5 mortality rate (probability of dying before the age of 5 per 1,000 live births) |                     |                      | Indicator 3.2.2: Neonatal mortality rate (probability of dying during the first 28 days of life per 1,000 live births) |                     |                     |
|---------------|-------------------------------------------------------------------------------------|------------------------|------------------------|---------------------------------------------------------------------------------------------------------------------------------------------------------------------|------------------------|------------------------|----------------------------------------------------------------------------------------------------------|---------------------|----------------------|------------------------------------------------------------------------------------------------------------------------|---------------------|---------------------|
|               | 1990                                                                                | 2000                   | 2015                   | 1990                                                                                                                                                                | 2000                   | 2015                   | 1990                                                                                                     | 2000                | 2015                 | 1990                                                                                                                   | 2000                | 2015                |
| Canada        | 5.80<br>(5.01-6.63)                                                                 | 7.37<br>(6.41-8.45)    | 6.93<br>(5.78-8.31)    | 98.36<br>(97.77-98.81)                                                                                                                                              | 98.85<br>(98.48-99.15) | 99.16<br>(98.87-99.39) | 8.43<br>(8.25-8.59)                                                                                      | 6.15<br>(6.01-6.29) | 5.03<br>(4.72-5.38)  | 4.71<br>(4.48-4.90)                                                                                                    | 3.42<br>(3.24-3.57) | 2.77<br>(2.54-3.02) |
| United States | 16.51<br>(15.77-17.39)                                                              | 17.05<br>(16.21-17.88) | 25.15<br>(23.38-27.12) | 98.33<br>(97.83-98.78)                                                                                                                                              | 98.26<br>(97.76-98.70) | 99.01<br>(98.66-99.28) | 11.33<br>(11.25-11.42)                                                                                   | 8.17<br>(8.11-8.24) | 6.00<br>(5.80-6.21)  | 6.19<br>(5.95-6.40)                                                                                                    | 4.55<br>(4.36-4.70) | 3.32<br>(3.14-3.50) |
| Australia     | 7.37<br>(6.28-8.61)                                                                 | 7.46<br>(6.46-8.58)    | 5.46<br>(4.53-6.53)    | 98.81<br>(98.55-99.02)                                                                                                                                              | 98.98<br>(98.75-99.17) | 99.31<br>(99.15-99.43) | 9.60<br>(9.35-9.85)                                                                                      | 6.26<br>(6.10-6.44) | 3.94<br>(3.73-4.17)  | 5.19<br>(4.87-5.46)                                                                                                    | 3.43<br>(3.22-3.60) | 2.04<br>(1.88-2.20) |
| New Zealand   | 12.44<br>(10.58-14.51)                                                              | 10.09<br>(8.55-11.86)  | 11.82<br>(9.84-14.03)  | 98.72<br>(98.44-98.93)                                                                                                                                              | 98.98<br>(98.76-99.16) | 99.33<br>(99.19-99.45) | 11.07<br>(10.74-11.41)                                                                                   | 7.44<br>(7.18-7.70) | 5.27<br>(4.95-5.63)  | 4.71<br>(4.39-4.96)                                                                                                    | 3.33<br>(3.13-3.51) | 2.32<br>(2.11-2.53) |
| Brunei        | 48.10<br>(37.71-60.42)                                                              | 40.73<br>(33.66-48.45) | 33.25<br>(26.58-41.89) | 98.97<br>(98.87-99.05)                                                                                                                                              | 98.98<br>(98.88-99.06) | 99.08<br>(98.99-99.15) | 10.18<br>(9.54-10.95)                                                                                    | 8.86<br>(8.27-9.49) | 8.90<br>(7.81-10.17) | 3.95<br>(3.54-4.40)                                                                                                    | 3.65<br>(3.27-4.02) | 3.86<br>(3.32-4.43) |
| Japan         | 12.66<br>(12.09-13.27)                                                              | 8.66<br>(8.20-9.20)    | 6.29<br>(5.68-6.76)    | 98.92<br>(98.82-99.00)                                                                                                                                              | 98.98<br>(98.89-99.06) | 99.06<br>(98.98-99.14) | 6.13<br>(6.02-6.24)                                                                                      | 4.60<br>(4.51-4.69) | 2.73<br>(2.50-2.98)  | 2.72<br>(2.52-2.90)                                                                                                    | 1.99<br>(1.85-2.12) | 1.11<br>(0.99-1.24) |
| Singapore     | 10.32<br>(9.01-11.80)                                                               | 11.04<br>(9.70-12.54)  | 4.74<br>(4.02-5.54)    | 98.57<br>(98.44-98.69)                                                                                                                                              | 98.96<br>(98.87-99.04) | 99.19<br>(99.12-99.26) | 7.67<br>(7.31-8.05)                                                                                      | 3.68<br>(3.46-3.91) | 2.17<br>(1.95-2.42)  | 3.98<br>(3.68-4.26)                                                                                                    | 1.76<br>(1.60-1.92) | 1.05<br>(0.94-1.17) |
| South Korea   | 25.42<br>(21.98-28.94)                                                              | 14.97<br>(13.16-17.07) | 11.46<br>(9.48-13.46)  | 98.50<br>(98.38-98.62)                                                                                                                                              | 98.96<br>(98.86-99.04) | 99.19<br>(99.12-99.26) | 12.19<br>(9.27-16.17)                                                                                    | 7.14<br>(6.96-7.32) | 3.22<br>(2.69-3.82)  | 5.47<br>(4.03-7.90)                                                                                                    | 3.30<br>(3.08-3.49) | 1.34<br>(1.09-1.65) |
| Andorra       | 3.63<br>(1.70-5.35)                                                                 | 2.35<br>(0.98-3.71)    | 1.84<br>(0.99-2.90)    | 99.30<br>(99.19-99.40)                                                                                                                                              | 99.37<br>(99.28-99.46) | 99.45<br>(99.36-99.52) | 6.11<br>(5.02-7.37)                                                                                      | 2.93<br>(2.42-3.56) | 1.91<br>(1.55-2.39)  | 3.39<br>(2.69-4.21)                                                                                                    | 1.46<br>(1.19-1.84) | 0.98<br>(0.81-1.23) |
| Austria       | 11.17<br>(9.93-12.51)                                                               | 7.13<br>(6.29-7.96)    | 3.95<br>(3.41-4.54)    | 98.93<br>(98.78-99.08)                                                                                                                                              | 99.14<br>(99.02-99.26) | 99.33<br>(99.24-99.42) | 9.65<br>(9.23-10.10)                                                                                     | 5.66<br>(5.34-5.99) | 3.53<br>(3.12-3.99)  | 5.40<br>(5.11-5.69)                                                                                                    | 3.10<br>(2.87-3.35) | 1.85<br>(1.60-2.16) |

**Appendix Table 1b. Unscaled values for each SDG health-related indicator by country for 1990, 2000, and 2015**

| Location | Indicator 3.1.1: Maternal mortality ratio (maternal deaths per 100,000 live births) |                       |                      | Indicator 3.1.2: Proportion of births attended by skilled health personnel (doctors, nurses, midwives, or country-specific medical staff [e.g., clinical officers]) |                        |                        | Indicator 3.2.1: Under-5 mortality rate (probability of dying before the age of 5 per 1,000 live births) |                     |                     | Indicator 3.2.2: Neonatal mortality rate (probability of dying during the first 28 days of life per 1,000 live births) |                     |                     |
|----------|-------------------------------------------------------------------------------------|-----------------------|----------------------|---------------------------------------------------------------------------------------------------------------------------------------------------------------------|------------------------|------------------------|----------------------------------------------------------------------------------------------------------|---------------------|---------------------|------------------------------------------------------------------------------------------------------------------------|---------------------|---------------------|
|          | 1990                                                                                | 2000                  | 2015                 | 1990                                                                                                                                                                | 2000                   | 2015                   | 1990                                                                                                     | 2000                | 2015                | 1990                                                                                                                   | 2000                | 2015                |
| Belgium  | 13.42<br>(11.85-15.06)                                                              | 9.64<br>(8.52-10.77)  | 6.82<br>(5.82-7.90)  | 98.90<br>(98.74-99.04)                                                                                                                                              | 99.09<br>(98.95-99.21) | 99.26<br>(99.15-99.36) | 10.02<br>(9.80-10.25)                                                                                    | 6.05<br>(5.87-6.22) | 3.81<br>(3.45-4.22) | 5.27<br>(5.04-5.49)                                                                                                    | 3.23<br>(3.05-3.39) | 1.93<br>(1.70-2.19) |
| Cyprus   | 13.03<br>(9.75-16.96)                                                               | 11.70<br>(8.76-15.30) | 5.23<br>(3.91-6.82)  | 98.70<br>(98.50-98.87)                                                                                                                                              | 98.98<br>(98.82-99.12) | 99.16<br>(99.04-99.28) | 13.21<br>(12.57-13.81)                                                                                   | 7.34<br>(6.87-7.83) | 4.78<br>(4.16-5.58) | 7.89<br>(7.36-8.38)                                                                                                    | 4.42<br>(4.12-4.73) | 2.80<br>(2.37-3.32) |
| Denmark  | 9.42<br>(8.12-10.80)                                                                | 5.55<br>(4.72-6.56)   | 4.00<br>(3.34-4.79)  | 99.04<br>(98.89-99.16)                                                                                                                                              | 99.21<br>(99.08-99.32) | 99.31<br>(99.20-99.41) | 9.17<br>(8.74-9.64)                                                                                      | 5.54<br>(5.23-5.85) | 3.55<br>(3.02-4.18) | 5.41<br>(5.07-5.74)                                                                                                    | 3.25<br>(3.02-3.50) | 1.97<br>(1.63-2.39) |
| Finland  | 7.61<br>(6.64-8.87)                                                                 | 7.08<br>(6.14-8.24)   | 3.57<br>(2.99-4.23)  | 98.96<br>(98.79-99.10)                                                                                                                                              | 99.14<br>(99.01-99.25) | 99.34<br>(99.24-99.43) | 6.97<br>(6.52-7.49)                                                                                      | 4.18<br>(3.86-4.53) | 2.40<br>(1.89-3.03) | 4.18<br>(3.83-4.55)                                                                                                    | 2.37<br>(2.13-2.64) | 1.32<br>(1.05-1.69) |
| France   | 16.54<br>(14.43-18.91)                                                              | 11.44<br>(9.91-12.97) | 7.57<br>(6.23-9.10)  | 98.88<br>(98.72-99.04)                                                                                                                                              | 99.08<br>(98.95-99.21) | 99.29<br>(99.19-99.39) | 8.89<br>(8.70-9.08)                                                                                      | 5.47<br>(5.32-5.63) | 3.28<br>(2.59-4.15) | 4.44<br>(4.24-4.62)                                                                                                    | 2.71<br>(2.57-2.84) | 1.53<br>(1.16-2.02) |
| Germany  | 18.33<br>(16.41-20.55)                                                              | 10.64<br>(9.53-11.84) | 8.19<br>(7.11-9.41)  | 98.87<br>(98.70-99.02)                                                                                                                                              | 99.09<br>(98.95-99.22) | 99.27<br>(99.15-99.37) | 9.23<br>(9.04-9.43)                                                                                      | 5.31<br>(5.16-5.46) | 3.53<br>(3.01-4.22) | 4.88<br>(4.64-5.06)                                                                                                    | 2.78<br>(2.65-2.91) | 1.77<br>(1.46-2.20) |
| Greece   | 9.18<br>(8.02-10.47)                                                                | 7.83<br>(6.77-8.87)   | 9.26<br>(7.77-10.74) | 98.59<br>(98.37-98.77)                                                                                                                                              | 98.84<br>(98.65-99.00) | 99.06<br>(98.93-99.19) | 10.48<br>(10.17-10.78)                                                                                   | 6.20<br>(5.98-6.43) | 3.30<br>(3.03-3.61) | 6.32<br>(6.04-6.57)                                                                                                    | 3.84<br>(3.65-4.03) | 1.92<br>(1.74-2.13) |
| Iceland  | 2.79<br>(2.38-3.25)                                                                 | 1.14<br>(0.99-1.32)   | 0.67<br>(0.56-0.79)  | 98.95<br>(98.78-99.09)                                                                                                                                              | 99.10<br>(98.96-99.22) | 99.27<br>(99.16-99.37) | 6.57<br>(5.98-7.25)                                                                                      | 3.97<br>(3.55-4.48) | 2.03<br>(1.72-2.38) | 3.39<br>(2.98-3.81)                                                                                                    | 1.91<br>(1.65-2.22) | 0.95<br>(0.81-1.13) |
| Ireland  | 6.84<br>(5.60-8.30)                                                                 | 4.95<br>(4.14-5.93)   | 4.59<br>(3.59-5.86)  | 98.44<br>(98.19-98.65)                                                                                                                                              | 98.94<br>(98.78-99.10) | 99.24<br>(99.12-99.34) | 9.52<br>(9.06-10.01)                                                                                     | 6.89<br>(6.55-7.26) | 3.51<br>(3.15-3.92) | 5.25<br>(4.93-5.56)                                                                                                    | 3.92<br>(3.66-4.19) | 1.83<br>(1.59-2.09) |
| Israel   | 10.90<br>(9.54-12.41)                                                               | 7.57<br>(6.61-8.52)   | 5.68<br>(4.79-6.63)  | 98.88<br>(98.71-99.04)                                                                                                                                              | 99.09<br>(98.96-99.22) | 99.23<br>(99.12-99.33) | 12.20<br>(11.72-12.66)                                                                                   | 7.34<br>(7.05-7.65) | 3.84<br>(3.50-4.22) | 6.25<br>(5.86-6.59)                                                                                                    | 3.83<br>(3.61-4.06) | 1.85<br>(1.63-2.09) |

**Appendix Table 1b. Unscaled values for each SDG health-related indicator by country for 1990, 2000, and 2015**

| Location       | Indicator 3.1.1: Maternal mortality ratio (maternal deaths per 100,000 live births) |                        |                       | Indicator 3.1.2: Proportion of births attended by skilled health personnel (doctors, nurses, midwives, or country-specific medical staff [e.g., clinical officers]) |                        |                        | Indicator 3.2.1: Under-5 mortality rate (probability of dying before the age of 5 per 1,000 live births) |                     |                     | Indicator 3.2.2: Neonatal mortality rate (probability of dying during the first 28 days of life per 1,000 live births) |                     |                     |
|----------------|-------------------------------------------------------------------------------------|------------------------|-----------------------|---------------------------------------------------------------------------------------------------------------------------------------------------------------------|------------------------|------------------------|----------------------------------------------------------------------------------------------------------|---------------------|---------------------|------------------------------------------------------------------------------------------------------------------------|---------------------|---------------------|
|                | 1990                                                                                | 2000                   | 2015                  | 1990                                                                                                                                                                | 2000                   | 2015                   | 1990                                                                                                     | 2000                | 2015                | 1990                                                                                                                   | 2000                | 2015                |
| Italy          | 9.90<br>(8.75-11.16)                                                                | 6.72<br>(5.87-7.67)    | 4.07<br>(3.46-4.74)   | 98.89<br>(98.71-99.03)                                                                                                                                              | 99.05<br>(98.91-99.18) | 99.17<br>(99.04-99.28) | 9.52<br>(9.30-9.77)                                                                                      | 5.48<br>(5.31-5.64) | 3.13<br>(2.55-3.83) | 6.14<br>(5.89-6.38)                                                                                                    | 3.51<br>(3.34-3.67) | 1.91<br>(1.54-2.39) |
| Luxembourg     | 9.83<br>(8.48-11.43)                                                                | 6.41<br>(5.57-7.41)    | 10.51<br>(8.88-12.33) | 98.68<br>(98.49-98.86)                                                                                                                                              | 99.05<br>(98.90-99.18) | 99.32<br>(99.22-99.41) | 9.12<br>(8.34-9.94)                                                                                      | 4.73<br>(4.29-5.27) | 2.58<br>(2.23-2.99) | 4.43<br>(4.06-4.81)                                                                                                    | 2.22<br>(1.95-2.54) | 1.13<br>(0.97-1.33) |
| Malta          | 10.18<br>(8.78-11.81)                                                               | 10.51<br>(9.13-12.15)  | 5.62<br>(4.82-6.66)   | 97.92<br>(97.60-98.22)                                                                                                                                              | 98.45<br>(98.22-98.68) | 98.89<br>(98.72-99.04) | 9.66<br>(8.93-10.43)                                                                                     | 7.13<br>(6.49-7.80) | 6.25<br>(5.47-7.16) | 6.17<br>(5.71-6.67)                                                                                                    | 4.66<br>(4.19-5.13) | 4.16<br>(3.56-4.84) |
| Netherlands    | 11.73<br>(10.26-13.45)                                                              | 12.79<br>(11.28-14.46) | 6.34<br>(5.45-7.41)   | 98.83<br>(98.66-98.99)                                                                                                                                              | 99.08<br>(98.93-99.20) | 99.29<br>(99.17-99.38) | 8.72<br>(8.43-9.03)                                                                                      | 6.47<br>(6.24-6.71) | 3.91<br>(3.48-4.41) | 5.05<br>(4.74-5.32)                                                                                                    | 3.79<br>(3.56-4.02) | 2.18<br>(1.88-2.53) |
| Norway         | 6.58<br>(5.54-7.71)                                                                 | 5.81<br>(4.92-6.81)    | 3.66<br>(3.04-4.40)   | 99.14<br>(99.02-99.26)                                                                                                                                              | 99.33<br>(99.23-99.42) | 99.45<br>(99.37-99.53) | 8.95<br>(8.54-9.43)                                                                                      | 4.94<br>(4.68-5.23) | 2.71<br>(2.40-3.06) | 4.86<br>(4.54-5.17)                                                                                                    | 2.62<br>(2.41-2.84) | 1.34<br>(1.17-1.53) |
| Portugal       | 18.36<br>(16.25-20.84)                                                              | 12.92<br>(11.41-14.49) | 8.67<br>(7.49-10.01)  | 98.46<br>(98.21-98.67)                                                                                                                                              | 98.86<br>(98.69-99.01) | 99.16<br>(99.04-99.27) | 14.21<br>(13.98-14.44)                                                                                   | 7.17<br>(7.01-7.35) | 2.97<br>(2.78-3.17) | 7.44<br>(7.01-7.80)                                                                                                    | 3.73<br>(3.52-3.92) | 1.39<br>(1.28-1.52) |
| Spain          | 12.16<br>(10.77-13.61)                                                              | 7.29<br>(6.47-8.19)    | 5.35<br>(4.58-6.16)   | 98.42<br>(98.18-98.64)                                                                                                                                              | 98.78<br>(98.60-98.95) | 99.06<br>(98.92-99.19) | 9.41<br>(9.17-9.66)                                                                                      | 5.45<br>(5.27-5.65) | 3.00<br>(2.65-3.40) | 5.16<br>(4.93-5.37)                                                                                                    | 3.00<br>(2.83-3.16) | 1.56<br>(1.35-1.80) |
| Sweden         | 9.76<br>(8.94-10.66)                                                                | 6.07<br>(5.53-6.65)    | 4.07<br>(3.57-4.56)   | 99.02<br>(98.87-99.15)                                                                                                                                              | 99.17<br>(99.04-99.28) | 99.34<br>(99.24-99.43) | 7.15<br>(6.79-7.52)                                                                                      | 3.87<br>(3.63-4.12) | 2.60<br>(2.26-2.99) | 4.27<br>(3.98-4.55)                                                                                                    | 2.14<br>(1.95-2.34) | 1.41<br>(1.23-1.65) |
| Switzerland    | 6.87<br>(5.96-7.85)                                                                 | 7.31<br>(6.37-8.43)    | 5.52<br>(4.66-6.48)   | 99.06<br>(98.93-99.19)                                                                                                                                              | 99.19<br>(99.07-99.30) | 99.33<br>(99.23-99.42) | 8.72<br>(8.37-9.09)                                                                                      | 5.87<br>(5.60-6.14) | 4.05<br>(3.45-4.75) | 5.01<br>(4.71-5.29)                                                                                                    | 3.36<br>(3.13-3.60) | 2.25<br>(1.86-2.74) |
| United Kingdom | 10.59<br>(9.97-11.30)                                                               | 12.98<br>(12.16-13.82) | 8.91<br>(8.24-9.66)   | 98.79<br>(98.59-98.95)                                                                                                                                              | 99.04<br>(98.89-99.18) | 99.24<br>(99.12-99.35) | 9.52<br>(9.35-9.68)                                                                                      | 6.48<br>(6.31-6.66) | 4.69<br>(4.34-5.10) | 5.17<br>(4.97-5.34)                                                                                                    | 3.60<br>(3.44-3.76) | 2.56<br>(2.31-2.83) |

**Appendix Table 1b. Unscaled values for each SDG health-related indicator by country for 1990, 2000, and 2015**

| Location  | Indicator 3.1.1: Maternal mortality ratio (maternal deaths per 100,000 live births) |                        |                        | Indicator 3.1.2: Proportion of births attended by skilled health personnel (doctors, nurses, midwives, or country-specific medical staff [e.g., clinical officers]) |                        |                        | Indicator 3.2.1: Under-5 mortality rate (probability of dying before the age of 5 per 1,000 live births) |                        |                        | Indicator 3.2.2: Neonatal mortality rate (probability of dying during the first 28 days of life per 1,000 live births) |                        |                     |
|-----------|-------------------------------------------------------------------------------------|------------------------|------------------------|---------------------------------------------------------------------------------------------------------------------------------------------------------------------|------------------------|------------------------|----------------------------------------------------------------------------------------------------------|------------------------|------------------------|------------------------------------------------------------------------------------------------------------------------|------------------------|---------------------|
|           | 1990                                                                                | 2000                   | 2015                   | 1990                                                                                                                                                                | 2000                   | 2015                   | 1990                                                                                                     | 2000                   | 2015                   | 1990                                                                                                                   | 2000                   | 2015                |
| Argentina | 64.35<br>(57.17-72.02)                                                              | 53.68<br>(48.36-59.44) | 49.59<br>(43.21-57.82) | 97.49<br>(96.94-97.93)                                                                                                                                              | 98.41<br>(98.13-98.67) | 98.68<br>(98.45-98.90) | 28.27<br>(28.06-28.49)                                                                                   | 19.81<br>(19.64-19.98) | 12.57<br>(12.08-13.10) | 15.15<br>(14.63-15.56)                                                                                                 | 11.23<br>(10.82-11.56) | 6.80<br>(6.40-7.20) |
| Chile     | 51.74<br>(46.44-57.12)                                                              | 23.38<br>(20.72-26.33) | 20.30<br>(17.41-23.66) | 98.71<br>(98.43-98.96)                                                                                                                                              | 98.96<br>(98.75-99.15) | 99.12<br>(98.94-99.29) | 18.85<br>(18.62-19.08)                                                                                   | 10.72<br>(10.56-10.89) | 7.61<br>(7.17-8.08)    | 10.02<br>(9.64-10.29)                                                                                                  | 5.21<br>(5.01-5.37)    | 3.94<br>(3.67-4.21) |
| Uruguay   | 39.38<br>(34.62-44.17)                                                              | 29.50<br>(26.07-33.07) | 21.09<br>(18.06-24.49) | 98.83<br>(98.57-99.05)                                                                                                                                              | 98.98<br>(98.77-99.17) | 99.09<br>(98.90-99.26) | 23.01<br>(22.06-24.02)                                                                                   | 15.92<br>(15.16-16.67) | 9.58<br>(7.35-12.43)   | 12.08<br>(11.59-12.57)                                                                                                 | 8.40<br>(7.91-8.93)    | 4.89<br>(3.79-6.35) |
| Belarus   | 37.39<br>(32.41-42.97)                                                              | 40.63<br>(34.94-47.07) | 7.87<br>(6.03-10.02)   | 99.03<br>(98.90-99.15)                                                                                                                                              | 98.88<br>(98.74-99.01) | 99.25<br>(99.15-99.34) | 20.68<br>(17.40-24.42)                                                                                   | 15.46<br>(12.85-18.37) | 5.70<br>(4.34-7.65)    | 10.81<br>(8.92-12.72)                                                                                                  | 8.12<br>(6.35-10.02)   | 2.91<br>(2.11-4.00) |
| Estonia   | 39.90<br>(34.88-45.30)                                                              | 23.26<br>(20.36-26.52) | 4.58<br>(3.76-5.52)    | 98.99<br>(98.86-99.10)                                                                                                                                              | 98.99<br>(98.86-99.11) | 99.31<br>(99.22-99.39) | 17.46<br>(16.37-18.53)                                                                                   | 11.68<br>(10.66-12.73) | 3.30<br>(2.53-4.26)    | 8.98<br>(8.19-9.70)                                                                                                    | 5.62<br>(5.01-6.32)    | 1.46<br>(1.07-2.01) |
| Latvia    | 47.37<br>(41.58-53.72)                                                              | 26.12<br>(22.87-29.74) | 12.51<br>(10.49-14.72) | 99.06<br>(98.94-99.17)                                                                                                                                              | 98.96<br>(98.82-99.08) | 99.30<br>(99.21-99.39) | 17.97<br>(16.93-19.00)                                                                                   | 13.25<br>(12.25-14.42) | 5.20<br>(3.60-7.29)    | 9.46<br>(8.68-10.22)                                                                                                   | 6.70<br>(5.94-7.51)    | 2.57<br>(1.64-3.80) |
| Lithuania | 31.77<br>(28.08-35.70)                                                              | 15.40<br>(13.42-17.50) | 9.82<br>(8.32-11.39)   | 99.04<br>(98.91-99.16)                                                                                                                                              | 98.96<br>(98.82-99.09) | 99.30<br>(99.21-99.39) | 14.03<br>(13.43-14.67)                                                                                   | 11.12<br>(10.50-11.73) | 4.07<br>(3.44-4.89)    | 6.68<br>(6.17-7.20)                                                                                                    | 5.15<br>(4.76-5.56)    | 1.80<br>(1.44-2.26) |
| Moldova   | 47.82<br>(42.48-53.57)                                                              | 30.31<br>(26.56-34.52) | 14.31<br>(11.99-17.05) | 99.13<br>(99.02-99.23)                                                                                                                                              | 98.88<br>(98.74-99.02) | 99.21<br>(99.10-99.31) | 30.13<br>(25.49-35.29)                                                                                   | 31.80<br>(26.94-37.90) | 10.68<br>(7.16-15.38)  | 14.90<br>(12.86-17.01)                                                                                                 | 16.02<br>(13.99-18.32) | 5.43<br>(3.66-8.21) |
| Russia    | 56.26<br>(50.25-62.48)                                                              | 49.29<br>(44.12-55.11) | 18.55<br>(15.93-21.71) | 99.08<br>(98.96-99.19)                                                                                                                                              | 98.96<br>(98.83-99.09) | 99.26<br>(99.16-99.35) | 21.04<br>(20.93-21.14)                                                                                   | 19.67<br>(19.40-19.97) | 8.75<br>(8.57-8.94)    | 11.03<br>(10.44-11.51)                                                                                                 | 10.38<br>(9.83-10.80)  | 4.43<br>(4.18-4.64) |
| Ukraine   | 49.48<br>(44.04-54.94)                                                              | 53.32<br>(47.55-59.85) | 23.94<br>(19.79-28.37) | 99.17<br>(99.06-99.27)                                                                                                                                              | 98.94<br>(98.81-99.07) | 99.16<br>(99.05-99.26) | 21.49<br>(17.89-25.39)                                                                                   | 21.47<br>(17.27-26.41) | 9.60<br>(6.09-14.43)   | 11.21<br>(9.24-13.22)                                                                                                  | 11.64<br>(9.27-14.07)  | 4.89<br>(3.06-7.60) |

**Appendix Table 1b. Unscaled values for each SDG health-related indicator by country for 1990, 2000, and 2015**

| Location               | Indicator 3.1.1: Maternal mortality ratio (maternal deaths per 100,000 live births) |                        |                        | Indicator 3.1.2: Proportion of births attended by skilled health personnel (doctors, nurses, midwives, or country-specific medical staff [e.g., clinical officers]) |                        |                        | Indicator 3.2.1: Under-5 mortality rate (probability of dying before the age of 5 per 1,000 live births) |                        |                       | Indicator 3.2.2: Neonatal mortality rate (probability of dying during the first 28 days of life per 1,000 live births) |                        |                     |
|------------------------|-------------------------------------------------------------------------------------|------------------------|------------------------|---------------------------------------------------------------------------------------------------------------------------------------------------------------------|------------------------|------------------------|----------------------------------------------------------------------------------------------------------|------------------------|-----------------------|------------------------------------------------------------------------------------------------------------------------|------------------------|---------------------|
|                        | 1990                                                                                | 2000                   | 2015                   | 1990                                                                                                                                                                | 2000                   | 2015                   | 1990                                                                                                     | 2000                   | 2015                  | 1990                                                                                                                   | 2000                   | 2015                |
| Albania                | 28.41<br>(22.88-35.09)                                                              | 15.21<br>(12.43-18.47) | 9.05<br>(6.38-12.36)   | 98.10<br>(97.83-98.34)                                                                                                                                              | 98.15<br>(97.90-98.38) | 98.88<br>(98.73-99.03) | 41.30<br>(37.08-46.19)                                                                                   | 26.74<br>(23.02-31.27) | 12.15<br>(8.48-17.15) | 9.12<br>(8.32-9.83)                                                                                                    | 7.25<br>(6.34-8.16)    | 3.31<br>(2.28-5.02) |
| Bosnia and Herzegovina | 34.94<br>(28.23-43.61)                                                              | 25.76<br>(19.31-33.81) | 12.21<br>(9.31-16.03)  | 97.84<br>(97.54-98.14)                                                                                                                                              | 98.86<br>(98.70-99.00) | 99.15<br>(99.03-99.26) | 18.29<br>(17.57-19.05)                                                                                   | 10.86<br>(10.33-11.41) | 5.39<br>(4.64-6.24)   | 10.05<br>(9.58-10.51)                                                                                                  | 5.64<br>(5.32-5.98)    | 2.89<br>(2.42-3.42) |
| Bulgaria               | 42.46<br>(38.33-47.20)                                                              | 48.23<br>(43.03-53.71) | 18.84<br>(16.17-21.81) | 99.00<br>(98.87-99.13)                                                                                                                                              | 98.94<br>(98.78-99.08) | 99.20<br>(99.08-99.31) | 18.21<br>(17.53-18.92)                                                                                   | 17.69<br>(16.89-18.55) | 8.72<br>(6.22-12.09)  | 9.08<br>(8.58-9.60)                                                                                                    | 8.97<br>(8.44-9.55)    | 4.21<br>(2.95-5.78) |
| Croatia                | 15.12<br>(13.27-17.20)                                                              | 13.13<br>(11.60-14.81) | 8.61<br>(7.49-9.79)    | 99.02<br>(98.88-99.15)                                                                                                                                              | 98.97<br>(98.82-99.10) | 99.14<br>(99.02-99.26) | 12.07<br>(11.56-12.62)                                                                                   | 8.63<br>(8.22-9.05)    | 4.40<br>(3.87-5.00)   | 7.45<br>(6.99-7.90)                                                                                                    | 5.44<br>(5.13-5.74)    | 2.70<br>(2.31-3.14) |
| Czech Republic         | 16.55<br>(14.68-18.55)                                                              | 9.24<br>(8.20-10.38)   | 5.87<br>(4.93-6.87)    | 99.00<br>(98.85-99.14)                                                                                                                                              | 99.00<br>(98.85-99.14) | 99.15<br>(99.03-99.26) | 11.95<br>(11.45-12.46)                                                                                   | 5.35<br>(5.01-5.72)    | 2.49<br>(2.12-2.93)   | 6.49<br>(6.09-6.86)                                                                                                    | 2.89<br>(2.66-3.14)    | 1.23<br>(1.04-1.45) |
| Hungary                | 18.58<br>(16.29-21.30)                                                              | 10.92<br>(9.58-12.45)  | 9.60<br>(8.22-11.28)   | 98.98<br>(98.83-99.12)                                                                                                                                              | 98.98<br>(98.84-99.13) | 99.15<br>(99.01-99.27) | 16.95<br>(16.31-17.58)                                                                                   | 10.41<br>(9.93-10.94)  | 4.94<br>(3.51-6.87)   | 11.11<br>(10.56-11.66)                                                                                                 | 6.42<br>(6.07-6.78)    | 3.05<br>(2.05-4.39) |
| Macedonia              | 16.25<br>(13.17-19.84)                                                              | 13.91<br>(11.96-16.23) | 8.02<br>(6.48-9.86)    | 95.24<br>(94.60-95.84)                                                                                                                                              | 97.84<br>(97.55-98.14) | 98.77<br>(98.58-98.94) | 34.68<br>(33.13-36.35)                                                                                   | 15.39<br>(14.38-16.49) | 9.57<br>(6.38-13.95)  | 20.14<br>(19.38-20.95)                                                                                                 | 9.52<br>(8.74-10.32)   | 5.82<br>(3.86-8.74) |
| Montenegro             | 11.06<br>(8.23-14.64)                                                               | 13.67<br>(10.28-17.76) | 5.28<br>(3.72-7.33)    | 99.00<br>(98.86-99.12)                                                                                                                                              | 98.87<br>(98.72-99.02) | 99.13<br>(99.00-99.24) | 19.11<br>(13.85-25.43)                                                                                   | 20.07<br>(17.99-22.37) | 5.18<br>(3.78-7.01)   | 11.21<br>(7.79-14.79)                                                                                                  | 12.15<br>(10.86-13.45) | 2.91<br>(1.99-4.10) |
| Poland                 | 32.11<br>(29.04-35.44)                                                              | 12.30<br>(11.01-13.67) | 3.99<br>(3.42-4.63)    | 98.94<br>(98.78-99.08)                                                                                                                                              | 99.01<br>(98.88-99.14) | 99.26<br>(99.15-99.36) | 17.77<br>(17.47-18.11)                                                                                   | 9.37<br>(9.10-9.65)    | 4.50<br>(3.18-6.29)   | 11.50<br>(11.09-11.84)                                                                                                 | 5.74<br>(5.51-5.95)    | 2.69<br>(1.80-3.91) |
| Romania                | 106.11<br>(96.19-116.83)                                                            | 38.95<br>(34.64-43.81) | 18.54<br>(15.50-21.95) | 98.91<br>(98.76-99.05)                                                                                                                                              | 98.64<br>(98.45-98.82) | 98.93<br>(98.75-99.08) | 33.03<br>(32.47-33.60)                                                                                   | 23.09<br>(22.52-23.69) | 8.34<br>(6.31-10.95)  | 13.70<br>(13.27-14.07)                                                                                                 | 10.59<br>(10.19-10.94) | 3.62<br>(2.71-4.65) |

**Appendix Table 1b. Unscaled values for each SDG health-related indicator by country for 1990, 2000, and 2015**

| Location   | Indicator 3.1.1: Maternal mortality ratio (maternal deaths per 100,000 live births) |                           |                        | Indicator 3.1.2: Proportion of births attended by skilled health personnel (doctors, nurses, midwives, or country-specific medical staff [e.g., clinical officers]) |                        |                        | Indicator 3.2.1: Under-5 mortality rate (probability of dying before the age of 5 per 1,000 live births) |                        |                        | Indicator 3.2.2: Neonatal mortality rate (probability of dying during the first 28 days of life per 1,000 live births) |                        |                        |
|------------|-------------------------------------------------------------------------------------|---------------------------|------------------------|---------------------------------------------------------------------------------------------------------------------------------------------------------------------|------------------------|------------------------|----------------------------------------------------------------------------------------------------------|------------------------|------------------------|------------------------------------------------------------------------------------------------------------------------|------------------------|------------------------|
|            | 1990                                                                                | 2000                      | 2015                   | 1990                                                                                                                                                                | 2000                   | 2015                   | 1990                                                                                                     | 2000                   | 2015                   | 1990                                                                                                                   | 2000                   | 2015                   |
| Serbia     | 20.18<br>(14.37-29.60)                                                              | 12.02<br>(10.26-14.28)    | 10.55<br>(8.82-12.70)  | 98.84<br>(98.67-98.99)                                                                                                                                              | 98.71<br>(98.53-98.87) | 99.02<br>(98.88-99.15) | 23.99<br>(20.54-27.88)                                                                                   | 12.86<br>(11.70-14.14) | 7.72<br>(6.98-8.54)    | 13.36<br>(11.55-15.25)                                                                                                 | 6.82<br>(6.07-7.71)    | 4.30<br>(3.87-4.77)    |
| Slovakia   | 15.58<br>(12.80-18.63)                                                              | 12.15<br>(10.46-14.04)    | 6.14<br>(5.08-7.32)    | 98.99<br>(98.85-99.13)                                                                                                                                              | 98.99<br>(98.84-99.12) | 99.22<br>(99.11-99.32) | 14.17<br>(13.46-14.88)                                                                                   | 9.69<br>(9.11-10.32)   | 5.99<br>(5.01-7.16)    | 7.23<br>(6.71-7.72)                                                                                                    | 4.84<br>(4.57-5.12)    | 3.09<br>(2.51-3.76)    |
| Slovenia   | 10.14<br>(8.77-11.79)                                                               | 10.13<br>(8.92-11.62)     | 5.31<br>(4.38-6.24)    | 99.00<br>(98.85-99.14)                                                                                                                                              | 99.00<br>(98.85-99.13) | 99.14<br>(99.02-99.26) | 10.06<br>(9.44-10.69)                                                                                    | 5.39<br>(4.99-5.83)    | 2.64<br>(2.29-3.04)    | 5.71<br>(5.29-6.15)                                                                                                    | 3.07<br>(2.79-3.37)    | 1.40<br>(1.20-1.64)    |
| Armenia    | 49.53<br>(42.44-57.61)                                                              | 45.71<br>(38.76-53.14)    | 24.03<br>(19.09-29.65) | 97.34<br>(95.70-98.42)                                                                                                                                              | 97.86<br>(97.14-98.45) | 99.30<br>(98.90-99.58) | 47.26<br>(43.22-51.75)                                                                                   | 31.14<br>(27.68-35.02) | 14.95<br>(11.62-18.98) | 20.42<br>(18.77-22.16)                                                                                                 | 15.58<br>(13.96-17.27) | 7.82<br>(5.61-10.45)   |
| Azerbaijan | 38.98<br>(33.24-45.35)                                                              | 47.57<br>(40.17-55.65)    | 19.71<br>(14.71-25.30) | 92.06<br>(87.64-95.07)                                                                                                                                              | 88.93<br>(87.43-90.30) | 95.00<br>(92.49-96.90) | 80.97<br>(72.71-89.61)                                                                                   | 64.64<br>(57.82-72.43) | 29.71<br>(23.10-37.70) | 30.72<br>(27.87-33.53)                                                                                                 | 27.03<br>(24.74-29.52) | 15.85<br>(12.79-19.17) |
| Georgia    | 41.18<br>(34.12-48.27)                                                              | 30.62<br>(25.55-36.57)    | 41.79<br>(34.18-51.22) | 97.41<br>(95.94-98.37)                                                                                                                                              | 97.62<br>(97.02-98.11) | 99.20<br>(98.91-99.43) | 41.38<br>(37.75-45.46)                                                                                   | 36.21<br>(32.55-40.36) | 17.39<br>(13.91-21.52) | 19.28<br>(17.71-20.97)                                                                                                 | 18.05<br>(16.40-19.78) | 9.57<br>(7.31-12.16)   |
| Kazakhstan | 63.17<br>(56.41-70.29)                                                              | 61.13<br>(54.38-68.22)    | 26.24<br>(21.77-31.72) | 98.90<br>(98.35-99.32)                                                                                                                                              | 98.89<br>(98.48-99.20) | 99.34<br>(98.98-99.59) | 39.12<br>(35.79-42.21)                                                                                   | 35.79<br>(31.29-41.03) | 17.33<br>(13.42-22.06) | 17.75<br>(16.24-19.13)                                                                                                 | 17.17<br>(15.29-19.18) | 9.18<br>(6.60-12.08)   |
| Kyrgyzstan | 66.21<br>(56.51-76.57)                                                              | 63.91<br>(55.17-73.80)    | 47.68<br>(38.78-56.75) | 98.51<br>(97.60-99.09)                                                                                                                                              | 98.30<br>(97.51-98.87) | 99.03<br>(98.53-99.40) | 65.04<br>(62.09-67.93)                                                                                   | 49.62<br>(47.26-52.19) | 28.96<br>(25.73-32.53) | 29.56<br>(27.60-31.38)                                                                                                 | 24.94<br>(23.45-26.37) | 17.00<br>(15.17-18.89) |
| Mongolia   | 171.07<br>(140.58-201.99)                                                           | 175.41<br>(148.75-205.99) | 57.93<br>(44.57-72.97) | 96.81<br>(95.45-97.85)                                                                                                                                              | 98.24<br>(97.84-98.59) | 99.31<br>(98.95-99.58) | 89.35<br>(83.63-95.66)                                                                                   | 59.51<br>(54.10-65.01) | 28.09<br>(22.56-35.61) | 29.61<br>(26.92-32.13)                                                                                                 | 23.48<br>(21.32-25.56) | 14.34<br>(11.73-17.33) |
| Tajikistan | 71.09<br>(61.23-81.49)                                                              | 56.38<br>(48.01-65.99)    | 25.44<br>(19.59-32.50) | 92.55<br>(87.93-95.72)                                                                                                                                              | 90.78<br>(87.05-93.67) | 94.04<br>(91.49-96.18) | 90.93<br>(83.11-98.91)                                                                                   | 70.21<br>(63.79-77.09) | 32.84<br>(26.33-40.53) | 28.91<br>(26.22-31.50)                                                                                                 | 24.95<br>(22.80-27.27) | 15.40<br>(12.88-18.09) |

**Appendix Table 1b. Unscaled values for each SDG health-related indicator by country for 1990, 2000, and 2015**

| Location     | Indicator 3.1.1: Maternal mortality ratio (maternal deaths per 100,000 live births) |                          |                          | Indicator 3.1.2: Proportion of births attended by skilled health personnel (doctors, nurses, midwives, or country-specific medical staff [e.g., clinical officers]) |                        |                        | Indicator 3.2.1: Under-5 mortality rate (probability of dying before the age of 5 per 1,000 live births) |                        |                        | Indicator 3.2.2: Neonatal mortality rate (probability of dying during the first 28 days of life per 1,000 live births) |                        |                        |
|--------------|-------------------------------------------------------------------------------------|--------------------------|--------------------------|---------------------------------------------------------------------------------------------------------------------------------------------------------------------|------------------------|------------------------|----------------------------------------------------------------------------------------------------------|------------------------|------------------------|------------------------------------------------------------------------------------------------------------------------|------------------------|------------------------|
|              | 1990                                                                                | 2000                     | 2015                     | 1990                                                                                                                                                                | 2000                   | 2015                   | 1990                                                                                                     | 2000                   | 2015                   | 1990                                                                                                                   | 2000                   | 2015                   |
| Turkmenistan | 61.38<br>(53.16-70.20)                                                              | 69.16<br>(56.66-82.97)   | 19.24<br>(15.50-23.59)   | 96.22<br>(93.96-97.87)                                                                                                                                              | 97.07<br>(95.60-98.15) | 99.04<br>(98.30-99.48) | 93.85<br>(81.02-107.14)                                                                                  | 77.14<br>(61.09-96.55) | 39.61<br>(29.39-52.32) | 32.16<br>(28.35-36.27)                                                                                                 | 29.27<br>(24.63-34.75) | 19.18<br>(15.15-23.62) |
| Uzbekistan   | 51.56<br>(44.56-59.53)                                                              | 47.57<br>(40.60-56.97)   | 26.11<br>(20.07-32.73)   | 97.79<br>(96.66-98.63)                                                                                                                                              | 98.20<br>(97.45-98.81) | 99.32<br>(98.86-99.63) | 49.61<br>(44.62-55.24)                                                                                   | 42.89<br>(37.27-49.35) | 24.20<br>(18.78-30.77) | 20.75<br>(18.71-22.83)                                                                                                 | 19.33<br>(17.07-21.65) | 12.78<br>(9.94-15.86)  |
| Colombia     | 102.01<br>(88.15-119.00)                                                            | 82.45<br>(74.68-90.75)   | 53.26<br>(45.55-60.94)   | 82.48<br>(80.88-84.23)                                                                                                                                              | 88.51<br>(87.37-89.65) | 97.30<br>(95.99-98.24) | 32.09<br>(29.97-34.27)                                                                                   | 23.86<br>(21.84-26.10) | 15.81<br>(11.79-21.03) | 12.72<br>(11.79-13.54)                                                                                                 | 10.40<br>(9.52-11.39)  | 7.11<br>(4.90-9.75)    |
| Costa Rica   | 29.33<br>(25.73-32.97)                                                              | 34.68<br>(30.59-39.25)   | 24.14<br>(20.47-27.98)   | 98.52<br>(97.68-99.11)                                                                                                                                              | 98.28<br>(96.96-99.16) | 99.28<br>(98.67-99.67) | 20.24<br>(17.63-23.08)                                                                                   | 15.64<br>(13.11-18.85) | 9.75<br>(7.13-13.22)   | 11.11<br>(9.55-12.65)                                                                                                  | 8.44<br>(6.73-10.59)   | 5.16<br>(3.79-7.12)    |
| El Salvador  | 139.43<br>(120.46-161.02)                                                           | 51.58<br>(43.66-61.08)   | 38.18<br>(29.07-49.21)   | 97.56<br>(96.60-98.28)                                                                                                                                              | 99.07<br>(98.67-99.36) | 99.56<br>(99.14-99.80) | 52.90<br>(47.93-59.01)                                                                                   | 29.15<br>(25.21-33.28) | 11.27<br>(7.99-15.71)  | 19.60<br>(17.61-21.66)                                                                                                 | 13.33<br>(11.67-15.10) | 5.14<br>(3.60-7.67)    |
| Guatemala    | 145.81<br>(128.73-165.95)                                                           | 106.28<br>(95.25-118.28) | 72.85<br>(51.75-94.59)   | 32.63<br>(29.96-35.17)                                                                                                                                              | 46.55<br>(43.88-49.34) | 66.08<br>(54.15-76.84) | 80.94<br>(77.70-84.08)                                                                                   | 51.35<br>(48.23-54.80) | 25.97<br>(21.21-31.77) | 17.08<br>(15.61-18.42)                                                                                                 | 13.39<br>(12.35-14.42) | 8.96<br>(7.48-10.64)   |
| Honduras     | 171.64<br>(145.73-198.36)                                                           | 119.67<br>(86.81-161.13) | 108.76<br>(69.32-160.71) | 47.70<br>(39.19-55.80)                                                                                                                                              | 68.32<br>(61.16-74.65) | 96.86<br>(95.02-98.12) | 54.54<br>(52.22-57.03)                                                                                   | 36.26<br>(34.43-38.20) | 22.20<br>(18.87-26.53) | 21.39<br>(19.92-22.80)                                                                                                 | 16.57<br>(15.49-17.66) | 11.56<br>(9.61-13.58)  |
| Mexico       | 72.81<br>(68.99-77.20)                                                              | 60.64<br>(57.02-64.33)   | 47.83<br>(44.76-50.99)   | 80.03<br>(75.51-84.04)                                                                                                                                              | 91.39<br>(89.67-92.88) | 97.78<br>(95.79-98.94) | 42.99<br>(39.29-46.73)                                                                                   | 26.90<br>(23.57-30.34) | 15.37<br>(11.72-20.04) | 19.54<br>(17.76-21.26)                                                                                                 | 14.09<br>(12.48-15.76) | 8.32<br>(5.93-11.22)   |
| Nicaragua    | 85.87<br>(72.85-101.08)                                                             | 99.63<br>(85.16-117.39)  | 68.19<br>(53.07-86.42)   | 71.45<br>(62.79-79.12)                                                                                                                                              | 90.96<br>(88.15-93.46) | 96.86<br>(93.76-98.59) | 62.70<br>(60.22-65.44)                                                                                   | 35.55<br>(33.28-37.77) | 15.36<br>(12.58-18.74) | 23.25<br>(22.14-24.31)                                                                                                 | 16.09<br>(15.26-16.95) | 7.71<br>(5.92-9.68)    |
| Panama       | 67.96<br>(56.06-81.22)                                                              | 63.79<br>(54.57-75.28)   | 68.79<br>(54.28-85.80)   | 86.33<br>(78.12-92.30)                                                                                                                                              | 90.54<br>(87.94-92.77) | 94.55<br>(91.08-96.92) | 27.35<br>(23.80-31.06)                                                                                   | 22.94<br>(19.70-26.84) | 17.55<br>(13.19-23.18) | 11.66<br>(10.21-13.22)                                                                                                 | 10.28<br>(8.63-11.98)  | 8.15<br>(5.63-11.06)   |

**Appendix Table 1b. Unscaled values for each SDG health-related indicator by country for 1990, 2000, and 2015**

| Location            | Indicator 3.1.1: Maternal mortality ratio (maternal deaths per 100,000 live births) |                           |                           | Indicator 3.1.2: Proportion of births attended by skilled health personnel (doctors, nurses, midwives, or country-specific medical staff [e.g., clinical officers]) |                        |                        | Indicator 3.2.1: Under-5 mortality rate (probability of dying before the age of 5 per 1,000 live births) |                        |                        | Indicator 3.2.2: Neonatal mortality rate (probability of dying during the first 28 days of life per 1,000 live births) |                        |                        |
|---------------------|-------------------------------------------------------------------------------------|---------------------------|---------------------------|---------------------------------------------------------------------------------------------------------------------------------------------------------------------|------------------------|------------------------|----------------------------------------------------------------------------------------------------------|------------------------|------------------------|------------------------------------------------------------------------------------------------------------------------|------------------------|------------------------|
|                     | 1990                                                                                | 2000                      | 2015                      | 1990                                                                                                                                                                | 2000                   | 2015                   | 1990                                                                                                     | 2000                   | 2015                   | 1990                                                                                                                   | 2000                   | 2015                   |
| Venezuela           | 66.95<br>(60.09-73.68)                                                              | 58.04<br>(52.26-64.21)    | 63.17<br>(49.46-77.41)    | 94.73<br>(91.01-97.22)                                                                                                                                              | 97.40<br>(96.00-98.47) | 98.00<br>(96.35-99.00) | 28.12<br>(27.89-28.36)                                                                                   | 21.08<br>(20.89-21.28) | 16.87<br>(15.77-18.09) | 13.78<br>(13.09-14.35)                                                                                                 | 10.98<br>(10.42-11.44) | 9.06<br>(8.25-9.88)    |
| Bolivia             | 387.22<br>(311.65-480.73)                                                           | 207.62<br>(174.29-244.02) | 144.53<br>(102.23-201.09) | 45.27<br>(42.96-47.66)                                                                                                                                              | 63.03<br>(61.24-64.82) | 83.95<br>(79.19-87.82) | 111.16<br>(107.83-114.57)                                                                                | 68.26<br>(65.06-71.41) | 29.37<br>(24.19-35.66) | 37.09<br>(34.14-39.66)                                                                                                 | 27.14<br>(25.21-28.89) | 15.36<br>(12.80-17.99) |
| Ecuador             | 123.52<br>(107.84-140.18)                                                           | 73.27<br>(62.74-84.66)    | 51.22<br>(40.88-63.92)    | 87.11<br>(83.74-90.19)                                                                                                                                              | 95.38<br>(93.53-96.75) | 98.14<br>(96.95-98.93) | 48.25<br>(46.05-50.56)                                                                                   | 33.58<br>(31.40-36.01) | 17.75<br>(15.24-20.70) | 13.84<br>(12.87-14.63)                                                                                                 | 11.38<br>(10.59-12.13) | 6.95<br>(5.68-8.28)    |
| Peru                | 178.84<br>(150.89-212.38)                                                           | 109.53<br>(95.66-124.60)  | 47.02<br>(35.42-58.89)    | 64.81<br>(60.61-69.09)                                                                                                                                              | 67.37<br>(63.31-71.47) | 91.92<br>(89.73-93.96) | 77.56<br>(74.85-80.19)                                                                                   | 34.89<br>(33.33-36.29) | 15.79<br>(13.50-18.77) | 25.45<br>(23.43-27.07)                                                                                                 | 15.20<br>(14.20-16.08) | 7.57<br>(6.09-9.24)    |
| Antigua and Barbuda | 52.65<br>(44.51-63.22)                                                              | 49.15<br>(40.54-59.25)    | 35.99<br>(30.04-43.50)    | 98.19<br>(97.14-98.91)                                                                                                                                              | 98.90<br>(98.33-99.34) | 99.31<br>(98.92-99.59) | 18.85<br>(14.33-24.27)                                                                                   | 18.84<br>(14.74-23.67) | 12.87<br>(8.84-18.41)  | 10.68<br>(7.56-13.76)                                                                                                  | 10.96<br>(8.17-13.79)  | 7.34<br>(4.86-11.09)   |
| The Bahamas         | 72.71<br>(57.90-89.44)                                                              | 73.53<br>(59.96-89.77)    | 49.07<br>(35.94-62.19)    | 98.20<br>(97.16-98.94)                                                                                                                                              | 98.87<br>(98.30-99.29) | 99.21<br>(98.75-99.51) | 32.56<br>(22.09-45.36)                                                                                   | 18.36<br>(13.61-23.90) | 16.21<br>(9.06-28.81)  | 22.25<br>(15.51-29.71)                                                                                                 | 13.10<br>(9.19-17.26)  | 11.68<br>(6.33-20.60)  |
| Barbados            | 80.79<br>(69.28-92.67)                                                              | 33.93<br>(28.27-40.23)    | 38.02<br>(29.78-48.29)    | 97.28<br>(95.77-98.39)                                                                                                                                              | 98.13<br>(97.14-98.80) | 99.26<br>(98.81-99.56) | 26.40<br>(17.35-38.05)                                                                                   | 20.97<br>(14.10-29.91) | 16.22<br>(9.12-27.31)  | 17.17<br>(11.57-23.43)                                                                                                 | 14.11<br>(9.19-19.78)  | 11.04<br>(5.94-18.79)  |
| Belize              | 46.46<br>(38.29-55.54)                                                              | 61.09<br>(50.42-73.22)    | 31.80<br>(24.82-40.97)    | 82.02<br>(80.12-83.96)                                                                                                                                              | 94.01<br>(92.06-95.64) | 97.53<br>(96.45-98.33) | 38.97<br>(32.84-45.84)                                                                                   | 25.86<br>(20.72-31.70) | 16.67<br>(10.54-26.60) | 19.20<br>(16.68-21.78)                                                                                                 | 14.04<br>(11.30-16.90) | 9.40<br>(5.50-15.24)   |
| Cuba                | 51.18<br>(45.31-57.96)                                                              | 51.28<br>(45.56-57.92)    | 41.15<br>(35.31-47.79)    | 98.60<br>(97.80-99.13)                                                                                                                                              | 98.79<br>(98.16-99.24) | 99.35<br>(98.97-99.60) | 13.67<br>(13.47-13.87)                                                                                   | 8.39<br>(8.24-8.55)    | 6.08<br>(5.77-6.46)    | 7.10<br>(6.74-7.41)                                                                                                    | 4.36<br>(4.15-4.52)    | 3.22<br>(3.00-3.48)    |
| Dominica            | 22.26<br>(18.16-27.01)                                                              | 19.12<br>(15.51-23.37)    | 37.78<br>(29.40-48.09)    | 97.07<br>(95.41-98.26)                                                                                                                                              | 98.37<br>(97.58-98.99) | 99.20<br>(98.76-99.51) | 25.13<br>(18.88-33.04)                                                                                   | 24.10<br>(18.84-30.46) | 26.45<br>(17.11-39.73) | 13.97<br>(10.49-17.69)                                                                                                 | 13.83<br>(10.71-17.27) | 15.61<br>(9.98-21.99)  |

**Appendix Table 1b. Unscaled values for each SDG health-related indicator by country for 1990, 2000, and 2015**

| Location                         | Indicator 3.1.1: Maternal mortality ratio (maternal deaths per 100,000 live births) |                           |                           | Indicator 3.1.2: Proportion of births attended by skilled health personnel (doctors, nurses, midwives, or country-specific medical staff [e.g., clinical officers]) |                        |                        | Indicator 3.2.1: Under-5 mortality rate (probability of dying before the age of 5 per 1,000 live births) |                         |                        | Indicator 3.2.2: Neonatal mortality rate (probability of dying during the first 28 days of life per 1,000 live births) |                        |                        |
|----------------------------------|-------------------------------------------------------------------------------------|---------------------------|---------------------------|---------------------------------------------------------------------------------------------------------------------------------------------------------------------|------------------------|------------------------|----------------------------------------------------------------------------------------------------------|-------------------------|------------------------|------------------------------------------------------------------------------------------------------------------------|------------------------|------------------------|
|                                  | 1990                                                                                | 2000                      | 2015                      | 1990                                                                                                                                                                | 2000                   | 2015                   | 1990                                                                                                     | 2000                    | 2015                   | 1990                                                                                                                   | 2000                   | 2015                   |
| Dominican Republic               | 89.75<br>(76.91-103.86)                                                             | 59.37<br>(51.70-68.02)    | 52.93<br>(42.10-66.06)    | 94.33<br>(93.40-95.16)                                                                                                                                              | 98.45<br>(98.17-98.70) | 99.31<br>(99.04-99.51) | 59.54<br>(55.91-63.34)                                                                                   | 37.01<br>(34.23-39.88)  | 25.00<br>(20.52-30.44) | 27.82<br>(26.08-29.58)                                                                                                 | 20.04<br>(18.53-21.46) | 15.08<br>(12.43-18.02) |
| Grenada                          | 51.16<br>(41.67-61.40)                                                              | 29.83<br>(25.19-35.98)    | 33.39<br>(26.33-42.09)    | 97.85<br>(96.58-98.71)                                                                                                                                              | 98.82<br>(98.21-99.25) | 99.31<br>(98.92-99.59) | 27.46<br>(16.76-41.82)                                                                                   | 20.41<br>(14.50-27.92)  | 15.92<br>(8.68-27.47)  | 14.97<br>(9.20-21.31)                                                                                                  | 11.72<br>(7.89-15.91)  | 9.27<br>(4.77-16.06)   |
| Guyana                           | 132.27<br>(111.35-154.76)                                                           | 160.32<br>(134.50-193.97) | 107.97<br>(79.59-140.14)  | 85.35<br>(79.72-90.33)                                                                                                                                              | 89.99<br>(87.50-92.11) | 95.86<br>(94.32-97.10) | 52.06<br>(48.47-55.47)                                                                                   | 40.70<br>(37.82-43.79)  | 27.96<br>(22.01-35.41) | 26.14<br>(24.30-28.21)                                                                                                 | 22.01<br>(20.44-23.72) | 16.83<br>(13.60-20.47) |
| Haiti                            | 581.86<br>(465.87-770.32)                                                           | 578.38<br>(459.44-755.15) | 512.52<br>(330.24-785.39) | 21.28<br>(18.65-24.24)                                                                                                                                              | 24.10<br>(22.10-26.10) | 46.25<br>(40.27-52.32) | 148.31<br>(139.31-158.52)                                                                                | 95.81<br>(88.00-104.23) | 58.37<br>(42.11-79.74) | 42.32<br>(38.63-45.91)                                                                                                 | 30.94<br>(28.43-33.57) | 23.57<br>(18.54-29.60) |
| Jamaica                          | 40.47<br>(31.92-50.81)                                                              | 65.78<br>(52.56-81.28)    | 50.01<br>(36.20-66.43)    | 93.73<br>(92.27-94.98)                                                                                                                                              | 97.94<br>(97.32-98.43) | 99.19<br>(98.73-99.52) | 27.51<br>(21.06-35.67)                                                                                   | 21.99<br>(15.90-29.71)  | 18.13<br>(11.58-27.58) | 15.16<br>(11.73-18.90)                                                                                                 | 12.67<br>(8.93-16.89)  | 10.77<br>(6.38-16.32)  |
| Saint Lucia                      | 54.40<br>(46.53-64.04)                                                              | 83.70<br>(71.63-96.08)    | 59.13<br>(47.16-73.12)    | 97.69<br>(96.39-98.66)                                                                                                                                              | 98.54<br>(97.76-99.08) | 99.23<br>(98.77-99.54) | 31.33<br>(20.22-46.92)                                                                                   | 20.07<br>(13.91-27.44)  | 17.66<br>(9.22-31.46)  | 16.42<br>(10.88-22.76)                                                                                                 | 11.29<br>(7.38-15.33)  | 10.18<br>(4.97-17.64)  |
| Saint Vincent and the Grenadines | 54.80<br>(43.81-68.02)                                                              | 33.83<br>(29.10-39.66)    | 40.19<br>(32.69-48.82)    | 97.63<br>(96.22-98.60)                                                                                                                                              | 98.67<br>(98.02-99.17) | 99.17<br>(98.74-99.48) | 39.70<br>(28.36-53.20)                                                                                   | 31.79<br>(24.53-40.50)  | 21.92<br>(13.83-33.62) | 21.89<br>(16.69-27.82)                                                                                                 | 18.77<br>(15.03-22.97) | 13.82<br>(8.40-20.51)  |
| Suriname                         | 60.81<br>(49.56-73.42)                                                              | 84.52<br>(70.90-101.42)   | 50.26<br>(38.22-64.91)    | 90.75<br>(86.09-94.31)                                                                                                                                              | 93.83<br>(90.75-96.12) | 98.11<br>(97.04-98.86) | 50.97<br>(45.78-56.93)                                                                                   | 44.59<br>(38.70-51.11)  | 31.12<br>(24.92-39.54) | 24.83<br>(22.64-27.34)                                                                                                 | 23.12<br>(20.68-25.81) | 18.25<br>(15.00-22.15) |
| Trinidad and Tobago              | 74.97<br>(66.26-84.49)                                                              | 60.55<br>(52.81-69.02)    | 49.04<br>(38.43-61.63)    | 98.55<br>(97.91-99.01)                                                                                                                                              | 98.72<br>(97.98-99.22) | 99.39<br>(99.01-99.64) | 28.21<br>(24.23-32.85)                                                                                   | 27.54<br>(22.91-33.34)  | 19.23<br>(11.91-29.98) | 18.31<br>(15.83-20.97)                                                                                                 | 18.30<br>(15.45-21.72) | 13.21<br>(7.77-20.01)  |
| Brazil                           | 83.43<br>(78.37-89.23)                                                              | 70.17<br>(66.04-74.63)    | 64.52<br>(58.45-70.81)    | 85.02<br>(80.95-88.52)                                                                                                                                              | 97.26<br>(95.72-98.33) | 99.05<br>(97.93-99.61) | 52.12<br>(47.79-57.27)                                                                                   | 31.22<br>(27.19-35.56)  | 16.94<br>(13.40-21.36) | 22.37<br>(20.96-23.96)                                                                                                 | 15.82<br>(14.19-17.49) | 9.38<br>(7.08-11.98)   |

**Appendix Table 1b. Unscaled values for each SDG health-related indicator by country for 1990, 2000, and 2015**

| Location    | Indicator 3.1.1: Maternal mortality ratio (maternal deaths per 100,000 live births) |                           |                           | Indicator 3.1.2: Proportion of births attended by skilled health personnel (doctors, nurses, midwives, or country-specific medical staff [e.g., clinical officers]) |                        |                        | Indicator 3.2.1: Under-5 mortality rate (probability of dying before the age of 5 per 1,000 live births) |                           |                        | Indicator 3.2.2: Neonatal mortality rate (probability of dying during the first 28 days of life per 1,000 live births) |                        |                        |
|-------------|-------------------------------------------------------------------------------------|---------------------------|---------------------------|---------------------------------------------------------------------------------------------------------------------------------------------------------------------|------------------------|------------------------|----------------------------------------------------------------------------------------------------------|---------------------------|------------------------|------------------------------------------------------------------------------------------------------------------------|------------------------|------------------------|
|             | 1990                                                                                | 2000                      | 2015                      | 1990                                                                                                                                                                | 2000                   | 2015                   | 1990                                                                                                     | 2000                      | 2015                   | 1990                                                                                                                   | 2000                   | 2015                   |
| Paraguay    | 146.27<br>(123.18-170.13)                                                           | 109.68<br>(94.18-128.54)  | 100.16<br>(72.22-131.36)  | 69.11<br>(65.96-71.73)                                                                                                                                              | 79.85<br>(76.43-82.96) | 92.08<br>(85.73-96.21) | 32.53<br>(30.07-35.08)                                                                                   | 28.10<br>(25.20-31.33)    | 17.91<br>(14.27-22.43) | 16.21<br>(15.03-17.39)                                                                                                 | 14.79<br>(13.33-16.21) | 10.04<br>(7.68-12.67)  |
| China       | 113.14<br>(96.64-130.90)                                                            | 84.29<br>(75.37-94.40)    | 17.39<br>(14.74-20.24)    | 65.37<br>(43.20-83.89)                                                                                                                                              | 82.05<br>(72.35-89.24) | 96.78<br>(93.08-98.75) | 55.93<br>(45.81-67.38)                                                                                   | 37.68<br>(31.91-44.81)    | 12.32<br>(8.60-17.18)  | 22.38<br>(18.96-25.82)                                                                                                 | 17.57<br>(15.37-20.04) | 6.07<br>(4.10-9.06)    |
| North Korea | 99.74<br>(56.02-169.54)                                                             | 93.79<br>(53.37-152.88)   | 71.76<br>(42.49-111.02)   | 91.49<br>(77.65-97.64)                                                                                                                                              | 92.02<br>(80.73-97.78) | 94.66<br>(86.33-98.59) | 56.34<br>(24.31-108.56)                                                                                  | 149.64<br>(39.04-372.87)  | 19.22<br>(8.96-36.30)  | 23.18<br>(12.30-38.01)                                                                                                 | 18.37<br>(8.55-30.14)  | 10.34<br>(4.48-18.43)  |
| Taiwan      | 20.75<br>(13.38-30.40)                                                              | 14.85<br>(10.20-20.67)    | 11.31<br>(7.40-16.61)     | 96.55<br>(90.98-99.10)                                                                                                                                              | 98.13<br>(94.89-99.49) | 99.05<br>(97.51-99.77) | 8.74<br>(8.43-9.04)                                                                                      | 8.53<br>(8.21-8.85)       | 6.56<br>(4.24-10.28)   | 3.67<br>(3.33-4.01)                                                                                                    | 3.75<br>(3.41-4.06)    | 2.99<br>(1.79-4.62)    |
| Cambodia    | 386.44<br>(324.62-460.66)                                                           | 438.26<br>(368.74-526.73) | 129.69<br>(86.11-189.15)  | 23.25<br>(18.02-28.92)                                                                                                                                              | 37.56<br>(34.05-41.23) | 81.78<br>(76.94-85.71) | 117.88<br>(113.57-122.70)                                                                                | 97.24<br>(92.92-101.59)   | 31.36<br>(27.22-36.01) | 38.57<br>(36.36-40.60)                                                                                                 | 34.25<br>(32.38-35.99) | 15.85<br>(14.10-17.65) |
| Indonesia   | 397.93<br>(330.50-464.58)                                                           | 344.36<br>(294.45-407.73) | 176.94<br>(120.80-248.48) | 38.43<br>(37.38-39.51)                                                                                                                                              | 67.51<br>(66.64-68.39) | 90.12<br>(88.25-91.60) | 84.35<br>(82.35-86.40)                                                                                   | 50.07<br>(48.35-51.80)    | 23.68<br>(20.44-27.48) | 28.68<br>(26.68-30.42)                                                                                                 | 20.90<br>(19.69-21.96) | 12.45<br>(10.69-14.23) |
| Laos        | 649.93<br>(465.96-857.19)                                                           | 587.42<br>(470.86-758.26) | 233.79<br>(165.15-319.78) | 16.33<br>(11.94-21.72)                                                                                                                                              | 24.89<br>(21.75-28.27) | 50.32<br>(43.03-57.67) | 184.68<br>(171.63-198.95)                                                                                | 142.89<br>(131.62-155.52) | 60.18<br>(45.77-77.70) | 60.66<br>(55.64-66.04)                                                                                                 | 50.39<br>(46.44-54.69) | 27.47<br>(22.71-33.46) |
| Malaysia    | 87.32<br>(74.70-102.54)                                                             | 69.99<br>(61.60-79.88)    | 61.22<br>(45.46-79.68)    | 93.01<br>(90.00-95.29)                                                                                                                                              | 96.94<br>(95.76-97.95) | 99.38<br>(99.07-99.60) | 16.82<br>(16.51-17.15)                                                                                   | 9.28<br>(9.07-9.49)       | 6.50<br>(5.51-7.69)    | 7.98<br>(7.39-8.56)                                                                                                    | 4.15<br>(3.86-4.44)    | 3.06<br>(2.48-3.71)    |
| Maldives    | 183.59<br>(134.56-261.51)                                                           | 91.95<br>(73.72-113.97)   | 40.55<br>(27.41-56.30)    | 73.91<br>(65.84-81.72)                                                                                                                                              | 88.27<br>(83.86-91.79) | 98.70<br>(98.15-99.15) | 67.09<br>(63.08-71.35)                                                                                   | 35.84<br>(33.13-38.77)    | 12.41<br>(10.34-15.16) | 25.12<br>(23.21-26.97)                                                                                                 | 16.65<br>(15.35-17.95) | 5.89<br>(4.75-7.54)    |
| Mauritius   | 66.81<br>(58.66-75.62)                                                              | 41.71<br>(36.73-47.30)    | 48.61<br>(41.06-57.33)    | 96.77<br>(95.19-97.92)                                                                                                                                              | 98.62<br>(98.00-99.11) | 99.59<br>(99.38-99.74) | 22.38<br>(21.71-23.09)                                                                                   | 17.86<br>(17.21-18.51)    | 13.41<br>(12.26-14.71) | 13.13<br>(12.39-13.78)                                                                                                 | 10.69<br>(10.04-11.33) | 7.93<br>(7.04-8.95)    |

**Appendix Table 1b. Unscaled values for each SDG health-related indicator by country for 1990, 2000, and 2015**

| Location                       | Indicator 3.1.1: Maternal mortality ratio (maternal deaths per 100,000 live births) |                             |                           | Indicator 3.1.2: Proportion of births attended by skilled health personnel (doctors, nurses, midwives, or country-specific medical staff [e.g., clinical officers]) |                        |                        | Indicator 3.2.1: Under-5 mortality rate (probability of dying before the age of 5 per 1,000 live births) |                          |                        | Indicator 3.2.2: Neonatal mortality rate (probability of dying during the first 28 days of life per 1,000 live births) |                        |                        |
|--------------------------------|-------------------------------------------------------------------------------------|-----------------------------|---------------------------|---------------------------------------------------------------------------------------------------------------------------------------------------------------------|------------------------|------------------------|----------------------------------------------------------------------------------------------------------|--------------------------|------------------------|------------------------------------------------------------------------------------------------------------------------|------------------------|------------------------|
|                                | 1990                                                                                | 2000                        | 2015                      | 1990                                                                                                                                                                | 2000                   | 2015                   | 1990                                                                                                     | 2000                     | 2015                   | 1990                                                                                                                   | 2000                   | 2015                   |
| Myanmar                        | 906.10<br>(517.65-1,479.99)                                                         | 818.02<br>(433.98-1,411.86) | 389.24<br>(208.15-684.30) | 51.98<br>(42.63-61.90)                                                                                                                                              | 68.62<br>(63.08-73.73) | 86.55<br>(82.18-90.28) | 110.23<br>(93.45-128.37)                                                                                 | 78.49<br>(65.08-93.85)   | 32.37<br>(24.80-43.01) | 36.42<br>(31.48-41.78)                                                                                                 | 29.46<br>(25.40-34.05) | 16.37<br>(13.10-20.28) |
| Philippines                    | 96.05<br>(82.35-110.55)                                                             | 69.53<br>(63.55-76.79)      | 69.38<br>(56.06-84.58)    | 51.65<br>(48.95-54.46)                                                                                                                                              | 60.89<br>(59.21-62.50) | 80.03<br>(77.01-82.88) | 55.72<br>(53.76-57.68)                                                                                   | 36.41<br>(34.74-38.09)   | 23.19<br>(20.52-26.26) | 19.83<br>(18.03-21.42)                                                                                                 | 15.26<br>(14.02-16.39) | 11.01<br>(9.58-12.56)  |
| Sri Lanka                      | 74.54<br>(61.94-89.76)                                                              | 63.03<br>(55.52-71.79)      | 32.45<br>(21.35-47.42)    | 92.83<br>(91.15-94.35)                                                                                                                                              | 98.73<br>(98.20-99.13) | 99.68<br>(99.50-99.79) | 40.93<br>(39.62-42.29)                                                                                   | 16.39<br>(15.94-16.83)   | 8.07<br>(6.17-10.49)   | 20.81<br>(19.37-22.05)                                                                                                 | 8.95<br>(8.27-9.57)    | 4.42<br>(3.32-5.69)    |
| Seychelles                     | 60.22<br>(46.34-75.70)                                                              | 38.64<br>(30.72-49.43)      | 32.02<br>(24.25-42.77)    | 82.40<br>(74.82-88.12)                                                                                                                                              | 93.13<br>(89.62-95.64) | 97.92<br>(96.91-98.71) | 17.63<br>(15.98-19.34)                                                                                   | 13.42<br>(11.99-14.99)   | 10.65<br>(8.58-13.19)  | 8.84<br>(7.67-9.92)                                                                                                    | 6.52<br>(5.60-7.59)    | 5.29<br>(4.24-6.75)    |
| Thailand                       | 40.23<br>(33.32-48.29)                                                              | 29.85<br>(22.80-37.90)      | 19.84<br>(11.89-29.47)    | 77.04<br>(73.24-80.48)                                                                                                                                              | 96.42<br>(95.43-97.28) | 99.11<br>(98.83-99.36) | 27.69<br>(24.54-31.16)                                                                                   | 15.03<br>(13.05-17.55)   | 5.64<br>(4.54-6.98)    | 16.93<br>(15.18-18.88)                                                                                                 | 9.21<br>(7.71-11.11)   | 3.35<br>(2.61-4.23)    |
| Timor-Leste                    | 633.94<br>(426.61-837.62)                                                           | 399.27<br>(260.75-496.27)   | 231.98<br>(142.41-323.22) | 11.76<br>(7.95-16.27)                                                                                                                                               | 20.74<br>(16.49-25.39) | 52.55<br>(43.55-60.70) | 151.35<br>(138.54-165.26)                                                                                | 108.09<br>(95.08-121.82) | 38.66<br>(23.92-59.18) | 38.87<br>(35.23-42.70)                                                                                                 | 30.89<br>(27.86-34.08) | 16.38<br>(11.50-22.15) |
| Vietnam                        | 46.66<br>(30.20-65.75)                                                              | 32.09<br>(22.12-44.72)      | 15.54<br>(9.35-24.38)     | 66.94<br>(59.93-73.94)                                                                                                                                              | 83.14<br>(80.39-85.46) | 94.92<br>(93.15-96.43) | 47.69<br>(45.51-49.89)                                                                                   | 27.89<br>(26.17-29.80)   | 13.43<br>(11.49-15.94) | 21.26<br>(19.86-22.42)                                                                                                 | 14.58<br>(13.50-15.62) | 6.98<br>(5.72-8.70)    |
| Federated States of Micronesia | 132.28<br>(63.14-232.10)                                                            | 117.67<br>(50.23-217.71)    | 87.65<br>(45.11-166.94)   | 87.13<br>(78.02-93.37)                                                                                                                                              | 93.14<br>(88.84-96.09) | 98.45<br>(97.05-99.32) | 40.78<br>(32.08-51.23)                                                                                   | 23.80<br>(17.18-32.31)   | 11.49<br>(7.70-16.79)  | 15.23<br>(12.75-17.93)                                                                                                 | 10.52<br>(7.55-13.60)  | 4.92<br>(3.23-7.77)    |
| Fiji                           | 95.61<br>(65.28-133.12)                                                             | 113.91<br>(87.02-142.26)    | 97.49<br>(66.53-134.34)   | 97.78<br>(95.79-99.03)                                                                                                                                              | 98.52<br>(97.27-99.33) | 99.21<br>(98.58-99.61) | 26.85<br>(19.03-37.45)                                                                                   | 28.83<br>(21.40-37.84)   | 30.40<br>(18.20-48.60) | 10.27<br>(7.60-13.02)                                                                                                  | 11.25<br>(8.89-13.79)  | 12.16<br>(7.94-16.89)  |
| Kiribati                       | 248.83<br>(188.28-325.82)                                                           | 170.30<br>(127.56-219.42)   | 129.72<br>(86.11-187.11)  | 79.59<br>(66.80-88.97)                                                                                                                                              | 84.92<br>(75.47-91.08) | 92.00<br>(86.45-95.99) | 84.31<br>(66.85-103.04)                                                                                  | 64.69<br>(54.09-75.48)   | 39.08<br>(21.28-67.13) | 23.25<br>(19.73-27.09)                                                                                                 | 20.23<br>(17.63-22.83) | 15.18<br>(9.64-22.07)  |

**Appendix Table 1b. Unscaled values for each SDG health-related indicator by country for 1990, 2000, and 2015**

| Location         | Indicator 3.1.1: Maternal mortality ratio (maternal deaths per 100,000 live births) |                             |                             | Indicator 3.1.2: Proportion of births attended by skilled health personnel (doctors, nurses, midwives, or country-specific medical staff [e.g., clinical officers]) |                        |                        | Indicator 3.2.1: Under-5 mortality rate (probability of dying before the age of 5 per 1,000 live births) |                           |                        | Indicator 3.2.2: Neonatal mortality rate (probability of dying during the first 28 days of life per 1,000 live births) |                        |                        |
|------------------|-------------------------------------------------------------------------------------|-----------------------------|-----------------------------|---------------------------------------------------------------------------------------------------------------------------------------------------------------------|------------------------|------------------------|----------------------------------------------------------------------------------------------------------|---------------------------|------------------------|------------------------------------------------------------------------------------------------------------------------|------------------------|------------------------|
|                  | 1990                                                                                | 2000                        | 2015                        | 1990                                                                                                                                                                | 2000                   | 2015                   | 1990                                                                                                     | 2000                      | 2015                   | 1990                                                                                                                   | 2000                   | 2015                   |
| Marshall Islands | 111.90<br>(79.06-155.04)                                                            | 126.15<br>(63.50-187.05)    | 108.30<br>(69.41-164.69)    | 84.52<br>(74.53-91.57)                                                                                                                                              | 90.94<br>(86.16-94.65) | 95.53<br>(92.81-97.55) | 43.22<br>(31.33-56.62)                                                                                   | 38.77<br>(25.88-54.96)    | 18.80<br>(10.57-31.03) | 14.94<br>(11.95-18.02)                                                                                                 | 14.47<br>(10.85-18.50) | 8.27<br>(4.03-13.30)   |
| Papua New Guinea | 536.94<br>(318.36-847.60)                                                           | 517.90<br>(288.36-832.18)   | 433.69<br>(236.96-746.02)   | 58.00<br>(49.91-65.41)                                                                                                                                              | 55.17<br>(49.11-61.11) | 67.11<br>(54.08-79.45) | 91.71<br>(78.40-106.15)                                                                                  | 75.56<br>(57.20-97.56)    | 44.47<br>(26.83-70.50) | 21.83<br>(18.94-24.93)                                                                                                 | 19.96<br>(16.53-24.22) | 15.05<br>(10.60-20.67) |
| Samoa            | 64.56<br>(37.62-100.73)                                                             | 60.41<br>(29.82-95.45)      | 54.74<br>(31.28-83.54)      | 84.82<br>(75.31-91.97)                                                                                                                                              | 91.24<br>(86.14-94.99) | 91.35<br>(85.60-95.44) | 20.50<br>(11.22-36.32)                                                                                   | 14.47<br>(7.43-25.20)     | 8.68<br>(4.33-16.02)   | 8.05<br>(3.94-13.48)                                                                                                   | 5.73<br>(2.76-10.56)   | 3.41<br>(1.53-6.79)    |
| Solomon Islands  | 262.69<br>(133.63-432.96)                                                           | 231.97<br>(116.96-402.70)   | 206.55<br>(101.74-368.86)   | 76.07<br>(62.86-85.71)                                                                                                                                              | 84.37<br>(78.00-89.75) | 95.15<br>(91.94-97.50) | 44.97<br>(35.25-56.46)                                                                                   | 33.79<br>(25.65-43.52)    | 19.79<br>(13.48-28.49) | 14.24<br>(11.87-16.68)                                                                                                 | 12.38<br>(9.93-14.91)  | 8.33<br>(5.16-11.63)   |
| Tonga            | 197.00<br>(135.12-278.64)                                                           | 186.63<br>(147.73-230.22)   | 129.41<br>(83.28-192.07)    | 84.92<br>(75.99-91.61)                                                                                                                                              | 93.62<br>(91.31-95.47) | 98.69<br>(97.67-99.32) | 26.39<br>(17.11-38.47)                                                                                   | 24.84<br>(15.45-36.66)    | 17.78<br>(10.51-28.77) | 11.00<br>(7.16-14.78)                                                                                                  | 10.75<br>(6.59-14.66)  | 8.05<br>(4.30-12.77)   |
| Vanuatu          | 201.51<br>(102.54-351.02)                                                           | 201.35<br>(76.68-357.30)    | 171.18<br>(91.03-308.70)    | 82.01<br>(71.01-89.87)                                                                                                                                              | 85.21<br>(78.86-90.38) | 91.12<br>(85.30-95.13) | 39.16<br>(30.83-49.08)                                                                                   | 38.57<br>(31.20-47.35)    | 27.04<br>(18.49-40.12) | 13.55<br>(11.47-15.69)                                                                                                 | 13.95<br>(12.04-16.27) | 11.33<br>(7.99-15.13)  |
| Afghanistan      | 727.24<br>(446.79-1,122.70)                                                         | 747.76<br>(463.47-1,128.82) | 785.32<br>(461.63-1,217.57) | 28.07<br>(21.68-35.65)                                                                                                                                              | 27.74<br>(22.01-33.66) | 43.59<br>(36.87-49.96) | 160.55<br>(149.51-172.82)                                                                                | 133.28<br>(124.18-142.46) | 82.63<br>(69.49-98.00) | 46.98<br>(41.74-51.65)                                                                                                 | 40.72<br>(36.20-44.38) | 28.63<br>(24.72-32.99) |
| Algeria          | 150.99<br>(115.86-187.19)                                                           | 122.78<br>(95.96-153.52)    | 66.30<br>(49.15-85.47)      | 75.29<br>(67.57-81.79)                                                                                                                                              | 86.08<br>(81.38-90.22) | 94.56<br>(92.39-96.25) | 54.44<br>(49.52-59.31)                                                                                   | 36.65<br>(32.55-41.68)    | 22.74<br>(17.90-29.41) | 23.70<br>(21.79-25.56)                                                                                                 | 18.23<br>(16.49-20.02) | 12.64<br>(9.96-15.81)  |
| Bahrain          | 53.36<br>(39.60-73.38)                                                              | 35.41<br>(27.17-47.23)      | 24.41<br>(18.13-35.24)      | 91.58<br>(88.26-94.27)                                                                                                                                              | 96.73<br>(95.45-97.80) | 99.03<br>(98.63-99.35) | 21.21<br>(19.86-22.57)                                                                                   | 12.69<br>(11.64-13.70)    | 6.62<br>(5.62-7.75)    | 12.36<br>(11.50-13.20)                                                                                                 | 6.95<br>(6.30-7.64)    | 3.80<br>(3.16-4.47)    |
| Egypt            | 142.06<br>(119.05-164.77)                                                           | 67.55<br>(55.15-80.72)      | 41.69<br>(32.22-52.99)      | 40.83<br>(39.55-42.23)                                                                                                                                              | 67.08<br>(65.93-68.25) | 89.39<br>(87.05-91.41) | 82.12<br>(77.46-86.68)                                                                                   | 43.25<br>(39.93-46.83)    | 21.54<br>(16.27-28.31) | 31.86<br>(29.97-33.64)                                                                                                 | 20.67<br>(19.31-21.99) | 12.06<br>(8.91-15.44)  |

**Appendix Table 1b. Unscaled values for each SDG health-related indicator by country for 1990, 2000, and 2015**

| Location  | Indicator 3.1.1: Maternal mortality ratio (maternal deaths per 100,000 live births) |                           |                         | Indicator 3.1.2: Proportion of births attended by skilled health personnel (doctors, nurses, midwives, or country-specific medical staff [e.g., clinical officers]) |                        |                        | Indicator 3.2.1: Under-5 mortality rate (probability of dying before the age of 5 per 1,000 live births) |                        |                        | Indicator 3.2.2: Neonatal mortality rate (probability of dying during the first 28 days of life per 1,000 live births) |                        |                        |
|-----------|-------------------------------------------------------------------------------------|---------------------------|-------------------------|---------------------------------------------------------------------------------------------------------------------------------------------------------------------|------------------------|------------------------|----------------------------------------------------------------------------------------------------------|------------------------|------------------------|------------------------------------------------------------------------------------------------------------------------|------------------------|------------------------|
|           | 1990                                                                                | 2000                      | 2015                    | 1990                                                                                                                                                                | 2000                   | 2015                   | 1990                                                                                                     | 2000                   | 2015                   | 1990                                                                                                                   | 2000                   | 2015                   |
| Iran      | 55.58<br>(37.59-76.85)                                                              | 33.45<br>(26.26-42.64)    | 20.29<br>(13.89-30.55)  | 83.15<br>(77.93-87.87)                                                                                                                                              | 94.59<br>(92.64-96.22) | 98.54<br>(97.96-98.99) | 74.94<br>(65.64-85.95)                                                                                   | 38.95<br>(31.92-47.15) | 14.67<br>(10.80-19.53) | 29.35<br>(26.37-32.71)                                                                                                 | 19.60<br>(16.73-22.67) | 8.13<br>(5.59-11.36)   |
| Iraq      | 144.94<br>(104.54-194.03)                                                           | 112.68<br>(77.80-155.59)  | 58.14<br>(34.19-95.59)  | 55.71<br>(46.97-64.16)                                                                                                                                              | 68.30<br>(61.65-73.91) | 89.60<br>(86.66-92.10) | 53.73<br>(51.22-56.23)                                                                                   | 42.37<br>(40.50-44.49) | 27.31<br>(23.20-32.62) | 25.87<br>(24.48-27.17)                                                                                                 | 22.35<br>(21.24-23.42) | 15.49<br>(13.35-18.00) |
| Jordan    | 97.60<br>(74.38-125.04)                                                             | 80.85<br>(58.38-106.05)   | 23.93<br>(17.61-31.19)  | 92.24<br>(91.19-93.25)                                                                                                                                              | 98.32<br>(98.09-98.54) | 99.35<br>(99.17-99.49) | 32.35<br>(31.07-33.69)                                                                                   | 24.15<br>(23.07-25.30) | 14.76<br>(12.89-17.15) | 15.68<br>(14.69-16.67)                                                                                                 | 12.68<br>(11.76-13.56) | 7.73<br>(6.44-9.24)    |
| Kuwait    | 9.50<br>(7.91-11.59)                                                                | 11.70<br>(10.19-13.31)    | 5.77<br>(4.35-7.41)     | 87.71<br>(83.68-91.03)                                                                                                                                              | 95.69<br>(94.32-96.82) | 98.84<br>(98.44-99.16) | 16.10<br>(14.49-18.06)                                                                                   | 12.57<br>(11.74-13.42) | 8.19<br>(6.48-10.23)   | 7.86<br>(6.89-8.91)                                                                                                    | 6.45<br>(5.90-7.05)    | 4.39<br>(3.42-5.42)    |
| Lebanon   | 35.25<br>(22.64-54.68)                                                              | 26.49<br>(17.74-38.80)    | 15.18<br>(8.98-23.88)   | 97.25<br>(96.22-98.03)                                                                                                                                              | 98.76<br>(98.37-99.10) | 99.68<br>(99.54-99.78) | 35.29<br>(30.35-41.30)                                                                                   | 21.75<br>(17.28-26.76) | 8.11<br>(5.90-11.33)   | 17.36<br>(15.19-19.72)                                                                                                 | 12.29<br>(9.62-14.94)  | 4.40<br>(3.15-5.98)    |
| Libya     | 26.49<br>(18.91-35.90)                                                              | 23.84<br>(17.10-31.45)    | 22.77<br>(15.52-32.87)  | 71.86<br>(64.41-79.31)                                                                                                                                              | 81.97<br>(76.37-86.84) | 92.06<br>(89.15-94.33) | 41.53<br>(37.40-45.75)                                                                                   | 28.12<br>(23.88-32.91) | 17.47<br>(13.16-22.58) | 17.64<br>(15.99-19.39)                                                                                                 | 13.46<br>(11.52-15.42) | 8.09<br>(5.68-11.05)   |
| Morocco   | 327.23<br>(253.87-430.90)                                                           | 190.73<br>(142.66-248.99) | 68.15<br>(42.65-107.65) | 32.10<br>(30.11-33.99)                                                                                                                                              | 63.63<br>(61.42-65.83) | 83.61<br>(78.87-87.36) | 70.10<br>(67.20-72.97)                                                                                   | 43.85<br>(40.54-47.50) | 22.44<br>(18.00-27.92) | 29.59<br>(27.84-31.13)                                                                                                 | 21.29<br>(19.85-22.83) | 12.65<br>(10.04-15.45) |
| Palestine | 28.95<br>(18.72-43.23)                                                              | 13.97<br>(11.10-17.45)    | 15.97<br>(11.32-22.95)  | 95.51<br>(93.79-96.85)                                                                                                                                              | 97.96<br>(97.31-98.49) | 98.45<br>(97.93-98.86) | 39.23<br>(35.25-43.58)                                                                                   | 25.79<br>(22.93-28.54) | 17.27<br>(13.49-21.82) | 19.22<br>(17.64-20.83)                                                                                                 | 13.99<br>(12.62-15.37) | 9.87<br>(7.33-12.67)   |
| Oman      | 33.82<br>(19.76-53.96)                                                              | 21.23<br>(14.65-31.68)    | 15.39<br>(10.85-21.31)  | 93.65<br>(91.33-95.53)                                                                                                                                              | 97.08<br>(95.92-97.95) | 99.01<br>(98.59-99.30) | 42.13<br>(35.48-50.35)                                                                                   | 15.26<br>(13.27-17.55) | 9.37<br>(8.12-10.76)   | 19.12<br>(16.69-21.75)                                                                                                 | 7.73<br>(6.36-9.17)    | 4.65<br>(4.05-5.33)    |
| Qatar     | 63.87<br>(41.76-91.47)                                                              | 59.80<br>(41.34-84.22)    | 25.42<br>(16.39-35.64)  | 95.23<br>(93.44-96.78)                                                                                                                                              | 98.02<br>(97.19-98.60) | 99.52<br>(99.32-99.66) | 21.91<br>(16.47-28.59)                                                                                   | 16.18<br>(11.96-21.53) | 8.64<br>(5.98-12.13)   | 11.90<br>(8.77-15.27)                                                                                                  | 8.87<br>(6.12-12.24)   | 4.65<br>(3.18-6.55)    |

**Appendix Table 1b. Unscaled values for each SDG health-related indicator by country for 1990, 2000, and 2015**

| Location             | Indicator 3.1.1: Maternal mortality ratio (maternal deaths per 100,000 live births) |                           |                           | Indicator 3.1.2: Proportion of births attended by skilled health personnel (doctors, nurses, midwives, or country-specific medical staff [e.g., clinical officers]) |                        |                        | Indicator 3.2.1: Under-5 mortality rate (probability of dying before the age of 5 per 1,000 live births) |                         |                        | Indicator 3.2.2: Neonatal mortality rate (probability of dying during the first 28 days of life per 1,000 live births) |                        |                        |
|----------------------|-------------------------------------------------------------------------------------|---------------------------|---------------------------|---------------------------------------------------------------------------------------------------------------------------------------------------------------------|------------------------|------------------------|----------------------------------------------------------------------------------------------------------|-------------------------|------------------------|------------------------------------------------------------------------------------------------------------------------|------------------------|------------------------|
|                      | 1990                                                                                | 2000                      | 2015                      | 1990                                                                                                                                                                | 2000                   | 2015                   | 1990                                                                                                     | 2000                    | 2015                   | 1990                                                                                                                   | 2000                   | 2015                   |
| Saudi Arabia         | 20.71<br>(15.49-27.21)                                                              | 17.44<br>(14.80-20.48)    | 15.35<br>(13.00-18.19)    | 87.25<br>(83.55-90.01)                                                                                                                                              | 93.59<br>(91.74-95.10) | 97.48<br>(96.45-98.26) | 46.45<br>(37.68-57.50)                                                                                   | 23.89<br>(18.19-31.50)  | 11.53<br>(8.29-16.27)  | 21.20<br>(18.07-24.87)                                                                                                 | 13.00<br>(9.96-16.50)  | 6.12<br>(4.35-9.21)    |
| Sudan                | 477.52<br>(313.88-636.92)                                                           | 403.28<br>(244.08-581.83) | 288.64<br>(153.70-439.17) | 70.24<br>(66.48-73.88)                                                                                                                                              | 79.66<br>(74.48-84.40) | 91.22<br>(88.14-93.88) | 134.55<br>(125.77-143.98)                                                                                | 98.08<br>(89.69-106.70) | 56.00<br>(43.27-73.73) | 41.96<br>(37.24-46.49)                                                                                                 | 34.20<br>(30.63-37.81) | 24.07<br>(19.90-29.36) |
| Syria                | 123.30<br>(92.13-159.06)                                                            | 72.40<br>(54.27-95.19)    | 53.11<br>(40.45-69.71)    | 77.06<br>(70.43-82.67)                                                                                                                                              | 89.89<br>(87.19-92.13) | 97.11<br>(96.12-97.86) | 42.48<br>(38.91-46.26)                                                                                   | 21.02<br>(19.59-22.54)  | 22.42<br>(16.20-29.32) | 17.06<br>(15.71-18.52)                                                                                                 | 10.14<br>(9.20-11.05)  | 7.14<br>(5.99-8.51)    |
| Tunisia              | 83.93<br>(65.37-105.88)                                                             | 58.42<br>(43.45-74.68)    | 39.84<br>(26.00-56.03)    | 76.00<br>(73.15-78.90)                                                                                                                                              | 92.53<br>(90.81-93.99) | 98.79<br>(98.39-99.11) | 49.34<br>(46.62-52.27)                                                                                   | 27.02<br>(24.69-29.55)  | 13.81<br>(11.52-16.53) | 21.47<br>(20.00-22.93)                                                                                                 | 14.23<br>(13.00-15.55) | 7.40<br>(5.94-9.23)    |
| Turkey               | 102.29<br>(74.04-140.02)                                                            | 47.77<br>(36.91-61.49)    | 15.57<br>(12.26-19.52)    | 75.34<br>(72.87-77.71)                                                                                                                                              | 83.16<br>(81.57-84.74) | 94.23<br>(92.41-95.71) | 70.50<br>(65.26-76.03)                                                                                   | 38.38<br>(34.37-42.71)  | 16.56<br>(12.26-22.17) | 29.00<br>(27.08-30.87)                                                                                                 | 19.14<br>(17.58-20.85) | 9.34<br>(6.53-12.71)   |
| United Arab Emirates | 31.71<br>(19.82-48.73)                                                              | 23.95<br>(16.86-32.41)    | 17.98<br>(10.70-28.26)    | 96.74<br>(95.41-97.76)                                                                                                                                              | 98.95<br>(98.51-99.29) | 99.59<br>(99.43-99.71) | 24.30<br>(14.15-38.36)                                                                                   | 12.31<br>(7.19-18.90)   | 5.49<br>(3.16-9.08)    | 13.02<br>(7.37-19.24)                                                                                                  | 6.64<br>(3.77-10.90)   | 2.93<br>(1.52-4.96)    |
| Yemen                | 395.16<br>(203.79-599.17)                                                           | 393.49<br>(210.03-655.33) | 304.71<br>(162.88-580.77) | 36.74<br>(34.59-38.97)                                                                                                                                              | 32.96<br>(29.81-35.84) | 52.32<br>(44.95-59.34) | 128.19<br>(123.42-133.21)                                                                                | 84.75<br>(81.08-88.74)  | 53.58<br>(45.87-63.24) | 41.76<br>(38.81-44.31)                                                                                                 | 31.24<br>(29.23-32.99) | 20.94<br>(19.05-23.16) |
| Bangladesh           | 581.91<br>(486.04-678.35)                                                           | 457.67<br>(361.96-552.23) | 245.13<br>(178.88-326.13) | 7.56<br>(5.14-10.72)                                                                                                                                                | 17.12<br>(14.33-20.37) | 40.65<br>(27.96-55.21) | 137.08<br>(134.10-140.07)                                                                                | 83.82<br>(81.42-86.27)  | 39.03<br>(36.05-42.67) | 59.01<br>(54.40-62.95)                                                                                                 | 41.17<br>(38.45-43.54) | 23.64<br>(21.76-25.60) |
| Bhutan               | 491.34<br>(313.08-676.13)                                                           | 346.95<br>(230.83-487.05) | 229.94<br>(137.86-353.81) | 23.46<br>(9.64-44.09)                                                                                                                                               | 35.53<br>(18.70-54.17) | 60.22<br>(41.81-77.08) | 122.22<br>(113.22-132.26)                                                                                | 82.27<br>(75.33-89.67)  | 44.07<br>(37.99-51.81) | 54.40<br>(48.56-59.83)                                                                                                 | 40.07<br>(35.98-43.91) | 25.66<br>(22.62-29.37) |
| India                | 484.42<br>(443.30-529.53)                                                           | 419.29<br>(384.48-460.06) | 248.76<br>(215.02-301.28) | 32.97<br>(22.94-44.80)                                                                                                                                              | 45.34<br>(38.52-52.82) | 76.74<br>(63.63-87.36) | 115.47<br>(112.23-118.75)                                                                                | 83.76<br>(80.31-87.17)  | 48.90<br>(42.60-56.92) | 51.92<br>(48.00-55.21)                                                                                                 | 41.92<br>(38.92-44.51) | 29.06<br>(25.84-32.76) |

**Appendix Table 1b. Unscaled values for each SDG health-related indicator by country for 1990, 2000, and 2015**

| Location     | Indicator 3.1.1: Maternal mortality ratio (maternal deaths per 100,000 live births) |                            |                             | Indicator 3.1.2: Proportion of births attended by skilled health personnel (doctors, nurses, midwives, or country-specific medical staff [e.g., clinical officers]) |                        |                        | Indicator 3.2.1: Under-5 mortality rate (probability of dying before the age of 5 per 1,000 live births) |                           |                           | Indicator 3.2.2: Neonatal mortality rate (probability of dying during the first 28 days of life per 1,000 live births) |                        |                        |
|--------------|-------------------------------------------------------------------------------------|----------------------------|-----------------------------|---------------------------------------------------------------------------------------------------------------------------------------------------------------------|------------------------|------------------------|----------------------------------------------------------------------------------------------------------|---------------------------|---------------------------|------------------------------------------------------------------------------------------------------------------------|------------------------|------------------------|
|              | 1990                                                                                | 2000                       | 2015                        | 1990                                                                                                                                                                | 2000                   | 2015                   | 1990                                                                                                     | 2000                      | 2015                      | 1990                                                                                                                   | 2000                   | 2015                   |
| Nepal        | 530.58<br>(367.51-688.94)                                                           | 347.16<br>(253.98-443.44)  | 323.09<br>(203.94-474.38)   | 8.72<br>(5.03-14.30)                                                                                                                                                | 20.22<br>(16.63-24.17) | 50.70<br>(37.11-63.41) | 136.10<br>(132.33-139.85)                                                                                | 80.55<br>(77.67-83.47)    | 36.93<br>(33.56-40.77)    | 56.65<br>(52.20-60.15)                                                                                                 | 38.52<br>(35.95-40.62) | 21.56<br>(19.63-23.45) |
| Pakistan     | 390.26<br>(299.96-487.32)                                                           | 497.46<br>(401.05-602.13)  | 348.16<br>(256.40-445.68)   | 18.59<br>(16.38-20.93)                                                                                                                                              | 34.87<br>(31.24-38.68) | 63.61<br>(55.39-71.27) | 110.58<br>(107.28-113.94)                                                                                | 90.41<br>(87.43-93.53)    | 63.00<br>(57.35-69.35)    | 56.43<br>(52.90-59.66)                                                                                                 | 49.05<br>(46.22-51.70) | 37.86<br>(34.77-41.33) |
| Botswana     | 155.24<br>(37.83-459.26)                                                            | 404.97<br>(72.03-1,709.50) | 211.47<br>(50.20-951.35)    | 81.35<br>(77.55-84.78)                                                                                                                                              | 86.36<br>(79.90-91.51) | 91.10<br>(85.57-94.92) | 53.77<br>(49.44-58.45)                                                                                   | 63.68<br>(56.23-72.70)    | 28.18<br>(22.11-36.57)    | 21.11<br>(19.22-22.95)                                                                                                 | 20.94<br>(18.70-23.27) | 14.17<br>(11.40-17.40) |
| Lesotho      | 198.98<br>(101.48-310.03)                                                           | 298.57<br>(186.47-495.24)  | 495.11<br>(198.94-1,247.69) | 48.55<br>(39.04-58.62)                                                                                                                                              | 55.55<br>(52.58-58.57) | 68.81<br>(62.29-74.89) | 91.58<br>(86.94-96.68)                                                                                   | 106.34<br>(101.16-111.92) | 83.67<br>(70.34-99.44)    | 40.00<br>(37.55-42.37)                                                                                                 | 40.02<br>(37.47-42.33) | 37.48<br>(32.64-42.98) |
| Namibia      | 189.94<br>(127.17-259.64)                                                           | 315.60<br>(182.34-471.49)  | 101.98<br>(46.93-240.55)    | 70.46<br>(67.63-73.26)                                                                                                                                              | 79.79<br>(77.62-81.63) | 86.70<br>(81.68-90.75) | 71.65<br>(67.01-76.28)                                                                                   | 63.71<br>(59.28-68.93)    | 40.52<br>(31.39-51.56)    | 28.35<br>(25.64-30.73)                                                                                                 | 25.07<br>(22.76-27.28) | 20.43<br>(16.52-25.00) |
| South Africa | 153.79<br>(129.93-179.75)                                                           | 151.40<br>(122.81-178.60)  | 157.56<br>(125.41-201.77)   | 87.77<br>(83.93-91.35)                                                                                                                                              | 91.47<br>(89.29-93.11) | 94.64<br>(91.80-96.77) | 79.59<br>(72.11-87.32)                                                                                   | 73.19<br>(66.36-79.42)    | 42.20<br>(35.83-49.68)    | 28.10<br>(25.71-30.46)                                                                                                 | 24.34<br>(22.28-26.11) | 18.17<br>(15.74-20.83) |
| Swaziland    | 124.74<br>(65.47-213.01)                                                            | 140.32<br>(86.43-254.14)   | 194.31<br>(57.41-570.95)    | 75.93<br>(67.77-82.79)                                                                                                                                              | 77.56<br>(74.59-80.40) | 83.82<br>(78.60-88.08) | 70.39<br>(66.22-75.13)                                                                                   | 93.58<br>(88.36-99.32)    | 55.04<br>(45.04-66.61)    | 22.09<br>(20.55-23.54)                                                                                                 | 22.54<br>(20.87-24.02) | 19.86<br>(17.26-22.67) |
| Zimbabwe     | 211.56<br>(156.82-274.12)                                                           | 399.34<br>(276.09-658.61)  | 303.94<br>(136.75-665.64)   | 72.41<br>(69.65-75.18)                                                                                                                                              | 75.36<br>(73.29-77.29) | 68.75<br>(62.29-74.76) | 65.62<br>(63.23-67.96)                                                                                   | 77.87<br>(75.03-80.97)    | 54.81<br>(48.09-63.31)    | 23.58<br>(21.61-25.24)                                                                                                 | 23.41<br>(21.37-25.15) | 23.40<br>(20.90-26.09) |
| Benin        | 522.02<br>(362.03-715.76)                                                           | 475.69<br>(306.05-635.22)  | 429.41<br>(153.81-1,027.42) | 72.40<br>(65.76-78.46)                                                                                                                                              | 80.71<br>(78.09-83.04) | 88.84<br>(85.72-91.55) | 180.24<br>(175.05-185.80)                                                                                | 140.01<br>(135.08-145.22) | 77.88<br>(69.51-88.30)    | 44.91<br>(39.41-50.50)                                                                                                 | 37.54<br>(33.08-41.98) | 26.59<br>(23.42-29.79) |
| Burkina Faso | 391.43<br>(288.61-492.92)                                                           | 429.89<br>(282.79-556.48)  | 351.12<br>(130.78-697.24)   | 41.59<br>(35.92-47.60)                                                                                                                                              | 46.72<br>(43.20-50.44) | 69.99<br>(62.66-77.03) | 207.73<br>(202.61-213.20)                                                                                | 177.59<br>(171.86-183.32) | 110.38<br>(100.10-123.03) | 45.53<br>(39.40-51.64)                                                                                                 | 40.29<br>(35.11-45.51) | 29.79<br>(25.65-33.98) |

**Appendix Table 1b. Unscaled values for each SDG health-related indicator by country for 1990, 2000, and 2015**

| Location      | Indicator 3.1.1: Maternal mortality ratio (maternal deaths per 100,000 live births) |                             |                             | Indicator 3.1.2: Proportion of births attended by skilled health personnel (doctors, nurses, midwives, or country-specific medical staff [e.g., clinical officers]) |                        |                        | Indicator 3.2.1: Under-5 mortality rate (probability of dying before the age of 5 per 1,000 live births) |                           |                           | Indicator 3.2.2: Neonatal mortality rate (probability of dying during the first 28 days of life per 1,000 live births) |                        |                        |
|---------------|-------------------------------------------------------------------------------------|-----------------------------|-----------------------------|---------------------------------------------------------------------------------------------------------------------------------------------------------------------|------------------------|------------------------|----------------------------------------------------------------------------------------------------------|---------------------------|---------------------------|------------------------------------------------------------------------------------------------------------------------|------------------------|------------------------|
|               | 1990                                                                                | 2000                        | 2015                        | 1990                                                                                                                                                                | 2000                   | 2015                   | 1990                                                                                                     | 2000                      | 2015                      | 1990                                                                                                                   | 2000                   | 2015                   |
| Cameroon      | 447.09<br>(334.62-549.16)                                                           | 554.81<br>(351.61-737.12)   | 486.41<br>(187.78-1,075.86) | 64.48<br>(61.82-67.28)                                                                                                                                              | 60.87<br>(58.70-62.95) | 68.85<br>(63.29-74.02) | 136.78<br>(132.33-141.33)                                                                                | 137.49<br>(132.05-143.00) | 89.76<br>(77.87-103.40)   | 37.72<br>(33.11-42.06)                                                                                                 | 39.00<br>(34.34-43.34) | 31.64<br>(27.18-35.92) |
| Cape Verde    | 93.73<br>(73.70-116.16)                                                             | 71.65<br>(48.97-116.04)     | 51.36<br>(38.38-71.79)      | 51.13<br>(39.98-61.62)                                                                                                                                              | 59.72<br>(48.72-69.85) | 71.75<br>(61.24-80.78) | 57.04<br>(54.42-59.64)                                                                                   | 44.86<br>(39.93-50.23)    | 28.16<br>(25.31-31.32)    | 23.18<br>(21.64-24.56)                                                                                                 | 20.08<br>(18.24-22.03) | 14.76<br>(13.23-16.26) |
| Chad          | 473.48<br>(317.18-626.71)                                                           | 599.21<br>(351.83-798.27)   | 542.97<br>(170.45-1,363.01) | 16.97<br>(12.87-21.97)                                                                                                                                              | 22.07<br>(19.16-25.15) | 26.34<br>(19.69-34.92) | 201.29<br>(194.65-207.57)                                                                                | 183.24<br>(175.62-191.24) | 130.50<br>(115.86-148.82) | 49.06<br>(43.29-54.86)                                                                                                 | 45.16<br>(39.94-50.50) | 36.19<br>(31.37-41.64) |
| Cote d'Ivoire | 476.94<br>(365.24-586.45)                                                           | 637.94<br>(440.19-905.76)   | 477.04<br>(170.88-940.41)   | 50.41<br>(44.33-56.26)                                                                                                                                              | 64.47<br>(61.25-67.85) | 64.27<br>(57.81-70.53) | 148.88<br>(144.20-153.65)                                                                                | 140.78<br>(134.98-146.61) | 93.49<br>(83.69-105.67)   | 48.57<br>(43.85-52.71)                                                                                                 | 46.55<br>(42.13-50.54) | 36.44<br>(32.49-40.61) |
| The Gambia    | 524.48<br>(165.23-1,129.00)                                                         | 457.58<br>(298.09-613.98)   | 353.40<br>(182.91-646.79)   | 54.59<br>(43.99-64.60)                                                                                                                                              | 57.27<br>(50.26-63.98) | 61.57<br>(50.80-70.60) | 112.71<br>(107.01-118.98)                                                                                | 85.34<br>(81.09-89.56)    | 45.39<br>(40.89-50.31)    | 36.09<br>(31.28-40.81)                                                                                                 | 30.55<br>(26.78-34.12) | 20.98<br>(18.46-23.42) |
| Ghana         | 476.42<br>(269.74-778.15)                                                           | 488.75<br>(323.78-672.22)   | 295.73<br>(119.16-700.15)   | 43.44<br>(40.08-46.72)                                                                                                                                              | 51.43<br>(48.95-54.05) | 67.22<br>(61.05-73.39) | 122.71<br>(119.50-126.55)                                                                                | 98.36<br>(95.08-101.70)   | 55.52<br>(49.76-62.70)    | 40.37<br>(35.53-44.89)                                                                                                 | 35.19<br>(31.32-38.84) | 25.26<br>(22.44-28.11) |
| Guinea        | 711.46<br>(510.28-887.12)                                                           | 688.14<br>(507.71-835.44)   | 603.27<br>(242.76-1,054.85) | 37.62<br>(30.86-44.90)                                                                                                                                              | 39.02<br>(36.08-41.84) | 52.49<br>(46.25-58.74) | 229.11<br>(222.30-236.52)                                                                                | 175.08<br>(168.89-181.33) | 108.75<br>(97.10-121.41)  | 60.32<br>(52.19-68.16)                                                                                                 | 48.35<br>(42.01-54.75) | 35.21<br>(30.58-40.06) |
| Guinea-Bissau | 507.57<br>(114.02-1,394.05)                                                         | 551.77<br>(115.88-1,592.02) | 594.08<br>(126.92-2,189.36) | 39.68<br>(29.99-51.19)                                                                                                                                              | 41.03<br>(34.76-47.79) | 42.65<br>(32.51-52.86) | 208.36<br>(196.31-220.06)                                                                                | 179.32<br>(166.64-192.13) | 123.91<br>(108.07-143.84) | 52.58<br>(44.94-60.48)                                                                                                 | 46.82<br>(39.77-53.55) | 36.79<br>(31.11-42.87) |
| Liberia       | 750.61<br>(413.09-1,093.48)                                                         | 661.37<br>(421.70-869.68)   | 606.04<br>(264.16-1,120.21) | 47.97<br>(37.40-59.38)                                                                                                                                              | 42.70<br>(36.30-49.39) | 65.29<br>(59.55-70.63) | 225.87<br>(216.95-235.55)                                                                                | 167.18<br>(161.92-172.69) | 71.39<br>(64.64-79.71)    | 56.69<br>(50.80-61.96)                                                                                                 | 45.12<br>(40.76-49.06) | 25.82<br>(23.53-28.40) |
| Mali          | 592.42<br>(472.43-708.26)                                                           | 517.46<br>(383.24-622.88)   | 346.03<br>(136.44-605.30)   | 28.74<br>(24.38-33.34)                                                                                                                                              | 43.25<br>(39.59-47.15) | 59.76<br>(52.53-66.51) | 228.96<br>(222.75-235.14)                                                                                | 192.60<br>(186.09-199.06) | 130.20<br>(115.37-148.87) | 61.84<br>(53.32-70.08)                                                                                                 | 53.54<br>(46.17-60.19) | 40.60<br>(34.58-47.11) |

**Appendix Table 1b. Unscaled values for each SDG health-related indicator by country for 1990, 2000, and 2015**

| Location              | Indicator 3.1.1: Maternal mortality ratio (maternal deaths per 100,000 live births) |                               |                             | Indicator 3.1.2: Proportion of births attended by skilled health personnel (doctors, nurses, midwives, or country-specific medical staff [e.g., clinical officers]) |                        |                        | Indicator 3.2.1: Under-5 mortality rate (probability of dying before the age of 5 per 1,000 live births) |                           |                           | Indicator 3.2.2: Neonatal mortality rate (probability of dying during the first 28 days of life per 1,000 live births) |                        |                        |
|-----------------------|-------------------------------------------------------------------------------------|-------------------------------|-----------------------------|---------------------------------------------------------------------------------------------------------------------------------------------------------------------|------------------------|------------------------|----------------------------------------------------------------------------------------------------------|---------------------------|---------------------------|------------------------------------------------------------------------------------------------------------------------|------------------------|------------------------|
|                       | 1990                                                                                | 2000                          | 2015                        | 1990                                                                                                                                                                | 2000                   | 2015                   | 1990                                                                                                     | 2000                      | 2015                      | 1990                                                                                                                   | 2000                   | 2015                   |
| Mauritania            | 776.74<br>(612.51-981.56)                                                           | 596.72<br>(304.94-774.90)     | 427.38<br>(148.82-823.94)   | 54.99<br>(46.86-62.11)                                                                                                                                              | 57.51<br>(54.95-59.87) | 66.39<br>(58.06-74.32) | 108.80<br>(104.36-113.10)                                                                                | 92.52<br>(88.28-96.67)    | 55.04<br>(49.28-62.23)    | 40.56<br>(35.98-44.82)                                                                                                 | 36.82<br>(32.70-40.45) | 26.53<br>(23.63-29.87) |
| Niger                 | 432.95<br>(298.75-596.72)                                                           | 464.88<br>(324.24-621.37)     | 369.84<br>(163.70-638.14)   | 17.28<br>(14.49-20.60)                                                                                                                                              | 20.85<br>(18.15-24.02) | 36.13<br>(29.70-43.11) | 296.08<br>(288.57-303.94)                                                                                | 223.68<br>(216.23-231.35) | 112.77<br>(101.27-127.06) | 50.66<br>(42.08-58.16)                                                                                                 | 39.07<br>(32.36-45.01) | 24.08<br>(20.11-27.87) |
| Nigeria               | 469.79<br>(222.92-797.34)                                                           | 470.65<br>(305.83-638.70)     | 282.81<br>(158.35-601.36)   | 37.48<br>(32.83-42.20)                                                                                                                                              | 41.62<br>(37.58-45.56) | 46.62<br>(41.28-52.18) | 207.88<br>(201.67-214.16)                                                                                | 183.06<br>(177.12-189.01) | 103.84<br>(92.56-116.27)  | 51.77<br>(44.54-58.58)                                                                                                 | 48.35<br>(41.81-54.30) | 34.59<br>(30.11-39.16) |
| Sao Tome and Principe | 229.00<br>(155.90-317.60)                                                           | 267.68<br>(204.71-348.74)     | 164.08<br>(64.96-368.33)    | 80.15<br>(71.96-86.35)                                                                                                                                              | 82.61<br>(78.51-86.44) | 86.29<br>(81.42-90.18) | 106.29<br>(101.59-110.96)                                                                                | 76.75<br>(71.54-82.20)    | 38.29<br>(33.27-44.15)    | 31.87<br>(27.98-35.53)                                                                                                 | 26.70<br>(23.79-29.58) | 17.57<br>(15.29-19.81) |
| Senegal               | 465.29<br>(332.09-579.71)                                                           | 482.77<br>(326.29-603.27)     | 453.17<br>(165.08-1,036.30) | 47.32<br>(43.39-51.67)                                                                                                                                              | 67.69<br>(64.29-70.82) | 76.71<br>(71.70-81.05) | 144.23<br>(140.95-147.83)                                                                                | 117.63<br>(114.35-121.06) | 52.25<br>(48.23-57.16)    | 39.57<br>(34.14-44.64)                                                                                                 | 34.74<br>(30.14-39.00) | 21.00<br>(18.64-23.35) |
| Sierra Leone          | 366.13<br>(163.04-710.15)                                                           | 570.81<br>(410.27-735.63)     | 693.46<br>(320.36-1,230.44) | 44.28<br>(33.61-54.32)                                                                                                                                              | 43.96<br>(38.29-49.47) | 63.55<br>(57.20-69.64) | 245.64<br>(238.57-253.63)                                                                                | 210.36<br>(204.52-216.51) | 122.40<br>(113.03-132.22) | 58.94<br>(52.22-65.23)                                                                                                 | 52.37<br>(46.57-57.74) | 35.78<br>(31.99-39.48) |
| Togo                  | 442.92<br>(292.98-567.51)                                                           | 473.22<br>(278.53-643.76)     | 298.43<br>(124.19-564.73)   | 46.69<br>(42.59-50.82)                                                                                                                                              | 55.57<br>(52.06-59.14) | 69.08<br>(61.80-75.09) | 144.53<br>(139.63-149.59)                                                                                | 123.00<br>(117.62-128.38) | 78.04<br>(71.17-86.48)    | 41.81<br>(36.36-47.08)                                                                                                 | 37.62<br>(32.73-42.29) | 29.74<br>(26.30-33.20) |
| Burundi               | 1,108.35<br>(499.85-2,082.98)                                                       | 1,026.59<br>(698.42-1,420.44) | 387.16<br>(156.21-786.10)   | 23.07<br>(16.17-30.98)                                                                                                                                              | 41.46<br>(32.23-50.88) | 65.56<br>(52.08-77.51) | 173.41<br>(161.55-184.97)                                                                                | 165.89<br>(153.86-178.38) | 76.81<br>(57.35-104.34)   | 41.82<br>(36.18-47.21)                                                                                                 | 41.00<br>(35.41-46.55) | 25.57<br>(20.60-31.89) |
| Comoros               | 578.77<br>(229.74-1,075.32)                                                         | 467.54<br>(347.87-606.91)     | 212.77<br>(99.92-404.93)    | 54.36<br>(41.58-66.38)                                                                                                                                              | 71.12<br>(65.36-76.56) | 85.22<br>(78.60-90.26) | 120.20<br>(112.10-128.60)                                                                                | 85.41<br>(71.38-99.61)    | 44.02<br>(30.70-61.97)    | 44.06<br>(39.91-47.97)                                                                                                 | 34.97<br>(30.18-39.95) | 22.39<br>(16.82-29.22) |
| Djibouti              | 372.66<br>(151.14-685.76)                                                           | 517.32<br>(188.92-1,228.11)   | 481.89<br>(190.90-1,350.21) | 76.80<br>(62.82-88.13)                                                                                                                                              | 81.09<br>(72.56-87.60) | 90.56<br>(83.72-94.91) | 112.76<br>(105.32-120.10)                                                                                | 102.24<br>(93.83-111.13)  | 65.50<br>(55.36-78.65)    | 31.52<br>(27.40-35.20)                                                                                                 | 29.95<br>(26.34-33.27) | 23.42<br>(20.34-26.98) |

**Appendix Table 1b. Unscaled values for each SDG health-related indicator by country for 1990, 2000, and 2015**

| Location    | Indicator 3.1.1: Maternal mortality ratio (maternal deaths per 100,000 live births) |                             |                             | Indicator 3.1.2: Proportion of births attended by skilled health personnel (doctors, nurses, midwives, or country-specific medical staff [e.g., clinical officers]) |                        |                        | Indicator 3.2.1: Under-5 mortality rate (probability of dying before the age of 5 per 1,000 live births) |                           |                          | Indicator 3.2.2: Neonatal mortality rate (probability of dying during the first 28 days of life per 1,000 live births) |                        |                        |
|-------------|-------------------------------------------------------------------------------------|-----------------------------|-----------------------------|---------------------------------------------------------------------------------------------------------------------------------------------------------------------|------------------------|------------------------|----------------------------------------------------------------------------------------------------------|---------------------------|--------------------------|------------------------------------------------------------------------------------------------------------------------|------------------------|------------------------|
|             | 1990                                                                                | 2000                        | 2015                        | 1990                                                                                                                                                                | 2000                   | 2015                   | 1990                                                                                                     | 2000                      | 2015                     | 1990                                                                                                                   | 2000                   | 2015                   |
| Eritrea     | 808.46<br>(601.74-1,093.37)                                                         | 638.55<br>(256.60-1,217.17) | 747.13<br>(195.92-1,852.86) | 18.37<br>(14.08-23.85)                                                                                                                                              | 29.21<br>(26.60-32.00) | 32.89<br>(19.17-49.61) | 147.45<br>(140.33-154.62)                                                                                | 133.99<br>(91.65-192.79)  | 67.15<br>(54.57-83.95)   | 34.70<br>(29.97-39.24)                                                                                                 | 30.48<br>(24.12-38.27) | 22.13<br>(18.82-26.31) |
| Ethiopia    | 788.57<br>(594.63-1,036.76)                                                         | 741.94<br>(555.85-956.47)   | 404.06<br>(171.42-877.12)   | 10.36<br>(5.49-16.80)                                                                                                                                               | 12.69<br>(9.39-16.52)  | 20.64<br>(12.46-30.55) | 202.24<br>(195.85-208.88)                                                                                | 143.12<br>(138.13-147.83) | 60.27<br>(53.72-68.47)   | 58.83<br>(51.78-65.01)                                                                                                 | 44.32<br>(39.46-48.76) | 25.44<br>(22.52-28.47) |
| Kenya       | 366.74<br>(290.40-460.77)                                                           | 501.17<br>(402.23-629.27)   | 334.77<br>(258.32-425.68)   | 51.30<br>(46.36-56.10)                                                                                                                                              | 51.46<br>(47.55-55.59) | 54.66<br>(39.61-68.79) | 92.29<br>(88.88-95.40)                                                                                   | 88.56<br>(84.78-92.67)    | 50.83<br>(45.37-57.64)   | 28.53<br>(26.01-30.76)                                                                                                 | 27.05<br>(24.88-29.21) | 21.10<br>(19.16-23.16) |
| Madagascar  | 375.41<br>(301.18-445.77)                                                           | 422.44<br>(151.96-572.71)   | 329.61<br>(110.22-713.58)   | 57.79<br>(54.41-61.46)                                                                                                                                              | 46.73<br>(43.86-49.70) | 47.34<br>(35.58-59.61) | 143.12<br>(135.08-151.04)                                                                                | 107.08<br>(99.82-115.23)  | 64.20<br>(51.93-80.64)   | 36.60<br>(32.62-40.51)                                                                                                 | 30.63<br>(27.50-33.65) | 22.94<br>(19.43-27.00) |
| Malawi      | 504.25<br>(369.34-631.48)                                                           | 583.07<br>(390.05-895.51)   | 216.92<br>(88.56-435.97)    | 58.37<br>(51.68-65.22)                                                                                                                                              | 63.85<br>(59.75-67.90) | 77.51<br>(68.03-85.71) | 224.22<br>(214.23-234.60)                                                                                | 166.84<br>(158.71-175.22) | 83.35<br>(70.24-98.43)   | 51.61<br>(45.15-57.50)                                                                                                 | 37.97<br>(33.23-42.37) | 26.86<br>(23.16-31.10) |
| Mozambique  | 345.31<br>(233.23-472.72)                                                           | 342.86<br>(195.78-455.85)   | 323.90<br>(116.19-793.30)   | 45.36<br>(35.77-55.44)                                                                                                                                              | 49.48<br>(47.65-51.26) | 63.58<br>(56.11-70.60) | 214.22<br>(208.68-220.13)                                                                                | 157.46<br>(152.70-162.31) | 77.93<br>(70.40-87.26)   | 53.91<br>(48.38-58.65)                                                                                                 | 40.36<br>(36.41-43.71) | 25.45<br>(23.10-27.87) |
| Rwanda      | 660.80<br>(485.77-913.96)                                                           | 762.95<br>(591.68-999.52)   | 367.42<br>(159.05-786.24)   | 31.92<br>(24.05-39.97)                                                                                                                                              | 36.85<br>(30.65-43.30) | 78.49<br>(67.82-86.72) | 154.43<br>(146.27-162.85)                                                                                | 158.50<br>(149.80-167.12) | 65.64<br>(53.52-81.81)   | 40.59<br>(35.37-45.26)                                                                                                 | 42.27<br>(37.28-47.19) | 24.85<br>(21.01-29.38) |
| Somalia     | 822.90<br>(136.56-2,183.07)                                                         | 803.78<br>(133.79-2,059.85) | 723.71<br>(137.01-2,210.18) | 34.36<br>(19.36-52.85)                                                                                                                                              | 32.76<br>(21.97-45.59) | 36.46<br>(22.44-52.60) | 187.46<br>(177.06-198.24)                                                                                | 159.00<br>(149.81-167.74) | 112.16<br>(97.48-130.39) | 44.92<br>(39.54-50.01)                                                                                                 | 39.68<br>(35.09-43.82) | 31.28<br>(27.23-35.85) |
| South Sudan | 582.57<br>(113.48-1,559.78)                                                         | 568.57<br>(109.80-1,721.82) | 637.07<br>(131.31-2,333.01) | 40.46<br>(23.16-60.32)                                                                                                                                              | 39.65<br>(26.25-55.50) | 45.04<br>(32.54-57.02) | 200.11<br>(187.40-213.31)                                                                                | 140.45<br>(132.41-149.48) | 107.03<br>(89.37-127.29) | 45.56<br>(40.58-50.73)                                                                                                 | 34.06<br>(30.28-37.50) | 28.45<br>(24.17-33.21) |
| Tanzania    | 537.15<br>(409.49-647.92)                                                           | 491.64<br>(340.95-666.20)   | 332.81<br>(127.50-831.34)   | 56.66<br>(53.84-59.28)                                                                                                                                              | 47.88<br>(45.16-50.77) | 58.83<br>(48.10-68.90) | 155.17<br>(151.18-159.19)                                                                                | 121.48<br>(117.34-125.64) | 60.08<br>(52.89-69.16)   | 39.06<br>(35.29-42.51)                                                                                                 | 32.35<br>(29.71-34.97) | 22.07<br>(19.87-24.64) |

**Appendix Table 1b. Unscaled values for each SDG health-related indicator by country for 1990, 2000, and 2015**

| Location                         | Indicator 3.1.1: Maternal mortality ratio (maternal deaths per 100,000 live births) |                               |                               | Indicator 3.1.2: Proportion of births attended by skilled health personnel (doctors, nurses, midwives, or country-specific medical staff [e.g., clinical officers]) |                        |                        | Indicator 3.2.1: Under-5 mortality rate (probability of dying before the age of 5 per 1,000 live births) |                           |                          | Indicator 3.2.2: Neonatal mortality rate (probability of dying during the first 28 days of life per 1,000 live births) |                        |                        |
|----------------------------------|-------------------------------------------------------------------------------------|-------------------------------|-------------------------------|---------------------------------------------------------------------------------------------------------------------------------------------------------------------|------------------------|------------------------|----------------------------------------------------------------------------------------------------------|---------------------------|--------------------------|------------------------------------------------------------------------------------------------------------------------|------------------------|------------------------|
|                                  | 1990                                                                                | 2000                          | 2015                          | 1990                                                                                                                                                                | 2000                   | 2015                   | 1990                                                                                                     | 2000                      | 2015                     | 1990                                                                                                                   | 2000                   | 2015                   |
| Uganda                           | 336.77<br>(236.44-440.11)                                                           | 407.05<br>(295.59-552.81)     | 278.43<br>(103.70-605.71)     | 40.79<br>(37.42-44.45)                                                                                                                                              | 43.93<br>(40.68-47.01) | 70.14<br>(61.98-77.40) | 167.93<br>(163.67-172.44)                                                                                | 130.97<br>(126.88-135.15) | 69.35<br>(62.82-77.42)   | 38.70<br>(34.56-42.78)                                                                                                 | 33.38<br>(29.97-36.73) | 24.13<br>(21.82-26.64) |
| Zambia                           | 351.36<br>(264.25-441.55)                                                           | 420.60<br>(304.66-597.08)     | 244.38<br>(100.49-494.97)     | 53.34<br>(48.31-57.85)                                                                                                                                              | 51.84<br>(48.60-55.34) | 75.11<br>(68.49-81.08) | 168.91<br>(161.09-177.34)                                                                                | 147.30<br>(137.62-156.69) | 65.93<br>(55.36-78.00)   | 36.71<br>(32.08-40.86)                                                                                                 | 30.95<br>(26.94-34.78) | 21.06<br>(18.28-24.06) |
| Angola                           | 685.33<br>(131.53-1,740.35)                                                         | 645.90<br>(114.88-1,857.76)   | 513.72<br>(109.68-1,821.01)   | 40.96<br>(33.30-48.84)                                                                                                                                              | 47.49<br>(44.13-50.85) | 74.35<br>(67.78-80.19) | 190.46<br>(172.22-210.74)                                                                                | 155.77<br>(141.10-172.43) | 78.70<br>(60.29-100.90)  | 40.62<br>(33.80-47.11)                                                                                                 | 35.53<br>(30.23-41.02) | 23.49<br>(19.28-28.33) |
| Central African Republic         | 893.39<br>(671.18-1,197.77)                                                         | 1,024.75<br>(314.75-2,240.09) | 1,073.91<br>(213.07-2,860.66) | 51.61<br>(46.72-56.35)                                                                                                                                              | 50.15<br>(46.38-54.21) | 63.11<br>(56.84-69.57) | 178.14<br>(164.66-192.88)                                                                                | 164.93<br>(147.17-184.63) | 126.78<br>(98.04-165.85) | 48.64<br>(42.40-54.94)                                                                                                 | 44.86<br>(38.57-50.83) | 40.19<br>(32.17-49.92) |
| Congo                            | 436.28<br>(255.26-710.86)                                                           | 637.95<br>(416.56-926.27)     | 484.03<br>(181.14-1,021.00)   | 91.99<br>(88.54-94.62)                                                                                                                                              | 92.57<br>(90.47-94.30) | 95.67<br>(94.29-96.82) | 93.35<br>(87.29-99.37)                                                                                   | 109.38<br>(101.70-118.22) | 56.13<br>(44.35-70.14)   | 25.70<br>(22.00-29.13)                                                                                                 | 29.79<br>(25.61-33.79) | 21.23<br>(17.52-25.16) |
| Democratic Republic of the Congo | 370.56<br>(175.89-571.08)                                                           | 318.44<br>(223.52-413.09)     | 467.14<br>(208.33-824.69)     | 67.84<br>(58.95-75.71)                                                                                                                                              | 70.30<br>(65.71-74.22) | 87.34<br>(84.82-89.54) | 166.62<br>(154.87-178.44)                                                                                | 151.83<br>(140.18-163.69) | 88.04<br>(70.19-108.92)  | 38.25<br>(33.10-43.29)                                                                                                 | 36.73<br>(31.97-41.55) | 27.30<br>(22.82-32.32) |
| Equatorial Guinea                | 913.13<br>(164.80-2,389.19)                                                         | 676.43<br>(125.46-2,101.88)   | 408.99<br>(106.68-1,516.66)   | 41.73<br>(31.86-52.19)                                                                                                                                              | 69.28<br>(61.92-76.71) | 92.31<br>(89.02-94.88) | 170.77<br>(154.18-188.52)                                                                                | 159.21<br>(140.47-179.60) | 87.51<br>(65.48-118.55)  | 44.05<br>(37.21-50.79)                                                                                                 | 42.79<br>(36.41-49.05) | 30.05<br>(24.16-37.70) |
| Gabon                            | 309.11<br>(225.96-421.12)                                                           | 408.00<br>(272.42-586.01)     | 191.12<br>(83.59-382.33)      | 85.87<br>(81.85-89.27)                                                                                                                                              | 88.97<br>(87.53-90.34) | 94.62<br>(93.33-95.71) | 83.27<br>(79.32-87.80)                                                                                   | 71.39<br>(67.71-75.29)    | 46.11<br>(40.23-52.69)   | 29.82<br>(26.55-32.58)                                                                                                 | 27.50<br>(24.86-29.86) | 21.66<br>(19.24-24.12) |

**Appendix Table 1b. Unscaled values for each SDG health-related indicator by country for 1990, 2000, and 2015**

| Location      | Indicator 3.3.1: Age-standardised rate of new HIV infections (per 1,000 population) |                     |                     | Indicator 3.3.2: Age-standardised rate of new and relapsed TB cases (per 1,000 population) |                     |                     | Indicator 3.3.3: Age-standardised rate of malaria cases (per 1,000 population) |                     |                     | Indicator 3.3.4: Age-standardised rate of hepatitis B incident cases (per 100,000 population) |                                 |                                 |
|---------------|-------------------------------------------------------------------------------------|---------------------|---------------------|--------------------------------------------------------------------------------------------|---------------------|---------------------|--------------------------------------------------------------------------------|---------------------|---------------------|-----------------------------------------------------------------------------------------------|---------------------------------|---------------------------------|
|               | 1990                                                                                | 2000                | 2015                | 1990                                                                                       | 2000                | 2015                | 1990                                                                           | 2000                | 2015                | 1990                                                                                          | 2000                            | 2015                            |
| Canada        | 0.12<br>(0.07-0.19)                                                                 | 0.05<br>(0.03-0.07) | 0.03<br>(0.01-0.08) | 0.09<br>(0.08-0.11)                                                                        | 0.08<br>(0.07-0.09) | 0.06<br>(0.05-0.07) | 0.00<br>(0.00-0.00)                                                            | 0.00<br>(0.00-0.00) | 0.00<br>(0.00-0.00) | 1,077.66<br>(968.30-1,211.90)                                                                 | 1,078.52<br>(967.68-1,202.74)   | 1,096.81<br>(975.22-1,224.15)   |
| United States | 0.22<br>(0.19-0.26)                                                                 | 0.10<br>(0.09-0.12) | 0.07<br>(0.06-0.09) | 0.13<br>(0.11-0.16)                                                                        | 0.06<br>(0.05-0.06) | 0.04<br>(0.03-0.05) | 0.00<br>(0.00-0.00)                                                            | 0.00<br>(0.00-0.00) | 0.00<br>(0.00-0.00) | 732.52<br>(662.21-825.87)                                                                     | 727.59<br>(655.63-812.78)       | 738.33<br>(658.42-830.70)       |
| Australia     | 0.05<br>(0.03-0.09)                                                                 | 0.03<br>(0.01-0.05) | 0.02<br>(0.01-0.03) | 0.10<br>(0.08-0.12)                                                                        | 0.07<br>(0.06-0.08) | 0.08<br>(0.06-0.09) | 0.00<br>(0.00-0.00)                                                            | 0.00<br>(0.00-0.00) | 0.00<br>(0.00-0.00) | 1,155.69<br>(1,038.21-1,294.86)                                                               | 1,149.04<br>(1,029.47-1,283.51) | 1,160.83<br>(1,030.25-1,302.52) |
| New Zealand   | 0.03<br>(0.02-0.04)                                                                 | 0.03<br>(0.01-0.05) | 0.02<br>(0.01-0.03) | 0.15<br>(0.13-0.18)                                                                        | 0.10<br>(0.09-0.12) | 0.08<br>(0.07-0.10) | 0.00<br>(0.00-0.00)                                                            | 0.00<br>(0.00-0.00) | 0.00<br>(0.00-0.00) | 1,304.59<br>(1,164.31-1,467.53)                                                               | 1,301.79<br>(1,168.50-1,459.18) | 1,302.46<br>(1,149.22-1,466.87) |
| Brunei        | 0.04<br>(0.01-0.09)                                                                 | 0.05<br>(0.02-0.16) | 0.03<br>(0.01-0.06) | 1.32<br>(1.21-1.44)                                                                        | 0.99<br>(0.90-1.08) | 0.77<br>(0.69-0.86) | 0.00<br>(0.00-0.00)                                                            | 0.00<br>(0.00-0.00) | 0.00<br>(0.00-0.00) | 1,480.49<br>(1,270.05-1,730.82)                                                               | 1,470.78<br>(1,259.36-1,710.18) | 1,482.52<br>(1,261.25-1,698.31) |
| Japan         | 0.01<br>(0.01-0.01)                                                                 | 0.01<br>(0.00-0.01) | 0.01<br>(0.00-0.01) | 0.34<br>(0.29-0.39)                                                                        | 0.24<br>(0.20-0.28) | 0.16<br>(0.14-0.17) | 0.00<br>(0.00-0.00)                                                            | 0.00<br>(0.00-0.00) | 0.00<br>(0.00-0.00) | 1,339.04<br>(1,199.81-1,502.38)                                                               | 1,341.39<br>(1,202.60-1,505.75) | 1,350.78<br>(1,198.81-1,519.61) |
| Singapore     | 0.07<br>(0.05-0.12)                                                                 | 0.06<br>(0.05-0.07) | 0.03<br>(0.02-0.04) | 0.81<br>(0.74-0.87)                                                                        | 0.61<br>(0.56-0.65) | 0.48<br>(0.42-0.53) | 0.00<br>(0.00-0.00)                                                            | 0.00<br>(0.00-0.00) | 0.00<br>(0.00-0.00) | 1,343.22<br>(1,198.24-1,511.17)                                                               | 1,339.62<br>(1,196.66-1,505.74) | 1,341.00<br>(1,198.99-1,507.58) |
| South Korea   | 0.03<br>(0.03-0.04)                                                                 | 0.03<br>(0.02-0.07) | 0.01<br>(0.01-0.02) | 2.24<br>(2.05-2.39)                                                                        | 0.94<br>(0.87-1.01) | 0.72<br>(0.66-0.77) | 0.24<br>(0.04-0.44)                                                            | 0.09<br>(0.09-0.10) | 0.01<br>(0.01-0.01) | 1,750.01<br>(1,559.45-1,975.59)                                                               | 1,751.78<br>(1,562.85-1,975.40) | 1,738.45<br>(1,534.77-1,952.09) |
| Andorra       | 0.34<br>(0.02-2.48)                                                                 | 0.07<br>(0.02-0.29) | 0.05<br>(0.01-0.18) | 0.19<br>(0.15-0.25)                                                                        | 0.20<br>(0.15-0.25) | 0.20<br>(0.15-0.27) | 0.00<br>(0.00-0.00)                                                            | 0.00<br>(0.00-0.00) | 0.00<br>(0.00-0.00) | 833.66<br>(676.22-1,021.09)                                                                   | 833.94<br>(666.58-1,032.47)     | 838.71<br>(673.91-1,035.86)     |
| Austria       | 0.08<br>(0.01-0.20)                                                                 | 0.06<br>(0.02-0.15) | 0.04<br>(0.01-0.08) | 0.24<br>(0.21-0.28)                                                                        | 0.15<br>(0.13-0.16) | 0.10<br>(0.08-0.12) | 0.00<br>(0.00-0.00)                                                            | 0.00<br>(0.00-0.00) | 0.00<br>(0.00-0.00) | 832.46<br>(674.50-1,020.35)                                                                   | 833.18<br>(666.13-1,030.91)     | 837.67<br>(673.20-1,035.27)     |

**Appendix Table 1b. Unscaled values for each SDG health-related indicator by country for 1990, 2000, and 2015**

| Location | Indicator 3.3.1: Age-standardised rate of new HIV infections (per 1,000 population) |                     |                     | Indicator 3.3.2: Age-standardised rate of new and relapsed TB cases (per 1,000 population) |                     |                     | Indicator 3.3.3: Age-standardised rate of malaria cases (per 1,000 population) |                     |                     | Indicator 3.3.4: Age-standardised rate of hepatitis B incident cases (per 100,000 population) |                             |                             |
|----------|-------------------------------------------------------------------------------------|---------------------|---------------------|--------------------------------------------------------------------------------------------|---------------------|---------------------|--------------------------------------------------------------------------------|---------------------|---------------------|-----------------------------------------------------------------------------------------------|-----------------------------|-----------------------------|
|          | 1990                                                                                | 2000                | 2015                | 1990                                                                                       | 2000                | 2015                | 1990                                                                           | 2000                | 2015                | 1990                                                                                          | 2000                        | 2015                        |
| Belgium  | 0.08<br>(0.04-0.16)                                                                 | 0.05<br>(0.02-0.10) | 0.02<br>(0.01-0.05) | 0.19<br>(0.16-0.22)                                                                        | 0.14<br>(0.12-0.15) | 0.11<br>(0.09-0.12) | 0.00<br>(0.00-0.00)                                                            | 0.00<br>(0.00-0.00) | 0.00<br>(0.00-0.00) | 783.13<br>(696.63-886.96)                                                                     | 780.45<br>(700.20-875.24)   | 786.18<br>(700.22-885.23)   |
| Cyprus   | 0.02<br>(0.01-0.04)                                                                 | 0.02<br>(0.01-0.06) | 0.02<br>(0.00-0.04) | 0.08<br>(0.06-0.11)                                                                        | 0.08<br>(0.06-0.10) | 0.08<br>(0.07-0.11) | 0.00<br>(0.00-0.00)                                                            | 0.00<br>(0.00-0.00) | 0.00<br>(0.00-0.00) | 825.03<br>(737.17-926.45)                                                                     | 826.82<br>(739.93-924.85)   | 827.66<br>(734.65-924.81)   |
| Denmark  | 0.10<br>(0.05-0.15)                                                                 | 0.07<br>(0.03-0.12) | 0.03<br>(0.01-0.06) | 0.14<br>(0.11-0.16)                                                                        | 0.12<br>(0.10-0.14) | 0.08<br>(0.07-0.10) | 0.00<br>(0.00-0.00)                                                            | 0.00<br>(0.00-0.00) | 0.00<br>(0.00-0.00) | 796.09<br>(715.20-896.46)                                                                     | 793.55<br>(710.97-889.51)   | 802.29<br>(712.42-897.47)   |
| Finland  | 0.01<br>(0.01-0.02)                                                                 | 0.01<br>(0.01-0.03) | 0.01<br>(0.00-0.02) | 0.21<br>(0.19-0.25)                                                                        | 0.14<br>(0.12-0.16) | 0.09<br>(0.08-0.11) | 0.00<br>(0.00-0.00)                                                            | 0.00<br>(0.00-0.00) | 0.00<br>(0.00-0.00) | 833.69<br>(675.41-1,022.36)                                                                   | 834.52<br>(666.90-1,033.25) | 840.08<br>(674.59-1,038.69) |
| France   | 0.21<br>(0.16-0.28)                                                                 | 0.07<br>(0.05-0.12) | 0.02<br>(0.01-0.04) | 0.60<br>(0.53-0.68)                                                                        | 0.22<br>(0.20-0.25) | 0.12<br>(0.10-0.13) | 0.00<br>(0.00-0.00)                                                            | 0.00<br>(0.00-0.00) | 0.00<br>(0.00-0.00) | 784.77<br>(700.90-884.54)                                                                     | 781.78<br>(701.98-867.03)   | 785.62<br>(695.68-882.94)   |
| Germany  | 0.04<br>(0.03-0.07)                                                                 | 0.02<br>(0.01-0.04) | 0.02<br>(0.01-0.05) | 0.21<br>(0.18-0.25)                                                                        | 0.12<br>(0.10-0.14) | 0.08<br>(0.06-0.10) | 0.00<br>(0.00-0.00)                                                            | 0.00<br>(0.00-0.00) | 0.00<br>(0.00-0.00) | 744.55<br>(666.30-840.41)                                                                     | 740.95<br>(664.54-827.52)   | 750.43<br>(668.69-843.19)   |
| Greece   | 0.03<br>(0.02-0.03)                                                                 | 0.01<br>(0.01-0.01) | 0.01<br>(0.01-0.01) | 0.19<br>(0.16-0.22)                                                                        | 0.10<br>(0.09-0.11) | 0.09<br>(0.08-0.11) | 0.00<br>(0.00-0.00)                                                            | 0.00<br>(0.00-0.00) | 0.00<br>(0.00-0.00) | 945.86<br>(844.46-1,063.74)                                                                   | 946.18<br>(846.36-1,066.09) | 944.61<br>(839.29-1,064.69) |
| Iceland  | 0.05<br>(0.02-0.09)                                                                 | 0.03<br>(0.02-0.05) | 0.02<br>(0.01-0.05) | 0.25<br>(0.20-0.29)                                                                        | 0.27<br>(0.23-0.32) | 0.22<br>(0.17-0.27) | 0.00<br>(0.00-0.00)                                                            | 0.00<br>(0.00-0.00) | 0.00<br>(0.00-0.00) | 836.16<br>(678.38-1,024.31)                                                                   | 835.33<br>(668.34-1,033.49) | 836.95<br>(673.02-1,033.03) |
| Ireland  | 0.08<br>(0.05-0.13)                                                                 | 0.03<br>(0.02-0.06) | 0.02<br>(0.01-0.04) | 0.24<br>(0.21-0.27)                                                                        | 0.15<br>(0.13-0.16) | 0.11<br>(0.10-0.13) | 0.00<br>(0.00-0.00)                                                            | 0.00<br>(0.00-0.00) | 0.00<br>(0.00-0.00) | 834.35<br>(677.48-1,020.86)                                                                   | 834.12<br>(667.64-1,033.24) | 834.63<br>(670.65-1,029.55) |
| Israel   | 0.05<br>(0.03-0.10)                                                                 | 0.03<br>(0.02-0.07) | 0.03<br>(0.01-0.05) | 0.15<br>(0.12-0.18)                                                                        | 0.12<br>(0.10-0.13) | 0.10<br>(0.08-0.12) | 0.00<br>(0.00-0.00)                                                            | 0.00<br>(0.00-0.00) | 0.00<br>(0.00-0.00) | 834.13<br>(677.13-1,019.75)                                                                   | 831.98<br>(666.30-1,028.16) | 837.65<br>(673.22-1,033.90) |

**Appendix Table 1b. Unscaled values for each SDG health-related indicator by country for 1990, 2000, and 2015**

| Location       | Indicator 3.3.1: Age-standardised rate of new HIV infections (per 1,000 population) |                     |                     | Indicator 3.3.2: Age-standardised rate of new and relapsed TB cases (per 1,000 population) |                     |                     | Indicator 3.3.3: Age-standardised rate of malaria cases (per 1,000 population) |                     |                     | Indicator 3.3.4: Age-standardised rate of hepatitis B incident cases (per 100,000 population) |                             |                             |
|----------------|-------------------------------------------------------------------------------------|---------------------|---------------------|--------------------------------------------------------------------------------------------|---------------------|---------------------|--------------------------------------------------------------------------------|---------------------|---------------------|-----------------------------------------------------------------------------------------------|-----------------------------|-----------------------------|
|                | 1990                                                                                | 2000                | 2015                | 1990                                                                                       | 2000                | 2015                | 1990                                                                           | 2000                | 2015                | 1990                                                                                          | 2000                        | 2015                        |
| Italy          | 0.24<br>(0.08-0.58)                                                                 | 0.06<br>(0.03-0.12) | 0.03<br>(0.01-0.07) | 0.18<br>(0.15-0.21)                                                                        | 0.10<br>(0.09-0.12) | 0.08<br>(0.06-0.09) | 0.00<br>(0.00-0.00)                                                            | 0.00<br>(0.00-0.00) | 0.00<br>(0.00-0.00) | 802.35<br>(719.10-904.84)                                                                     | 801.53<br>(719.29-894.76)   | 809.35<br>(722.54-908.94)   |
| Luxembourg     | 0.06<br>(0.03-0.13)                                                                 | 0.03<br>(0.01-0.06) | 0.03<br>(0.01-0.05) | 0.16<br>(0.13-0.19)                                                                        | 0.13<br>(0.11-0.16) | 0.14<br>(0.10-0.18) | 0.00<br>(0.00-0.00)                                                            | 0.00<br>(0.00-0.00) | 0.00<br>(0.00-0.00) | 834.85<br>(677.14-1,023.69)                                                                   | 834.64<br>(667.43-1,033.56) | 839.67<br>(674.58-1,037.15) |
| Malta          | 0.05<br>(0.03-0.10)                                                                 | 0.03<br>(0.02-0.05) | 0.03<br>(0.01-0.06) | 0.14<br>(0.11-0.17)                                                                        | 0.17<br>(0.14-0.21) | 0.17<br>(0.13-0.21) | 0.00<br>(0.00-0.00)                                                            | 0.00<br>(0.00-0.00) | 0.00<br>(0.00-0.00) | 832.21<br>(674.98-1,016.99)                                                                   | 834.42<br>(667.67-1,032.16) | 841.79<br>(676.47-1,042.74) |
| Netherlands    | 0.14<br>(0.09-0.25)                                                                 | 0.04<br>(0.02-0.07) | 0.02<br>(0.01-0.03) | 0.20<br>(0.17-0.24)                                                                        | 0.12<br>(0.10-0.14) | 0.08<br>(0.07-0.09) | 0.00<br>(0.00-0.00)                                                            | 0.00<br>(0.00-0.00) | 0.00<br>(0.00-0.00) | 796.09<br>(712.15-898.96)                                                                     | 803.01<br>(714.82-907.11)   | 804.80<br>(716.81-904.58)   |
| Norway         | 0.06<br>(0.03-0.12)                                                                 | 0.02<br>(0.01-0.05) | 0.01<br>(0.00-0.02) | 0.15<br>(0.13-0.18)                                                                        | 0.14<br>(0.12-0.16) | 0.10<br>(0.09-0.12) | 0.00<br>(0.00-0.00)                                                            | 0.00<br>(0.00-0.00) | 0.00<br>(0.00-0.00) | 836.16<br>(678.20-1,024.66)                                                                   | 835.80<br>(668.27-1,035.09) | 841.57<br>(675.94-1,040.61) |
| Portugal       | 0.51<br>(0.25-0.94)                                                                 | 0.63<br>(0.29-1.20) | 0.23<br>(0.08-0.48) | 0.69<br>(0.62-0.77)                                                                        | 0.73<br>(0.66-0.80) | 0.28<br>(0.25-0.31) | 0.00<br>(0.00-0.00)                                                            | 0.00<br>(0.00-0.00) | 0.00<br>(0.00-0.00) | 830.32<br>(674.38-1,016.20)                                                                   | 831.66<br>(665.70-1,028.00) | 837.58<br>(672.62-1,034.63) |
| Spain          | 0.43<br>(0.26-0.74)                                                                 | 0.08<br>(0.06-0.13) | 0.05<br>(0.03-0.10) | 0.50<br>(0.44-0.56)                                                                        | 0.25<br>(0.22-0.28) | 0.13<br>(0.11-0.15) | 0.00<br>(0.00-0.00)                                                            | 0.00<br>(0.00-0.00) | 0.00<br>(0.00-0.00) | 704.25<br>(628.02-792.24)                                                                     | 701.22<br>(626.86-791.70)   | 717.10<br>(635.91-803.25)   |
| Sweden         | 0.05<br>(0.03-0.07)                                                                 | 0.02<br>(0.01-0.03) | 0.01<br>(0.00-0.02) | 0.14<br>(0.12-0.17)                                                                        | 0.10<br>(0.08-0.13) | 0.10<br>(0.07-0.13) | 0.00<br>(0.00-0.00)                                                            | 0.00<br>(0.00-0.00) | 0.00<br>(0.00-0.00) | 739.34<br>(665.53-829.66)                                                                     | 736.51<br>(661.30-828.13)   | 747.89<br>(667.08-836.77)   |
| Switzerland    | 0.15<br>(0.07-0.26)                                                                 | 0.03<br>(0.01-0.05) | 0.03<br>(0.01-0.05) | 0.17<br>(0.14-0.20)                                                                        | 0.10<br>(0.09-0.12) | 0.09<br>(0.07-0.11) | 0.00<br>(0.00-0.00)                                                            | 0.00<br>(0.00-0.00) | 0.00<br>(0.00-0.00) | 802.93<br>(722.23-900.23)                                                                     | 801.33<br>(718.87-900.78)   | 810.29<br>(721.44-907.69)   |
| United Kingdom | 0.03<br>(0.03-0.04)                                                                 | 0.05<br>(0.04-0.06) | 0.04<br>(0.03-0.05) | 0.16<br>(0.13-0.20)                                                                        | 0.11<br>(0.09-0.12) | 0.16<br>(0.12-0.20) | 0.00<br>(0.00-0.00)                                                            | 0.00<br>(0.00-0.00) | 0.00<br>(0.00-0.00) | 737.44<br>(665.14-828.98)                                                                     | 733.05<br>(657.98-825.40)   | 752.04<br>(671.77-842.58)   |

**Appendix Table 1b. Unscaled values for each SDG health-related indicator by country for 1990, 2000, and 2015**

| Location  | Indicator 3.3.1: Age-standardised rate of new HIV infections (per 1,000 population) |                     |                     | Indicator 3.3.2: Age-standardised rate of new and relapsed TB cases (per 1,000 population) |                     |                     | Indicator 3.3.3: Age-standardised rate of malaria cases (per 1,000 population) |                     |                     | Indicator 3.3.4: Age-standardised rate of hepatitis B incident cases (per 100,000 population) |                                 |                                 |
|-----------|-------------------------------------------------------------------------------------|---------------------|---------------------|--------------------------------------------------------------------------------------------|---------------------|---------------------|--------------------------------------------------------------------------------|---------------------|---------------------|-----------------------------------------------------------------------------------------------|---------------------------------|---------------------------------|
|           | 1990                                                                                | 2000                | 2015                | 1990                                                                                       | 2000                | 2015                | 1990                                                                           | 2000                | 2015                | 1990                                                                                          | 2000                            | 2015                            |
| Argentina | 0.34<br>(0.30-0.38)                                                                 | 0.40<br>(0.36-0.43) | 0.32<br>(0.24-0.39) | 0.73<br>(0.67-0.80)                                                                        | 0.68<br>(0.62-0.73) | 0.41<br>(0.37-0.45) | 0.05<br>(0.05-0.05)                                                            | 0.01<br>(0.01-0.01) | 0.00<br>(0.00-0.00) | 1,027.38<br>(921.98-1,155.99)                                                                 | 1,026.71<br>(926.32-1,154.53)   | 1,034.10<br>(918.08-1,159.42)   |
| Chile     | 0.17<br>(0.12-0.33)                                                                 | 0.21<br>(0.18-0.27) | 0.12<br>(0.11-0.15) | 0.66<br>(0.60-0.71)                                                                        | 0.48<br>(0.45-0.52) | 0.34<br>(0.30-0.37) | 0.00<br>(0.00-0.00)                                                            | 0.00<br>(0.00-0.00) | 0.00<br>(0.00-0.00) | 1,028.88<br>(924.55-1,153.98)                                                                 | 1,028.09<br>(922.16-1,152.81)   | 1,034.14<br>(923.45-1,155.90)   |
| Uruguay   | 0.12<br>(0.05-0.38)                                                                 | 0.20<br>(0.13-0.33) | 0.14<br>(0.09-0.22) | 0.41<br>(0.37-0.45)                                                                        | 0.31<br>(0.28-0.34) | 0.23<br>(0.21-0.26) | 0.00<br>(0.00-0.00)                                                            | 0.00<br>(0.00-0.00) | 0.00<br>(0.00-0.00) | 1,028.24<br>(923.77-1,153.15)                                                                 | 1,027.58<br>(921.72-1,150.13)   | 1,033.15<br>(923.50-1,153.73)   |
| Belarus   | 0.03<br>(0.01-0.06)                                                                 | 0.14<br>(0.08-0.23) | 0.15<br>(0.09-0.24) | 0.48<br>(0.42-0.55)                                                                        | 0.56<br>(0.51-0.62) | 0.54<br>(0.48-0.62) | 0.00<br>(0.00-0.00)                                                            | 0.00<br>(0.00-0.00) | 0.00<br>(0.00-0.00) | 1,676.21<br>(1,478.34-1,888.68)                                                               | 1,673.59<br>(1,475.95-1,891.33) | 1,678.75<br>(1,476.48-1,892.24) |
| Estonia   | 0.01<br>(0.01-0.02)                                                                 | 0.11<br>(0.08-0.17) | 0.13<br>(0.09-0.18) | 0.73<br>(0.65-0.80)                                                                        | 0.90<br>(0.82-0.98) | 0.48<br>(0.43-0.54) | 0.00<br>(0.00-0.00)                                                            | 0.00<br>(0.00-0.00) | 0.00<br>(0.00-0.00) | 1,676.84<br>(1,477.93-1,887.56)                                                               | 1,672.82<br>(1,475.72-1,891.16) | 1,679.07<br>(1,476.63-1,893.06) |
| Latvia    | 0.08<br>(0.04-0.14)                                                                 | 0.19<br>(0.15-0.28) | 0.12<br>(0.06-0.19) | 0.88<br>(0.79-0.95)                                                                        | 1.09<br>(1.01-1.17) | 0.55<br>(0.50-0.61) | 0.00<br>(0.00-0.00)                                                            | 0.00<br>(0.00-0.00) | 0.00<br>(0.00-0.00) | 1,676.40<br>(1,476.57-1,885.39)                                                               | 1,673.05<br>(1,476.00-1,890.42) | 1,679.58<br>(1,475.93-1,895.14) |
| Lithuania | 0.03<br>(0.01-0.05)                                                                 | 0.07<br>(0.05-0.10) | 0.04<br>(0.02-0.07) | 1.13<br>(1.01-1.23)                                                                        | 1.15<br>(1.05-1.24) | 0.87<br>(0.79-0.96) | 0.00<br>(0.00-0.00)                                                            | 0.00<br>(0.00-0.00) | 0.00<br>(0.00-0.00) | 1,677.07<br>(1,477.85-1,888.05)                                                               | 1,673.32<br>(1,476.28-1,890.97) | 1,679.50<br>(1,476.84-1,893.91) |
| Moldova   | 0.07<br>(0.03-0.21)                                                                 | 0.15<br>(0.11-0.22) | 0.14<br>(0.09-0.22) | 0.66<br>(0.59-0.73)                                                                        | 0.89<br>(0.82-0.95) | 0.81<br>(0.73-0.87) | 0.00<br>(0.00-0.00)                                                            | 0.00<br>(0.00-0.00) | 0.00<br>(0.00-0.00) | 1,675.50<br>(1,475.80-1,886.27)                                                               | 1,673.08<br>(1,476.27-1,891.50) | 1,679.71<br>(1,476.92-1,892.30) |
| Russia    | 0.08<br>(0.03-0.14)                                                                 | 0.31<br>(0.22-0.46) | 0.41<br>(0.26-0.68) | 1.30<br>(1.19-1.40)                                                                        | 1.81<br>(1.62-1.98) | 1.30<br>(1.17-1.40) | 0.00<br>(0.00-0.00)                                                            | 0.00<br>(0.00-0.00) | 0.00<br>(0.00-0.00) | 1,676.44<br>(1,478.66-1,889.72)                                                               | 1,673.22<br>(1,475.76-1,890.06) | 1,677.95<br>(1,476.69-1,892.64) |
| Ukraine   | 0.13<br>(0.09-0.21)                                                                 | 0.62<br>(0.48-0.85) | 0.42<br>(0.35-0.52) | 1.05<br>(0.96-1.14)                                                                        | 1.53<br>(1.39-1.65) | 1.36<br>(1.23-1.46) | 0.00<br>(0.00-0.00)                                                            | 0.00<br>(0.00-0.00) | 0.00<br>(0.00-0.00) | 1,675.57<br>(1,476.68-1,885.45)                                                               | 1,672.86<br>(1,475.80-1,890.33) | 1,678.42<br>(1,476.72-1,893.50) |

**Appendix Table 1b. Unscaled values for each SDG health-related indicator by country for 1990, 2000, and 2015**

| Location               | Indicator 3.3.1: Age-standardised rate of new HIV infections (per 1,000 population) |                     |                     | Indicator 3.3.2: Age-standardised rate of new and relapsed TB cases (per 1,000 population) |                     |                     | Indicator 3.3.3: Age-standardised rate of malaria cases (per 1,000 population) |                     |                     | Indicator 3.3.4: Age-standardised rate of hepatitis B incident cases (per 100,000 population) |                                 |                                 |
|------------------------|-------------------------------------------------------------------------------------|---------------------|---------------------|--------------------------------------------------------------------------------------------|---------------------|---------------------|--------------------------------------------------------------------------------|---------------------|---------------------|-----------------------------------------------------------------------------------------------|---------------------------------|---------------------------------|
|                        | 1990                                                                                | 2000                | 2015                | 1990                                                                                       | 2000                | 2015                | 1990                                                                           | 2000                | 2015                | 1990                                                                                          | 2000                            | 2015                            |
| Albania                | 0.00<br>(0.00-0.01)                                                                 | 0.00<br>(0.00-0.01) | 0.00<br>(0.00-0.01) | 0.14<br>(0.12-0.17)                                                                        | 0.13<br>(0.11-0.16) | 0.15<br>(0.12-0.19) | 0.00<br>(0.00-0.00)                                                            | 0.00<br>(0.00-0.00) | 0.00<br>(0.00-0.00) | 1,223.74<br>(999.80-1,492.03)                                                                 | 1,221.82<br>(1,006.62-1,487.23) | 1,226.57<br>(1,010.44-1,495.40) |
| Bosnia and Herzegovina | 0.00<br>(0.00-0.01)                                                                 | 0.00<br>(0.00-0.01) | 0.00<br>(0.00-0.01) | 0.37<br>(0.34-0.41)                                                                        | 0.32<br>(0.28-0.36) | 0.30<br>(0.26-0.36) | 0.00<br>(0.00-0.00)                                                            | 0.00<br>(0.00-0.00) | 0.00<br>(0.00-0.00) | 1,222.00<br>(999.93-1,492.97)                                                                 | 1,222.68<br>(1,002.90-1,486.12) | 1,228.43<br>(1,011.70-1,495.26) |
| Bulgaria               | 0.01<br>(0.00-0.03)                                                                 | 0.02<br>(0.01-0.04) | 0.02<br>(0.01-0.04) | 0.32<br>(0.28-0.37)                                                                        | 0.44<br>(0.39-0.50) | 0.30<br>(0.27-0.34) | 0.00<br>(0.00-0.00)                                                            | 0.00<br>(0.00-0.00) | 0.00<br>(0.00-0.00) | 1,300.47<br>(1,173.13-1,462.24)                                                               | 1,297.19<br>(1,162.33-1,451.99) | 1,301.60<br>(1,156.28-1,465.13) |
| Croatia                | 0.01<br>(0.01-0.02)                                                                 | 0.01<br>(0.01-0.02) | 0.01<br>(0.00-0.01) | 0.75<br>(0.68-0.82)                                                                        | 0.48<br>(0.44-0.53) | 0.21<br>(0.18-0.24) | 0.00<br>(0.00-0.00)                                                            | 0.00<br>(0.00-0.00) | 0.00<br>(0.00-0.00) | 1,228.72<br>(1,100.87-1,386.50)                                                               | 1,230.02<br>(1,102.54-1,376.16) | 1,234.77<br>(1,094.98-1,391.76) |
| Czech Republic         | 0.01<br>(0.01-0.01)                                                                 | 0.01<br>(0.01-0.01) | 0.01<br>(0.00-0.01) | 0.22<br>(0.19-0.25)                                                                        | 0.15<br>(0.13-0.17) | 0.11<br>(0.09-0.13) | 0.00<br>(0.00-0.00)                                                            | 0.00<br>(0.00-0.00) | 0.00<br>(0.00-0.00) | 1,220.94<br>(999.08-1,494.67)                                                                 | 1,221.68<br>(1,002.12-1,484.10) | 1,228.13<br>(1,011.13-1,494.71) |
| Hungary                | 0.03<br>(0.03-0.03)                                                                 | 0.02<br>(0.02-0.02) | 0.01<br>(0.01-0.01) | 0.49<br>(0.44-0.53)                                                                        | 0.30<br>(0.27-0.33) | 0.15<br>(0.13-0.18) | 0.00<br>(0.00-0.00)                                                            | 0.00<br>(0.00-0.00) | 0.00<br>(0.00-0.00) | 1,220.34<br>(998.88-1,491.46)                                                                 | 1,220.60<br>(1,000.80-1,484.19) | 1,226.70<br>(1,009.63-1,492.97) |
| Macedonia              | 0.00<br>(0.00-0.00)                                                                 | 0.00<br>(0.00-0.01) | 0.00<br>(0.00-0.01) | 0.50<br>(0.45-0.55)                                                                        | 0.36<br>(0.33-0.39) | 0.23<br>(0.20-0.27) | 0.00<br>(0.00-0.00)                                                            | 0.00<br>(0.00-0.00) | 0.00<br>(0.00-0.00) | 1,222.38<br>(999.70-1,489.39)                                                                 | 1,222.44<br>(1,002.82-1,487.61) | 1,227.87<br>(1,011.50-1,494.84) |
| Montenegro             | 0.00<br>(0.00-0.01)                                                                 | 0.01<br>(0.00-0.01) | 0.01<br>(0.00-0.01) | 0.16<br>(0.13-0.19)                                                                        | 0.14<br>(0.11-0.17) | 0.16<br>(0.13-0.20) | 0.00<br>(0.00-0.00)                                                            | 0.00<br>(0.00-0.00) | 0.00<br>(0.00-0.00) | 1,221.83<br>(999.68-1,493.88)                                                                 | 1,221.50<br>(1,001.93-1,484.70) | 1,227.56<br>(1,010.94-1,493.73) |
| Poland                 | 0.02<br>(0.01-0.02)                                                                 | 0.02<br>(0.01-0.02) | 0.01<br>(0.01-0.02) | 0.61<br>(0.56-0.67)                                                                        | 0.36<br>(0.33-0.39) | 0.24<br>(0.21-0.26) | 0.00<br>(0.00-0.00)                                                            | 0.00<br>(0.00-0.00) | 0.00<br>(0.00-0.00) | 923.37<br>(830.61-1,036.93)                                                                   | 918.72<br>(825.62-1,025.93)     | 932.00<br>(830.62-1,044.49)     |
| Romania                | 0.02<br>(0.02-0.03)                                                                 | 0.04<br>(0.04-0.05) | 0.04<br>(0.02-0.05) | 1.09<br>(1.00-1.17)                                                                        | 1.53<br>(1.41-1.64) | 0.93<br>(0.85-1.01) | 0.00<br>(0.00-0.00)                                                            | 0.00<br>(0.00-0.00) | 0.00<br>(0.00-0.00) | 1,221.45<br>(998.90-1,492.33)                                                                 | 1,221.72<br>(1,001.61-1,484.30) | 1,227.37<br>(1,010.63-1,494.35) |

**Appendix Table 1b. Unscaled values for each SDG health-related indicator by country for 1990, 2000, and 2015**

| Location   | Indicator 3.3.1: Age-standardised rate of new HIV infections (per 1,000 population) |                     |                     | Indicator 3.3.2: Age-standardised rate of new and relapsed TB cases (per 1,000 population) |                     |                     | Indicator 3.3.3: Age-standardised rate of malaria cases (per 1,000 population) |                     |                     | Indicator 3.3.4: Age-standardised rate of hepatitis B incident cases (per 100,000 population) |                                 |                                 |
|------------|-------------------------------------------------------------------------------------|---------------------|---------------------|--------------------------------------------------------------------------------------------|---------------------|---------------------|--------------------------------------------------------------------------------|---------------------|---------------------|-----------------------------------------------------------------------------------------------|---------------------------------|---------------------------------|
|            | 1990                                                                                | 2000                | 2015                | 1990                                                                                       | 2000                | 2015                | 1990                                                                           | 2000                | 2015                | 1990                                                                                          | 2000                            | 2015                            |
| Serbia     | 0.02<br>(0.01-0.02)                                                                 | 0.02<br>(0.01-0.06) | 0.02<br>(0.02-0.03) | 0.27<br>(0.24-0.31)                                                                        | 0.22<br>(0.19-0.26) | 0.21<br>(0.18-0.24) | 0.00<br>(0.00-0.00)                                                            | 0.00<br>(0.00-0.00) | 0.00<br>(0.00-0.00) | 1,221.38<br>(999.16-1,492.64)                                                                 | 1,221.51<br>(1,002.36-1,484.50) | 1,227.34<br>(1,011.11-1,493.78) |
| Slovakia   | 0.00<br>(0.00-0.01)                                                                 | 0.00<br>(0.00-0.00) | 0.00<br>(0.00-0.00) | 0.20<br>(0.17-0.24)                                                                        | 0.16<br>(0.13-0.19) | 0.14<br>(0.11-0.17) | 0.00<br>(0.00-0.00)                                                            | 0.00<br>(0.00-0.00) | 0.00<br>(0.00-0.00) | 1,220.56<br>(998.82-1,492.37)                                                                 | 1,220.92<br>(1,001.17-1,483.61) | 1,227.05<br>(1,009.54-1,493.82) |
| Slovenia   | 0.01<br>(0.00-0.02)                                                                 | 0.01<br>(0.00-0.01) | 0.00<br>(0.00-0.01) | 0.36<br>(0.32-0.40)                                                                        | 0.21<br>(0.18-0.23) | 0.15<br>(0.12-0.18) | 0.00<br>(0.00-0.00)                                                            | 0.00<br>(0.00-0.00) | 0.00<br>(0.00-0.00) | 1,220.63<br>(998.78-1,495.38)                                                                 | 1,222.01<br>(1,002.90-1,484.16) | 1,228.81<br>(1,011.36-1,496.02) |
| Armenia    | 0.00<br>(0.00-0.01)                                                                 | 0.02<br>(0.01-0.03) | 0.04<br>(0.02-0.05) | 0.29<br>(0.26-0.34)                                                                        | 0.32<br>(0.28-0.36) | 0.37<br>(0.32-0.44) | 2.22<br>(0.17-4.21)                                                            | 0.00<br>(0.00-0.00) | 0.00<br>(0.00-0.00) | 1,875.37<br>(1,614.58-2,170.48)                                                               | 1,873.12<br>(1,617.96-2,169.98) | 1,882.49<br>(1,615.81-2,148.34) |
| Azerbaijan | 0.02<br>(0.01-0.06)                                                                 | 0.05<br>(0.03-0.09) | 0.04<br>(0.03-0.06) | 1.39<br>(1.23-1.59)                                                                        | 1.42<br>(1.27-1.63) | 1.04<br>(0.90-1.20) | 1.01<br>(0.12-1.87)                                                            | 0.17<br>(0.17-0.17) | 0.00<br>(0.00-0.00) | 1,875.28<br>(1,614.72-2,168.83)                                                               | 1,875.17<br>(1,617.11-2,170.63) | 1,886.47<br>(1,619.72-2,145.28) |
| Georgia    | 0.01<br>(0.00-0.02)                                                                 | 0.02<br>(0.01-0.02) | 0.05<br>(0.03-0.07) | 0.77<br>(0.68-0.90)                                                                        | 0.54<br>(0.48-0.61) | 0.56<br>(0.49-0.65) | 1.73<br>(0.19-3.38)                                                            | 0.06<br>(0.05-0.06) | 0.00<br>(0.00-0.00) | 1,875.24<br>(1,614.00-2,172.10)                                                               | 1,875.31<br>(1,617.24-2,173.86) | 1,885.99<br>(1,618.82-2,146.86) |
| Kazakhstan | 0.05<br>(0.03-0.09)                                                                 | 0.13<br>(0.09-0.19) | 0.11<br>(0.07-0.16) | 2.58<br>(2.30-2.79)                                                                        | 2.66<br>(2.46-2.89) | 1.79<br>(1.63-1.95) | 0.00<br>(0.00-0.00)                                                            | 0.00<br>(0.00-0.00) | 0.00<br>(0.00-0.00) | 1,875.79<br>(1,613.69-2,169.44)                                                               | 1,875.29<br>(1,616.52-2,175.75) | 1,884.89<br>(1,616.42-2,145.08) |
| Kyrgyzstan | 0.04<br>(0.02-0.08)                                                                 | 0.10<br>(0.06-0.18) | 0.07<br>(0.05-0.12) | 0.91<br>(0.80-1.05)                                                                        | 1.10<br>(0.99-1.23) | 0.77<br>(0.68-0.86) | 1.75<br>(0.21-3.31)                                                            | 0.00<br>(0.00-0.00) | 0.00<br>(0.00-0.00) | 1,876.06<br>(1,614.78-2,170.46)                                                               | 1,876.63<br>(1,618.35-2,177.25) | 1,885.89<br>(1,619.02-2,146.28) |
| Mongolia   | 0.01<br>(0.00-0.02)                                                                 | 0.01<br>(0.00-0.01) | 0.00<br>(0.00-0.01) | 1.75<br>(1.56-2.00)                                                                        | 1.57<br>(1.41-1.79) | 1.36<br>(1.20-1.54) | 0.00<br>(0.00-0.00)                                                            | 0.00<br>(0.00-0.00) | 0.00<br>(0.00-0.00) | 1,881.10<br>(1,677.43-2,127.00)                                                               | 1,881.37<br>(1,681.07-2,114.19) | 1,880.81<br>(1,656.38-2,128.31) |
| Tajikistan | 0.02<br>(0.00-0.06)                                                                 | 0.09<br>(0.06-0.15) | 0.05<br>(0.03-0.08) | 0.78<br>(0.69-0.90)                                                                        | 0.81<br>(0.73-0.92) | 0.62<br>(0.54-0.71) | 1.81<br>(0.53-3.08)                                                            | 2.33<br>(2.18-2.50) | 0.00<br>(0.00-0.00) | 1,876.88<br>(1,614.89-2,170.39)                                                               | 1,877.46<br>(1,619.79-2,178.98) | 1,887.27<br>(1,620.57-2,147.54) |

**Appendix Table 1b. Unscaled values for each SDG health-related indicator by country for 1990, 2000, and 2015**

| Location     | Indicator 3.3.1: Age-standardised rate of new HIV infections (per 1,000 population) |                     |                     | Indicator 3.3.2: Age-standardised rate of new and relapsed TB cases (per 1,000 population) |                     |                     | Indicator 3.3.3: Age-standardised rate of malaria cases (per 1,000 population) |                     |                     | Indicator 3.3.4: Age-standardised rate of hepatitis B incident cases (per 100,000 population) |                                 |                                 |
|--------------|-------------------------------------------------------------------------------------|---------------------|---------------------|--------------------------------------------------------------------------------------------|---------------------|---------------------|--------------------------------------------------------------------------------|---------------------|---------------------|-----------------------------------------------------------------------------------------------|---------------------------------|---------------------------------|
|              | 1990                                                                                | 2000                | 2015                | 1990                                                                                       | 2000                | 2015                | 1990                                                                           | 2000                | 2015                | 1990                                                                                          | 2000                            | 2015                            |
| Turkmenistan | 0.01<br>(0.01-0.01)                                                                 | 0.25<br>(0.14-0.42) | 0.23<br>(0.11-0.43) | 1.20<br>(1.05-1.35)                                                                        | 1.36<br>(1.22-1.56) | 0.96<br>(0.85-1.10) | 0.15<br>(0.03-0.26)                                                            | 0.00<br>(0.00-0.00) | 0.00<br>(0.00-0.00) | 1,876.12<br>(1,614.39-2,170.73)                                                               | 1,876.48<br>(1,618.55-2,178.04) | 1,885.45<br>(1,617.67-2,144.91) |
| Uzbekistan   | 0.03<br>(0.01-0.09)                                                                 | 0.09<br>(0.05-0.15) | 0.02<br>(0.01-0.03) | 0.79<br>(0.70-0.89)                                                                        | 0.96<br>(0.86-1.09) | 0.72<br>(0.63-0.82) | 0.33<br>(0.03-0.63)                                                            | 0.00<br>(0.00-0.00) | 0.00<br>(0.00-0.00) | 1,829.51<br>(1,636.21-2,059.68)                                                               | 1,826.68<br>(1,631.52-2,050.12) | 1,827.64<br>(1,614.70-2,048.61) |
| Colombia     | 0.11<br>(0.07-0.18)                                                                 | 0.14<br>(0.12-0.19) | 0.15<br>(0.10-0.23) | 0.62<br>(0.58-0.66)                                                                        | 0.54<br>(0.51-0.57) | 0.31<br>(0.28-0.34) | 2.67<br>(1.61-3.68)                                                            | 2.09<br>(1.57-2.59) | 1.94<br>(1.60-2.26) | 1,109.79<br>(991.30-1,251.71)                                                                 | 1,110.08<br>(991.20-1,241.65)   | 1,134.61<br>(1,002.93-1,276.62) |
| Costa Rica   | 0.09<br>(0.07-0.13)                                                                 | 0.12<br>(0.09-0.17) | 0.08<br>(0.06-0.11) | 0.37<br>(0.34-0.40)                                                                        | 0.30<br>(0.28-0.33) | 0.17<br>(0.15-0.19) | 0.31<br>(0.30-0.33)                                                            | 0.43<br>(0.43-0.44) | 0.00<br>(0.00-0.00) | 1,080.64<br>(827.96-1,372.48)                                                                 | 1,069.52<br>(810.30-1,344.42)   | 1,070.96<br>(828.48-1,366.78)   |
| El Salvador  | 0.15<br>(0.10-0.22)                                                                 | 0.29<br>(0.21-0.42) | 0.15<br>(0.10-0.22) | 0.44<br>(0.40-0.48)                                                                        | 0.26<br>(0.24-0.28) | 0.22<br>(0.19-0.25) | 1.38<br>(1.29-1.48)                                                            | 0.11<br>(0.10-0.11) | 0.00<br>(0.00-0.00) | 1,077.97<br>(827.25-1,370.43)                                                                 | 1,066.43<br>(804.69-1,340.46)   | 1,066.43<br>(821.33-1,359.62)   |
| Guatemala    | 0.31<br>(0.27-0.40)                                                                 | 0.38<br>(0.26-0.56) | 0.16<br>(0.11-0.24) | 2.17<br>(2.02-2.31)                                                                        | 0.90<br>(0.85-0.96) | 0.39<br>(0.34-0.43) | 5.03<br>(2.02-8.08)                                                            | 2.04<br>(1.37-2.65) | 1.47<br>(1.21-1.72) | 1,079.18<br>(827.85-1,371.22)                                                                 | 1,067.14<br>(805.73-1,340.52)   | 1,068.35<br>(824.27-1,365.15)   |
| Honduras     | 0.26<br>(0.22-0.33)                                                                 | 0.25<br>(0.19-0.30) | 0.22<br>(0.15-0.32) | 0.75<br>(0.69-0.81)                                                                        | 0.71<br>(0.66-0.76) | 0.51<br>(0.46-0.56) | 1.15<br>(0.68-1.59)                                                            | 0.90<br>(0.66-1.13) | 0.92<br>(0.75-1.08) | 1,080.24<br>(827.57-1,373.51)                                                                 | 1,069.22<br>(809.48-1,343.06)   | 1,070.53<br>(827.70-1,366.23)   |
| Mexico       | 0.14<br>(0.13-0.16)                                                                 | 0.14<br>(0.13-0.15) | 0.12<br>(0.11-0.13) | 0.64<br>(0.57-0.69)                                                                        | 0.47<br>(0.42-0.52) | 0.27<br>(0.25-0.29) | 2.81<br>(2.34-3.29)                                                            | 0.06<br>(0.06-0.06) | 0.02<br>(0.02-0.02) | 388.07<br>(350.44-434.28)                                                                     | 386.30<br>(348.49-430.43)       | 444.51<br>(396.80-500.27)       |
| Nicaragua    | 0.03<br>(0.02-0.03)                                                                 | 0.07<br>(0.05-0.10) | 0.16<br>(0.09-0.27) | 0.63<br>(0.58-0.68)                                                                        | 0.41<br>(0.38-0.44) | 0.27<br>(0.24-0.30) | 3.39<br>(1.48-5.34)                                                            | 1.47<br>(1.04-1.87) | 1.08<br>(0.89-1.26) | 1,027.65<br>(922.12-1,152.71)                                                                 | 1,027.68<br>(917.87-1,149.29)   | 1,027.77<br>(912.03-1,155.68)   |
| Panama       | 0.16<br>(0.10-0.27)                                                                 | 0.51<br>(0.39-0.71) | 0.54<br>(0.33-0.88) | 0.85<br>(0.78-0.92)                                                                        | 0.70<br>(0.64-0.76) | 0.63<br>(0.58-0.69) | 0.13<br>(0.12-0.13)                                                            | 0.29<br>(0.28-0.30) | 0.20<br>(0.20-0.21) | 1,080.86<br>(828.01-1,372.16)                                                                 | 1,069.81<br>(810.94-1,344.24)   | 1,070.99<br>(829.15-1,366.80)   |

**Appendix Table 1b. Unscaled values for each SDG health-related indicator by country for 1990, 2000, and 2015**

| Location            | Indicator 3.3.1: Age-standardised rate of new HIV infections (per 1,000 population) |                     |                     | Indicator 3.3.2: Age-standardised rate of new and relapsed TB cases (per 1,000 population) |                     |                     | Indicator 3.3.3: Age-standardised rate of malaria cases (per 1,000 population) |                     |                     | Indicator 3.3.4: Age-standardised rate of hepatitis B incident cases (per 100,000 population) |                                 |                                 |
|---------------------|-------------------------------------------------------------------------------------|---------------------|---------------------|--------------------------------------------------------------------------------------------|---------------------|---------------------|--------------------------------------------------------------------------------|---------------------|---------------------|-----------------------------------------------------------------------------------------------|---------------------------------|---------------------------------|
|                     | 1990                                                                                | 2000                | 2015                | 1990                                                                                       | 2000                | 2015                | 1990                                                                           | 2000                | 2015                | 1990                                                                                          | 2000                            | 2015                            |
| Venezuela           | 0.12<br>(0.06-0.25)                                                                 | 0.18<br>(0.15-0.25) | 0.15<br>(0.09-0.24) | 0.79<br>(0.73-0.83)                                                                        | 0.53<br>(0.49-0.56) | 0.33<br>(0.31-0.36) | 0.82<br>(0.53-1.09)                                                            | 0.79<br>(0.57-0.99) | 0.72<br>(0.59-0.84) | 1,080.42<br>(828.38-1,372.64)                                                                 | 1,069.32<br>(809.78-1,344.00)   | 1,070.34<br>(827.54-1,365.64)   |
| Bolivia             | 0.03<br>(0.02-0.04)                                                                 | 0.05<br>(0.05-0.07) | 0.05<br>(0.04-0.06) | 1.63<br>(1.50-1.78)                                                                        | 1.07<br>(0.99-1.14) | 0.73<br>(0.66-0.80) | 0.19<br>(0.13-0.24)                                                            | 0.18<br>(0.14-0.21) | 0.19<br>(0.15-0.22) | 1,141.46<br>(1,019.29-1,288.50)                                                               | 1,138.62<br>(1,012.20-1,283.11) | 1,141.95<br>(1,006.88-1,288.36) |
| Ecuador             | 0.14<br>(0.10-0.23)                                                                 | 0.25<br>(0.22-0.32) | 0.24<br>(0.18-0.31) | 1.85<br>(1.70-2.03)                                                                        | 1.15<br>(1.07-1.24) | 0.66<br>(0.61-0.73) | 5.55<br>(5.25-5.90)                                                            | 6.92<br>(6.68-7.19) | 0.03<br>(0.03-0.03) | 1,141.51<br>(1,019.42-1,287.98)                                                               | 1,138.61<br>(1,012.19-1,282.37) | 1,141.91<br>(1,006.96-1,288.74) |
| Peru                | 0.21<br>(0.19-0.23)                                                                 | 0.17<br>(0.15-0.21) | 0.10<br>(0.08-0.13) | 3.45<br>(3.20-3.73)                                                                        | 1.60<br>(1.47-1.73) | 0.88<br>(0.77-1.02) | 0.61<br>(0.37-0.84)                                                            | 0.52<br>(0.40-0.65) | 0.54<br>(0.44-0.63) | 1,140.25<br>(1,018.23-1,287.14)                                                               | 1,137.93<br>(1,011.57-1,282.58) | 1,142.08<br>(1,006.83-1,289.52) |
| Antigua and Barbuda | 0.27<br>(0.09-0.58)                                                                 | 0.36<br>(0.21-0.69) | 0.24<br>(0.11-0.50) | 0.33<br>(0.29-0.38)                                                                        | 0.35<br>(0.31-0.40) | 0.32<br>(0.26-0.39) | 0.00<br>(0.00-0.00)                                                            | 0.00<br>(0.00-0.00) | 0.00<br>(0.00-0.00) | 974.56<br>(877.34-1,085.56)                                                                   | 971.18<br>(872.92-1,083.29)     | 975.82<br>(871.20-1,091.93)     |
| The Bahamas         | 1.04<br>(0.74-1.61)                                                                 | 0.78<br>(0.67-0.92) | 0.30<br>(0.21-0.47) | 0.62<br>(0.56-0.69)                                                                        | 0.53<br>(0.48-0.58) | 0.32<br>(0.28-0.37) | 0.00<br>(0.00-0.00)                                                            | 0.00<br>(0.00-0.00) | 0.00<br>(0.00-0.00) | 975.32<br>(878.22-1,086.34)                                                                   | 973.16<br>(874.15-1,082.65)     | 977.47<br>(873.40-1,094.08)     |
| Barbados            | 0.32<br>(0.20-0.53)                                                                 | 0.30<br>(0.22-0.41) | 0.24<br>(0.14-0.38) | 0.25<br>(0.21-0.28)                                                                        | 0.26<br>(0.23-0.29) | 0.25<br>(0.20-0.30) | 0.00<br>(0.00-0.00)                                                            | 0.00<br>(0.00-0.00) | 0.00<br>(0.00-0.00) | 974.35<br>(877.13-1,083.06)                                                                   | 973.27<br>(873.68-1,083.09)     | 976.84<br>(872.84-1,093.95)     |
| Belize              | 0.18<br>(0.06-0.45)                                                                 | 1.57<br>(0.96-2.61) | 0.66<br>(0.46-0.90) | 0.59<br>(0.54-0.65)                                                                        | 0.86<br>(0.80-0.94) | 0.63<br>(0.57-0.70) | 11.93<br>(10.98-13.12)                                                         | 4.68<br>(4.41-4.98) | 0.09<br>(0.09-0.09) | 977.00<br>(879.55-1,088.89)                                                                   | 975.22<br>(874.72-1,085.63)     | 978.18<br>(872.65-1,093.73)     |
| Cuba                | 0.03<br>(0.01-0.04)                                                                 | 0.06<br>(0.03-0.09) | 0.11<br>(0.07-0.16) | 0.15<br>(0.12-0.18)                                                                        | 0.13<br>(0.11-0.16) | 0.12<br>(0.10-0.14) | 0.00<br>(0.00-0.00)                                                            | 0.00<br>(0.00-0.00) | 0.00<br>(0.00-0.00) | 977.00<br>(879.89-1,089.62)                                                                   | 975.37<br>(875.33-1,085.25)     | 979.47<br>(874.87-1,094.51)     |
| Dominica            | 0.18<br>(0.06-0.37)                                                                 | 0.27<br>(0.17-0.52) | 0.21<br>(0.10-0.42) | 0.48<br>(0.43-0.53)                                                                        | 0.47<br>(0.43-0.51) | 0.41<br>(0.37-0.47) | 0.00<br>(0.00-0.00)                                                            | 0.00<br>(0.00-0.00) | 0.00<br>(0.00-0.00) | 976.02<br>(878.34-1,085.75)                                                                   | 974.44<br>(874.76-1,084.37)     | 978.12<br>(873.73-1,093.87)     |

**Appendix Table 1b. Unscaled values for each SDG health-related indicator by country for 1990, 2000, and 2015**

| Location                         | Indicator 3.3.1: Age-standardised rate of new HIV infections (per 1,000 population) |                     |                     | Indicator 3.3.2: Age-standardised rate of new and relapsed TB cases (per 1,000 population) |                     |                     | Indicator 3.3.3: Age-standardised rate of malaria cases (per 1,000 population) |                       |                       | Indicator 3.3.4: Age-standardised rate of hepatitis B incident cases (per 100,000 population) |                                 |                                 |
|----------------------------------|-------------------------------------------------------------------------------------|---------------------|---------------------|--------------------------------------------------------------------------------------------|---------------------|---------------------|--------------------------------------------------------------------------------|-----------------------|-----------------------|-----------------------------------------------------------------------------------------------|---------------------------------|---------------------------------|
|                                  | 1990                                                                                | 2000                | 2015                | 1990                                                                                       | 2000                | 2015                | 1990                                                                           | 2000                  | 2015                  | 1990                                                                                          | 2000                            | 2015                            |
| Dominican Republic               | 0.78<br>(0.60-0.94)                                                                 | 1.11<br>(0.87-1.39) | 0.38<br>(0.30-0.48) | 1.32<br>(1.21-1.47)                                                                        | 1.08<br>(0.98-1.18) | 0.73<br>(0.66-0.82) | 1.42<br>(1.18-1.67)                                                            | 1.25<br>(1.02-1.47)   | 1.23<br>(1.00-1.44)   | 976.86<br>(879.05-1,087.52)                                                                   | 974.85<br>(875.03-1,084.52)     | 978.13<br>(873.23-1,093.62)     |
| Grenada                          | 0.18<br>(0.06-0.38)                                                                 | 0.30<br>(0.18-0.63) | 0.22<br>(0.10-0.46) | 0.21<br>(0.19-0.24)                                                                        | 0.23<br>(0.20-0.26) | 0.24<br>(0.20-0.29) | 0.00<br>(0.00-0.00)                                                            | 0.00<br>(0.00-0.00)   | 0.00<br>(0.00-0.00)   | 975.40<br>(878.66-1,086.01)                                                                   | 974.33<br>(872.04-1,083.33)     | 978.79<br>(873.54-1,097.15)     |
| Guyana                           | 0.55<br>(0.23-1.11)                                                                 | 2.95<br>(1.71-4.66) | 1.83<br>(1.17-2.72) | 0.83<br>(0.76-0.91)                                                                        | 1.23<br>(1.14-1.33) | 1.15<br>(1.06-1.26) | 15.94<br>(9.15-22.52)                                                          | 17.38<br>(9.80-24.77) | 11.54<br>(8.96-14.01) | 975.34<br>(877.41-1,085.86)                                                                   | 974.75<br>(874.05-1,082.41)     | 979.20<br>(873.67-1,096.01)     |
| Haiti                            | 3.69<br>(2.96-4.61)                                                                 | 1.77<br>(1.24-2.32) | 1.01<br>(0.62-1.53) | 1.29<br>(1.19-1.40)                                                                        | 1.02<br>(0.95-1.10) | 0.69<br>(0.63-0.75) | 11.94<br>(6.94-16.75)                                                          | 9.41<br>(6.04-12.53)  | 6.80<br>(5.26-8.30)   | 974.77<br>(876.82-1,084.78)                                                                   | 973.33<br>(875.58-1,084.38)     | 977.26<br>(873.04-1,093.20)     |
| Jamaica                          | 0.39<br>(0.19-0.81)                                                                 | 0.41<br>(0.33-0.53) | 0.25<br>(0.17-0.36) | 0.14<br>(0.12-0.16)                                                                        | 0.13<br>(0.12-0.15) | 0.11<br>(0.09-0.13) | 0.00<br>(0.00-0.00)                                                            | 0.00<br>(0.00-0.00)   | 0.00<br>(0.00-0.00)   | 975.05<br>(878.27-1,094.71)                                                                   | 975.17<br>(873.06-1,093.73)     | 984.08<br>(877.49-1,102.99)     |
| Saint Lucia                      | 0.17<br>(0.08-0.30)                                                                 | 0.29<br>(0.20-0.52) | 0.16<br>(0.09-0.31) | 0.73<br>(0.68-0.78)                                                                        | 0.80<br>(0.74-0.85) | 0.46<br>(0.42-0.51) | 0.00<br>(0.00-0.00)                                                            | 0.00<br>(0.00-0.00)   | 0.00<br>(0.00-0.00)   | 975.35<br>(876.66-1,084.90)                                                                   | 973.63<br>(874.79-1,085.21)     | 977.50<br>(873.43-1,093.91)     |
| Saint Vincent and the Grenadines | 0.43<br>(0.12-0.87)                                                                 | 0.75<br>(0.46-1.50) | 0.50<br>(0.23-1.03) | 0.52<br>(0.48-0.56)                                                                        | 0.65<br>(0.61-0.70) | 0.49<br>(0.44-0.54) | 0.00<br>(0.00-0.00)                                                            | 0.00<br>(0.00-0.00)   | 0.00<br>(0.00-0.00)   | 975.93<br>(879.03-1,087.83)                                                                   | 975.51<br>(876.85-1,085.88)     | 979.17<br>(875.05-1,095.32)     |
| Suriname                         | 0.40<br>(0.16-0.90)                                                                 | 0.85<br>(0.62-1.19) | 0.44<br>(0.30-0.68) | 0.37<br>(0.33-0.41)                                                                        | 0.42<br>(0.38-0.47) | 0.34<br>(0.30-0.39) | 4.84<br>(1.78-7.93)                                                            | 6.14<br>(1.96-10.38)  | 1.66<br>(0.85-2.46)   | 977.06<br>(880.20-1,089.99)                                                                   | 975.30<br>(873.97-1,085.46)     | 978.53<br>(874.56-1,094.13)     |
| Trinidad and Tobago              | 0.53<br>(0.34-0.90)                                                                 | 0.70<br>(0.51-0.99) | 0.28<br>(0.20-0.41) | 0.50<br>(0.45-0.54)                                                                        | 0.50<br>(0.45-0.54) | 0.33<br>(0.29-0.37) | 0.00<br>(0.00-0.00)                                                            | 0.00<br>(0.00-0.00)   | 0.00<br>(0.00-0.00)   | 975.95<br>(878.70-1,087.23)                                                                   | 974.52<br>(875.20-1,085.13)     | 978.00<br>(874.14-1,093.89)     |
| Brazil                           | 0.27<br>(0.23-0.33)                                                                 | 0.26<br>(0.23-0.30) | 0.23<br>(0.21-0.25) | 0.56<br>(0.49-0.66)                                                                        | 0.50<br>(0.44-0.59) | 0.42<br>(0.37-0.47) | 1.86<br>(0.86-2.86)                                                            | 0.97<br>(0.73-1.20)   | 0.99<br>(0.82-1.16)   | 1,315.67<br>(1,179.24-1,477.42)                                                               | 1,319.33<br>(1,181.72-1,475.38) | 1,343.91<br>(1,192.25-1,500.14) |

**Appendix Table 1b. Unscaled values for each SDG health-related indicator by country for 1990, 2000, and 2015**

| Location    | Indicator 3.3.1: Age-standardised rate of new HIV infections (per 1,000 population) |                     |                     | Indicator 3.3.2: Age-standardised rate of new and relapsed TB cases (per 1,000 population) |                     |                     | Indicator 3.3.3: Age-standardised rate of malaria cases (per 1,000 population) |                        |                       | Indicator 3.3.4: Age-standardised rate of hepatitis B incident cases (per 100,000 population) |                                 |                                 |
|-------------|-------------------------------------------------------------------------------------|---------------------|---------------------|--------------------------------------------------------------------------------------------|---------------------|---------------------|--------------------------------------------------------------------------------|------------------------|-----------------------|-----------------------------------------------------------------------------------------------|---------------------------------|---------------------------------|
|             | 1990                                                                                | 2000                | 2015                | 1990                                                                                       | 2000                | 2015                | 1990                                                                           | 2000                   | 2015                  | 1990                                                                                          | 2000                            | 2015                            |
| Paraguay    | 0.07<br>(0.05-0.17)                                                                 | 0.17<br>(0.13-0.23) | 0.26<br>(0.15-0.44) | 0.54<br>(0.49-0.59)                                                                        | 0.53<br>(0.48-0.57) | 0.49<br>(0.45-0.54) | 0.07<br>(0.01-0.12)                                                            | 0.05<br>(0.01-0.09)    | 0.04<br>(0.01-0.07)   | 1,325.48<br>(1,191.29-1,492.50)                                                               | 1,324.21<br>(1,189.07-1,488.23) | 1,331.76<br>(1,182.40-1,488.37) |
| China       | 0.01<br>(0.01-0.01)                                                                 | 0.05<br>(0.04-0.06) | 0.07<br>(0.06-0.08) | 1.40<br>(1.22-1.65)                                                                        | 1.22<br>(1.08-1.41) | 1.02<br>(0.92-1.16) | 0.04<br>(0.03-0.05)                                                            | 0.03<br>(0.03-0.03)    | 0.00<br>(0.00-0.00)   | 2,810.49<br>(2,508.47-3,166.62)                                                               | 2,258.17<br>(2,024.81-2,553.89) | 1,911.42<br>(1,689.91-2,148.42) |
| North Korea | 0.01<br>(0.01-0.04)                                                                 | 0.05<br>(0.03-0.14) | 0.08<br>(0.04-0.16) | 0.89<br>(0.79-1.01)                                                                        | 0.97<br>(0.87-1.08) | 0.73<br>(0.64-0.83) | 1.49<br>(1.13-1.88)                                                            | 3.93<br>(3.87-3.99)    | 0.92<br>(0.89-0.96)   | 2,542.66<br>(2,259.92-2,856.77)                                                               | 2,542.29<br>(2,257.46-2,877.74) | 2,554.13<br>(2,261.35-2,878.00) |
| Taiwan      | 0.00<br>(0.00-0.01)                                                                 | 0.02<br>(0.01-0.03) | 0.03<br>(0.02-0.04) | 0.49<br>(0.43-0.57)                                                                        | 0.44<br>(0.38-0.53) | 0.38<br>(0.32-0.45) | 0.00<br>(0.00-0.00)                                                            | 0.00<br>(0.00-0.00)    | 0.00<br>(0.00-0.00)   | 2,469.40<br>(2,194.43-2,795.32)                                                               | 2,463.26<br>(2,212.91-2,783.61) | 2,477.75<br>(2,200.88-2,799.73) |
| Cambodia    | 0.47<br>(0.25-1.22)                                                                 | 0.74<br>(0.51-1.07) | 0.64<br>(0.38-1.06) | 2.68<br>(2.49-2.89)                                                                        | 2.53<br>(2.36-2.73) | 1.66<br>(1.52-1.83) | 62.53<br>(14.83-110.40)                                                        | 55.10<br>(13.22-97.14) | 20.91<br>(5.78-36.11) | 2,019.26<br>(1,799.95-2,274.60)                                                               | 2,011.92<br>(1,788.05-2,251.44) | 2,028.59<br>(1,786.19-2,278.46) |
| Indonesia   | 0.01<br>(0.01-0.02)                                                                 | 0.12<br>(0.08-0.28) | 0.47<br>(0.34-0.77) | 6.35<br>(5.84-6.99)                                                                        | 4.86<br>(4.48-5.35) | 3.76<br>(3.44-4.17) | 42.07<br>(18.09-86.12)                                                         | 31.78<br>(12.56-69.91) | 15.15<br>(4.66-41.02) | 2,006.01<br>(1,789.29-2,261.75)                                                               | 1,999.29<br>(1,789.45-2,258.89) | 2,004.86<br>(1,786.26-2,256.21) |
| Laos        | 0.01<br>(0.01-0.02)                                                                 | 0.21<br>(0.13-0.56) | 0.30<br>(0.23-0.45) | 2.32<br>(2.15-2.51)                                                                        | 1.75<br>(1.61-1.91) | 1.25<br>(1.13-1.39) | 10.21<br>(5.90-14.39)                                                          | 7.74<br>(5.30-10.00)   | 6.06<br>(4.89-7.23)   | 2,040.38<br>(1,808.75-2,315.55)                                                               | 2,030.65<br>(1,804.01-2,300.47) | 2,022.46<br>(1,792.81-2,283.36) |
| Malaysia    | 0.20<br>(0.10-0.45)                                                                 | 0.22<br>(0.19-0.25) | 0.14<br>(0.12-0.16) | 1.07<br>(0.96-1.19)                                                                        | 0.99<br>(0.90-1.09) | 0.92<br>(0.81-1.03) | 0.69<br>(0.30-1.08)                                                            | 0.39<br>(0.38-0.40)    | 0.12<br>(0.12-0.12)   | 1,455.15<br>(1,303.82-1,644.14)                                                               | 1,459.92<br>(1,304.39-1,626.53) | 1,476.20<br>(1,311.43-1,655.21) |
| Maldives    | 0.01<br>(0.01-0.01)                                                                 | 0.01<br>(0.00-0.01) | 0.00<br>(0.00-0.01) | 0.86<br>(0.79-0.94)                                                                        | 0.56<br>(0.51-0.62) | 0.44<br>(0.38-0.51) | 0.00<br>(0.00-0.00)                                                            | 0.00<br>(0.00-0.00)    | 0.00<br>(0.00-0.00)   | 2,128.88<br>(1,691.23-2,623.28)                                                               | 2,122.71<br>(1,678.11-2,604.24) | 2,131.49<br>(1,716.04-2,620.03) |
| Mauritius   | 0.03<br>(0.02-0.04)                                                                 | 0.09<br>(0.07-0.12) | 0.12<br>(0.09-0.17) | 0.54<br>(0.47-0.60)                                                                        | 0.38<br>(0.34-0.43) | 0.41<br>(0.35-0.47) | 0.00<br>(0.00-0.00)                                                            | 0.00<br>(0.00-0.00)    | 0.00<br>(0.00-0.00)   | 2,128.55<br>(1,698.47-2,622.92)                                                               | 2,123.89<br>(1,680.91-2,616.03) | 2,132.49<br>(1,715.99-2,620.13) |

**Appendix Table 1b. Unscaled values for each SDG health-related indicator by country for 1990, 2000, and 2015**

| Location                       | Indicator 3.3.1: Age-standardised rate of new HIV infections (per 1,000 population) |                     |                     | Indicator 3.3.2: Age-standardised rate of new and relapsed TB cases (per 1,000 population) |                     |                     | Indicator 3.3.3: Age-standardised rate of malaria cases (per 1,000 population) |                           |                          | Indicator 3.3.4: Age-standardised rate of hepatitis B incident cases (per 100,000 population) |                                 |                                 |
|--------------------------------|-------------------------------------------------------------------------------------|---------------------|---------------------|--------------------------------------------------------------------------------------------|---------------------|---------------------|--------------------------------------------------------------------------------|---------------------------|--------------------------|-----------------------------------------------------------------------------------------------|---------------------------------|---------------------------------|
|                                | 1990                                                                                | 2000                | 2015                | 1990                                                                                       | 2000                | 2015                | 1990                                                                           | 2000                      | 2015                     | 1990                                                                                          | 2000                            | 2015                            |
| Myanmar                        | 1.18<br>(0.18-8.45)                                                                 | 0.88<br>(0.53-2.34) | 0.42<br>(0.32-0.63) | 2.61<br>(2.40-2.83)                                                                        | 2.24<br>(2.07-2.42) | 1.62<br>(1.48-1.78) | 278.09<br>(124.49-563.77)                                                      | 241.23<br>(108.52-487.43) | 119.35<br>(54.86-228.72) | 2,123.06<br>(1,696.18-2,619.54)                                                               | 2,119.99<br>(1,678.30-2,609.24) | 2,128.93<br>(1,715.69-2,617.71) |
| Philippines                    | 0.09<br>(0.03-0.26)                                                                 | 0.12<br>(0.07-0.21) | 0.34<br>(0.13-0.82) | 4.49<br>(4.20-4.80)                                                                        | 3.49<br>(3.27-3.73) | 2.33<br>(2.14-2.54) | 9.04<br>(6.37-11.50)                                                           | 6.71<br>(5.54-7.82)       | 7.22<br>(5.83-8.53)      | 2,130.02<br>(1,909.86-2,389.24)                                                               | 2,128.46<br>(1,896.82-2,409.08) | 2,124.62<br>(1,869.02-2,408.11) |
| Sri Lanka                      | 0.01<br>(0.01-0.03)                                                                 | 0.01<br>(0.01-0.03) | 0.01<br>(0.01-0.02) | 1.40<br>(1.29-1.49)                                                                        | 0.93<br>(0.87-0.99) | 0.60<br>(0.56-0.65) | 14.47<br>(14.21-14.92)                                                         | 10.46<br>(10.30-10.59)    | 0.00<br>(0.00-0.00)      | 1,928.64<br>(1,723.78-2,179.00)                                                               | 1,921.58<br>(1,715.51-2,150.29) | 1,916.12<br>(1,695.61-2,162.62) |
| Seychelles                     | 0.00<br>(0.00-0.00)                                                                 | 0.14<br>(0.07-0.28) | 0.14<br>(0.04-0.37) | 0.50<br>(0.44-0.57)                                                                        | 0.42<br>(0.37-0.48) | 0.46<br>(0.37-0.56) | 0.00<br>(0.00-0.00)                                                            | 0.00<br>(0.00-0.00)       | 0.00<br>(0.00-0.00)      | 2,128.75<br>(1,697.13-2,626.15)                                                               | 2,125.43<br>(1,682.72-2,615.98) | 2,137.51<br>(1,716.50-2,620.60) |
| Thailand                       | 0.99<br>(0.62-1.64)                                                                 | 0.40<br>(0.27-0.60) | 0.29<br>(0.20-0.45) | 1.49<br>(1.37-1.62)                                                                        | 1.24<br>(1.12-1.36) | 1.00<br>(0.90-1.11) | 6.09<br>(3.55-8.55)                                                            | 3.93<br>(3.22-4.62)       | 4.16<br>(3.41-4.88)      | 2,078.83<br>(1,851.95-2,352.12)                                                               | 2,065.99<br>(1,839.94-2,335.75) | 2,078.46<br>(1,845.92-2,328.53) |
| Timor-Leste                    | 0.33<br>(0.01-3.09)                                                                 | 0.17<br>(0.02-0.83) | 0.12<br>(0.02-0.45) | 2.14<br>(1.96-2.35)                                                                        | 2.02<br>(1.83-2.25) | 1.92<br>(1.70-2.18) | 23.89<br>(18.82-28.74)                                                         | 19.72<br>(16.25-23.14)    | 19.21<br>(15.65-22.65)   | 2,129.68<br>(1,698.76-2,625.78)                                                               | 2,127.03<br>(1,682.61-2,618.67) | 2,134.94<br>(1,716.82-2,619.87) |
| Vietnam                        | 0.01<br>(0.01-0.05)                                                                 | 0.26<br>(0.10-1.06) | 0.20<br>(0.12-0.42) | 1.72<br>(1.58-1.87)                                                                        | 1.32<br>(1.23-1.44) | 0.98<br>(0.90-1.07) | 8.58<br>(2.40-14.78)                                                           | 6.10<br>(1.92-10.32)      | 3.32<br>(1.41-5.27)      | 2,079.81<br>(1,855.66-2,351.05)                                                               | 2,077.95<br>(1,850.34-2,338.60) | 2,088.21<br>(1,861.29-2,360.49) |
| Federated States of Micronesia | 0.20<br>(0.03-1.16)                                                                 | 0.13<br>(0.05-0.44) | 0.14<br>(0.06-0.34) | 0.76<br>(0.70-0.85)                                                                        | 0.60<br>(0.54-0.66) | 0.58<br>(0.51-0.67) | 0.00<br>(0.00-0.00)                                                            | 0.00<br>(0.00-0.00)       | 0.00<br>(0.00-0.00)      | 2,526.03<br>(2,036.65-3,097.52)                                                               | 2,509.90<br>(1,992.08-3,097.96) | 2,522.15<br>(2,011.29-3,121.23) |
| Fiji                           | 0.04<br>(0.02-0.11)                                                                 | 0.05<br>(0.03-0.08) | 0.09<br>(0.05-0.15) | 0.63<br>(0.58-0.71)                                                                        | 0.52<br>(0.47-0.58) | 0.41<br>(0.37-0.46) | 0.00<br>(0.00-0.00)                                                            | 0.00<br>(0.00-0.00)       | 0.00<br>(0.00-0.00)      | 2,273.79<br>(2,027.00-2,569.58)                                                               | 2,274.52<br>(2,026.37-2,549.40) | 2,275.83<br>(2,014.64-2,559.13) |
| Kiribati                       | 0.03<br>(0.01-0.09)                                                                 | 0.03<br>(0.02-0.03) | 0.03<br>(0.01-0.04) | 3.37<br>(3.11-3.70)                                                                        | 2.64<br>(2.43-2.89) | 1.96<br>(1.79-2.19) | 0.00<br>(0.00-0.00)                                                            | 0.00<br>(0.00-0.00)       | 0.00<br>(0.00-0.00)      | 2,519.20<br>(2,036.56-3,090.39)                                                               | 2,504.98<br>(1,990.29-3,086.63) | 2,514.97<br>(2,011.16-3,090.41) |

**Appendix Table 1b. Unscaled values for each SDG health-related indicator by country for 1990, 2000, and 2015**

| Location         | Indicator 3.3.1: Age-standardised rate of new HIV infections (per 1,000 population) |                     |                     | Indicator 3.3.2: Age-standardised rate of new and relapsed TB cases (per 1,000 population) |                     |                     | Indicator 3.3.3: Age-standardised rate of malaria cases (per 1,000 population) |                          |                          | Indicator 3.3.4: Age-standardised rate of hepatitis B incident cases (per 100,000 population) |                                 |                                 |
|------------------|-------------------------------------------------------------------------------------|---------------------|---------------------|--------------------------------------------------------------------------------------------|---------------------|---------------------|--------------------------------------------------------------------------------|--------------------------|--------------------------|-----------------------------------------------------------------------------------------------|---------------------------------|---------------------------------|
|                  | 1990                                                                                | 2000                | 2015                | 1990                                                                                       | 2000                | 2015                | 1990                                                                           | 2000                     | 2015                     | 1990                                                                                          | 2000                            | 2015                            |
| Marshall Islands | 0.22<br>(0.00-2.08)                                                                 | 0.08<br>(0.01-0.60) | 0.10<br>(0.02-0.31) | 0.86<br>(0.77-0.96)                                                                        | 0.65<br>(0.60-0.73) | 0.56<br>(0.50-0.64) | 0.00<br>(0.00-0.00)                                                            | 0.00<br>(0.00-0.00)      | 0.00<br>(0.00-0.00)      | 2,526.39<br>(2,033.42-3,102.92)                                                               | 2,511.69<br>(1,994.99-3,102.76) | 2,521.74<br>(2,009.00-3,107.75) |
| Papua New Guinea | 0.20<br>(0.11-0.34)                                                                 | 0.41<br>(0.31-0.52) | 0.27<br>(0.20-0.36) | 0.82<br>(0.75-0.91)                                                                        | 0.86<br>(0.79-0.95) | 0.82<br>(0.73-0.91) | 142.76<br>(70.86-255.22)                                                       | 156.88<br>(76.32-283.70) | 123.02<br>(57.85-229.38) | 2,409.82<br>(2,155.43-2,731.62)                                                               | 2,401.46<br>(2,128.86-2,714.99) | 2,404.12<br>(2,117.66-2,707.09) |
| Samoa            | 0.21<br>(0.02-1.08)                                                                 | 0.11<br>(0.04-0.50) | 0.12<br>(0.05-0.32) | 0.53<br>(0.48-0.60)                                                                        | 0.39<br>(0.35-0.43) | 0.33<br>(0.28-0.39) | 0.00<br>(0.00-0.00)                                                            | 0.00<br>(0.00-0.00)      | 0.00<br>(0.00-0.00)      | 2,526.44<br>(2,036.25-3,116.89)                                                               | 2,515.42<br>(1,990.81-3,105.96) | 2,525.20<br>(2,008.11-3,119.53) |
| Solomon Islands  | 0.27<br>(0.06-1.64)                                                                 | 0.17<br>(0.09-0.60) | 0.14<br>(0.07-0.34) | 1.48<br>(1.35-1.64)                                                                        | 1.05<br>(0.96-1.16) | 0.73<br>(0.67-0.82) | 55.70<br>(33.31-77.36)                                                         | 45.73<br>(31.42-58.92)   | 39.63<br>(31.22-47.69)   | 2,375.87<br>(2,105.97-2,699.26)                                                               | 2,378.71<br>(2,113.91-2,689.31) | 2,365.31<br>(2,081.57-2,672.05) |
| Tonga            | 0.01<br>(0.00-0.02)                                                                 | 0.03<br>(0.02-0.04) | 0.10<br>(0.03-0.19) | 0.31<br>(0.26-0.37)                                                                        | 0.27<br>(0.23-0.33) | 0.35<br>(0.28-0.43) | 0.00<br>(0.00-0.00)                                                            | 0.00<br>(0.00-0.00)      | 0.00<br>(0.00-0.00)      | 2,522.89<br>(2,038.09-3,112.08)                                                               | 2,510.68<br>(1,993.43-3,096.12) | 2,518.60<br>(2,010.07-3,098.03) |
| Vanuatu          | 0.33<br>(0.07-3.20)                                                                 | 0.16<br>(0.08-0.49) | 0.14<br>(0.06-0.34) | 1.13<br>(1.03-1.24)                                                                        | 0.83<br>(0.77-0.91) | 0.57<br>(0.52-0.63) | 45.59<br>(25.83-64.82)                                                         | 39.31<br>(24.45-53.41)   | 32.82<br>(24.61-40.65)   | 2,527.31<br>(2,037.62-3,097.58)                                                               | 2,512.43<br>(2,000.72-3,105.76) | 2,520.25<br>(2,004.78-3,103.05) |
| Afghanistan      | 0.03<br>(0.00-0.20)                                                                 | 0.01<br>(0.00-0.05) | 0.03<br>(0.01-0.07) | 1.55<br>(1.41-1.73)                                                                        | 1.30<br>(1.19-1.43) | 1.01<br>(0.91-1.12) | 47.41<br>(10.77-84.21)                                                         | 51.28<br>(11.63-91.11)   | 29.70<br>(6.84-52.66)    | 2,142.10<br>(1,577.70-2,807.32)                                                               | 2,170.97<br>(1,595.50-2,828.66) | 2,149.26<br>(1,582.17-2,803.51) |
| Algeria          | 0.01<br>(0.01-0.02)                                                                 | 0.02<br>(0.02-0.03) | 0.02<br>(0.01-0.04) | 0.99<br>(0.89-1.09)                                                                        | 0.71<br>(0.64-0.78) | 0.55<br>(0.49-0.61) | 0.28<br>(0.00-0.57)                                                            | 0.00<br>(0.00-0.00)      | 0.00<br>(0.00-0.00)      | 2,140.24<br>(1,575.07-2,804.94)                                                               | 2,167.68<br>(1,593.52-2,827.73) | 2,144.74<br>(1,580.15-2,804.57) |
| Bahrain          | 0.03<br>(0.01-0.06)                                                                 | 0.03<br>(0.02-0.05) | 0.04<br>(0.02-0.08) | 0.56<br>(0.50-0.62)                                                                        | 0.44<br>(0.39-0.49) | 0.26<br>(0.22-0.31) | 0.00<br>(0.00-0.00)                                                            | 0.00<br>(0.00-0.00)      | 0.00<br>(0.00-0.00)      | 2,163.90<br>(1,584.81-2,852.08)                                                               | 2,191.33<br>(1,599.62-2,869.06) | 2,180.83<br>(1,592.87-2,862.92) |
| Egypt            | 0.00<br>(0.00-0.00)                                                                 | 0.00<br>(0.00-0.01) | 0.01<br>(0.01-0.02) | 0.33<br>(0.30-0.37)                                                                        | 0.23<br>(0.20-0.26) | 0.17<br>(0.14-0.20) | 0.04<br>(0.01-0.07)                                                            | 0.04<br>(0.01-0.07)      | 0.00<br>(0.00-0.00)      | 1,742.01<br>(1,554.76-1,951.12)                                                               | 1,743.30<br>(1,561.71-1,950.24) | 1,740.17<br>(1,548.71-1,958.57) |

**Appendix Table 1b. Unscaled values for each SDG health-related indicator by country for 1990, 2000, and 2015**

| Location  | Indicator 3.3.1: Age-standardised rate of new HIV infections (per 1,000 population) |                     |                     | Indicator 3.3.2: Age-standardised rate of new and relapsed TB cases (per 1,000 population) |                     |                     | Indicator 3.3.3: Age-standardised rate of malaria cases (per 1,000 population) |                     |                     | Indicator 3.3.4: Age-standardised rate of hepatitis B incident cases (per 100,000 population) |                                 |                                 |
|-----------|-------------------------------------------------------------------------------------|---------------------|---------------------|--------------------------------------------------------------------------------------------|---------------------|---------------------|--------------------------------------------------------------------------------|---------------------|---------------------|-----------------------------------------------------------------------------------------------|---------------------------------|---------------------------------|
|           | 1990                                                                                | 2000                | 2015                | 1990                                                                                       | 2000                | 2015                | 1990                                                                           | 2000                | 2015                | 1990                                                                                          | 2000                            | 2015                            |
| Iran      | 0.02<br>(0.02-0.03)                                                                 | 0.04<br>(0.03-0.05) | 0.07<br>(0.06-0.08) | 0.38<br>(0.34-0.43)                                                                        | 0.29<br>(0.26-0.32) | 0.32<br>(0.28-0.36) | 0.95<br>(0.87-1.04)                                                            | 0.15<br>(0.15-0.16) | 0.01<br>(0.01-0.01) | 1,391.80<br>(1,250.48-1,560.50)                                                               | 1,378.15<br>(1,239.05-1,544.87) | 1,384.90<br>(1,239.19-1,554.82) |
| Iraq      | 0.00<br>(0.00-0.00)                                                                 | 0.01<br>(0.00-0.01) | 0.02<br>(0.00-0.03) | 1.08<br>(0.97-1.20)                                                                        | 0.79<br>(0.72-0.87) | 0.59<br>(0.53-0.66) | 0.16<br>(0.15-0.18)                                                            | 0.06<br>(0.05-0.06) | 0.00<br>(0.00-0.00) | 2,138.71<br>(1,574.61-2,803.98)                                                               | 2,165.40<br>(1,591.74-2,818.96) | 2,144.56<br>(1,582.88-2,806.57) |
| Jordan    | 0.00<br>(0.00-0.00)                                                                 | 0.00<br>(0.00-0.01) | 0.00<br>(0.00-0.01) | 0.13<br>(0.11-0.15)                                                                        | 0.10<br>(0.08-0.12) | 0.10<br>(0.08-0.13) | 0.00<br>(0.00-0.00)                                                            | 0.00<br>(0.00-0.00) | 0.00<br>(0.00-0.00) | 1,852.88<br>(1,658.13-2,090.44)                                                               | 1,842.23<br>(1,642.94-2,068.94) | 1,838.77<br>(1,628.76-2,062.43) |
| Kuwait    | 0.01<br>(0.00-0.02)                                                                 | 0.00<br>(0.00-0.01) | 0.00<br>(0.00-0.01) | 0.78<br>(0.69-0.86)                                                                        | 0.50<br>(0.46-0.55) | 0.29<br>(0.26-0.33) | 0.00<br>(0.00-0.00)                                                            | 0.00<br>(0.00-0.00) | 0.00<br>(0.00-0.00) | 2,148.68<br>(1,580.91-2,820.89)                                                               | 2,195.47<br>(1,604.00-2,883.70) | 2,161.16<br>(1,589.09-2,826.76) |
| Lebanon   | 0.09<br>(0.02-0.62)                                                                 | 0.03<br>(0.01-0.10) | 0.03<br>(0.01-0.07) | 0.30<br>(0.27-0.34)                                                                        | 0.19<br>(0.17-0.22) | 0.17<br>(0.15-0.21) | 0.00<br>(0.00-0.00)                                                            | 0.00<br>(0.00-0.00) | 0.00<br>(0.00-0.00) | 2,134.49<br>(1,573.36-2,798.50)                                                               | 2,163.72<br>(1,590.77-2,813.15) | 2,143.80<br>(1,580.43-2,793.14) |
| Libya     | 0.07<br>(0.02-0.34)                                                                 | 0.05<br>(0.03-0.18) | 0.06<br>(0.02-0.16) | 0.42<br>(0.37-0.48)                                                                        | 0.31<br>(0.27-0.35) | 0.28<br>(0.24-0.33) | 0.00<br>(0.00-0.00)                                                            | 0.00<br>(0.00-0.00) | 0.00<br>(0.00-0.00) | 2,150.41<br>(1,578.88-2,823.05)                                                               | 2,174.00<br>(1,596.45-2,832.89) | 2,143.84<br>(1,578.76-2,795.27) |
| Morocco   | 0.02<br>(0.01-0.02)                                                                 | 0.04<br>(0.03-0.05) | 0.05<br>(0.04-0.06) | 1.39<br>(1.28-1.52)                                                                        | 0.98<br>(0.91-1.05) | 0.79<br>(0.72-0.87) | 0.04<br>(0.01-0.07)                                                            | 0.00<br>(0.00-0.00) | 0.00<br>(0.00-0.00) | 2,137.32<br>(1,572.06-2,801.58)                                                               | 2,163.31<br>(1,590.12-2,820.04) | 2,141.25<br>(1,580.67-2,801.45) |
| Palestine | 0.00<br>(0.00-0.01)                                                                 | 0.01<br>(0.01-0.02) | 0.02<br>(0.01-0.03) | 0.15<br>(0.11-0.20)                                                                        | 0.23<br>(0.18-0.29) | 0.24<br>(0.18-0.31) | 0.00<br>(0.00-0.00)                                                            | 0.00<br>(0.00-0.00) | 0.00<br>(0.00-0.00) | 2,140.17<br>(1,573.57-2,809.74)                                                               | 2,167.13<br>(1,592.24-2,826.13) | 2,145.33<br>(1,580.55-2,804.05) |
| Oman      | 0.01<br>(0.01-0.02)                                                                 | 0.04<br>(0.03-0.06) | 0.03<br>(0.02-0.04) | 0.36<br>(0.31-0.41)                                                                        | 0.25<br>(0.21-0.29) | 0.22<br>(0.18-0.27) | 0.03<br>(0.01-0.06)                                                            | 0.03<br>(0.01-0.06) | 0.00<br>(0.00-0.00) | 2,162.01<br>(1,581.27-2,858.55)                                                               | 2,191.90<br>(1,598.52-2,870.76) | 2,192.31<br>(1,598.82-2,893.65) |
| Qatar     | 0.01<br>(0.00-0.03)                                                                 | 0.01<br>(0.00-0.01) | 0.00<br>(0.00-0.01) | 0.35<br>(0.29-0.41)                                                                        | 0.35<br>(0.29-0.42) | 0.33<br>(0.28-0.39) | 0.00<br>(0.00-0.00)                                                            | 0.00<br>(0.00-0.00) | 0.00<br>(0.00-0.00) | 2,191.02<br>(1,598.56-2,914.18)                                                               | 2,215.46<br>(1,612.71-2,918.24) | 2,210.82<br>(1,609.38-2,937.36) |

**Appendix Table 1b. Unscaled values for each SDG health-related indicator by country for 1990, 2000, and 2015**

| Location             | Indicator 3.3.1: Age-standardised rate of new HIV infections (per 1,000 population) |                     |                     | Indicator 3.3.2: Age-standardised rate of new and relapsed TB cases (per 1,000 population) |                     |                     | Indicator 3.3.3: Age-standardised rate of malaria cases (per 1,000 population) |                         |                         | Indicator 3.3.4: Age-standardised rate of hepatitis B incident cases (per 100,000 population) |                                 |                                 |
|----------------------|-------------------------------------------------------------------------------------|---------------------|---------------------|--------------------------------------------------------------------------------------------|---------------------|---------------------|--------------------------------------------------------------------------------|-------------------------|-------------------------|-----------------------------------------------------------------------------------------------|---------------------------------|---------------------------------|
|                      | 1990                                                                                | 2000                | 2015                | 1990                                                                                       | 2000                | 2015                | 1990                                                                           | 2000                    | 2015                    | 1990                                                                                          | 2000                            | 2015                            |
| Saudi Arabia         | 0.04<br>(0.01-0.18)                                                                 | 0.03<br>(0.02-0.07) | 0.04<br>(0.02-0.07) | 0.72<br>(0.62-0.85)                                                                        | 0.47<br>(0.41-0.56) | 0.32<br>(0.27-0.38) | 0.70<br>(0.64-0.76)                                                            | 0.18<br>(0.17-0.19)     | 0.00<br>(0.00-0.00)     | 1,698.23<br>(1,517.90-1,907.20)                                                               | 1,676.69<br>(1,506.54-1,876.72) | 1,761.90<br>(1,571.37-1,986.86) |
| Sudan                | 0.16<br>(0.06-0.31)                                                                 | 0.22<br>(0.15-0.31) | 0.16<br>(0.07-0.28) | 0.80<br>(0.73-0.88)                                                                        | 0.76<br>(0.70-0.82) | 0.56<br>(0.51-0.63) | 40.27<br>(26.46-60.46)                                                         | 51.97<br>(34.11-75.19)  | 26.88<br>(20.31-36.49)  | 1,858.77<br>(1,655.01-2,099.80)                                                               | 1,837.28<br>(1,633.31-2,071.87) | 1,847.23<br>(1,627.91-2,092.59) |
| Syria                | 0.00<br>(0.00-0.00)                                                                 | 0.00<br>(0.00-0.00) | 0.00<br>(0.00-0.01) | 0.13<br>(0.11-0.16)                                                                        | 0.15<br>(0.12-0.18) | 0.18<br>(0.14-0.21) | 0.04<br>(0.01-0.07)                                                            | 0.04<br>(0.01-0.07)     | 0.00<br>(0.00-0.00)     | 1,811.85<br>(1,611.67-2,045.27)                                                               | 1,818.61<br>(1,623.67-2,047.44) | 1,821.10<br>(1,615.18-2,046.44) |
| Tunisia              | 0.01<br>(0.01-0.01)                                                                 | 0.01<br>(0.01-0.02) | 0.03<br>(0.02-0.05) | 0.52<br>(0.47-0.58)                                                                        | 0.33<br>(0.31-0.35) | 0.30<br>(0.27-0.34) | 0.00<br>(0.00-0.00)                                                            | 0.00<br>(0.00-0.00)     | 0.00<br>(0.00-0.00)     | 2,138.92<br>(1,573.53-2,799.54)                                                               | 2,165.31<br>(1,591.22-2,821.92) | 2,142.32<br>(1,580.26-2,800.02) |
| Turkey               | 0.00<br>(0.00-0.00)                                                                 | 0.01<br>(0.00-0.01) | 0.01<br>(0.01-0.02) | 0.51<br>(0.45-0.56)                                                                        | 0.32<br>(0.29-0.36) | 0.22<br>(0.19-0.26) | 0.19<br>(0.06-0.33)                                                            | 0.16<br>(0.16-0.16)     | 0.00<br>(0.00-0.00)     | 1,837.82<br>(1,646.48-2,064.40)                                                               | 1,831.82<br>(1,646.26-2,062.14) | 1,838.39<br>(1,645.79-2,071.49) |
| United Arab Emirates | 0.06<br>(0.01-0.32)                                                                 | 0.04<br>(0.01-0.19) | 0.05<br>(0.01-0.16) | 0.49<br>(0.43-0.56)                                                                        | 0.30<br>(0.26-0.34) | 0.23<br>(0.18-0.28) | 0.08<br>(0.02-0.15)                                                            | 0.00<br>(0.00-0.00)     | 0.00<br>(0.00-0.00)     | 2,189.52<br>(1,598.92-2,915.92)                                                               | 2,224.64<br>(1,614.16-2,940.86) | 2,207.43<br>(1,613.51-2,913.16) |
| Yemen                | 0.06<br>(0.03-0.31)                                                                 | 0.05<br>(0.04-0.11) | 0.04<br>(0.02-0.08) | 1.14<br>(1.03-1.26)                                                                        | 0.95<br>(0.87-1.04) | 0.64<br>(0.58-0.72) | 6.03<br>(1.17-18.72)                                                           | 5.64<br>(1.11-17.40)    | 4.48<br>(0.79-14.91)    | 1,934.73<br>(1,727.68-2,179.94)                                                               | 1,920.16<br>(1,703.88-2,167.86) | 1,914.56<br>(1,690.42-2,148.53) |
| Bangladesh           | 0.00<br>(0.00-0.00)                                                                 | 0.01<br>(0.01-0.02) | 0.03<br>(0.03-0.04) | 1.89<br>(1.75-2.03)                                                                        | 1.31<br>(1.21-1.40) | 1.16<br>(1.06-1.29) | 16.46<br>(4.65-28.32)                                                          | 8.56<br>(3.01-14.17)    | 6.28<br>(2.74-9.88)     | 1,588.59<br>(1,420.62-1,781.46)                                                               | 1,582.77<br>(1,418.62-1,768.08) | 1,582.11<br>(1,411.03-1,778.45) |
| Bhutan               | 0.08<br>(0.01-0.66)                                                                 | 0.07<br>(0.03-0.29) | 0.08<br>(0.02-0.22) | 2.96<br>(2.64-3.35)                                                                        | 2.56<br>(2.27-2.91) | 1.99<br>(1.75-2.31) | 13.53<br>(12.43-14.83)                                                         | 8.18<br>(7.76-8.66)     | 0.10<br>(0.09-0.10)     | 1,665.56<br>(1,492.67-1,885.96)                                                               | 1,663.89<br>(1,483.53-1,865.99) | 1,653.54<br>(1,465.76-1,857.98) |
| India                | 0.13<br>(0.12-0.15)                                                                 | 0.50<br>(0.47-0.55) | 0.24<br>(0.21-0.27) | 4.39<br>(3.85-5.09)                                                                        | 3.72<br>(3.26-4.38) | 2.28<br>(2.00-2.60) | 75.61<br>(38.02-136.54)                                                        | 73.99<br>(36.50-133.86) | 52.60<br>(24.42-102.36) | 1,459.49<br>(1,316.46-1,629.45)                                                               | 1,447.86<br>(1,300.82-1,619.52) | 1,454.83<br>(1,292.71-1,625.50) |

**Appendix Table 1b. Unscaled values for each SDG health-related indicator by country for 1990, 2000, and 2015**

| Location     | Indicator 3.3.1: Age-standardised rate of new HIV infections (per 1,000 population) |                        |                        | Indicator 3.3.2: Age-standardised rate of new and relapsed TB cases (per 1,000 population) |                        |                        | Indicator 3.3.3: Age-standardised rate of malaria cases (per 1,000 population) |                           |                           | Indicator 3.3.4: Age-standardised rate of hepatitis B incident cases (per 100,000 population) |                                 |                                 |
|--------------|-------------------------------------------------------------------------------------|------------------------|------------------------|--------------------------------------------------------------------------------------------|------------------------|------------------------|--------------------------------------------------------------------------------|---------------------------|---------------------------|-----------------------------------------------------------------------------------------------|---------------------------------|---------------------------------|
|              | 1990                                                                                | 2000                   | 2015                   | 1990                                                                                       | 2000                   | 2015                   | 1990                                                                           | 2000                      | 2015                      | 1990                                                                                          | 2000                            | 2015                            |
| Nepal        | 0.00<br>(0.00-0.01)                                                                 | 0.25<br>(0.07-1.12)    | 0.08<br>(0.05-0.16)    | 3.83<br>(3.51-4.20)                                                                        | 2.87<br>(2.61-3.20)    | 2.07<br>(1.88-2.28)    | 8.13<br>(1.94-14.34)                                                           | 8.32<br>(1.99-14.67)      | 7.24<br>(1.78-12.72)      | 1,452.61<br>(1,298.40-1,627.39)                                                               | 1,454.43<br>(1,302.51-1,635.08) | 1,461.96<br>(1,296.46-1,638.31) |
| Pakistan     | 0.01<br>(0.00-0.04)                                                                 | 0.01<br>(0.01-0.03)    | 0.06<br>(0.02-0.15)    | 2.61<br>(2.38-2.87)                                                                        | 2.06<br>(1.91-2.26)    | 1.76<br>(1.62-1.93)    | 13.84<br>(4.51-23.27)                                                          | 15.43<br>(4.90-26.07)     | 14.11<br>(4.72-23.61)     | 1,598.16<br>(1,438.55-1,800.08)                                                               | 1,587.32<br>(1,425.44-1,787.05) | 1,588.42<br>(1,420.57-1,780.85) |
| Botswana     | 16.30<br>(14.84-17.86)                                                              | 40.31<br>(36.17-45.15) | 22.33<br>(18.40-27.10) | 12.36<br>(10.95-14.10)                                                                     | 31.36<br>(27.97-35.25) | 22.36<br>(19.78-25.32) | 9.50<br>(5.90-14.85)                                                           | 10.08<br>(6.35-15.95)     | 6.94<br>(3.68-12.19)      | 2,044.80<br>(1,706.37-2,438.18)                                                               | 2,037.68<br>(1,696.27-2,408.44) | 2,045.13<br>(1,708.22-2,409.53) |
| Lesotho      | 5.83<br>(4.98-6.74)                                                                 | 30.87<br>(28.13-34.05) | 26.29<br>(22.66-30.49) | 7.43<br>(6.61-8.46)                                                                        | 17.10<br>(15.59-18.94) | 22.78<br>(20.77-25.30) | 0.00<br>(0.00-0.00)                                                            | 0.00<br>(0.00-0.00)       | 0.00<br>(0.00-0.00)       | 2,043.38<br>(1,707.87-2,429.23)                                                               | 2,035.91<br>(1,702.52-2,409.89) | 2,044.42<br>(1,704.93-2,407.94) |
| Namibia      | 4.65<br>(4.28-5.00)                                                                 | 24.65<br>(22.47-27.37) | 12.71<br>(10.97-14.72) | 9.48<br>(8.44-10.73)                                                                       | 19.68<br>(17.78-22.17) | 14.10<br>(12.63-15.95) | 83.13<br>(41.04-153.87)                                                        | 86.02<br>(43.18-157.87)   | 45.82<br>(14.34-84.62)    | 1,983.99<br>(1,780.80-2,226.36)                                                               | 1,982.54<br>(1,775.04-2,220.38) | 1,977.95<br>(1,747.98-2,232.91) |
| South Africa | 1.01<br>(0.91-1.11)                                                                 | 23.27<br>(21.65-25.10) | 16.50<br>(14.49-18.61) | 5.94<br>(4.90-6.93)                                                                        | 14.89<br>(12.52-17.87) | 15.74<br>(13.29-19.23) | 0.38<br>(0.19-0.58)                                                            | 0.00<br>(0.00-0.00)       | 0.10<br>(0.09-0.10)       | 2,044.09<br>(1,822.32-2,317.99)                                                               | 2,031.07<br>(1,803.27-2,299.62) | 2,038.45<br>(1,800.09-2,298.09) |
| Swaziland    | 13.12<br>(11.15-15.41)                                                              | 42.93<br>(38.98-47.61) | 27.43<br>(23.34-31.28) | 9.84<br>(8.75-11.25)                                                                       | 28.01<br>(25.20-31.65) | 26.13<br>(23.21-29.47) | 0.34<br>(0.21-0.49)                                                            | 0.37<br>(0.22-0.52)       | 0.24<br>(0.04-0.90)       | 2,041.56<br>(1,706.71-2,430.68)                                                               | 2,035.73<br>(1,703.29-2,404.89) | 2,044.37<br>(1,705.42-2,410.45) |
| Zimbabwe     | 23.58<br>(21.49-25.75)                                                              | 23.00<br>(19.50-27.29) | 12.56<br>(9.12-17.31)  | 6.74<br>(6.06-7.53)                                                                        | 14.16<br>(13.15-15.36) | 9.50<br>(8.64-10.43)   | 24.85<br>(18.16-34.02)                                                         | 24.80<br>(18.16-34.04)    | 29.18<br>(14.23-58.51)    | 1,996.63<br>(1,785.10-2,250.87)                                                               | 1,990.41<br>(1,776.41-2,246.46) | 1,979.08<br>(1,754.05-2,227.56) |
| Benin        | 0.88<br>(0.50-1.46)                                                                 | 1.33<br>(1.05-1.63)    | 0.71<br>(0.51-0.99)    | 1.71<br>(1.58-1.89)                                                                        | 1.84<br>(1.71-2.02)    | 1.41<br>(1.29-1.54)    | 185.04<br>(103.46-279.27)                                                      | 199.75<br>(119.04-290.65) | 209.30<br>(160.72-266.34) | 2,096.78<br>(1,761.09-2,445.94)                                                               | 2,087.47<br>(1,746.88-2,478.21) | 2,098.54<br>(1,756.30-2,456.98) |
| Burkina Faso | 3.68<br>(2.75-4.86)                                                                 | 1.37<br>(1.01-1.79)    | 0.63<br>(0.44-0.85)    | 2.54<br>(2.35-2.81)                                                                        | 2.65<br>(2.46-2.90)    | 1.84<br>(1.70-2.01)    | 334.01<br>(266.52-410.08)                                                      | 347.75<br>(278.22-427.00) | 267.48<br>(166.05-379.23) | 2,096.54<br>(1,761.17-2,448.10)                                                               | 2,087.43<br>(1,745.57-2,483.12) | 2,098.46<br>(1,760.60-2,454.73) |

**Appendix Table 1b. Unscaled values for each SDG health-related indicator by country for 1990, 2000, and 2015**

| Location      | Indicator 3.3.1: Age-standardised rate of new HIV infections (per 1,000 population) |                     |                     | Indicator 3.3.2: Age-standardised rate of new and relapsed TB cases (per 1,000 population) |                     |                     | Indicator 3.3.3: Age-standardised rate of malaria cases (per 1,000 population) |                           |                           | Indicator 3.3.4: Age-standardised rate of hepatitis B incident cases (per 100,000 population) |                                 |                                 |
|---------------|-------------------------------------------------------------------------------------|---------------------|---------------------|--------------------------------------------------------------------------------------------|---------------------|---------------------|--------------------------------------------------------------------------------|---------------------------|---------------------------|-----------------------------------------------------------------------------------------------|---------------------------------|---------------------------------|
|               | 1990                                                                                | 2000                | 2015                | 1990                                                                                       | 2000                | 2015                | 1990                                                                           | 2000                      | 2015                      | 1990                                                                                          | 2000                            | 2015                            |
| Cameroon      | 3.23<br>(2.21-4.69)                                                                 | 4.90<br>(4.10-5.84) | 3.06<br>(2.12-4.32) | 2.04<br>(1.87-2.29)                                                                        | 2.58<br>(2.34-2.86) | 1.94<br>(1.75-2.16) | 203.73<br>(149.92-275.28)                                                      | 235.90<br>(176.22-303.31) | 170.70<br>(121.71-232.21) | 2,054.57<br>(1,831.43-2,319.78)                                                               | 2,044.82<br>(1,819.52-2,291.08) | 2,066.01<br>(1,825.18-2,332.26) |
| Cape Verde    | 0.64<br>(0.39-0.98)                                                                 | 0.56<br>(0.39-0.76) | 0.62<br>(0.30-1.58) | 0.85<br>(0.78-0.93)                                                                        | 0.67<br>(0.61-0.74) | 0.57<br>(0.50-0.65) | 20.80<br>(2.36-39.63)                                                          | 0.22<br>(0.21-0.24)       | 0.00<br>(0.00-0.00)       | 2,098.67<br>(1,761.97-2,462.34)                                                               | 2,088.00<br>(1,741.78-2,476.50) | 2,097.96<br>(1,761.18-2,454.60) |
| Chad          | 1.62<br>(0.99-2.54)                                                                 | 2.94<br>(2.32-3.67) | 1.20<br>(0.73-1.84) | 2.33<br>(2.16-2.58)                                                                        | 2.83<br>(2.62-3.08) | 2.35<br>(2.14-2.61) | 128.60<br>(64.89-246.19)                                                       | 135.42<br>(68.94-255.58)  | 101.03<br>(37.60-227.41)  | 2,095.93<br>(1,757.84-2,445.79)                                                               | 2,086.80<br>(1,747.79-2,475.27) | 2,098.34<br>(1,759.07-2,454.19) |
| Cote d'Ivoire | 4.09<br>(3.02-5.33)                                                                 | 4.26<br>(3.38-5.26) | 2.59<br>(1.74-3.69) | 2.63<br>(2.39-2.93)                                                                        | 3.19<br>(2.92-3.55) | 2.14<br>(1.94-2.37) | 306.42<br>(242.10-376.87)                                                      | 314.96<br>(250.00-390.33) | 265.58<br>(206.56-347.11) | 2,093.65<br>(1,749.47-2,452.03)                                                               | 2,085.11<br>(1,743.63-2,477.42) | 2,097.90<br>(1,754.53-2,447.89) |
| The Gambia    | 0.25<br>(0.17-0.35)                                                                 | 1.41<br>(1.12-1.80) | 0.70<br>(0.37-1.13) | 1.57<br>(1.45-1.72)                                                                        | 1.55<br>(1.43-1.71) | 1.35<br>(1.22-1.51) | 142.25<br>(101.45-211.01)                                                      | 153.25<br>(110.03-220.45) | 23.10<br>(12.44-43.30)    | 2,095.70<br>(1,752.13-2,454.82)                                                               | 2,087.56<br>(1,747.08-2,470.19) | 2,099.04<br>(1,754.50-2,453.12) |
| Ghana         | 1.75<br>(1.33-2.27)                                                                 | 2.23<br>(1.83-2.69) | 0.98<br>(0.69-1.33) | 2.21<br>(2.04-2.45)                                                                        | 2.29<br>(2.13-2.54) | 1.51<br>(1.38-1.67) | 264.46<br>(212.92-336.65)                                                      | 284.29<br>(231.28-357.28) | 209.21<br>(144.82-300.12) | 2,037.24<br>(1,815.46-2,300.94)                                                               | 2,037.75<br>(1,819.01-2,300.30) | 2,044.11<br>(1,805.59-2,310.68) |
| Guinea        | 1.02<br>(0.60-1.81)                                                                 | 1.79<br>(1.51-2.17) | 1.18<br>(0.74-1.67) | 1.93<br>(1.77-2.15)                                                                        | 2.35<br>(2.16-2.60) | 1.86<br>(1.70-2.05) | 251.80<br>(197.44-314.27)                                                      | 272.33<br>(215.70-339.26) | 273.06<br>(222.01-326.48) | 2,095.93<br>(1,757.10-2,446.39)                                                               | 2,086.71<br>(1,747.18-2,472.74) | 2,098.17<br>(1,757.60-2,453.20) |
| Guinea-Bissau | 0.56<br>(0.40-0.81)                                                                 | 3.11<br>(2.65-3.65) | 2.46<br>(1.73-3.46) | 2.06<br>(1.89-2.28)                                                                        | 2.63<br>(2.42-2.91) | 3.03<br>(2.76-3.34) | 218.79<br>(133.46-322.87)                                                      | 220.63<br>(135.73-323.31) | 60.60<br>(25.32-134.00)   | 2,096.08<br>(1,757.14-2,445.88)                                                               | 2,087.14<br>(1,747.89-2,473.73) | 2,098.65<br>(1,757.76-2,453.61) |
| Liberia       | 1.36<br>(0.90-2.04)                                                                 | 1.91<br>(1.46-2.43) | 0.81<br>(0.46-1.28) | 3.22<br>(2.97-3.57)                                                                        | 2.97<br>(2.71-3.30) | 2.63<br>(2.35-2.96) | 244.45<br>(148.62-380.19)                                                      | 275.70<br>(180.60-398.56) | 210.70<br>(146.04-313.87) | 2,095.80<br>(1,756.71-2,446.48)                                                               | 2,086.56<br>(1,747.80-2,473.62) | 2,097.88<br>(1,758.58-2,454.39) |
| Mali          | 1.14<br>(0.66-1.72)                                                                 | 1.44<br>(1.13-1.81) | 0.92<br>(0.55-1.35) | 2.05<br>(1.92-2.22)                                                                        | 1.92<br>(1.79-2.08) | 1.47<br>(1.35-1.62) | 268.21<br>(202.51-332.37)                                                      | 276.04<br>(209.21-342.01) | 286.80<br>(237.89-357.73) | 2,096.01<br>(1,759.95-2,447.29)                                                               | 2,086.45<br>(1,744.37-2,481.24) | 2,097.65<br>(1,759.25-2,453.33) |

**Appendix Table 1b. Unscaled values for each SDG health-related indicator by country for 1990, 2000, and 2015**

| Location              | Indicator 3.3.1: Age-standardised rate of new HIV infections (per 1,000 population) |                     |                     | Indicator 3.3.2: Age-standardised rate of new and relapsed TB cases (per 1,000 population) |                     |                     | Indicator 3.3.3: Age-standardised rate of malaria cases (per 1,000 population) |                           |                           | Indicator 3.3.4: Age-standardised rate of hepatitis B incident cases (per 100,000 population) |                                 |                                 |
|-----------------------|-------------------------------------------------------------------------------------|---------------------|---------------------|--------------------------------------------------------------------------------------------|---------------------|---------------------|--------------------------------------------------------------------------------|---------------------------|---------------------------|-----------------------------------------------------------------------------------------------|---------------------------------|---------------------------------|
|                       | 1990                                                                                | 2000                | 2015                | 1990                                                                                       | 2000                | 2015                | 1990                                                                           | 2000                      | 2015                      | 1990                                                                                          | 2000                            | 2015                            |
| Mauritania            | 0.46<br>(0.12-3.37)                                                                 | 0.58<br>(0.29-1.96) | 0.17<br>(0.13-0.25) | 2.02<br>(1.84-2.24)                                                                        | 1.75<br>(1.60-1.92) | 1.20<br>(1.08-1.33) | 46.60<br>(19.29-91.18)                                                         | 56.31<br>(22.45-104.86)   | 33.30<br>(15.04-57.18)    | 2,095.35<br>(1,759.27-2,443.61)                                                               | 2,086.27<br>(1,745.88-2,478.27) | 2,097.94<br>(1,757.06-2,455.58) |
| Niger                 | 0.64<br>(0.49-0.83)                                                                 | 1.25<br>(1.01-1.55) | 0.30<br>(0.19-0.48) | 2.42<br>(2.23-2.66)                                                                        | 2.46<br>(2.27-2.67) | 2.00<br>(1.83-2.22) | 195.07<br>(95.15-317.84)                                                       | 208.55<br>(107.19-332.29) | 222.36<br>(123.99-308.48) | 2,096.49<br>(1,754.37-2,450.05)                                                               | 2,087.66<br>(1,750.65-2,472.87) | 2,098.85<br>(1,759.57-2,453.99) |
| Nigeria               | 1.99<br>(1.16-3.21)                                                                 | 2.66<br>(2.11-3.30) | 1.91<br>(1.22-2.67) | 1.84<br>(1.66-2.05)                                                                        | 1.79<br>(1.62-1.97) | 1.71<br>(1.52-1.94) | 255.75<br>(198.60-331.79)                                                      | 269.54<br>(213.59-344.99) | 225.61<br>(162.29-296.68) | 2,073.84<br>(1,850.37-2,340.60)                                                               | 2,076.47<br>(1,855.48-2,338.95) | 2,079.11<br>(1,829.95-2,349.01) |
| Sao Tome and Principe | 0.02<br>(0.02-0.02)                                                                 | 0.06<br>(0.06-0.07) | 0.07<br>(0.06-0.08) | 1.02<br>(0.95-1.11)                                                                        | 0.94<br>(0.87-1.04) | 0.86<br>(0.77-0.96) | 21.58<br>(17.79-25.24)                                                         | 21.46<br>(17.69-25.04)    | 21.58<br>(17.42-25.57)    | 2,096.29<br>(1,760.37-2,448.83)                                                               | 2,086.86<br>(1,746.13-2,481.72) | 2,098.36<br>(1,759.09-2,456.70) |
| Senegal               | 0.42<br>(0.34-0.52)                                                                 | 0.92<br>(0.77-1.10) | 0.54<br>(0.31-0.76) | 3.12<br>(2.87-3.49)                                                                        | 2.84<br>(2.64-3.12) | 2.40<br>(2.20-2.65) | 165.49<br>(127.60-228.88)                                                      | 177.38<br>(136.02-244.54) | 45.33<br>(33.62-58.76)    | 2,095.88<br>(1,757.59-2,446.35)                                                               | 2,087.60<br>(1,747.56-2,474.35) | 2,098.98<br>(1,758.78-2,454.71) |
| Sierra Leone          | 0.45<br>(0.16-0.86)                                                                 | 1.37<br>(1.11-1.70) | 0.89<br>(0.39-1.41) | 1.88<br>(1.73-2.07)                                                                        | 2.14<br>(1.99-2.34) | 1.84<br>(1.68-2.06) | 256.46<br>(146.28-382.52)                                                      | 285.71<br>(172.11-397.19) | 252.28<br>(178.12-340.80) | 2,082.55<br>(1,865.49-2,365.25)                                                               | 2,070.80<br>(1,848.74-2,336.97) | 2,063.88<br>(1,823.93-2,331.86) |
| Togo                  | 1.66<br>(1.30-2.10)                                                                 | 3.85<br>(3.12-4.73) | 1.01<br>(0.62-1.62) | 1.51<br>(1.40-1.66)                                                                        | 1.69<br>(1.57-1.83) | 1.29<br>(1.19-1.42) | 295.86<br>(216.28-387.76)                                                      | 298.09<br>(219.01-388.30) | 261.76<br>(219.24-321.11) | 2,096.15<br>(1,757.33-2,446.11)                                                               | 2,087.86<br>(1,748.34-2,473.77) | 2,098.69<br>(1,758.59-2,456.42) |
| Burundi               | 4.19<br>(3.02-5.51)                                                                 | 2.86<br>(2.25-3.52) | 1.11<br>(0.78-1.59) | 3.82<br>(3.42-4.26)                                                                        | 4.12<br>(3.80-4.51) | 2.13<br>(1.96-2.34) | 255.86<br>(167.83-341.82)                                                      | 264.70<br>(180.08-345.05) | 104.61<br>(73.50-145.41)  | 2,032.72<br>(1,813.66-2,280.28)                                                               | 2,033.78<br>(1,818.48-2,288.79) | 2,027.72<br>(1,794.89-2,285.98) |
| Comoros               | 0.02<br>(0.00-0.11)                                                                 | 0.10<br>(0.03-0.43) | 0.11<br>(0.04-0.29) | 1.70<br>(1.53-1.89)                                                                        | 1.38<br>(1.26-1.52) | 1.08<br>(0.97-1.21) | 57.01<br>(44.93-68.58)                                                         | 53.52<br>(43.42-63.05)    | 49.94<br>(41.14-58.52)    | 2,144.94<br>(1,705.91-2,644.27)                                                               | 2,139.87<br>(1,684.81-2,603.12) | 2,150.98<br>(1,712.82-2,671.85) |
| Djibouti              | 1.35<br>(0.58-2.81)                                                                 | 1.51<br>(1.06-2.10) | 0.91<br>(0.55-1.42) | 1.93<br>(1.73-2.19)                                                                        | 2.32<br>(2.10-2.58) | 2.21<br>(2.00-2.45) | 5.93<br>(1.35-19.42)                                                           | 8.03<br>(1.96-22.03)      | 3.61<br>(0.50-10.03)      | 2,145.11<br>(1,705.64-2,643.20)                                                               | 2,139.93<br>(1,685.02-2,605.23) | 2,150.94<br>(1,713.51-2,671.24) |

**Appendix Table 1b. Unscaled values for each SDG health-related indicator by country for 1990, 2000, and 2015**

| Location    | Indicator 3.3.1: Age-standardised rate of new HIV infections (per 1,000 population) |                        |                     | Indicator 3.3.2: Age-standardised rate of new and relapsed TB cases (per 1,000 population) |                     |                     | Indicator 3.3.3: Age-standardised rate of malaria cases (per 1,000 population) |                           |                           | Indicator 3.3.4: Age-standardised rate of hepatitis B incident cases (per 100,000 population) |                                 |                                 |
|-------------|-------------------------------------------------------------------------------------|------------------------|---------------------|--------------------------------------------------------------------------------------------|---------------------|---------------------|--------------------------------------------------------------------------------|---------------------------|---------------------------|-----------------------------------------------------------------------------------------------|---------------------------------|---------------------------------|
|             | 1990                                                                                | 2000                   | 2015                | 1990                                                                                       | 2000                | 2015                | 1990                                                                           | 2000                      | 2015                      | 1990                                                                                          | 2000                            | 2015                            |
| Eritrea     | 0.84<br>(0.49-1.44)                                                                 | 0.79<br>(0.59-1.07)    | 0.43<br>(0.27-0.63) | 2.18<br>(1.98-2.41)                                                                        | 2.16<br>(2.00-2.37) | 1.82<br>(1.67-2.01) | 36.97<br>(26.20-47.91)                                                         | 36.90<br>(26.11-48.15)    | 17.72<br>(5.00-50.03)     | 2,144.44<br>(1,702.57-2,644.98)                                                               | 2,139.50<br>(1,683.28-2,603.73) | 2,150.64<br>(1,710.27-2,669.89) |
| Ethiopia    | 3.53<br>(2.55-4.60)                                                                 | 2.61<br>(1.99-3.27)    | 0.81<br>(0.58-1.08) | 4.71<br>(4.31-5.20)                                                                        | 4.76<br>(4.39-5.20) | 2.58<br>(2.37-2.89) | 44.87<br>(22.80-70.46)                                                         | 44.61<br>(22.65-70.04)    | 5.04<br>(3.73-6.37)       | 2,029.63<br>(1,819.02-2,278.09)                                                               | 2,008.76<br>(1,794.22-2,243.88) | 2,012.18<br>(1,780.70-2,266.03) |
| Kenya       | 11.07<br>(10.65-11.51)                                                              | 4.42<br>(3.97-4.90)    | 3.60<br>(3.02-4.29) | 1.63<br>(1.37-1.94)                                                                        | 2.77<br>(2.40-3.27) | 1.80<br>(1.52-2.12) | 137.09<br>(102.56-173.28)                                                      | 149.39<br>(113.01-186.29) | 97.21<br>(52.42-163.33)   | 1,855.84<br>(1,662.09-2,079.97)                                                               | 1,867.63<br>(1,671.92-2,096.01) | 1,869.18<br>(1,653.66-2,100.65) |
| Madagascar  | 1.54<br>(0.08-11.33)                                                                | 0.25<br>(0.05-1.22)    | 0.09<br>(0.02-0.25) | 1.72<br>(1.57-1.90)                                                                        | 1.51<br>(1.37-1.66) | 1.31<br>(1.16-1.49) | 113.35<br>(80.63-152.77)                                                       | 121.83<br>(86.95-163.54)  | 60.44<br>(48.67-77.84)    | 2,144.71<br>(1,703.70-2,640.73)                                                               | 2,139.39<br>(1,682.94-2,600.46) | 2,150.55<br>(1,713.01-2,671.81) |
| Malawi      | 14.28<br>(12.58-16.21)                                                              | 13.48<br>(11.17-16.12) | 5.26<br>(3.33-6.88) | 3.49<br>(3.17-3.94)                                                                        | 6.00<br>(5.55-6.58) | 3.38<br>(3.06-3.76) | 275.83<br>(201.15-345.78)                                                      | 272.53<br>(198.29-342.24) | 171.08<br>(133.17-217.77) | 1,985.91<br>(1,766.34-2,246.09)                                                               | 1,995.04<br>(1,769.57-2,254.94) | 1,985.86<br>(1,746.46-2,254.68) |
| Mozambique  | 3.28<br>(2.75-3.95)                                                                 | 10.91<br>(9.75-12.27)  | 7.11<br>(5.17-9.33) | 2.53<br>(2.28-2.84)                                                                        | 4.29<br>(3.93-4.73) | 4.75<br>(4.28-5.29) | 316.56<br>(255.41-387.67)                                                      | 320.63<br>(259.66-392.56) | 211.96<br>(148.93-271.50) | 1,990.43<br>(1,765.67-2,258.90)                                                               | 1,983.07<br>(1,766.81-2,237.70) | 1,985.80<br>(1,747.37-2,254.25) |
| Rwanda      | 5.46<br>(4.47-6.66)                                                                 | 3.50<br>(2.86-4.22)    | 1.15<br>(0.82-1.54) | 3.06<br>(2.78-3.44)                                                                        | 3.38<br>(3.12-3.70) | 1.45<br>(1.31-1.62) | 110.61<br>(37.81-216.30)                                                       | 112.72<br>(38.96-217.61)  | 33.47<br>(17.55-57.79)    | 2,144.30<br>(1,701.52-2,644.50)                                                               | 2,138.04<br>(1,678.02-2,604.29) | 2,148.81<br>(1,709.85-2,667.96) |
| Somalia     | 0.25<br>(0.13-0.46)                                                                 | 0.51<br>(0.38-0.67)    | 0.29<br>(0.19-0.45) | 2.49<br>(2.26-2.81)                                                                        | 2.89<br>(2.64-3.20) | 2.85<br>(2.63-3.10) | 61.00<br>(40.44-89.07)                                                         | 63.43<br>(41.83-91.90)    | 45.06<br>(24.68-75.29)    | 2,023.45<br>(1,801.16-2,274.94)                                                               | 2,007.76<br>(1,792.15-2,256.58) | 2,017.20<br>(1,786.22-2,277.97) |
| South Sudan | 1.02<br>(0.35-2.14)                                                                 | 1.87<br>(1.22-2.69)    | 1.27<br>(0.73-1.92) | 3.32<br>(2.95-3.75)                                                                        | 3.83<br>(3.44-4.32) | 3.43<br>(3.08-3.83) | 165.52<br>(85.78-238.74)                                                       | 190.35<br>(106.77-268.48) | 110.89<br>(53.28-197.92)  | 2,144.67<br>(1,704.01-2,644.39)                                                               | 2,139.47<br>(1,683.92-2,601.24) | 2,150.68<br>(1,713.40-2,671.16) |
| Tanzania    | 7.17<br>(6.30-8.20)                                                                 | 5.63<br>(4.64-6.80)    | 3.03<br>(2.23-4.09) | 3.17<br>(2.89-3.45)                                                                        | 4.23<br>(3.91-4.57) | 3.18<br>(2.92-3.45) | 211.70<br>(152.92-266.30)                                                      | 229.48<br>(169.63-285.69) | 98.81<br>(76.82-126.30)   | 2,013.83<br>(1,795.15-2,267.43)                                                               | 2,014.47<br>(1,802.20-2,267.27) | 2,026.30<br>(1,802.88-2,298.37) |

**Appendix Table 1b. Unscaled values for each SDG health-related indicator by country for 1990, 2000, and 2015**

| Location                         | Indicator 3.3.1: Age-standardised rate of new HIV infections (per 1,000 population) |                        |                     | Indicator 3.3.2: Age-standardised rate of new and relapsed TB cases (per 1,000 population) |                     |                     | Indicator 3.3.3: Age-standardised rate of malaria cases (per 1,000 population) |                           |                           | Indicator 3.3.4: Age-standardised rate of hepatitis B incident cases (per 100,000 population) |                                 |                                 |
|----------------------------------|-------------------------------------------------------------------------------------|------------------------|---------------------|--------------------------------------------------------------------------------------------|---------------------|---------------------|--------------------------------------------------------------------------------|---------------------------|---------------------------|-----------------------------------------------------------------------------------------------|---------------------------------|---------------------------------|
|                                  | 1990                                                                                | 2000                   | 2015                | 1990                                                                                       | 2000                | 2015                | 1990                                                                           | 2000                      | 2015                      | 1990                                                                                          | 2000                            | 2015                            |
| Uganda                           | 13.02<br>(10.10-16.25)                                                              | 6.53<br>(5.60-7.62)    | 3.97<br>(2.61-5.53) | 3.72<br>(3.36-4.18)                                                                        | 5.44<br>(4.99-6.04) | 3.15<br>(2.86-3.53) | 297.38<br>(236.50-375.81)                                                      | 298.17<br>(236.56-373.89) | 129.75<br>(75.70-196.41)  | 2,075.87<br>(1,848.12-2,340.14)                                                               | 2,071.20<br>(1,850.51-2,326.48) | 2,086.85<br>(1,852.32-2,358.78) |
| Zambia                           | 15.51<br>(13.70-17.65)                                                              | 13.65<br>(11.61-15.96) | 6.90<br>(5.56-8.27) | 4.15<br>(3.72-4.75)                                                                        | 7.24<br>(6.61-8.09) | 4.66<br>(4.20-5.23) | 224.70<br>(167.10-294.98)                                                      | 242.34<br>(183.88-317.31) | 139.82<br>(107.24-172.35) | 2,029.57<br>(1,801.50-2,273.94)                                                               | 2,027.37<br>(1,809.03-2,282.65) | 2,033.06<br>(1,795.12-2,290.41) |
| Angola                           | 0.75<br>(0.43-1.28)                                                                 | 1.86<br>(1.57-2.25)    | 1.63<br>(1.13-2.30) | 4.65<br>(4.21-5.17)                                                                        | 4.23<br>(3.86-4.70) | 3.50<br>(3.16-3.90) | 149.61<br>(89.45-209.75)                                                       | 177.11<br>(110.68-236.02) | 100.61<br>(60.05-147.80)  | 2,116.32<br>(1,783.13-2,491.55)                                                               | 2,113.88<br>(1,781.79-2,495.23) | 2,119.41<br>(1,776.02-2,468.62) |
| Central African Republic         | 7.15<br>(5.26-9.84)                                                                 | 6.81<br>(5.47-8.22)    | 3.65<br>(2.59-5.22) | 4.86<br>(4.46-5.42)                                                                        | 6.29<br>(5.77-6.87) | 4.60<br>(4.21-5.09) | 266.17<br>(164.80-357.32)                                                      | 292.28<br>(192.08-384.97) | 211.54<br>(89.32-326.90)  | 2,060.47<br>(1,836.66-2,321.64)                                                               | 2,057.90<br>(1,840.40-2,317.08) | 2,060.91<br>(1,826.94-2,321.13) |
| Congo                            | 5.14<br>(4.10-6.44)                                                                 | 3.26<br>(2.64-3.95)    | 2.14<br>(1.31-3.00) | 4.23<br>(3.81-4.74)                                                                        | 3.77<br>(3.44-4.22) | 2.39<br>(2.16-2.67) | 200.22<br>(141.45-278.66)                                                      | 229.35<br>(167.01-317.75) | 158.29<br>(101.56-216.86) | 2,068.27<br>(1,849.53-2,336.06)                                                               | 2,050.27<br>(1,822.76-2,308.51) | 2,054.52<br>(1,806.26-2,322.16) |
| Democratic Republic of the Congo | 2.41<br>(1.73-3.12)                                                                 | 2.24<br>(1.80-2.76)    | 0.81<br>(0.44-1.53) | 3.42<br>(3.11-3.83)                                                                        | 3.48<br>(3.16-3.83) | 3.05<br>(2.69-3.44) | 302.79<br>(242.51-376.12)                                                      | 306.52<br>(245.21-379.36) | 189.79<br>(148.60-244.35) | 2,116.16<br>(1,783.43-2,491.23)                                                               | 2,113.80<br>(1,782.28-2,496.63) | 2,119.42<br>(1,776.23-2,470.85) |
| Equatorial Guinea                | 1.36<br>(0.73-2.70)                                                                 | 3.44<br>(2.74-4.10)    | 1.77<br>(1.13-2.95) | 2.92<br>(2.67-3.23)                                                                        | 3.45<br>(3.12-3.83) | 3.54<br>(3.13-4.00) | 264.84<br>(178.48-338.35)                                                      | 262.85<br>(177.20-335.44) | 241.19<br>(134.99-341.74) | 2,116.48<br>(1,779.99-2,493.34)                                                               | 2,114.20<br>(1,778.13-2,508.97) | 2,119.89<br>(1,776.39-2,472.77) |
| Gabon                            | 2.18<br>(1.71-2.73)                                                                 | 6.15<br>(5.15-7.41)    | 2.39<br>(1.44-3.80) | 4.04<br>(3.62-4.55)                                                                        | 5.19<br>(4.66-5.88) | 3.43<br>(3.06-3.85) | 231.88<br>(161.91-314.67)                                                      | 247.69<br>(176.23-333.56) | 149.00<br>(64.45-267.98)  | 2,083.75<br>(1,875.57-2,339.97)                                                               | 2,078.41<br>(1,857.85-2,338.28) | 2,078.73<br>(1,838.53-2,347.46) |

**Appendix Table 1b. Unscaled values for each SDG health-related indicator by country for 1990, 2000, and 2015**

| Location      | Indicator 3.3.5: Age-standardised prevalence rate of neglected tropical diseases (NTDs) (per 100,000 population) |                                 |                                 | Indicator 3.4.1: Death rate due to cardiovascular disease, cancer, diabetes, and chronic respiratory disease among populations aged 30 to 70 (per 100,000 population) |                           |                           | Indicator 3.4.2: Age-standardised death rate due to self-harm (per 100,000 population) |                        |                        | Indicator 3.5.2: Risk-weighted prevalence of alcohol consumption, as measured by the summary exposure value (SEV) for alcohol use |                        |                        |
|---------------|------------------------------------------------------------------------------------------------------------------|---------------------------------|---------------------------------|-----------------------------------------------------------------------------------------------------------------------------------------------------------------------|---------------------------|---------------------------|----------------------------------------------------------------------------------------|------------------------|------------------------|-----------------------------------------------------------------------------------------------------------------------------------|------------------------|------------------------|
|               | 1990                                                                                                             | 2000                            | 2015                            | 1990                                                                                                                                                                  | 2000                      | 2015                      | 1990                                                                                   | 2000                   | 2015                   | 1990                                                                                                                              | 2000                   | 2015                   |
| Canada        | 17.84<br>(16.40-19.39)                                                                                           | 18.12<br>(16.56-19.75)          | 15.76<br>(14.04-17.52)          | 370.96<br>(368.10-373.85)                                                                                                                                             | 296.98<br>(294.51-299.39) | 223.85<br>(218.09-229.51) | 13.62<br>(13.10-14.14)                                                                 | 12.53<br>(12.06-13.04) | 10.74<br>(10.12-11.37) | 12.90<br>(12.09-13.69)                                                                                                            | 12.13<br>(11.43-12.78) | 12.98<br>(11.85-14.02) |
| United States | 40.58<br>(36.13-44.92)                                                                                           | 55.86<br>(48.63-63.14)          | 53.04<br>(46.16-60.01)          | 451.56<br>(448.77-453.12)                                                                                                                                             | 378.51<br>(376.89-380.01) | 299.39<br>(296.66-303.75) | 12.74<br>(12.44-13.05)                                                                 | 11.32<br>(11.02-11.62) | 12.41<br>(11.92-12.87) | 13.75<br>(12.93-14.53)                                                                                                            | 13.42<br>(12.54-14.24) | 13.62<br>(12.05-14.99) |
| Australia     | 62.57<br>(47.45-89.80)                                                                                           | 52.78<br>(40.09-77.40)          | 48.96<br>(34.64-80.17)          | 377.96<br>(375.25-380.75)                                                                                                                                             | 266.93<br>(264.78-269.33) | 199.03<br>(195.95-202.37) | 13.46<br>(12.91-13.99)                                                                 | 12.77<br>(12.26-13.30) | 10.24<br>(9.68-10.80)  | 15.03<br>(14.02-15.98)                                                                                                            | 12.40<br>(11.55-13.23) | 13.67<br>(12.32-14.86) |
| New Zealand   | 17.86<br>(16.11-20.31)                                                                                           | 16.32<br>(14.85-18.08)          | 16.02<br>(14.56-17.66)          | 448.62<br>(442.99-453.54)                                                                                                                                             | 332.57<br>(328.41-336.88) | 230.31<br>(223.57-237.60) | 14.06<br>(13.39-14.74)                                                                 | 13.28<br>(12.69-13.84) | 10.90<br>(10.25-11.56) | 13.90<br>(13.10-14.68)                                                                                                            | 12.49<br>(11.63-13.35) | 13.05<br>(11.85-14.20) |
| Brunei        | 231.91<br>(186.51-296.17)                                                                                        | 212.61<br>(175.08-266.67)       | 294.61<br>(224.11-384.28)       | 509.89<br>(488.64-532.91)                                                                                                                                             | 420.14<br>(404.65-437.12) | 362.14<br>(340.22-386.45) | 4.99<br>(4.23-6.06)                                                                    | 4.27<br>(3.83-4.88)    | 4.33<br>(3.76-4.92)    | 10.23<br>(8.84-11.56)                                                                                                             | 9.41<br>(8.14-10.60)   | 9.13<br>(7.98-10.27)   |
| Japan         | 82.17<br>(72.49-92.74)                                                                                           | 81.67<br>(72.02-91.71)          | 80.18<br>(70.37-90.53)          | 276.85<br>(275.42-278.82)                                                                                                                                             | 239.64<br>(238.35-240.91) | 188.87<br>(187.14-190.59) | 16.91<br>(16.49-17.34)                                                                 | 19.52<br>(19.11-19.94) | 19.22<br>(18.69-19.79) | 11.21<br>(10.52-11.92)                                                                                                            | 11.50<br>(10.73-12.24) | 10.79<br>(9.61-11.86)  |
| Singapore     | 44.26<br>(29.58-71.77)                                                                                           | 39.15<br>(27.76-57.56)          | 119.11<br>(74.40-198.57)        | 499.61<br>(490.73-508.43)                                                                                                                                             | 335.71<br>(329.21-342.12) | 209.18<br>(199.95-218.48) | 17.20<br>(16.44-17.95)                                                                 | 12.40<br>(11.80-12.99) | 9.06<br>(8.44-9.66)    | 4.04<br>(3.59-4.52)                                                                                                               | 3.98<br>(3.52-4.48)    | 4.49<br>(3.96-5.08)    |
| South Korea   | 2,569.83<br>(2,359.17-2,802.55)                                                                                  | 2,450.09<br>(2,255.19-2,657.84) | 2,602.57<br>(2,340.50-2,901.99) | 532.81<br>(523.26-545.38)                                                                                                                                             | 351.89<br>(343.90-360.26) | 211.85<br>(200.71-222.55) | 12.29<br>(11.70-12.95)                                                                 | 20.32<br>(19.42-21.27) | 27.75<br>(25.87-29.78) | 9.76<br>(9.01-10.46)                                                                                                              | 11.04<br>(10.36-11.71) | 11.41<br>(10.39-12.44) |
| Andorra       | 36.42<br>(32.24-40.95)                                                                                           | 34.73<br>(30.09-39.84)          | 58.28<br>(48.18-69.90)          | 214.72<br>(184.73-232.31)                                                                                                                                             | 176.20<br>(150.42-189.15) | 154.04<br>(140.90-164.17) | 8.12<br>(4.65-10.69)                                                                   | 7.11<br>(4.11-9.51)    | 6.96<br>(4.94-9.25)    | 20.99<br>(17.58-23.67)                                                                                                            | 20.67<br>(18.57-22.58) | 16.92<br>(14.10-19.32) |
| Austria       | 28.28<br>(26.06-30.88)                                                                                           | 25.59<br>(23.72-27.73)          | 22.24<br>(20.22-24.31)          | 398.55<br>(394.01-405.57)                                                                                                                                             | 321.41<br>(317.95-327.48) | 232.60<br>(228.22-238.71) | 21.53<br>(20.70-22.43)                                                                 | 17.18<br>(16.49-17.89) | 12.52<br>(11.89-13.24) | 19.65<br>(18.16-21.01)                                                                                                            | 18.85<br>(17.33-20.33) | 18.05<br>(15.32-20.45) |

**Appendix Table 1b. Unscaled values for each SDG health-related indicator by country for 1990, 2000, and 2015**

| Location | Indicator 3.3.5: Age-standardised prevalence rate of neglected tropical diseases (NTDs) (per 100,000 population) |                           |                          | Indicator 3.4.1: Death rate due to cardiovascular disease, cancer, diabetes, and chronic respiratory disease among populations aged 30 to 70 (per 100,000 population) |                           |                           | Indicator 3.4.2: Age-standardised death rate due to self-harm (per 100,000 population) |                        |                        | Indicator 3.5.2: Risk-weighted prevalence of alcohol consumption, as measured by the summary exposure value (SEV) for alcohol use |                        |                        |
|----------|------------------------------------------------------------------------------------------------------------------|---------------------------|--------------------------|-----------------------------------------------------------------------------------------------------------------------------------------------------------------------|---------------------------|---------------------------|----------------------------------------------------------------------------------------|------------------------|------------------------|-----------------------------------------------------------------------------------------------------------------------------------|------------------------|------------------------|
|          | 1990                                                                                                             | 2000                      | 2015                     | 1990                                                                                                                                                                  | 2000                      | 2015                      | 1990                                                                                   | 2000                   | 2015                   | 1990                                                                                                                              | 2000                   | 2015                   |
| Belgium  | 23.66<br>(21.30-26.93)                                                                                           | 19.91<br>(18.10-22.13)    | 18.08<br>(16.30-20.14)   | 398.69<br>(393.85-403.49)                                                                                                                                             | 326.36<br>(322.32-330.84) | 252.18<br>(240.86-264.60) | 18.85<br>(18.15-19.64)                                                                 | 19.73<br>(19.00-20.49) | 16.77<br>(15.65-17.98) | 14.99<br>(14.23-15.82)                                                                                                            | 14.02<br>(12.66-15.36) | 15.65<br>(13.20-17.78) |
| Cyprus   | 25.46<br>(23.18-28.20)                                                                                           | 23.51<br>(21.30-25.96)    | 21.08<br>(19.02-23.19)   | 349.59<br>(339.51-359.85)                                                                                                                                             | 341.53<br>(332.97-349.77) | 220.81<br>(214.02-228.73) | 3.87<br>(3.43-4.36)                                                                    | 4.04<br>(3.67-4.57)    | 3.18<br>(2.83-3.62)    | 13.63<br>(12.41-14.72)                                                                                                            | 12.80<br>(11.53-13.98) | 12.68<br>(10.74-14.48) |
| Denmark  | 20.69<br>(18.93-22.52)                                                                                           | 20.52<br>(18.89-22.22)    | 19.72<br>(17.97-21.58)   | 475.68<br>(470.40-481.12)                                                                                                                                             | 375.25<br>(370.53-383.15) | 248.05<br>(239.96-258.82) | 25.37<br>(24.31-26.45)                                                                 | 14.54<br>(13.89-15.24) | 10.35<br>(9.66-11.07)  | 18.89<br>(17.42-20.25)                                                                                                            | 20.18<br>(18.63-21.66) | 17.83<br>(14.59-20.58) |
| Finland  | 17.14<br>(15.52-18.80)                                                                                           | 15.08<br>(13.67-16.55)    | 14.30<br>(12.88-15.77)   | 422.70<br>(417.00-428.57)                                                                                                                                             | 302.90<br>(298.32-310.85) | 224.22<br>(215.77-236.05) | 28.24<br>(27.03-29.35)                                                                 | 22.10<br>(21.19-23.08) | 15.71<br>(14.73-16.80) | 15.21<br>(14.03-16.30)                                                                                                            | 15.24<br>(14.09-16.33) | 15.40<br>(13.39-17.26) |
| France   | 28.43<br>(26.12-31.01)                                                                                           | 25.34<br>(23.38-27.66)    | 23.04<br>(20.91-25.26)   | 338.21<br>(335.29-342.95)                                                                                                                                             | 296.94<br>(294.41-299.89) | 241.50<br>(236.14-246.79) | 23.04<br>(22.13-23.93)                                                                 | 19.28<br>(18.57-20.05) | 16.48<br>(15.44-17.42) | 17.60<br>(16.61-18.54)                                                                                                            | 15.22<br>(14.25-16.19) | 13.99<br>(12.28-15.50) |
| Germany  | 23.11<br>(21.11-25.36)                                                                                           | 20.63<br>(18.73-22.59)    | 19.78<br>(17.86-21.75)   | 436.74<br>(433.84-440.04)                                                                                                                                             | 337.13<br>(334.29-342.06) | 249.28<br>(245.21-253.97) | 14.63<br>(14.02-15.22)                                                                 | 13.03<br>(12.51-13.58) | 10.42<br>(9.88-10.93)  | 17.08<br>(16.21-17.90)                                                                                                            | 15.53<br>(14.67-16.40) | 13.60<br>(12.13-15.04) |
[truncated: 964,680 more chars]
